# Supplementary material for: Transcriptomic identification of HBx-associated hub genes in hepatocellular carcinoma
Source: PeerJ. 2021 Dec 22;9:e12697. doi: 10.7717/peerj.12697 (PMC8710059; doi:10.7717/peerj.12697)
Supplement: Supplemental Information 9 [file peerj-09-12697-s009.xlsx]

## Sheet: Sample Setup
Block Type	384-Well Block
Calibration Background is expired	Yes
Calibration Background performed on	10-12-2018 11:47:46 PDT
Calibration FAM is expired	Yes
Calibration FAM performed on	10-23-2018 10:23:19 PDT
Calibration MELTDOCTOR is expired	Yes
Calibration MELTDOCTOR performed on	09-26-2017 21:22:46 PDT
Calibration NED is expired	Yes
Calibration NED performed on	10-23-2018 10:33:14 PDT
Calibration ROI is expired	Yes
Calibration ROI performed on	10-12-2018 09:37:21 PDT
Calibration ROX is expired	Yes
Calibration ROX performed on	10-23-2018 10:07:21 PDT
Calibration SYBR is expired	Yes
Calibration SYBR performed on	10-23-2018 09:57:53 PDT
Calibration TAMRA is expired	Yes
Calibration TAMRA performed on	10-23-2018 10:45:25 PDT
Calibration Uniformity is expired	Yes
Calibration Uniformity performed on	10-12-2018 10:06:59 PDT
Calibration VIC is expired	Yes
Calibration VIC performed on	10-23-2018 10:54:25 PDT
Chemistry	SYBR_GREEN
Date Created	10-12-2020 12:11:37 PDT
Experiment File Name	D:\NZZ\2020-10-12 101128.eds
Experiment Name	2020-10-12 101128
Experiment Run End Time	10-12-2020 04:51:15 PDT
Experiment Type	Comparative Cт (ΔΔCт)
Instrument Name	285880860
Instrument Serial Number	285880860
Instrument Type	QuantStudio 12K Flex
Passive Reference	ROX
Quantification Cycle Method	Ct
Signal Smoothing On	true
Stage/ Cycle where Analysis is performed	Stage 2, Step 2
Well	Well Position	Sample Name	Sample Color	Biogroup Name	Biogroup Color	Target Name	Target Color	Task	Reporter	Quencher	Quantity	Comments
1	A1
2	A2
3	A3
4	A4
5	A5
6	A6
7	A7
8	A8
9	A9
10	A10
11	A11
12	A12
13	A13	Vec	RGB(176,23,31)			PALM2	RGB(176,23,31)	UNKNOWN	SYBR	None
14	A14	Vec	RGB(176,23,31)			PALM2	RGB(176,23,31)	UNKNOWN	SYBR	None
15	A15	Vec	RGB(176,23,31)			PALM2	RGB(176,23,31)	UNKNOWN	SYBR	None
16	A16	HBx	RGB(0,0,255)			PALM2	RGB(176,23,31)	UNKNOWN	SYBR	None
17	A17	HBx	RGB(0,0,255)			PALM2	RGB(176,23,31)	UNKNOWN	SYBR	None
18	A18	HBx	RGB(0,0,255)			PALM2	RGB(176,23,31)	UNKNOWN	SYBR	None
19	A19	Vec	RGB(176,23,31)			ZNF358	RGB(238,44,44)	UNKNOWN	SYBR	None
20	A20	Vec	RGB(176,23,31)			ZNF358	RGB(238,44,44)	UNKNOWN	SYBR	None
21	A21	Vec	RGB(176,23,31)			ZNF358	RGB(238,44,44)	UNKNOWN	SYBR	None
22	A22	HBx	RGB(0,0,255)			ZNF358	RGB(238,44,44)	UNKNOWN	SYBR	None
23	A23	HBx	RGB(0,0,255)			ZNF358	RGB(238,44,44)	UNKNOWN	SYBR	None
24	A24	HBx	RGB(0,0,255)			ZNF358	RGB(238,44,44)	UNKNOWN	SYBR	None
25	B1
26	B2
27	B3
28	B4
29	B5
30	B6
31	B7
32	B8
33	B9
34	B10
35	B11
36	B12
37	B13	Vec	RGB(176,23,31)			MAGEA6	RGB(0,0,255)	UNKNOWN	SYBR	None
38	B14	Vec	RGB(176,23,31)			MAGEA6	RGB(0,0,255)	UNKNOWN	SYBR	None
39	B15	Vec	RGB(176,23,31)			MAGEA6	RGB(0,0,255)	UNKNOWN	SYBR	None
40	B16	HBx	RGB(0,0,255)			MAGEA6	RGB(0,0,255)	UNKNOWN	SYBR	None
41	B17	HBx	RGB(0,0,255)			MAGEA6	RGB(0,0,255)	UNKNOWN	SYBR	None
42	B18	HBx	RGB(0,0,255)			MAGEA6	RGB(0,0,255)	UNKNOWN	SYBR	None
43	B19	Vec	RGB(176,23,31)			ADM	RGB(51,161,201)	UNKNOWN	SYBR	None
44	B20	Vec	RGB(176,23,31)			ADM	RGB(51,161,201)	UNKNOWN	SYBR	None
45	B21	Vec	RGB(176,23,31)			ADM	RGB(51,161,201)	UNKNOWN	SYBR	None
46	B22	HBx	RGB(0,0,255)			ADM	RGB(51,161,201)	UNKNOWN	SYBR	None
47	B23	HBx	RGB(0,0,255)			ADM	RGB(51,161,201)	UNKNOWN	SYBR	None
48	B24	HBx	RGB(0,0,255)			ADM	RGB(51,161,201)	UNKNOWN	SYBR	None
49	C1
50	C2
51	C3
52	C4
53	C5
54	C6
55	C7
56	C8
57	C9
58	C10
59	C11
60	C12
61	C13	Vec	RGB(176,23,31)			GNAL	RGB(0,139,69)	UNKNOWN	SYBR	None
62	C14	Vec	RGB(176,23,31)			GNAL	RGB(0,139,69)	UNKNOWN	SYBR	None
63	C15	Vec	RGB(176,23,31)			GNAL	RGB(0,139,69)	UNKNOWN	SYBR	None
64	C16	HBx	RGB(0,0,255)			GNAL	RGB(0,139,69)	UNKNOWN	SYBR	None
65	C17	HBx	RGB(0,0,255)			GNAL	RGB(0,139,69)	UNKNOWN	SYBR	None
66	C18	HBx	RGB(0,0,255)			GNAL	RGB(0,139,69)	UNKNOWN	SYBR	None
67	C19	Vec	RGB(176,23,31)			CCL15	RGB(238,18,137)	UNKNOWN	SYBR	None
68	C20	Vec	RGB(176,23,31)			CCL15	RGB(238,18,137)	UNKNOWN	SYBR	None
69	C21	Vec	RGB(176,23,31)			CCL15	RGB(238,18,137)	UNKNOWN	SYBR	None
70	C22	HBx	RGB(0,0,255)			CCL15	RGB(238,18,137)	UNKNOWN	SYBR	None
71	C23	HBx	RGB(0,0,255)			CCL15	RGB(238,18,137)	UNKNOWN	SYBR	None
72	C24	HBx	RGB(0,0,255)			CCL15	RGB(238,18,137)	UNKNOWN	SYBR	None
73	D1
74	D2
75	D3
76	D4
77	D5
78	D6
79	D7
80	D8
81	D9
82	D10
83	D11
84	D12
85	D13	Vec	RGB(176,23,31)			FAMI10C	RGB(238,238,0)	UNKNOWN	SYBR	None
86	D14	Vec	RGB(176,23,31)			FAMI10C	RGB(238,238,0)	UNKNOWN	SYBR	None
87	D15	Vec	RGB(176,23,31)			FAMI10C	RGB(238,238,0)	UNKNOWN	SYBR	None
88	D16	HBx	RGB(0,0,255)			FAMI10C	RGB(238,238,0)	UNKNOWN	SYBR	None
89	D17	HBx	RGB(0,0,255)			FAMI10C	RGB(238,238,0)	UNKNOWN	SYBR	None
90	D18	HBx	RGB(0,0,255)			FAMI10C	RGB(238,238,0)	UNKNOWN	SYBR	None
91	D19	Vec	RGB(176,23,31)			ARG1	RGB(176,23,31)	UNKNOWN	SYBR	None
92	D20	Vec	RGB(176,23,31)			ARG1	RGB(176,23,31)	UNKNOWN	SYBR	None
93	D21	Vec	RGB(176,23,31)			ARG1	RGB(176,23,31)	UNKNOWN	SYBR	None
94	D22	HBx	RGB(0,0,255)			ARG1	RGB(176,23,31)	UNKNOWN	SYBR	None
95	D23	HBx	RGB(0,0,255)			ARG1	RGB(176,23,31)	UNKNOWN	SYBR	None
96	D24	HBx	RGB(0,0,255)			ARG1	RGB(176,23,31)	UNKNOWN	SYBR	None
97	E1
98	E2
99	E3
100	E4
101	E5
102	E6
103	E7
104	E8
105	E9
106	E10
107	E11
108	E12
109	E13	Vec	RGB(176,23,31)			CPEB3	RGB(139,137,112)	UNKNOWN	SYBR	None
110	E14	Vec	RGB(176,23,31)			CPEB3	RGB(139,137,112)	UNKNOWN	SYBR	None
111	E15	Vec	RGB(176,23,31)			CPEB3	RGB(139,137,112)	UNKNOWN	SYBR	None
112	E16	HBx	RGB(0,0,255)			CPEB3	RGB(139,137,112)	UNKNOWN	SYBR	None
113	E17	HBx	RGB(0,0,255)			CPEB3	RGB(139,137,112)	UNKNOWN	SYBR	None
114	E18	HBx	RGB(0,0,255)			CPEB3	RGB(139,137,112)	UNKNOWN	SYBR	None
115	E19	Vec	RGB(176,23,31)			SEMA4D	RGB(0,0,255)	UNKNOWN	SYBR	None
116	E20	Vec	RGB(176,23,31)			SEMA4D	RGB(0,0,255)	UNKNOWN	SYBR	None
117	E21	Vec	RGB(176,23,31)			SEMA4D	RGB(0,0,255)	UNKNOWN	SYBR	None
118	E22	HBx	RGB(0,0,255)			SEMA4D	RGB(0,0,255)	UNKNOWN	SYBR	None
119	E23	HBx	RGB(0,0,255)			SEMA4D	RGB(0,0,255)	UNKNOWN	SYBR	None
120	E24	HBx	RGB(0,0,255)			SEMA4D	RGB(0,0,255)	UNKNOWN	SYBR	None
121	F1
122	F2
123	F3
124	F4
125	F5
126	F6
127	F7
128	F8
129	F9
130	F10
131	F11
132	F12
133	F13	Vec	RGB(176,23,31)			CYC	RGB(238,121,66)	UNKNOWN	SYBR	None
134	F14	Vec	RGB(176,23,31)			CYC	RGB(238,121,66)	UNKNOWN	SYBR	None
135	F15	Vec	RGB(176,23,31)			CYC	RGB(238,121,66)	UNKNOWN	SYBR	None
136	F16	HBx	RGB(0,0,255)			CYC	RGB(238,121,66)	UNKNOWN	SYBR	None
137	F17	HBx	RGB(0,0,255)			CYC	RGB(238,121,66)	UNKNOWN	SYBR	None
138	F18	HBx	RGB(0,0,255)			CYC	RGB(238,121,66)	UNKNOWN	SYBR	None
139	F19	Vec	RGB(176,23,31)			RGS5	RGB(0,139,69)	UNKNOWN	SYBR	None
140	F20	Vec	RGB(176,23,31)			RGS5	RGB(0,139,69)	UNKNOWN	SYBR	None
141	F21	Vec	RGB(176,23,31)			RGS5	RGB(0,139,69)	UNKNOWN	SYBR	None
142	F22	HBx	RGB(0,0,255)			RGS5	RGB(0,139,69)	UNKNOWN	SYBR	None
143	F23	HBx	RGB(0,0,255)			RGS5	RGB(0,139,69)	UNKNOWN	SYBR	None
144	F24	HBx	RGB(0,0,255)			RGS5	RGB(0,139,69)	UNKNOWN	SYBR	None
145	G1
146	G2
147	G3
148	G4
149	G5
150	G6
151	G7
152	G8
153	G9
154	G10
155	G11
156	G12
157	G13	Vec	RGB(176,23,31)			ANGPTL6	RGB(142,56,142)	UNKNOWN	SYBR	None
158	G14	Vec	RGB(176,23,31)			ANGPTL6	RGB(142,56,142)	UNKNOWN	SYBR	None
159	G15	Vec	RGB(176,23,31)			ANGPTL6	RGB(142,56,142)	UNKNOWN	SYBR	None
160	G16	HBx	RGB(0,0,255)			ANGPTL6	RGB(142,56,142)	UNKNOWN	SYBR	None
161	G17	HBx	RGB(0,0,255)			ANGPTL6	RGB(142,56,142)	UNKNOWN	SYBR	None
162	G18	HBx	RGB(0,0,255)			ANGPTL6	RGB(142,56,142)	UNKNOWN	SYBR	None
163	G19	Vec	RGB(176,23,31)			NAPIL3	RGB(238,238,0)	UNKNOWN	SYBR	None
164	G20	Vec	RGB(176,23,31)			NAPIL3	RGB(238,238,0)	UNKNOWN	SYBR	None
165	G21	Vec	RGB(176,23,31)			NAPIL3	RGB(238,238,0)	UNKNOWN	SYBR	None
166	G22	HBx	RGB(0,0,255)			NAPIL3	RGB(238,238,0)	UNKNOWN	SYBR	None
167	G23	HBx	RGB(0,0,255)			NAPIL3	RGB(238,238,0)	UNKNOWN	SYBR	None
168	G24	HBx	RGB(0,0,255)			NAPIL3	RGB(238,238,0)	UNKNOWN	SYBR	None
169	H1
170	H2
171	H3
172	H4
173	H5
174	H6
175	H7
176	H8
177	H9
178	H10
179	H11
180	H12
181	H13	Vec	RGB(176,23,31)			ALDOB	RGB(198,113,113)	UNKNOWN	SYBR	None
182	H14	Vec	RGB(176,23,31)			ALDOB	RGB(198,113,113)	UNKNOWN	SYBR	None
183	H15	Vec	RGB(176,23,31)			ALDOB	RGB(198,113,113)	UNKNOWN	SYBR	None
184	H16	HBx	RGB(0,0,255)			ALDOB	RGB(198,113,113)	UNKNOWN	SYBR	None
185	H17	HBx	RGB(0,0,255)			ALDOB	RGB(198,113,113)	UNKNOWN	SYBR	None
186	H18	HBx	RGB(0,0,255)			ALDOB	RGB(198,113,113)	UNKNOWN	SYBR	None
187	H19	Vec	RGB(176,23,31)			HEY1	RGB(139,137,112)	UNKNOWN	SYBR	None
188	H20	Vec	RGB(176,23,31)			HEY1	RGB(139,137,112)	UNKNOWN	SYBR	None
189	H21	Vec	RGB(176,23,31)			HEY1	RGB(139,137,112)	UNKNOWN	SYBR	None
190	H22	HBx	RGB(0,0,255)			HEY1	RGB(139,137,112)	UNKNOWN	SYBR	None
191	H23	HBx	RGB(0,0,255)			HEY1	RGB(139,137,112)	UNKNOWN	SYBR	None
192	H24	HBx	RGB(0,0,255)			HEY1	RGB(139,137,112)	UNKNOWN	SYBR	None
193	I1
194	I2
195	I3
196	I4
197	I5
198	I6
199	I7
200	I8
201	I9
202	I10
203	I11
204	I12
205	I13	Vec	RGB(176,23,31)			ALDH8A1	RGB(0,245,255)	UNKNOWN	SYBR	None
206	I14	Vec	RGB(176,23,31)			ALDH8A1	RGB(0,245,255)	UNKNOWN	SYBR	None
207	I15	Vec	RGB(176,23,31)			ALDH8A1	RGB(0,245,255)	UNKNOWN	SYBR	None
208	I16	HBx	RGB(0,0,255)			ALDH8A1	RGB(0,245,255)	UNKNOWN	SYBR	None
209	I17	HBx	RGB(0,0,255)			ALDH8A1	RGB(0,245,255)	UNKNOWN	SYBR	None
210	I18	HBx	RGB(0,0,255)			ALDH8A1	RGB(0,245,255)	UNKNOWN	SYBR	None
211	I19	Vec	RGB(176,23,31)			EGR2	RGB(238,121,66)	UNKNOWN	SYBR	None
212	I20	Vec	RGB(176,23,31)			EGR2	RGB(238,121,66)	UNKNOWN	SYBR	None
213	I21	Vec	RGB(176,23,31)			EGR2	RGB(238,121,66)	UNKNOWN	SYBR	None
214	I22	HBx	RGB(0,0,255)			EGR2	RGB(238,121,66)	UNKNOWN	SYBR	None
215	I23	HBx	RGB(0,0,255)			EGR2	RGB(238,121,66)	UNKNOWN	SYBR	None
216	I24	HBx	RGB(0,0,255)			EGR2	RGB(238,121,66)	UNKNOWN	SYBR	None
217	J1
218	J2
219	J3
220	J4
221	J5
222	J6
223	J7
224	J8
225	J9
226	J10
227	J11
228	J12
229	J13	Vec	RGB(176,23,31)			GAL3ST2	RGB(238,220,130)	UNKNOWN	SYBR	None
230	J14	Vec	RGB(176,23,31)			GAL3ST2	RGB(238,220,130)	UNKNOWN	SYBR	None
231	J15	Vec	RGB(176,23,31)			GAL3ST2	RGB(238,220,130)	UNKNOWN	SYBR	None
232	J16	HBx	RGB(0,0,255)			GAL3ST2	RGB(238,220,130)	UNKNOWN	SYBR	None
233	J17	HBx	RGB(0,0,255)			GAL3ST2	RGB(238,220,130)	UNKNOWN	SYBR	None
234	J18	HBx	RGB(0,0,255)			GAL3ST2	RGB(238,220,130)	UNKNOWN	SYBR	None
235	J19	Vec	RGB(176,23,31)			PFKFB1	RGB(142,56,142)	UNKNOWN	SYBR	None
236	J20	Vec	RGB(176,23,31)			PFKFB1	RGB(142,56,142)	UNKNOWN	SYBR	None
237	J21	Vec	RGB(176,23,31)			PFKFB1	RGB(142,56,142)	UNKNOWN	SYBR	None
238	J22	HBx	RGB(0,0,255)			PFKFB1	RGB(142,56,142)	UNKNOWN	SYBR	None
239	J23	HBx	RGB(0,0,255)			PFKFB1	RGB(142,56,142)	UNKNOWN	SYBR	None
240	J24	HBx	RGB(0,0,255)			PFKFB1	RGB(142,56,142)	UNKNOWN	SYBR	None
241	K1
242	K2
243	K3
244	K4
245	K5
246	K6
247	K7
248	K8
249	K9
250	K10
251	K11
252	K12
253	K13	Vec	RGB(176,23,31)			CRYGS	RGB(255,127,0)	UNKNOWN	SYBR	None
254	K14	Vec	RGB(176,23,31)			CRYGS	RGB(255,127,0)	UNKNOWN	SYBR	None
255	K15	Vec	RGB(176,23,31)			CRYGS	RGB(255,127,0)	UNKNOWN	SYBR	None
256	K16	HBx	RGB(0,0,255)			CRYGS	RGB(255,127,0)	UNKNOWN	SYBR	None
257	K17	HBx	RGB(0,0,255)			CRYGS	RGB(255,127,0)	UNKNOWN	SYBR	None
258	K18	HBx	RGB(0,0,255)			CRYGS	RGB(255,127,0)	UNKNOWN	SYBR	None
259	K19	Vec	RGB(176,23,31)			KLHL11	RGB(198,113,113)	UNKNOWN	SYBR	None
260	K20	Vec	RGB(176,23,31)			KLHL11	RGB(198,113,113)	UNKNOWN	SYBR	None
261	K21	Vec	RGB(176,23,31)			KLHL11	RGB(198,113,113)	UNKNOWN	SYBR	None
262	K22	HBx	RGB(0,0,255)			KLHL11	RGB(198,113,113)	UNKNOWN	SYBR	None
263	K23	HBx	RGB(0,0,255)			KLHL11	RGB(198,113,113)	UNKNOWN	SYBR	None
264	K24	HBx	RGB(0,0,255)			KLHL11	RGB(198,113,113)	UNKNOWN	SYBR	None
265	L1
266	L2
267	L3
268	L4
269	L5
270	L6
271	L7
272	L8
273	L9
274	L10
275	L11
276	L12
277	L13	Vec	RGB(176,23,31)			TFPT	RGB(142,142,56)	UNKNOWN	SYBR	None
278	L14	Vec	RGB(176,23,31)			TFPT	RGB(142,142,56)	UNKNOWN	SYBR	None
279	L15	Vec	RGB(176,23,31)			TFPT	RGB(142,142,56)	UNKNOWN	SYBR	None
280	L16	HBx	RGB(0,0,255)			TFPT	RGB(142,142,56)	UNKNOWN	SYBR	None
281	L17	HBx	RGB(0,0,255)			TFPT	RGB(142,142,56)	UNKNOWN	SYBR	None
282	L18	HBx	RGB(0,0,255)			TFPT	RGB(142,142,56)	UNKNOWN	SYBR	None
283	L19	Vec	RGB(176,23,31)			WLS	RGB(0,245,255)	UNKNOWN	SYBR	None
284	L20	Vec	RGB(176,23,31)			WLS	RGB(0,245,255)	UNKNOWN	SYBR	None
285	L21	Vec	RGB(176,23,31)			WLS	RGB(0,245,255)	UNKNOWN	SYBR	None
286	L22	HBx	RGB(0,0,255)			WLS	RGB(0,245,255)	UNKNOWN	SYBR	None
287	L23	HBx	RGB(0,0,255)			WLS	RGB(0,245,255)	UNKNOWN	SYBR	None
288	L24	HBx	RGB(0,0,255)			WLS	RGB(0,245,255)	UNKNOWN	SYBR	None
289	M1
290	M2
291	M3
292	M4
293	M5
294	M6
295	M7	Vec-48h	RGB(0,139,69)			PALM2	RGB(176,23,31)	UNKNOWN	SYBR	None
296	M8	Vec-48h	RGB(0,139,69)			PALM2	RGB(176,23,31)	UNKNOWN	SYBR	None
297	M9	Vec-48h	RGB(0,139,69)			PALM2	RGB(176,23,31)	UNKNOWN	SYBR	None
298	M10	HBx-48h	RGB(255,127,0)			PALM2	RGB(176,23,31)	UNKNOWN	SYBR	None
299	M11	HBx-48h	RGB(255,127,0)			PALM2	RGB(176,23,31)	UNKNOWN	SYBR	None
300	M12	HBx-48h	RGB(255,127,0)			PALM2	RGB(176,23,31)	UNKNOWN	SYBR	None
301	M13	Vec-48h	RGB(0,139,69)			CPEB3	RGB(139,137,112)	UNKNOWN	SYBR	None
302	M14	Vec-48h	RGB(0,139,69)			CPEB3	RGB(139,137,112)	UNKNOWN	SYBR	None
303	M15	Vec-48h	RGB(0,139,69)			CPEB3	RGB(139,137,112)	UNKNOWN	SYBR	None
304	M16	HBx-48h	RGB(255,127,0)			CPEB3	RGB(139,137,112)	UNKNOWN	SYBR	None
305	M17	HBx-48h	RGB(255,127,0)			CPEB3	RGB(139,137,112)	UNKNOWN	SYBR	None
306	M18	HBx-48h	RGB(255,127,0)			CPEB3	RGB(139,137,112)	UNKNOWN	SYBR	None
307	M19	Vec	RGB(176,23,31)			THSD7A	RGB(238,220,130)	UNKNOWN	SYBR	None
308	M20	Vec	RGB(176,23,31)			THSD7A	RGB(238,220,130)	UNKNOWN	SYBR	None
309	M21	Vec	RGB(176,23,31)			THSD7A	RGB(238,220,130)	UNKNOWN	SYBR	None
310	M22	HBx	RGB(0,0,255)			THSD7A	RGB(238,220,130)	UNKNOWN	SYBR	None
311	M23	HBx	RGB(0,0,255)			THSD7A	RGB(238,220,130)	UNKNOWN	SYBR	None
312	M24	HBx	RGB(0,0,255)			THSD7A	RGB(238,220,130)	UNKNOWN	SYBR	None
313	N1
314	N2
315	N3
316	N4
317	N5
318	N6
319	N7	Vec-48h	RGB(0,139,69)			MAGEA6	RGB(0,0,255)	UNKNOWN	SYBR	None
320	N8	Vec-48h	RGB(0,139,69)			MAGEA6	RGB(0,0,255)	UNKNOWN	SYBR	None
321	N9	Vec-48h	RGB(0,139,69)			MAGEA6	RGB(0,0,255)	UNKNOWN	SYBR	None
322	N10	HBx-48h	RGB(255,127,0)			MAGEA6	RGB(0,0,255)	UNKNOWN	SYBR	None
323	N11	HBx-48h	RGB(255,127,0)			MAGEA6	RGB(0,0,255)	UNKNOWN	SYBR	None
324	N12	HBx-48h	RGB(255,127,0)			MAGEA6	RGB(0,0,255)	UNKNOWN	SYBR	None
325	N13	Vec-48h	RGB(0,139,69)			CYC	RGB(238,121,66)	UNKNOWN	SYBR	None
326	N14	Vec-48h	RGB(0,139,69)			CYC	RGB(238,121,66)	UNKNOWN	SYBR	None
327	N15	Vec-48h	RGB(0,139,69)			CYC	RGB(238,121,66)	UNKNOWN	SYBR	None
328	N16	HBx-48h	RGB(255,127,0)			CYC	RGB(238,121,66)	UNKNOWN	SYBR	None
329	N17	HBx-48h	RGB(255,127,0)			CYC	RGB(238,121,66)	UNKNOWN	SYBR	None
330	N18	HBx-48h	RGB(255,127,0)			CYC	RGB(238,121,66)	UNKNOWN	SYBR	None
331	N19	Vec	RGB(176,23,31)			STX11	RGB(255,127,0)	UNKNOWN	SYBR	None
332	N20	Vec	RGB(176,23,31)			STX11	RGB(255,127,0)	UNKNOWN	SYBR	None
333	N21	Vec	RGB(176,23,31)			STX11	RGB(255,127,0)	UNKNOWN	SYBR	None
334	N22	HBx	RGB(0,0,255)			STX11	RGB(255,127,0)	UNKNOWN	SYBR	None
335	N23	HBx	RGB(0,0,255)			STX11	RGB(255,127,0)	UNKNOWN	SYBR	None
336	N24	HBx	RGB(0,0,255)			STX11	RGB(255,127,0)	UNKNOWN	SYBR	None
337	O1
338	O2
339	O3
340	O4
341	O5
342	O6
343	O7	Vec-48h	RGB(0,139,69)			GNAL	RGB(0,139,69)	UNKNOWN	SYBR	None
344	O8	Vec-48h	RGB(0,139,69)			GNAL	RGB(0,139,69)	UNKNOWN	SYBR	None
345	O9	Vec-48h	RGB(0,139,69)			GNAL	RGB(0,139,69)	UNKNOWN	SYBR	None
346	O10	HBx-48h	RGB(255,127,0)			GNAL	RGB(0,139,69)	UNKNOWN	SYBR	None
347	O11	HBx-48h	RGB(255,127,0)			GNAL	RGB(0,139,69)	UNKNOWN	SYBR	None
348	O12	HBx-48h	RGB(255,127,0)			GNAL	RGB(0,139,69)	UNKNOWN	SYBR	None
349	O13	Vec-48h	RGB(0,139,69)			ANGPTL6	RGB(142,56,142)	UNKNOWN	SYBR	None
350	O14	Vec-48h	RGB(0,139,69)			ANGPTL6	RGB(142,56,142)	UNKNOWN	SYBR	None
351	O15	Vec-48h	RGB(0,139,69)			ANGPTL6	RGB(142,56,142)	UNKNOWN	SYBR	None
352	O16	HBx-48h	RGB(255,127,0)			ANGPTL6	RGB(142,56,142)	UNKNOWN	SYBR	None
353	O17	HBx-48h	RGB(255,127,0)			ANGPTL6	RGB(142,56,142)	UNKNOWN	SYBR	None
354	O18	HBx-48h	RGB(255,127,0)			ANGPTL6	RGB(142,56,142)	UNKNOWN	SYBR	None
355	O19	Vec	RGB(176,23,31)			C8A	RGB(142,142,56)	UNKNOWN	SYBR	None
356	O20	Vec	RGB(176,23,31)			C8A	RGB(142,142,56)	UNKNOWN	SYBR	None
357	O21	Vec	RGB(176,23,31)			C8A	RGB(142,142,56)	UNKNOWN	SYBR	None
358	O22	HBx	RGB(0,0,255)			C8A	RGB(142,142,56)	UNKNOWN	SYBR	None
359	O23	HBx	RGB(0,0,255)			C8A	RGB(142,142,56)	UNKNOWN	SYBR	None
360	O24	HBx	RGB(0,0,255)			C8A	RGB(142,142,56)	UNKNOWN	SYBR	None
361	P1
362	P2
363	P3
364	P4
365	P5
366	P6
367	P7	Vec-48h	RGB(0,139,69)			FAMI10C	RGB(238,238,0)	UNKNOWN	SYBR	None
368	P8	Vec-48h	RGB(0,139,69)			FAMI10C	RGB(238,238,0)	UNKNOWN	SYBR	None
369	P9	Vec-48h	RGB(0,139,69)			FAMI10C	RGB(238,238,0)	UNKNOWN	SYBR	None
370	P10	HBx-48h	RGB(255,127,0)			FAMI10C	RGB(238,238,0)	UNKNOWN	SYBR	None
371	P11	HBx-48h	RGB(255,127,0)			FAMI10C	RGB(238,238,0)	UNKNOWN	SYBR	None
372	P12	HBx-48h	RGB(255,127,0)			FAMI10C	RGB(238,238,0)	UNKNOWN	SYBR	None
373	P13	Vec-48h	RGB(0,139,69)			ALDOB	RGB(198,113,113)	UNKNOWN	SYBR	None
374	P14	Vec-48h	RGB(0,139,69)			ALDOB	RGB(198,113,113)	UNKNOWN	SYBR	None
375	P15	Vec-48h	RGB(0,139,69)			ALDOB	RGB(198,113,113)	UNKNOWN	SYBR	None
376	P16	HBx-48h	RGB(255,127,0)			ALDOB	RGB(198,113,113)	UNKNOWN	SYBR	None
377	P17	HBx-48h	RGB(255,127,0)			ALDOB	RGB(198,113,113)	UNKNOWN	SYBR	None
378	P18	HBx-48h	RGB(255,127,0)			ALDOB	RGB(198,113,113)	UNKNOWN	SYBR	None
379	P19	Vec	RGB(176,23,31)			TAT	RGB(238,44,44)	UNKNOWN	SYBR	None
380	P20	Vec	RGB(176,23,31)			TAT	RGB(238,44,44)	UNKNOWN	SYBR	None
381	P21	Vec	RGB(176,23,31)			TAT	RGB(238,44,44)	UNKNOWN	SYBR	None
382	P22	HBx	RGB(0,0,255)			TAT	RGB(238,44,44)	UNKNOWN	SYBR	None
383	P23	HBx	RGB(0,0,255)			TAT	RGB(238,44,44)	UNKNOWN	SYBR	None
384	P24	HBx	RGB(0,0,255)			TAT	RGB(238,44,44)	UNKNOWN	SYBR	None

## Sheet: Amplification Data
Block Type	384-Well Block
Calibration Background is expired	Yes
Calibration Background performed on	10-12-2018 11:47:46 PDT
Calibration FAM is expired	Yes
Calibration FAM performed on	10-23-2018 10:23:19 PDT
Calibration MELTDOCTOR is expired	Yes
Calibration MELTDOCTOR performed on	09-26-2017 21:22:46 PDT
Calibration NED is expired	Yes
Calibration NED performed on	10-23-2018 10:33:14 PDT
Calibration ROI is expired	Yes
Calibration ROI performed on	10-12-2018 09:37:21 PDT
Calibration ROX is expired	Yes
Calibration ROX performed on	10-23-2018 10:07:21 PDT
Calibration SYBR is expired	Yes
Calibration SYBR performed on	10-23-2018 09:57:53 PDT
Calibration TAMRA is expired	Yes
Calibration TAMRA performed on	10-23-2018 10:45:25 PDT
Calibration Uniformity is expired	Yes
Calibration Uniformity performed on	10-12-2018 10:06:59 PDT
Calibration VIC is expired	Yes
Calibration VIC performed on	10-23-2018 10:54:25 PDT
Chemistry	SYBR_GREEN
Date Created	10-12-2020 12:11:38 PDT
Experiment File Name	D:\NZZ\2020-10-12 101128.eds
Experiment Name	2020-10-12 101128
Experiment Run End Time	10-12-2020 04:51:15 PDT
Experiment Type	Comparative Cт (ΔΔCт)
Instrument Name	285880860
Instrument Serial Number	285880860
Instrument Type	QuantStudio 12K Flex
Passive Reference	ROX
Quantification Cycle Method	Ct
Signal Smoothing On	true
Stage/ Cycle where Analysis is performed	Stage 2, Step 2
Well	Cycle	Target Name	Rn	Delta Rn
1	1
1	2
1	3
1	4
1	5
1	6
1	7
1	8
1	9
1	10
1	11
1	12
1	13
1	14
1	15
1	16
1	17
1	18
1	19
1	20
1	21
1	22
1	23
1	24
1	25
1	26
1	27
1	28
1	29
1	30
1	31
1	32
1	33
1	34
1	35
1	36
1	37
1	38
1	39
1	40
2	1
2	2
2	3
2	4
2	5
2	6
2	7
2	8
2	9
2	10
2	11
2	12
2	13
2	14
2	15
2	16
2	17
2	18
2	19
2	20
2	21
2	22
2	23
2	24
2	25
2	26
2	27
2	28
2	29
2	30
2	31
2	32
2	33
2	34
2	35
2	36
2	37
2	38
2	39
2	40
3	1
3	2
3	3
3	4
3	5
3	6
3	7
3	8
3	9
3	10
3	11
3	12
3	13
3	14
3	15
3	16
3	17
3	18
3	19
3	20
3	21
3	22
3	23
3	24
3	25
3	26
3	27
3	28
3	29
3	30
3	31
3	32
3	33
3	34
3	35
3	36
3	37
3	38
3	39
3	40
4	1
4	2
4	3
4	4
4	5
4	6
4	7
4	8
4	9
4	10
4	11
4	12
4	13
4	14
4	15
4	16
4	17
4	18
4	19
4	20
4	21
4	22
4	23
4	24
4	25
4	26
4	27
4	28
4	29
4	30
4	31
4	32
4	33
4	34
4	35
4	36
4	37
4	38
4	39
4	40
5	1
5	2
5	3
5	4
5	5
5	6
5	7
5	8
5	9
5	10
5	11
5	12
5	13
5	14
5	15
5	16
5	17
5	18
5	19
5	20
5	21
5	22
5	23
5	24
5	25
5	26
5	27
5	28
5	29
5	30
5	31
5	32
5	33
5	34
5	35
5	36
5	37
5	38
5	39
5	40
6	1
6	2
6	3
6	4
6	5
6	6
6	7
6	8
6	9
6	10
6	11
6	12
6	13
6	14
6	15
6	16
6	17
6	18
6	19
6	20
6	21
6	22
6	23
6	24
6	25
6	26
6	27
6	28
6	29
6	30
6	31
6	32
6	33
6	34
6	35
6	36
6	37
6	38
6	39
6	40
7	1
7	2
7	3
7	4
7	5
7	6
7	7
7	8
7	9
7	10
7	11
7	12
7	13
7	14
7	15
7	16
7	17
7	18
7	19
7	20
7	21
7	22
7	23
7	24
7	25
7	26
7	27
7	28
7	29
7	30
7	31
7	32
7	33
7	34
7	35
7	36
7	37
7	38
7	39
7	40
8	1
8	2
8	3
8	4
8	5
8	6
8	7
8	8
8	9
8	10
8	11
8	12
8	13
8	14
8	15
8	16
8	17
8	18
8	19
8	20
8	21
8	22
8	23
8	24
8	25
8	26
8	27
8	28
8	29
8	30
8	31
8	32
8	33
8	34
8	35
8	36
8	37
8	38
8	39
8	40
9	1
9	2
9	3
9	4
9	5
9	6
9	7
9	8
9	9
9	10
9	11
9	12
9	13
9	14
9	15
9	16
9	17
9	18
9	19
9	20
9	21
9	22
9	23
9	24
9	25
9	26
9	27
9	28
9	29
9	30
9	31
9	32
9	33
9	34
9	35
9	36
9	37
9	38
9	39
9	40
10	1
10	2
10	3
10	4
10	5
10	6
10	7
10	8
10	9
10	10
10	11
10	12
10	13
10	14
10	15
10	16
10	17
10	18
10	19
10	20
10	21
10	22
10	23
10	24
10	25
10	26
10	27
10	28
10	29
10	30
10	31
10	32
10	33
10	34
10	35
10	36
10	37
10	38
10	39
10	40
11	1
11	2
11	3
11	4
11	5
11	6
11	7
11	8
11	9
11	10
11	11
11	12
11	13
11	14
11	15
11	16
11	17
11	18
11	19
11	20
11	21
11	22
11	23
11	24
11	25
11	26
11	27
11	28
11	29
11	30
11	31
11	32
11	33
11	34
11	35
11	36
11	37
11	38
11	39
11	40
12	1
12	2
12	3
12	4
12	5
12	6
12	7
12	8
12	9
12	10
12	11
12	12
12	13
12	14
12	15
12	16
12	17
12	18
12	19
12	20
12	21
12	22
12	23
12	24
12	25
12	26
12	27
12	28
12	29
12	30
12	31
12	32
12	33
12	34
12	35
12	36
12	37
12	38
12	39
12	40
13	1	PALM2	0.039475	-0.00280614
13	2	PALM2	0.0407069	-0.00224594
13	3	PALM2	0.0429903	-0.000634227
13	4	PALM2	0.0439627	-0.000333504
13	5	PALM2	0.0454627	0.000494824
13	6	PALM2	0.0462947	0.000655238
13	7	PALM2	0.0466313	0.000320124
13	8	PALM2	0.0475137	0.000530904
13	9	PALM2	0.0481549	0.0005004
13	10	PALM2	0.0485698	0.000243667
13	11	PALM2	0.0492865	0.000288701
13	12	PALM2	0.0498927	0.000223172
13	13	PALM2	0.050188	-0.000153166
13	14	PALM2	0.0502531	-0.000759756
13	15	PALM2	0.0505841	-0.00110039
13	16	PALM2	0.0508665	-0.00148971
13	17	PALM2	0.051488	-0.00153982
13	18	PALM2	0.052632	-0.00106749
13	19	PALM2	0.0548821	0.000510935
13	20	PALM2	0.0583529	0.0033101
13	21	PALM2	0.0642127	0.0084982
13	22	PALM2	0.0758868	0.0195006
13	23	PALM2	0.0996426	0.0425847
13	24	PALM2	0.144481	0.0867513
13	25	PALM2	0.22625	0.167849
13	26	PALM2	0.365141	0.306068
13	27	PALM2	0.574262	0.514517
13	28	PALM2	0.835978	0.775562
13	29	PALM2	1.09234	1.03125
13	30	PALM2	1.28615	1.22439
13	31	PALM2	1.40414	1.34171
13	32	PALM2	1.47278	1.40968
13	33	PALM2	1.51106	1.44729
13	34	PALM2	1.53736	1.47292
13	35	PALM2	1.55665	1.49153
13	36	PALM2	1.5719	1.50611
13	37	PALM2	1.58448	1.51801
13	38	PALM2	1.59376	1.52662
13	39	PALM2	1.59843	1.53063
13	40	PALM2	1.60386	1.53538
14	1	PALM2	0.0292703	-0.00247281
14	2	PALM2	0.0303851	-0.00189448
14	3	PALM2	0.0321081	-0.000707828
14	4	PALM2	0.0333945	4.2169e-05
14	5	PALM2	0.034035	0.000146216
14	6	PALM2	0.0349395	0.000514318
14	7	PALM2	0.0356718	0.00071026
14	8	PALM2	0.035866	0.000368077
14	9	PALM2	0.0364411	0.000406696
14	10	PALM2	0.0369307	0.000359977
14	11	PALM2	0.0370354	-7.1722e-05
14	12	PALM2	0.0375396	-0.000103935
14	13	PALM2	0.0378187	-0.000361272
14	14	PALM2	0.0380256	-0.000690745
14	15	PALM2	0.0383975	-0.000855299
14	16	PALM2	0.0391247	-0.000664468
14	17	PALM2	0.0392805	-0.00104512
14	18	PALM2	0.0400882	-0.000773792
14	19	PALM2	0.041407	8.60793e-06
14	20	PALM2	0.0446526	0.00271786
14	21	PALM2	0.0506612	0.00819003
14	22	PALM2	0.0620641	0.0190565
14	23	PALM2	0.0844096	0.0408657
14	24	PALM2	0.127134	0.0830535
14	25	PALM2	0.205057	0.16044
14	26	PALM2	0.338985	0.293832
14	27	PALM2	0.543277	0.497587
14	28	PALM2	0.802697	0.756471
14	29	PALM2	1.06144	1.01468
14	30	PALM2	1.26244	1.21514
14	31	PALM2	1.38818	1.34034
14	32	PALM2	1.4545	1.40612
14	33	PALM2	1.49776	1.44886
14	34	PALM2	1.52751	1.47806
14	35	PALM2	1.54684	1.49686
14	36	PALM2	1.56043	1.50991
14	37	PALM2	1.57198	1.52092
14	38	PALM2	1.57968	1.52809
14	39	PALM2	1.58676	1.53463
14	40	PALM2	1.59145	1.53878
15	1	PALM2	0.0434892	-0.00558478
15	2	PALM2	0.0450051	-0.00492431
15	3	PALM2	0.0483043	-0.00248051
15	4	PALM2	0.0505798	-0.00106039
15	5	PALM2	0.0523015	-0.000194059
15	6	PALM2	0.0536084	0.000257519
15	7	PALM2	0.0560464	0.0018401
15	8	PALM2	0.05676	0.00169836
15	9	PALM2	0.0572513	0.00133425
15	10	PALM2	0.0578276	0.00105517
15	11	PALM2	0.0582276	0.000599735
15	12	PALM2	0.0588074	0.000324185
15	13	PALM2	0.0593593	2.06958e-05
15	14	PALM2	0.0598426	-0.000351309
15	15	PALM2	0.0600359	-0.00101346
15	16	PALM2	0.060835	-0.00106972
15	17	PALM2	0.061344	-0.00141606
15	18	PALM2	0.0620289	-0.00158656
15	19	PALM2	0.0641207	-0.000350207
15	20	PALM2	0.0677185	0.00239225
15	21	PALM2	0.0739135	0.0077319
15	22	PALM2	0.0860843	0.0190473
15	23	PALM2	0.109338	0.0414454
15	24	PALM2	0.153504	0.0847558
15	25	PALM2	0.235065	0.165461
15	26	PALM2	0.374286	0.303828
15	27	PALM2	0.584239	0.512925
15	28	PALM2	0.845542	0.773372
15	29	PALM2	1.10293	1.0299
15	30	PALM2	1.29873	1.22485
15	31	PALM2	1.42288	1.34814
15	32	PALM2	1.48934	1.41375
15	33	PALM2	1.53029	1.45384
15	34	PALM2	1.55939	1.48209
15	35	PALM2	1.57991	1.50176
15	36	PALM2	1.59543	1.51641
15	37	PALM2	1.60889	1.52902
15	38	PALM2	1.61442	1.5337
15	39	PALM2	1.61914	1.53756
15	40	PALM2	1.62633	1.54389
16	1	PALM2	0.0240209	-0.00300373
16	2	PALM2	0.0251661	-0.00245908
16	3	PALM2	0.0274548	-0.000770894
16	4	PALM2	0.0284854	-0.000340837
16	5	PALM2	0.0298106	0.000383852
16	6	PALM2	0.0309156	0.000888296
16	7	PALM2	0.0313536	0.000725766
16	8	PALM2	0.0315856	0.000357216
16	9	PALM2	0.0319329	0.000103986
16	10	PALM2	0.0327115	0.000282033
16	11	PALM2	0.0332699	0.000239886
16	12	PALM2	0.0334268	-0.000203736
16	13	PALM2	0.0339411	-0.000289924
16	14	PALM2	0.0343351	-0.000496539
16	15	PALM2	0.0345454	-0.00088677
16	16	PALM2	0.0348055	-0.00122715
16	17	PALM2	0.0358415	-0.000791695
16	18	PALM2	0.0365893	-0.000644479
16	19	PALM2	0.0379993	0.000165035
16	20	PALM2	0.0409408	0.00250595
16	21	PALM2	0.0467568	0.00772142
16	22	PALM2	0.0583371	0.0187012
16	23	PALM2	0.0800436	0.0398072
16	24	PALM2	0.121402	0.0805655
16	25	PALM2	0.197527	0.156089
16	26	PALM2	0.32931	0.287272
16	27	PALM2	0.532594	0.489955
16	28	PALM2	0.79469	0.751451
16	29	PALM2	1.06169	1.01785
16	30	PALM2	1.27119	1.22675
16	31	PALM2	1.40101	1.35597
16	32	PALM2	1.47541	1.42977
16	33	PALM2	1.51773	1.47149
16	34	PALM2	1.54807	1.50122
16	35	PALM2	1.56978	1.52234
16	36	PALM2	1.58844	1.54039
16	37	PALM2	1.59882	1.55018
16	38	PALM2	1.60787	1.55863
16	39	PALM2	1.61532	1.56548
16	40	PALM2	1.62108	1.57064
17	1	PALM2	0.0289397	-0.00363205
17	2	PALM2	0.0300162	-0.00318626
17	3	PALM2	0.0328225	-0.00101069
17	4	PALM2	0.0344177	-4.62119e-05
17	5	PALM2	0.0355133	0.000418748
17	6	PALM2	0.0364861	0.000760781
17	7	PALM2	0.0367226	0.000366543
17	8	PALM2	0.037582	0.00059529
17	9	PALM2	0.0382988	0.000681358
17	10	PALM2	0.0386595	0.000411262
17	11	PALM2	0.0389452	6.62511e-05
17	12	PALM2	0.0394559	-5.3708e-05
17	13	PALM2	0.0396809	-0.000459408
17	14	PALM2	0.0400417	-0.000729347
17	15	PALM2	0.0403884	-0.00101342
17	16	PALM2	0.0406564	-0.00137611
17	17	PALM2	0.0416152	-0.00104804
17	18	PALM2	0.0424675	-0.000826414
17	19	PALM2	0.0441914	0.000266712
17	20	PALM2	0.0475518	0.0029964
17	21	PALM2	0.053921	0.00873485
17	22	PALM2	0.0663049	0.0204881
17	23	PALM2	0.0903243	0.0438768
17	24	PALM2	0.136121	0.0890423
17	25	PALM2	0.219842	0.172133
17	26	PALM2	0.363418	0.315078
17	27	PALM2	0.578775	0.529805
17	28	PALM2	0.847251	0.79765
17	29	PALM2	1.10679	1.05656
17	30	PALM2	1.30329	1.25243
17	31	PALM2	1.42428	1.37279
17	32	PALM2	1.49065	1.43852
17	33	PALM2	1.53014	1.47739
17	34	PALM2	1.55928	1.50589
17	35	PALM2	1.57956	1.52555
17	36	PALM2	1.59469	1.54005
17	37	PALM2	1.60323	1.54796
17	38	PALM2	1.61301	1.5571
17	39	PALM2	1.62084	1.5643
17	40	PALM2	1.62616	1.56899
18	1	PALM2	0.0612519	-0.00499057
18	2	PALM2	0.0630125	-0.00426147
18	3	PALM2	0.0660935	-0.00221207
18	4	PALM2	0.0679516	-0.00138552
18	5	PALM2	0.0700918	-0.000276833
18	6	PALM2	0.0720269	0.000626666
18	7	PALM2	0.0735794	0.00114763
18	8	PALM2	0.0749857	0.0015224
18	9	PALM2	0.0756209	0.001126
18	10	PALM2	0.0766799	0.00115348
18	11	PALM2	0.0774795	0.000921534
18	12	PALM2	0.0780632	0.000473721
18	13	PALM2	0.078811	0.00018997
18	14	PALM2	0.0796737	2.10986e-05
18	15	PALM2	0.0802525	-0.000431647
18	16	PALM2	0.0807386	-0.000977108
18	17	PALM2	0.0810189	-0.00172833
18	18	PALM2	0.081958	-0.0018208
18	19	PALM2	0.0842076	-0.000602786
18	20	PALM2	0.0880945	0.00225259
18	21	PALM2	0.0940741	0.00720068
18	22	PALM2	0.106841	0.0189364
18	23	PALM2	0.131632	0.0426958
18	24	PALM2	0.178883	0.0889151
18	25	PALM2	0.264282	0.173282
18	26	PALM2	0.409591	0.31756
18	27	PALM2	0.627873	0.53481
18	28	PALM2	0.894182	0.800087
18	29	PALM2	1.15225	1.05713
18	30	PALM2	1.34594	1.24978
18	31	PALM2	1.46324	1.36605
18	32	PALM2	1.52921	1.43099
18	33	PALM2	1.5698	1.47055
18	34	PALM2	1.59835	1.49807
18	35	PALM2	1.61715	1.51583
18	36	PALM2	1.63174	1.5294
18	37	PALM2	1.64472	1.54134
18	38	PALM2	1.65311	1.5487
18	39	PALM2	1.65956	1.55411
18	40	PALM2	1.6601	1.55363
19	1	ZNF358	0.058516	-0.00486928
19	2	ZNF358	0.0599678	-0.00401439
19	3	ZNF358	0.0627305	-0.00184856
19	4	ZNF358	0.0641244	-0.00105156
19	5	ZNF358	0.0654562	-0.000316683
19	6	ZNF358	0.066579	0.00020919
19	7	ZNF358	0.0673425	0.000375796
19	8	ZNF358	0.0681962	0.000632621
19	9	ZNF358	0.0690868	0.000926311
19	10	ZNF358	0.070018	0.00126064
19	11	ZNF358	0.0703924	0.00103808
19	12	ZNF358	0.0707076	0.000756418
19	13	ZNF358	0.0710012	0.000453078
19	14	ZNF358	0.071394	0.00024901
19	15	ZNF358	0.0721034	0.000361503
19	16	ZNF358	0.0722941	-4.4737e-05
19	17	ZNF358	0.0731751	0.000239372
19	18	ZNF358	0.073412	-0.000120622
19	19	ZNF358	0.0732263	-0.000903235
19	20	ZNF358	0.0733097	-0.00141673
19	21	ZNF358	0.0740367	-0.00128656
19	22	ZNF358	0.0746072	-0.00131295
19	23	ZNF358	0.0757399	-0.000777143
19	24	ZNF358	0.0772913	0.00017728
19	25	ZNF358	0.0801104	0.00239946
19	26	ZNF358	0.085147	0.00683921
19	27	ZNF358	0.093911	0.0150063
19	28	ZNF358	0.109542	0.0300405
19	29	ZNF358	0.137426	0.0573273
19	30	ZNF358	0.188209	0.107514
19	31	ZNF358	0.276624	0.195332
19	32	ZNF358	0.419878	0.337989
19	33	ZNF358	0.617636	0.53515
19	34	ZNF358	0.839476	0.756393
19	35	ZNF358	1.03754	0.953861
19	36	ZNF358	1.18299	1.09871
19	37	ZNF358	1.2701	1.18522
19	38	ZNF358	1.32333	1.23786
19	39	ZNF358	1.3609	1.27483
19	40	ZNF358	1.38861	1.30195
20	1	ZNF358	0.0780044	-0.00684683
20	2	ZNF358	0.0794599	-0.00611964
20	3	ZNF358	0.0832098	-0.00309809
20	4	ZNF358	0.0848344	-0.00220178
20	5	ZNF358	0.0864519	-0.00131254
20	6	ZNF358	0.0884352	-5.75968e-05
20	7	ZNF358	0.0902206	0.000999453
20	8	ZNF358	0.0913718	0.00142235
20	9	ZNF358	0.0925107	0.00183301
20	10	ZNF358	0.0933319	0.00192587
20	11	ZNF358	0.0944243	0.00228996
20	12	ZNF358	0.0944599	0.00159722
20	13	ZNF358	0.095078	0.00148699
20	14	ZNF358	0.0950583	0.00073906
20	15	ZNF358	0.0954675	0.000419875
20	16	ZNF358	0.0958793	0.000103396
20	17	ZNF358	0.0960532	-0.000451056
20	18	ZNF358	0.0960032	-0.00122927
20	19	ZNF358	0.0962998	-0.00166103
20	20	ZNF358	0.0970214	-0.0016677
20	21	ZNF358	0.0983171	-0.00110034
20	22	ZNF358	0.098486	-0.0016598
20	23	ZNF358	0.0995025	-0.00137153
20	24	ZNF358	0.101672	7.005e-05
20	25	ZNF358	0.105254	0.00292352
20	26	ZNF358	0.11165	0.0085906
20	27	ZNF358	0.123478	0.0196905
20	28	ZNF358	0.1448	0.0402847
20	29	ZNF358	0.184887	0.0796431
20	30	ZNF358	0.25556	0.149588
20	31	ZNF358	0.371658	0.264957
20	32	ZNF358	0.547463	0.440034
20	33	ZNF358	0.766667	0.65851
20	34	ZNF358	0.978025	0.869139
20	35	ZNF358	1.14876	1.03914
20	36	ZNF358	1.26491	1.15457
20	37	ZNF358	1.33556	1.22449
20	38	ZNF358	1.37835	1.26655
20	39	ZNF358	1.41087	1.29834
20	40	ZNF358	1.43374	1.32048
21	1	ZNF358	0.0409412	-0.00530589
21	2	ZNF358	0.042189	-0.00470556
21	3	ZNF358	0.0449817	-0.00256033
21	4	ZNF358	0.0465832	-0.00160634
21	5	ZNF358	0.0481698	-0.000667198
21	6	ZNF358	0.0499508	0.000466341
21	7	ZNF358	0.0510682	0.000936275
21	8	ZNF358	0.0513088	0.000529365
21	9	ZNF358	0.0525428	0.00111589
21	10	ZNF358	0.0533061	0.0012317
21	11	ZNF358	0.0542865	0.0015646
21	12	ZNF358	0.0546265	0.00125711
21	13	ZNF358	0.0549599	0.000943059
21	14	ZNF358	0.0553308	0.000666471
21	15	ZNF358	0.0555009	0.000189123
21	16	ZNF358	0.0562096	0.000250296
21	17	ZNF358	0.056479	-0.000127747
21	18	ZNF358	0.0565158	-0.000738419
21	19	ZNF358	0.0569556	-0.000946126
21	20	ZNF358	0.0574244	-0.00112479
21	21	ZNF358	0.0578133	-0.00138335
21	22	ZNF358	0.0586045	-0.0012396
21	23	ZNF358	0.0595944	-0.000897217
21	24	ZNF358	0.0610007	-0.00013839
21	25	ZNF358	0.0640658	0.00227928
21	26	ZNF358	0.0697021	0.00726806
21	27	ZNF358	0.0802034	0.0171219
21	28	ZNF358	0.0990809	0.0353519
21	29	ZNF358	0.133299	0.0689227
21	30	ZNF358	0.193841	0.128817
21	31	ZNF358	0.297689	0.232018
21	32	ZNF358	0.458515	0.392196
21	33	ZNF358	0.669125	0.602159
21	34	ZNF358	0.887526	0.819912
21	35	ZNF358	1.0678	0.999542
21	36	ZNF358	1.19296	1.12405
21	37	ZNF358	1.27248	1.20292
21	38	ZNF358	1.31762	1.24741
21	39	ZNF358	1.34967	1.27882
21	40	ZNF358	1.37354	1.30204
22	1	ZNF358	0.0398922	-0.00323188
22	2	ZNF358	0.0409797	-0.00274949
22	3	ZNF358	0.042919	-0.00141525
22	4	ZNF358	0.0440441	-0.000895215
22	5	ZNF358	0.0454282	-0.000116148
22	6	ZNF358	0.0463915	0.000242125
22	7	ZNF358	0.0471595	0.000405073
22	8	ZNF358	0.0478094	0.000449907
22	9	ZNF358	0.0487181	0.000753519
22	10	ZNF358	0.0497299	0.00116023
22	11	ZNF358	0.050215	0.0010403
22	12	ZNF358	0.050547	0.000767199
22	13	ZNF358	0.0507771	0.000392279
22	14	ZNF358	0.0511979	0.000208082
22	15	ZNF358	0.0520128	0.000417921
22	16	ZNF358	0.0521583	-4.16677e-05
22	17	ZNF358	0.0524585	-0.000346564
22	18	ZNF358	0.052611	-0.000799063
22	19	ZNF358	0.0528404	-0.00117472
22	20	ZNF358	0.0533096	-0.0013106
22	21	ZNF358	0.0539123	-0.00131295
22	22	ZNF358	0.0545502	-0.00128013
22	23	ZNF358	0.0556167	-0.000818671
22	24	ZNF358	0.0576571	0.000616695
22	25	ZNF358	0.0607032	0.00305765
22	26	ZNF358	0.0659511	0.00770051
22	27	ZNF358	0.0753497	0.0164941
22	28	ZNF358	0.0921049	0.0326442
22	29	ZNF358	0.122497	0.0624313
22	30	ZNF358	0.175931	0.115261
22	31	ZNF358	0.267723	0.206448
22	32	ZNF358	0.414558	0.352677
22	33	ZNF358	0.616265	0.55378
22	34	ZNF358	0.836465	0.773374
22	35	ZNF358	1.02841	0.964714
22	36	ZNF358	1.16644	1.10214
22	37	ZNF358	1.25291	1.188
22	38	ZNF358	1.30824	1.24273
22	39	ZNF358	1.34612	1.28
22	40	ZNF358	1.36623	1.29951
23	1	ZNF358	0.0623928	-0.0023654
23	2	ZNF358	0.0631873	-0.00216906
23	3	ZNF358	0.0651309	-0.000823603
23	4	ZNF358	0.0664923	-6.04289e-05
23	5	ZNF358	0.0673744	0.000223583
23	6	ZNF358	0.068092	0.00034299
23	7	ZNF358	0.0690928	0.000745623
23	8	ZNF358	0.0696734	0.000728095
23	9	ZNF358	0.0697903	0.00024688
23	10	ZNF358	0.0700942	-4.73548e-05
23	11	ZNF358	0.0710033	0.000263539
23	12	ZNF358	0.0719984	0.000660465
23	13	ZNF358	0.0718074	-0.000128615
23	14	ZNF358	0.071732	-0.000802174
23	15	ZNF358	0.073088	-4.43648e-05
23	16	ZNF358	0.0733521	-0.000378445
23	17	ZNF358	0.0739806	-0.000348036
23	18	ZNF358	0.0745581	-0.000368701
23	19	ZNF358	0.0746876	-0.000837368
23	20	ZNF358	0.0754416	-0.000681544
23	21	ZNF358	0.0761078	-0.000613457
23	22	ZNF358	0.0766041	-0.00071531
23	23	ZNF358	0.0773605	-0.000557079
23	24	ZNF358	0.0793293	0.000813623
23	25	ZNF358	0.0814956	0.00238168
23	26	ZNF358	0.0861755	0.00646352
23	27	ZNF358	0.0942547	0.0139445
23	28	ZNF358	0.108269	0.0273606
23	29	ZNF358	0.134138	0.0526317
23	30	ZNF358	0.180265	0.0981603
23	31	ZNF358	0.259328	0.176626
23	32	ZNF358	0.388901	0.3056
23	33	ZNF358	0.575097	0.491198
23	34	ZNF358	0.790436	0.705939
23	35	ZNF358	0.989651	0.904555
23	36	ZNF358	1.13901	1.05332
23	37	ZNF358	1.23694	1.15065
23	38	ZNF358	1.29683	1.20994
23	39	ZNF358	1.33383	1.24634
23	40	ZNF358	1.35627	1.26818
24	1	ZNF358	0.0347256	-0.000574643
24	2	ZNF358	0.0351213	-0.000552995
24	3	ZNF358	0.0355812	-0.000467212
24	4	ZNF358	0.0369356	0.000513124
24	5	ZNF358	0.0373852	0.000588588
24	6	ZNF358	0.0372659	9.51997e-05
24	7	ZNF358	0.0376732	0.000128385
24	8	ZNF358	0.0382686	0.000349664
24	9	ZNF358	0.0385125	0.000219514
24	10	ZNF358	0.0388216	0.000154445
24	11	ZNF358	0.0393327	0.000291484
24	12	ZNF358	0.039559	0.000143635
24	13	ZNF358	0.0395697	-0.000219726
24	14	ZNF358	0.0398325	-0.000331014
24	15	ZNF358	0.0398682	-0.000669404
24	16	ZNF358	0.0406415	-0.000270265
24	17	ZNF358	0.0409231	-0.000362756
24	18	ZNF358	0.041196	-0.000463912
24	19	ZNF358	0.0412327	-0.000801375
24	20	ZNF358	0.0420064	-0.000401706
24	21	ZNF358	0.0420179	-0.000764333
24	22	ZNF358	0.0422208	-0.000935491
24	23	ZNF358	0.0432886	-0.000241871
24	24	ZNF358	0.0445129	0.000608419
24	25	ZNF358	0.0471152	0.00283661
24	26	ZNF358	0.0516446	0.00699192
24	27	ZNF358	0.0586466	0.0136198
24	28	ZNF358	0.0712243	0.0258234
24	29	ZNF358	0.0943257	0.0485507
24	30	ZNF358	0.135343	0.0891937
24	31	ZNF358	0.207255	0.160732
24	32	ZNF358	0.32682	0.279923
24	33	ZNF358	0.503142	0.455871
24	34	ZNF358	0.711006	0.663361
24	35	ZNF358	0.906939	0.858919
24	36	ZNF358	1.05574	1.00734
24	37	ZNF358	1.15299	1.10422
24	38	ZNF358	1.21515	1.166
24	39	ZNF358	1.25677	1.20725
24	40	ZNF358	1.28552	1.23563
25	1
25	2
25	3
25	4
25	5
25	6
25	7
25	8
25	9
25	10
25	11
25	12
25	13
25	14
25	15
25	16
25	17
25	18
25	19
25	20
25	21
25	22
25	23
25	24
25	25
25	26
25	27
25	28
25	29
25	30
25	31
25	32
25	33
25	34
25	35
25	36
25	37
25	38
25	39
25	40
26	1
26	2
26	3
26	4
26	5
26	6
26	7
26	8
26	9
26	10
26	11
26	12
26	13
26	14
26	15
26	16
26	17
26	18
26	19
26	20
26	21
26	22
26	23
26	24
26	25
26	26
26	27
26	28
26	29
26	30
26	31
26	32
26	33
26	34
26	35
26	36
26	37
26	38
26	39
26	40
27	1
27	2
27	3
27	4
27	5
27	6
27	7
27	8
27	9
27	10
27	11
27	12
27	13
27	14
27	15
27	16
27	17
27	18
27	19
27	20
27	21
27	22
27	23
27	24
27	25
27	26
27	27
27	28
27	29
27	30
27	31
27	32
27	33
27	34
27	35
27	36
27	37
27	38
27	39
27	40
28	1
28	2
28	3
28	4
28	5
28	6
28	7
28	8
28	9
28	10
28	11
28	12
28	13
28	14
28	15
28	16
28	17
28	18
28	19
28	20
28	21
28	22
28	23
28	24
28	25
28	26
28	27
28	28
28	29
28	30
28	31
28	32
28	33
28	34
28	35
28	36
28	37
28	38
28	39
28	40
29	1
29	2
29	3
29	4
29	5
29	6
29	7
29	8
29	9
29	10
29	11
29	12
29	13
29	14
29	15
29	16
29	17
29	18
29	19
29	20
29	21
29	22
29	23
29	24
29	25
29	26
29	27
29	28
29	29
29	30
29	31
29	32
29	33
29	34
29	35
29	36
29	37
29	38
29	39
29	40
30	1
30	2
30	3
30	4
30	5
30	6
30	7
30	8
30	9
30	10
30	11
30	12
30	13
30	14
30	15
30	16
30	17
30	18
30	19
30	20
30	21
30	22
30	23
30	24
30	25
30	26
30	27
30	28
30	29
30	30
30	31
30	32
30	33
30	34
30	35
30	36
30	37
30	38
30	39
30	40
31	1
31	2
31	3
31	4
31	5
31	6
31	7
31	8
31	9
31	10
31	11
31	12
31	13
31	14
31	15
31	16
31	17
31	18
31	19
31	20
31	21
31	22
31	23
31	24
31	25
31	26
31	27
31	28
31	29
31	30
31	31
31	32
31	33
31	34
31	35
31	36
31	37
31	38
31	39
31	40
32	1
32	2
32	3
32	4
32	5
32	6
32	7
32	8
32	9
32	10
32	11
32	12
32	13
32	14
32	15
32	16
32	17
32	18
32	19
32	20
32	21
32	22
32	23
32	24
32	25
32	26
32	27
32	28
32	29
32	30
32	31
32	32
32	33
32	34
32	35
32	36
32	37
32	38
32	39
32	40
33	1
33	2
33	3
33	4
33	5
33	6
33	7
33	8
33	9
33	10
33	11
33	12
33	13
33	14
33	15
33	16
33	17
33	18
33	19
33	20
33	21
33	22
33	23
33	24
33	25
33	26
33	27
33	28
33	29
33	30
33	31
33	32
33	33
33	34
33	35
33	36
33	37
33	38
33	39
33	40
34	1
34	2
34	3
34	4
34	5
34	6
34	7
34	8
34	9
34	10
34	11
34	12
34	13
34	14
34	15
34	16
34	17
34	18
34	19
34	20
34	21
34	22
34	23
34	24
34	25
34	26
34	27
34	28
34	29
34	30
34	31
34	32
34	33
34	34
34	35
34	36
34	37
34	38
34	39
34	40
35	1
35	2
35	3
35	4
35	5
35	6
35	7
35	8
35	9
35	10
35	11
35	12
35	13
35	14
35	15
35	16
35	17
35	18
35	19
35	20
35	21
35	22
35	23
35	24
35	25
35	26
35	27
35	28
35	29
35	30
35	31
35	32
35	33
35	34
35	35
35	36
35	37
35	38
35	39
35	40
36	1
36	2
36	3
36	4
36	5
36	6
36	7
36	8
36	9
36	10
36	11
36	12
36	13
36	14
36	15
36	16
36	17
36	18
36	19
36	20
36	21
36	22
36	23
36	24
36	25
36	26
36	27
36	28
36	29
36	30
36	31
36	32
36	33
36	34
36	35
36	36
36	37
36	38
36	39
36	40
37	1	MAGEA6	0.099051	-0.00300502
37	2	MAGEA6	0.100033	-0.00241696
37	3	MAGEA6	0.102073	-0.000771371
37	4	MAGEA6	0.102913	-0.000325735
37	5	MAGEA6	0.103603	-2.96764e-05
37	6	MAGEA6	0.104237	0.000210033
37	7	MAGEA6	0.104807	0.000386301
37	8	MAGEA6	0.105646	0.000830715
37	9	MAGEA6	0.107146	0.0019375
37	10	MAGEA6	0.106898	0.00129507
37	11	MAGEA6	0.106314	0.000316854
37	12	MAGEA6	0.106432	4.03504e-05
37	13	MAGEA6	0.106517	-0.000268243
37	14	MAGEA6	0.106787	-0.000392398
37	15	MAGEA6	0.106935	-0.000638854
37	16	MAGEA6	0.106575	-0.00139308
37	17	MAGEA6	0.106597	-0.00176446
37	18	MAGEA6	0.10721	-0.00154555
37	19	MAGEA6	0.107726	-0.00142373
37	20	MAGEA6	0.10845	-0.00109433
37	21	MAGEA6	0.109449	-0.000489197
37	22	MAGEA6	0.111411	0.00107865
37	23	MAGEA6	0.114768	0.00404115
37	24	MAGEA6	0.121699	0.0105784
37	25	MAGEA6	0.135663	0.0241487
37	26	MAGEA6	0.162044	0.0501353
37	27	MAGEA6	0.210464	0.0981608
37	28	MAGEA6	0.294214	0.181517
37	29	MAGEA6	0.426088	0.312997
37	30	MAGEA6	0.605629	0.492144
37	31	MAGEA6	0.808079	0.694199
37	32	MAGEA6	0.993954	0.879681
37	33	MAGEA6	1.13555	1.02088
37	34	MAGEA6	1.22585	1.11079
37	35	MAGEA6	1.28736	1.1719
37	36	MAGEA6	1.33492	1.21907
37	37	MAGEA6	1.37155	1.2553
37	38	MAGEA6	1.39952	1.28288
37	39	MAGEA6	1.42057	1.30354
37	40	MAGEA6	1.43742	1.32
38	1	MAGEA6	0.0891317	-0.00110982
38	2	MAGEA6	0.0895296	-0.000889142
38	3	MAGEA6	0.0903983	-0.000197596
38	4	MAGEA6	0.0909223	0.000149316
38	5	MAGEA6	0.0913951	0.000444901
38	6	MAGEA6	0.0916766	0.000549274
38	7	MAGEA6	0.0918857	0.000581175
38	8	MAGEA6	0.0918331	0.000351427
38	9	MAGEA6	0.0916388	-2.0091e-05
38	10	MAGEA6	0.0918331	-2.88228e-06
38	11	MAGEA6	0.0919557	-5.74599e-05
38	12	MAGEA6	0.0920113	-0.000178996
38	13	MAGEA6	0.092023	-0.000344445
38	14	MAGEA6	0.0918732	-0.000671439
38	15	MAGEA6	0.0919365	-0.000785271
38	16	MAGEA6	0.0924274	-0.000471611
38	17	MAGEA6	0.092336	-0.000740147
38	18	MAGEA6	0.0923171	-0.000936203
38	19	MAGEA6	0.092839	-0.000591467
38	20	MAGEA6	0.0932164	-0.000391242
38	21	MAGEA6	0.0943804	0.000595652
38	22	MAGEA6	0.0966791	0.00271711
38	23	MAGEA6	0.100213	0.00607393
38	24	MAGEA6	0.107658	0.0133416
38	25	MAGEA6	0.121465	0.0269718
38	26	MAGEA6	0.147835	0.0531647
38	27	MAGEA6	0.196557	0.101709
38	28	MAGEA6	0.280421	0.185396
38	29	MAGEA6	0.412623	0.317421
38	30	MAGEA6	0.592718	0.497339
38	31	MAGEA6	0.797077	0.701521
38	32	MAGEA6	0.983434	0.8877
38	33	MAGEA6	1.1215	1.02559
38	34	MAGEA6	1.21218	1.1161
38	35	MAGEA6	1.27728	1.18101
38	36	MAGEA6	1.32754	1.2311
38	37	MAGEA6	1.3657	1.26908
38	38	MAGEA6	1.39277	1.29598
38	39	MAGEA6	1.41455	1.31758
38	40	MAGEA6	1.42971	1.33256
39	1	MAGEA6	0.109212	-0.00259435
39	2	MAGEA6	0.110212	-0.00201952
39	3	MAGEA6	0.111933	-0.000724501
39	4	MAGEA6	0.113038	-4.52466e-05
39	5	MAGEA6	0.113734	0.000224449
39	6	MAGEA6	0.114533	0.000597678
39	7	MAGEA6	0.115265	0.000904694
39	8	MAGEA6	0.115606	0.000819027
39	9	MAGEA6	0.115869	0.0006565
39	10	MAGEA6	0.116259	0.000621266
39	11	MAGEA6	0.116111	4.75564e-05
39	12	MAGEA6	0.116276	-0.000213534
39	13	MAGEA6	0.116808	-0.000107669
39	14	MAGEA6	0.11745	0.000109358
39	15	MAGEA6	0.117307	-0.000459538
39	16	MAGEA6	0.117128	-0.00106457
39	17	MAGEA6	0.116773	-0.00184536
39	18	MAGEA6	0.116993	-0.00205103
39	19	MAGEA6	0.1177	-0.0017701
39	20	MAGEA6	0.119093	-0.000802244
39	21	MAGEA6	0.120179	-0.000142264
39	22	MAGEA6	0.121966	0.00121905
39	23	MAGEA6	0.125199	0.00402648
39	24	MAGEA6	0.132094	0.010495
39	25	MAGEA6	0.146056	0.0240312
39	26	MAGEA6	0.17312	0.0506697
39	27	MAGEA6	0.224597	0.101721
39	28	MAGEA6	0.303786	0.180484
39	29	MAGEA6	0.432382	0.308654
39	30	MAGEA6	0.611226	0.487073
39	31	MAGEA6	0.813135	0.688556
39	32	MAGEA6	1.00032	0.875316
39	33	MAGEA6	1.13899	1.01356
39	34	MAGEA6	1.23119	1.10534
39	35	MAGEA6	1.29553	1.16925
39	36	MAGEA6	1.34467	1.21796
39	37	MAGEA6	1.3835	1.25637
39	38	MAGEA6	1.41199	1.28443
39	39	MAGEA6	1.43421	1.30623
39	40	MAGEA6	1.4504	1.32199
40	1	MAGEA6	0.112733	-0.00416001
40	2	MAGEA6	0.113743	-0.0034044
40	3	MAGEA6	0.116289	-0.00111247
40	4	MAGEA6	0.117474	-0.0001823
40	5	MAGEA6	0.118676	0.000765617
40	6	MAGEA6	0.118821	0.000655641
40	7	MAGEA6	0.119034	0.000614077
40	8	MAGEA6	0.119041	0.000366623
40	9	MAGEA6	0.119318	0.000389268
40	10	MAGEA6	0.119364	0.000180266
40	11	MAGEA6	0.119345	-9.32941e-05
40	12	MAGEA6	0.119598	-9.48936e-05
40	13	MAGEA6	0.119596	-0.000351616
40	14	MAGEA6	0.119982	-0.000219641
40	15	MAGEA6	0.119722	-0.000734832
40	16	MAGEA6	0.120118	-0.000593164
40	17	MAGEA6	0.120744	-0.000221922
40	18	MAGEA6	0.121129	-9.16683e-05
40	19	MAGEA6	0.120813	-0.000661486
40	20	MAGEA6	0.120871	-0.000858619
40	21	MAGEA6	0.122107	0.00012267
40	22	MAGEA6	0.12436	0.00212174
40	23	MAGEA6	0.127989	0.00549629
40	24	MAGEA6	0.134945	0.0121976
40	25	MAGEA6	0.148376	0.0253742
40	26	MAGEA6	0.174022	0.0507652
40	27	MAGEA6	0.221592	0.098081
40	28	MAGEA6	0.303851	0.180085
40	29	MAGEA6	0.43401	0.309989
40	30	MAGEA6	0.612301	0.488026
40	31	MAGEA6	0.816301	0.691772
40	32	MAGEA6	1.00168	0.876894
40	33	MAGEA6	1.13796	1.01292
40	34	MAGEA6	1.22988	1.10459
40	35	MAGEA6	1.2964	1.17085
40	36	MAGEA6	1.34619	1.22039
40	37	MAGEA6	1.38497	1.25892
40	38	MAGEA6	1.41294	1.28663
40	39	MAGEA6	1.43604	1.30948
40	40	MAGEA6	1.45307	1.32625
41	1	MAGEA6	0.114858	-0.00295601
41	2	MAGEA6	0.116035	-0.002158
41	3	MAGEA6	0.117427	-0.00114514
41	4	MAGEA6	0.118508	-0.00044383
41	5	MAGEA6	0.119669	0.000338262
41	6	MAGEA6	0.119961	0.000250887
41	7	MAGEA6	0.120501	0.000410818
41	8	MAGEA6	0.121168	0.000699243
41	9	MAGEA6	0.121502	0.000653442
41	10	MAGEA6	0.121625	0.000397326
41	11	MAGEA6	0.122141	0.000533602
41	12	MAGEA6	0.12258	0.000593882
41	13	MAGEA6	0.122724	0.00035789
41	14	MAGEA6	0.12284	9.483e-05
41	15	MAGEA6	0.122561	-0.000563208
41	16	MAGEA6	0.122911	-0.000593318
41	17	MAGEA6	0.123291	-0.000592285
41	18	MAGEA6	0.123314	-0.000948604
41	19	MAGEA6	0.123356	-0.00128554
41	20	MAGEA6	0.123653	-0.00136863
41	21	MAGEA6	0.124498	-0.000902827
41	22	MAGEA6	0.126028	0.0002476
41	23	MAGEA6	0.129425	0.0032656
41	24	MAGEA6	0.136896	0.0103571
41	25	MAGEA6	0.149289	0.0223707
41	26	MAGEA6	0.173344	0.0460472
41	27	MAGEA6	0.217917	0.0902404
41	28	MAGEA6	0.295867	0.167811
41	29	MAGEA6	0.419936	0.291501
41	30	MAGEA6	0.593339	0.464524
41	31	MAGEA6	0.793552	0.664357
41	32	MAGEA6	0.979594	0.850021
41	33	MAGEA6	1.124	0.994045
41	34	MAGEA6	1.21628	1.08595
41	35	MAGEA6	1.2819	1.15118
41	36	MAGEA6	1.33268	1.20159
41	37	MAGEA6	1.36855	1.23708
41	38	MAGEA6	1.39632	1.26447
41	39	MAGEA6	1.41861	1.28638
41	40	MAGEA6	1.43363	1.30102
42	1	MAGEA6	0.0958967	-0.00473972
42	2	MAGEA6	0.0970197	-0.00378853
42	3	MAGEA6	0.100212	-0.000767876
42	4	MAGEA6	0.10119	3.80342e-05
42	5	MAGEA6	0.101868	0.000544334
42	6	MAGEA6	0.102198	0.000702006
42	7	MAGEA6	0.102381	0.000713528
42	8	MAGEA6	0.102393	0.000553746
42	9	MAGEA6	0.102241	0.000229939
42	10	MAGEA6	0.102437	0.000253851
42	11	MAGEA6	0.103124	0.000769218
42	12	MAGEA6	0.102887	0.000359894
42	13	MAGEA6	0.102266	-0.000432025
42	14	MAGEA6	0.102159	-0.00071121
42	15	MAGEA6	0.102374	-0.000667852
42	16	MAGEA6	0.102253	-0.000960508
42	17	MAGEA6	0.101934	-0.00145207
42	18	MAGEA6	0.102089	-0.00146821
42	19	MAGEA6	0.102517	-0.00121235
42	20	MAGEA6	0.102962	-0.000939291
42	21	MAGEA6	0.103578	-0.000495487
42	22	MAGEA6	0.105216	0.000970708
42	23	MAGEA6	0.108388	0.00397163
42	24	MAGEA6	0.114058	0.00946943
42	25	MAGEA6	0.125143	0.0203829
42	26	MAGEA6	0.146109	0.0411768
42	27	MAGEA6	0.185895	0.0807903
42	28	MAGEA6	0.255715	0.150439
42	29	MAGEA6	0.36903	0.263583
42	30	MAGEA6	0.53318	0.42756
42	31	MAGEA6	0.732682	0.62689
42	32	MAGEA6	0.927265	0.821302
42	33	MAGEA6	1.08365	0.977513
42	34	MAGEA6	1.1904	1.08409
42	35	MAGEA6	1.26216	1.15568
42	36	MAGEA6	1.31682	1.21017
42	37	MAGEA6	1.3586	1.25178
42	38	MAGEA6	1.38752	1.28052
42	39	MAGEA6	1.41242	1.30525
42	40	MAGEA6	1.42689	1.31956
43	1	ADM	0.0556592	-0.00316207
43	2	ADM	0.0566223	-0.00287511
43	3	ADM	0.0587093	-0.00146424
43	4	ADM	0.0602606	-0.000589095
43	5	ADM	0.0615732	4.73564e-05
43	6	ADM	0.0628194	0.000617416
43	7	ADM	0.0638656	0.000987487
43	8	ADM	0.0646721	0.00111788
43	9	ADM	0.0648703	0.000639896
43	10	ADM	0.0654467	0.000540155
43	11	ADM	0.0657477	0.000165056
43	12	ADM	0.0665118	0.000253025
43	13	ADM	0.0669369	1.99351e-06
43	14	ADM	0.0668306	-0.000780518
43	15	ADM	0.0674095	-0.000877696
43	16	ADM	0.0679073	-0.00105602
43	17	ADM	0.0687472	-0.000892253
43	18	ADM	0.0696347	-0.000680909
43	19	ADM	0.0710736	8.17994e-05
43	20	ADM	0.0735566	0.00188867
43	21	ADM	0.0777303	0.00538628
43	22	ADM	0.0863847	0.0133645
43	23	ADM	0.104439	0.0307422
43	24	ADM	0.138265	0.0638922
43	25	ADM	0.199146	0.124098
43	26	ADM	0.307026	0.231302
43	27	ADM	0.477233	0.400832
43	28	ADM	0.7027	0.625623
43	29	ADM	0.937608	0.859855
43	30	ADM	1.12899	1.05056
43	31	ADM	1.2514	1.17229
43	32	ADM	1.32269	1.24291
43	33	ADM	1.3652	1.28475
43	34	ADM	1.39389	1.31276
43	35	ADM	1.41781	1.336
43	36	ADM	1.4377	1.35521
43	37	ADM	1.45234	1.36917
43	38	ADM	1.46403	1.38019
43	39	ADM	1.47391	1.3894
43	40	ADM	1.48037	1.39518
44	1	ADM	0.0905564	-0.0027158
44	2	ADM	0.0908507	-0.00313915
44	3	ADM	0.0924903	-0.0022172
44	4	ADM	0.0940619	-0.00136333
44	5	ADM	0.0962608	0.00011798
44	6	ADM	0.0975769	0.000716458
44	7	ADM	0.098582	0.00100384
44	8	ADM	0.0990932	0.000797405
44	9	ADM	0.0998848	0.000871429
44	10	ADM	0.100671	0.000939611
44	11	ADM	0.101357	0.000907814
44	12	ADM	0.10196	0.000793808
44	13	ADM	0.102285	0.000401187
44	14	ADM	0.102163	-0.000438611
44	15	ADM	0.102923	-0.000396647
44	16	ADM	0.103232	-0.000804825
44	17	ADM	0.104208	-0.000546727
44	18	ADM	0.105011	-0.000461378
44	19	ADM	0.105363	-0.000827036
44	20	ADM	0.107414	0.000506218
44	21	ADM	0.111753	0.00412794
44	22	ADM	0.119517	0.0111741
44	23	ADM	0.135356	0.0262958
44	24	ADM	0.164604	0.0548263
44	25	ADM	0.219663	0.109167
44	26	ADM	0.316792	0.205578
44	27	ADM	0.473392	0.361461
44	28	ADM	0.688282	0.575634
44	29	ADM	0.924743	0.811377
44	30	ADM	1.12381	1.00973
44	31	ADM	1.26002	1.14522
44	32	ADM	1.33908	1.22356
44	33	ADM	1.38778	1.27155
44	34	ADM	1.42349	1.30654
44	35	ADM	1.44708	1.32941
44	36	ADM	1.46441	1.34602
44	37	ADM	1.4804	1.36129
44	38	ADM	1.49207	1.37225
44	39	ADM	1.50164	1.38109
44	40	ADM	1.50832	1.38706
45	1	ADM	0.050342	-0.00103958
45	2	ADM	0.05112	-0.000805094
45	3	ADM	0.0523595	-0.000109058
45	4	ADM	0.0531739	0.000161866
45	5	ADM	0.0538156	0.000260126
45	6	ADM	0.0544057	0.000306818
45	7	ADM	0.054763	0.000120586
45	8	ADM	0.055151	-3.4805e-05
45	9	ADM	0.055935	0.000205754
45	10	ADM	0.0562446	-2.81691e-05
45	11	ADM	0.0568141	-2.08965e-06
45	12	ADM	0.0572126	-0.000147038
45	13	ADM	0.0575866	-0.000316525
45	14	ADM	0.0581411	-0.000305526
45	15	ADM	0.0584558	-0.000534275
45	16	ADM	0.0589108	-0.000622659
45	17	ADM	0.0596044	-0.000472553
45	18	ADM	0.0604343	-0.00018615
45	19	ADM	0.061295	0.00013115
45	20	ADM	0.0632799	0.00157255
45	21	ADM	0.0676878	0.00543698
45	22	ADM	0.0759836	0.0131894
45	23	ADM	0.0922319	0.0288942
45	24	ADM	0.122649	0.0587674
45	25	ADM	0.180985	0.116561
45	26	ADM	0.28397	0.219001
45	27	ADM	0.44662	0.381109
45	28	ADM	0.665701	0.599646
45	29	ADM	0.90034	0.833741
45	30	ADM	1.09348	1.02634
45	31	ADM	1.22266	1.15498
45	32	ADM	1.29517	1.22694
45	33	ADM	1.33899	1.27022
45	34	ADM	1.36619	1.29687
45	35	ADM	1.39191	1.32205
45	36	ADM	1.41471	1.34431
45	37	ADM	1.43171	1.36076
45	38	ADM	1.44177	1.37028
45	39	ADM	1.45356	1.38152
45	40	ADM	1.4604	1.38783
46	1	ADM	0.176207	-0.00432176
46	2	ADM	0.177087	-0.00482571
46	3	ADM	0.180309	-0.00298702
46	4	ADM	0.183517	-0.00116243
46	5	ADM	0.185463	-0.000600085
46	6	ADM	0.187753	0.000306467
46	7	ADM	0.189939	0.00110887
46	8	ADM	0.191746	0.00153176
46	9	ADM	0.193146	0.00154782
46	10	ADM	0.194852	0.00187107
46	11	ADM	0.195751	0.00138552
46	12	ADM	0.196328	0.000579545
46	13	ADM	0.19765	0.000517894
46	14	ADM	0.198966	0.000450461
46	15	ADM	0.199592	-0.000308028
46	16	ADM	0.200071	-0.00121228
46	17	ADM	0.201157	-0.00150968
46	18	ADM	0.202261	-0.00178959
46	19	ADM	0.204043	-0.00139142
46	20	ADM	0.206489	-0.000328393
46	21	ADM	0.210191	0.00198951
46	22	ADM	0.218251	0.00866619
46	23	ADM	0.233923	0.0229547
46	24	ADM	0.263598	0.0512456
46	25	ADM	0.31806	0.104324
46	26	ADM	0.41468	0.199561
46	27	ADM	0.569278	0.352775
46	28	ADM	0.780729	0.562842
46	29	ADM	1.0073	0.788034
46	30	ADM	1.19281	0.972156
46	31	ADM	1.3189	1.09686
46	32	ADM	1.3941	1.17068
46	33	ADM	1.43412	1.20931
46	34	ADM	1.46294	1.23675
46	35	ADM	1.48816	1.26058
46	36	ADM	1.50691	1.27795
46	37	ADM	1.51423	1.28389
46	38	ADM	1.52762	1.2959
46	39	ADM	1.53883	1.30573
46	40	ADM	1.54671	1.31222
47	1	ADM	0.0395256	-6.63302e-05
47	2	ADM	0.0398947	-9.00174e-06
47	3	ADM	0.040726	0.000510527
47	4	ADM	0.0409713	0.000444131
47	5	ADM	0.0410448	0.000205851
47	6	ADM	0.0414555	0.000304753
47	7	ADM	0.0418326	0.000370154
47	8	ADM	0.0418749	0.000100704
47	9	ADM	0.0416493	-0.000436699
47	10	ADM	0.0417992	-0.000598503
47	11	ADM	0.0425257	-0.000183811
47	12	ADM	0.0426249	-0.000396354
47	13	ADM	0.0430504	-0.000282613
47	14	ADM	0.0430884	-0.000556363
47	15	ADM	0.0433895	-0.000566954
47	16	ADM	0.0436165	-0.000651741
47	17	ADM	0.0437597	-0.000820262
47	18	ADM	0.0444141	-0.000477577
47	19	ADM	0.0458316	0.000628164
47	20	ADM	0.0479218	0.00240659
47	21	ADM	0.0523198	0.00649286
47	22	ADM	0.060573	0.0144343
47	23	ADM	0.0760598	0.0296093
47	24	ADM	0.106271	0.0595092
47	25	ADM	0.16267	0.115596
47	26	ADM	0.262217	0.214831
47	27	ADM	0.4205	0.372802
47	28	ADM	0.631709	0.5837
47	29	ADM	0.857417	0.809096
47	30	ADM	1.04279	0.994162
47	31	ADM	1.16256	1.11362
47	32	ADM	1.23364	1.18438
47	33	ADM	1.27858	1.22901
47	34	ADM	1.31093	1.26105
47	35	ADM	1.339	1.2888
47	36	ADM	1.36159	1.31109
47	37	ADM	1.37774	1.32693
47	38	ADM	1.38922	1.33809
47	39	ADM	1.39652	1.34508
47	40	ADM	1.40268	1.35093
48	1	ADM	0.034629	-0.000459784
48	2	ADM	0.0350111	-0.00061682
48	3	ADM	0.0358078	-0.00035935
48	4	ADM	0.0365604	-0.000145942
48	5	ADM	0.0377126	0.00046707
48	6	ADM	0.0383697	0.000584968
48	7	ADM	0.038458	0.000133985
48	8	ADM	0.0389508	8.7624e-05
48	9	ADM	0.0396543	0.000251925
48	10	ADM	0.0400646	0.000123034
48	11	ADM	0.0405828	0.00010202
48	12	ADM	0.0410153	-4.73546e-06
48	13	ADM	0.0411586	-0.000400644
48	14	ADM	0.0417873	-0.00031111
48	15	ADM	0.042058	-0.000579625
48	16	ADM	0.042594	-0.000582847
48	17	ADM	0.0428449	-0.000871128
48	18	ADM	0.0432814	-0.000973811
48	19	ADM	0.0448295	3.50163e-05
48	20	ADM	0.0477772	0.00244355
48	21	ADM	0.0525589	0.00668608
48	22	ADM	0.0612635	0.0148514
48	23	ADM	0.0784933	0.0315421
48	24	ADM	0.111097	0.063607
48	25	ADM	0.171757	0.123727
48	26	ADM	0.277336	0.228767
48	27	ADM	0.44199	0.392882
48	28	ADM	0.659884	0.610237
48	29	ADM	0.886759	0.836573
48	30	ADM	1.06789	1.01716
48	31	ADM	1.18557	1.1343
48	32	ADM	1.25324	1.20144
48	33	ADM	1.29384	1.24149
48	34	ADM	1.32433	1.27144
48	35	ADM	1.34766	1.29424
48	36	ADM	1.36675	1.31279
48	37	ADM	1.37787	1.32337
48	38	ADM	1.38683	1.33179
48	39	ADM	1.39528	1.3397
48	40	ADM	1.4014	1.34528
49	1
49	2
49	3
49	4
49	5
49	6
49	7
49	8
49	9
49	10
49	11
49	12
49	13
49	14
49	15
49	16
49	17
49	18
49	19
49	20
49	21
49	22
49	23
49	24
49	25
49	26
49	27
49	28
49	29
49	30
49	31
49	32
49	33
49	34
49	35
49	36
49	37
49	38
49	39
49	40
50	1
50	2
50	3
50	4
50	5
[truncated: 13,395 more rows]

## Sheet: Results
Block Type	384-Well Block
Calibration Background is expired	Yes
Calibration Background performed on	10-12-2018 11:47:46 PDT
Calibration FAM is expired	Yes
Calibration FAM performed on	10-23-2018 10:23:19 PDT
Calibration MELTDOCTOR is expired	Yes
Calibration MELTDOCTOR performed on	09-26-2017 21:22:46 PDT
Calibration NED is expired	Yes
Calibration NED performed on	10-23-2018 10:33:14 PDT
Calibration ROI is expired	Yes
Calibration ROI performed on	10-12-2018 09:37:21 PDT
Calibration ROX is expired	Yes
Calibration ROX performed on	10-23-2018 10:07:21 PDT
Calibration SYBR is expired	Yes
Calibration SYBR performed on	10-23-2018 09:57:53 PDT
Calibration TAMRA is expired	Yes
Calibration TAMRA performed on	10-23-2018 10:45:25 PDT
Calibration Uniformity is expired	Yes
Calibration Uniformity performed on	10-12-2018 10:06:59 PDT
Calibration VIC is expired	Yes
Calibration VIC performed on	10-23-2018 10:54:25 PDT
Chemistry	SYBR_GREEN
Date Created	10-12-2020 12:11:38 PDT
Experiment File Name	D:\NZZ\2020-10-12 101128.eds
Experiment Name	2020-10-12 101128
Experiment Run End Time	10-12-2020 04:51:15 PDT
Experiment Type	Comparative Cт (ΔΔCт)
Instrument Name	285880860
Instrument Serial Number	285880860
Instrument Type	QuantStudio 12K Flex
Passive Reference	ROX
Quantification Cycle Method	Ct
Signal Smoothing On	true
Stage/ Cycle where Analysis is performed	Stage 2, Step 2
Well	Well Position	Omit	Sample Name	Target Name	Task	Reporter	Quencher	RQ	RQ Min	RQ Max	CT	Ct Mean	Ct SE	Quantity	Delta Ct Mean	Delta Ct SE	Delta Delta Ct	Automatic Ct Threshold	Ct Threshold	Automatic Baseline	Baseline Start	Baseline End	Efficiency	Comments	Amp Score	Cq Conf	Tm1	Tm2	Tm3	MTP	HIGHSD	THOLDFAIL
13	A13	false	Vec	PALM2	UNKNOWN	SYBR	None	1	0.93686	1.0674	25.027	25.058	0.0218608		8.20924	0.0338905	0	true	0.175066	true	3	20			1.33162	0.969753	80.8499			N	N	N
14	A14	false	Vec	PALM2	UNKNOWN	SYBR	None	1	0.93686	1.0674	25.1	25.058	0.0218608		8.20924	0.0338905	0	true	0.175066	true	3	20			1.33219	0.973673	80.8499			N	N	N
15	A15	false	Vec	PALM2	UNKNOWN	SYBR	None	1	0.93686	1.0674	25.046	25.058	0.0218608		8.20924	0.0338905	0	true	0.175066	true	3	20			1.33243	0.961382	80.8499			N	N	N
16	A16	false	HBx	PALM2	UNKNOWN	SYBR	None	1.07894	0.91155	1.27708	25.146	25.0336	0.0562561		8.09962	0.0876031	-0.109619	true	0.175066	true	3	20			1.33648	0.972062	80.8499			N	N	N
17	A17	false	HBx	PALM2	UNKNOWN	SYBR	None	1.07894	0.91155	1.27708	24.984	25.0336	0.0562561		8.09962	0.0876031	-0.109619	true	0.175066	true	3	20			1.33602	0.97455	80.8499			N	N	N
18	A18	false	HBx	PALM2	UNKNOWN	SYBR	None	1.07894	0.91155	1.27708	24.971	25.0336	0.0562561		8.09962	0.0876031	-0.109619	true	0.175066	true	3	20			1.3352	0.963478	80.8499			N	N	N
37	B13	false	Vec	MAGEA6	UNKNOWN	SYBR	None	1	0.944933	1.05828	27.607	27.5929	0.0139844		10.7441	0.0294318	0	true	0.145315	true	3	23			1.27495	0.978382	85.606			N	N	N
38	B14	false	Vec	MAGEA6	UNKNOWN	SYBR	None	1	0.944933	1.05828	27.565	27.5929	0.0139844		10.7441	0.0294318	0	true	0.145315	true	3	22			1.27477	0.985947	85.606			N	N	N
39	B15	false	Vec	MAGEA6	UNKNOWN	SYBR	None	1	0.944933	1.05828	27.606	27.5929	0.0139844		10.7441	0.0294318	0	true	0.145315	true	3	23			1.27407	0.977833	85.606			N	N	N
40	B16	false	HBx	MAGEA6	UNKNOWN	SYBR	None	0.940591	0.755735	1.17066	27.619	27.7664	0.0917529		10.8325	0.113702	0.0883611	true	0.145315	true	3	22			1.27326	0.97826	85.606			N	N	N
41	B17	false	HBx	MAGEA6	UNKNOWN	SYBR	None	0.940591	0.755735	1.17066	27.746	27.7664	0.0917529		10.8325	0.113702	0.0883611	true	0.145315	true	3	23			1.27329	0.978207	85.606			N	N	N
42	B18	false	HBx	MAGEA6	UNKNOWN	SYBR	None	0.940591	0.755735	1.17066	27.935	27.7664	0.0917529		10.8325	0.113702	0.0883611	true	0.145315	true	3	23			1.27652	0.982057	85.606			N	N	N
85	D13	false	Vec	FAMI10C	UNKNOWN	SYBR	None	1	0.88742	1.12686	27.032	27.1418	0.0564005		10.293	0.062062	0	true	0.152909	true	3	22			1.3165	0.97671	92.0332			N	N	N
86	D14	false	Vec	FAMI10C	UNKNOWN	SYBR	None	1	0.88742	1.12686	27.22	27.1418	0.0564005		10.293	0.062062	0	true	0.152909	true	3	22			1.31474	0.964283	92.1617			N	N	N
87	D15	false	Vec	FAMI10C	UNKNOWN	SYBR	None	1	0.88742	1.12686	27.173	27.1418	0.0564005		10.293	0.062062	0	true	0.152909	true	3	22			1.31092	0.975995	92.1617			N	N	N
88	D16	false	HBx	FAMI10C	UNKNOWN	SYBR	None	0.910475	0.789008	1.05064	27.354	27.3623	0.0320383		10.4283	0.0744043	0.135309	true	0.152909	true	3	22			1.31231	0.970674	92.0332			N	N	N
89	D17	false	HBx	FAMI10C	UNKNOWN	SYBR	None	0.910475	0.789008	1.05064	27.421	27.3623	0.0320383		10.4283	0.0744043	0.135309	true	0.152909	true	3	22			1.31192	0.97933	92.0332			N	N	N
90	D18	false	HBx	FAMI10C	UNKNOWN	SYBR	None	0.910475	0.789008	1.05064	27.311	27.3623	0.0320383		10.4283	0.0744043	0.135309	true	0.152909	true	3	22			1.3024	0.976827	92.0332			N	N	N
109	E13	false	Vec	CPEB3	UNKNOWN	SYBR	None	1	0.894891	1.11745	29.925	29.9864	0.0515677		13.1376	0.0577052	0	true	0.164294	true	3	24			1.29767	0.975594	91.2619			N	N	N
110	E14	false	Vec	CPEB3	UNKNOWN	SYBR	None	1	0.894891	1.11745	30.089	29.9864	0.0515677		13.1376	0.0577052	0	true	0.164294	true	3	25			1.28742	0.974928	91.2619			N	N	N
111	E15	false	Vec	CPEB3	UNKNOWN	SYBR	None	1	0.894891	1.11745	29.945	29.9864	0.0515677		13.1376	0.0577052	0	true	0.164294	true	3	25			1.29338	0.978868	91.2619			N	N	N
112	E16	false	HBx	CPEB3	UNKNOWN	SYBR	None	0.992622	0.804729	1.22439	30.239	30.0822	0.085907		13.1483	0.109039	0.0106831	true	0.164294	true	3	25			1.28682	0.977478	91.2619			N	N	N
113	E17	false	HBx	CPEB3	UNKNOWN	SYBR	None	0.992622	0.804729	1.22439	30.064	30.0822	0.085907		13.1483	0.109039	0.0106831	true	0.164294	true	3	25			1.28932	0.971351	91.2619			N	N	N
114	E18	false	HBx	CPEB3	UNKNOWN	SYBR	None	0.992622	0.804729	1.22439	29.944	30.0822	0.085907		13.1483	0.109039	0.0106831	true	0.164294	true	3	25			1.29168	0.975648	91.2619			N	N	N
133	F13	false	Vec	CYC	UNKNOWN	SYBR	None				16.87	16.8488	0.0258973					true	0.113252	true	3	12			1.28264	0.953459	83.5493			N	N	N
134	F14	false	Vec	CYC	UNKNOWN	SYBR	None				16.879	16.8488	0.0258973					true	0.113252	true	3	12			1.27133	0.965575	83.5493			N	N	N
135	F15	false	Vec	CYC	UNKNOWN	SYBR	None				16.797	16.8488	0.0258973					true	0.113252	true	3	12			1.28743	0.971232	83.5493			N	N	N
136	F16	false	HBx	CYC	UNKNOWN	SYBR	None				16.909	16.934	0.0671532					true	0.113252	true	3	12			1.28243	0.949007	83.5493			N	N	N
137	F17	false	HBx	CYC	UNKNOWN	SYBR	None				17.061	16.934	0.0671532					true	0.113252	true	3	13			1.26894	0.888671	83.5493			N	N	N
138	F18	false	HBx	CYC	UNKNOWN	SYBR	None				16.832	16.934	0.0671532					true	0.113252	true	3	12			1.27538	0.960299	83.5493			N	N	N
181	H13	false	Vec	ALDOB	UNKNOWN	SYBR	None	1	0.639477	1.56378	30.536	30.08	0.230877		13.2313	0.232324	0	true	0.118895	true	3	26			1.26263	0.984968	82.1353			N	N	N
182	H14	false	Vec	ALDOB	UNKNOWN	SYBR	None	1	0.639477	1.56378	29.916	30.08	0.230877		13.2313	0.232324	0	true	0.118895	true	3	25			1.28001	0.978485	82.1353			N	N	N
183	H15	false	Vec	ALDOB	UNKNOWN	SYBR	None	1	0.639477	1.56378	29.789	30.08	0.230877		13.2313	0.232324	0	true	0.118895	true	3	25			1.28015	0.971009	82.1353			N	N	N
184	H16	false	HBx	ALDOB	UNKNOWN	SYBR	None	0.960512	0.78552	1.17449	30.166	30.2234	0.0800755		13.2894	0.104507	0.0581239	true	0.118895	true	3	25			1.2811	0.975188	82.1353			N	N	N
185	H17	false	HBx	ALDOB	UNKNOWN	SYBR	None	0.960512	0.78552	1.17449	30.122	30.2234	0.0800755		13.2894	0.104507	0.0581239	true	0.118895	true	3	25			1.29014	0.976845	82.1353			N	N	N
186	H18	false	HBx	ALDOB	UNKNOWN	SYBR	None	0.960512	0.78552	1.17449	30.381	30.2234	0.0800755		13.2894	0.104507	0.0581239	true	0.118895	true	3	26			1.28079	0.969921	82.1353			N	N	N
205	I13	false	Vec	ALDH8A1	UNKNOWN	SYBR	None	1	0.858983	1.16417	30.116	30.054	0.0746189		13.2053	0.0789851	0	true	0.115328	true	3	25			1.23325	0.984983	89.5909			N	N	N
206	I14	false	Vec	ALDH8A1	UNKNOWN	SYBR	None	1	0.858983	1.16417	30.14	30.054	0.0746189		13.2053	0.0789851	0	true	0.115328	true	3	25			1.23163	0.961073	89.5909			N	N	N
207	I15	false	Vec	ALDH8A1	UNKNOWN	SYBR	None	1	0.858983	1.16417	29.905	30.054	0.0746189		13.2053	0.0789851	0	true	0.115328	true	3	25			1.23621	0.984463	89.5909			N	N	N
208	I16	false	HBx	ALDH8A1	UNKNOWN	SYBR	None	0.725373	0.481951	1.09174	30.202	30.6024	0.20155		13.6685	0.212443	0.463206	true	0.115328	true	3	26			1.23445	0.975812	89.5909			N	N	N
209	I17	false	HBx	ALDH8A1	UNKNOWN	SYBR	None	0.725373	0.481951	1.09174	30.84	30.6024	0.20155		13.6685	0.212443	0.463206	true	0.115328	true	3	26			1.23484	0.980158	89.5909			N	N	N
210	I18	false	HBx	ALDH8A1	UNKNOWN	SYBR	None	0.725373	0.481951	1.09174	30.765	30.6024	0.20155		13.6685	0.212443	0.463206	true	0.115328	true	3	25			1.23246	0.983069	89.5909			N	N	N
355	O19	false	Vec	C8A	UNKNOWN	SYBR	None	1	0.848305	1.17882	27.956	28.1185	0.081468		11.2698	0.0854851	0	true	0.144202	true	3	23			1.30776	0.975969	85.2204			N	N	N
356	O20	false	Vec	C8A	UNKNOWN	SYBR	None	1	0.848305	1.17882	28.192	28.1185	0.081468		11.2698	0.0854851	0	true	0.144202	true	3	23			1.29696	0.976619	85.2204			N	N	N
357	O21	false	Vec	C8A	UNKNOWN	SYBR	None	1	0.848305	1.17882	28.208	28.1185	0.081468		11.2698	0.0854851	0	true	0.144202	true	3	23			1.29868	0.978545	85.2204			N	N	N
358	O22	false	HBx	C8A	UNKNOWN	SYBR	None	0.737197	0.620854	0.875341	28.68	28.6436	0.0587868		11.7096	0.0892493	0.439878	true	0.144202	true	3	24			1.30057	0.97783	85.0918			N	N	N
359	O23	false	HBx	C8A	UNKNOWN	SYBR	None	0.737197	0.620854	0.875341	28.722	28.6436	0.0587868		11.7096	0.0892493	0.439878	true	0.144202	true	3	24			1.29136	0.983054	85.2204			N	N	N
360	O24	false	HBx	C8A	UNKNOWN	SYBR	None	0.737197	0.620854	0.875341	28.529	28.6436	0.0587868		11.7096	0.0892493	0.439878	true	0.144202	true	3	24			1.27914	0.987183	85.0918			N	N	N
379	P19	false	Vec	TAT	UNKNOWN	SYBR	None	1	0.632412	1.58125	31.289	30.9813	0.236684		14.1325	0.238097	0	true	0.04	true	3	28			1.15872	0.993746	82.2639			N	N	Y
380	P20	false	Vec	TAT	UNKNOWN	SYBR	None	1	0.632412	1.58125	30.516	30.9813	0.236684		14.1325	0.238097	0	true	0.04	true	3	27			1.16514	0.994553	82.2639			N	N	Y
381	P21	false	Vec	TAT	UNKNOWN	SYBR	None	1	0.632412	1.58125	31.139	30.9813	0.236684		14.1325	0.238097	0	true	0.04	true	3	28			1.16149	0.993757	82.1353			N	N	Y
382	P22	false	HBx	TAT	UNKNOWN	SYBR	None	0.492053	0.355061	0.681899	32.105	32.0896	0.155684		15.1556	0.16955	1.02312	true	0.04	true	3	29			1.1678	0.99239	82.1353			N	N	Y
383	P23	false	HBx	TAT	UNKNOWN	SYBR	None	0.492053	0.355061	0.681899	32.351	32.0896	0.155684		15.1556	0.16955	1.02312	true	0.04	true	3	29			1.16436	0.9923	82.1353			N	N	Y
384	P24	false	HBx	TAT	UNKNOWN	SYBR	None	0.492053	0.355061	0.681899	31.813	32.0896	0.155684		15.1556	0.16955	1.02312	true	0.04	true	3	29			1.16189	0.993281	82.1353			N	N	Y
Analysis Type	Singleplex
Endogenous Control	CYC
RQ Min/Max Confidence Level	95.0
Reference Sample	Vec

## Sheet: Melt Curve Raw Data
Block Type	384-Well Block
Calibration Background is expired	Yes
Calibration Background performed on	10-12-2018 11:47:46 PDT
Calibration FAM is expired	Yes
Calibration FAM performed on	10-23-2018 10:23:19 PDT
Calibration MELTDOCTOR is expired	Yes
Calibration MELTDOCTOR performed on	09-26-2017 21:22:46 PDT
Calibration NED is expired	Yes
Calibration NED performed on	10-23-2018 10:33:14 PDT
Calibration ROI is expired	Yes
Calibration ROI performed on	10-12-2018 09:37:21 PDT
Calibration ROX is expired	Yes
Calibration ROX performed on	10-23-2018 10:07:21 PDT
Calibration SYBR is expired	Yes
Calibration SYBR performed on	10-23-2018 09:57:53 PDT
Calibration TAMRA is expired	Yes
Calibration TAMRA performed on	10-23-2018 10:45:25 PDT
Calibration Uniformity is expired	Yes
Calibration Uniformity performed on	10-12-2018 10:06:59 PDT
Calibration VIC is expired	Yes
Calibration VIC performed on	10-23-2018 10:54:25 PDT
Chemistry	SYBR_GREEN
Date Created	10-12-2020 12:11:39 PDT
Experiment File Name	D:\NZZ\2020-10-12 101128.eds
Experiment Name	2020-10-12 101128
Experiment Run End Time	10-12-2020 04:51:15 PDT
Experiment Type	Comparative Cт (ΔΔCт)
Instrument Name	285880860
Instrument Serial Number	285880860
Instrument Type	QuantStudio 12K Flex
Passive Reference	ROX
Quantification Cycle Method	Ct
Signal Smoothing On	true
Stage/ Cycle where Analysis is performed	Stage 2, Step 2
Well	Well Position	Reading	Temperature	Fluorescence	Derivative
13	A13	1	60.1543	1.60436	0.0699486
13	A13	2	60.4114	1.59518	0.070203
13	A13	3	60.6685	1.59051	0.0705425
13	A13	4	60.9256	1.58071	0.0709144
13	A13	5	61.1827	1.57006	0.0712543
13	A13	6	61.4397	1.56436	0.0714989
13	A13	7	61.6968	1.55162	0.0716133
13	A13	8	61.9539	1.54407	0.0716089
13	A13	9	62.211	1.53259	0.0715414
13	A13	10	62.4681	1.52388	0.0714715
13	A13	11	62.7252	1.51834	0.07142
13	A13	12	62.9823	1.50562	0.0713471
13	A13	13	63.2394	1.49845	0.0711876
13	A13	14	63.4964	1.48501	0.0709071
13	A13	15	63.7535	1.4775	0.0705369
13	A13	16	64.0106	1.4723	0.0701632
13	A13	17	64.2677	1.45838	0.069876
13	A13	18	64.5248	1.45076	0.0697135
13	A13	19	64.7819	1.44345	0.06965
13	A13	20	65.039	1.43357	0.0696259
13	A13	21	65.2961	1.42688	0.0696225
13	A13	22	65.5531	1.41042	0.0697085
13	A13	23	65.8102	1.40481	0.0700109
13	A13	24	66.0673	1.39865	0.070605
13	A13	25	66.3244	1.3904	0.0714023
13	A13	26	66.5815	1.38141	0.0721436
13	A13	27	66.8386	1.36905	0.0725351
13	A13	28	67.0957	1.35752	0.072428
13	A13	29	67.3528	1.34466	0.0719081
13	A13	30	67.6098	1.3429	0.07123
13	A13	31	67.8669	1.33431	0.0706519
13	A13	32	68.124	1.32153	0.0703087
13	A13	33	68.3811	1.31322	0.0701766
13	A13	34	68.6382	1.3037	0.0701309
13	A13	35	68.8953	1.29767	0.0700182
13	A13	36	69.1524	1.28663	0.0697222
13	A13	37	69.4095	1.27644	0.069215
13	A13	38	69.6665	1.2681	0.0685904
13	A13	39	69.9236	1.25678	0.068051
13	A13	40	70.1807	1.25318	0.0678378
13	A13	41	70.4378	1.2412	0.0681138
13	A13	42	70.6949	1.23472	0.0688676
13	A13	43	70.952	1.22732	0.0698885
13	A13	44	71.2091	1.21569	0.0708441
13	A13	45	71.4662	1.20755	0.0714227
13	A13	46	71.7233	1.19395	0.0714638
13	A13	47	71.9803	1.1853	0.0710067
13	A13	48	72.2374	1.17802	0.07024
13	A13	49	72.4945	1.16914	0.0693901
13	A13	50	72.7516	1.16091	0.0686237
13	A13	51	73.0087	1.14875	0.0680159
13	A13	52	73.2658	1.14436	0.0675657
13	A13	53	73.5229	1.13267	0.0672329
13	A13	54	73.78	1.12464	0.0669668
13	A13	55	74.037	1.11794	0.0667287
13	A13	56	74.2941	1.10894	0.0665172
13	A13	57	74.5512	1.09445	0.0663793
13	A13	58	74.8083	1.09319	0.0663901
13	A13	59	75.0654	1.08174	0.0665969
13	A13	60	75.3225	1.07421	0.0669594
13	A13	61	75.5796	1.0656	0.067338
13	A13	62	75.8367	1.05612	0.0675514
13	A13	63	76.0937	1.04661	0.0674795
13	A13	64	76.3508	1.03821	0.0671616
13	A13	65	76.6079	1.02607	0.066831
13	A13	66	76.865	1.02019	0.0668871
13	A13	67	77.1221	1.01565	0.0678509
13	A13	68	77.3792	1.00388	0.0703855
13	A13	69	77.6363	0.996421	0.0754151
13	A13	70	77.8934	0.985815	0.0842978
13	A13	71	78.1504	0.977786	0.098949
13	A13	72	78.4075	0.970094	0.121768
13	A13	73	78.6646	0.956621	0.155282
13	A13	74	78.9217	0.944222	0.201479
13	A13	75	79.1788	0.92432	0.260932
13	A13	76	79.4359	0.899924	0.331954
13	A13	77	79.693	0.855239	0.41013
13	A13	78	79.9501	0.794352	0.488527
13	A13	79	80.2072	0.713001	0.558664
13	A13	80	80.4642	0.606583	0.611994
13	A13	81	80.7213	0.505356	0.641475
13	A13	82	80.9784	0.400518	0.642825
13	A13	83	81.2355	0.296342	0.615245
13	A13	84	81.4926	0.199498	0.561574
13	A13	85	81.7497	0.119035	0.487886
13	A13	86	82.0068	0.0627782	0.402519
13	A13	87	82.2639	0.0295674	0.314626
13	A13	88	82.5209	0.0144067	0.232511
13	A13	89	82.778	0.00742597	0.162222
13	A13	90	83.0351	0.0054155	0.106821
13	A13	91	83.2922	0.00407577	0.066497
13	A13	92	83.5493	0.0037661	0.0393411
13	A13	93	83.8064	0.00279469	0.0223981
13	A13	94	84.0635	0.00316192	0.0125985
13	A13	95	84.3206	0.0024394	0.00734785
13	A13	96	84.5776	0.00224922	0.00474812
13	A13	97	84.8347	0.00181316	0.00356006
13	A13	98	85.0918	0.00178052	0.00304677
13	A13	99	85.3489	0.00110319	0.00280572
13	A13	100	85.606	0.000491165	0.00263963
13	A13	101	85.8631	0.000129207	0.00247248
13	A13	102	86.1202	0.00022853	0.00229585
13	A13	103	86.3773	-0.00029489	0.00213039
13	A13	104	86.6343	-0.000614323	0.00199597
13	A13	105	86.8914	-0.00033444	0.00189379
13	A13	106	87.1485	-0.000810108	0.0018057
13	A13	107	87.4056	-0.00149984	0.00171068
13	A13	108	87.6627	-0.00182317	0.00160655
13	A13	109	87.9198	-0.00186374	0.00151838
13	A13	110	88.1769	-0.00134738	0.00148268
13	A13	111	88.434	-0.00160909	0.00151627
13	A13	112	88.691	-0.00176202	0.00159454
13	A13	113	88.9481	-0.00266226	0.00165991
13	A13	114	89.2052	-0.00332545	0.00165752
13	A13	115	89.4623	-0.00294341	0.00157268
13	A13	116	89.7194	-0.0030896	0.00144263
13	A13	117	89.9765	-0.00309302	0.00133456
13	A13	118	90.2336	-0.0031179	0.00130604
13	A13	119	90.4907	-0.0033608	0.00137296
13	A13	120	90.7477	-0.00327103	0.00150224
13	A13	121	91.0048	-0.00408487	0.00163016
13	A13	122	91.2619	-0.00455544	0.00169405
13	A13	123	91.519	-0.00448647	0.00166055
13	A13	124	91.7761	-0.00475632	0.00153742
13	A13	125	92.0332	-0.00503693	0.00136598
13	A13	126	92.2903	-0.00468475	0.00120077
13	A13	127	92.5474	-0.00509297	0.00108814
13	A13	128	92.8045	-0.00491784	0.00105266
13	A13	129	93.0615	-0.00534942	0.00109382
13	A13	130	93.3186	-0.00524674	0.00118965
13	A13	131	93.5757	-0.00557474	0.00130266
13	A13	132	93.8328	-0.00558977	0.00138673
13	A13	133	94.0899	-0.00630049	0.00139673
13	A13	134	94.347	-0.00620817	0.00130193
13	A13	135	94.6041	-0.00665899	0.0010994
13	A13	136	94.8612	-0.00709632	0.000819533
14	A14	1	60.1543	1.60003	0.0719338
14	A14	2	60.4114	1.58774	0.0728559
14	A14	3	60.6685	1.58052	0.0737197
14	A14	4	60.9256	1.57495	0.0742418
14	A14	5	61.1827	1.56143	0.0742094
14	A14	6	61.4397	1.55146	0.0735828
14	A14	7	61.6968	1.53934	0.0725377
14	A14	8	61.9539	1.53296	0.0714008
14	A14	9	62.211	1.52299	0.0705142
14	A14	10	62.4681	1.51598	0.0700873
14	A14	11	62.7252	1.50956	0.0701351
14	A14	12	62.9823	1.49724	0.0705298
14	A14	13	63.2394	1.48693	0.0711038
14	A14	14	63.4964	1.47715	0.0717233
14	A14	15	63.7535	1.47114	0.0722957
14	A14	16	64.0106	1.46216	0.0727341
14	A14	17	64.2677	1.45102	0.0729618
14	A14	18	64.5248	1.43911	0.0729537
14	A14	19	64.7819	1.4299	0.0727736
14	A14	20	65.039	1.42246	0.0725446
14	A14	21	65.2961	1.41227	0.072366
14	A14	22	65.5531	1.40415	0.0722385
14	A14	23	65.8102	1.39521	0.072072
14	A14	24	66.0673	1.38433	0.0717696
14	A14	25	66.3244	1.37147	0.071324
14	A14	26	66.5815	1.36641	0.0708435
14	A14	27	66.8386	1.3558	0.0704901
14	A14	28	67.0957	1.34942	0.0703687
14	A14	29	67.3528	1.33804	0.0704608
14	A14	30	67.6098	1.33258	0.0706445
14	A14	31	67.8669	1.31882	0.0707757
14	A14	32	68.124	1.30942	0.0707701
14	A14	33	68.3811	1.3018	0.0706262
14	A14	34	68.6382	1.29518	0.0703947
14	A14	35	68.8953	1.28238	0.0701338
14	A14	36	69.1524	1.27528	0.069884
14	A14	37	69.4095	1.26503	0.0696749
14	A14	38	69.6665	1.25716	0.0695383
14	A14	39	69.9236	1.24813	0.0695073
14	A14	40	70.1807	1.23885	0.069612
14	A14	41	70.4378	1.23074	0.0698608
14	A14	42	70.6949	1.21999	0.0702239
14	A14	43	70.952	1.21114	0.0706168
14	A14	44	71.2091	1.2063	0.0709058
14	A14	45	71.4662	1.1916	0.0709503
14	A14	46	71.7233	1.18399	0.0706714
14	A14	47	71.9803	1.17237	0.0701009
14	A14	48	72.2374	1.1649	0.0693776
14	A14	49	72.4945	1.15721	0.0686834
14	A14	50	72.7516	1.14826	0.0681591
14	A14	51	73.0087	1.13867	0.0678557
14	A14	52	73.2658	1.13034	0.0677316
14	A14	53	73.5229	1.12232	0.0676916
14	A14	54	73.78	1.11347	0.0676388
14	A14	55	74.037	1.10318	0.0675216
14	A14	56	74.2941	1.09491	0.067358
14	A14	57	74.5512	1.08655	0.0672269
14	A14	58	74.8083	1.07792	0.0672264
14	A14	59	75.0654	1.06836	0.0674141
14	A14	60	75.3225	1.06207	0.0677581
14	A14	61	75.5796	1.05248	0.0681354
14	A14	62	75.8367	1.04392	0.068387
14	A14	63	76.0937	1.03205	0.0684035
14	A14	64	76.3508	1.02395	0.0682002
14	A14	65	76.6079	1.01553	0.0679498
14	A14	66	76.865	1.00828	0.0679794
14	A14	67	77.1221	0.997343	0.068774
14	A14	68	77.3792	0.990607	0.0710249
14	A14	69	77.6363	0.981859	0.0757358
14	A14	70	77.8934	0.972851	0.0843573
14	A14	71	78.1504	0.966237	0.0988776
14	A14	72	78.4075	0.951859	0.121754
14	A14	73	78.6646	0.944114	0.155566
14	A14	74	78.9217	0.931026	0.202338
14	A14	75	79.1788	0.911823	0.262618
14	A14	76	79.4359	0.885873	0.334597
14	A14	77	79.693	0.841369	0.413636
14	A14	78	79.9501	0.779959	0.492532
14	A14	79	80.2072	0.696828	0.562563
14	A14	80	80.4642	0.58865	0.615049
14	A14	81	80.7213	0.487749	0.64298
14	A14	82	80.9784	0.381481	0.642278
14	A14	83	81.2355	0.27805	0.612481
14	A14	84	81.4926	0.182032	0.556816
14	A14	85	81.7497	0.104512	0.481691
14	A14	86	82.0068	0.0492084	0.395639
14	A14	87	82.2639	0.0179018	0.307823
14	A14	88	82.5209	0.00328455	0.226394
14	A14	89	82.778	-0.00245183	0.157152
14	A14	90	83.0351	-0.00457169	0.102896
14	A14	91	83.2922	-0.00610874	0.0636105
14	A14	92	83.5493	-0.00669749	0.0372765
14	A14	93	83.8064	-0.00660223	0.0209168
14	A14	94	84.0635	-0.00669793	0.0114971
14	A14	95	84.3206	-0.0066999	0.00648183
14	A14	96	84.5776	-0.00782755	0.00403453
14	A14	97	84.8347	-0.00774209	0.00297077
14	A14	98	85.0918	-0.00786123	0.00259487
14	A14	99	85.3489	-0.00766575	0.00252163
14	A14	100	85.606	-0.00834112	0.00253951
14	A14	101	85.8631	-0.0094532	0.00253138
14	A14	102	86.1202	-0.00940632	0.0024407
14	A14	103	86.3773	-0.0097819	0.00225921
14	A14	104	86.6343	-0.00969424	0.00201658
14	A14	105	86.8914	-0.0108445	0.00176392
14	A14	106	87.1485	-0.0102415	0.00155312
14	A14	107	87.4056	-0.0102577	0.00141812
14	A14	108	87.6627	-0.0105637	0.00136482
14	A14	109	87.9198	-0.0109034	0.00137258
14	A14	110	88.1769	-0.0112289	0.00140533
14	A14	111	88.434	-0.0110277	0.00142554
14	A14	112	88.691	-0.0115322	0.00140542
14	A14	113	88.9481	-0.011719	0.00133445
14	A14	114	89.2052	-0.0120587	0.00122384
14	A14	115	89.4623	-0.0121591	0.00110585
14	A14	116	89.7194	-0.0120263	0.00102341
14	A14	117	89.9765	-0.011643	0.00101076
14	A14	118	90.2336	-0.0121228	0.00107459
14	A14	119	90.4907	-0.0123677	0.00118874
14	A14	120	90.7477	-0.0129273	0.00130692
14	A14	121	91.0048	-0.0127473	0.00138567
14	A14	122	91.2619	-0.0129325	0.00140364
14	A14	123	91.519	-0.0136134	0.00136776
14	A14	124	91.7761	-0.0133223	0.00130575
14	A14	125	92.0332	-0.0135768	0.00125046
14	A14	126	92.2903	-0.0133576	0.00122355
14	A14	127	92.5474	-0.0136442	0.00122594
14	A14	128	92.8045	-0.0142435	0.00123966
14	A14	129	93.0615	-0.0141481	0.00123978
14	A14	130	93.3186	-0.014353	0.00120839
14	A14	131	93.5757	-0.0146581	0.00114141
14	A14	132	93.8328	-0.0144223	0.0010449
14	A14	133	94.0899	-0.0148766	0.000925945
14	A14	134	94.347	-0.0145891	0.000786946
14	A14	135	94.6041	-0.0150714	0.000628067
14	A14	136	94.8612	-0.0154122	0.000454802
15	A15	1	60.1543	1.62786	0.0717571
15	A15	2	60.4114	1.61546	0.0721537
15	A15	3	60.6685	1.60917	0.072282
15	A15	4	60.9256	1.59902	0.0721145
15	A15	5	61.1827	1.58924	0.071789
15	A15	6	61.4397	1.5764	0.0715216
15	A15	7	61.6968	1.57555	0.0714551
15	A15	8	61.9539	1.56672	0.0715627
15	A15	9	62.211	1.55338	0.0716848
15	A15	10	62.4681	1.54227	0.0716688
15	A15	11	62.7252	1.53327	0.0714934
15	A15	12	62.9823	1.52532	0.0712824
15	A15	13	63.2394	1.51734	0.0712039
15	A15	14	63.4964	1.5066	0.0713491
15	A15	15	63.7535	1.50042	0.0716792
15	A15	16	64.0106	1.48883	0.0720596
15	A15	17	64.2677	1.47859	0.0723525
15	A15	18	64.5248	1.46941	0.0724808
15	A15	19	64.7819	1.46077	0.0724433
15	A15	20	65.039	1.45106	0.0722818
15	A15	21	65.2961	1.44121	0.0720316
15	A15	22	65.5531	1.43196	0.0716972
15	A15	23	65.8102	1.423	0.071254
15	A15	24	66.0673	1.41435	0.0706787
15	A15	25	66.3244	1.40288	0.0699967
15	A15	26	66.5815	1.3957	0.0693058
15	A15	27	66.8386	1.38516	0.0687683
15	A15	28	67.0957	1.37758	0.0685518
15	A15	29	67.3528	1.36971	0.0687568
15	A15	30	67.6098	1.36238	0.069366
15	A15	31	67.8669	1.35216	0.0702526
15	A15	32	68.124	1.34165	0.0712362
15	A15	33	68.3811	1.33308	0.0721457
15	A15	34	68.6382	1.32438	0.0728585
15	A15	35	68.8953	1.31536	0.0733066
15	A15	36	69.1524	1.30283	0.0734595
15	A15	37	69.4095	1.29505	0.0733059
15	A15	38	69.6665	1.28604	0.0728424
15	A15	39	69.9236	1.27617	0.0720813
15	A15	40	70.1807	1.26565	0.071067
15	A15	41	70.4378	1.25757	0.0699017
15	A15	42	70.6949	1.24565	0.0687447
15	A15	43	70.952	1.24105	0.0677794
15	A15	44	71.2091	1.23146	0.0671626
15	A15	45	71.4662	1.22187	0.0669749
15	A15	46	71.7233	1.21384	0.0671989
15	A15	47	71.9803	1.20793	0.067724
15	A15	48	72.2374	1.19603	0.0683762
15	A15	49	72.4945	1.18782	0.0689615
15	A15	50	72.7516	1.17923	0.0693128
15	A15	51	73.0087	1.16863	0.0693386
15	A15	52	73.2658	1.16201	0.0690519
15	A15	53	73.5229	1.14826	0.0685723
15	A15	54	73.78	1.14247	0.068084
15	A15	55	74.037	1.13415	0.0677608
15	A15	56	74.2941	1.12698	0.0676923
15	A15	57	74.5512	1.11628	0.0678551
15	A15	58	74.8083	1.10851	0.0681426
15	A15	59	75.0654	1.09815	0.0684322
15	A15	60	75.3225	1.09123	0.0686508
15	A15	61	75.5796	1.07934	0.068798
15	A15	62	75.8367	1.07295	0.0689212
15	A15	63	76.0937	1.06194	0.0690675
15	A15	64	76.3508	1.05549	0.0692547
15	A15	65	76.6079	1.04801	0.0695005
15	A15	66	76.865	1.03351	0.0699188
15	A15	67	77.1221	1.02588	0.0708517
15	A15	68	77.3792	1.01989	0.0729894
15	A15	69	77.6363	1.00799	0.0774547
15	A15	70	77.8934	1.00089	0.0858548
15	A15	71	78.1504	0.994028	0.100291
15	A15	72	78.4075	0.982881	0.123258
15	A15	73	78.6646	0.968108	0.157309
15	A15	74	78.9217	0.958179	0.204416
15	A15	75	79.1788	0.94073	0.265068
15	A15	76	79.4359	0.913859	0.337402
15	A15	77	79.693	0.866247	0.416752
15	A15	78	79.9501	0.804443	0.495929
15	A15	79	80.2072	0.723927	0.566265
15	A15	80	80.4642	0.614283	0.619155
15	A15	81	80.7213	0.512188	0.647631
15	A15	82	80.9784	0.406399	0.647589
15	A15	83	81.2355	0.302683	0.61845
15	A15	84	81.4926	0.20641	0.563272
15	A15	85	81.7497	0.126003	0.488294
15	A15	86	82.0068	0.0697889	0.401955
15	A15	87	82.2639	0.0371821	0.313448
15	A15	88	82.5209	0.0221945	0.231072
15	A15	89	82.778	0.0164206	0.160829
15	A15	90	83.0351	0.014359	0.1057
15	A15	91	83.2922	0.0130279	0.0657652
15	A15	92	83.5493	0.012384	0.0390031
15	A15	93	83.8064	0.0116835	0.0223714
15	A15	94	84.0635	0.0113628	0.0127604
15	A15	95	84.3206	0.0108512	0.00758468
15	A15	96	84.5776	0.0101962	0.00498832
15	A15	97	84.8347	0.0109929	0.00378072
15	A15	98	85.0918	0.00989345	0.00325828
15	A15	99	85.3489	0.00962018	0.00302902
15	A15	100	85.606	0.00892408	0.00288988
15	A15	101	85.8631	0.00844091	0.00275427
15	A15	102	86.1202	0.0081429	0.00260617
15	A15	103	86.3773	0.0082385	0.00246297
15	A15	104	86.6343	0.00805253	0.00234497
15	A15	105	86.8914	0.00738662	0.00225757
15	A15	106	87.1485	0.00698397	0.00218915
15	A15	107	87.4056	0.00693741	0.0021202
15	A15	108	87.6627	0.00651402	0.00203492
15	A15	109	87.9198	0.00596565	0.00192896
15	A15	110	88.1769	0.00619927	0.00181126
15	A15	111	88.434	0.00588565	0.00170107
15	A15	112	88.691	0.00539506	0.00162175
15	A15	113	88.9481	0.00553529	0.00159274
15	A15	114	89.2052	0.00563914	0.00162135
15	A15	115	89.4623	0.0048578	0.00169718
15	A15	116	89.7194	0.00511355	0.0017932
15	A15	117	89.9765	0.00446932	0.00187499
15	A15	118	90.2336	0.00411281	0.00191503
15	A15	119	90.4907	0.00364373	0.00190335
15	A15	120	90.7477	0.00398712	0.00184775
15	A15	121	91.0048	0.00370016	0.00176376
15	A15	122	91.2619	0.00330543	0.00166333
15	A15	123	91.519	0.00294189	0.00155139
15	A15	124	91.7761	0.00279489	0.00143165
15	A15	125	92.0332	0.002843	0.0013139
15	A15	126	92.2903	0.00276285	0.00121473
15	A15	127	92.5474	0.00248849	0.00115047
15	A15	128	92.8045	0.0026426	0.00112848
15	A15	129	93.0615	0.00210676	0.00114292
15	A15	130	93.3186	0.00219273	0.00117595
15	A15	131	93.5757	0.00201562	0.00120182
15	A15	132	93.8328	0.0018022	0.00119204
15	A15	133	94.0899	0.0016723	0.00112235
15	A15	134	94.347	0.00100422	0.000981981
15	A15	135	94.6041	0.00134144	0.000781063
15	A15	136	94.8612	0.00116986	0.000550198
16	A16	1	60.1543	1.61714	0.0735988
16	A16	2	60.4114	1.60715	0.0747025
16	A16	3	60.6685	1.59988	0.0758367
16	A16	4	60.9256	1.59084	0.0766744
16	A16	5	61.1827	1.57832	0.0769276
16	A16	6	61.4397	1.57085	0.0764551
16	A16	7	61.6968	1.5555	0.0753312
16	A16	8	61.9539	1.54805	0.0738316
16	A16	9	62.211	1.53915	0.0723456
16	A16	10	62.4681	1.52965	0.0712422
16	A16	11	62.7252	1.52299	0.0707514
16	A16	12	62.9823	1.51364	0.0709143
16	A16	13	63.2394	1.5041	0.0716019
16	A16	14	63.4964	1.49496	0.0725813
16	A16	15	63.7535	1.48335	0.0735798
16	A16	16	64.0106	1.4797	0.0743465
16	A16	17	64.2677	1.46349	0.0747053
16	A16	18	64.5248	1.45513	0.0746048
16	A16	19	64.7819	1.44527	0.0741331
16	A16	20	65.039	1.43331	0.0734802
16	A16	21	65.2961	1.4269	0.0728579
16	A16	22	65.5531	1.42052	0.0724208
16	A16	23	65.8102	1.40543	0.0722286
16	A16	24	66.0673	1.39789	0.072249
16	A16	25	66.3244	1.38924	0.0723722
16	A16	26	66.5815	1.38227	0.0724394
16	A16	27	66.8386	1.37083	0.0722904
16	A16	28	67.0957	1.35948	0.0718363
16	A16	29	67.3528	1.35048	0.071131
16	A16	30	67.6098	1.34028	0.0703713
16	A16	31	67.8669	1.3335	0.0698198
16	A16	32	68.124	1.32665	0.0696832
16	A16	33	68.3811	1.31474	0.0700074
16	A16	34	68.6382	1.30748	0.0706504
16	A16	35	68.8953	1.29972	0.0713338
16	A16	36	69.1524	1.28944	0.0717576
16	A16	37	69.4095	1.2769	0.0717287
16	A16	38	69.6665	1.27	0.0712519
16	A16	39	69.9236	1.25703	0.0705312
16	A16	40	70.1807	1.25026	0.0698653
16	A16	41	70.4378	1.24367	0.0694991
16	A16	42	70.6949	1.2342	0.0695085
16	A16	43	70.952	1.22658	0.0697869
16	A16	44	71.2091	1.21368	0.0701395
16	A16	45	71.4662	1.20693	0.0704116
16	A16	46	71.7233	1.19497	0.0705665
16	A16	47	71.9803	1.18882	0.0706734
16	A16	48	72.2374	1.17709	0.0708239
16	A16	49	72.4945	1.1707	0.0710369
16	A16	50	72.7516	1.16171	0.0712256
16	A16	51	73.0087	1.1511	0.0712411
16	A16	52	73.2658	1.14048	0.0709734
16	A16	53	73.5229	1.1314	0.0704331
16	A16	54	73.78	1.12186	0.0697623
16	A16	55	74.037	1.11342	0.0691635
16	A16	56	74.2941	1.10667	0.0687966
16	A16	57	74.5512	1.09872	0.0687171
16	A16	58	74.8083	1.08547	0.0688835
16	A16	59	75.0654	1.07929	0.0692102
16	A16	60	75.3225	1.07084	0.0696169
16	A16	61	75.5796	1.05996	0.0700405
16	A16	62	75.8367	1.05103	0.0704159
16	A16	63	76.0937	1.04459	0.0706706
16	A16	64	76.3508	1.03303	0.0707602
16	A16	65	76.6079	1.02314	0.0707435
16	A16	66	76.865	1.01274	0.0708601
16	A16	67	77.1221	1.00524	0.0715848
16	A16	68	77.3792	0.99762	0.0736666
16	A16	69	77.6363	0.98831	0.0781947
16	A16	70	77.8934	0.980716	0.086709
16	A16	71	78.1504	0.96728	0.101294
16	A16	72	78.4075	0.960044	0.12451
16	A16	73	78.6646	0.949346	0.15902
16	A16	74	78.9217	0.937533	0.206861
16	A16	75	79.1788	0.915497	0.268504
16	A16	76	79.4359	0.891064	0.341969
16	A16	77	79.693	0.843599	0.422404
16	A16	78	79.9501	0.781275	0.502374
16	A16	79	80.2072	0.696059	0.572948
16	A16	80	80.4642	0.586844	0.625287
16	A16	81	80.7213	0.483042	0.652306
16	A16	82	80.9784	0.37511	0.649971
16	A16	83	81.2355	0.270105	0.618
16	A16	84	81.4926	0.174759	0.559916
16	A16	85	81.7497	0.0960563	0.482476
16	A16	86	82.0068	0.0427829	0.394532
16	A16	87	82.2639	0.0122087	0.305458
16	A16	88	82.5209	-0.00108873	0.223463
16	A16	89	82.778	-0.00643845	0.154263
16	A16	90	83.0351	-0.00881	0.100478
16	A16	91	83.2922	-0.00940023	0.0618766
16	A16	92	83.5493	-0.0102436	0.0362464
16	A16	93	83.8064	-0.0101373	0.0204711
16	A16	94	84.0635	-0.0108272	0.0114475
16	A16	95	84.3206	-0.0116083	0.00663335
16	A16	96	84.5776	-0.0114126	0.00422557
16	A16	97	84.8347	-0.0114888	0.00308705
16	A16	98	85.0918	-0.0120973	0.00256734
16	A16	99	85.3489	-0.0122012	0.00232335
16	A16	100	85.606	-0.012859	0.00218744
16	A16	101	85.8631	-0.0129161	0.00208541
16	A16	102	86.1202	-0.0133856	0.00198802
16	A16	103	86.3773	-0.0131135	0.0018829
16	A16	104	86.6343	-0.0133136	0.00176272
16	A16	105	86.8914	-0.0143757	0.00162683
16	A16	106	87.1485	-0.0143007	0.00148838
16	A16	107	87.4056	-0.0143036	0.00137471
16	A16	108	87.6627	-0.014272	0.00131499
16	A16	109	87.9198	-0.0144145	0.00132131
16	A16	110	88.1769	-0.0144584	0.00137739
16	A16	111	88.434	-0.0153323	0.00144454
16	A16	112	88.691	-0.0150566	0.00148178
16	A16	113	88.9481	-0.015795	0.00146622
16	A16	114	89.2052	-0.0156042	0.00140033
16	A16	115	89.4623	-0.0156572	0.00130333
16	A16	116	89.7194	-0.0157958	0.00119576
16	A16	117	89.9765	-0.016025	0.00109023
16	A16	118	90.2336	-0.0164018	0.000993818
16	A16	119	90.4907	-0.0165708	0.000916223
16	A16	120	90.7477	-0.0159506	0.000872611
16	A16	121	91.0048	-0.0163334	0.000876388
16	A16	122	91.2619	-0.0165809	0.000927799
16	A16	123	91.519	-0.0165546	0.00100887
16	A16	124	91.7761	-0.0169292	0.00108975
16	A16	125	92.0332	-0.017153	0.0011422
16	A16	126	92.2903	-0.0170802	0.00115158
16	A16	127	92.5474	-0.0176118	0.00112105
16	A16	128	92.8045	-0.0172633	0.00106706
16	A16	129	93.0615	-0.0178479	0.00100868
16	A16	130	93.3186	-0.0176115	0.000955845
16	A16	131	93.5757	-0.0174499	0.00090237
16	A16	132	93.8328	-0.0179675	0.000829523
16	A16	133	94.0899	-0.0185533	0.000719764
16	A16	134	94.347	-0.0182807	0.000572117
16	A16	135	94.6041	-0.0181414	0.00040713
16	A16	136	94.8612	-0.0177891	0.000256586
17	A17	1	60.1543	1.61851	0.0726831
17	A17	2	60.4114	1.60874	0.0732184
17	A17	3	60.6685	1.60219	0.0736288
17	A17	4	60.9256	1.58965	0.0737744
17	A17	5	61.1827	1.58348	0.0735981
17	A17	6	61.4397	1.57202	0.0731398
17	A17	7	61.6968	1.5634	0.0725324
17	A17	8	61.9539	1.55344	0.071965
17	A17	9	62.211	1.5416	0.0716256
17	A17	10	62.4681	1.53878	0.0716302
17	A17	11	62.7252	1.5276	0.0719717
17	A17	12	62.9823	1.51665	0.0725292
17	A17	13	63.2394	1.50892	0.0731305
17	A17	14	63.4964	1.49867	0.0736364
17	A17	15	63.7535	1.48588	0.0739894
17	A17	16	64.0106	1.48182	0.0742022
17	A17	17	64.2677	1.46743	0.0743046
17	A17	18	64.5248	1.46032	0.0742976
17	A17	19	64.7819	1.45229	0.0741512
17	A17	20	65.039	1.4392	0.0738483
17	A17	21	65.2961	1.42884	0.0734304
17	A17	22	65.5531	1.42085	0.0730063
17	A17	23	65.8102	1.41301	0.0727015
17	A17	24	66.0673	1.40292	0.0725898
17	A17	25	66.3244	1.39063	0.0726414
17	A17	26	66.5815	1.3886	0.0727373
17	A17	27	66.8386	1.37399	0.0727359
17	A17	28	67.0957	1.36249	0.0725574
17	A17	29	67.3528	1.35474	0.0722286
17	A17	30	67.6098	1.3485	0.0718621
17	A17	31	67.8669	1.33465	0.0715821
17	A17	32	68.124	1.32834	0.0714508
17	A17	33	68.3811	1.32124	0.0714378
17	A17	34	68.6382	1.30917	0.0714523
17	A17	35	68.8953	1.3002	0.0714101
17	A17	36	69.1524	1.28956	0.0712908
17	A17	37	69.4095	1.28371	0.071139
17	A17	38	69.6665	1.27145	0.0710313
17	A17	39	69.9236	1.26427	0.0710238
17	A17	40	70.1807	1.25681	0.0711196
17	A17	41	70.4378	1.24386	0.0712718
17	A17	42	70.6949	1.23547	0.0714052
17	A17	43	70.952	1.22888	0.0714455
17	A17	44	71.2091	1.21886	0.071347
17	A17	45	71.4662	1.2048	0.0711039
17	A17	46	71.7233	1.19913	0.0707415
17	A17	47	71.9803	1.19175	0.0702935
17	A17	48	72.2374	1.17996	0.0697835
17	A17	49	72.4945	1.17308	0.0692424
17	A17	50	72.7516	1.16182	0.0687389
17	A17	51	73.0087	1.15212	0.0683859
17	A17	52	73.2658	1.14583	0.0682899
17	A17	53	73.5229	1.13782	0.0684654
17	A17	54	73.78	1.13081	0.0687882
17	A17	55	74.037	1.11873	0.069041
17	A17	56	74.2941	1.10955	0.0690363
17	A17	57	74.5512	1.09974	0.0687372
17	A17	58	74.8083	1.09061	0.0682822
17	A17	59	75.0654	1.08197	0.0679028
17	A17	60	75.3225	1.07682	0.0677893
17	A17	61	75.5796	1.0671	0.0679964
17	A17	62	75.8367	1.05827	0.0684341
17	A17	63	76.0937	1.04567	0.0689414
17	A17	64	76.3508	1.04029	0.0693808
17	A17	65	76.6079	1.03306	0.0697338
17	A17	66	76.865	1.01894	0.0701834
17	A17	67	77.1221	1.01125	0.0711997
17	A17	68	77.3792	1.00179	0.0736133
17	A17	69	77.6363	0.995375	0.0786773
17	A17	70	77.8934	0.988757	0.0881078
17	A17	71	78.1504	0.975332	0.104072
17	A17	72	78.4075	0.966341	0.12904
17	A17	73	78.6646	0.955563	0.165409
17	A17	74	78.9217	0.945283	0.214842
17	A17	75	79.1788	0.91966	0.27744
17	A17	76	79.4359	0.889118	0.350987
17	A17	77	79.693	0.843391	0.43059
17	A17	78	79.9501	0.779964	0.508976
17	A17	79	80.2072	0.695016	0.577509
17	A17	80	80.4642	0.58492	0.627706
17	A17	81	80.7213	0.480173	0.65282
17	A17	82	80.9784	0.374416	0.64909
17	A17	83	81.2355	0.272779	0.616376
17	A17	84	81.4926	0.176532	0.558185
17	A17	85	81.7497	0.0995876	0.481109
17	A17	86	82.0068	0.0450364	0.393752
17	A17	87	82.2639	0.0149265	0.305247
17	A17	88	82.5209	0.000880476	0.223646
17	A17	89	82.778	-0.00414299	0.154612
17	A17	90	83.0351	-0.00666366	0.100799
17	A17	91	83.2922	-0.00759488	0.0620545
17	A17	92	83.5493	-0.00777115	0.0362463
17	A17	93	83.8064	-0.00822068	0.0203227
17	A17	94	84.0635	-0.00843581	0.0112179
17	A17	95	84.3206	-0.00900366	0.00640165
17	A17	96	84.5776	-0.00902932	0.00406319
17	A17	97	84.8347	-0.00903384	0.00304439
17	A17	98	85.0918	-0.00958651	0.0026656
17	A17	99	85.3489	-0.00982687	0.00255098
17	A17	100	85.606	-0.0101573	0.00250297
17	A17	101	85.8631	-0.0109683	0.00242932
17	A17	102	86.1202	-0.0111426	0.00230243
17	A17	103	86.3773	-0.0114298	0.00213066
17	A17	104	86.6343	-0.0114358	0.00193335
17	A17	105	86.8914	-0.0115385	0.00172411
17	A17	106	87.1485	-0.0121046	0.00150942
17	A17	107	87.4056	-0.0125239	0.00129951
17	A17	108	87.6627	-0.0126792	0.00111784
17	A17	109	87.9198	-0.0122738	0.000995703
17	A17	110	88.1769	-0.011626	0.000953201
17	A17	111	88.434	-0.0127818	0.000982988
17	A17	112	88.691	-0.013038	0.00105209
17	A17	113	88.9481	-0.0131572	0.00112104
17	A17	114	89.2052	-0.0126197	0.00116465
17	A17	115	89.4623	-0.0132595	0.00118028
17	A17	116	89.7194	-0.0136889	0.00118178
17	A17	117	89.9765	-0.01371	0.00118728
17	A17	118	90.2336	-0.0131339	0.00120794
17	A17	119	90.4907	-0.0137838	0.00124139
17	A17	120	90.7477	-0.0143719	0.00127193
17	A17	121	91.0048	-0.0140103	0.00127843
17	A17	122	91.2619	-0.0143945	0.00124703
17	A17	123	91.519	-0.0149295	0.00118096
17	A17	124	91.7761	-0.0145592	0.00110037
17	A17	125	92.0332	-0.0147841	0.00103134
17	A17	126	92.2903	-0.0144757	0.000991062
17	A17	127	92.5474	-0.0150952	0.000979275
17	A17	128	92.8045	-0.015272	0.000980616
17	A17	129	93.0615	-0.0155031	0.000974238
17	A17	130	93.3186	-0.0151025	0.000942819
17	A17	131	93.5757	-0.015277	0.000876797
17	A17	132	93.8328	-0.0161174	0.000775538
17	A17	133	94.0899	-0.0159088	0.000647933
17	A17	134	94.347	-0.0156447	0.00051096
17	A17	135	94.6041	-0.015349	0.000383826
17	A17	136	94.8612	-0.016084	0.000279753
18	A18	1	60.1543	1.65715	0.075003
18	A18	2	60.4114	1.65089	0.0756029
18	A18	3	60.6685	1.64096	0.0761575
18	A18	4	60.9256	1.63287	0.0764879
18	A18	5	61.1827	1.62129	0.0764853
18	A18	6	61.4397	1.61201	0.0761633
18	A18	7	61.6968	1.60284	0.0756522
18	A18	8	61.9539	1.58938	0.0751386
18	A18	9	62.211	1.5844	0.0747745
18	A18	10	62.4681	1.57748	0.0746196
18	A18	11	62.7252	1.56353	0.0746427
18	A18	12	62.9823	1.55363	0.0747776
18	A18	13	63.2394	1.54584	0.0749718
18	A18	14	63.4964	1.53508	0.075193
18	A18	15	63.7535	1.52651	0.0753987
18	A18	16	64.0106	1.52007	0.0755147
18	A18	17	64.2677	1.50291	0.0754603
18	A18	18	64.5248	1.49954	0.0752049
18	A18	19	64.7819	1.48499	0.0748072
18	A18	20	65.039	1.47683	0.0743955
18	A18	21	65.2961	1.46991	0.0741136
18	A18	22	65.5531	1.45907	0.0740512
18	A18	23	65.8102	1.44913	0.0742139
18	A18	24	66.0673	1.43984	0.0745272
18	A18	25	66.3244	1.43206	0.0748702
18	A18	26	66.5815	1.42027	0.0751204
18	A18	27	66.8386	1.41302	0.0752013
18	A18	28	67.0957	1.39912	0.0751064
18	A18	29	67.3528	1.39032	0.0748956
18	A18	30	67.6098	1.38573	0.0746567
18	A18	31	67.8669	1.37264	0.0744672
18	A18	32	68.124	1.36115	0.0743662
18	A18	33	68.3811	1.35606	0.0743599
18	A18	34	68.6382	1.34474	0.0744218
18	A18	35	68.8953	1.33513	0.0745023
18	A18	36	69.1524	1.32561	0.074532
18	A18	37	69.4095	1.31765	0.0744465
18	A18	38	69.6665	1.30626	0.0742142
18	A18	39	69.9236	1.29615	0.0738551
18	A18	40	70.1807	1.28749	0.0734278
18	A18	41	70.4378	1.27837	0.0729905
18	A18	42	70.6949	1.27062	0.0725576
18	A18	43	70.952	1.25943	0.0720939
18	A18	44	71.2091	1.2511	0.0715446
18	A18	45	71.4662	1.23937	0.0708892
18	A18	46	71.7233	1.23416	0.0701801
18	A18	47	71.9803	1.22209	0.0695399
18	A18	48	72.2374	1.2152	0.0691177
18	A18	49	72.4945	1.20352	0.0690184
18	A18	50	72.7516	1.20074	0.0692451
18	A18	51	73.0087	1.19039	0.0696927
18	A18	52	73.2658	1.17992	0.0702042
18	A18	53	73.5229	1.16692	0.0706497
18	A18	54	73.78	1.16448	0.0709655
18	A18	55	74.037	1.15084	0.0711449
18	A18	56	74.2941	1.14454	0.071195
18	A18	57	74.5512	1.13622	0.0711239
18	A18	58	74.8083	1.12258	0.0709585
18	A18	59	75.0654	1.11389	0.0707623
18	A18	60	75.3225	1.10808	0.0706135
18	A18	61	75.5796	1.09945	0.0705586
18	A18	62	75.8367	1.09092	0.0705909
18	A18	63	76.0937	1.07721	0.0706801
18	A18	64	76.3508	1.07014	0.0708283
18	A18	65	76.6079	1.06353	0.0711122
18	A18	66	76.865	1.05236	0.0717211
18	A18	67	77.1221	1.04588	0.0730174
18	A18	68	77.3792	1.03269	0.0756603
18	A18	69	77.6363	1.02599	0.0807655
18	A18	70	77.8934	1.01556	0.0900234
18	A18	71	78.1504	1.00851	0.105697
18	A18	72	78.4075	0.998184	0.130417
18	A18	73	78.6646	0.986305	0.166732
18	A18	74	78.9217	0.973237	0.216417
18	A18	75	79.1788	0.951872	0.279636
18	A18	76	79.4359	0.922779	0.354188
18	A18	77	79.693	0.875506	0.435142
18	A18	78	79.9501	0.810635	0.515113
18	A18	79	80.2072	0.721788	0.585257
18	A18	80	80.4642	0.627014	0.636773
18	A18	81	80.7213	0.50922	0.662555
18	A18	82	80.9784	0.403561	0.658553
18	A18	83	81.2355	0.299823	0.624566
18	A18	84	81.4926	0.206373	0.564328
18	A18	85	81.7497	0.128916	0.484876
18	A18	86	82.0068	0.0760343	0.395312
18	A18	87	82.2639	0.046963	0.30515
18	A18	88	82.5209	0.0339457	0.222614
18	A18	89	82.778	0.0294796	0.153327
18	A18	90	83.0351	0.0274022	0.0997608
18	A18	91	83.2922	0.0259242	0.0615262
18	A18	92	83.5493	0.0258446	0.0362795
18	A18	93	83.8064	0.024952	0.020824
18	A18	94	84.0635	0.024598	0.0120279
18	A18	95	84.3206	0.0238404	0.00735864
18	A18	96	84.5776	0.0237285	0.00504019
18	A18	97	84.8347	0.0236659	0.00396215
18	A18	98	85.0918	0.0230577	0.00348963
18	A18	99	85.3489	0.02193	0.00328017
18	A18	100	85.606	0.022716	0.00315516
18	A18	101	85.8631	0.0218226	0.00302837
18	A18	102	86.1202	0.0209013	0.00287304
18	A18	103	86.3773	0.0203411	0.00270298
18	A18	104	86.6343	0.0208034	0.00255156
18	A18	105	86.8914	0.0207538	0.00244744
18	A18	106	87.1485	0.0200847	0.00239814
18	A18	107	87.4056	0.019309	0.00239127
18	A18	108	87.6627	0.0191598	0.00240963
18	A18	109	87.9198	0.0190534	0.0024443
18	A18	110	88.1769	0.0189988	0.00249395
18	A18	111	88.434	0.0183407	0.00255377
18	A18	112	88.691	0.0181557	0.00260781
18	A18	113	88.9481	0.0172583	0.00263371
18	A18	114	89.2052	0.0171917	0.00261563
18	A18	115	89.4623	0.0171965	0.00255367
18	A18	116	89.7194	0.0163045	0.00246254
18	A18	117	89.9765	0.016557	0.00236255
18	A18	118	90.2336	0.0159434	0.00227062
18	A18	119	90.4907	0.015957	0.00219699
18	A18	120	90.7477	0.0153165	0.0021463
18	A18	121	91.0048	0.0153184	0.00211913
18	A18	122	91.2619	0.015273	0.00211109
18	A18	123	91.519	0.0146398	0.00211088
18	A18	124	91.7761	0.0144301	0.00210099
18	A18	125	92.0332	0.0142957	0.00206322
18	A18	126	92.2903	0.0136692	0.00198712
18	A18	127	92.5474	0.013661	0.00187653
18	A18	128	92.8045	0.0133973	0.00174946
18	A18	129	93.0615	0.0135185	0.0016303
18	A18	130	93.3186	0.012835	0.00153724
18	A18	131	93.5757	0.0132598	0.00147068
18	A18	132	93.8328	0.0129438	0.00140918
18	A18	133	94.0899	0.0124343	0.00131747
18	A18	134	94.347	0.0123153	0.00116458
18	A18	135	94.6041	0.0117554	0.000942937
18	A18	136	94.8612	0.0121771	0.00067635
19	A19	1	60.1543	1.43443	0.137455
19	A19	2	60.4114	1.42196	0.138701
19	A19	3	60.6685	1.41152	0.139754
19	A19	4	60.9256	1.41439	0.140249
19	A19	5	61.1827	1.39318	0.139901
19	A19	6	61.4397	1.39391	0.138644
19	A19	7	61.6968	1.38126	0.136785
19	A19	8	61.9539	1.36701	0.135001
19	A19	9	62.211	1.36082	0.134092
19	A19	10	62.4681	1.36259	0.134546
19	A19	11	62.7252	1.35073	0.136217
19	A19	12	62.9823	1.34054	0.13834
19	A19	13	63.2394	1.33204	0.139932
19	A19	14	63.4964	1.32096	0.14029
19	A19	15	63.7535	1.30809	0.139305
19	A19	16	64.0106	1.30883	0.137441
19	A19	17	64.2677	1.29186	0.135478
19	A19	18	64.5248	1.2892	0.134173
19	A19	19	64.7819	1.27617	0.133991
19	A19	20	65.039	1.27481	0.134963
19	A19	21	65.2961	1.26562	0.136708
19	A19	22	65.5531	1.25283	0.138642
19	A19	23	65.8102	1.2462	0.140258
19	A19	24	66.0673	1.23703	0.141352
19	A19	25	66.3244	1.22395	0.142049
19	A19	26	66.5815	1.21986	0.142629
19	A19	27	66.8386	1.21222	0.143286
19	A19	28	67.0957	1.2025	0.144
19	A19	29	67.3528	1.18981	0.144571
19	A19	30	67.6098	1.18452	0.144778
19	A19	31	67.8669	1.173	0.144522
19	A19	32	68.124	1.16462	0.143879
19	A19	33	68.3811	1.15679	0.143069
19	A19	34	68.6382	1.14639	0.142371
19	A19	35	68.8953	1.13797	0.142014
19	A19	36	69.1524	1.12939	0.142081
19	A19	37	69.4095	1.12401	0.142485
19	A19	38	69.6665	1.11363	0.143044
19	A19	39	69.9236	1.10118	0.143612
19	A19	40	70.1807	1.09286	0.14417
19	A19	41	70.4378	1.08635	0.144788
19	A19	42	70.6949	1.07875	0.145493
19	A19	43	70.952	1.06628	0.146169
19	A19	44	71.2091	1.05882	0.146578
19	A19	45	71.4662	1.0497	0.146486
19	A19	46	71.7233	1.03801	0.145809
19	A19	47	71.9803	1.02954	0.144652
19	A19	48	72.2374	1.0216	0.143252
19	A19	49	72.4945	1.01413	0.141867
19	A19	50	72.7516	1.00229	0.140704
19	A19	51	73.0087	0.995992	0.139896
19	A19	52	73.2658	0.986479	0.139493
19	A19	53	73.5229	0.977564	0.139448
19	A19	54	73.78	0.970639	0.139587
19	A19	55	74.037	0.962215	0.139631
19	A19	56	74.2941	0.951818	0.139292
19	A19	57	74.5512	0.941447	0.138429
19	A19	58	74.8083	0.936041	0.137159
19	A19	59	75.0654	0.922749	0.135854
19	A19	60	75.3225	0.918916	0.135015
19	A19	61	75.5796	0.910073	0.13506
19	A19	62	75.8367	0.900245	0.136157
19	A19	63	76.0937	0.897285	0.138145
19	A19	64	76.3508	0.882686	0.140587
19	A19	65	76.6079	0.876019	0.142896
19	A19	66	76.865	0.867025	0.144489
19	A19	67	77.1221	0.85835	0.144917
19	A19	68	77.3792	0.845778	0.143986
19	A19	69	77.6363	0.839133	0.141814
19	A19	70	77.8934	0.826086	0.138805
19	A19	71	78.1504	0.821521	0.135537
19	A19	72	78.4075	0.814986	0.132592
19	A19	73	78.6646	0.80174	0.130423
19	A19	74	78.9217	0.798156	0.129284
19	A19	75	79.1788	0.789919	0.129256
19	A19	76	79.4359	0.781612	0.130309
19	A19	77	79.693	0.774096	0.132371
19	A19	78	79.9501	0.764146	0.135363
19	A19	79	80.2072	0.758258	0.139156
19	A19	80	80.4642	0.746839	0.14349
19	A19	81	80.7213	0.743166	0.1479
19	A19	82	80.9784	0.729415	0.151749
19	A19	83	81.2355	0.717725	0.154373
19	A19	84	81.4926	0.70977	0.155279
19	A19	85	81.7497	0.697832	0.154287
19	A19	86	82.0068	0.687603	0.15157
19	A19	87	82.2639	0.679459	0.147606
19	A19	88	82.5209	0.668714	0.143061
19	A19	89	82.778	0.660666	0.138672
19	A19	90	83.0351	0.654067	0.135106
19	A19	91	83.2922	0.645479	0.132835
19	A19	92	83.5493	0.637611	0.132029
19	A19	93	83.8064	0.630837	0.132538
19	A19	94	84.0635	0.624147	0.133971
19	A19	95	84.3206	0.610606	0.135864
19	A19	96	84.5776	0.605074	0.137832
19	A19	97	84.8347	0.595254	0.139634
19	A19	98	85.0918	0.586548	0.141125
19	A19	99	85.3489	0.580126	0.142165
19	A19	100	85.606	0.568582	0.142595
19	A19	101	85.8631	0.558616	0.142339
19	A19	102	86.1202	0.550733	0.141568
19	A19	103	86.3773	0.540949	0.140805
19	A19	104	86.6343	0.533176	0.140857
19	A19	105	86.8914	0.524277	0.142589
19	A19	106	87.1485	0.51457	0.146644
19	A19	107	87.4056	0.503715	0.153308
19	A19	108	87.6627	0.4948	0.16261
19	A19	109	87.9198	0.481947	0.174648
19	A19	110	88.1769	0.471288	0.189961
19	A19	111	88.434	0.458525	0.209771
19	A19	112	88.691	0.444982	0.235943
19	A19	113	88.9481	0.429641	0.270604
19	A19	114	89.2052	0.412277	0.315323
19	A19	115	89.4623	0.392971	0.369916
19	A19	116	89.7194	0.36763	0.431126
19	A19	117	89.9765	0.333103	0.491872
19	A19	118	90.2336	0.287959	0.541894
19	A19	119	90.4907	0.229431	0.570212
19	A19	120	90.7477	0.170952	0.568794
19	A19	121	91.0048	0.132665	0.535855
19	A19	122	91.2619	0.111912	0.477007
19	A19	123	91.519	0.101497	0.403519
19	A19	124	91.7761	0.0921611	0.328499
19	A19	125	92.0332	0.0847656	0.262897
19	A19	126	92.2903	0.0768947	0.213029
19	A19	127	92.5474	0.0687282	0.180214
19	A19	128	92.8045	0.0621361	0.161926
19	A19	129	93.0615	0.0538515	0.153448
19	A19	130	93.3186	0.043397	0.149335
19	A19	131	93.5757	0.0302094	0.144537
19	A19	132	93.8328	0.0161952	0.135312
19	A19	133	94.0899	0.00670411	0.11993
19	A19	134	94.347	0.00229921	0.0989518
19	A19	135	94.6041	0.00120036	0.0748566
19	A19	136	94.8612	0.00014038	0.0510497
20	A20	1	60.1543	1.48004	0.133822
20	A20	2	60.4114	1.46788	0.135145
20	A20	3	60.6685	1.45809	0.136027
20	A20	4	60.9256	1.45341	0.136115
20	A20	5	61.1827	1.4413	0.135305
20	A20	6	61.4397	1.43432	0.13383
20	A20	7	61.6968	1.42024	0.132192
20	A20	8	61.9539	1.41191	0.130952
20	A20	9	62.211	1.40916	0.130455
20	A20	10	62.4681	1.40079	0.130656
20	A20	11	62.7252	1.39082	0.131216
20	A20	12	62.9823	1.37886	0.131776
20	A20	13	63.2394	1.36526	0.132229
20	A20	14	63.4964	1.36501	0.132725
20	A20	15	63.7535	1.35269	0.133467
20	A20	16	64.0106	1.34653	0.134475
20	A20	17	64.2677	1.33376	0.135564
20	A20	18	64.5248	1.3291	0.136519
20	A20	19	64.7819	1.31116	0.137309
20	A20	20	65.039	1.30691	0.138107
20	A20	21	65.2961	1.29696	0.139104
20	A20	22	65.5531	1.29118	0.140261
20	A20	23	65.8102	1.27996	0.141237
20	A20	24	66.0673	1.26904	0.141574
20	A20	25	66.3244	1.25454	0.141001
20	A20	26	66.5815	1.25018	0.139641
20	A20	27	66.8386	1.23772	0.137974
20	A20	28	67.0957	1.23055	0.136592
20	A20	29	67.3528	1.22128	0.135921
20	A20	30	67.6098	1.21428	0.136065
20	A20	31	67.8669	1.20475	0.136818
20	A20	32	68.124	1.1918	0.137808
20	A20	33	68.3811	1.18569	0.138651
20	A20	34	68.6382	1.17638	0.139081
20	A20	35	68.8953	1.1658	0.139009
20	A20	36	69.1524	1.15451	0.138536
20	A20	37	69.4095	1.1464	0.137884
20	A20	38	69.6665	1.13758	0.137273
20	A20	39	69.9236	1.129	0.1368
20	A20	40	70.1807	1.12145	0.136408
20	A20	41	70.4378	1.11001	0.13596
20	A20	42	70.6949	1.09629	0.135361
20	A20	43	70.952	1.09422	0.134625
20	A20	44	71.2091	1.08209	0.133842
20	A20	45	71.4662	1.07324	0.133094
20	A20	46	71.7233	1.06336	0.132394
20	A20	47	71.9803	1.0566	0.131689
20	A20	48	72.2374	1.04517	0.130907
20	A20	49	72.4945	1.03947	0.130032
20	A20	50	72.7516	1.02717	0.129142
20	A20	51	73.0087	1.01706	0.128397
20	A20	52	73.2658	1.01572	0.127959
20	A20	53	73.5229	1.0007	0.12788
20	A20	54	73.78	0.995597	0.128035
20	A20	55	74.037	0.985174	0.128152
20	A20	56	74.2941	0.97892	0.127945
20	A20	57	74.5512	0.967282	0.127294
20	A20	58	74.8083	0.956903	0.126356
20	A20	59	75.0654	0.949515	0.125513
20	A20	60	75.3225	0.943259	0.125166
20	A20	61	75.5796	0.934569	0.125489
20	A20	62	75.8367	0.930112	0.126311
20	A20	63	76.0937	0.914659	0.127212
20	A20	64	76.3508	0.908388	0.12775
20	A20	65	76.6079	0.898336	0.127665
20	A20	66	76.865	0.891659	0.126952
20	A20	67	77.1221	0.881717	0.125806
20	A20	68	77.3792	0.87208	0.124507
20	A20	69	77.6363	0.86585	0.123304
20	A20	70	77.8934	0.856901	0.122342
20	A20	71	78.1504	0.847967	0.121618
20	A20	72	78.4075	0.842068	0.121001
20	A20	73	78.6646	0.832149	0.12032
20	A20	74	78.9217	0.822431	0.119479
20	A20	75	79.1788	0.815232	0.118549
20	A20	76	79.4359	0.808861	0.117754
20	A20	77	79.693	0.797051	0.117372
20	A20	78	79.9501	0.795109	0.117582
20	A20	79	80.2072	0.785545	0.118368
20	A20	80	80.4642	0.774931	0.119509
20	A20	81	80.7213	0.769558	0.120658
20	A20	82	80.9784	0.758391	0.121467
20	A20	83	81.2355	0.753819	0.121698
20	A20	84	81.4926	0.741002	0.12131
20	A20	85	81.7497	0.732506	0.120465
20	A20	86	82.0068	0.72556	0.119458
20	A20	87	82.2639	0.719862	0.118581
20	A20	88	82.5209	0.710817	0.118013
20	A20	89	82.778	0.701622	0.117777
20	A20	90	83.0351	0.693544	0.117792
20	A20	91	83.2922	0.686469	0.117944
20	A20	92	83.5493	0.678929	0.11813
20	A20	93	83.8064	0.670761	0.118275
20	A20	94	84.0635	0.660722	0.118355
20	A20	95	84.3206	0.654351	0.118415
20	A20	96	84.5776	0.64462	0.118574
20	A20	97	84.8347	0.639758	0.118986
20	A20	98	85.0918	0.629283	0.11977
20	A20	99	85.3489	0.62249	0.120949
20	A20	100	85.606	0.613036	0.122429
20	A20	101	85.8631	0.606984	0.124048
20	A20	102	86.1202	0.597306	0.125686
20	A20	103	86.3773	0.586934	0.127405
20	A20	104	86.6343	0.578866	0.12955
20	A20	105	86.8914	0.569408	0.132721
20	A20	106	87.1485	0.558246	0.137601
20	A20	107	87.4056	0.54949	0.144756
20	A20	108	87.6627	0.539305	0.154542
20	A20	109	87.9198	0.528042	0.167247
20	A20	110	88.1769	0.514139	0.183408
20	A20	111	88.434	0.500164	0.204155
20	A20	112	88.691	0.486928	0.231336
20	A20	113	88.9481	0.470127	0.267231
20	A20	114	89.2052	0.453032	0.313709
20	A20	115	89.4623	0.42978	0.370883
20	A20	116	89.7194	0.403287	0.435624
20	A20	117	89.9765	0.367654	0.500657
20	A20	118	90.2336	0.313701	0.555153
20	A20	119	90.4907	0.249246	0.587255
20	A20	120	90.7477	0.182439	0.587955
20	A20	121	91.0048	0.137344	0.55467
20	A20	122	91.2619	0.114021	0.492655
20	A20	123	91.519	0.10034	0.413389
20	A20	124	91.7761	0.0919086	0.330711
20	A20	125	92.0332	0.0844178	0.25661
20	A20	126	92.2903	0.0785156	0.198464
20	A20	127	92.5474	0.0732071	0.158419
20	A20	128	92.8045	0.0672011	0.134426
20	A20	129	93.0615	0.0603792	0.121956
20	A20	130	93.3186	0.0516341	0.115616
20	A20	131	93.5757	0.0404074	0.110423
20	A20	132	93.8328	0.0287457	0.102714
20	A20	133	94.0899	0.0209487	0.0907204
20	A20	134	94.347	0.0184089	0.0746814
20	A20	135	94.6041	0.0171284	0.0564162
20	A20	136	94.8612	0.0156507	0.0384667
21	A21	1	60.1543	1.4286	0.136135
21	A21	2	60.4114	1.42367	0.136401
21	A21	3	60.6685	1.41677	0.137123
21	A21	4	60.9256	1.40875	0.138183
21	A21	5	61.1827	1.4011	0.139312
21	A21	6	61.4397	1.39222	0.140227
21	A21	7	61.6968	1.37758	0.140775
21	A21	8	61.9539	1.37063	0.140987
21	A21	9	62.211	1.36397	0.141004
21	A21	10	62.4681	1.35591	0.140938
21	A21	11	62.7252	1.34251	0.140811
21	A21	12	62.9823	1.33785	0.140593
21	A21	13	63.2394	1.32097	0.140282
21	A21	14	63.4964	1.32099	0.139942
21	A21	15	63.7535	1.30596	0.139674
21	A21	16	64.0106	1.3014	0.139575
21	A21	17	64.2677	1.28823	0.139728
21	A21	18	64.5248	1.28171	0.140191
21	A21	19	64.7819	1.26952	0.140953
21	A21	20	65.039	1.26725	0.141886
21	A21	21	65.2961	1.25231	0.142751
21	A21	22	65.5531	1.24524	0.143311
21	A21	23	65.8102	1.23331	0.143474
21	A21	24	66.0673	1.22409	0.143375
21	A21	25	66.3244	1.21568	0.143292
21	A21	26	66.5815	1.20809	0.143459
21	A21	27	66.8386	1.19776	0.143894
21	A21	28	67.0957	1.18994	0.144375
21	A21	29	67.3528	1.17905	0.144566
21	A21	30	67.6098	1.16833	0.144229
21	A21	31	67.8669	1.15988	0.143372
21	A21	32	68.124	1.14983	0.142255
21	A21	33	68.3811	1.14128	0.141257
21	A21	34	68.6382	1.13248	0.140668
21	A21	35	68.8953	1.12477	0.140532
21	A21	36	69.1524	1.11732	0.140644
21	A21	37	69.4095	1.10483	0.140674
21	A21	38	69.6665	1.09545	0.140357
21	A21	39	69.9236	1.08748	0.139628
21	A21	40	70.1807	1.07743	0.138616
21	A21	41	70.4378	1.0708	0.13755
21	A21	42	70.6949	1.05872	0.136633
21	A21	43	70.952	1.05304	0.135967
21	A21	44	71.2091	1.04273	0.135544
21	A21	45	71.4662	1.03457	0.135298
21	A21	46	71.7233	1.02606	0.135171
21	A21	47	71.9803	1.01561	0.135166
21	A21	48	72.2374	1.00747	0.135345
21	A21	49	72.4945	1.00059	0.135771
21	A21	50	72.7516	0.991165	0.136439
21	A21	51	73.0087	0.980354	0.137242
21	A21	52	73.2658	0.974676	0.137977
21	A21	53	73.5229	0.963808	0.138407
21	A21	54	73.78	0.953634	0.13834
21	A21	55	74.037	0.946608	0.137687
21	A21	56	74.2941	0.935277	0.136498
21	A21	57	74.5512	0.928093	0.134958
21	A21	58	74.8083	0.919	0.133334
21	A21	59	75.0654	0.908426	0.131889
21	A21	60	75.3225	0.902921	0.130781
21	A21	61	75.5796	0.895772	0.130005
21	A21	62	75.8367	0.884854	0.12942
21	A21	63	76.0937	0.877037	0.12886
21	A21	64	76.3508	0.867258	0.128249
21	A21	65	76.6079	0.861096	0.127648
21	A21	66	76.865	0.851245	0.127193
21	A21	67	77.1221	0.845266	0.126988
21	A21	68	77.3792	0.835525	0.127013
21	A21	69	77.6363	0.827845	0.127115
21	A21	70	77.8934	0.820751	0.127097
21	A21	71	78.1504	0.809751	0.126823
21	A21	72	78.4075	0.800849	0.126298
21	A21	73	78.6646	0.794856	0.125652
21	A21	74	78.9217	0.787298	0.125059
21	A21	75	79.1788	0.777501	0.124644
21	A21	76	79.4359	0.770543	0.124431
21	A21	77	79.693	0.761802	0.124339
21	A21	78	79.9501	0.754839	0.124229
21	A21	79	80.2072	0.74664	0.123951
21	A21	80	80.4642	0.737173	0.123412
21	A21	81	80.7213	0.729062	0.122609
21	A21	82	80.9784	0.722538	0.121638
21	A21	83	81.2355	0.713472	0.120669
21	A21	84	81.4926	0.706646	0.119883
21	A21	85	81.7497	0.697708	0.119422
21	A21	86	82.0068	0.691713	0.119349
21	A21	87	82.2639	0.682974	0.119627
21	A21	88	82.5209	0.675585	0.120128
21	A21	89	82.778	0.667259	0.120667
21	A21	90	83.0351	0.66106	0.121067
21	A21	91	83.2922	0.650639	0.121223
21	A21	92	83.5493	0.641336	0.121127
21	A21	93	83.8064	0.637567	0.120845
21	A21	94	84.0635	0.627951	0.120472
21	A21	95	84.3206	0.621455	0.12013
21	A21	96	84.5776	0.609564	0.12002
21	A21	97	84.8347	0.604648	0.120448
21	A21	98	85.0918	0.597322	0.121751
21	A21	99	85.3489	0.589814	0.124107
21	A21	100	85.606	0.583197	0.127349
21	A21	101	85.8631	0.575335	0.13095
21	A21	102	86.1202	0.564687	0.134255
21	A21	103	86.3773	0.553165	0.136861
21	A21	104	86.6343	0.543564	0.138904
21	A21	105	86.8914	0.535236	0.141072
21	A21	106	87.1485	0.524502	0.144332
21	A21	107	87.4056	0.51595	0.149587
21	A21	108	87.6627	0.503706	0.157508
21	A21	109	87.9198	0.495431	0.168663
21	A21	110	88.1769	0.481919	0.183836
21	A21	111	88.434	0.469522	0.204312
21	A21	112	88.691	0.45666	0.231912
21	A21	113	88.9481	0.440129	0.268634
21	A21	114	89.2052	0.423194	0.315815
21	A21	115	89.4623	0.402136	0.372896
21	A21	116	89.7194	0.373971	0.436133
21	A21	117	89.9765	0.33824	0.497972
21	A21	118	90.2336	0.288916	0.547872
21	A21	119	90.4907	0.227056	0.574898
21	A21	120	90.7477	0.167584	0.571405
21	A21	121	91.0048	0.128273	0.536182
21	A21	122	91.2619	0.108213	0.475374
21	A21	123	91.519	0.09667	0.400569
21	A21	124	91.7761	0.0869215	0.324951
21	A21	125	92.0332	0.078803	0.259397
21	A21	126	92.2903	0.072258	0.210116
21	A21	127	92.5474	0.0645983	0.178319
21	A21	128	92.8045	0.0568406	0.161331
21	A21	129	93.0615	0.0477791	0.154203
21	A21	130	93.3186	0.036754	0.151207
21	A21	131	93.5757	0.022075	0.147058
21	A21	132	93.8328	0.00704678	0.137936
21	A21	133	94.0899	-0.00284194	0.122213
21	A21	134	94.347	-0.00615097	0.10067
21	A21	135	94.6041	-0.00824077	0.0760079
21	A21	136	94.8612	-0.00918074	0.0517682
22	A22	1	60.1543	1.41816	0.157781
22	A22	2	60.4114	1.41355	0.157587
22	A22	3	60.6685	1.40621	0.157063
22	A22	4	60.9256	1.39664	0.156278
22	A22	5	61.1827	1.38639	0.155505
22	A22	6	61.4397	1.38121	0.155132
22	A22	7	61.6968	1.3715	0.155485
22	A22	8	61.9539	1.36582	0.156653
22	A22	9	62.211	1.35364	0.158428
22	A22	10	62.4681	1.34737	0.160372
22	A22	11	62.7252	1.33928	0.161998
22	A22	12	62.9823	1.32611	0.162993
22	A22	13	63.2394	1.32023	0.163363
22	A22	14	63.4964	1.30686	0.163441
22	A22	15	63.7535	1.30037	0.163728
22	A22	16	64.0106	1.29412	0.164616
22	A22	17	64.2677	1.28401	0.166182
22	A22	18	64.5248	1.27308	0.168128
22	A22	19	64.7819	1.26605	0.169927
22	A22	20	65.039	1.25609	0.171068
22	A22	21	65.2961	1.24419	0.171302
22	A22	22	65.5531	1.23284	0.170729
22	A22	23	65.8102	1.22657	0.169749
22	A22	24	66.0673	1.21815	0.168848
22	A22	25	66.3244	1.20596	0.168382
22	A22	26	66.5815	1.19898	0.168433
22	A22	27	66.8386	1.19002	0.168807
22	A22	28	67.0957	1.18198	0.16917
22	A22	29	67.3528	1.16929	0.169232
22	A22	30	67.6098	1.16012	0.168893
22	A22	31	67.8669	1.15098	0.168236
22	A22	32	68.124	1.14154	0.167422
22	A22	33	68.3811	1.13825	0.166581
22	A22	34	68.6382	1.12262	0.165806
22	A22	35	68.8953	1.11264	0.165196
22	A22	36	69.1524	1.10665	0.164869
22	A22	37	69.4095	1.09746	0.164859
22	A22	38	69.6665	1.09111	0.165002
22	A22	39	69.9236	1.08049	0.164963
22	A22	40	70.1807	1.06733	0.164409
22	A22	41	70.4378	1.0601	0.163227
22	A22	42	70.6949	1.05232	0.161616
22	A22	43	70.952	1.04226	0.160004
22	A22	44	71.2091	1.03464	0.158867
22	A22	45	71.4662	1.02389	0.158563
22	A22	46	71.7233	1.01948	0.159224
22	A22	47	71.9803	1.00872	0.160719
22	A22	48	72.2374	0.99899	0.162663
22	A22	49	72.4945	0.99061	0.16448
22	A22	50	72.7516	0.985194	0.165568
22	A22	51	73.0087	0.968633	0.165506
22	A22	52	73.2658	0.963297	0.164273
22	A22	53	73.5229	0.950887	0.162304
22	A22	54	73.78	0.941889	0.160299
22	A22	55	74.037	0.93914	0.158869
22	A22	56	74.2941	0.926861	0.158212
22	A22	57	74.5512	0.921946	0.158051
22	A22	58	74.8083	0.909631	0.15787
22	A22	59	75.0654	0.899298	0.157275
22	A22	60	75.3225	0.889989	0.156235
22	A22	61	75.5796	0.885928	0.155048
22	A22	62	75.8367	0.875072	0.15411
22	A22	63	76.0937	0.866432	0.153656
22	A22	64	76.3508	0.859499	0.153651
22	A22	65	76.6079	0.851857	0.153845
22	A22	66	76.865	0.840509	0.153937
22	A22	67	77.1221	0.833197	0.153731
22	A22	68	77.3792	0.82227	0.1532
22	A22	69	77.6363	0.819054	0.152456
22	A22	70	77.8934	0.806855	0.151665
22	A22	71	78.1504	0.797367	0.150955
22	A22	72	78.4075	0.79184	0.150363
22	A22	73	78.6646	0.783653	0.149815
22	A22	74	78.9217	0.774749	0.149183
22	A22	75	79.1788	0.765183	0.148374
22	A22	76	79.4359	0.757096	0.147413
22	A22	77	79.693	0.749699	0.146457
22	A22	78	79.9501	0.741435	0.145715
22	A22	79	80.2072	0.736016	0.145321
22	A22	80	80.4642	0.724999	0.145263
22	A22	81	80.7213	0.717635	0.145389
22	A22	82	80.9784	0.710935	0.14549
22	A22	83	81.2355	0.702287	0.145396
22	A22	84	81.4926	0.692188	0.145041
22	A22	85	81.7497	0.685037	0.144476
22	A22	86	82.0068	0.677446	0.143816
22	A22	87	82.2639	0.67115	0.143186
22	A22	88	82.5209	0.660681	0.14268
22	A22	89	82.778	0.652922	0.142351
22	A22	90	83.0351	0.646376	0.142225
22	A22	91	83.2922	0.638723	0.142287
22	A22	92	83.5493	0.630231	0.142473
22	A22	93	83.8064	0.623098	0.142701
22	A22	94	84.0635	0.613729	0.142933
22	A22	95	84.3206	0.605683	0.143225
22	A22	96	84.5776	0.598425	0.143724
22	A22	97	84.8347	0.59253	0.144583
22	A22	98	85.0918	0.582192	0.145859
22	A22	99	85.3489	0.575063	0.147462
22	A22	100	85.606	0.566812	0.149189
22	A22	101	85.8631	0.559513	0.150827
22	A22	102	86.1202	0.548802	0.152315
22	A22	103	86.3773	0.541113	0.153861
22	A22	104	86.6343	0.532345	0.155967
22	A22	105	86.8914	0.522759	0.159301
22	A22	106	87.1485	0.513424	0.164503
22	A22	107	87.4056	0.502736	0.172037
22	A22	108	87.6627	0.492343	0.182246
22	A22	109	87.9198	0.482589	0.195569
22	A22	110	88.1769	0.470363	0.212817
22	A22	111	88.434	0.458976	0.235291
22	A22	112	88.691	0.444221	0.264653
22	A22	113	88.9481	0.428603	0.302468
22	A22	114	89.2052	0.412312	0.349394
22	A22	115	89.4623	0.391947	0.404121
22	A22	116	89.7194	0.364739	0.462403
22	A22	117	89.9765	0.331897	0.51683
22	A22	118	90.2336	0.288207	0.557934
22	A22	119	90.4907	0.239478	0.576721
22	A22	120	90.7477	0.192757	0.567829
22	A22	121	91.0048	0.163153	0.531868
22	A22	122	91.2619	0.14571	0.475682
22	A22	123	91.519	0.133723	0.410275
22	A22	124	91.7761	0.123219	0.34741
22	A22	125	92.0332	0.113114	0.296436
22	A22	126	92.2903	0.10346	0.262488
22	A22	127	92.5474	0.0949763	0.246203
22	A22	128	92.8045	0.0837259	0.244393
22	A22	129	93.0615	0.0709326	0.251069
22	A22	130	93.3186	0.0532617	0.25866
22	A22	131	93.5757	0.0297536	0.25959
22	A22	132	93.8328	0.00513595	0.248171
22	A22	133	94.0899	-0.0102076	0.222296
22	A22	134	94.347	-0.0154325	0.184135
22	A22	135	94.6041	-0.0174352	0.139333
22	A22	136	94.8612	-0.018654	0.0949448
23	A23	1	60.1543	1.4307	0.149473
23	A23	2	60.4114	1.42369	0.149701
23	A23	3	60.6685	1.41304	0.150081
23	A23	4	60.9256	1.40884	0.150596
23	A23	5	61.1827	1.40102	0.151172
23	A23	6	61.4397	1.39041	0.151699
23	A23	7	61.6968	1.37846	0.152093
23	A23	8	61.9539	1.37103	0.152344
23	A23	9	62.211	1.36385	0.152489
23	A23	10	62.4681	1.35456	0.152545
23	A23	11	62.7252	1.34406	0.152478
23	A23	12	62.9823	1.33556	0.15225
23	A23	13	63.2394	1.32545	0.151906
23	A23	14	63.4964	1.31805	0.151606
23	A23	15	63.7535	1.30555	0.151577
23	A23	16	64.0106	1.30186	0.152024
23	A23	17	64.2677	1.29239	0.153062
23	A23	18	64.5248	1.27994	0.154707
23	A23	19	64.7819	1.27116	0.156859
23	A23	20	65.039	1.26448	0.159278
23	A23	21	65.2961	1.25623	0.161567
23	A23	22	65.5531	1.24299	0.163241
23	A23	23	65.8102	1.23315	0.163915
23	A23	24	66.0673	1.22294	0.163497
23	A23	25	66.3244	1.2133	0.162271
23	A23	26	66.5815	1.20181	0.160782
23	A23	27	66.8386	1.19545	0.15957
23	A23	28	67.0957	1.18752	0.158925
23	A23	29	67.3528	1.17489	0.15879
23	A23	30	67.6098	1.16983	0.15886
23	A23	31	67.8669	1.15621	0.158797
23	A23	32	68.124	1.14618	0.158437
23	A23	33	68.3811	1.13835	0.157842
23	A23	34	68.6382	1.1312	0.157205
23	A23	35	68.8953	1.11777	0.15669
23	A23	36	69.1524	1.1119	0.156311
23	A23	37	69.4095	1.104	0.155929
23	A23	38	69.6665	1.09012	0.155353
23	A23	39	69.9236	1.08382	0.154486
23	A23	40	70.1807	1.07381	0.15341
23	A23	41	70.4378	1.06328	0.152389
23	A23	42	70.6949	1.05636	0.151755
23	A23	43	70.952	1.04784	0.151765
23	A23	44	71.2091	1.03832	0.152468
23	A23	45	71.4662	1.02892	0.153641
23	A23	46	71.7233	1.02127	0.154838
23	A23	47	71.9803	1.01174	0.155528
23	A23	48	72.2374	1.00225	0.155311
23	A23	49	72.4945	0.988125	0.1541
23	A23	50	72.7516	0.981873	0.152159
23	A23	51	73.0087	0.973786	0.149967
23	A23	52	73.2658	0.964714	0.147994
23	A23	53	73.5229	0.957944	0.146544
23	A23	54	73.78	0.946555	0.145729
23	A23	55	74.037	0.940037	0.145556
23	A23	56	74.2941	0.928704	0.145993
23	A23	57	74.5512	0.923324	0.146979
23	A23	58	74.8083	0.9166	0.148383
23	A23	59	75.0654	0.902309	0.149978
23	A23	60	75.3225	0.894693	0.151447
23	A23	61	75.5796	0.888106	0.152432
23	A23	62	75.8367	0.877905	0.152595
23	A23	63	76.0937	0.869003	0.151747
23	A23	64	76.3508	0.855324	0.149952
23	A23	65	76.6079	0.848403	0.147552
23	A23	66	76.865	0.840491	0.145042
23	A23	67	77.1221	0.83623	0.142851
23	A23	68	77.3792	0.822865	0.14118
23	A23	69	77.6363	0.815949	0.139996
23	A23	70	77.8934	0.808773	0.139143
23	A23	71	78.1504	0.799475	0.138477
23	A23	72	78.4075	0.789863	0.13791
23	A23	73	78.6646	0.784345	0.137393
23	A23	74	78.9217	0.775169	0.136864
23	A23	75	79.1788	0.768204	0.136253
23	A23	76	79.4359	0.756688	0.135536
23	A23	77	79.693	0.750343	0.134781
23	A23	78	79.9501	0.743828	0.134136
23	A23	79	80.2072	0.735072	0.133766
23	A23	80	80.4642	0.726797	0.133753
23	A23	81	80.7213	0.71916	0.13405
23	A23	82	80.9784	0.712954	0.134485
23	A23	83	81.2355	0.702248	0.134829
23	A23	84	81.4926	0.695424	0.134892
23	A23	85	81.7497	0.686283	0.134611
23	A23	86	82.0068	0.677829	0.134067
23	A23	87	82.2639	0.670508	0.133439
23	A23	88	82.5209	0.663228	0.132897
23	A23	89	82.778	0.655747	0.132524
23	A23	90	83.0351	0.646765	0.132291
23	A23	91	83.2922	0.638725	0.132116
23	A23	92	83.5493	0.631919	0.131938
23	A23	93	83.8064	0.623159	0.131769
23	A23	94	84.0635	0.614815	0.131688
23	A23	95	84.3206	0.609026	0.131807
23	A23	96	84.5776	0.599358	0.132215
23	A23	97	84.8347	0.59285	0.132955
23	A23	98	85.0918	0.585186	0.134022
23	A23	99	85.3489	0.575042	0.135377
23	A23	100	85.606	0.569113	0.136958
23	A23	101	85.8631	0.561246	0.138699
23	A23	102	86.1202	0.551195	0.140572
23	A23	103	86.3773	0.54475	0.142667
23	A23	104	86.6343	0.533577	0.145263
23	A23	105	86.8914	0.524669	0.148806
23	A23	106	87.1485	0.514598	0.153801
23	A23	107	87.4056	0.504743	0.160677
23	A23	108	87.6627	0.494115	0.169774
23	A23	109	87.9198	0.484507	0.181521
23	A23	110	88.1769	0.472078	0.196717
23	A23	111	88.434	0.458749	0.216772
23	A23	112	88.691	0.445466	0.24367
23	A23	113	88.9481	0.433439	0.279518
23	A23	114	89.2052	0.415577	0.325618
23	A23	115	89.4623	0.394762	0.381228
23	A23	116	89.7194	0.367795	0.4424
23	A23	117	89.9765	0.336162	0.501559
23	A23	118	90.2336	0.288751	0.548496
23	A23	119	90.4907	0.234818	0.572953
23	A23	120	90.7477	0.181806	0.568072
23	A23	121	91.0048	0.146945	0.533232
23	A23	122	91.2619	0.128844	0.474724
23	A23	123	91.519	0.116716	0.403812
23	A23	124	91.7761	0.107366	0.333077
23	A23	125	92.0332	0.0983898	0.272793
23	A23	126	92.2903	0.0907152	0.228776
23	A23	127	92.5474	0.0831873	0.202069
23	A23	128	92.8045	0.0738611	0.189887
23	A23	129	93.0615	0.0644312	0.187011
23	A23	130	93.3186	0.0509286	0.187167
23	A23	131	93.5757	0.0336061	0.184359
23	A23	132	93.8328	0.0159523	0.174172
23	A23	133	94.0899	0.00409116	0.154845
23	A23	134	94.347	0.000125291	0.127644
23	A23	135	94.6041	-0.00119212	0.0962687
23	A23	136	94.8612	-0.00200728	0.0654313
24	A24	1	60.1543	1.36605	0.158657
24	A24	2	60.4114	1.36593	0.156863
24	A24	3	60.6685	1.35601	0.154768
24	A24	4	60.9256	1.35034	0.152726
24	A24	5	61.1827	1.34421	0.151157
24	A24	6	61.4397	1.33244	0.150502
24	A24	7	61.6968	1.32638	0.151138
24	A24	8	61.9539	1.31955	0.153235
24	A24	9	62.211	1.31299	0.156594
24	A24	10	62.4681	1.306	0.160627
24	A24	11	62.7252	1.2958	0.164532
24	A24	12	62.9823	1.28509	0.167629
24	A24	13	63.2394	1.2742	0.169651
24	A24	14	63.4964	1.27069	0.170798
24	A24	15	63.7535	1.25444	0.171542
24	A24	16	64.0106	1.2513	0.172288
24	A24	17	64.2677	1.24187	0.173121
24	A24	18	64.5248	1.23317	0.173786
24	A24	19	64.7819	1.22215	0.173912
24	A24	20	65.039	1.21218	0.173323
24	A24	21	65.2961	1.20141	0.172202
24	A24	22	65.5531	1.19473	0.171044
24	A24	23	65.8102	1.18635	0.17041
24	A24	24	66.0673	1.17984	0.170683
24	A24	25	66.3244	1.16467	0.171938
24	A24	26	66.5815	1.16175	0.173961
24	A24	27	66.8386	1.15292	0.176367
24	A24	28	67.0957	1.13944	0.178718
24	A24	29	67.3528	1.13103	0.180642
24	A24	30	67.6098	1.12441	0.181888
24	A24	31	67.8669	1.10995	0.182324
24	A24	32	68.124	1.10292	0.181915
24	A24	33	68.3811	1.09378	0.180719
24	A24	34	68.6382	1.08454	0.178922
24	A24	35	68.8953	1.07128	0.176855
24	A24	36	69.1524	1.06428	0.174936
24	A24	37	69.4095	1.05766	0.173519
24	A24	38	69.6665	1.04812	0.172739
24	A24	39	69.9236	1.0387	0.172463
24	A24	40	70.1807	1.02956	0.172376
24	A24	41	70.4378	1.02093	0.17216
24	A24	42	70.6949	1.00908	0.171602
24	A24	43	70.952	1.00287	0.170622
24	A24	44	71.2091	0.994805	0.169242
24	A24	45	71.4662	0.983126	0.167562
24	A24	46	71.7233	0.974239	0.165765
24	A24	47	71.9803	0.966967	0.164111
24	A24	48	72.2374	0.958604	0.162855
24	A24	49	72.4945	0.9498	0.162147
24	A24	50	72.7516	0.942836	0.161982
24	A24	51	73.0087	0.934351	0.162226
24	A24	52	73.2658	0.923205	0.162716
24	A24	53	73.5229	0.915372	0.163308
24	A24	54	73.78	0.909228	0.163884
24	A24	55	74.037	0.90041	0.164329
24	A24	56	74.2941	0.890417	0.164558
24	A24	57	74.5512	0.87957	0.164558
24	A24	58	74.8083	0.872981	0.164413
24	A24	59	75.0654	0.865927	0.164234
24	A24	60	75.3225	0.855885	0.16408
24	A24	61	75.5796	0.846982	0.163909
24	A24	62	75.8367	0.839391	0.163615
24	A24	63	76.0937	0.829064	0.163102
24	A24	64	76.3508	0.821389	0.162309
24	A24	65	76.6079	0.812835	0.161211
24	A24	66	76.865	0.806446	0.159822
24	A24	67	77.1221	0.794677	0.158226
24	A24	68	77.3792	0.786944	0.156602
24	A24	69	77.6363	0.778677	0.155172
24	A24	70	77.8934	0.77347	0.154087
24	A24	71	78.1504	0.764672	0.15333
24	A24	72	78.4075	0.755237	0.152727
24	A24	73	78.6646	0.747079	0.152084
24	A24	74	78.9217	0.739432	0.151334
24	A24	75	79.1788	0.730801	0.150576
24	A24	76	79.4359	0.723924	0.149998
24	A24	77	79.693	0.717399	0.149735
24	A24	78	79.9501	0.708194	0.149796
24	A24	79	80.2072	0.700722	0.150081
24	A24	80	80.4642	0.692905	0.150458
24	A24	81	80.7213	0.682545	0.150809
24	A24	82	80.9784	0.679047	0.151041
24	A24	83	81.2355	0.669757	0.151077
24	A24	84	81.4926	0.658823	0.15087
24	A24	85	81.7497	0.651894	0.150437
24	A24	86	82.0068	0.645176	0.14985
24	A24	87	82.2639	0.637313	0.149193
24	A24	88	82.5209	0.629541	0.148504
24	A24	89	82.778	0.619818	0.147775
24	A24	90	83.0351	0.613784	0.146999
24	A24	91	83.2922	0.606063	0.146217
24	A24	92	83.5493	0.597147	0.145533
24	A24	93	83.8064	0.590984	0.14508
24	A24	94	84.0635	0.58329	0.144961
24	A24	95	84.3206	0.575313	0.145202
24	A24	96	84.5776	0.567001	0.145747
24	A24	97	84.8347	0.562552	0.146477
24	A24	98	85.0918	0.552029	0.147287
24	A24	99	85.3489	0.542984	0.14815
24	A24	100	85.606	0.53712	0.149148
24	A24	101	85.8631	0.530268	0.150457
24	A24	102	86.1202	0.521896	0.152308
24	A24	103	86.3773	0.513056	0.154976
24	A24	104	86.6343	0.504789	0.158764
24	A24	105	86.8914	0.496593	0.163964
24	A24	106	87.1485	0.485575	0.170774
24	A24	107	87.4056	0.47452	0.179276
24	A24	108	87.6627	0.465454	0.189563
24	A24	109	87.9198	0.454013	0.202007
24	A24	110	88.1769	0.443534	0.217544
24	A24	111	88.434	0.429921	0.237757
24	A24	112	88.691	0.418095	0.264631
24	A24	113	88.9481	0.406388	0.299942
24	A24	114	89.2052	0.388669	0.344354
24	A24	115	89.4623	0.367332	0.396416
24	A24	116	89.7194	0.343098	0.451798
24	A24	117	89.9765	0.31482	0.503258
24	A24	118	90.2336	0.273669	0.541802
24	A24	119	90.4907	0.227747	0.559105
24	A24	120	90.7477	0.185947	0.550442
24	A24	121	91.0048	0.159419	0.516815
24	A24	122	91.2619	0.144196	0.465045
24	A24	123	91.519	0.13239	0.405656
24	A24	124	91.7761	0.12149	0.349547
24	A24	125	92.0332	0.110119	0.305049
24	A24	126	92.2903	0.100077	0.276399
24	A24	127	92.5474	0.0893495	0.263698
24	A24	128	92.8045	0.0782296	0.263655
24	A24	129	93.0615	0.064853	0.270523
24	A24	130	93.3186	0.0480009	0.277134
24	A24	131	93.5757	0.0237583	0.276297
24	A24	132	93.8328	-0.000230481	0.262608
24	A24	133	94.0899	-0.0153253	0.234166
24	A24	134	94.347	-0.0206877	0.193326
24	A24	135	94.6041	-0.022586	0.14594
24	A24	136	94.8612	-0.0237615	0.0992746
37	B13	1	60.1543	1.45614	0.0666159
37	B13	2	60.4114	1.45076	0.0669852
37	B13	3	60.6685	1.44122	0.0672888
37	B13	4	60.9256	1.43372	0.0674228
37	B13	5	61.1827	1.42438	0.0673579
37	B13	6	61.4397	1.41507	0.067156
37	B13	7	61.6968	1.40356	0.0669303
37	B13	8	61.9539	1.39962	0.0667813
37	B13	9	62.211	1.38981	0.0667446
37	B13	10	62.4681	1.38076	0.0667973
37	B13	11	62.7252	1.37183	0.0669034
37	B13	12	62.9823	1.35844	0.0670473
37	B13	13	63.2394	1.35443	0.0672207
37	B13	14	63.4964	1.346	0.0673743
37	B13	15	63.7535	1.33818	0.0674081
37	B13	16	64.0106	1.32345	0.0672218
37	B13	17	64.2677	1.31811	0.0668075
37	B13	18	64.5248	1.30531	0.0662902
37	B13	19	64.7819	1.30121	0.065883
37	B13	20	65.039	1.29072	0.065773
37	B13	21	65.2961	1.2826	0.0660117
37	B13	22	65.5531	1.27656	0.0664785
37	B13	23	65.8102	1.264	0.0669306
37	B13	24	66.0673	1.25633	0.0671104
37	B13	25	66.3244	1.24573	0.0668651
37	B13	26	66.5815	1.23929	0.06621
37	B13	27	66.8386	1.22448	0.0653207
37	B13	28	67.0957	1.21989	0.0644507
37	B13	29	67.3528	1.21308	0.0638177
37	B13	30	67.6098	1.20765	0.0635225
37	B13	31	67.8669	1.19114	0.0635342
37	B13	32	68.124	1.18828	0.0637296
37	B13	33	68.3811	1.1797	0.0639593
37	B13	34	68.6382	1.17133	0.0641041
37	B13	35	68.8953	1.16102	0.0641119
37	B13	36	69.1524	1.15066	0.0640102
37	B13	37	69.4095	1.14583	0.0638737
37	B13	38	69.6665	1.13633	0.0637763
37	B13	39	69.9236	1.12871	0.0637468
37	B13	40	70.1807	1.11973	0.0637612
37	B13	41	70.4378	1.1108	0.0637737
37	B13	42	70.6949	1.10091	0.0637492
37	B13	43	70.952	1.09536	0.0636698
37	B13	44	71.2091	1.08491	0.063519
37	B13	45	71.4662	1.0776	0.0632743
37	B13	46	71.7233	1.06852	0.062927
37	B13	47	71.9803	1.0599	0.0625192
37	B13	48	72.2374	1.05033	0.0621612
37	B13	49	72.4945	1.04374	0.0619959
37	B13	50	72.7516	1.03591	0.0621219
37	B13	51	73.0087	1.02852	0.0625172
37	B13	52	73.2658	1.02162	0.0630247
37	B13	53	73.5229	1.00936	0.0634083
37	B13	54	73.78	1.0038	0.0634583
37	B13	55	74.037	0.990988	0.0630776
37	B13	56	74.2941	0.985111	0.0623111
37	B13	57	74.5512	0.976761	0.0613106
37	B13	58	74.8083	0.968512	0.0602732
37	B13	59	75.0654	0.960292	0.0593768
37	B13	60	75.3225	0.95265	0.0587336
37	B13	61	75.5796	0.946616	0.0583644
37	B13	62	75.8367	0.937778	0.0581988
37	B13	63	76.0937	0.932027	0.0581135
37	B13	64	76.3508	0.921647	0.0579986
37	B13	65	76.6079	0.913955	0.0578202
37	B13	66	76.865	0.905908	0.0576365
37	B13	67	77.1221	0.899657	0.0575498
37	B13	68	77.3792	0.892981	0.0576298
37	B13	69	77.6363	0.885544	0.0578592
37	B13	70	77.8934	0.876336	0.058139
37	B13	71	78.1504	0.867668	0.0583439
37	B13	72	78.4075	0.862166	0.0583879
37	B13	73	78.6646	0.85164	0.0582607
37	B13	74	78.9217	0.845411	0.058021
37	B13	75	79.1788	0.836144	0.0577554
37	B13	76	79.4359	0.830548	0.0575305
37	B13	77	79.693	0.823839	0.0573687
37	B13	78	79.9501	0.814364	0.0572563
37	B13	79	80.2072	0.806165	0.0571729
37	B13	80	80.4642	0.798482	0.0571141
37	B13	81	80.7213	0.79358	0.0570902
37	B13	82	80.9784	0.785025	0.0571104
37	B13	83	81.2355	0.775604	0.0571793
37	B13	84	81.4926	0.770109	0.0573066
37	B13	85	81.7497	0.759127	0.0575227
37	B13	86	82.0068	0.754795	0.0578883
37	B13	87	82.2639	0.748074	0.0585243
37	B13	88	82.5209	0.737182	0.0597073
37	B13	89	82.778	0.729309	0.0620656
37	B13	90	83.0351	0.722741	0.0668737
37	B13	91	83.2922	0.714823	0.076378
37	B13	92	83.5493	0.707678	0.0939981
37	B13	93	83.8064	0.69765	0.124111
37	B13	94	84.0635	0.689016	0.171064
37	B13	95	84.3206	0.680328	0.237246
37	B13	96	84.5776	0.664841	0.320589
37	B13	97	84.8347	0.636846	0.412629
37	B13	98	85.0918	0.577057	0.498648
37	B13	99	85.3489	0.461759	0.560849
37	B13	100	85.606	0.291333	0.583988
37	B13	101	85.8631	0.140599	0.561107
37	B13	102	86.1202	0.0512769	0.496472
37	B13	103	86.3773	0.0231174	0.404057
37	B13	104	86.6343	0.0176261	0.302327
37	B13	105	86.8914	0.0157771	0.208024
37	B13	106	87.1485	0.0140401	0.131823
37	B13	107	87.4056	0.014224	0.0772362
37	B13	108	87.6627	0.013763	0.0422373
37	B13	109	87.9198	0.013398	0.0220328
37	B13	110	88.1769	0.0129258	0.0114811
37	B13	111	88.434	0.0120851	0.00646342
37	B13	112	88.691	0.0119415	0.00426012
37	B13	113	88.9481	0.0113485	0.0033386
37	B13	114	89.2052	0.011488	0.00295224
37	B13	115	89.4623	0.0109044	0.00278341
37	B13	116	89.7194	0.0106387	0.00270868
37	B13	117	89.9765	0.00995606	0.00267688
37	B13	118	90.2336	0.00993555	0.00266008
37	B13	119	90.4907	0.00954831	0.00263977
37	B13	120	90.7477	0.00906051	0.00260409
37	B13	121	91.0048	0.00856391	0.00254639
37	B13	122	91.2619	0.00875869	0.00246356
37	B13	123	91.519	0.00787095	0.00235543
37	B13	124	91.7761	0.0078603	0.00222561
37	B13	125	92.0332	0.00753637	0.00208291
37	B13	126	92.2903	0.00729289	0.00194205
37	B13	127	92.5474	0.00715342	0.00182174
37	B13	128	92.8045	0.00689151	0.0017398
37	B13	129	93.0615	0.00682028	0.00170583
37	B13	130	93.3186	0.00670803	0.0017142
37	B13	131	93.5757	0.00627275	0.00174061
37	B13	132	93.8328	0.00598245	0.00174524
37	B13	133	94.0899	0.00580202	0.00168368
37	B13	134	94.347	0.00555844	0.00152374
37	B13	135	94.6041	0.00473312	0.00126167
37	B13	136	94.8612	0.00482858	0.00092897
38	B14	1	60.1543	1.44822	0.0656129
38	B14	2	60.4114	1.4417	0.0658045
38	B14	3	60.6685	1.42824	0.0659207
38	B14	4	60.9256	1.42285	0.0659872
38	B14	5	61.1827	1.41837	0.0660834
38	B14	6	61.4397	1.40619	0.0662855
38	B14	7	61.6968	1.39538	0.0666031
38	B14	8	61.9539	1.39097	0.0669579
38	B14	9	62.211	1.38193	0.0672095
38	B14	10	62.4681	1.3701	0.0672256
38	B14	11	62.7252	1.36127	0.0669517
38	B14	12	62.9823	1.3515	0.0664437
38	B14	13	63.2394	1.34375	0.0658379
38	B14	14	63.4964	1.3342	0.0652762
38	B14	15	63.7535	1.33039	0.064846
38	B14	16	64.0106	1.3146	0.0645632
38	B14	17	64.2677	1.31305	0.064411
38	B14	18	64.5248	1.29834	0.0643818
38	B14	19	64.7819	1.29303	0.0644909
38	B14	20	65.039	1.28432	0.0647492
38	B14	21	65.2961	1.27708	0.0651286
38	B14	22	65.5531	1.266	0.0655503
38	B14	23	65.8102	1.25761	0.0659048
38	B14	24	66.0673	1.25094	0.0660996
38	B14	25	66.3244	1.23768	0.0660945
38	B14	26	66.5815	1.23301	0.0659153
38	B14	27	66.8386	1.22047	0.0656355
38	B14	28	67.0957	1.21477	0.065341
38	B14	29	67.3528	1.20527	0.065095
38	B14	30	67.6098	1.19711	0.064923
38	B14	31	67.8669	1.18852	0.0648173
38	B14	32	68.124	1.178	0.0647481
38	B14	33	68.3811	1.17088	0.0646752
38	B14	34	68.6382	1.16576	0.0645607
38	B14	35	68.8953	1.15151	0.0643852
38	B14	36	69.1524	1.14533	0.0641672
38	B14	37	69.4095	1.13626	0.0639575
38	B14	38	69.6665	1.12851	0.063811
38	B14	39	69.9236	1.12151	0.0637469
38	B14	40	70.1807	1.11166	0.0637367
38	B14	41	70.4378	1.10269	0.0637262
38	B14	42	70.6949	1.09482	0.063675
38	B14	43	70.952	1.08554	0.0635824
38	B14	44	71.2091	1.07785	0.0634794
38	B14	45	71.4662	1.06931	0.0633896
38	B14	46	71.7233	1.06007	0.0632963
38	B14	47	71.9803	1.05399	0.0631369
38	B14	48	72.2374	1.04413	0.0628431
38	B14	49	72.4945	1.0353	0.0623959
38	B14	50	72.7516	1.0247	0.0618569
38	B14	51	73.0087	1.01803	0.0613451
38	B14	52	73.2658	1.01402	0.0609722
38	B14	53	73.5229	1.0031	0.0607859
38	B14	54	73.78	0.99401	0.0607589
38	B14	55	74.037	0.987294	0.0608267
38	B14	56	74.2941	0.979216	0.0609362
38	B14	57	74.5512	0.971795	0.0610677
38	B14	58	74.8083	0.960491	0.0612216
38	B14	59	75.0654	0.955194	0.0613785
38	B14	60	75.3225	0.947102	0.0614714
38	B14	61	75.5796	0.939937	0.0613924
38	B14	62	75.8367	0.928448	0.0610496
38	B14	63	76.0937	0.919901	0.0604309
38	B14	64	76.3508	0.913841	0.0596361
38	B14	65	76.6079	0.903999	0.0588416
38	B14	66	76.865	0.89917	0.058222
38	B14	67	77.1221	0.890521	0.0578763
38	B14	68	77.3792	0.884342	0.0578003
38	B14	69	77.6363	0.874074	0.057911
38	B14	70	77.8934	0.86729	0.058094
38	B14	71	78.1504	0.861512	0.0582508
38	B14	72	78.4075	0.850628	0.058327
38	B14	73	78.6646	0.843831	0.058323
38	B14	74	78.9217	0.835873	0.0582783
38	B14	75	79.1788	0.827576	0.058236
38	B14	76	79.4359	0.821688	0.0582036
38	B14	77	79.693	0.815257	0.0581396
38	B14	78	79.9501	0.803335	0.0579856
38	B14	79	80.2072	0.79733	0.0577136
38	B14	80	80.4642	0.787299	0.0573596
38	B14	81	80.7213	0.785494	0.0570088
38	B14	82	80.9784	0.773514	0.0567501
38	B14	83	81.2355	0.766016	0.0566368
38	B14	84	81.4926	0.761149	0.0566755
38	B14	85	81.7497	0.7519	0.0568569
38	B14	86	82.0068	0.744608	0.0572176
38	B14	87	82.2639	0.7366	0.0579272
38	B14	88	82.5209	0.727891	0.0593866
38	B14	89	82.778	0.721067	0.0623569
38	B14	90	83.0351	0.715899	0.0681362
38	B14	91	83.2922	0.706321	0.0788091
38	B14	92	83.5493	0.699168	0.0974602
38	B14	93	83.8064	0.686938	0.128082
38	B14	94	84.0635	0.67837	0.174766
38	B14	95	84.3206	0.663892	0.23991
38	B14	96	84.5776	0.651852	0.321754
38	B14	97	84.8347	0.620402	0.412324
38	B14	98	85.0918	0.568039	0.497354
38	B14	99	85.3489	0.4524	0.559273
38	B14	100	85.606	0.281056	0.582749
38	B14	101	85.8631	0.12956	0.56052
38	B14	102	86.1202	0.0385442	0.496507
38	B14	103	86.3773	0.0104041	0.404464
38	B14	104	86.6343	0.00483887	0.302819
38	B14	105	86.8914	0.00349626	0.2084
38	B14	106	87.1485	0.00243381	0.132001
38	B14	107	87.4056	0.00151977	0.0772095
38	B14	108	87.6627	0.00154958	0.0420277
38	B14	109	87.9198	0.000633275	0.0216714
38	B14	110	88.1769	0.000838066	0.0110148
38	B14	111	88.434	0.000721176	0.00596059
38	B14	112	88.691	0.00010002	0.00379431
38	B14	113	88.9481	-0.000186285	0.00295791
38	B14	114	89.2052	-0.000652023	0.0026588
38	B14	115	89.4623	-0.00132385	0.00254057
38	B14	116	89.7194	-0.00120905	0.0024705
38	B14	117	89.9765	-0.00158705	0.00241762
38	B14	118	90.2336	-0.00156951	0.00238413
38	B14	119	90.4907	-0.0023328	0.00236966
38	B14	120	90.7477	-0.00259724	0.00235999
38	B14	121	91.0048	-0.00268369	0.00233305
38	B14	122	91.2619	-0.00337293	0.00227212
38	B14	123	91.519	-0.00357103	0.00217606
38	B14	124	91.7761	-0.00376428	0.00206042
38	B14	125	92.0332	-0.00389003	0.00194926
38	B14	126	92.2903	-0.00420793	0.00186214
38	B14	127	92.5474	-0.00406603	0.00180406
38	B14	128	92.8045	-0.00457822	0.00176431
38	B14	129	93.0615	-0.00537245	0.00172441
38	B14	130	93.3186	-0.00489457	0.00166856
38	B14	131	93.5757	-0.00511846	0.00158856
38	B14	132	93.8328	-0.0058019	0.00148075
38	B14	133	94.0899	-0.00546743	0.00134045
38	B14	134	94.347	-0.00579137	0.00116142
38	B14	135	94.6041	-0.00624924	0.00094266
38	B14	136	94.8612	-0.00643735	0.000696751
39	B15	1	60.1543	1.46854	0.0656437
39	B15	2	60.4114	1.46032	0.0660607
39	B15	3	60.6685	1.45362	0.0665081
39	B15	4	60.9256	1.44582	0.0669178
39	B15	5	61.1827	1.43409	0.0672538
39	B15	6	61.4397	1.4282	0.0674911
39	B15	7	61.6968	1.41747	0.0675871
39	B15	8	61.9539	1.4123	0.0674759
39	B15	9	62.211	1.39802	0.0671081
39	B15	10	62.4681	1.39259	0.066514
39	B15	11	62.7252	1.37951	0.0658297
39	B15	12	62.9823	1.37277	0.0652526
39	B15	13	63.2394	1.36694	0.0649491
39	B15	14	63.4964	1.35873	0.0649742
39	B15	15	63.7535	1.34798	0.065253
39	B15	16	64.0106	1.33948	0.065632
39	B15	17	64.2677	1.33189	0.0659499
39	B15	18	64.5248	1.32246	0.0660961
39	B15	19	64.7819	1.31358	0.066036
39	B15	20	65.039	1.30307	0.065811
39	B15	21	65.2961	1.29679	0.0655276
39	B15	22	65.5531	1.2868	0.0653325
39	B15	23	65.8102	1.27773	0.0653684
39	B15	24	66.0673	1.27065	0.0657191
39	B15	25	66.3244	1.26187	0.0663637
39	B15	26	66.5815	1.25491	0.0671682
39	B15	27	66.8386	1.24539	0.0679265
39	B15	28	67.0957	1.23239	0.0684327
39	B15	29	67.3528	1.22512	0.0685465
39	B15	30	67.6098	1.21883	0.0682227
39	B15	31	67.8669	1.20475	0.0675059
39	B15	32	68.124	1.19847	0.0665108
39	B15	33	68.3811	1.18857	0.0653995
39	B15	34	68.6382	1.18094	0.0643556
39	B15	35	68.8953	1.17325	0.0635508
39	B15	36	69.1524	1.16449	0.0631069
39	B15	37	69.4095	1.15545	0.0630607
39	B15	38	69.6665	1.15155	0.0633529
39	B15	39	69.9236	1.13994	0.0638378
39	B15	40	70.1807	1.13115	0.0643256
39	B15	41	70.4378	1.12428	0.0646366
39	B15	42	70.6949	1.11376	0.0646521
39	B15	43	70.952	1.10587	0.0643432
39	B15	44	71.2091	1.09531	0.0637738
39	B15	45	71.4662	1.08914	0.0630785
39	B15	46	71.7233	1.08029	0.0624191
39	B15	47	71.9803	1.07122	0.0619313
39	B15	48	72.2374	1.06488	0.0616702
39	B15	49	72.4945	1.05552	0.0615874
39	B15	50	72.7516	1.05094	0.0615567
39	B15	51	73.0087	1.0399	0.0614501
39	B15	52	73.2658	1.03053	0.0612249
39	B15	53	73.5229	1.01875	0.0609523
39	B15	54	73.78	1.01951	0.0607673
39	B15	55	74.037	1.00862	0.0607676
39	B15	56	74.2941	0.999352	0.0609432
39	B15	57	74.5512	0.992058	0.0611838
39	B15	58	74.8083	0.983901	0.0613494
39	B15	59	75.0654	0.975247	0.0613487
39	B15	60	75.3225	0.965521	0.061185
39	B15	61	75.5796	0.959496	0.0609438
[truncated: 27,411 more rows]
