# Supplementary material for: Transcriptomic identification of HBx-associated hub genes in hepatocellular carcinoma
Source: PeerJ. 2021 Dec 22;9:e12697. doi: 10.7717/peerj.12697 (PMC8710059; doi:10.7717/peerj.12697)
Supplement: Supplemental Information 10 [file peerj-09-12697-s010.xlsx]

## Sheet: Sample Setup
Block Type	384-Well Block
Calibration Background is expired	Yes
Calibration Background performed on	10-12-2018 11:47:46 PDT
Calibration FAM is expired	Yes
Calibration FAM performed on	10-23-2018 10:23:19 PDT
Calibration MELTDOCTOR is expired	Yes
Calibration MELTDOCTOR performed on	09-26-2017 21:22:46 PDT
Calibration NED is expired	Yes
Calibration NED performed on	10-23-2018 10:33:14 PDT
Calibration ROI is expired	Yes
Calibration ROI performed on	10-12-2018 09:37:21 PDT
Calibration ROX is expired	Yes
Calibration ROX performed on	10-23-2018 10:07:21 PDT
Calibration SYBR is expired	Yes
Calibration SYBR performed on	10-23-2018 09:57:53 PDT
Calibration TAMRA is expired	Yes
Calibration TAMRA performed on	10-23-2018 10:45:25 PDT
Calibration Uniformity is expired	Yes
Calibration Uniformity performed on	10-12-2018 10:06:59 PDT
Calibration VIC is expired	Yes
Calibration VIC performed on	10-23-2018 10:54:25 PDT
Chemistry	SYBR_GREEN
Date Created	10-14-2020 17:18:56 PDT
Experiment File Name	D:\NZZ\2020-10-14 154309.eds
Experiment Name	2020-10-14 154309
Experiment Run End Time	10-14-2020 10:13:03 PDT
Experiment Type	Comparative Cт (ΔΔCт)
Instrument Name	285880860
Instrument Serial Number	285880860
Instrument Type	QuantStudio 12K Flex
Passive Reference	ROX
Quantification Cycle Method	Ct
Signal Smoothing On	true
Stage/ Cycle where Analysis is performed	Stage 2, Step 2
Well	Well Position	Sample Name	Sample Color	Biogroup Name	Biogroup Color	Target Name	Target Color	Task	Reporter	Quencher	Quantity	Comments
1	A1
2	A2
3	A3
4	A4
5	A5
6	A6
7	A7
8	A8
9	A9
10	A10
11	A11
12	A12
13	A13
14	A14
15	A15
16	A16
17	A17
18	A18
19	A19
20	A20
21	A21
22	A22
23	A23
24	A24
25	B1
26	B2
27	B3
28	B4
29	B5
30	B6
31	B7
32	B8
33	B9
34	B10
35	B11
36	B12
37	B13
38	B14
39	B15
40	B16
41	B17
42	B18
43	B19
44	B20
45	B21
46	B22
47	B23
48	B24
49	C1
50	C2
51	C3
52	C4
53	C5
54	C6
55	C7
56	C8
57	C9
58	C10
59	C11
60	C12
61	C13
62	C14
63	C15
64	C16
65	C17
66	C18
67	C19
68	C20
69	C21
70	C22
71	C23
72	C24
73	D1
74	D2
75	D3
76	D4
77	D5
78	D6
79	D7
80	D8
81	D9
82	D10
83	D11
84	D12
85	D13
86	D14
87	D15
88	D16
89	D17
90	D18
91	D19
92	D20
93	D21
94	D22
95	D23
96	D24
97	E1
98	E2
99	E3
100	E4
101	E5
102	E6
103	E7
104	E8
105	E9
106	E10
107	E11
108	E12
109	E13
110	E14
111	E15
112	E16
113	E17
114	E18
115	E19
116	E20
117	E21
118	E22
119	E23
120	E24
121	F1
122	F2
123	F3
124	F4
125	F5
126	F6
127	F7
128	F8
129	F9
130	F10
131	F11
132	F12
133	F13
134	F14
135	F15
136	F16
137	F17
138	F18
139	F19
140	F20
141	F21
142	F22
143	F23
144	F24
145	G1
146	G2
147	G3
148	G4
149	G5
150	G6
151	G7
152	G8
153	G9
154	G10
155	G11
156	G12
157	G13
158	G14
159	G15
160	G16
161	G17
162	G18
163	G19
164	G20
165	G21
166	G22
167	G23
168	G24
169	H1
170	H2
171	H3
172	H4
173	H5
174	H6
175	H7
176	H8
177	H9
178	H10
179	H11
180	H12
181	H13
182	H14
183	H15
184	H16
185	H17
186	H18
187	H19
188	H20
189	H21
190	H22
191	H23
192	H24
193	I1
194	I2
195	I3
196	I4
197	I5
198	I6
199	I7
200	I8
201	I9
202	I10
203	I11
204	I12
205	I13
206	I14
207	I15
208	I16
209	I17
210	I18
211	I19
212	I20
213	I21
214	I22
215	I23
216	I24
217	J1
218	J2
219	J3
220	J4
221	J5
222	J6
223	J7
224	J8
225	J9
226	J10
227	J11
228	J12
229	J13
230	J14
231	J15
232	J16
233	J17
234	J18
235	J19
236	J20
237	J21
238	J22
239	J23
240	J24
241	K1
242	K2
243	K3
244	K4
245	K5
246	K6
247	K7
248	K8
249	K9
250	K10
251	K11
252	K12
253	K13
254	K14
255	K15
256	K16
257	K17
258	K18
259	K19
260	K20
261	K21
262	K22
263	K23
264	K24
265	L1
266	L2
267	L3
268	L4
269	L5
270	L6
271	L7
272	L8
273	L9
274	L10
275	L11
276	L12
277	L13
278	L14
279	L15
280	L16
281	L17
282	L18
283	L19
284	L20
285	L21
286	L22
287	L23
288	L24
289	M1	Vec	RGB(176,23,31)			GNAL	RGB(176,23,31)	UNKNOWN	SYBR	None
290	M2	Vec	RGB(176,23,31)			GNAL	RGB(176,23,31)	UNKNOWN	SYBR	None
291	M3	Vec	RGB(176,23,31)			GNAL	RGB(176,23,31)	UNKNOWN	SYBR	None
292	M4	HBx	RGB(0,0,255)			GNAL	RGB(176,23,31)	UNKNOWN	SYBR	None
293	M5	HBx	RGB(0,0,255)			GNAL	RGB(176,23,31)	UNKNOWN	SYBR	None
294	M6	HBx	RGB(0,0,255)			GNAL	RGB(176,23,31)	UNKNOWN	SYBR	None
295	M7	Vec	RGB(176,23,31)			RGS5	RGB(139,137,112)	UNKNOWN	SYBR	None
296	M8	Vec	RGB(176,23,31)			RGS5	RGB(139,137,112)	UNKNOWN	SYBR	None
297	M9	Vec	RGB(176,23,31)			RGS5	RGB(139,137,112)	UNKNOWN	SYBR	None
298	M10	HBx	RGB(0,0,255)			RGS5	RGB(139,137,112)	UNKNOWN	SYBR	None
299	M11	HBx	RGB(0,0,255)			RGS5	RGB(139,137,112)	UNKNOWN	SYBR	None
300	M12	HBx	RGB(0,0,255)			RGS5	RGB(139,137,112)	UNKNOWN	SYBR	None
301	M13
302	M14
303	M15
304	M16
305	M17
306	M18
307	M19
308	M20
309	M21
310	M22
311	M23
312	M24
313	N1	Vec	RGB(176,23,31)			ANGPTL6	RGB(0,0,255)	UNKNOWN	SYBR	None
314	N2	Vec	RGB(176,23,31)			ANGPTL6	RGB(0,0,255)	UNKNOWN	SYBR	None
315	N3	Vec	RGB(176,23,31)			ANGPTL6	RGB(0,0,255)	UNKNOWN	SYBR	None
316	N4	HBx	RGB(0,0,255)			ANGPTL6	RGB(0,0,255)	UNKNOWN	SYBR	None
317	N5	HBx	RGB(0,0,255)			ANGPTL6	RGB(0,0,255)	UNKNOWN	SYBR	None
318	N6	HBx	RGB(0,0,255)			ANGPTL6	RGB(0,0,255)	UNKNOWN	SYBR	None
319	N7
320	N8
321	N9
322	N10
323	N11
324	N12
325	N13
326	N14
327	N15
328	N16
329	N17
330	N18
331	N19
332	N20
333	N21
334	N22
335	N23
336	N24
337	O1	Vec	RGB(176,23,31)			CYC	RGB(0,139,69)	UNKNOWN	SYBR	None
338	O2	Vec	RGB(176,23,31)			CYC	RGB(0,139,69)	UNKNOWN	SYBR	None
339	O3	Vec	RGB(176,23,31)			CYC	RGB(0,139,69)	UNKNOWN	SYBR	None
340	O4	HBx	RGB(0,0,255)			CYC	RGB(0,139,69)	UNKNOWN	SYBR	None
341	O5	HBx	RGB(0,0,255)			CYC	RGB(0,139,69)	UNKNOWN	SYBR	None
342	O6	HBx	RGB(0,0,255)			CYC	RGB(0,139,69)	UNKNOWN	SYBR	None
343	O7
344	O8
345	O9
346	O10
347	O11
348	O12
349	O13
350	O14
351	O15
352	O16
353	O17
354	O18
355	O19
356	O20
357	O21
358	O22
359	O23
360	O24
361	P1	Vec	RGB(176,23,31)			ARG1	RGB(238,238,0)	UNKNOWN	SYBR	None
362	P2	Vec	RGB(176,23,31)			ARG1	RGB(238,238,0)	UNKNOWN	SYBR	None
363	P3	Vec	RGB(176,23,31)			ARG1	RGB(238,238,0)	UNKNOWN	SYBR	None
364	P4	HBx	RGB(0,0,255)			ARG1	RGB(238,238,0)	UNKNOWN	SYBR	None
365	P5	HBx	RGB(0,0,255)			ARG1	RGB(238,238,0)	UNKNOWN	SYBR	None
366	P6	HBx	RGB(0,0,255)			ARG1	RGB(238,238,0)	UNKNOWN	SYBR	None
367	P7
368	P8
369	P9
370	P10
371	P11
372	P12
373	P13
374	P14
375	P15
376	P16
377	P17
378	P18
379	P19
380	P20
381	P21
382	P22
383	P23
384	P24

## Sheet: Amplification Data
Block Type	384-Well Block
Calibration Background is expired	Yes
Calibration Background performed on	10-12-2018 11:47:46 PDT
Calibration FAM is expired	Yes
Calibration FAM performed on	10-23-2018 10:23:19 PDT
Calibration MELTDOCTOR is expired	Yes
Calibration MELTDOCTOR performed on	09-26-2017 21:22:46 PDT
Calibration NED is expired	Yes
Calibration NED performed on	10-23-2018 10:33:14 PDT
Calibration ROI is expired	Yes
Calibration ROI performed on	10-12-2018 09:37:21 PDT
Calibration ROX is expired	Yes
Calibration ROX performed on	10-23-2018 10:07:21 PDT
Calibration SYBR is expired	Yes
Calibration SYBR performed on	10-23-2018 09:57:53 PDT
Calibration TAMRA is expired	Yes
Calibration TAMRA performed on	10-23-2018 10:45:25 PDT
Calibration Uniformity is expired	Yes
Calibration Uniformity performed on	10-12-2018 10:06:59 PDT
Calibration VIC is expired	Yes
Calibration VIC performed on	10-23-2018 10:54:25 PDT
Chemistry	SYBR_GREEN
Date Created	10-14-2020 17:18:57 PDT
Experiment File Name	D:\NZZ\2020-10-14 154309.eds
Experiment Name	2020-10-14 154309
Experiment Run End Time	10-14-2020 10:13:03 PDT
Experiment Type	Comparative Cт (ΔΔCт)
Instrument Name	285880860
Instrument Serial Number	285880860
Instrument Type	QuantStudio 12K Flex
Passive Reference	ROX
Quantification Cycle Method	Ct
Signal Smoothing On	true
Stage/ Cycle where Analysis is performed	Stage 2, Step 2
Well	Cycle	Target Name	Rn	Delta Rn
1	1
1	2
1	3
1	4
1	5
1	6
1	7
1	8
1	9
1	10
1	11
1	12
1	13
1	14
1	15
1	16
1	17
1	18
1	19
1	20
1	21
1	22
1	23
1	24
1	25
1	26
1	27
1	28
1	29
1	30
1	31
1	32
1	33
1	34
1	35
1	36
1	37
1	38
1	39
1	40
2	1
2	2
2	3
2	4
2	5
2	6
2	7
2	8
2	9
2	10
2	11
2	12
2	13
2	14
2	15
2	16
2	17
2	18
2	19
2	20
2	21
2	22
2	23
2	24
2	25
2	26
2	27
2	28
2	29
2	30
2	31
2	32
2	33
2	34
2	35
2	36
2	37
2	38
2	39
2	40
3	1
3	2
3	3
3	4
3	5
3	6
3	7
3	8
3	9
3	10
3	11
3	12
3	13
3	14
3	15
3	16
3	17
3	18
3	19
3	20
3	21
3	22
3	23
3	24
3	25
3	26
3	27
3	28
3	29
3	30
3	31
3	32
3	33
3	34
3	35
3	36
3	37
3	38
3	39
3	40
4	1
4	2
4	3
4	4
4	5
4	6
4	7
4	8
4	9
4	10
4	11
4	12
4	13
4	14
4	15
4	16
4	17
4	18
4	19
4	20
4	21
4	22
4	23
4	24
4	25
4	26
4	27
4	28
4	29
4	30
4	31
4	32
4	33
4	34
4	35
4	36
4	37
4	38
4	39
4	40
5	1
5	2
5	3
5	4
5	5
5	6
5	7
5	8
5	9
5	10
5	11
5	12
5	13
5	14
5	15
5	16
5	17
5	18
5	19
5	20
5	21
5	22
5	23
5	24
5	25
5	26
5	27
5	28
5	29
5	30
5	31
5	32
5	33
5	34
5	35
5	36
5	37
5	38
5	39
5	40
6	1
6	2
6	3
6	4
6	5
6	6
6	7
6	8
6	9
6	10
6	11
6	12
6	13
6	14
6	15
6	16
6	17
6	18
6	19
6	20
6	21
6	22
6	23
6	24
6	25
6	26
6	27
6	28
6	29
6	30
6	31
6	32
6	33
6	34
6	35
6	36
6	37
6	38
6	39
6	40
7	1
7	2
7	3
7	4
7	5
7	6
7	7
7	8
7	9
7	10
7	11
7	12
7	13
7	14
7	15
7	16
7	17
7	18
7	19
7	20
7	21
7	22
7	23
7	24
7	25
7	26
7	27
7	28
7	29
7	30
7	31
7	32
7	33
7	34
7	35
7	36
7	37
7	38
7	39
7	40
8	1
8	2
8	3
8	4
8	5
8	6
8	7
8	8
8	9
8	10
8	11
8	12
8	13
8	14
8	15
8	16
8	17
8	18
8	19
8	20
8	21
8	22
8	23
8	24
8	25
8	26
8	27
8	28
8	29
8	30
8	31
8	32
8	33
8	34
8	35
8	36
8	37
8	38
8	39
8	40
9	1
9	2
9	3
9	4
9	5
9	6
9	7
9	8
9	9
9	10
9	11
9	12
9	13
9	14
9	15
9	16
9	17
9	18
9	19
9	20
9	21
9	22
9	23
9	24
9	25
9	26
9	27
9	28
9	29
9	30
9	31
9	32
9	33
9	34
9	35
9	36
9	37
9	38
9	39
9	40
10	1
10	2
10	3
10	4
10	5
10	6
10	7
10	8
10	9
10	10
10	11
10	12
10	13
10	14
10	15
10	16
10	17
10	18
10	19
10	20
10	21
10	22
10	23
10	24
10	25
10	26
10	27
10	28
10	29
10	30
10	31
10	32
10	33
10	34
10	35
10	36
10	37
10	38
10	39
10	40
11	1
11	2
11	3
11	4
11	5
11	6
11	7
11	8
11	9
11	10
11	11
11	12
11	13
11	14
11	15
11	16
11	17
11	18
11	19
11	20
11	21
11	22
11	23
11	24
11	25
11	26
11	27
11	28
11	29
11	30
11	31
11	32
11	33
11	34
11	35
11	36
11	37
11	38
11	39
11	40
12	1
12	2
12	3
12	4
12	5
12	6
12	7
12	8
12	9
12	10
12	11
12	12
12	13
12	14
12	15
12	16
12	17
12	18
12	19
12	20
12	21
12	22
12	23
12	24
12	25
12	26
12	27
12	28
12	29
12	30
12	31
12	32
12	33
12	34
12	35
12	36
12	37
12	38
12	39
12	40
13	1
13	2
13	3
13	4
13	5
13	6
13	7
13	8
13	9
13	10
13	11
13	12
13	13
13	14
13	15
13	16
13	17
13	18
13	19
13	20
13	21
13	22
13	23
13	24
13	25
13	26
13	27
13	28
13	29
13	30
13	31
13	32
13	33
13	34
13	35
13	36
13	37
13	38
13	39
13	40
14	1
14	2
14	3
14	4
14	5
14	6
14	7
14	8
14	9
14	10
14	11
14	12
14	13
14	14
14	15
14	16
14	17
14	18
14	19
14	20
14	21
14	22
14	23
14	24
14	25
14	26
14	27
14	28
14	29
14	30
14	31
14	32
14	33
14	34
14	35
14	36
14	37
14	38
14	39
14	40
15	1
15	2
15	3
15	4
15	5
15	6
15	7
15	8
15	9
15	10
15	11
15	12
15	13
15	14
15	15
15	16
15	17
15	18
15	19
15	20
15	21
15	22
15	23
15	24
15	25
15	26
15	27
15	28
15	29
15	30
15	31
15	32
15	33
15	34
15	35
15	36
15	37
15	38
15	39
15	40
16	1
16	2
16	3
16	4
16	5
16	6
16	7
16	8
16	9
16	10
16	11
16	12
16	13
16	14
16	15
16	16
16	17
16	18
16	19
16	20
16	21
16	22
16	23
16	24
16	25
16	26
16	27
16	28
16	29
16	30
16	31
16	32
16	33
16	34
16	35
16	36
16	37
16	38
16	39
16	40
17	1
17	2
17	3
17	4
17	5
17	6
17	7
17	8
17	9
17	10
17	11
17	12
17	13
17	14
17	15
17	16
17	17
17	18
17	19
17	20
17	21
17	22
17	23
17	24
17	25
17	26
17	27
17	28
17	29
17	30
17	31
17	32
17	33
17	34
17	35
17	36
17	37
17	38
17	39
17	40
18	1
18	2
18	3
18	4
18	5
18	6
18	7
18	8
18	9
18	10
18	11
18	12
18	13
18	14
18	15
18	16
18	17
18	18
18	19
18	20
18	21
18	22
18	23
18	24
18	25
18	26
18	27
18	28
18	29
18	30
18	31
18	32
18	33
18	34
18	35
18	36
18	37
18	38
18	39
18	40
19	1
19	2
19	3
19	4
19	5
19	6
19	7
19	8
19	9
19	10
19	11
19	12
19	13
19	14
19	15
19	16
19	17
19	18
19	19
19	20
19	21
19	22
19	23
19	24
19	25
19	26
19	27
19	28
19	29
19	30
19	31
19	32
19	33
19	34
19	35
19	36
19	37
19	38
19	39
19	40
20	1
20	2
20	3
20	4
20	5
20	6
20	7
20	8
20	9
20	10
20	11
20	12
20	13
20	14
20	15
20	16
20	17
20	18
20	19
20	20
20	21
20	22
20	23
20	24
20	25
20	26
20	27
20	28
20	29
20	30
20	31
20	32
20	33
20	34
20	35
20	36
20	37
20	38
20	39
20	40
21	1
21	2
21	3
21	4
21	5
21	6
21	7
21	8
21	9
21	10
21	11
21	12
21	13
21	14
21	15
21	16
21	17
21	18
21	19
21	20
21	21
21	22
21	23
21	24
21	25
21	26
21	27
21	28
21	29
21	30
21	31
21	32
21	33
21	34
21	35
21	36
21	37
21	38
21	39
21	40
22	1
22	2
22	3
22	4
22	5
22	6
22	7
22	8
22	9
22	10
22	11
22	12
22	13
22	14
22	15
22	16
22	17
22	18
22	19
22	20
22	21
22	22
22	23
22	24
22	25
22	26
22	27
22	28
22	29
22	30
22	31
22	32
22	33
22	34
22	35
22	36
22	37
22	38
22	39
22	40
23	1
23	2
23	3
23	4
23	5
23	6
23	7
23	8
23	9
23	10
23	11
23	12
23	13
23	14
23	15
23	16
23	17
23	18
23	19
23	20
23	21
23	22
23	23
23	24
23	25
23	26
23	27
23	28
23	29
23	30
23	31
23	32
23	33
23	34
23	35
23	36
23	37
23	38
23	39
23	40
24	1
24	2
24	3
24	4
24	5
24	6
24	7
24	8
24	9
24	10
24	11
24	12
24	13
24	14
24	15
24	16
24	17
24	18
24	19
24	20
24	21
24	22
24	23
24	24
24	25
24	26
24	27
24	28
24	29
24	30
24	31
24	32
24	33
24	34
24	35
24	36
24	37
24	38
24	39
24	40
25	1
25	2
25	3
25	4
25	5
25	6
25	7
25	8
25	9
25	10
25	11
25	12
25	13
25	14
25	15
25	16
25	17
25	18
25	19
25	20
25	21
25	22
25	23
25	24
25	25
25	26
25	27
25	28
25	29
25	30
25	31
25	32
25	33
25	34
25	35
25	36
25	37
25	38
25	39
25	40
26	1
26	2
26	3
26	4
26	5
26	6
26	7
26	8
26	9
26	10
26	11
26	12
26	13
26	14
26	15
26	16
26	17
26	18
26	19
26	20
26	21
26	22
26	23
26	24
26	25
26	26
26	27
26	28
26	29
26	30
26	31
26	32
26	33
26	34
26	35
26	36
26	37
26	38
26	39
26	40
27	1
27	2
27	3
27	4
27	5
27	6
27	7
27	8
27	9
27	10
27	11
27	12
27	13
27	14
27	15
27	16
27	17
27	18
27	19
27	20
27	21
27	22
27	23
27	24
27	25
27	26
27	27
27	28
27	29
27	30
27	31
27	32
27	33
27	34
27	35
27	36
27	37
27	38
27	39
27	40
28	1
28	2
28	3
28	4
28	5
28	6
28	7
28	8
28	9
28	10
28	11
28	12
28	13
28	14
28	15
28	16
28	17
28	18
28	19
28	20
28	21
28	22
28	23
28	24
28	25
28	26
28	27
28	28
28	29
28	30
28	31
28	32
28	33
28	34
28	35
28	36
28	37
28	38
28	39
28	40
29	1
29	2
29	3
29	4
29	5
29	6
29	7
29	8
29	9
29	10
29	11
29	12
29	13
29	14
29	15
29	16
29	17
29	18
29	19
29	20
29	21
29	22
29	23
29	24
29	25
29	26
29	27
29	28
29	29
29	30
29	31
29	32
29	33
29	34
29	35
29	36
29	37
29	38
29	39
29	40
30	1
30	2
30	3
30	4
30	5
30	6
30	7
30	8
30	9
30	10
30	11
30	12
30	13
30	14
30	15
30	16
30	17
30	18
30	19
30	20
30	21
30	22
30	23
30	24
30	25
30	26
30	27
30	28
30	29
30	30
30	31
30	32
30	33
30	34
30	35
30	36
30	37
30	38
30	39
30	40
31	1
31	2
31	3
31	4
31	5
31	6
31	7
31	8
31	9
31	10
31	11
31	12
31	13
31	14
31	15
31	16
31	17
31	18
31	19
31	20
31	21
31	22
31	23
31	24
31	25
31	26
31	27
31	28
31	29
31	30
31	31
31	32
31	33
31	34
31	35
31	36
31	37
31	38
31	39
31	40
32	1
32	2
32	3
32	4
32	5
32	6
32	7
32	8
32	9
32	10
32	11
32	12
32	13
32	14
32	15
32	16
32	17
32	18
32	19
32	20
32	21
32	22
32	23
32	24
32	25
32	26
32	27
32	28
32	29
32	30
32	31
32	32
32	33
32	34
32	35
32	36
32	37
32	38
32	39
32	40
33	1
33	2
33	3
33	4
33	5
33	6
33	7
33	8
33	9
33	10
33	11
33	12
33	13
33	14
33	15
33	16
33	17
33	18
33	19
33	20
33	21
33	22
33	23
33	24
33	25
33	26
33	27
33	28
33	29
33	30
33	31
33	32
33	33
33	34
33	35
33	36
33	37
33	38
33	39
33	40
34	1
34	2
34	3
34	4
34	5
34	6
34	7
34	8
34	9
34	10
34	11
34	12
34	13
34	14
34	15
34	16
34	17
34	18
34	19
34	20
34	21
34	22
34	23
34	24
34	25
34	26
34	27
34	28
34	29
34	30
34	31
34	32
34	33
34	34
34	35
34	36
34	37
34	38
34	39
34	40
35	1
35	2
35	3
35	4
35	5
35	6
35	7
35	8
35	9
35	10
35	11
35	12
35	13
35	14
35	15
35	16
35	17
35	18
35	19
35	20
35	21
35	22
35	23
35	24
35	25
35	26
35	27
35	28
35	29
35	30
35	31
35	32
35	33
35	34
35	35
35	36
35	37
35	38
35	39
35	40
36	1
36	2
36	3
36	4
36	5
36	6
36	7
36	8
36	9
36	10
36	11
36	12
36	13
36	14
36	15
36	16
36	17
36	18
36	19
36	20
36	21
36	22
36	23
36	24
36	25
36	26
36	27
36	28
36	29
36	30
36	31
36	32
36	33
36	34
36	35
36	36
36	37
36	38
36	39
36	40
37	1
37	2
37	3
37	4
37	5
37	6
37	7
37	8
37	9
37	10
37	11
37	12
37	13
37	14
37	15
37	16
37	17
37	18
37	19
37	20
37	21
37	22
37	23
37	24
37	25
37	26
37	27
37	28
37	29
37	30
37	31
37	32
37	33
37	34
37	35
37	36
37	37
37	38
37	39
37	40
38	1
38	2
38	3
38	4
38	5
38	6
38	7
38	8
38	9
38	10
38	11
38	12
38	13
38	14
38	15
38	16
38	17
38	18
38	19
38	20
38	21
38	22
38	23
38	24
38	25
38	26
38	27
38	28
38	29
38	30
38	31
38	32
38	33
38	34
38	35
38	36
38	37
38	38
38	39
38	40
39	1
39	2
39	3
39	4
39	5
39	6
39	7
39	8
39	9
39	10
39	11
39	12
39	13
39	14
39	15
39	16
39	17
39	18
39	19
39	20
39	21
39	22
39	23
39	24
39	25
39	26
39	27
39	28
39	29
39	30
39	31
39	32
39	33
39	34
39	35
39	36
39	37
39	38
39	39
39	40
40	1
40	2
40	3
40	4
40	5
40	6
40	7
40	8
40	9
40	10
40	11
40	12
40	13
40	14
40	15
40	16
40	17
40	18
40	19
40	20
40	21
40	22
40	23
40	24
40	25
40	26
40	27
40	28
40	29
40	30
40	31
40	32
40	33
40	34
40	35
40	36
40	37
40	38
40	39
40	40
41	1
41	2
41	3
41	4
41	5
41	6
41	7
41	8
41	9
41	10
41	11
41	12
41	13
41	14
41	15
41	16
41	17
41	18
41	19
41	20
41	21
41	22
41	23
41	24
41	25
41	26
41	27
41	28
41	29
41	30
41	31
41	32
41	33
41	34
41	35
41	36
41	37
41	38
41	39
41	40
42	1
42	2
42	3
42	4
42	5
42	6
42	7
42	8
42	9
42	10
42	11
42	12
42	13
42	14
42	15
42	16
42	17
42	18
42	19
42	20
42	21
42	22
42	23
42	24
42	25
42	26
42	27
42	28
42	29
42	30
42	31
42	32
42	33
42	34
42	35
42	36
42	37
42	38
42	39
42	40
43	1
43	2
43	3
43	4
43	5
43	6
43	7
43	8
43	9
43	10
43	11
43	12
43	13
43	14
43	15
43	16
43	17
43	18
43	19
43	20
43	21
43	22
43	23
43	24
43	25
43	26
43	27
43	28
43	29
43	30
43	31
43	32
43	33
43	34
43	35
43	36
43	37
43	38
43	39
43	40
44	1
44	2
44	3
44	4
44	5
44	6
44	7
44	8
44	9
44	10
44	11
44	12
44	13
44	14
44	15
44	16
44	17
44	18
44	19
44	20
44	21
44	22
44	23
44	24
44	25
44	26
44	27
44	28
44	29
44	30
44	31
44	32
44	33
44	34
44	35
44	36
44	37
44	38
44	39
44	40
45	1
45	2
45	3
45	4
45	5
45	6
45	7
45	8
45	9
45	10
45	11
45	12
45	13
45	14
45	15
45	16
45	17
45	18
45	19
45	20
45	21
45	22
45	23
45	24
45	25
45	26
45	27
45	28
45	29
45	30
45	31
45	32
45	33
45	34
45	35
45	36
45	37
45	38
45	39
45	40
46	1
46	2
46	3
46	4
46	5
46	6
46	7
46	8
46	9
46	10
46	11
46	12
46	13
46	14
46	15
46	16
46	17
46	18
46	19
46	20
46	21
46	22
46	23
46	24
46	25
46	26
46	27
46	28
46	29
46	30
46	31
46	32
46	33
46	34
46	35
46	36
46	37
46	38
46	39
46	40
47	1
47	2
47	3
47	4
47	5
47	6
47	7
47	8
47	9
47	10
47	11
47	12
47	13
47	14
47	15
47	16
47	17
47	18
47	19
47	20
47	21
47	22
47	23
47	24
47	25
47	26
47	27
47	28
47	29
47	30
47	31
47	32
47	33
47	34
47	35
47	36
47	37
47	38
47	39
47	40
48	1
48	2
48	3
48	4
48	5
48	6
48	7
48	8
48	9
48	10
48	11
48	12
48	13
48	14
48	15
48	16
48	17
48	18
48	19
48	20
48	21
48	22
48	23
48	24
48	25
48	26
48	27
48	28
48	29
48	30
48	31
48	32
48	33
48	34
48	35
48	36
48	37
48	38
48	39
48	40
49	1
49	2
49	3
49	4
49	5
49	6
49	7
49	8
49	9
49	10
49	11
49	12
49	13
49	14
49	15
49	16
49	17
49	18
49	19
49	20
49	21
49	22
49	23
49	24
49	25
49	26
49	27
49	28
49	29
49	30
49	31
49	32
49	33
49	34
49	35
49	36
49	37
49	38
49	39
49	40
50	1
50	2
50	3
50	4
50	5
[truncated: 13,395 more rows]

## Sheet: Results
Block Type	384-Well Block
Calibration Background is expired	Yes
Calibration Background performed on	10-12-2018 11:47:46 PDT
Calibration FAM is expired	Yes
Calibration FAM performed on	10-23-2018 10:23:19 PDT
Calibration MELTDOCTOR is expired	Yes
Calibration MELTDOCTOR performed on	09-26-2017 21:22:46 PDT
Calibration NED is expired	Yes
Calibration NED performed on	10-23-2018 10:33:14 PDT
Calibration ROI is expired	Yes
Calibration ROI performed on	10-12-2018 09:37:21 PDT
Calibration ROX is expired	Yes
Calibration ROX performed on	10-23-2018 10:07:21 PDT
Calibration SYBR is expired	Yes
Calibration SYBR performed on	10-23-2018 09:57:53 PDT
Calibration TAMRA is expired	Yes
Calibration TAMRA performed on	10-23-2018 10:45:25 PDT
Calibration Uniformity is expired	Yes
Calibration Uniformity performed on	10-12-2018 10:06:59 PDT
Calibration VIC is expired	Yes
Calibration VIC performed on	10-23-2018 10:54:25 PDT
Chemistry	SYBR_GREEN
Date Created	10-14-2020 17:18:57 PDT
Experiment File Name	D:\NZZ\2020-10-14 154309.eds
Experiment Name	2020-10-14 154309
Experiment Run End Time	10-14-2020 10:13:03 PDT
Experiment Type	Comparative Cт (ΔΔCт)
Instrument Name	285880860
Instrument Serial Number	285880860
Instrument Type	QuantStudio 12K Flex
Passive Reference	ROX
Quantification Cycle Method	Ct
Signal Smoothing On	true
Stage/ Cycle where Analysis is performed	Stage 2, Step 2
Well	Well Position	Omit	Sample Name	Target Name	Task	Reporter	Quencher	RQ	RQ Min	RQ Max	CT	Ct Mean	Ct SE	Quantity	Delta Ct Mean	Delta Ct SE	Delta Delta Ct	Automatic Ct Threshold	Ct Threshold	Automatic Baseline	Baseline Start	Baseline End	Efficiency	Comments	Amp Score	Cq Conf	Tm1	Tm2	Tm3	HIGHSD
289	M1	false	Vec	GNAL	UNKNOWN	SYBR	None	1	0.836529	1.19542	32.273	32.452	0.0918446		15.223	0.0927488	0	true	0.0879019	true	3	28			1.31807	0.982865	78.7999			N
290	M2	false	Vec	GNAL	UNKNOWN	SYBR	None	1	0.836529	1.19542	32.508	32.452	0.0918446		15.223	0.0927488	0	true	0.0879019	true	3	28			1.31	0.973673	78.7999			N
291	M3	false	Vec	GNAL	UNKNOWN	SYBR	None	1	0.836529	1.19542	32.576	32.452	0.0918446		15.223	0.0927488	0	true	0.0879019	true	3	29			1.30356	0.978967	78.7999			N
292	M4	false	HBx	GNAL	UNKNOWN	SYBR	None	0.58494	0.169841	2.01456	31.944	33.225	0.64254		15.9966	0.642585	0.773638	true	0.0879019	true	3	28			1.30714	0.982878	78.7999			Y
293	M5	false	HBx	GNAL	UNKNOWN	SYBR	None	0.58494	0.169841	2.01456	33.95	33.225	0.64254		15.9966	0.642585	0.773638	true	0.0879019	true	3	30			1.31777	0.979837	78.5427			Y
294	M6	false	HBx	GNAL	UNKNOWN	SYBR	None	0.58494	0.169841	2.01456	33.781	33.225	0.64254		15.9966	0.642585	0.773638	true	0.0879019	true	3	29			1.3172	0.982359	78.6713			Y
295	M7	false	Vec	RGS5	UNKNOWN	SYBR	None	1	0.908105	1.10119	29.672	29.7404	0.0483939		12.5114	0.0500887	0	true	0.186546	true	3	24			1.32539	0.974088	79.7			N
296	M8	false	Vec	RGS5	UNKNOWN	SYBR	None	1	0.908105	1.10119	29.834	29.7404	0.0483939		12.5114	0.0500887	0	true	0.186546	true	3	24			1.33162	0.979408	79.7			N
297	M9	false	Vec	RGS5	UNKNOWN	SYBR	None	1	0.908105	1.10119	29.715	29.7404	0.0483939		12.5114	0.0500887	0	true	0.186546	true	3	24			1.32484	0.989303	79.7			N
298	M10	false	HBx	RGS5	UNKNOWN	SYBR	None	0.822096	0.69409	0.973709	30.151	30.0224	0.0876239		12.794	0.0879484	0.282621	true	0.186546	true	3	25			1.33536	0.977729	79.7			N
299	M11	false	HBx	RGS5	UNKNOWN	SYBR	None	0.822096	0.69409	0.973709	29.855	30.0224	0.0876239		12.794	0.0879484	0.282621	true	0.186546	true	3	24			1.32575	0.983925	79.7			N
300	M12	false	HBx	RGS5	UNKNOWN	SYBR	None	0.822096	0.69409	0.973709	30.061	30.0224	0.0876239		12.794	0.0879484	0.282621	true	0.186546	true	3	25			1.33742	0.976008	79.7			N
313	N1	false	Vec	ANGPTL6	UNKNOWN	SYBR	None	1	0.963613	1.03776	30.491	30.4874	0.0142841		13.2583	0.0192599	0	true	0.166594	true	3	25			1.30245	0.975083	90.1163			N
314	N2	false	Vec	ANGPTL6	UNKNOWN	SYBR	None	1	0.963613	1.03776	30.51	30.4874	0.0142841		13.2583	0.0192599	0	true	0.166594	true	3	25			1.30323	0.965284	90.1163			N
315	N3	false	Vec	ANGPTL6	UNKNOWN	SYBR	None	1	0.963613	1.03776	30.461	30.4874	0.0142841		13.2583	0.0192599	0	true	0.166594	true	3	25			1.30805	0.969532	90.1163			N
316	N4	false	HBx	ANGPTL6	UNKNOWN	SYBR	None	0.803654	0.619542	1.04248	30.584	30.8021	0.134988		13.5737	0.135199	0.315353	true	0.166594	true	3	25			1.31051	0.965603	90.1163			N
317	N5	false	HBx	ANGPTL6	UNKNOWN	SYBR	None	0.803654	0.619542	1.04248	31.049	30.8021	0.134988		13.5737	0.135199	0.315353	true	0.166594	true	3	26			1.31578	0.982654	90.1163			N
318	N6	false	HBx	ANGPTL6	UNKNOWN	SYBR	None	0.803654	0.619542	1.04248	30.773	30.8021	0.134988		13.5737	0.135199	0.315353	true	0.166594	true	3	26			1.31522	0.980337	90.1163			N
337	O1	false	Vec	CYC	UNKNOWN	SYBR	None				17.22	17.229	0.0129193					true	0.153469	true	3	12			1.30091	0.971762	83.5579			N
338	O2	false	Vec	CYC	UNKNOWN	SYBR	None				17.255	17.229	0.0129193					true	0.153469	true	3	12			1.30171	0.971184	83.5579			N
339	O3	false	Vec	CYC	UNKNOWN	SYBR	None				17.213	17.229	0.0129193					true	0.153469	true	3	12			1.30276	0.968132	83.5579			N
340	O4	false	HBx	CYC	UNKNOWN	SYBR	None				17.242	17.2284	0.00754836					true	0.153469	true	3	12			1.30079	0.967926	83.5579			N
341	O5	false	HBx	CYC	UNKNOWN	SYBR	None				17.215	17.2284	0.00754836					true	0.153469	true	3	12			1.30311	0.964442	83.5579			N
342	O6	false	HBx	CYC	UNKNOWN	SYBR	None				17.228	17.2284	0.00754836					true	0.153469	true	3	12			1.30564	0.969724	83.5579			N
361	P1	false	Vec	ARG1	UNKNOWN	SYBR	None	1	0.768731	1.30085	31.283	31.4348	0.136056		14.2057	0.136668	0	true	0.174711	true	3	26			1.33323	0.978158	80.8574			N
362	P2	false	Vec	ARG1	UNKNOWN	SYBR	None	1	0.768731	1.30085	31.315	31.4348	0.136056		14.2057	0.136668	0	true	0.174711	true	3	26			1.32403	0.971984	80.8574			N
363	P3	false	Vec	ARG1	UNKNOWN	SYBR	None	1	0.768731	1.30085	31.706	31.4348	0.136056		14.2057	0.136668	0	true	0.174711	true	3	26			1.31538	0.964094	80.8574			N
364	P4	false	HBx	ARG1	UNKNOWN	SYBR	None	0.761429	0.446136	1.29955	32.242	31.8274	0.277673		14.5989	0.277775	0.393218	true	0.174711	true	3	27			1.32415	0.961003	80.8574			N
365	P5	false	HBx	ARG1	UNKNOWN	SYBR	None	0.761429	0.446136	1.29955	31.3	31.8274	0.277673		14.5989	0.277775	0.393218	true	0.174711	true	3	26			1.32974	0.969758	80.8574			N
366	P6	false	HBx	ARG1	UNKNOWN	SYBR	None	0.761429	0.446136	1.29955	31.94	31.8274	0.277673		14.5989	0.277775	0.393218	true	0.174711	true	3	26			1.31718	0.958529	80.8574			N
Analysis Type	Singleplex
Endogenous Control	CYC
RQ Min/Max Confidence Level	95.0
Reference Sample	Vec

## Sheet: Melt Curve Raw Data
Block Type	384-Well Block
Calibration Background is expired	Yes
Calibration Background performed on	10-12-2018 11:47:46 PDT
Calibration FAM is expired	Yes
Calibration FAM performed on	10-23-2018 10:23:19 PDT
Calibration MELTDOCTOR is expired	Yes
Calibration MELTDOCTOR performed on	09-26-2017 21:22:46 PDT
Calibration NED is expired	Yes
Calibration NED performed on	10-23-2018 10:33:14 PDT
Calibration ROI is expired	Yes
Calibration ROI performed on	10-12-2018 09:37:21 PDT
Calibration ROX is expired	Yes
Calibration ROX performed on	10-23-2018 10:07:21 PDT
Calibration SYBR is expired	Yes
Calibration SYBR performed on	10-23-2018 09:57:53 PDT
Calibration TAMRA is expired	Yes
Calibration TAMRA performed on	10-23-2018 10:45:25 PDT
Calibration Uniformity is expired	Yes
Calibration Uniformity performed on	10-12-2018 10:06:59 PDT
Calibration VIC is expired	Yes
Calibration VIC performed on	10-23-2018 10:54:25 PDT
Chemistry	SYBR_GREEN
Date Created	10-14-2020 17:18:57 PDT
Experiment File Name	D:\NZZ\2020-10-14 154309.eds
Experiment Name	2020-10-14 154309
Experiment Run End Time	10-14-2020 10:13:03 PDT
Experiment Type	Comparative Cт (ΔΔCт)
Instrument Name	285880860
Instrument Serial Number	285880860
Instrument Type	QuantStudio 12K Flex
Passive Reference	ROX
Quantification Cycle Method	Ct
Signal Smoothing On	true
Stage/ Cycle where Analysis is performed	Stage 2, Step 2
Well	Well Position	Reading	Temperature	Fluorescence	Derivative
289	M1	1	60.1535	1.47063	0.0800523
289	M1	2	60.4107	1.46319	0.080421
289	M1	3	60.6679	1.45283	0.0807647
289	M1	4	60.9251	1.44078	0.0810682
289	M1	5	61.1823	1.43704	0.0813712
289	M1	6	61.4395	1.43039	0.0817354
289	M1	7	61.6966	1.41296	0.0822036
289	M1	8	61.9538	1.40519	0.0827691
289	M1	9	62.211	1.39717	0.0833342
289	M1	10	62.4682	1.39163	0.0836986
289	M1	11	62.7254	1.37919	0.0836079
289	M1	12	62.9826	1.36459	0.0828927
289	M1	13	63.2398	1.357	0.0816134
289	M1	14	63.497	1.34629	0.0801121
289	M1	15	63.7542	1.33844	0.0788862
289	M1	16	64.0114	1.33126	0.0783582
289	M1	17	64.2686	1.32282	0.0786578
289	M1	18	64.5257	1.31604	0.0795557
289	M1	19	64.7829	1.30664	0.0805838
289	M1	20	65.0401	1.29241	0.0812576
289	M1	21	65.2973	1.28276	0.0812811
289	M1	22	65.5545	1.27487	0.0806254
289	M1	23	65.8117	1.26545	0.0794841
289	M1	24	66.0689	1.25686	0.0781684
289	M1	25	66.3261	1.24605	0.077017
289	M1	26	66.5833	1.23844	0.076326
289	M1	27	66.8405	1.22911	0.0762942
289	M1	28	67.0977	1.22476	0.0769546
289	M1	29	67.3549	1.21158	0.0781352
289	M1	30	67.612	1.20701	0.0794886
289	M1	31	67.8692	1.19361	0.0806027
289	M1	32	68.1264	1.18415	0.0811549
289	M1	33	68.3836	1.17386	0.0810417
289	M1	34	68.6408	1.16345	0.0804167
289	M1	35	68.898	1.15589	0.0796245
289	M1	36	69.1552	1.1459	0.0790501
289	M1	37	69.4124	1.13736	0.0789525
289	M1	38	69.6696	1.13153	0.0793472
289	M1	39	69.9268	1.12252	0.0800011
289	M1	40	70.184	1.10936	0.080534
289	M1	41	70.4411	1.10032	0.0805871
289	M1	42	70.6983	1.09106	0.0799881
289	M1	43	70.9555	1.08208	0.0788319
289	M1	44	71.2127	1.07121	0.0774589
289	M1	45	71.4699	1.05928	0.0763177
289	M1	46	71.7271	1.0584	0.0757707
289	M1	47	71.9843	1.05004	0.0759299
289	M1	48	72.2415	1.0395	0.0766244
289	M1	49	72.4987	1.02846	0.0775169
289	M1	50	72.7559	1.01979	0.0782955
289	M1	51	73.0131	1.01038	0.0788125
289	M1	52	73.2702	1.0008	0.0790947
289	M1	53	73.5274	0.992458	0.0792369
289	M1	54	73.7846	0.984662	0.0792878
289	M1	55	74.0418	0.975997	0.0792212
289	M1	56	74.299	0.963142	0.0790149
289	M1	57	74.5562	0.954667	0.078788
289	M1	58	74.8134	0.945261	0.0789008
289	M1	59	75.0706	0.937622	0.0799796
289	M1	60	75.3278	0.930855	0.082891
289	M1	61	75.585	0.920355	0.0887306
289	M1	62	75.8422	0.910915	0.0988606
289	M1	63	76.0993	0.905374	0.114957
289	M1	64	76.3565	0.888786	0.138942
289	M1	65	76.6137	0.879728	0.172668
289	M1	66	76.8709	0.861755	0.217308
289	M1	67	77.1281	0.844329	0.272586
289	M1	68	77.3853	0.815474	0.336151
289	M1	69	77.6425	0.775498	0.403466
289	M1	70	77.8997	0.706517	0.468369
289	M1	71	78.1569	0.637183	0.524183
289	M1	72	78.4141	0.558426	0.564957
289	M1	73	78.6713	0.475619	0.586448
289	M1	74	78.9285	0.393576	0.586612
289	M1	75	79.1856	0.315287	0.565651
289	M1	76	79.4428	0.242669	0.525773
289	M1	77	79.7	0.180969	0.470813
289	M1	78	79.9572	0.129046	0.405753
289	M1	79	80.2144	0.0909007	0.336131
289	M1	80	80.4716	0.0641638	0.267358
289	M1	81	80.7288	0.0489325	0.20403
289	M1	82	80.986	0.0395441	0.149388
289	M1	83	81.2432	0.0341281	0.105066
289	M1	84	81.5004	0.0319043	0.0711756
289	M1	85	81.7576	0.0293109	0.0466827
289	M1	86	82.0147	0.0281878	0.0299025
289	M1	87	82.2719	0.0281962	0.0189693
289	M1	88	82.5291	0.0271983	0.012166
289	M1	89	82.7863	0.0272682	0.00809399
289	M1	90	83.0435	0.0265716	0.00571717
289	M1	91	83.3007	0.025815	0.00433389
289	M1	92	83.5579	0.0255752	0.0035139
289	M1	93	83.8151	0.0252516	0.0030208
289	M1	94	84.0723	0.0254188	0.00273343
289	M1	95	84.3295	0.0252907	0.0025821
289	M1	96	84.5867	0.0247442	0.00251279
289	M1	97	84.8438	0.0242715	0.00248011
289	M1	98	85.101	0.023783	0.00245435
289	M1	99	85.3582	0.0236984	0.00242448
289	M1	100	85.6154	0.0238786	0.00238951
289	M1	101	85.8726	0.0234697	0.00234557
289	M1	102	86.1298	0.0226249	0.00228109
289	M1	103	86.387	0.022854	0.00218458
289	M1	104	86.6442	0.0221876	0.00205838
289	M1	105	86.9014	0.0224147	0.00192555
289	M1	106	87.1586	0.0215536	0.00182243
289	M1	107	87.4158	0.0221285	0.0017791
289	M1	108	87.673	0.0219749	0.00179954
289	M1	109	87.9301	0.0212804	0.0018561
289	M1	110	88.1873	0.0209711	0.00190458
289	M1	111	88.4445	0.0205845	0.00191164
289	M1	112	88.7017	0.0205176	0.00187557
289	M1	113	88.9589	0.0204416	0.00182469
289	M1	114	89.2161	0.0206482	0.00179516
289	M1	115	89.4733	0.0198559	0.00180412
289	M1	116	89.7305	0.0202792	0.00183816
289	M1	117	89.9877	0.0192976	0.00186319
289	M1	118	90.2449	0.0191454	0.00184667
289	M1	119	90.5021	0.0189972	0.00177583
289	M1	120	90.7592	0.0194437	0.00166176
289	M1	121	91.0164	0.0184493	0.001531
289	M1	122	91.2736	0.0185832	0.00141297
289	M1	123	91.5308	0.0184285	0.00132987
289	M1	124	91.788	0.0189791	0.00129072
289	M1	125	92.0452	0.0179435	0.00129008
289	M1	126	92.3024	0.0182655	0.00131245
289	M1	127	92.5596	0.0177977	0.00134062
289	M1	128	92.8168	0.0175589	0.00136236
289	M1	129	93.074	0.0178499	0.00136966
289	M1	130	93.3312	0.0179062	0.00135264
289	M1	131	93.5883	0.0167318	0.00129657
289	M1	132	93.8455	0.0171936	0.00118781
289	M1	133	94.1027	0.0166032	0.00102451
289	M1	134	94.3599	0.0172925	0.000821915
289	M1	135	94.6171	0.0168448	0.000607143
289	M1	136	94.8743	0.016619	0.00040787
290	M2	1	60.1535	1.48876	0.0790569
290	M2	2	60.4107	1.47974	0.0788163
290	M2	3	60.6679	1.47497	0.0787041
290	M2	4	60.9251	1.46553	0.0787937
290	M2	5	61.1823	1.45895	0.079059
290	M2	6	61.4395	1.44776	0.0793778
290	M2	7	61.6966	1.43865	0.0796005
290	M2	8	61.9538	1.42652	0.0796545
290	M2	9	62.211	1.41986	0.079607
290	M2	10	62.4682	1.41014	0.0796409
290	M2	11	62.7254	1.39922	0.0799557
290	M2	12	62.9826	1.39376	0.0806507
290	M2	13	63.2398	1.38296	0.0816545
290	M2	14	63.497	1.37475	0.0827443
290	M2	15	63.7542	1.36362	0.0836335
290	M2	16	64.0114	1.35192	0.0840745
290	M2	17	64.2686	1.34109	0.0839159
290	M2	18	64.5257	1.33484	0.0831126
290	M2	19	64.7829	1.32468	0.0817249
290	M2	20	65.0401	1.31212	0.0799297
290	M2	21	65.2973	1.3004	0.0780385
290	M2	22	65.5545	1.2979	0.0764505
290	M2	23	65.8117	1.28379	0.0755355
290	M2	24	66.0689	1.28288	0.0754899
290	M2	25	66.3261	1.27026	0.0762596
290	M2	26	66.5833	1.26285	0.0775742
290	M2	27	66.8405	1.25387	0.0790666
290	M2	28	67.0977	1.23955	0.080397
290	M2	29	67.3549	1.23388	0.0813247
290	M2	30	67.612	1.22635	0.0817229
290	M2	31	67.8692	1.21158	0.081586
290	M2	32	68.1264	1.20212	0.0810242
290	M2	33	68.3836	1.19267	0.0802364
290	M2	34	68.6408	1.1857	0.0794434
290	M2	35	68.898	1.17695	0.0788057
290	M2	36	69.1552	1.16715	0.078385
290	M2	37	69.4124	1.15785	0.0781734
290	M2	38	69.6696	1.14744	0.0781476
290	M2	39	69.9268	1.1392	0.0782907
290	M2	40	70.184	1.13145	0.078567
290	M2	41	70.4411	1.12331	0.0788824
290	M2	42	70.6983	1.11235	0.0791008
290	M2	43	70.9555	1.10177	0.079114
290	M2	44	71.2127	1.09269	0.0789189
290	M2	45	71.4699	1.08246	0.078629
290	M2	46	71.7271	1.07645	0.0784109
290	M2	47	71.9843	1.06562	0.078392
290	M2	48	72.2415	1.05895	0.0786055
290	M2	49	72.4987	1.04616	0.0790031
290	M2	50	72.7559	1.03837	0.0795024
290	M2	51	73.0131	1.02814	0.080025
290	M2	52	73.2702	1.02248	0.0805031
290	M2	53	73.5274	1.00937	0.0808782
290	M2	54	73.7846	1.00046	0.0811078
290	M2	55	74.0418	0.989911	0.0811828
290	M2	56	74.299	0.982284	0.0811534
290	M2	57	74.5562	0.974049	0.0811655
290	M2	58	74.8134	0.961102	0.0815221
290	M2	59	75.0706	0.951607	0.0827611
290	M2	60	75.3278	0.945277	0.0857202
290	M2	61	75.585	0.93517	0.0915712
290	M2	62	75.8422	0.926619	0.101812
290	M2	63	76.0993	0.916859	0.118221
290	M2	64	76.3565	0.907348	0.142737
290	M2	65	76.6137	0.890997	0.177157
290	M2	66	76.8709	0.87386	0.222594
290	M2	67	77.1281	0.855886	0.278755
290	M2	68	77.3853	0.825825	0.343302
290	M2	69	77.6425	0.785533	0.411665
290	M2	70	77.8997	0.716288	0.477532
290	M2	71	78.1569	0.644075	0.533953
290	M2	72	78.4141	0.561316	0.574665
290	M2	73	78.6713	0.47645	0.595201
290	M2	74	78.9285	0.392454	0.593483
290	M2	75	79.1856	0.312629	0.569901
290	M2	76	79.4428	0.239534	0.527025
290	M2	77	79.7	0.177288	0.469135
290	M2	78	79.9572	0.126591	0.401631
290	M2	79	80.2144	0.089494	0.330354
290	M2	80	80.4716	0.064822	0.260842
290	M2	81	80.7288	0.0501394	0.197624
290	M2	82	80.986	0.0418326	0.14372
290	M2	83	81.2432	0.0365674	0.100471
290	M2	84	81.5004	0.0334531	0.0677165
290	M2	85	81.7576	0.0322345	0.0442316
290	M2	86	82.0147	0.030612	0.0282447
290	M2	87	82.2719	0.0303911	0.0178875
290	M2	88	82.5291	0.03006	0.0114865
290	M2	89	82.7863	0.0297248	0.00769648
290	M2	90	83.0435	0.029272	0.00552224
290	M2	91	83.3007	0.0283413	0.0042832
290	M2	92	83.5579	0.0284047	0.00355561
290	M2	93	83.8151	0.0274504	0.0031053
290	M2	94	84.0723	0.0278375	0.00281788
290	M2	95	84.3295	0.0279426	0.00263694
290	M2	96	84.5867	0.0269627	0.00252341
290	M2	97	84.8438	0.0268883	0.0024404
290	M2	98	85.101	0.0262253	0.00235651
290	M2	99	85.3582	0.0264996	0.00225407
290	M2	100	85.6154	0.026176	0.00213313
290	M2	101	85.8726	0.0255498	0.00200905
290	M2	102	86.1298	0.025254	0.00190537
290	M2	103	86.387	0.0257297	0.00184393
290	M2	104	86.6442	0.0252684	0.00183454
290	M2	105	86.9014	0.0251845	0.00186911
290	M2	106	87.1586	0.0245151	0.001924
290	M2	107	87.4158	0.0245492	0.0019709
290	M2	108	87.673	0.0239048	0.00199033
290	M2	109	87.9301	0.023977	0.00198061
290	M2	110	88.1873	0.0236251	0.00195699
290	M2	111	88.4445	0.023221	0.00194085
290	M2	112	88.7017	0.023764	0.0019447
290	M2	113	88.9589	0.0232181	0.00196278
290	M2	114	89.2161	0.0224426	0.00197472
290	M2	115	89.4733	0.0223518	0.00196022
290	M2	116	89.7305	0.0222611	0.00191294
290	M2	117	89.9877	0.0221751	0.00184202
290	M2	118	90.2449	0.0221878	0.00176055
290	M2	119	90.5021	0.0215929	0.00167244
290	M2	120	90.7592	0.0213032	0.00156979
290	M2	121	91.0164	0.0215214	0.00144289
290	M2	122	91.2736	0.0209381	0.00129474
290	M2	123	91.5308	0.0213738	0.00114893
290	M2	124	91.788	0.0204269	0.00104458
290	M2	125	92.0452	0.0212559	0.00101859
290	M2	126	92.3024	0.0212745	0.00108342
290	M2	127	92.5596	0.0210152	0.00121437
290	M2	128	92.8168	0.0203204	0.00135797
290	M2	129	93.074	0.0198465	0.00145906
290	M2	130	93.3312	0.0199992	0.00148836
290	M2	131	93.5883	0.0198785	0.0014495
290	M2	132	93.8455	0.0200696	0.00136165
290	M2	133	94.1027	0.0200868	0.00123587
290	M2	134	94.3599	0.0186132	0.00106767
290	M2	135	94.6171	0.0194377	0.000851333
290	M2	136	94.8743	0.0190005	0.00059939
291	M3	1	60.1535	1.46313	0.0824789
291	M3	2	60.4107	1.45565	0.0832579
291	M3	3	60.6679	1.44659	0.0839587
291	M3	4	60.9251	1.43438	0.0843547
291	M3	5	61.1823	1.42624	0.0843071
291	M3	6	61.4395	1.41664	0.0838254
291	M3	7	61.6966	1.40357	0.0830812
291	M3	8	61.9538	1.39334	0.0823592
291	M3	9	62.211	1.38647	0.0819552
291	M3	10	62.4682	1.37705	0.0820512
291	M3	11	62.7254	1.36877	0.0826306
291	M3	12	62.9826	1.35835	0.0834811
291	M3	13	63.2398	1.34625	0.0842885
291	M3	14	63.497	1.33719	0.0847776
291	M3	15	63.7542	1.32771	0.0848354
291	M3	16	64.0114	1.31552	0.084553
291	M3	17	64.2686	1.30246	0.0841668
291	M3	18	64.5257	1.29608	0.0839082
291	M3	19	64.7829	1.29106	0.0838621
291	M3	20	65.0401	1.27766	0.0839216
291	M3	21	65.2973	1.26724	0.0838868
291	M3	22	65.5545	1.25394	0.0836236
291	M3	23	65.8117	1.24471	0.0831625
291	M3	24	66.0689	1.23778	0.0826604
291	M3	25	66.3261	1.22818	0.082277
291	M3	26	66.5833	1.21682	0.0820681
291	M3	27	66.8405	1.20922	0.0819793
291	M3	28	67.0977	1.19587	0.0819214
291	M3	29	67.3549	1.18848	0.0818556
291	M3	30	67.612	1.17631	0.0818262
291	M3	31	67.8692	1.16959	0.0819275
291	M3	32	68.1264	1.15842	0.0822369
291	M3	33	68.3836	1.14995	0.0827568
291	M3	34	68.6408	1.13693	0.0833847
291	M3	35	68.898	1.13212	0.0839298
291	M3	36	69.1552	1.11768	0.0841733
291	M3	37	69.4124	1.11112	0.0839705
291	M3	38	69.6696	1.0956	0.0833335
291	M3	39	69.9268	1.08504	0.0824464
291	M3	40	70.184	1.07947	0.0815724
291	M3	41	70.4411	1.07184	0.080911
291	M3	42	70.6983	1.06192	0.0805055
291	M3	43	70.9555	1.04711	0.0802539
291	M3	44	71.2127	1.04128	0.0800063
291	M3	45	71.4699	1.03137	0.0796646
291	M3	46	71.7271	1.02226	0.0792278
291	M3	47	71.9843	1.01027	0.0787743
291	M3	48	72.2415	1.00243	0.0784017
291	M3	49	72.4987	0.993602	0.0781689
291	M3	50	72.7559	0.986253	0.0780673
291	M3	51	73.0131	0.975785	0.0780429
291	M3	52	73.2702	0.963117	0.0780495
291	M3	53	73.5274	0.955318	0.078086
291	M3	54	73.7846	0.948851	0.0781883
291	M3	55	74.0418	0.939002	0.0783884
291	M3	56	74.299	0.92836	0.078695
291	M3	57	74.5562	0.918716	0.0791263
291	M3	58	74.8134	0.908894	0.0797902
291	M3	59	75.0706	0.902092	0.0809774
291	M3	60	75.3278	0.889487	0.0832404
291	M3	61	75.585	0.881397	0.087456
291	M3	62	75.8422	0.872513	0.0948727
291	M3	63	76.0993	0.862742	0.107121
291	M3	64	76.3565	0.852115	0.126149
291	M3	65	76.6137	0.842296	0.154014
291	M3	66	76.8709	0.82384	0.192455
291	M3	67	77.1281	0.807875	0.242258
291	M3	68	77.3853	0.785473	0.302509
291	M3	69	77.6425	0.747378	0.370014
291	M3	70	77.8997	0.699447	0.439198
291	M3	71	78.1569	0.630439	0.50267
291	M3	72	78.4141	0.547933	0.552428
291	M3	73	78.6713	0.458842	0.581398
291	M3	74	78.9285	0.367685	0.584898
291	M3	75	79.1856	0.281047	0.561633
291	M3	76	79.4428	0.201862	0.514011
291	M3	77	79.7	0.139456	0.447701
291	M3	78	79.9572	0.0938147	0.370532
291	M3	79	80.2144	0.0665269	0.290974
291	M3	80	80.4716	0.0529347	0.216573
291	M3	81	80.7288	0.0470693	0.152731
291	M3	82	80.986	0.0438726	0.102152
291	M3	83	81.2432	0.0428246	0.0650058
291	M3	84	81.5004	0.0420029	0.0396381
291	M3	85	81.7576	0.0409518	0.0234829
291	M3	86	82.0147	0.040477	0.0138637
291	M3	87	82.2719	0.040786	0.00850074
291	M3	88	82.5291	0.0403805	0.00570869
291	M3	89	82.7863	0.0395704	0.00437288
291	M3	90	83.0435	0.0386116	0.00382075
291	M3	91	83.3007	0.0399198	0.00367404
291	M3	92	83.5579	0.038482	0.00372684
291	M3	93	83.8151	0.037904	0.00386369
291	M3	94	84.0723	0.0377119	0.00401404
291	M3	95	84.3295	0.0369752	0.00413193
291	M3	96	84.5867	0.0366712	0.0041892
291	M3	97	84.8438	0.0362087	0.00417441
291	M3	98	85.101	0.0350487	0.00409286
291	M3	99	85.3582	0.034862	0.00396357
291	M3	100	85.6154	0.0346097	0.0038112
291	M3	101	85.8726	0.034431	0.0036543
291	M3	102	86.1298	0.0334386	0.00349698
291	M3	103	86.387	0.0334265	0.00332986
291	M3	104	86.6442	0.0329631	0.00314004
291	M3	105	86.9014	0.0322418	0.00292459
291	M3	106	87.1586	0.0320305	0.00270027
291	M3	107	87.4158	0.0318469	0.00250564
291	M3	108	87.673	0.0312892	0.0023951
291	M3	109	87.9301	0.0315664	0.00242712
291	M3	110	88.1873	0.0312418	0.00264958
291	M3	111	88.4445	0.0313516	0.00308715
291	M3	112	88.7017	0.0300164	0.00373498
291	M3	113	88.9589	0.0302456	0.00456116
291	M3	114	89.2161	0.02963	0.00551593
291	M3	115	89.4733	0.0278565	0.00654333
291	M3	116	89.7305	0.0275672	0.00758993
291	M3	117	89.9877	0.0261722	0.00860647
291	M3	118	90.2449	0.0251682	0.00954252
291	M3	119	90.5021	0.0235421	0.0103396
291	M3	120	90.7592	0.022336	0.0109319
291	M3	121	91.0164	0.0203844	0.0112598
291	M3	122	91.2736	0.0185691	0.0112904
291	M3	123	91.5308	0.0175742	0.0110326
291	M3	124	91.788	0.0166682	0.0105385
291	M3	125	92.0452	0.0152623	0.00989104
291	M3	126	92.3024	0.0140064	0.00918938
291	M3	127	92.5596	0.013024	0.00853523
291	M3	128	92.8168	0.0126743	0.00801513
291	M3	129	93.074	0.0125755	0.0076742
291	M3	130	93.3312	0.0111322	0.00748922
291	M3	131	93.5883	0.00995449	0.0073597
291	M3	132	93.8455	0.00909311	0.00713168
291	M3	133	94.1027	0.00811691	0.00665211
291	M3	134	94.3599	0.00693112	0.00583341
291	M3	135	94.6171	0.00588962	0.00469959
291	M3	136	94.8743	0.00529929	0.00338903
292	M4	1	60.1535	1.47255	0.08493
292	M4	2	60.4107	1.46541	0.0855183
292	M4	3	60.6679	1.45497	0.0860484
292	M4	4	60.9251	1.45205	0.0863899
292	M4	5	61.1823	1.43707	0.0865055
292	M4	6	61.4395	1.4287	0.0864475
292	M4	7	61.6966	1.42214	0.0862979
292	M4	8	61.9538	1.41424	0.0861099
292	M4	9	62.211	1.40563	0.0858983
292	M4	10	62.4682	1.39147	0.0856808
292	M4	11	62.7254	1.38694	0.0855197
292	M4	12	62.9826	1.37611	0.0854985
292	M4	13	63.2398	1.37165	0.0856518
292	M4	14	63.497	1.36013	0.0859139
292	M4	15	63.7542	1.3511	0.0861408
292	M4	16	64.0114	1.34334	0.0861832
292	M4	17	64.2686	1.33026	0.0859599
292	M4	18	64.5257	1.3269	0.0854875
292	M4	19	64.7829	1.31475	0.0848551
292	M4	20	65.0401	1.30785	0.0841896
292	M4	21	65.2973	1.29691	0.0836241
292	M4	22	65.5545	1.29091	0.0832602
292	M4	23	65.8117	1.2805	0.0831332
292	M4	24	66.0689	1.27655	0.0831999
292	M4	25	66.3261	1.26297	0.083372
292	M4	26	66.5833	1.25743	0.0835873
292	M4	27	66.8405	1.24529	0.0838714
292	M4	28	67.0977	1.2391	0.0843392
292	M4	29	67.3549	1.2297	0.0851118
292	M4	30	67.612	1.22353	0.0862163
292	M4	31	67.8692	1.21224	0.0875218
292	M4	32	68.1264	1.20503	0.0887715
292	M4	33	68.3836	1.19409	0.0896881
292	M4	34	68.6408	1.18326	0.0900962
292	M4	35	68.898	1.17504	0.0900003
292	M4	36	69.1552	1.1649	0.0895875
292	M4	37	69.4124	1.15723	0.0891563
292	M4	38	69.6696	1.14617	0.0889975
292	M4	39	69.9268	1.1396	0.0892701
292	M4	40	70.184	1.13017	0.0899211
292	M4	41	70.4411	1.12334	0.0906849
292	M4	42	70.6983	1.11039	0.0911885
292	M4	43	70.9555	1.1013	0.0911326
292	M4	44	71.2127	1.08984	0.0904443
292	M4	45	71.4699	1.08141	0.0893251
292	M4	46	71.7271	1.0719	0.0881447
292	M4	47	71.9843	1.06322	0.0872498
292	M4	48	72.2415	1.06009	0.08679
292	M4	49	72.4987	1.0459	0.0866733
292	M4	50	72.7559	1.03731	0.0866686
292	M4	51	73.0131	1.02975	0.0865776
292	M4	52	73.2702	1.01732	0.0863691
292	M4	53	73.5274	1.01073	0.0861986
292	M4	54	73.7846	1.00417	0.0863255
292	M4	55	74.0418	0.993245	0.0869878
292	M4	56	74.299	0.983842	0.088311
292	M4	57	74.5562	0.979127	0.0902876
292	M4	58	74.8134	0.967383	0.0928473
292	M4	59	75.0706	0.956118	0.0959939
292	M4	60	75.3278	0.948223	0.0999771
292	M4	61	75.585	0.935614	0.105461
292	M4	62	75.8422	0.927016	0.113639
292	M4	63	76.0993	0.916984	0.126277
292	M4	64	76.3565	0.903216	0.145615
292	M4	65	76.6137	0.895296	0.174072
292	M4	66	76.8709	0.876815	0.213652
292	M4	67	77.1281	0.862698	0.265097
292	M4	68	77.3853	0.839809	0.327001
292	M4	69	77.6425	0.811733	0.395278
292	M4	70	77.8997	0.755059	0.463353
292	M4	71	78.1569	0.693044	0.523189
292	M4	72	78.4141	0.618874	0.566918
292	M4	73	78.6713	0.539293	0.588545
292	M4	74	78.9285	0.462948	0.585205
292	M4	75	79.1856	0.390437	0.55764
292	M4	76	79.4428	0.330068	0.509869
292	M4	77	79.7	0.280037	0.448265
292	M4	78	79.9572	0.243033	0.380318
292	M4	79	80.2144	0.216126	0.313416
292	M4	80	80.4716	0.197916	0.253824
292	M4	81	80.7288	0.18554	0.205957
292	M4	82	80.986	0.177258	0.171963
292	M4	83	81.2432	0.16963	0.151559
292	M4	84	81.5004	0.162536	0.142192
292	M4	85	81.7576	0.149657	0.13958
292	M4	86	82.0147	0.132965	0.138683
292	M4	87	82.2719	0.109074	0.134986
292	M4	88	82.5291	0.0847148	0.125696
292	M4	89	82.7863	0.0669119	0.110391
292	M4	90	83.0435	0.0622654	0.0908192
292	M4	91	83.3007	0.0603488	0.0699464
292	M4	92	83.5579	0.0598363	0.0507247
292	M4	93	83.8151	0.0583956	0.0351431
292	M4	94	84.0723	0.0573202	0.0238871
292	M4	95	84.3295	0.0571184	0.0165679
292	M4	96	84.5867	0.0557663	0.0122319
292	M4	97	84.8438	0.0546658	0.00984432
292	M4	98	85.101	0.0543634	0.00857382
292	M4	99	85.3582	0.0531674	0.00787159
292	M4	100	85.6154	0.0526105	0.00742144
292	M4	101	85.8726	0.0522427	0.00705374
292	M4	102	86.1298	0.0510497	0.00667948
292	M4	103	86.387	0.0506803	0.00626095
292	M4	104	86.6442	0.0488848	0.00580406
292	M4	105	86.9014	0.0498839	0.0053488
292	M4	106	87.1586	0.0482953	0.00494446
292	M4	107	87.4158	0.0487709	0.0046169
292	M4	108	87.673	0.0476954	0.00434804
292	M4	109	87.9301	0.0474257	0.00408413
292	M4	110	88.1873	0.0465865	0.00377015
292	M4	111	88.4445	0.0462888	0.00338924
292	M4	112	88.7017	0.0460443	0.00298155
292	M4	113	88.9589	0.0465558	0.00263001
292	M4	114	89.2161	0.0458308	0.00242339
292	M4	115	89.4733	0.0463031	0.00241882
292	M4	116	89.7305	0.0452996	0.00262457
292	M4	117	89.9877	0.0458448	0.00300717
292	M4	118	90.2449	0.0447125	0.00351223
292	M4	119	90.5021	0.0443249	0.0040837
292	M4	120	90.7592	0.044372	0.00467061
292	M4	121	91.0164	0.0432608	0.00522185
292	M4	122	91.2736	0.0428681	0.00567804
292	M4	123	91.5308	0.0418812	0.00597153
292	M4	124	91.788	0.0412047	0.00603918
292	M4	125	92.0452	0.0402672	0.00584328
292	M4	126	92.3024	0.039802	0.0053887
292	M4	127	92.5596	0.0389328	0.00472601
292	M4	128	92.8168	0.0395064	0.00393854
292	M4	129	93.074	0.038984	0.00312095
292	M4	130	93.3312	0.038116	0.00235939
292	M4	131	93.5883	0.0389059	0.00171776
292	M4	132	93.8455	0.0386559	0.00122849
292	M4	133	94.1027	0.0391621	0.000887385
292	M4	134	94.3599	0.0386092	0.000658041
292	M4	135	94.6171	0.0378403	0.000489892
292	M4	136	94.8743	0.0385481	0.000343024
293	M5	1	60.1535	1.39268	0.0874504
293	M5	2	60.4107	1.3836	0.0875662
293	M5	3	60.6679	1.37629	0.0876641
293	M5	4	60.9251	1.36497	0.0878043
293	M5	5	61.1823	1.36125	0.0880965
293	M5	6	61.4395	1.34966	0.0886312
293	M5	7	61.6966	1.33835	0.0893963
293	M5	8	61.9538	1.33315	0.0902378
293	M5	9	62.211	1.32128	0.0908934
293	M5	10	62.4682	1.31599	0.0911038
293	M5	11	62.7254	1.29885	0.0907451
293	M5	12	62.9826	1.28951	0.0899114
293	M5	13	63.2398	1.28359	0.0888831
293	M5	14	63.497	1.27681	0.0879914
293	M5	15	63.7542	1.26333	0.0874765
293	M5	16	64.0114	1.25709	0.0874071
293	M5	17	64.2686	1.24827	0.0877003
293	M5	18	64.5257	1.23997	0.0881997
293	M5	19	64.7829	1.22808	0.0887579
293	M5	20	65.0401	1.22065	0.0892743
293	M5	21	65.2973	1.20875	0.0896826
293	M5	22	65.5545	1.20485	0.0899139
293	M5	23	65.8117	1.19119	0.0898798
293	M5	24	66.0689	1.18272	0.0895103
293	M5	25	66.3261	1.1728	0.0888151
293	M5	26	66.5833	1.16226	0.0879193
293	M5	27	66.8405	1.15454	0.0870235
293	M5	28	67.0977	1.14551	0.0863174
293	M5	29	67.3549	1.13943	0.0858989
293	M5	30	67.612	1.12676	0.0857591
293	M5	31	67.8692	1.11918	0.0858309
293	M5	32	68.1264	1.11171	0.0860585
293	M5	33	68.3836	1.09902	0.0864239
293	M5	34	68.6408	1.09255	0.086926
293	M5	35	68.898	1.08619	0.0875337
293	M5	36	69.1552	1.07333	0.088168
293	M5	37	69.4124	1.06546	0.0887346
293	M5	38	69.6696	1.05486	0.089175
293	M5	39	69.9268	1.04784	0.0894912
293	M5	40	70.184	1.03443	0.0897123
293	M5	41	70.4411	1.02931	0.0898404
293	M5	42	70.6983	1.0207	0.0898288
293	M5	43	70.9555	1.00894	0.0896236
293	M5	44	71.2127	0.996459	0.0892374
293	M5	45	71.4699	0.989673	0.0887729
293	M5	46	71.7271	0.981207	0.088372
293	M5	47	71.9843	0.975939	0.0881234
293	M5	48	72.2415	0.960266	0.0880194
293	M5	49	72.4987	0.954488	0.0879977
293	M5	50	72.7559	0.943136	0.0880211
293	M5	51	73.0131	0.937224	0.0881258
293	M5	52	73.2702	0.923548	0.0883937
293	M5	53	73.5274	0.919308	0.0888771
293	M5	54	73.7846	0.909876	0.0895389
293	M5	55	74.0418	0.897533	0.0902541
293	M5	56	74.299	0.888867	0.0908833
293	M5	57	74.5562	0.882142	0.0913844
293	M5	58	74.8134	0.868191	0.0919397
293	M5	59	75.0706	0.858736	0.0930475
293	M5	60	75.3278	0.851866	0.095576
293	M5	61	75.585	0.843239	0.100783
293	M5	62	75.8422	0.832615	0.110305
293	M5	63	76.0993	0.822742	0.126088
293	M5	64	76.3565	0.814681	0.150216
293	M5	65	76.6137	0.801942	0.184534
293	M5	66	76.8709	0.785777	0.230035
293	M5	67	77.1281	0.765113	0.286102
293	M5	68	77.3853	0.740237	0.349843
293	M5	69	77.6425	0.699824	0.415876
293	M5	70	77.8997	0.644632	0.476854
293	M5	71	78.1569	0.575399	0.524798
293	M5	72	78.4141	0.497695	0.552866
293	M5	73	78.6713	0.417948	0.556997
293	M5	74	78.9285	0.350512	0.536819
293	M5	75	79.1856	0.289667	0.495579
293	M5	76	79.4428	0.239031	0.439206
293	M5	77	79.7	0.201908	0.374928
293	M5	78	79.9572	0.173166	0.309896
293	M5	79	80.2144	0.15468	0.250112
293	M5	80	80.4716	0.142403	0.199807
293	M5	81	80.7288	0.132641	0.161233
293	M5	82	80.986	0.124314	0.134779
293	M5	83	81.2432	0.116988	0.119262
293	M5	84	81.5004	0.108704	0.112282
293	M5	85	81.7576	0.100127	0.110629
293	M5	86	82.0147	0.0877576	0.110761
293	M5	87	82.2719	0.0717905	0.109421
293	M5	88	82.5291	0.0535417	0.104283
293	M5	89	82.7863	0.0370114	0.09445
293	M5	90	83.0435	0.0282236	0.0805546
293	M5	91	83.3007	0.0238859	0.0643724
293	M5	92	83.5579	0.0225839	0.0481072
293	M5	93	83.8151	0.0220356	0.0336568
293	M5	94	84.0723	0.020886	0.0221506
293	M5	95	84.3295	0.0205249	0.0138695
293	M5	96	84.5867	0.0215525	0.00845598
293	M5	97	84.8438	0.0205408	0.00523508
293	M5	98	85.101	0.0203655	0.00348821
293	M5	99	85.3582	0.0206468	0.00261609
293	M5	100	85.6154	0.0199875	0.00219717
293	M5	101	85.8726	0.0195704	0.00197976
293	M5	102	86.1298	0.019666	0.00184299
293	M5	103	86.387	0.0194482	0.00174916
293	M5	104	86.6442	0.0194249	0.00170056
293	M5	105	86.9014	0.0192544	0.00170731
293	M5	106	87.1586	0.018805	0.00176856
293	M5	107	87.4158	0.0189389	0.0018658
293	M5	108	87.673	0.0186613	0.00196632
293	M5	109	87.9301	0.0179608	0.00203443
293	M5	110	88.1873	0.0179919	0.00204657
293	M5	111	88.4445	0.0176388	0.00200276
293	M5	112	88.7017	0.0176047	0.0019271
293	M5	113	88.9589	0.0175325	0.00185542
293	M5	114	89.2161	0.0171757	0.00181559
293	M5	115	89.4733	0.0172105	0.00181116
293	M5	116	89.7305	0.0171408	0.00181751
293	M5	117	89.9877	0.0165426	0.00179484
293	M5	118	90.2449	0.0163359	0.0017125
293	M5	119	90.5021	0.0158859	0.00157016
293	M5	120	90.7592	0.0161	0.00139977
293	M5	121	91.0164	0.0162731	0.00124434
293	M5	122	91.2736	0.0168587	0.00112873
293	M5	123	91.5308	0.0153743	0.00104688
293	M5	124	91.788	0.0153644	0.000976443
293	M5	125	92.0452	0.0156599	0.000907153
293	M5	126	92.3024	0.0158698	0.000856081
293	M5	127	92.5596	0.0156476	0.000855669
293	M5	128	92.8168	0.0154602	0.000924479
293	M5	129	93.074	0.0157532	0.00104445
293	M5	130	93.3312	0.0151122	0.00116154
293	M5	131	93.5883	0.0150913	0.00120953
293	M5	132	93.8455	0.0146088	0.00114309
293	M5	133	94.1027	0.0143666	0.000961361
293	M5	134	94.3599	0.0148365	0.000708988
293	M5	135	94.6171	0.0146327	0.000453631
293	M5	136	94.8743	0.0152363	0.000253265
294	M6	1	60.1535	1.41844	0.0833899
294	M6	2	60.4107	1.4104	0.083152
294	M6	3	60.6679	1.40167	0.0828989
294	M6	4	60.9251	1.39183	0.0827588
294	M6	5	61.1823	1.38652	0.0828503
294	M6	6	61.4395	1.37819	0.0832119
294	M6	7	61.6966	1.36488	0.0837888
294	M6	8	61.9538	1.35446	0.0844659
294	M6	9	62.211	1.34967	0.0851231
294	M6	10	62.4682	1.33762	0.0856631
294	M6	11	62.7254	1.3269	0.0860225
294	M6	12	62.9826	1.31782	0.0861619
294	M6	13	63.2398	1.30807	0.0860549
294	M6	14	63.497	1.29809	0.0856708
294	M6	15	63.7542	1.28879	0.0849725
294	M6	16	64.0114	1.27858	0.0839337
294	M6	17	64.2686	1.27013	0.0825888
294	M6	18	64.5257	1.25871	0.0810703
294	M6	19	64.7829	1.24874	0.0796058
294	M6	20	65.0401	1.24266	0.0784425
294	M6	21	65.2973	1.23626	0.0777451
294	M6	22	65.5545	1.22399	0.0775229
294	M6	23	65.8117	1.21804	0.0776428
294	M6	24	66.0689	1.20885	0.0779229
294	M6	25	66.3261	1.19934	0.0782466
294	M6	26	66.5833	1.18845	0.0786168
294	M6	27	66.8405	1.17962	0.0791164
294	M6	28	67.0977	1.17501	0.0797926
294	M6	29	67.3549	1.16439	0.080562
294	M6	30	67.612	1.15614	0.0812181
294	M6	31	67.8692	1.14252	0.081545
294	M6	32	68.1264	1.13589	0.0814601
294	M6	33	68.3836	1.12196	0.0810795
294	M6	34	68.6408	1.11994	0.0806586
294	M6	35	68.898	1.10713	0.080455
294	M6	36	69.1552	1.09748	0.0805971
294	M6	37	69.4124	1.09356	0.0810407
294	M6	38	69.6696	1.08214	0.0816314
294	M6	39	69.9268	1.07021	0.0822184
294	M6	40	70.184	1.06072	0.0827381
294	M6	41	70.4411	1.05238	0.0832052
294	M6	42	70.6983	1.04552	0.0836364
294	M6	43	70.9555	1.03572	0.0839849
294	M6	44	71.2127	1.0245	0.084149
294	M6	45	71.4699	1.01213	0.0840475
294	M6	46	71.7271	1.00436	0.0836791
294	M6	47	71.9843	0.997068	0.0831173
294	M6	48	72.2415	0.986129	0.0824498
294	M6	49	72.4987	0.976911	0.0817335
294	M6	50	72.7559	0.967764	0.0810017
294	M6	51	73.0131	0.95778	0.08031
294	M6	52	73.2702	0.949522	0.0797643
294	M6	53	73.5274	0.940198	0.0795026
294	M6	54	73.7846	0.933414	0.079644
294	M6	55	74.0418	0.924683	0.0802437
294	M6	56	74.299	0.91383	0.0812876
294	M6	57	74.5562	0.903887	0.082731
294	M6	58	74.8134	0.898815	0.084584
294	M6	59	75.0706	0.887341	0.0870408
294	M6	60	75.3278	0.874175	0.0906461
294	M6	61	75.585	0.867313	0.09645
294	M6	62	75.8422	0.854376	0.106069
294	M6	63	76.0993	0.848487	0.121586
294	M6	64	76.3565	0.838135	0.145257
294	M6	65	76.6137	0.823563	0.179021
294	M6	66	76.8709	0.808933	0.223873
294	M6	67	77.1281	0.787308	0.279197
294	M6	68	77.3853	0.758871	0.342257
294	M6	69	77.6425	0.715549	0.408123
294	M6	70	77.8997	0.655836	0.470213
294	M6	71	78.1569	0.585604	0.521435
294	M6	72	78.4141	0.503546	0.555629
294	M6	73	78.6713	0.420947	0.568824
294	M6	74	78.9285	0.344289	0.559913
294	M6	75	79.1856	0.275471	0.530583
294	M6	76	79.4428	0.213359	0.484659
294	M6	77	79.7	0.162336	0.427176
294	M6	78	79.9572	0.119185	0.363504
294	M6	79	80.2144	0.0890337	0.298675
294	M6	80	80.4716	0.0655748	0.236928
294	M6	81	80.7288	0.0510148	0.181432
294	M6	82	80.986	0.0430966	0.134149
294	M6	83	81.2432	0.0369854	0.0958601
294	M6	84	81.5004	0.0339586	0.0663304
294	M6	85	81.7576	0.0313973	0.0445992
294	M6	86	82.0147	0.0301615	0.0293112
294	M6	87	82.2719	0.0305741	0.0190093
294	M6	88	82.5291	0.0292105	0.012342
294	M6	89	82.7863	0.0292063	0.00817798
294	M6	90	83.0435	0.0285433	0.00564644
294	M6	91	83.3007	0.0277239	0.00412644
294	M6	92	83.5579	0.0285257	0.00320506
294	M6	93	83.8151	0.0277279	0.00262243
294	M6	94	84.0723	0.0276945	0.00222187
294	M6	95	84.3295	0.0271515	0.00191574
294	M6	96	84.5867	0.0268274	0.00166536
294	M6	97	84.8438	0.0272877	0.00146475
294	M6	98	85.101	0.0263794	0.00132241
294	M6	99	85.3582	0.0274276	0.00124454
294	M6	100	85.6154	0.0269367	0.00122796
294	M6	101	85.8726	0.0258485	0.00126425
294	M6	102	86.1298	0.0262727	0.00134693
294	M6	103	86.387	0.0268957	0.0014721
294	M6	104	86.6442	0.0258063	0.00163146
294	M6	105	86.9014	0.0263403	0.00180597
294	M6	106	87.1586	0.0251819	0.00196726
294	M6	107	87.4158	0.0252502	0.00208638
294	M6	108	87.673	0.0250124	0.00214339
294	M6	109	87.9301	0.0248333	0.00213368
294	M6	110	88.1873	0.0241085	0.00206971
294	M6	111	88.4445	0.0239055	0.00197819
294	M6	112	88.7017	0.0244489	0.0018904
294	M6	113	88.9589	0.0240193	0.00182778
294	M6	114	89.2161	0.0236741	0.00179083
294	M6	115	89.4733	0.0233566	0.00176065
294	M6	116	89.7305	0.0230696	0.00171385
294	M6	117	89.9877	0.0230953	0.00164078
294	M6	118	90.2449	0.0229982	0.00155423
294	M6	119	90.5021	0.0223792	0.00148286
294	M6	120	90.7592	0.0227624	0.00145358
294	M6	121	91.0164	0.0231987	0.00147404
294	M6	122	91.2736	0.0217539	0.00152647
294	M6	123	91.5308	0.022248	0.00157774
294	M6	124	91.788	0.0219187	0.00160064
294	M6	125	92.0452	0.021231	0.00159278
294	M6	126	92.3024	0.0218023	0.00157958
294	M6	127	92.5596	0.0213084	0.00159702
294	M6	128	92.8168	0.0215033	0.00166406
294	M6	129	93.074	0.0211825	0.0017634
294	M6	130	93.3312	0.0212282	0.00184617
294	M6	131	93.5883	0.0197429	0.00185938
294	M6	132	93.8455	0.0194888	0.00177633
294	M6	133	94.1027	0.0207474	0.00160685
294	M6	134	94.3599	0.020492	0.00138128
294	M6	135	94.6171	0.019844	0.00112675
294	M6	136	94.8743	0.0185972	0.00085814
295	M7	1	60.1535	1.67035	0.0877539
295	M7	2	60.4107	1.66743	0.0874338
295	M7	3	60.6679	1.6524	0.0872612
295	M7	4	60.9251	1.64815	0.0873854
295	M7	5	61.1823	1.64397	0.0878469
295	M7	6	61.4395	1.63219	0.088525
295	M7	7	61.6966	1.62273	0.0892121
295	M7	8	61.9538	1.60767	0.0897438
295	M7	9	62.211	1.60428	0.0900941
295	M7	10	62.4682	1.59518	0.0903506
295	M7	11	62.7254	1.58221	0.0906028
295	M7	12	62.9826	1.5762	0.090853
295	M7	13	63.2398	1.56795	0.0910263
295	M7	14	63.497	1.55556	0.091061
295	M7	15	63.7542	1.54414	0.0909931
295	M7	16	64.0114	1.53698	0.0909485
295	M7	17	64.2686	1.52654	0.0910495
295	M7	18	64.5257	1.52413	0.0913133
295	M7	19	64.7829	1.50985	0.0916577
295	M7	20	65.0401	1.49758	0.0920005
295	M7	21	65.2973	1.48795	0.0923543
295	M7	22	65.5545	1.48161	0.0928052
295	M7	23	65.8117	1.47326	0.0934004
295	M7	24	66.0689	1.46362	0.0940481
295	M7	25	66.3261	1.45186	0.0945302
295	M7	26	66.5833	1.44051	0.0946278
295	M7	27	66.8405	1.43226	0.0942584
295	M7	28	67.0977	1.41977	0.0935264
295	M7	29	67.3549	1.41428	0.0926845
295	M7	30	67.612	1.40143	0.0920288
295	M7	31	67.8692	1.39317	0.0917858
295	M7	32	68.1264	1.38343	0.092024
295	M7	33	68.3836	1.37804	0.0926223
295	M7	34	68.6408	1.36546	0.0933262
295	M7	35	68.898	1.35717	0.093872
295	M7	36	69.1552	1.34122	0.0941224
295	M7	37	69.4124	1.33544	0.094116
295	M7	38	69.6696	1.32679	0.0940028
295	M7	39	69.9268	1.3187	0.0939242
295	M7	40	70.184	1.30626	0.0939267
295	M7	41	70.4411	1.29541	0.0939491
295	M7	42	70.6983	1.28765	0.0938678
295	M7	43	70.9555	1.27949	0.0935607
295	M7	44	71.2127	1.26789	0.0929684
295	M7	45	71.4699	1.25631	0.0921406
295	M7	46	71.7271	1.24565	0.0912402
295	M7	47	71.9843	1.24175	0.0904851
295	M7	48	72.2415	1.23053	0.0900499
295	M7	49	72.4987	1.21927	0.089982
295	M7	50	72.7559	1.2151	0.0901978
295	M7	51	73.0131	1.20006	0.0905478
295	M7	52	73.2702	1.19356	0.0909074
295	M7	53	73.5274	1.18369	0.0912316
295	M7	54	73.7846	1.17243	0.0915624
295	M7	55	74.0418	1.1673	0.0919962
295	M7	56	74.299	1.15408	0.0926505
295	M7	57	74.5562	1.14529	0.0936594
295	M7	58	74.8134	1.1375	0.0951885
295	M7	59	75.0706	1.12584	0.0974644
295	M7	60	75.3278	1.11719	0.100803
295	M7	61	75.585	1.10627	0.105649
295	M7	62	75.8422	1.09804	0.112605
295	M7	63	76.0993	1.08274	0.12246
295	M7	64	76.3565	1.07561	0.136187
295	M7	65	76.6137	1.06035	0.15488
295	M7	66	76.8709	1.04476	0.179635
295	M7	67	77.1281	1.03164	0.211383
295	M7	68	77.3853	1.00837	0.250695
295	M7	69	77.6425	0.984243	0.297583
295	M7	70	77.8997	0.949309	0.351299
295	M7	71	78.1569	0.914091	0.410146
295	M7	72	78.4141	0.867555	0.47137
295	M7	73	78.6713	0.814161	0.531241
295	M7	74	78.9285	0.742493	0.585363
295	M7	75	79.1856	0.672158	0.62918
295	M7	76	79.4428	0.595118	0.658553
295	M7	77	79.7	0.516181	0.670265
295	M7	78	79.9572	0.432897	0.662411
295	M7	79	80.2144	0.357644	0.634684
295	M7	80	80.4716	0.284927	0.588536
295	M7	81	80.7288	0.222644	0.527174
295	M7	82	80.986	0.17111	0.455288
295	M7	83	81.2432	0.133577	0.378486
295	M7	84	81.5004	0.107635	0.302484
295	M7	85	81.7576	0.0906704	0.23226
295	M7	86	82.0147	0.0808104	0.171382
295	M7	87	82.2719	0.0752524	0.121695
295	M7	88	82.5291	0.0710554	0.0834027
295	M7	89	82.7863	0.0697955	0.0554674
295	M7	90	83.0435	0.0679664	0.0361295
295	M7	91	83.3007	0.067954	0.0233999
295	M7	92	83.5579	0.0668371	0.015412
295	M7	93	83.8151	0.0664019	0.0106119
295	M7	94	84.0723	0.066038	0.00781745
295	M7	95	84.3295	0.065404	0.00619688
295	M7	96	84.5867	0.0645565	0.00520922
295	M7	97	84.8438	0.0643573	0.00453457
295	M7	98	85.101	0.0637922	0.00400831
295	M7	99	85.3582	0.0639789	0.0035653
295	M7	100	85.6154	0.0628076	0.0031959
295	M7	101	85.8726	0.0629156	0.00291251
295	M7	102	86.1298	0.062993	0.00272585
295	M7	103	86.387	0.0631021	0.00263195
295	M7	104	86.6442	0.0619609	0.00261125
295	M7	105	86.9014	0.0620713	0.00263582
295	M7	106	87.1586	0.0614303	0.00267629
295	M7	107	87.4158	0.0620045	0.00270424
295	M7	108	87.673	0.0606646	0.00269335
295	M7	109	87.9301	0.0603227	0.00262693
295	M7	110	88.1873	0.0608013	0.00251097
295	M7	111	88.4445	0.0598454	0.00238156
295	M7	112	88.7017	0.0597013	0.00229372
295	M7	113	88.9589	0.0607983	0.00229314
295	M7	114	89.2161	0.0595	0.00238664
295	M7	115	89.4733	0.0593868	0.00253308
295	M7	116	89.7305	0.0590594	0.00266376
295	M7	117	89.9877	0.0585031	0.00272142
295	M7	118	90.2449	0.0578289	0.00269311
295	M7	119	90.5021	0.0584988	0.00261654
295	M7	120	90.7592	0.0578697	0.00255615
295	M7	121	91.0164	0.057996	0.0025646
295	M7	122	91.2736	0.057256	0.00265218
295	M7	123	91.5308	0.0576824	0.00277999
295	M7	124	91.788	0.0565831	0.00287961
295	M7	125	92.0452	0.0561501	0.002887
295	M7	126	92.3024	0.0559024	0.00277424
295	M7	127	92.5596	0.0559822	0.00256311
295	M7	128	92.8168	0.0553541	0.00231471
295	M7	129	93.074	0.0555445	0.00210023
295	M7	130	93.3312	0.055676	0.00196707
295	M7	131	93.5883	0.0552791	0.00191599
295	M7	132	93.8455	0.0549184	0.00190014
295	M7	133	94.1027	0.0547348	0.0018474
295	M7	134	94.3599	0.0542969	0.00169563
295	M7	135	94.6171	0.0540656	0.0014237
295	M7	136	94.8743	0.0538196	0.00106215
296	M8	1	60.1535	1.63024	0.0861025
296	M8	2	60.4107	1.62146	0.086566
296	M8	3	60.6679	1.61488	0.0869992
296	M8	4	60.9251	1.60397	0.0872892
296	M8	5	61.1823	1.59596	0.0874018
296	M8	6	61.4395	1.58817	0.087412
296	M8	7	61.6966	1.57146	0.0874661
296	M8	8	61.9538	1.56931	0.0876914
296	M8	9	62.211	1.55849	0.0880891
296	M8	10	62.4682	1.55215	0.0884991
296	M8	11	62.7254	1.53842	0.0886765
296	M8	12	62.9826	1.52821	0.0884536
296	M8	13	63.2398	1.5187	0.0878704
296	M8	14	63.497	1.50896	0.0871949
296	M8	15	63.7542	1.5033	0.0868019
296	M8	16	64.0114	1.48949	0.0869785
296	M8	17	64.2686	1.48478	0.0877633
296	M8	18	64.5257	1.47673	0.0889074
296	M8	19	64.7829	1.46709	0.0899986
296	M8	20	65.0401	1.45247	0.090671
296	M8	21	65.2973	1.44274	0.0907947
296	M8	22	65.5545	1.43281	0.0905038
296	M8	23	65.8117	1.4252	0.0900697
296	M8	24	66.0689	1.41814	0.0897088
296	M8	25	66.3261	1.40582	0.0894755
296	M8	26	66.5833	1.3961	0.0892959
296	M8	27	66.8405	1.38677	0.0890866
296	M8	28	67.0977	1.37589	0.0888609
296	M8	29	67.3549	1.36673	0.0887311
296	M8	30	67.612	1.35931	0.0888272
296	M8	31	67.8692	1.34859	0.0891929
296	M8	32	68.1264	1.34101	0.0897143
296	M8	33	68.3836	1.3269	0.0901354
296	M8	34	68.6408	1.32181	0.0901527
296	M8	35	68.898	1.31297	0.0895724
296	M8	36	69.1552	1.29386	0.0884499
296	M8	37	69.4124	1.28943	0.0871312
296	M8	38	69.6696	1.27992	0.0861365
296	M8	39	69.9268	1.27481	0.0859155
296	M8	40	70.184	1.26472	0.0866233
296	M8	41	70.4411	1.25825	0.088039
296	M8	42	70.6983	1.24433	0.0896731
296	M8	43	70.9555	1.2349	0.0909895
296	M8	44	71.2127	1.22629	0.0916108
296	M8	45	71.4699	1.21301	0.0914176
296	M8	46	71.7271	1.20416	0.0905287
296	M8	47	71.9843	1.19369	0.0891985
296	M8	48	72.2415	1.18766	0.0877125
296	M8	49	72.4987	1.17483	0.0863231
296	M8	50	72.7559	1.16765	0.0852389
296	M8	51	73.0131	1.15765	0.0846377
296	M8	52	73.2702	1.14919	0.0846595
296	M8	53	73.5274	1.14229	0.0853635
296	M8	54	73.7846	1.13237	0.0866717
296	M8	55	74.0418	1.12371	0.0883595
296	M8	56	74.299	1.11469	0.0901183
296	M8	57	74.5562	1.10176	0.091694
296	M8	58	74.8134	1.09373	0.0930417
296	M8	59	75.0706	1.08103	0.0944379
296	M8	60	75.3278	1.07147	0.0965008
296	M8	61	75.585	1.06523	0.100117
296	M8	62	75.8422	1.052	0.106309
296	M8	63	76.0993	1.04186	0.116091
296	M8	64	76.3565	1.03712	0.130383
296	M8	65	76.6137	1.02002	0.150001
296	M8	66	76.8709	1.00252	0.175705
296	M8	67	77.1281	0.987785	0.208207
296	M8	68	77.3853	0.964767	0.248054
296	M8	69	77.6425	0.939736	0.295339
296	M8	70	77.8997	0.909111	0.349333
296	M8	71	78.1569	0.868847	0.408166
296	M8	72	78.4141	0.8192	0.468762
296	M8	73	78.6713	0.764517	0.527084
296	M8	74	78.9285	0.688845	0.578643
296	M8	75	79.1856	0.617581	0.619107
296	M8	76	79.4428	0.536936	0.644828
296	M8	77	79.7	0.459438	0.65318
296	M8	78	79.9572	0.379041	0.642758
296	M8	79	80.2144	0.300694	0.61354
296	M8	80	80.4716	0.228747	0.567037
296	M8	81	80.7288	0.165569	0.506356
296	M8	82	80.986	0.116565	0.436005
296	M8	83	81.2432	0.0792771	0.361372
296	M8	84	81.5004	0.0537616	0.28793
296	M8	85	81.7576	0.03751	0.220397
296	M8	86	82.0147	0.0277381	0.162098
296	M8	87	82.2719	0.0220078	0.114683
296	M8	88	82.5291	0.018988	0.0782428
296	M8	89	82.7863	0.0169018	0.0516995
296	M8	90	83.0435	0.0158409	0.0333139
296	M8	91	83.3007	0.0151105	0.0211556
296	M8	92	83.5579	0.0148856	0.0134422
296	M8	93	83.8151	0.0141509	0.00872075
296	M8	94	84.0723	0.0134606	0.00591714
296	M8	95	84.3295	0.0139286	0.00429757
296	M8	96	84.5867	0.0134824	0.00338903
296	M8	97	84.8438	0.0130715	0.0028946
296	M8	98	85.101	0.0127142	0.00262557
296	M8	99	85.3582	0.0128795	0.00245867
296	M8	100	85.6154	0.0124333	0.00231616
296	M8	101	85.8726	0.0118817	0.00215942
296	M8	102	86.1298	0.0114947	0.00198449
296	M8	103	86.387	0.0116408	0.0018106
296	M8	104	86.6442	0.0117918	0.00166218
296	M8	105	86.9014	0.0115602	0.00155259
296	M8	106	87.1586	0.0109192	0.00147905
296	M8	107	87.4158	0.0109885	0.00142954
296	M8	108	87.673	0.0108348	0.00139324
296	M8	109	87.9301	0.0107877	0.00136527
296	M8	110	88.1873	0.0104853	0.00134309
296	M8	111	88.4445	0.0104285	0.00132003
296	M8	112	88.7017	0.0104383	0.00128361
296	M8	113	88.9589	0.0100585	0.00122202
296	M8	114	89.2161	0.00976038	0.00113525
296	M8	115	89.4733	0.00975055	0.00104199
296	M8	116	89.7305	0.0099765	0.000974171
296	M8	117	89.9877	0.00993154	0.000959379
296	M8	118	90.2449	0.00985987	0.00100179
296	M8	119	90.5021	0.00950611	0.00107589
296	M8	120	90.7592	0.00940532	0.00113924
296	M8	121	91.0164	0.00902058	0.00115667
296	M8	122	91.2736	0.00894214	0.00111952
296	M8	123	91.5308	0.00899389	0.00104752
296	M8	124	91.788	0.00917193	0.000973931
296	M8	125	92.0452	0.00891502	0.000926267
296	M8	126	92.3024	0.00849473	0.000916007
296	M8	127	92.5596	0.00894244	0.000940995
296	M8	128	92.8168	0.00820978	0.000993579
296	M8	129	93.074	0.00876444	0.0010646
296	M8	130	93.3312	0.0082956	0.00113996
296	M8	131	93.5883	0.00815357	0.00119578
296	M8	132	93.8455	0.00822744	0.00120063
296	M8	133	94.1027	0.0074645	0.00112777
296	M8	134	94.3599	0.00758265	0.000970666
296	M8	135	94.6171	0.00759339	0.00075067
296	M8	136	94.8743	0.00768182	0.000510106
297	M9	1	60.1535	1.58876	0.0866337
297	M9	2	60.4107	1.58134	0.0874399
297	M9	3	60.6679	1.56873	0.0882584
297	M9	4	60.9251	1.56275	0.0889098
297	M9	5	61.1823	1.55527	0.0892614
297	M9	6	61.4395	1.54203	0.0892579
297	M9	7	61.6966	1.53062	0.0889383
297	M9	8	61.9538	1.52748	0.0884208
297	M9	9	62.211	1.50889	0.0878521
297	M9	10	62.4682	1.50853	0.0873463
297	M9	11	62.7254	1.49625	0.0869472
297	M9	12	62.9826	1.4872	0.0866447
297	M9	13	63.2398	1.47514	0.0864274
297	M9	14	63.497	1.4689	0.0863168
297	M9	15	63.7542	1.45859	0.0863506
297	M9	16	64.0114	1.45061	0.0865293
297	M9	17	64.2686	1.44263	0.0867881
297	M9	18	64.5257	1.43017	0.0870165
297	M9	19	64.7829	1.42264	0.0871201
297	M9	20	65.0401	1.41155	0.0870783
297	M9	21	65.2973	1.40488	0.0869539
297	M9	22	65.5545	1.39368	0.0868579
297	M9	23	65.8117	1.38379	0.0868915
297	M9	24	66.0689	1.37698	0.0870903
297	M9	25	66.3261	1.36868	0.0874086
297	M9	26	66.5833	1.35545	0.0877462
297	M9	27	66.8405	1.34887	0.0880104
297	M9	28	67.0977	1.33663	0.0881726
297	M9	29	67.3549	1.32997	0.088291
297	M9	30	67.612	1.31822	0.0884753
297	M9	31	67.8692	1.30915	0.0888198
297	M9	32	68.1264	1.30049	0.0893315
297	M9	33	68.3836	1.29435	0.0899045
297	M9	34	68.6408	1.27963	0.0903477
297	M9	35	68.898	1.26998	0.0904625
297	M9	36	69.1552	1.26081	0.0901177
297	M9	37	69.4124	1.25493	0.0893046
297	M9	38	69.6696	1.23879	0.0881536
297	M9	39	69.9268	1.23176	0.0869208
297	M9	40	70.184	1.22394	0.0859267
297	M9	41	70.4411	1.21392	0.0854565
297	M9	42	70.6983	1.2084	0.0856401
297	M9	43	70.9555	1.19618	0.086369
297	M9	44	71.2127	1.18816	0.0873041
297	M9	45	71.4699	1.18269	0.0879867
297	M9	46	71.7271	1.16524	0.0880315
297	M9	47	71.9843	1.15801	0.087314
297	M9	48	72.2415	1.14735	0.0860492
297	M9	49	72.4987	1.1369	0.0847088
297	M9	50	72.7559	1.13282	0.0838067
297	M9	51	73.0131	1.12654	0.083674
297	M9	52	73.2702	1.11164	0.0843263
297	M9	53	73.5274	1.10661	0.0854956
297	M9	54	73.7846	1.09734	0.0867841
297	M9	55	74.0418	1.08937	0.0878766
297	M9	56	74.299	1.07238	0.0886996
297	M9	57	74.5562	1.06491	0.0894625
297	M9	58	74.8134	1.05842	0.0905567
297	M9	59	75.0706	1.05281	0.0924044
297	M9	60	75.3278	1.03794	0.0953775
297	M9	61	75.585	1.02959	0.0998643
297	M9	62	75.8422	1.01765	0.106424
297	M9	63	76.0993	1.007	0.115899
297	M9	64	76.3565	0.996732	0.129385
297	M9	65	76.6137	0.986772	0.148072
297	M9	66	76.8709	0.972155	0.173045
297	M9	67	77.1281	0.952489	0.205115
297	M9	68	77.3853	0.932283	0.244664
297	M9	69	77.6425	0.906746	0.291464
297	M9	70	77.8997	0.877318	0.344464
297	M9	71	78.1569	0.835542	0.401653
297	M9	72	78.4141	0.789481	0.460079
297	M9	73	78.6713	0.726377	0.516087
297	M9	74	78.9285	0.664076	0.565689
297	M9	75	79.1856	0.592167	0.604971
297	M9	76	79.4428	0.51588	0.630436
297	M9	77	79.7	0.437667	0.639318
297	M9	78	79.9572	0.357617	0.629909
297	M9	79	80.2144	0.282898	0.601885
297	M9	80	80.4716	0.210302	0.556583
297	M9	81	80.7288	0.150272	0.497067
297	M9	82	80.986	0.101128	0.427878
297	M9	83	81.2432	0.0647647	0.354435
297	M9	84	81.5004	0.0407707	0.2822
297	M9	85	81.7576	0.0244191	0.215838
297	M9	86	82.0147	0.0151056	0.158603
297	M9	87	82.2719	0.0092211	0.112091
297	M9	88	82.5291	0.00612713	0.0763729
297	M9	89	82.7863	0.00481603	0.0503894
297	M9	90	83.0435	0.00330374	0.0324461
297	M9	91	83.3007	0.00296259	0.0206617
297	M9	92	83.5579	0.0025159	0.0132865
297	M9	93	83.8151	0.00169766	0.00887324
297	M9	94	84.0723	0.00178666	0.00632657
297	M9	95	84.3295	0.00126622	0.00487954
297	M9	96	84.5867	0.000918453	0.00403675
297	M9	97	84.8438	-0.000377341	0.0035097
297	M9	98	85.101	2.00066e-05	0.00315235
297	M9	99	85.3582	0.000507294	0.00290125
297	M9	100	85.6154	-0.000664331	0.00272628
297	M9	101	85.8726	-0.00117559	0.00259944
297	M9	102	86.1298	-0.000491754	0.00248466
297	M9	103	86.387	-0.00117473	0.0023449
297	M9	104	86.6442	-0.00182459	0.00215827
297	M9	105	86.9014	-0.0018106	0.00193272
297	M9	106	87.1586	-0.00240555	0.00170851
297	M9	107	87.4158	-0.00161616	0.00154293
297	M9	108	87.673	-0.00240069	0.00148176
297	M9	109	87.9301	-0.00198655	0.00153238
297	M9	110	88.1873	-0.00243082	0.00165532
297	M9	111	88.4445	-0.00278367	0.00178081
297	M9	112	88.7017	-0.00329267	0.00184277
297	M9	113	88.9589	-0.00336568	0.00181217
297	M9	114	89.2161	-0.00361417	0.00171122
297	M9	115	89.4733	-0.00372185	0.00159948
297	M9	116	89.7305	-0.00341342	0.00153865
297	M9	117	89.9877	-0.00329371	0.00155609
297	M9	118	90.2449	-0.00413416	0.0016296
297	M9	119	90.5021	-0.00425475	0.00170341
297	M9	120	90.7592	-0.00469943	0.00172482
297	M9	121	91.0164	-0.00498752	0.00167662
297	M9	122	91.2736	-0.0044967	0.00158476
297	M9	123	91.5308	-0.00495965	0.00149957
297	M9	124	91.788	-0.00485844	0.00146683
297	M9	125	92.0452	-0.00509878	0.0015081
297	M9	126	92.3024	-0.00565682	0.00161741
297	M9	127	92.5596	-0.00523971	0.00176836
297	M9	128	92.8168	-0.00559837	0.00192228
297	M9	129	93.074	-0.00609012	0.0020346
297	M9	130	93.3312	-0.00643567	0.00206228
297	M9	131	93.5883	-0.00685905	0.00197426
297	M9	132	93.8455	-0.00630776	0.00176233
297	M9	133	94.1027	-0.00744466	0.00144696
297	M9	134	94.3599	-0.0071837	0.00107453
297	M9	135	94.6171	-0.00701517	0.000705069
297	M9	136	94.8743	-0.00667102	0.000393774
298	M10	1	60.1535	1.65472	0.087477
298	M10	2	60.4107	1.64505	0.0868741
298	M10	3	60.6679	1.63652	0.0861295
298	M10	4	60.9251	1.63124	0.0854874
298	M10	5	61.1823	1.62052	0.0852094
298	M10	6	61.4395	1.61375	0.0854639
298	M10	7	61.6966	1.60648	0.0862574
298	M10	8	61.9538	1.59387	0.0874491
298	M10	9	62.211	1.58572	0.0888361
298	M10	10	62.4682	1.5783	0.0902207
298	M10	11	62.7254	1.56705	0.0914432
298	M10	12	62.9826	1.55569	0.0923675
298	M10	13	63.2398	1.54945	0.092861
298	M10	14	63.497	1.53635	0.09281
298	M10	15	63.7542	1.52954	0.0921829
298	M10	16	64.0114	1.517	0.0911148
298	M10	17	64.2686	1.5042	0.0899267
298	M10	18	64.5257	1.49935	0.0890227
298	M10	19	64.7829	1.48892	0.0886949
298	M10	20	65.0401	1.48779	0.0889591
298	M10	21	65.2973	1.47083	0.0895481
298	M10	22	65.5545	1.46361	0.0900724
298	M10	23	65.8117	1.44867	0.0902495
298	M10	24	66.0689	1.44742	0.0900501
298	M10	25	66.3261	1.43172	0.0896893
298	M10	26	66.5833	1.42001	0.0894738
298	M10	27	66.8405	1.42067	0.0896212
298	M10	28	67.0977	1.40615	0.0901413
298	M10	29	67.3549	1.39675	0.0908488
298	M10	30	67.612	1.38783	0.0914737
298	M10	31	67.8692	1.37476	0.0917979
298	M10	32	68.1264	1.36755	0.0917332
298	M10	33	68.3836	1.35829	0.0913237
298	M10	34	68.6408	1.34762	0.0906969
298	M10	35	68.898	1.33738	0.0900061
298	M10	36	69.1552	1.32918	0.089382
298	M10	37	69.4124	1.31859	0.0888964
298	M10	38	69.6696	1.31537	0.0885514
298	M10	39	69.9268	1.29829	0.0883058
298	M10	40	70.184	1.29377	0.0881333
298	M10	41	70.4411	1.28088	0.0880597
298	M10	42	70.6983	1.27516	0.0881471
298	M10	43	70.9555	1.26514	0.0884265
298	M10	44	71.2127	1.2559	0.0888378
298	M10	45	71.4699	1.24747	0.0892177
298	M10	46	71.7271	1.23618	0.0893601
298	M10	47	71.9843	1.22641	0.0891076
298	M10	48	72.2415	1.21763	0.0884266
298	M10	49	72.4987	1.20754	0.087432
298	M10	50	72.7559	1.19911	0.0863601
298	M10	51	73.0131	1.18726	0.0854972
298	M10	52	73.2702	1.18614	0.0850903
298	M10	53	73.5274	1.16974	0.0852718
298	M10	54	73.7846	1.16678	0.0860321
298	M10	55	74.0418	1.15593	0.087247
298	M10	56	74.299	1.14638	0.0887619
298	M10	57	74.5562	1.13759	0.0904892
298	M10	58	74.8134	1.12478	0.0924849
298	M10	59	75.0706	1.11908	0.0949835
298	M10	60	75.3278	1.10826	0.0983921
298	M10	61	75.585	1.09803	0.103291
298	M10	62	75.8422	1.08748	0.110447
298	M10	63	76.0993	1.07734	0.12081
298	M10	64	76.3565	1.06215	0.135461
298	M10	65	76.6137	1.05711	0.155502
298	M10	66	76.8709	1.03889	0.181914
298	M10	67	77.1281	1.02033	0.215442
298	M10	68	77.3853	0.996787	0.256463
298	M10	69	77.6425	0.972412	0.304824
298	M10	70	77.8997	0.940921	0.359596
298	M10	71	78.1569	0.898262	0.418844
298	M10	72	78.4141	0.852084	0.479555
298	M10	73	78.6713	0.794244	0.537819
298	M10	74	78.9285	0.720472	0.589268
298	M10	75	79.1856	0.649431	0.629612
298	M10	76	79.4428	0.57238	0.655131
298	M10	77	79.7	0.493283	0.663049
298	M10	78	79.9572	0.411925	0.651814
298	M10	79	80.2144	0.334381	0.621352
298	M10	80	80.4716	0.264113	0.573256
298	M10	81	80.7288	0.202976	0.510812
298	M10	82	80.986	0.153754	0.438734
298	M10	83	81.2432	0.117684	0.362571
298	M10	84	81.5004	0.0927894	0.287891
298	M10	85	81.7576	0.0772492	0.219457
298	M10	86	82.0147	0.0679039	0.160595
298	M10	87	82.2719	0.0633326	0.112923
298	M10	88	82.5291	0.0600885	0.0764686
298	M10	89	82.7863	0.0581763	0.0500659
298	M10	90	83.0435	0.0576056	0.0318844
298	M10	91	83.3007	0.0564952	0.0199197
298	M10	92	83.5579	0.0565868	0.0123472
298	M10	93	83.8151	0.0558995	0.00770623
298	M10	94	84.0723	0.0554882	0.00494102
298	M10	95	84.3295	0.0554243	0.00334513
298	M10	96	84.5867	0.0557618	0.00246291
298	M10	97	84.8438	0.0556984	0.00199253
298	M10	98	85.101	0.0551954	0.00172086
298	M10	99	85.3582	0.0549425	0.0014995
298	M10	100	85.6154	0.0544295	0.0012476
298	M10	101	85.8726	0.054624	0.000955665
298	M10	102	86.1298	0.0540749	0.000669594
298	M10	103	86.387	0.0547623	0.000453921
298	M10	104	86.6442	0.0552318	0.000351101
298	M10	105	86.9014	0.0546546	0.000357983
298	M10	106	87.1586	0.0544277	0.000429308
298	M10	107	87.4158	0.0547916	0.00050078
298	M10	108	87.673	0.0538494	0.000515875
298	M10	109	87.9301	0.0548852	0.000444571
298	M10	110	88.1873	0.0536653	0.000290792
298	M10	111	88.4445	0.0543841	9.0565e-05
298	M10	112	88.7017	0.0541569	-9.88438e-05
298	M10	113	88.9589	0.0544093	-0.000219283
298	M10	114	89.2161	0.0549674	-0.000237229
298	M10	115	89.4733	0.0545682	-0.000161424
298	M10	116	89.7305	0.0546377	-3.9588e-05
298	M10	117	89.9877	0.0541489	6.76711e-05
298	M10	118	90.2449	0.0543151	0.000121207
298	M10	119	90.5021	0.054001	0.00012355
298	M10	120	90.7592	0.0548132	0.00011198
298	M10	121	91.0164	0.0544054	0.000130924
298	M10	122	91.2736	0.0547343	0.000204161
298	M10	123	91.5308	0.05406	0.00032464
298	M10	124	91.788	0.0543668	0.000464169
298	M10	125	92.0452	0.0542414	0.000591674
298	M10	126	92.3024	0.0540757	0.000686304
298	M10	127	92.5596	0.0542869	0.000741203
298	M10	128	92.8168	0.0534426	0.000760545
298	M10	129	93.074	0.0537735	0.000754418
298	M10	130	93.3312	0.0546659	0.00073406
298	M10	131	93.5883	0.0529767	0.000708301
298	M10	132	93.8455	0.0534975	0.000681043
298	M10	133	94.1027	0.0538316	0.000649596
298	M10	134	94.3599	0.0539426	0.000604273
298	M10	135	94.6171	0.0531698	0.000531986
298	M10	136	94.8743	0.052767	0.000425129
299	M11	1	60.1535	1.58464	0.085779
299	M11	2	60.4107	1.57728	0.0856021
299	M11	3	60.6679	1.56841	0.0853161
299	M11	4	60.9251	1.56242	0.0850325
299	M11	5	61.1823	1.54909	0.0849445
299	M11	6	61.4395	1.54331	0.0852367
299	M11	7	61.6966	1.5373	0.0859829
299	M11	8	61.9538	1.52416	0.0870734
299	M11	9	62.211	1.51609	0.0882347
299	M11	10	62.4682	1.50809	0.0891352
299	M11	11	62.7254	1.49821	0.0895193
299	M11	12	62.9826	1.48371	0.089311
299	M11	13	63.2398	1.47528	0.0886195
299	M11	14	63.497	1.46854	0.0876428
299	M11	15	63.7542	1.45986	0.086555
299	M11	16	64.0114	1.45076	0.0854467
299	M11	17	64.2686	1.43891	0.0843721
299	M11	18	64.5257	1.42969	0.0834336
299	M11	19	64.7829	1.42451	0.082819
299	M11	20	65.0401	1.41334	0.082743
299	M11	21	65.2973	1.40569	0.0833261
299	M11	22	65.5545	1.40101	0.0844883
299	M11	23	65.8117	1.38709	0.0859293
299	M11	24	66.0689	1.38144	0.0872211
299	M11	25	66.3261	1.36955	0.0879739
299	M11	26	66.5833	1.35955	0.0880073
299	M11	27	66.8405	1.34916	0.0874353
299	M11	28	67.0977	1.33641	0.0866052
299	M11	29	67.3549	1.33313	0.0859189
299	M11	30	67.612	1.32521	0.0856342
299	M11	31	67.8692	1.31589	0.08578
299	M11	32	68.1264	1.30254	0.0862156
299	M11	33	68.3836	1.2959	0.0867666
299	M11	34	68.6408	1.285	0.0873174
299	M11	35	68.898	1.27805	0.0878101
299	M11	36	69.1552	1.26839	0.0881845
299	M11	37	69.4124	1.25953	0.0883524
299	M11	38	69.6696	1.247	0.0882299
299	M11	39	69.9268	1.23838	0.0877997
299	M11	40	70.184	1.22931	0.0871311
299	M11	41	70.4411	1.22167	0.0863586
299	M11	42	70.6983	1.21231	0.0856286
299	M11	43	70.9555	1.19969	0.0850591
299	M11	44	71.2127	1.19533	0.0847182
299	M11	45	71.4699	1.18455	0.0846073
299	M11	46	71.7271	1.17569	0.0846605
299	M11	47	71.9843	1.16883	0.084775
299	M11	48	72.2415	1.15608	0.0848631
299	M11	49	72.4987	1.14766	0.0848928
299	M11	50	72.7559	1.13868	0.0848804
299	M11	51	73.0131	1.13159	0.0848355
299	M11	52	73.2702	1.12353	0.0847224
299	M11	53	73.5274	1.11108	0.0844778
299	M11	54	73.7846	1.10407	0.0840899
299	M11	55	74.0418	1.09046	0.0836689
299	M11	56	74.299	1.08871	0.0834586
299	M11	57	74.5562	1.07643	0.0837831
299	M11	58	74.8134	1.069	0.084979
299	M11	59	75.0706	1.06	0.0873607
299	M11	60	75.3278	1.05055	0.0912318
299	M11	61	75.585	1.04342	0.0969244
299	M11	62	75.8422	1.03296	0.10486
299	M11	63	76.0993	1.02118	0.115614
299	M11	64	76.3565	1.00846	0.129977
299	M11	65	76.6137	0.998582	0.148947
299	M11	66	76.8709	0.981787	0.173639
299	M11	67	77.1281	0.964781	0.205084
299	M11	68	77.3853	0.94542	0.243932
299	M11	69	77.6425	0.922483	0.290136
299	M11	70	77.8997	0.886778	0.3427
299	M11	71	78.1569	0.849983	0.399567
299	M11	72	78.4141	0.805144	0.457706
299	M11	73	78.6713	0.740432	0.5134
299	M11	74	78.9285	0.679622	0.562645
299	M11	75	79.1856	0.607907	0.601549
299	M11	76	79.4428	0.532446	0.626672
299	M11	77	79.7	0.456417	0.635318
299	M11	78	79.9572	0.376937	0.625822
299	M11	79	80.2144	0.302237	0.597863
299	M11	80	80.4716	0.231964	0.552746
299	M11	81	80.7288	0.171516	0.493488
299	M11	82	80.986	0.123101	0.424594
299	M11	83	81.2432	0.087696	0.351466
299	M11	84	81.5004	0.0637696	0.279572
299	M11	85	81.7576	0.0481354	0.213585
299	M11	86	82.0147	0.0388458	0.156761
299	M11	87	82.2719	0.0332308	0.11068
299	M11	88	82.5291	0.0303648	0.0753786
299	M11	89	82.7863	0.029123	0.0497579
299	M11	90	83.0435	0.0273037	0.0320884
299	M11	91	83.3007	0.0267811	0.0204734
299	M11	92	83.5579	0.0266426	0.0131747
299	M11	93	83.8151	0.0258386	0.00877806
299	M11	94	84.0723	0.0255866	0.00622857
299	M11	95	84.3295	0.0252725	0.00478647
299	M11	96	84.5867	0.0254548	0.00395678
299	M11	97	84.8438	0.0241203	0.00342508
299	M11	98	85.101	0.024004	0.00300958
299	M11	99	85.3582	0.0236901	0.00262392
299	M11	100	85.6154	0.0238113	0.00224295
299	M11	101	85.8726	0.0233734	0.00187174
299	M11	102	86.1298	0.0233981	0.00152379
299	M11	103	86.387	0.0230056	0.00121223
299	M11	104	86.6442	0.0230536	0.000950357
299	M11	105	86.9014	0.0229722	0.000752937
299	M11	106	87.1586	0.02321	0.00063301
299	M11	107	87.4158	0.0227604	0.00059459
299	M11	108	87.673	0.0230583	0.000626436
299	M11	109	87.9301	0.0231717	0.000702027
299	M11	110	88.1873	0.0226489	0.000788128
299	M11	111	88.4445	0.0222966	0.000858471
299	M11	112	88.7017	0.0223555	0.000904335
299	M11	113	88.9589	0.0230578	0.000934133
299	M11	114	89.2161	0.0217906	0.000961657
299	M11	115	89.4733	0.0224822	0.000991043
299	M11	116	89.7305	0.0223444	0.00100979
299	M11	117	89.9877	0.0216316	0.000995141
299	M11	118	90.2449	0.0220017	0.000929457
299	M11	119	90.5021	0.0213841	0.00081417
299	M11	120	90.7592	0.0217421	0.000672768
299	M11	121	91.0164	0.0218514	0.000540167
299	M11	122	91.2736	0.0217574	0.000445696
299	M11	123	91.5308	0.0215666	0.000400446
299	M11	124	91.788	0.0215592	0.000396572
299	M11	125	92.0452	0.0218884	0.000417334
299	M11	126	92.3024	0.0210493	0.000449904
299	M11	127	92.5596	0.0215423	0.000492423
299	M11	128	92.8168	0.0215319	0.000551718
299	M11	129	93.074	0.0215267	0.000634292
299	M11	130	93.3312	0.0210859	0.000736771
299	M11	131	93.5883	0.0210875	0.000841105
299	M11	132	93.8455	0.0213121	0.000916754
299	M11	133	94.1027	0.0210595	0.000930034
299	M11	134	94.3599	0.0202263	0.00085835
299	M11	135	94.6171	0.0205845	0.000703502
299	M11	136	94.8743	0.0205841	0.000495449
300	M12	1	60.1535	1.64469	0.0873337
300	M12	2	60.4107	1.63823	0.0876108
300	M12	3	60.6679	1.63268	0.0877612
300	M12	4	60.9251	1.61568	0.0877004
300	M12	5	61.1823	1.61408	0.0874322
300	M12	6	61.4395	1.60035	0.0870635
300	M12	7	61.6966	1.59514	0.0867872
300	M12	8	61.9538	1.58092	0.0868191
300	M12	9	62.211	1.57067	0.0872968
300	M12	10	62.4682	1.57016	0.0881822
300	M12	11	62.7254	1.55974	0.0892369
300	M12	12	62.9826	1.54595	0.0901244
300	M12	13	63.2398	1.53201	0.090584
300	M12	14	63.497	1.52631	0.0905636
300	M12	15	63.7542	1.51938	0.0902176
300	M12	16	64.0114	1.5042	0.0898032
300	M12	17	64.2686	1.4997	0.0895441
300	M12	18	64.5257	1.48675	0.089557
300	M12	19	64.7829	1.48041	0.0898428
300	M12	20	65.0401	1.47015	0.0903271
300	M12	21	65.2973	1.45937	0.0909159
300	M12	22	65.5545	1.45077	0.0915362
300	M12	23	65.8117	1.43877	0.0921372
300	M12	24	66.0689	1.43011	0.092666
300	M12	25	66.3261	1.42404	0.0930446
300	M12	26	66.5833	1.41032	0.0931941
300	M12	27	66.8405	1.39626	0.0930786
300	M12	28	67.0977	1.39098	0.0927411
300	M12	29	67.3549	1.38247	0.0922853
300	M12	30	67.612	1.36703	0.0918149
300	M12	31	67.8692	1.36222	0.0913819
300	M12	32	68.1264	1.35154	0.0909818
300	M12	33	68.3836	1.34079	0.0905959
300	M12	34	68.6408	1.32972	0.0902321
300	M12	35	68.898	1.32275	0.089934
300	M12	36	69.1552	1.31156	0.0897501
300	M12	37	69.4124	1.30401	0.0896742
300	M12	38	69.6696	1.29424	0.0896235
300	M12	39	69.9268	1.28255	0.0894617
300	M12	40	70.184	1.27477	0.0890623
300	M12	41	70.4411	1.2642	0.0883828
300	M12	42	70.6983	1.25522	0.0874984
300	M12	43	70.9555	1.24236	0.0865842
300	M12	44	71.2127	1.23939	0.0858479
300	M12	45	71.4699	1.22643	0.0854515
300	M12	46	71.7271	1.21986	0.085456
300	M12	47	71.9843	1.21004	0.0858297
300	M12	48	72.2415	1.20054	0.0864812
300	M12	49	72.4987	1.18925	0.0873068
300	M12	50	72.7559	1.18427	0.0882051
300	M12	51	73.0131	1.17273	0.0890813
300	M12	52	73.2702	1.16155	0.0898564
300	M12	53	73.5274	1.15402	0.0904829
300	M12	54	73.7846	1.14097	0.09096
300	M12	55	74.0418	1.1363	0.0913327
300	M12	56	74.299	1.12203	0.0916845
300	M12	57	74.5562	1.11505	0.0921465
300	M12	58	74.8134	1.10339	0.0929318
300	M12	59	75.0706	1.09391	0.0943773
300	M12	60	75.3278	1.08561	0.0969622
300	M12	61	75.585	1.07297	0.101307
300	M12	62	75.8422	1.06739	0.10815
300	M12	63	76.0993	1.05467	0.118347
300	M12	64	76.3565	1.04138	0.132868
300	M12	65	76.6137	1.03149	0.152772
300	M12	66	76.8709	1.01325	0.179112
300	M12	67	77.1281	0.999729	0.212753
300	M12	68	77.3853	0.978374	0.254135
300	M12	69	77.6425	0.946355	0.303006
300	M12	70	77.8997	0.918594	0.358213
300	M12	71	78.1569	0.874123	0.417588
300	M12	72	78.4141	0.828375	0.478009
300	M12	73	78.6713	0.76178	0.53565
300	M12	74	78.9285	0.696011	0.58637
300	M12	75	79.1856	0.621123	0.626147
300	M12	76	79.4428	0.543213	0.651459
300	M12	77	79.7	0.463419	0.659588
300	M12	78	79.9572	0.37996	0.648925
300	M12	79	80.2144	0.303149	0.619263
300	M12	80	80.4716	0.229827	0.572055
300	M12	81	80.7288	0.167539	0.51047
300	M12	82	80.986	0.118292	0.439148
300	M12	83	81.2432	0.080105	0.363601
300	M12	84	81.5004	0.0551689	0.289395
300	M12	85	81.7576	0.0388923	0.221297
300	M12	86	82.0147	0.0296507	0.16264
300	M12	87	82.2719	0.0235205	0.115046
300	M12	88	82.5291	0.020794	0.0785479
300	M12	89	82.7863	0.0189286	0.0520008
300	M12	90	83.0435	0.0171463	0.0336273
300	M12	91	83.3007	0.0158183	0.0215053
300	M12	92	83.5579	0.0160588	0.013894
300	M12	93	83.8151	0.0163563	0.00937426
300	M12	94	84.0723	0.0159247	0.00685276
300	M12	95	84.3295	0.0149382	0.00551413
300	M12	96	84.5867	0.0144301	0.00477632
300	M12	97	84.8438	0.0135232	0.00426472
300	M12	98	85.101	0.0134321	0.00378877
300	M12	99	85.3582	0.012635	0.0033027
300	M12	100	85.6154	0.0128813	0.00284831
300	M12	101	85.8726	0.0123598	0.00249254
300	M12	102	86.1298	0.012902	0.0022775
300	M12	103	86.387	0.0122049	0.00219549
300	M12	104	86.6442	0.0124814	0.0021929
300	M12	105	86.9014	0.0114051	0.00219655
300	M12	106	87.1586	0.0115485	0.00214799
300	M12	107	87.4158	0.0103547	0.00202779
300	M12	108	87.673	0.0110169	0.00185716
300	M12	109	87.9301	0.0113052	0.00167795
300	M12	110	88.1873	0.0106846	0.00152561
300	M12	111	88.4445	0.0101159	0.00141277
300	M12	112	88.7017	0.0105508	0.00133068
300	M12	113	88.9589	0.0103562	0.00126154
300	M12	114	89.2161	0.00998246	0.00119001
300	M12	115	89.4733	0.0100825	0.0011085
300	M12	116	89.7305	0.00998284	0.00101856
300	M12	117	89.9877	0.00935258	0.000931435
300	M12	118	90.2449	0.0101474	0.000866474
300	M12	119	90.5021	0.00957957	0.000844277
300	M12	120	90.7592	0.00950433	0.000875344
300	M12	121	91.0164	0.00997323	0.000951142
300	M12	122	91.2736	0.00937368	0.0010454
300	M12	123	91.5308	0.00898869	0.00112717
300	M12	124	91.788	0.0089545	0.00117735
300	M12	125	92.0452	0.00887038	0.00119638
300	M12	126	92.3024	0.00920793	0.00119707
300	M12	127	92.5596	0.00876091	0.00118981
300	M12	128	92.8168	0.00841214	0.00117359
300	M12	129	93.074	0.00844779	0.00113979
300	M12	130	93.3312	0.00801167	0.00108282
300	M12	131	93.5883	0.00861357	0.00100535
300	M12	132	93.8455	0.00788645	0.000913662
300	M12	133	94.1027	0.00848512	0.000809684
300	M12	134	94.3599	0.00748886	0.000689559
300	M12	135	94.6171	0.00797271	0.000550756
300	M12	136	94.8743	0.0078119	0.000400225
313	N1	1	60.1535	1.47661	0.0902442
313	N1	2	60.4107	1.46856	0.0897718
313	N1	3	60.6679	1.46312	0.0892407
313	N1	4	60.9251	1.45606	0.0887665
313	N1	5	61.1823	1.44554	0.0884797
313	N1	6	61.4395	1.43591	0.08849
313	N1	7	61.6966	1.42779	0.0888661
313	N1	8	61.9538	1.42293	0.0896043
313	N1	9	62.211	1.40794	0.090623
313	N1	10	62.4682	1.40364	0.0917791
313	N1	11	62.7254	1.39333	0.0929087
313	N1	12	62.9826	1.38256	0.0938839
313	N1	13	63.2398	1.37228	0.0946357
313	N1	14	63.497	1.36352	0.0951534
313	N1	15	63.7542	1.35796	0.0954675
313	N1	16	64.0114	1.34358	0.0956236
313	N1	17	64.2686	1.33102	0.0956613
313	N1	18	64.5257	1.32895	0.0955837
313	N1	19	64.7829	1.3181	0.0953438
313	N1	20	65.0401	1.3053	0.0948588
313	N1	21	65.2973	1.29687	0.0940691
313	N1	22	65.5545	1.28544	0.092991
313	N1	23	65.8117	1.28021	0.0917405
313	N1	24	66.0689	1.2698	0.090515
313	N1	25	66.3261	1.25855	0.0895394
313	N1	26	66.5833	1.2507	0.0890071
313	N1	27	66.8405	1.24395	0.0890092
313	N1	28	67.0977	1.23687	0.0894931
313	N1	29	67.3549	1.22407	0.0902776
313	N1	30	67.612	1.21716	0.0911242
313	N1	31	67.8692	1.20569	0.0918301
313	N1	32	68.1264	1.19823	0.0922862
313	N1	33	68.3836	1.18758	0.0924733
313	N1	34	68.6408	1.17904	0.0924241
313	N1	35	68.898	1.16909	0.0921887
313	N1	36	69.1552	1.16204	0.0918274
313	N1	37	69.4124	1.14939	0.0914207
313	N1	38	69.6696	1.14211	0.0910564
313	N1	39	69.9268	1.13262	0.090785
313	N1	40	70.184	1.12488	0.0905715
313	N1	41	70.4411	1.11848	0.0902956
313	N1	42	70.6983	1.10432	0.08983
313	N1	43	70.9555	1.09435	0.0891458
313	N1	44	71.2127	1.08865	0.0883616
313	N1	45	71.4699	1.07916	0.0876933
313	N1	46	71.7271	1.07077	0.0873337
313	N1	47	71.9843	1.06328	0.0873457
313	N1	48	72.2415	1.05392	0.0876328
313	N1	49	72.4987	1.04422	0.0879851
313	N1	50	72.7559	1.0354	0.0881636
313	N1	51	73.0131	1.02782	0.0879882
313	N1	52	73.2702	1.01775	0.0874083
313	N1	53	73.5274	1.00818	0.0865359
313	N1	54	73.7846	0.998364	0.0856146
313	N1	55	74.0418	0.991307	0.0849181
313	N1	56	74.299	0.987677	0.084616
313	N1	57	74.5562	0.976145	0.0846988
313	N1	58	74.8134	0.967071	0.0849991
313	N1	59	75.0706	0.956406	0.0853018
313	N1	60	75.3278	0.952733	0.0854508
313	N1	61	75.585	0.940762	0.0853906
313	N1	62	75.8422	0.931053	0.0851296
313	N1	63	76.0993	0.925	0.084677
313	N1	64	76.3565	0.917176	0.0840123
313	N1	65	76.6137	0.908912	0.0831263
313	N1	66	76.8709	0.894661	0.0820962
313	N1	67	77.1281	0.890467	0.0811292
313	N1	68	77.3853	0.884318	0.0805145
313	N1	69	77.6425	0.875515	0.0804931
313	N1	70	77.8997	0.867505	0.0811149
313	N1	71	78.1569	0.861517	0.0821881
313	N1	72	78.4141	0.851974	0.0833476
313	N1	73	78.6713	0.842063	0.0842071
313	N1	74	78.9285	0.83228	0.0845154
313	N1	75	79.1856	0.824038	0.0842305
313	N1	76	79.4428	0.816651	0.0834901
313	N1	77	79.7	0.809243	0.0825149
313	N1	78	79.9572	0.798542	0.0815126
313	N1	79	80.2144	0.793662	0.0806287
313	N1	80	80.4716	0.782064	0.0799356
313	N1	81	80.7288	0.77827	0.0794486
313	N1	82	80.986	0.768141	0.0791425
313	N1	83	81.2432	0.76148	0.0789724
313	N1	84	81.5004	0.752285	0.0788978
313	N1	85	81.7576	0.744213	0.0788923
313	N1	86	82.0147	0.738093	0.0789366
313	N1	87	82.2719	0.730651	0.0790112
313	N1	88	82.5291	0.721278	0.0791069
313	N1	89	82.7863	0.712683	0.0792568
313	N1	90	83.0435	0.704258	0.0795546
313	N1	91	83.3007	0.699051	0.0801254
313	N1	92	83.5579	0.691384	0.0810571
313	N1	93	83.8151	0.681549	0.0823439
313	N1	94	84.0723	0.675014	0.083883
313	N1	95	84.3295	0.66454	0.0855242
313	N1	96	84.5867	0.656445	0.0871281
313	N1	97	84.8438	0.648211	0.0885864
313	N1	98	85.101	0.639191	0.0898049
313	N1	99	85.3582	0.628921	0.0906726
313	N1	100	85.6154	0.620569	0.0910631
313	N1	101	85.8726	0.61113	0.0908844
313	N1	102	86.1298	0.60105	0.0901733
313	N1	103	86.387	0.590917	0.0891803
313	N1	104	86.6442	0.583164	0.0883972
313	N1	105	86.9014	0.573619	0.0884919
313	N1	106	87.1586	0.564688	0.0902013
313	N1	107	87.4158	0.55403	0.0943129
313	N1	108	87.673	0.544588	0.101859
313	N1	109	87.9301	0.534537	0.114543
313	N1	110	88.1873	0.522419	0.135183
313	N1	111	88.4445	0.511211	0.167735
313	N1	112	88.7017	0.497458	0.216366
313	N1	113	88.9589	0.481723	0.283301
313	N1	114	89.2161	0.459702	0.365944
313	N1	115	89.4733	0.420699	0.454685
313	N1	116	89.7305	0.337274	0.533331
313	N1	117	89.9877	0.205459	0.583189
313	N1	118	90.2449	0.0861662	0.589742
313	N1	119	90.5021	0.0245392	0.548769
313	N1	120	90.7592	0.00870883	0.468467
313	N1	121	91.0164	0.00534151	0.366253
313	N1	122	91.2736	0.00352563	0.262041
313	N1	123	91.5308	0.00375075	0.171603
313	N1	124	91.788	0.00360847	0.103022
313	N1	125	92.0452	0.00350833	0.0569426
313	N1	126	92.3024	0.00264387	0.0292784
313	N1	127	92.5596	0.00285746	0.0143444
313	N1	128	92.8168	0.00217709	0.00704756
313	N1	129	93.074	0.00270029	0.00378711
313	N1	130	93.3312	0.00220108	0.00242493
313	N1	131	93.5883	0.00200142	0.00186
313	N1	132	93.8455	0.0017905	0.00158534
313	N1	133	94.1027	0.00210769	0.00138376
313	N1	134	94.3599	0.00131193	0.00116862
313	N1	135	94.6171	0.00127417	0.000917526
313	N1	136	94.8743	0.00147557	0.000646096
314	N2	1	60.1535	1.55664	0.0965007
314	N2	2	60.4107	1.54982	0.0961527
314	N2	3	60.6679	1.54254	0.0962236
314	N2	4	60.9251	1.53318	0.0968297
314	N2	5	61.1823	1.53252	0.0978411
314	N2	6	61.4395	1.51763	0.0989154
314	N2	7	61.6966	1.50286	0.09968
314	N2	8	61.9538	1.49851	0.0999492
314	N2	9	62.211	1.48407	0.0998116
314	N2	10	62.4682	1.47784	0.0995317
314	N2	11	62.7254	1.46823	0.099353
314	N2	12	62.9826	1.46321	0.099369
314	N2	13	63.2398	1.44697	0.099518
314	N2	14	63.497	1.4385	0.0996814
314	N2	15	63.7542	1.43114	0.0997693
314	N2	16	64.0114	1.42123	0.0997382
314	N2	17	64.2686	1.40959	0.0995608
314	N2	18	64.5257	1.40583	0.0992078
314	N2	19	64.7829	1.38748	0.0986592
314	N2	20	65.0401	1.3819	0.0979354
314	N2	21	65.2973	1.37865	0.09711
314	N2	22	65.5545	1.35893	0.0962984
314	N2	23	65.8117	1.35584	0.0956304
314	N2	24	66.0689	1.3462	0.0952184
314	N2	25	66.3261	1.33861	0.0951263
314	N2	26	66.5833	1.32619	0.095356
314	N2	27	66.8405	1.31883	0.0958422
314	N2	28	67.0977	1.31097	0.0964789
314	N2	29	67.3549	1.30133	0.0971605
314	N2	30	67.612	1.28972	0.0978168
314	N2	31	67.8692	1.27856	0.0984241
314	N2	32	68.1264	1.27539	0.0989714
314	N2	33	68.3836	1.26092	0.0994154
314	N2	34	68.6408	1.25547	0.0996677
314	N2	35	68.898	1.23922	0.0996317
314	N2	36	69.1552	1.2355	0.0992566
314	N2	37	69.4124	1.222	0.0985765
314	N2	38	69.6696	1.21551	0.0977091
314	N2	39	69.9268	1.20524	0.0968211
314	N2	40	70.184	1.19403	0.0960742
314	N2	41	70.4411	1.18636	0.0955546
314	N2	42	70.6983	1.18085	0.0952169
314	N2	43	70.9555	1.16878	0.0948911
314	N2	44	71.2127	1.1597	0.0943723
314	N2	45	71.4699	1.14964	0.0935559
314	N2	46	71.7271	1.13939	0.0925336
314	N2	47	71.9843	1.1323	0.0915648
314	N2	48	72.2415	1.12407	0.0909339
314	N2	49	72.4987	1.11655	0.0907842
314	N2	50	72.7559	1.10781	0.0910439
314	N2	51	73.0131	1.09979	0.0914934
314	N2	52	73.2702	1.08874	0.0919105
314	N2	53	73.5274	1.0771	0.0921952
314	N2	54	73.7846	1.07274	0.0923729
314	N2	55	74.0418	1.06443	0.0925111
314	N2	56	74.299	1.05429	0.0926241
314	N2	57	74.5562	1.04577	0.0926613
314	N2	58	74.8134	1.03386	0.0925663
314	N2	59	75.0706	1.02707	0.0923383
314	N2	60	75.3278	1.01954	0.0920279
314	N2	61	75.585	1.00831	0.0916771
314	N2	62	75.8422	1.00312	0.0912752
314	N2	63	76.0993	0.991194	0.0907699
314	N2	64	76.3565	0.983201	0.0901306
314	N2	65	76.6137	0.972589	0.0893988
314	N2	66	76.8709	0.966117	0.0886805
314	N2	67	77.1281	0.960937	0.0880879
314	N2	68	77.3853	0.947051	0.0876869
314	N2	69	77.6425	0.94136	0.0874758
314	N2	70	77.8997	0.93327	0.0874009
314	N2	71	78.1569	0.923979	0.0873807
314	N2	72	78.4141	0.917581	0.0873245
314	N2	73	78.6713	0.905594	0.0871421
314	N2	74	78.9285	0.89924	0.0867659
314	N2	75	79.1856	0.892423	0.0861735
314	N2	76	79.4428	0.880249	0.0854078
314	N2	77	79.7	0.874802	0.0845813
314	N2	78	79.9572	0.865856	0.083856
314	N2	79	80.2144	0.858663	0.0833921
314	N2	80	80.4716	0.850714	0.0832936
314	N2	81	80.7288	0.843991	0.0835666
314	N2	82	80.986	0.835187	0.0841226
314	N2	83	81.2432	0.826758	0.0848108
314	N2	84	81.5004	0.817508	0.0854685
314	N2	85	81.7576	0.812327	0.0859575
314	N2	86	82.0147	0.802391	0.0862012
314	N2	87	82.2719	0.791953	0.0862158
314	N2	88	82.5291	0.785874	0.0861231
314	N2	89	82.7863	0.775726	0.0861195
314	N2	90	83.0435	0.769936	0.0863941
314	N2	91	83.3007	0.761905	0.0870402
314	N2	92	83.5579	0.75513	0.0880208
314	N2	93	83.8151	0.742317	0.0892155
314	N2	94	84.0723	0.735028	0.0905049
314	N2	95	84.3295	0.727544	0.0918265
314	N2	96	84.5867	0.718894	0.0931621
314	N2	97	84.8438	0.709257	0.0944853
314	N2	98	85.101	0.700496	0.0957145
314	N2	99	85.3582	0.689154	0.0967099
314	N2	100	85.6154	0.682542	0.0973071
314	N2	101	85.8726	0.671507	0.0973877
314	N2	102	86.1298	0.661268	0.0969597
314	N2	103	86.387	0.65155	0.096237
314	N2	104	86.6442	0.64304	0.0956678
314	N2	105	86.9014	0.63282	0.0958808
314	N2	106	87.1586	0.62281	0.0975965
314	N2	107	87.4158	0.612908	0.101614
314	N2	108	87.673	0.602589	0.10902
314	N2	109	87.9301	0.591439	0.121647
314	N2	110	88.1873	0.580297	0.14255
314	N2	111	88.4445	0.568796	0.176048
314	N2	112	88.7017	0.554978	0.226714
314	N2	113	88.9589	0.539855	0.29706
314	N2	114	89.2161	0.519253	0.384399
314	N2	115	89.4733	0.47933	0.478489
314	N2	116	89.7305	0.394115	0.561994
314	N2	117	89.9877	0.260041	0.61491
314	N2	118	90.2449	0.138033	0.621745
314	N2	119	90.5021	0.0772266	0.578076
314	N2	120	90.7592	0.0617514	0.492765
314	N2	121	91.0164	0.0590962	0.384458
314	N2	122	91.2736	0.0582066	0.27435
314	N2	123	91.5308	0.0573631	0.179107
314	N2	124	91.788	0.0575174	0.107151
314	N2	125	92.0452	0.0571424	0.0590082
314	N2	126	92.3024	0.0568055	0.0302433
314	N2	127	92.5596	0.0568748	0.0147996
314	N2	128	92.8168	0.0565441	0.00729708
314	N2	129	93.074	0.0558712	0.00395993
314	N2	130	93.3312	0.0557712	0.00256953
314	N2	131	93.5883	0.0563954	0.00200336
314	N2	132	93.8455	0.0562345	0.00175268
314	N2	133	94.1027	0.0555902	0.0015898
314	N2	134	94.3599	0.0549359	0.00140299
314	N2	135	94.6171	0.0552464	0.00114529
314	N2	136	94.8743	0.055075	0.000826255
315	N3	1	60.1535	1.55668	0.0949503
315	N3	2	60.4107	1.55241	0.0950445
315	N3	3	60.6679	1.54666	0.0952471
315	N3	4	60.9251	1.53458	0.0955203
315	N3	5	61.1823	1.52543	0.0958501
315	N3	6	61.4395	1.51641	0.0962602
315	N3	7	61.6966	1.50765	0.0967841
315	N3	8	61.9538	1.49766	0.0974021
315	N3	9	62.211	1.48828	0.0979951
315	N3	10	62.4682	1.48114	0.0983625
315	N3	11	62.7254	1.46615	0.0983097
315	N3	12	62.9826	1.46143	0.0977734
315	N3	13	63.2398	1.44681	0.0968974
315	N3	14	63.497	1.43777	0.0959932
315	N3	15	63.7542	1.42996	0.0953932
315	N3	16	64.0114	1.42384	0.0952869
315	N3	17	64.2686	1.41577	0.0956663
315	N3	18	64.5257	1.40353	0.0963922
315	N3	19	64.7829	1.38958	0.0973024
315	N3	20	65.0401	1.38168	0.0982427
315	N3	21	65.2973	1.38132	0.0990102
315	N3	22	65.5545	1.36795	0.0993324
315	N3	23	65.8117	1.35116	0.0989673
315	N3	24	66.0689	1.34269	0.0978775
315	N3	25	66.3261	1.33293	0.0963234
315	N3	26	66.5833	1.32723	0.0947766
315	N3	27	66.8405	1.31804	0.0937173
315	N3	28	67.0977	1.30568	0.0934346
315	N3	29	67.3549	1.30107	0.0939537
315	N3	30	67.612	1.29141	0.0950621
315	N3	31	67.8692	1.27988	0.0964042
315	N3	32	68.1264	1.2718	0.0975744
315	N3	33	68.3836	1.26109	0.0982121
315	N3	34	68.6408	1.25077	0.0980939
315	N3	35	68.898	1.24259	0.0972229
315	N3	36	69.1552	1.22944	0.0958674
315	N3	37	69.4124	1.21861	0.0944906
315	N3	38	69.6696	1.21437	0.0935632
315	N3	39	69.9268	1.20772	0.0933395
315	N3	40	70.184	1.19679	0.0937382
315	N3	41	70.4411	1.18903	0.0944096
315	N3	42	70.6983	1.17552	0.0949427
315	N3	43	70.9555	1.16533	0.095077
315	N3	44	71.2127	1.15945	0.0947729
315	N3	45	71.4699	1.14871	0.0941524
315	N3	46	71.7271	1.14099	0.0933881
315	N3	47	71.9843	1.12921	0.0926262
315	N3	48	72.2415	1.12095	0.0919695
315	N3	49	72.4987	1.11221	0.0914783
315	N3	50	72.7559	1.10609	0.0911618
315	N3	51	73.0131	1.09435	0.0909745
315	N3	52	73.2702	1.08531	0.0908329
315	N3	53	73.5274	1.07786	0.0906539
315	N3	54	73.7846	1.06771	0.0903988
315	N3	55	74.0418	1.06008	0.0900926
315	N3	56	74.299	1.05061	0.089821
315	N3	57	74.5562	1.0409	0.0896942
315	N3	58	74.8134	1.03329	0.0897887
315	N3	59	75.0706	1.02541	0.0900835
315	N3	60	75.3278	1.01765	0.0904438
315	N3	61	75.585	1.00696	0.0906677
[truncated: 2,115 more rows]
