# Supplementary material for: Transcriptomic identification of HBx-associated hub genes in hepatocellular carcinoma
Source: PeerJ. 2021 Dec 22;9:e12697. doi: 10.7717/peerj.12697 (PMC8710059; doi:10.7717/peerj.12697)
Supplement: Supplemental Information 11 [file peerj-09-12697-s011.xlsx]

## Sheet: Sample Setup
Block Type	384-Well Block
Calibration Background is expired	Yes
Calibration Background performed on	10-12-2018 11:47:46 PDT
Calibration FAM is expired	Yes
Calibration FAM performed on	10-23-2018 10:23:19 PDT
Calibration MELTDOCTOR is expired	Yes
Calibration MELTDOCTOR performed on	09-26-2017 21:22:46 PDT
Calibration NED is expired	Yes
Calibration NED performed on	10-23-2018 10:33:14 PDT
Calibration ROI is expired	Yes
Calibration ROI performed on	10-12-2018 09:37:21 PDT
Calibration ROX is expired	Yes
Calibration ROX performed on	10-23-2018 10:07:21 PDT
Calibration SYBR is expired	Yes
Calibration SYBR performed on	10-23-2018 09:57:53 PDT
Calibration TAMRA is expired	Yes
Calibration TAMRA performed on	10-23-2018 10:45:25 PDT
Calibration Uniformity is expired	Yes
Calibration Uniformity performed on	10-12-2018 10:06:59 PDT
Calibration VIC is expired	Yes
Calibration VIC performed on	10-23-2018 10:54:25 PDT
Chemistry	SYBR_GREEN
Date Created	09-05-2021 20:23:11 PDT
Experiment File Name	D:\NZZ\2021-09-05 185218.eds
Experiment Name	2021-09-05 185218
Experiment Run End Time	09-05-2021 13:39:19 PDT
Experiment Type	Comparative Cт (ΔΔCт)
Instrument Name	285880860
Instrument Serial Number	285880860
Instrument Type	QuantStudio 12K Flex
Passive Reference	ROX
Quantification Cycle Method	Ct
Signal Smoothing On	true
Stage/ Cycle where Analysis is performed	Stage 2, Step 2
Well	Well Position	Sample Name	Sample Color	Biogroup Name	Biogroup Color	Target Name	Target Color	Task	Reporter	Quencher	Quantity	Comments
1	A1	m-vec-1	RGB(176,23,31)			mANGPTL6	RGB(176,23,31)	UNKNOWN	SYBR	None
2	A2	m-vec-1	RGB(176,23,31)			mANGPTL6	RGB(176,23,31)	UNKNOWN	SYBR	None
3	A3	m-vec-1	RGB(176,23,31)			mANGPTL6	RGB(176,23,31)	UNKNOWN	SYBR	None
4	A4	m-vec-2	RGB(0,0,255)			mANGPTL6	RGB(176,23,31)	UNKNOWN	SYBR	None
5	A5	m-vec-2	RGB(0,0,255)			mANGPTL6	RGB(176,23,31)	UNKNOWN	SYBR	None
6	A6	m-vec-2	RGB(0,0,255)			mANGPTL6	RGB(176,23,31)	UNKNOWN	SYBR	None
7	A7	m-HBx-1	RGB(0,139,69)			mANGPTL6	RGB(176,23,31)	UNKNOWN	SYBR	None
8	A8	m-HBx-1	RGB(0,139,69)			mANGPTL6	RGB(176,23,31)	UNKNOWN	SYBR	None
9	A9	m-HBx-1	RGB(0,139,69)			mANGPTL6	RGB(176,23,31)	UNKNOWN	SYBR	None
10	A10	m-HBx-2	RGB(255,127,0)			mANGPTL6	RGB(176,23,31)	UNKNOWN	SYBR	None
11	A11	m-HBx-2	RGB(255,127,0)			mANGPTL6	RGB(176,23,31)	UNKNOWN	SYBR	None
12	A12	m-HBx-2	RGB(255,127,0)			mANGPTL6	RGB(176,23,31)	UNKNOWN	SYBR	None
13	A13	HepG2	RGB(142,56,142)			hANGPTL6	RGB(0,0,255)	UNKNOWN	SYBR	None
14	A14	HepG2	RGB(142,56,142)			hANGPTL6	RGB(0,0,255)	UNKNOWN	SYBR	None
15	A15	HepG2	RGB(142,56,142)			hANGPTL6	RGB(0,0,255)	UNKNOWN	SYBR	None
16	A16	HepG2 2.15	RGB(198,113,113)			hANGPTL6	RGB(0,0,255)	UNKNOWN	SYBR	None
17	A17	HepG2 2.15	RGB(198,113,113)			hANGPTL6	RGB(0,0,255)	UNKNOWN	SYBR	None
18	A18	HepG2 2.15	RGB(198,113,113)			hANGPTL6	RGB(0,0,255)	UNKNOWN	SYBR	None
19	A19	vec-7721	RGB(139,137,112)			hANGPTL6	RGB(0,0,255)	UNKNOWN	SYBR	None
20	A20	vec-7721	RGB(139,137,112)			hANGPTL6	RGB(0,0,255)	UNKNOWN	SYBR	None
21	A21	vec-7721	RGB(139,137,112)			hANGPTL6	RGB(0,0,255)	UNKNOWN	SYBR	None
22	A22	HBx-7721	RGB(238,121,66)			hANGPTL6	RGB(0,0,255)	UNKNOWN	SYBR	None
23	A23	HBx-7721	RGB(238,121,66)			hANGPTL6	RGB(0,0,255)	UNKNOWN	SYBR	None
24	A24	HBx-7721	RGB(238,121,66)			hANGPTL6	RGB(0,0,255)	UNKNOWN	SYBR	None
25	B1	m-vec-1	RGB(176,23,31)			mPALM2	RGB(0,139,69)	UNKNOWN	SYBR	None
26	B2	m-vec-1	RGB(176,23,31)			mPALM2	RGB(0,139,69)	UNKNOWN	SYBR	None
27	B3	m-vec-1	RGB(176,23,31)			mPALM2	RGB(0,139,69)	UNKNOWN	SYBR	None
28	B4	m-vec-2	RGB(0,0,255)			mPALM2	RGB(0,139,69)	UNKNOWN	SYBR	None
29	B5	m-vec-2	RGB(0,0,255)			mPALM2	RGB(0,139,69)	UNKNOWN	SYBR	None
30	B6	m-vec-2	RGB(0,0,255)			mPALM2	RGB(0,139,69)	UNKNOWN	SYBR	None
31	B7	m-HBx-1	RGB(0,139,69)			mPALM2	RGB(0,139,69)	UNKNOWN	SYBR	None
32	B8	m-HBx-1	RGB(0,139,69)			mPALM2	RGB(0,139,69)	UNKNOWN	SYBR	None
33	B9	m-HBx-1	RGB(0,139,69)			mPALM2	RGB(0,139,69)	UNKNOWN	SYBR	None
34	B10	m-HBx-2	RGB(255,127,0)			mPALM2	RGB(0,139,69)	UNKNOWN	SYBR	None
35	B11	m-HBx-2	RGB(255,127,0)			mPALM2	RGB(0,139,69)	UNKNOWN	SYBR	None
36	B12	m-HBx-2	RGB(255,127,0)			mPALM2	RGB(0,139,69)	UNKNOWN	SYBR	None
37	B13	HepG2	RGB(142,56,142)			hPALM2	RGB(238,238,0)	UNKNOWN	SYBR	None
38	B14	HepG2	RGB(142,56,142)			hPALM2	RGB(238,238,0)	UNKNOWN	SYBR	None
39	B15	HepG2	RGB(142,56,142)			hPALM2	RGB(238,238,0)	UNKNOWN	SYBR	None
40	B16	HepG2 2.15	RGB(198,113,113)			hPALM2	RGB(238,238,0)	UNKNOWN	SYBR	None
41	B17	HepG2 2.15	RGB(198,113,113)			hPALM2	RGB(238,238,0)	UNKNOWN	SYBR	None
42	B18	HepG2 2.15	RGB(198,113,113)			hPALM2	RGB(238,238,0)	UNKNOWN	SYBR	None
43	B19	vec-7721	RGB(139,137,112)			hPALM2	RGB(238,238,0)	UNKNOWN	SYBR	None
44	B20	vec-7721	RGB(139,137,112)			hPALM2	RGB(238,238,0)	UNKNOWN	SYBR	None
45	B21	vec-7721	RGB(139,137,112)			hPALM2	RGB(238,238,0)	UNKNOWN	SYBR	None
46	B22	HBx-7721	RGB(238,121,66)			hPALM2	RGB(238,238,0)	UNKNOWN	SYBR	None
47	B23	HBx-7721	RGB(238,121,66)			hPALM2	RGB(238,238,0)	UNKNOWN	SYBR	None
48	B24	HBx-7721	RGB(238,121,66)			hPALM2	RGB(238,238,0)	UNKNOWN	SYBR	None
49	C1	m-vec-1	RGB(176,23,31)			mC8A	RGB(139,137,112)	UNKNOWN	SYBR	None
50	C2	m-vec-1	RGB(176,23,31)			mC8A	RGB(139,137,112)	UNKNOWN	SYBR	None
51	C3	m-vec-1	RGB(176,23,31)			mC8A	RGB(139,137,112)	UNKNOWN	SYBR	None
52	C4	m-vec-2	RGB(0,0,255)			mC8A	RGB(139,137,112)	UNKNOWN	SYBR	None
53	C5	m-vec-2	RGB(0,0,255)			mC8A	RGB(139,137,112)	UNKNOWN	SYBR	None
54	C6	m-vec-2	RGB(0,0,255)			mC8A	RGB(139,137,112)	UNKNOWN	SYBR	None
55	C7	m-HBx-1	RGB(0,139,69)			mC8A	RGB(139,137,112)	UNKNOWN	SYBR	None
56	C8	m-HBx-1	RGB(0,139,69)			mC8A	RGB(139,137,112)	UNKNOWN	SYBR	None
57	C9	m-HBx-1	RGB(0,139,69)			mC8A	RGB(139,137,112)	UNKNOWN	SYBR	None
58	C10	m-HBx-2	RGB(255,127,0)			mC8A	RGB(139,137,112)	UNKNOWN	SYBR	None
59	C11	m-HBx-2	RGB(255,127,0)			mC8A	RGB(139,137,112)	UNKNOWN	SYBR	None
60	C12	m-HBx-2	RGB(255,127,0)			mC8A	RGB(139,137,112)	UNKNOWN	SYBR	None
61	C13	HepG2	RGB(142,56,142)			hC8A	RGB(238,121,66)	UNKNOWN	SYBR	None
62	C14	HepG2	RGB(142,56,142)			hC8A	RGB(238,121,66)	UNKNOWN	SYBR	None
63	C15	HepG2	RGB(142,56,142)			hC8A	RGB(238,121,66)	UNKNOWN	SYBR	None
64	C16	HepG2 2.15	RGB(198,113,113)			hC8A	RGB(238,121,66)	UNKNOWN	SYBR	None
65	C17	HepG2 2.15	RGB(198,113,113)			hC8A	RGB(238,121,66)	UNKNOWN	SYBR	None
66	C18	HepG2 2.15	RGB(198,113,113)			hC8A	RGB(238,121,66)	UNKNOWN	SYBR	None
67	C19	vec-7721	RGB(139,137,112)			hC8A	RGB(238,121,66)	UNKNOWN	SYBR	None
68	C20	vec-7721	RGB(139,137,112)			hC8A	RGB(238,121,66)	UNKNOWN	SYBR	None
69	C21	vec-7721	RGB(139,137,112)			hC8A	RGB(238,121,66)	UNKNOWN	SYBR	None
70	C22	HBx-7721	RGB(238,121,66)			hC8A	RGB(238,121,66)	UNKNOWN	SYBR	None
71	C23	HBx-7721	RGB(238,121,66)			hC8A	RGB(238,121,66)	UNKNOWN	SYBR	None
72	C24	HBx-7721	RGB(238,121,66)			hC8A	RGB(238,121,66)	UNKNOWN	SYBR	None
73	D1	m-vec-1	RGB(176,23,31)			mTAT	RGB(142,56,142)	UNKNOWN	SYBR	None
74	D2	m-vec-1	RGB(176,23,31)			mTAT	RGB(142,56,142)	UNKNOWN	SYBR	None
75	D3	m-vec-1	RGB(176,23,31)			mTAT	RGB(142,56,142)	UNKNOWN	SYBR	None
76	D4	m-vec-2	RGB(0,0,255)			mTAT	RGB(142,56,142)	UNKNOWN	SYBR	None
77	D5	m-vec-2	RGB(0,0,255)			mTAT	RGB(142,56,142)	UNKNOWN	SYBR	None
78	D6	m-vec-2	RGB(0,0,255)			mTAT	RGB(142,56,142)	UNKNOWN	SYBR	None
79	D7	m-HBx-1	RGB(0,139,69)			mTAT	RGB(142,56,142)	UNKNOWN	SYBR	None
80	D8	m-HBx-1	RGB(0,139,69)			mTAT	RGB(142,56,142)	UNKNOWN	SYBR	None
81	D9	m-HBx-1	RGB(0,139,69)			mTAT	RGB(142,56,142)	UNKNOWN	SYBR	None
82	D10	m-HBx-2	RGB(255,127,0)			mTAT	RGB(142,56,142)	UNKNOWN	SYBR	None
83	D11	m-HBx-2	RGB(255,127,0)			mTAT	RGB(142,56,142)	UNKNOWN	SYBR	None
84	D12	m-HBx-2	RGB(255,127,0)			mTAT	RGB(142,56,142)	UNKNOWN	SYBR	None
85	D13	HepG2	RGB(142,56,142)			hTAT	RGB(198,113,113)	UNKNOWN	SYBR	None
86	D14	HepG2	RGB(142,56,142)			hTAT	RGB(198,113,113)	UNKNOWN	SYBR	None
87	D15	HepG2	RGB(142,56,142)			hTAT	RGB(198,113,113)	UNKNOWN	SYBR	None
88	D16	HepG2 2.15	RGB(198,113,113)			hTAT	RGB(198,113,113)	UNKNOWN	SYBR	None
89	D17	HepG2 2.15	RGB(198,113,113)			hTAT	RGB(198,113,113)	UNKNOWN	SYBR	None
90	D18	HepG2 2.15	RGB(198,113,113)			hTAT	RGB(198,113,113)	UNKNOWN	SYBR	None
91	D19	vec-7721	RGB(139,137,112)			hTAT	RGB(198,113,113)	UNKNOWN	SYBR	None
92	D20	vec-7721	RGB(139,137,112)			hTAT	RGB(198,113,113)	UNKNOWN	SYBR	None
93	D21	vec-7721	RGB(139,137,112)			hTAT	RGB(198,113,113)	UNKNOWN	SYBR	None
94	D22	HBx-7721	RGB(238,121,66)			hTAT	RGB(198,113,113)	UNKNOWN	SYBR	None
95	D23	HBx-7721	RGB(238,121,66)			hTAT	RGB(198,113,113)	UNKNOWN	SYBR	None
96	D24	HBx-7721	RGB(238,121,66)			hTAT	RGB(198,113,113)	UNKNOWN	SYBR	None
97	E1	m-vec-1	RGB(176,23,31)			mCyclophilion	RGB(0,245,255)	UNKNOWN	SYBR	None
98	E2	m-vec-1	RGB(176,23,31)			mCyclophilion	RGB(0,245,255)	UNKNOWN	SYBR	None
99	E3	m-vec-1	RGB(176,23,31)			mCyclophilion	RGB(0,245,255)	UNKNOWN	SYBR	None
100	E4	m-vec-2	RGB(0,0,255)			mCyclophilion	RGB(0,245,255)	UNKNOWN	SYBR	None
101	E5	m-vec-2	RGB(0,0,255)			mCyclophilion	RGB(0,245,255)	UNKNOWN	SYBR	None
102	E6	m-vec-2	RGB(0,0,255)			mCyclophilion	RGB(0,245,255)	UNKNOWN	SYBR	None
103	E7	m-HBx-1	RGB(0,139,69)			mCyclophilion	RGB(0,245,255)	UNKNOWN	SYBR	None
104	E8	m-HBx-1	RGB(0,139,69)			mCyclophilion	RGB(0,245,255)	UNKNOWN	SYBR	None
105	E9	m-HBx-1	RGB(0,139,69)			mCyclophilion	RGB(0,245,255)	UNKNOWN	SYBR	None
106	E10	m-HBx-2	RGB(255,127,0)			mCyclophilion	RGB(0,245,255)	UNKNOWN	SYBR	None
107	E11	m-HBx-2	RGB(255,127,0)			mCyclophilion	RGB(0,245,255)	UNKNOWN	SYBR	None
108	E12	m-HBx-2	RGB(255,127,0)			mCyclophilion	RGB(0,245,255)	UNKNOWN	SYBR	None
109	E13	HepG2	RGB(142,56,142)			hCyclophilion	RGB(238,220,130)	UNKNOWN	SYBR	None
110	E14	HepG2	RGB(142,56,142)			hCyclophilion	RGB(238,220,130)	UNKNOWN	SYBR	None
111	E15	HepG2	RGB(142,56,142)			hCyclophilion	RGB(238,220,130)	UNKNOWN	SYBR	None
112	E16	HepG2 2.15	RGB(198,113,113)			hCyclophilion	RGB(238,220,130)	UNKNOWN	SYBR	None
113	E17	HepG2 2.15	RGB(198,113,113)			hCyclophilion	RGB(238,220,130)	UNKNOWN	SYBR	None
114	E18	HepG2 2.15	RGB(198,113,113)			hCyclophilion	RGB(238,220,130)	UNKNOWN	SYBR	None
115	E19	vec-7721	RGB(139,137,112)			hCyclophilion	RGB(238,220,130)	UNKNOWN	SYBR	None
116	E20	vec-7721	RGB(139,137,112)			hCyclophilion	RGB(238,220,130)	UNKNOWN	SYBR	None
117	E21	vec-7721	RGB(139,137,112)			hCyclophilion	RGB(238,220,130)	UNKNOWN	SYBR	None
118	E22	HBx-7721	RGB(238,121,66)			hCyclophilion	RGB(238,220,130)	UNKNOWN	SYBR	None
119	E23	HBx-7721	RGB(238,121,66)			hCyclophilion	RGB(238,220,130)	UNKNOWN	SYBR	None
120	E24	HBx-7721	RGB(238,121,66)			hCyclophilion	RGB(238,220,130)	UNKNOWN	SYBR	None
121	F1	m-vec-1	RGB(176,23,31)			mGNAL	RGB(255,127,0)	UNKNOWN	SYBR	None
122	F2	m-vec-1	RGB(176,23,31)			mGNAL	RGB(255,127,0)	UNKNOWN	SYBR	None
123	F3	m-vec-1	RGB(176,23,31)			mGNAL	RGB(255,127,0)	UNKNOWN	SYBR	None
124	F4	m-vec-2	RGB(0,0,255)			mGNAL	RGB(255,127,0)	UNKNOWN	SYBR	None
125	F5	m-vec-2	RGB(0,0,255)			mGNAL	RGB(255,127,0)	UNKNOWN	SYBR	None
126	F6	m-vec-2	RGB(0,0,255)			mGNAL	RGB(255,127,0)	UNKNOWN	SYBR	None
127	F7	m-HBx-1	RGB(0,139,69)			mGNAL	RGB(255,127,0)	UNKNOWN	SYBR	None
128	F8	m-HBx-1	RGB(0,139,69)			mGNAL	RGB(255,127,0)	UNKNOWN	SYBR	None
129	F9	m-HBx-1	RGB(0,139,69)			mGNAL	RGB(255,127,0)	UNKNOWN	SYBR	None
130	F10	m-HBx-2	RGB(255,127,0)			mGNAL	RGB(255,127,0)	UNKNOWN	SYBR	None
131	F11	m-HBx-2	RGB(255,127,0)			mGNAL	RGB(255,127,0)	UNKNOWN	SYBR	None
132	F12	m-HBx-2	RGB(255,127,0)			mGNAL	RGB(255,127,0)	UNKNOWN	SYBR	None
133	F13	HepG2	RGB(142,56,142)			hGNAL	RGB(142,142,56)	UNKNOWN	SYBR	None
134	F14	HepG2	RGB(142,56,142)			hGNAL	RGB(142,142,56)	UNKNOWN	SYBR	None
135	F15	HepG2	RGB(142,56,142)			hGNAL	RGB(142,142,56)	UNKNOWN	SYBR	None
136	F16	HepG2 2.15	RGB(198,113,113)			hGNAL	RGB(142,142,56)	UNKNOWN	SYBR	None
137	F17	HepG2 2.15	RGB(198,113,113)			hGNAL	RGB(142,142,56)	UNKNOWN	SYBR	None
138	F18	HepG2 2.15	RGB(198,113,113)			hGNAL	RGB(142,142,56)	UNKNOWN	SYBR	None
139	F19	vec-7721	RGB(139,137,112)			hGNAL	RGB(142,142,56)	UNKNOWN	SYBR	None
140	F20	vec-7721	RGB(139,137,112)			hGNAL	RGB(142,142,56)	UNKNOWN	SYBR	None
141	F21	vec-7721	RGB(139,137,112)			hGNAL	RGB(142,142,56)	UNKNOWN	SYBR	None
142	F22	HBx-7721	RGB(238,121,66)			hGNAL	RGB(142,142,56)	UNKNOWN	SYBR	None
143	F23	HBx-7721	RGB(238,121,66)			hGNAL	RGB(142,142,56)	UNKNOWN	SYBR	None
144	F24	HBx-7721	RGB(238,121,66)			hGNAL	RGB(142,142,56)	UNKNOWN	SYBR	None
145	G1	m-vec-1	RGB(176,23,31)			mMAGEA6	RGB(51,161,201)	UNKNOWN	SYBR	None
146	G2	m-vec-1	RGB(176,23,31)			mMAGEA6	RGB(51,161,201)	UNKNOWN	SYBR	None
147	G3	m-vec-1	RGB(176,23,31)			mMAGEA6	RGB(51,161,201)	UNKNOWN	SYBR	None
148	G4	m-vec-2	RGB(0,0,255)			mMAGEA6	RGB(51,161,201)	UNKNOWN	SYBR	None
149	G5	m-vec-2	RGB(0,0,255)			mMAGEA6	RGB(51,161,201)	UNKNOWN	SYBR	None
150	G6	m-vec-2	RGB(0,0,255)			mMAGEA6	RGB(51,161,201)	UNKNOWN	SYBR	None
151	G7	m-HBx-1	RGB(0,139,69)			mMAGEA6	RGB(51,161,201)	UNKNOWN	SYBR	None
152	G8	m-HBx-1	RGB(0,139,69)			mMAGEA6	RGB(51,161,201)	UNKNOWN	SYBR	None
153	G9	m-HBx-1	RGB(0,139,69)			mMAGEA6	RGB(51,161,201)	UNKNOWN	SYBR	None
154	G10	m-HBx-2	RGB(255,127,0)			mMAGEA6	RGB(51,161,201)	UNKNOWN	SYBR	None
155	G11	m-HBx-2	RGB(255,127,0)			mMAGEA6	RGB(51,161,201)	UNKNOWN	SYBR	None
156	G12	m-HBx-2	RGB(255,127,0)			mMAGEA6	RGB(51,161,201)	UNKNOWN	SYBR	None
157	G13	HepG2	RGB(142,56,142)			hMAGEA6	RGB(238,18,137)	UNKNOWN	SYBR	None
158	G14	HepG2	RGB(142,56,142)			hMAGEA6	RGB(238,18,137)	UNKNOWN	SYBR	None
159	G15	HepG2	RGB(142,56,142)			hMAGEA6	RGB(238,18,137)	UNKNOWN	SYBR	None
160	G16	HepG2 2.15	RGB(198,113,113)			hMAGEA6	RGB(238,18,137)	UNKNOWN	SYBR	None
161	G17	HepG2 2.15	RGB(198,113,113)			hMAGEA6	RGB(238,18,137)	UNKNOWN	SYBR	None
162	G18	HepG2 2.15	RGB(198,113,113)			hMAGEA6	RGB(238,18,137)	UNKNOWN	SYBR	None
163	G19	vec-7721	RGB(139,137,112)			hMAGEA6	RGB(238,18,137)	UNKNOWN	SYBR	None
164	G20	vec-7721	RGB(139,137,112)			hMAGEA6	RGB(238,18,137)	UNKNOWN	SYBR	None
165	G21	vec-7721	RGB(139,137,112)			hMAGEA6	RGB(238,18,137)	UNKNOWN	SYBR	None
166	G22	HBx-7721	RGB(238,121,66)			hMAGEA6	RGB(238,18,137)	UNKNOWN	SYBR	None
167	G23	HBx-7721	RGB(238,121,66)			hMAGEA6	RGB(238,18,137)	UNKNOWN	SYBR	None
168	G24	HBx-7721	RGB(238,121,66)			hMAGEA6	RGB(238,18,137)	UNKNOWN	SYBR	None
169	H1	m-vec-1	RGB(176,23,31)			mFAM110C	RGB(176,23,31)	UNKNOWN	SYBR	None
170	H2	m-vec-1	RGB(176,23,31)			mFAM110C	RGB(176,23,31)	UNKNOWN	SYBR	None
171	H3	m-vec-1	RGB(176,23,31)			mFAM110C	RGB(176,23,31)	UNKNOWN	SYBR	None
172	H4	m-vec-2	RGB(0,0,255)			mFAM110C	RGB(176,23,31)	UNKNOWN	SYBR	None
173	H5	m-vec-2	RGB(0,0,255)			mFAM110C	RGB(176,23,31)	UNKNOWN	SYBR	None
174	H6	m-vec-2	RGB(0,0,255)			mFAM110C	RGB(176,23,31)	UNKNOWN	SYBR	None
175	H7	m-HBx-1	RGB(0,139,69)			mFAM110C	RGB(176,23,31)	UNKNOWN	SYBR	None
176	H8	m-HBx-1	RGB(0,139,69)			mFAM110C	RGB(176,23,31)	UNKNOWN	SYBR	None
177	H9	m-HBx-1	RGB(0,139,69)			mFAM110C	RGB(176,23,31)	UNKNOWN	SYBR	None
178	H10	m-HBx-2	RGB(255,127,0)			mFAM110C	RGB(176,23,31)	UNKNOWN	SYBR	None
179	H11	m-HBx-2	RGB(255,127,0)			mFAM110C	RGB(176,23,31)	UNKNOWN	SYBR	None
180	H12	m-HBx-2	RGB(255,127,0)			mFAM110C	RGB(176,23,31)	UNKNOWN	SYBR	None
181	H13	HepG2	RGB(142,56,142)			hFAM110C	RGB(0,0,255)	UNKNOWN	SYBR	None
182	H14	HepG2	RGB(142,56,142)			hFAM110C	RGB(0,0,255)	UNKNOWN	SYBR	None
183	H15	HepG2	RGB(142,56,142)			hFAM110C	RGB(0,0,255)	UNKNOWN	SYBR	None
184	H16	HepG2 2.15	RGB(198,113,113)			hFAM110C	RGB(0,0,255)	UNKNOWN	SYBR	None
185	H17	HepG2 2.15	RGB(198,113,113)			hFAM110C	RGB(0,0,255)	UNKNOWN	SYBR	None
186	H18	HepG2 2.15	RGB(198,113,113)			hFAM110C	RGB(0,0,255)	UNKNOWN	SYBR	None
187	H19	vec-7721	RGB(139,137,112)			hFAM110C	RGB(0,0,255)	UNKNOWN	SYBR	None
188	H20	vec-7721	RGB(139,137,112)			hFAM110C	RGB(0,0,255)	UNKNOWN	SYBR	None
189	H21	vec-7721	RGB(139,137,112)			hFAM110C	RGB(0,0,255)	UNKNOWN	SYBR	None
190	H22	HBx-7721	RGB(238,121,66)			hFAM110C	RGB(0,0,255)	UNKNOWN	SYBR	None
191	H23	HBx-7721	RGB(238,121,66)			hFAM110C	RGB(0,0,255)	UNKNOWN	SYBR	None
192	H24	HBx-7721	RGB(238,121,66)			hFAM110C	RGB(0,0,255)	UNKNOWN	SYBR	None
193	I1	m-vec-1	RGB(176,23,31)			mRGS5	RGB(0,139,69)	UNKNOWN	SYBR	None
194	I2	m-vec-1	RGB(176,23,31)			mRGS5	RGB(0,139,69)	UNKNOWN	SYBR	None
195	I3	m-vec-1	RGB(176,23,31)			mRGS5	RGB(0,139,69)	UNKNOWN	SYBR	None
196	I4	m-vec-2	RGB(0,0,255)			mRGS5	RGB(0,139,69)	UNKNOWN	SYBR	None
197	I5	m-vec-2	RGB(0,0,255)			mRGS5	RGB(0,139,69)	UNKNOWN	SYBR	None
198	I6	m-vec-2	RGB(0,0,255)			mRGS5	RGB(0,139,69)	UNKNOWN	SYBR	None
199	I7	m-HBx-1	RGB(0,139,69)			mRGS5	RGB(0,139,69)	UNKNOWN	SYBR	None
200	I8	m-HBx-1	RGB(0,139,69)			mRGS5	RGB(0,139,69)	UNKNOWN	SYBR	None
201	I9	m-HBx-1	RGB(0,139,69)			mRGS5	RGB(0,139,69)	UNKNOWN	SYBR	None
202	I10	m-HBx-2	RGB(255,127,0)			mRGS5	RGB(0,139,69)	UNKNOWN	SYBR	None
203	I11	m-HBx-2	RGB(255,127,0)			mRGS5	RGB(0,139,69)	UNKNOWN	SYBR	None
204	I12	m-HBx-2	RGB(255,127,0)			mRGS5	RGB(0,139,69)	UNKNOWN	SYBR	None
205	I13	HepG2	RGB(142,56,142)			hRGS5	RGB(238,238,0)	UNKNOWN	SYBR	None
206	I14	HepG2	RGB(142,56,142)			hRGS5	RGB(238,238,0)	UNKNOWN	SYBR	None
207	I15	HepG2	RGB(142,56,142)			hRGS5	RGB(238,238,0)	UNKNOWN	SYBR	None
208	I16	HepG2 2.15	RGB(198,113,113)			hRGS5	RGB(238,238,0)	UNKNOWN	SYBR	None
209	I17	HepG2 2.15	RGB(198,113,113)			hRGS5	RGB(238,238,0)	UNKNOWN	SYBR	None
210	I18	HepG2 2.15	RGB(198,113,113)			hRGS5	RGB(238,238,0)	UNKNOWN	SYBR	None
211	I19	vec-7721	RGB(139,137,112)			hRGS5	RGB(238,238,0)	UNKNOWN	SYBR	None
212	I20	vec-7721	RGB(139,137,112)			hRGS5	RGB(238,238,0)	UNKNOWN	SYBR	None
213	I21	vec-7721	RGB(139,137,112)			hRGS5	RGB(238,238,0)	UNKNOWN	SYBR	None
214	I22	HBx-7721	RGB(238,121,66)			hRGS5	RGB(238,238,0)	UNKNOWN	SYBR	None
215	I23	HBx-7721	RGB(238,121,66)			hRGS5	RGB(238,238,0)	UNKNOWN	SYBR	None
216	I24	HBx-7721	RGB(238,121,66)			hRGS5	RGB(238,238,0)	UNKNOWN	SYBR	None
217	J1	m-vec-1	RGB(176,23,31)			mCPEB3	RGB(139,137,112)	UNKNOWN	SYBR	None
218	J2	m-vec-1	RGB(176,23,31)			mCPEB3	RGB(139,137,112)	UNKNOWN	SYBR	None
219	J3	m-vec-1	RGB(176,23,31)			mCPEB3	RGB(139,137,112)	UNKNOWN	SYBR	None
220	J4	m-vec-2	RGB(0,0,255)			mCPEB3	RGB(139,137,112)	UNKNOWN	SYBR	None
221	J5	m-vec-2	RGB(0,0,255)			mCPEB3	RGB(139,137,112)	UNKNOWN	SYBR	None
222	J6	m-vec-2	RGB(0,0,255)			mCPEB3	RGB(139,137,112)	UNKNOWN	SYBR	None
223	J7	m-HBx-1	RGB(0,139,69)			mCPEB3	RGB(139,137,112)	UNKNOWN	SYBR	None
224	J8	m-HBx-1	RGB(0,139,69)			mCPEB3	RGB(139,137,112)	UNKNOWN	SYBR	None
225	J9	m-HBx-1	RGB(0,139,69)			mCPEB3	RGB(139,137,112)	UNKNOWN	SYBR	None
226	J10	m-HBx-2	RGB(255,127,0)			mCPEB3	RGB(139,137,112)	UNKNOWN	SYBR	None
227	J11	m-HBx-2	RGB(255,127,0)			mCPEB3	RGB(139,137,112)	UNKNOWN	SYBR	None
228	J12	m-HBx-2	RGB(255,127,0)			mCPEB3	RGB(139,137,112)	UNKNOWN	SYBR	None
229	J13	HepG2	RGB(142,56,142)			hCPEB3	RGB(238,121,66)	UNKNOWN	SYBR	None
230	J14	HepG2	RGB(142,56,142)			hCPEB3	RGB(238,121,66)	UNKNOWN	SYBR	None
231	J15	HepG2	RGB(142,56,142)			hCPEB3	RGB(238,121,66)	UNKNOWN	SYBR	None
232	J16	HepG2 2.15	RGB(198,113,113)			hCPEB3	RGB(238,121,66)	UNKNOWN	SYBR	None
233	J17	HepG2 2.15	RGB(198,113,113)			hCPEB3	RGB(238,121,66)	UNKNOWN	SYBR	None
234	J18	HepG2 2.15	RGB(198,113,113)			hCPEB3	RGB(238,121,66)	UNKNOWN	SYBR	None
235	J19	vec-7721	RGB(139,137,112)			hCPEB3	RGB(238,121,66)	UNKNOWN	SYBR	None
236	J20	vec-7721	RGB(139,137,112)			hCPEB3	RGB(238,121,66)	UNKNOWN	SYBR	None
237	J21	vec-7721	RGB(139,137,112)			hCPEB3	RGB(238,121,66)	UNKNOWN	SYBR	None
238	J22	HBx-7721	RGB(238,121,66)			hCPEB3	RGB(238,121,66)	UNKNOWN	SYBR	None
239	J23	HBx-7721	RGB(238,121,66)			hCPEB3	RGB(238,121,66)	UNKNOWN	SYBR	None
240	J24	HBx-7721	RGB(238,121,66)			hCPEB3	RGB(238,121,66)	UNKNOWN	SYBR	None
241	K1	m-vec-1	RGB(176,23,31)			mALDOB	RGB(142,56,142)	UNKNOWN	SYBR	None
242	K2	m-vec-1	RGB(176,23,31)			mALDOB	RGB(142,56,142)	UNKNOWN	SYBR	None
243	K3	m-vec-1	RGB(176,23,31)			mALDOB	RGB(142,56,142)	UNKNOWN	SYBR	None
244	K4	m-vec-2	RGB(0,0,255)			mALDOB	RGB(142,56,142)	UNKNOWN	SYBR	None
245	K5	m-vec-2	RGB(0,0,255)			mALDOB	RGB(142,56,142)	UNKNOWN	SYBR	None
246	K6	m-vec-2	RGB(0,0,255)			mALDOB	RGB(142,56,142)	UNKNOWN	SYBR	None
247	K7	m-HBx-1	RGB(0,139,69)			mALDOB	RGB(142,56,142)	UNKNOWN	SYBR	None
248	K8	m-HBx-1	RGB(0,139,69)			mALDOB	RGB(142,56,142)	UNKNOWN	SYBR	None
249	K9	m-HBx-1	RGB(0,139,69)			mALDOB	RGB(142,56,142)	UNKNOWN	SYBR	None
250	K10	m-HBx-2	RGB(255,127,0)			mALDOB	RGB(142,56,142)	UNKNOWN	SYBR	None
251	K11	m-HBx-2	RGB(255,127,0)			mALDOB	RGB(142,56,142)	UNKNOWN	SYBR	None
252	K12	m-HBx-2	RGB(255,127,0)			mALDOB	RGB(142,56,142)	UNKNOWN	SYBR	None
253	K13	HepG2	RGB(142,56,142)			hALDOB	RGB(198,113,113)	UNKNOWN	SYBR	None
254	K14	HepG2	RGB(142,56,142)			hALDOB	RGB(198,113,113)	UNKNOWN	SYBR	None
255	K15	HepG2	RGB(142,56,142)			hALDOB	RGB(198,113,113)	UNKNOWN	SYBR	None
256	K16	HepG2 2.15	RGB(198,113,113)			hALDOB	RGB(198,113,113)	UNKNOWN	SYBR	None
257	K17	HepG2 2.15	RGB(198,113,113)			hALDOB	RGB(198,113,113)	UNKNOWN	SYBR	None
258	K18	HepG2 2.15	RGB(198,113,113)			hALDOB	RGB(198,113,113)	UNKNOWN	SYBR	None
259	K19	vec-7721	RGB(139,137,112)			hALDOB	RGB(198,113,113)	UNKNOWN	SYBR	None
260	K20	vec-7721	RGB(139,137,112)			hALDOB	RGB(198,113,113)	UNKNOWN	SYBR	None
261	K21	vec-7721	RGB(139,137,112)			hALDOB	RGB(198,113,113)	UNKNOWN	SYBR	None
262	K22	HBx-7721	RGB(238,121,66)			hALDOB	RGB(198,113,113)	UNKNOWN	SYBR	None
263	K23	HBx-7721	RGB(238,121,66)			hALDOB	RGB(198,113,113)	UNKNOWN	SYBR	None
264	K24	HBx-7721	RGB(238,121,66)			hALDOB	RGB(198,113,113)	UNKNOWN	SYBR	None
265	L1	m-vec-1	RGB(176,23,31)			mALDH8A1	RGB(0,245,255)	UNKNOWN	SYBR	None
266	L2	m-vec-1	RGB(176,23,31)			mALDH8A1	RGB(0,245,255)	UNKNOWN	SYBR	None
267	L3	m-vec-1	RGB(176,23,31)			mALDH8A1	RGB(0,245,255)	UNKNOWN	SYBR	None
268	L4	m-vec-2	RGB(0,0,255)			mALDH8A1	RGB(0,245,255)	UNKNOWN	SYBR	None
269	L5	m-vec-2	RGB(0,0,255)			mALDH8A1	RGB(0,245,255)	UNKNOWN	SYBR	None
270	L6	m-vec-2	RGB(0,0,255)			mALDH8A1	RGB(0,245,255)	UNKNOWN	SYBR	None
271	L7	m-HBx-1	RGB(0,139,69)			mALDH8A1	RGB(0,245,255)	UNKNOWN	SYBR	None
272	L8	m-HBx-1	RGB(0,139,69)			mALDH8A1	RGB(0,245,255)	UNKNOWN	SYBR	None
273	L9	m-HBx-1	RGB(0,139,69)			mALDH8A1	RGB(0,245,255)	UNKNOWN	SYBR	None
274	L10	m-HBx-2	RGB(255,127,0)			mALDH8A1	RGB(0,245,255)	UNKNOWN	SYBR	None
275	L11	m-HBx-2	RGB(255,127,0)			mALDH8A1	RGB(0,245,255)	UNKNOWN	SYBR	None
276	L12	m-HBx-2	RGB(255,127,0)			mALDH8A1	RGB(0,245,255)	UNKNOWN	SYBR	None
277	L13	HepG2	RGB(142,56,142)			hALDH8A1	RGB(238,220,130)	UNKNOWN	SYBR	None
278	L14	HepG2	RGB(142,56,142)			hALDH8A1	RGB(238,220,130)	UNKNOWN	SYBR	None
279	L15	HepG2	RGB(142,56,142)			hALDH8A1	RGB(238,220,130)	UNKNOWN	SYBR	None
280	L16	HepG2 2.15	RGB(198,113,113)			hALDH8A1	RGB(238,220,130)	UNKNOWN	SYBR	None
281	L17	HepG2 2.15	RGB(198,113,113)			hALDH8A1	RGB(238,220,130)	UNKNOWN	SYBR	None
282	L18	HepG2 2.15	RGB(198,113,113)			hALDH8A1	RGB(238,220,130)	UNKNOWN	SYBR	None
283	L19	vec-7721	RGB(139,137,112)			hALDH8A1	RGB(238,220,130)	UNKNOWN	SYBR	None
284	L20	vec-7721	RGB(139,137,112)			hALDH8A1	RGB(238,220,130)	UNKNOWN	SYBR	None
285	L21	vec-7721	RGB(139,137,112)			hALDH8A1	RGB(238,220,130)	UNKNOWN	SYBR	None
286	L22	HBx-7721	RGB(238,121,66)			hALDH8A1	RGB(238,220,130)	UNKNOWN	SYBR	None
287	L23	HBx-7721	RGB(238,121,66)			hALDH8A1	RGB(238,220,130)	UNKNOWN	SYBR	None
288	L24	HBx-7721	RGB(238,121,66)			hALDH8A1	RGB(238,220,130)	UNKNOWN	SYBR	None
289	M1	m-vec-1	RGB(176,23,31)			HBx	RGB(238,44,44)	UNKNOWN	SYBR	None
290	M2	m-vec-1	RGB(176,23,31)			HBx	RGB(238,44,44)	UNKNOWN	SYBR	None
291	M3	m-vec-1	RGB(176,23,31)			HBx	RGB(238,44,44)	UNKNOWN	SYBR	None
292	M4	m-vec-2	RGB(0,0,255)			HBx	RGB(238,44,44)	UNKNOWN	SYBR	None
293	M5	m-vec-2	RGB(0,0,255)			HBx	RGB(238,44,44)	UNKNOWN	SYBR	None
294	M6	m-vec-2	RGB(0,0,255)			HBx	RGB(238,44,44)	UNKNOWN	SYBR	None
295	M7	m-HBx-1	RGB(0,139,69)			HBx	RGB(238,44,44)	UNKNOWN	SYBR	None
296	M8	m-HBx-1	RGB(0,139,69)			HBx	RGB(238,44,44)	UNKNOWN	SYBR	None
297	M9	m-HBx-1	RGB(0,139,69)			HBx	RGB(238,44,44)	UNKNOWN	SYBR	None
298	M10	m-HBx-2	RGB(255,127,0)			HBx	RGB(238,44,44)	UNKNOWN	SYBR	None
299	M11	m-HBx-2	RGB(255,127,0)			HBx	RGB(238,44,44)	UNKNOWN	SYBR	None
300	M12	m-HBx-2	RGB(255,127,0)			HBx	RGB(238,44,44)	UNKNOWN	SYBR	None
301	M13	HepG2	RGB(142,56,142)			HBx	RGB(238,44,44)	UNKNOWN	SYBR	None
302	M14	HepG2	RGB(142,56,142)			HBx	RGB(238,44,44)	UNKNOWN	SYBR	None
303	M15	HepG2	RGB(142,56,142)			HBx	RGB(238,44,44)	UNKNOWN	SYBR	None
304	M16	HepG2 2.15	RGB(198,113,113)			HBx	RGB(238,44,44)	UNKNOWN	SYBR	None
305	M17	HepG2 2.15	RGB(198,113,113)			HBx	RGB(238,44,44)	UNKNOWN	SYBR	None
306	M18	HepG2 2.15	RGB(198,113,113)			HBx	RGB(238,44,44)	UNKNOWN	SYBR	None
307	M19	vec-7721	RGB(139,137,112)			HBx	RGB(238,44,44)	UNKNOWN	SYBR	None
308	M20	vec-7721	RGB(139,137,112)			HBx	RGB(238,44,44)	UNKNOWN	SYBR	None
309	M21	vec-7721	RGB(139,137,112)			HBx	RGB(238,44,44)	UNKNOWN	SYBR	None
310	M22	HBx-7721	RGB(238,121,66)			HBx	RGB(238,44,44)	UNKNOWN	SYBR	None
311	M23	HBx-7721	RGB(238,121,66)			HBx	RGB(238,44,44)	UNKNOWN	SYBR	None
312	M24	HBx-7721	RGB(238,121,66)			HBx	RGB(238,44,44)	UNKNOWN	SYBR	None
313	N1	m-vec-1	RGB(176,23,31)			mARG1	RGB(255,127,0)	UNKNOWN	SYBR	None
314	N2	m-vec-1	RGB(176,23,31)			mARG1	RGB(255,127,0)	UNKNOWN	SYBR	None
315	N3	m-vec-1	RGB(176,23,31)			mARG1	RGB(255,127,0)	UNKNOWN	SYBR	None
316	N4	m-vec-2	RGB(0,0,255)			mARG1	RGB(255,127,0)	UNKNOWN	SYBR	None
317	N5	m-vec-2	RGB(0,0,255)			mARG1	RGB(255,127,0)	UNKNOWN	SYBR	None
318	N6	m-vec-2	RGB(0,0,255)			mARG1	RGB(255,127,0)	UNKNOWN	SYBR	None
319	N7	m-HBx-1	RGB(0,139,69)			mARG1	RGB(255,127,0)	UNKNOWN	SYBR	None
320	N8	m-HBx-1	RGB(0,139,69)			mARG1	RGB(255,127,0)	UNKNOWN	SYBR	None
321	N9	m-HBx-1	RGB(0,139,69)			mARG1	RGB(255,127,0)	UNKNOWN	SYBR	None
322	N10	m-HBx-2	RGB(255,127,0)			mARG1	RGB(255,127,0)	UNKNOWN	SYBR	None
323	N11	m-HBx-2	RGB(255,127,0)			mARG1	RGB(255,127,0)	UNKNOWN	SYBR	None
324	N12	m-HBx-2	RGB(255,127,0)			mARG1	RGB(255,127,0)	UNKNOWN	SYBR	None
325	N13
326	N14
327	N15
328	N16
329	N17
330	N18
331	N19
332	N20
333	N21
334	N22
335	N23
336	N24
337	O1
338	O2
339	O3
340	O4
341	O5
342	O6
343	O7
344	O8
345	O9
346	O10
347	O11
348	O12
349	O13
350	O14
351	O15
352	O16
353	O17
354	O18
355	O19
356	O20
357	O21
358	O22
359	O23
360	O24
361	P1
362	P2
363	P3
364	P4
365	P5
366	P6
367	P7
368	P8
369	P9
370	P10
371	P11
372	P12
373	P13
374	P14
375	P15
376	P16
377	P17
378	P18
379	P19
380	P20
381	P21
382	P22
383	P23
384	P24

## Sheet: Amplification Data
Block Type	384-Well Block
Calibration Background is expired	Yes
Calibration Background performed on	10-12-2018 11:47:46 PDT
Calibration FAM is expired	Yes
Calibration FAM performed on	10-23-2018 10:23:19 PDT
Calibration MELTDOCTOR is expired	Yes
Calibration MELTDOCTOR performed on	09-26-2017 21:22:46 PDT
Calibration NED is expired	Yes
Calibration NED performed on	10-23-2018 10:33:14 PDT
Calibration ROI is expired	Yes
Calibration ROI performed on	10-12-2018 09:37:21 PDT
Calibration ROX is expired	Yes
Calibration ROX performed on	10-23-2018 10:07:21 PDT
Calibration SYBR is expired	Yes
Calibration SYBR performed on	10-23-2018 09:57:53 PDT
Calibration TAMRA is expired	Yes
Calibration TAMRA performed on	10-23-2018 10:45:25 PDT
Calibration Uniformity is expired	Yes
Calibration Uniformity performed on	10-12-2018 10:06:59 PDT
Calibration VIC is expired	Yes
Calibration VIC performed on	10-23-2018 10:54:25 PDT
Chemistry	SYBR_GREEN
Date Created	09-05-2021 20:23:11 PDT
Experiment File Name	D:\NZZ\2021-09-05 185218.eds
Experiment Name	2021-09-05 185218
Experiment Run End Time	09-05-2021 13:39:19 PDT
Experiment Type	Comparative Cт (ΔΔCт)
Instrument Name	285880860
Instrument Serial Number	285880860
Instrument Type	QuantStudio 12K Flex
Passive Reference	ROX
Quantification Cycle Method	Ct
Signal Smoothing On	true
Stage/ Cycle where Analysis is performed	Stage 2, Step 2
Well	Cycle	Target Name	Rn	Delta Rn
1	1	mANGPTL6	0.1575	-0.0236974
1	2	mANGPTL6	0.163598	-0.0191953
1	3	mANGPTL6	0.173677	-0.0107125
1	4	mANGPTL6	0.180443	-0.00554289
1	5	mANGPTL6	0.186032	-0.00155001
1	6	mANGPTL6	0.190529	0.00135152
1	7	mANGPTL6	0.194208	0.00343431
1	8	mANGPTL6	0.197335	0.00496503
1	9	mANGPTL6	0.198227	0.00426138
1	10	mANGPTL6	0.199096	0.00353399
1	11	mANGPTL6	0.20074	0.00358209
1	12	mANGPTL6	0.20181	0.00305625
1	13	mANGPTL6	0.202798	0.00244854
1	14	mANGPTL6	0.20337	0.001424
1	15	mANGPTL6	0.204763	0.00122157
1	16	mANGPTL6	0.205509	0.000371283
1	17	mANGPTL6	0.206139	-0.000595053
1	18	mANGPTL6	0.206652	-0.00167796
1	19	mANGPTL6	0.207548	-0.00237807
1	20	mANGPTL6	0.208756	-0.00276599
1	21	mANGPTL6	0.210503	-0.00261501
1	22	mANGPTL6	0.212902	-0.00181246
1	23	mANGPTL6	0.217653	0.00134317
1	24	mANGPTL6	0.226724	0.00881798
1	25	mANGPTL6	0.244074	0.0245718
1	26	mANGPTL6	0.278011	0.0569126
1	27	mANGPTL6	0.337991	0.115297
1	28	mANGPTL6	0.444813	0.220523
1	29	mANGPTL6	0.615454	0.389567
1	30	mANGPTL6	0.855499	0.628017
1	31	mANGPTL6	1.12497	0.895896
1	32	mANGPTL6	1.36537	1.1347
1	33	mANGPTL6	1.54185	1.30958
1	34	mANGPTL6	1.66378	1.42991
1	35	mANGPTL6	1.74395	1.50848
1	36	mANGPTL6	1.79855	1.56149
1	37	mANGPTL6	1.83422	1.59557
1	38	mANGPTL6	1.86062	1.62037
1	39	mANGPTL6	1.88271	1.64086
1	40	mANGPTL6	1.90275	1.65931
2	1	mANGPTL6	0.136352	-0.00861634
2	2	mANGPTL6	0.13893	-0.00692103
2	3	mANGPTL6	0.143098	-0.0036363
2	4	mANGPTL6	0.146378	-0.00123953
2	5	mANGPTL6	0.148028	-0.00047384
2	6	mANGPTL6	0.14935	-3.42786e-05
2	7	mANGPTL6	0.151257	0.000989333
2	8	mANGPTL6	0.152391	0.00123962
2	9	mANGPTL6	0.154355	0.00232042
2	10	mANGPTL6	0.154259	0.00134104
2	11	mANGPTL6	0.155119	0.00131721
2	12	mANGPTL6	0.15618	0.00149539
2	13	mANGPTL6	0.156196	0.000628034
2	14	mANGPTL6	0.156953	0.000501292
2	15	mANGPTL6	0.157314	-2.13303e-05
2	16	mANGPTL6	0.157837	-0.000381157
2	17	mANGPTL6	0.158365	-0.000736856
2	18	mANGPTL6	0.15912	-0.000864925
2	19	mANGPTL6	0.159512	-0.00135639
2	20	mANGPTL6	0.160133	-0.00161858
2	21	mANGPTL6	0.161968	-0.000667122
2	22	mANGPTL6	0.164717	0.00119796
2	23	mANGPTL6	0.169887	0.0054844
2	24	mANGPTL6	0.178315	0.0130294
2	25	mANGPTL6	0.194111	0.0279424
2	26	mANGPTL6	0.224466	0.057414
2	27	mANGPTL6	0.28106	0.113124
2	28	mANGPTL6	0.381418	0.212599
2	29	mANGPTL6	0.544396	0.374694
2	30	mANGPTL6	0.774674	0.604088
2	31	mANGPTL6	1.03939	0.867923
2	32	mANGPTL6	1.28458	1.11223
2	33	mANGPTL6	1.47546	1.30222
2	34	mANGPTL6	1.59971	1.42559
2	35	mANGPTL6	1.68205	1.50704
2	36	mANGPTL6	1.73656	1.56067
2	37	mANGPTL6	1.77768	1.60092
2	38	mANGPTL6	1.80245	1.6248
2	39	mANGPTL6	1.82376	1.64522
2	40	mANGPTL6	1.84179	1.66237
3	1	mANGPTL6	0.137575	-0.0140876
3	2	mANGPTL6	0.140539	-0.0118707
3	3	mANGPTL6	0.147138	-0.00602005
3	4	mANGPTL6	0.152527	-0.00137924
3	5	mANGPTL6	0.155836	0.0011821
3	6	mANGPTL6	0.158067	0.0026647
3	7	mANGPTL6	0.158503	0.00235234
3	8	mANGPTL6	0.15888	0.00198132
3	9	mANGPTL6	0.159171	0.00152458
3	10	mANGPTL6	0.159606	0.00121169
3	11	mANGPTL6	0.159768	0.000625792
3	12	mANGPTL6	0.16015	0.00025985
3	13	mANGPTL6	0.160375	-0.000263552
3	14	mANGPTL6	0.160275	-0.00111162
3	15	mANGPTL6	0.161188	-0.000946126
3	16	mANGPTL6	0.162311	-0.000571242
3	17	mANGPTL6	0.163477	-0.000153576
3	18	mANGPTL6	0.163635	-0.000743273
3	19	mANGPTL6	0.164062	-0.00106521
3	20	mANGPTL6	0.165005	-0.000870153
3	21	mANGPTL6	0.166226	-0.000396966
3	22	mANGPTL6	0.16909	0.00171864
3	23	mANGPTL6	0.173513	0.0053937
3	24	mANGPTL6	0.181028	0.0121614
3	25	mANGPTL6	0.195365	0.0257502
3	26	mANGPTL6	0.22153	0.0511669
3	27	mANGPTL6	0.271729	0.100617
3	28	mANGPTL6	0.362001	0.190142
3	29	mANGPTL6	0.511316	0.338709
3	30	mANGPTL6	0.729814	0.556459
3	31	mANGPTL6	0.990642	0.816539
3	32	mANGPTL6	1.2398	1.06495
3	33	mANGPTL6	1.43433	1.25873
3	34	mANGPTL6	1.56816	1.39182
3	35	mANGPTL6	1.65309	1.47599
3	36	mANGPTL6	1.70805	1.5302
3	37	mANGPTL6	1.74807	1.56948
3	38	mANGPTL6	1.7762	1.59686
3	39	mANGPTL6	1.79599	1.6159
3	40	mANGPTL6	1.81443	1.63359
4	1	mANGPTL6	0.135987	-0.00780533
4	2	mANGPTL6	0.139132	-0.00547475
4	3	mANGPTL6	0.143461	-0.00196075
4	4	mANGPTL6	0.145598	-0.000638704
4	5	mANGPTL6	0.147267	0.00021573
4	6	mANGPTL6	0.148755	0.000889414
4	7	mANGPTL6	0.149591	0.000910635
4	8	mANGPTL6	0.150348	0.000852865
4	9	mANGPTL6	0.151661	0.00135195
4	10	mANGPTL6	0.152334	0.00120996
4	11	mANGPTL6	0.152205	0.000266852
4	12	mANGPTL6	0.152276	-0.000477056
4	13	mANGPTL6	0.153051	-0.000516781
4	14	mANGPTL6	0.153705	-0.000677637
4	15	mANGPTL6	0.154733	-0.000464281
4	16	mANGPTL6	0.155789	-0.000222433
4	17	mANGPTL6	0.156255	-0.000570746
4	18	mANGPTL6	0.156641	-0.000999972
4	19	mANGPTL6	0.157475	-0.000980658
4	20	mANGPTL6	0.158737	-0.000532459
4	21	mANGPTL6	0.160595	0.000510788
4	22	mANGPTL6	0.162732	0.00183328
4	23	mANGPTL6	0.16771	0.00599662
4	24	mANGPTL6	0.177822	0.015294
4	25	mANGPTL6	0.195781	0.0324378
4	26	mANGPTL6	0.230639	0.0664819
4	27	mANGPTL6	0.294169	0.129197
4	28	mANGPTL6	0.405471	0.239685
4	29	mANGPTL6	0.584765	0.418163
4	30	mANGPTL6	0.831367	0.663951
4	31	mANGPTL6	1.10865	0.940423
4	32	mANGPTL6	1.35194	1.18289
4	33	mANGPTL6	1.52742	1.35756
4	34	mANGPTL6	1.64512	1.47445
4	35	mANGPTL6	1.72115	1.54966
4	36	mANGPTL6	1.77125	1.59895
4	37	mANGPTL6	1.80752	1.6344
4	38	mANGPTL6	1.8366	1.66266
4	39	mANGPTL6	1.85895	1.6842
4	40	mANGPTL6	1.87132	1.69576
5	1	mANGPTL6	0.198544	-0.0040696
5	2	mANGPTL6	0.20046	-0.00325428
5	3	mANGPTL6	0.203034	-0.0017802
5	4	mANGPTL6	0.204928	-0.000986445
5	5	mANGPTL6	0.207219	0.000205215
5	6	mANGPTL6	0.208758	0.000643815
5	7	mANGPTL6	0.210418	0.00120411
5	8	mANGPTL6	0.211189	0.000874917
5	9	mANGPTL6	0.212477	0.00106267
5	10	mANGPTL6	0.213343	0.000828558
5	11	mANGPTL6	0.214267	0.000652277
5	12	mANGPTL6	0.215043	0.000328087
5	13	mANGPTL6	0.215917	0.000102617
5	14	mANGPTL6	0.216532	-0.000382878
5	15	mANGPTL6	0.217034	-0.000980996
5	16	mANGPTL6	0.218161	-0.000954293
5	17	mANGPTL6	0.21937	-0.000845217
5	18	mANGPTL6	0.220417	-0.000898355
5	19	mANGPTL6	0.221595	-0.000820586
5	20	mANGPTL6	0.222543	-0.000971774
5	21	mANGPTL6	0.224839	0.000223239
5	22	mANGPTL6	0.228211	0.00249523
5	23	mANGPTL6	0.233983	0.00716702
5	24	mANGPTL6	0.245284	0.0173688
5	25	mANGPTL6	0.266966	0.0379499
5	26	mANGPTL6	0.306868	0.0767518
5	27	mANGPTL6	0.380456	0.14924
5	28	mANGPTL6	0.506167	0.273851
5	29	mANGPTL6	0.703453	0.470038
5	30	mANGPTL6	0.964858	0.730342
5	31	mANGPTL6	1.24011	1.00449
5	32	mANGPTL6	1.46972	1.23301
5	33	mANGPTL6	1.63009	1.39228
5	34	mANGPTL6	1.73226	1.49335
5	35	mANGPTL6	1.79993	1.55991
5	36	mANGPTL6	1.84563	1.60451
5	37	mANGPTL6	1.87825	1.63604
5	38	mANGPTL6	1.90569	1.66237
5	39	mANGPTL6	1.92691	1.68249
5	40	mANGPTL6	1.94088	1.69536
6	1	mANGPTL6	0.0823636	-0.00707296
6	2	mANGPTL6	0.0841621	-0.00583961
6	3	mANGPTL6	0.0888768	-0.00169006
6	4	mANGPTL6	0.0915802	0.000448164
6	5	mANGPTL6	0.0929994	0.00130226
6	6	mANGPTL6	0.0931219	0.00085955
6	7	mANGPTL6	0.0934189	0.000591409
6	8	mANGPTL6	0.0933985	5.84301e-06
6	9	mANGPTL6	0.09336	-0.000597761
6	10	mANGPTL6	0.0945104	-1.25276e-05
6	11	mANGPTL6	0.0953193	0.000231193
6	12	mANGPTL6	0.0958954	0.000242143
6	13	mANGPTL6	0.0963405	0.000122104
6	14	mANGPTL6	0.0968954	0.000111865
6	15	mANGPTL6	0.0972115	-0.000137255
6	16	mANGPTL6	0.0972076	-0.000706311
6	17	mANGPTL6	0.0973723	-0.00110674
6	18	mANGPTL6	0.0979757	-0.00106852
6	19	mANGPTL6	0.0985319	-0.00107747
6	20	mANGPTL6	0.0991906	-0.000983914
6	21	mANGPTL6	0.101109	0.000369504
6	22	mANGPTL6	0.104401	0.00309652
6	23	mANGPTL6	0.110594	0.00872379
6	24	mANGPTL6	0.12131	0.0188746
6	25	mANGPTL6	0.142078	0.0390776
6	26	mANGPTL6	0.181774	0.0782086
6	27	mANGPTL6	0.254392	0.150261
6	28	mANGPTL6	0.380181	0.275486
6	29	mANGPTL6	0.578046	0.472785
6	30	mANGPTL6	0.83914	0.733314
6	31	mANGPTL6	1.11998	1.01359
6	32	mANGPTL6	1.35622	1.24926
6	33	mANGPTL6	1.5187	1.41118
6	34	mANGPTL6	1.6248	1.51672
6	35	mANGPTL6	1.69331	1.58466
6	36	mANGPTL6	1.73921	1.62999
6	37	mANGPTL6	1.7729	1.66312
6	38	mANGPTL6	1.80215	1.6918
6	39	mANGPTL6	1.8246	1.71369
6	40	mANGPTL6	1.837	1.72553
7	1	mANGPTL6	0.10696	-0.00828035
7	2	mANGPTL6	0.109213	-0.00648675
7	3	mANGPTL6	0.112805	-0.00335512
7	4	mANGPTL6	0.114866	-0.00175394
7	5	mANGPTL6	0.116893	-0.000187103
7	6	mANGPTL6	0.117995	0.000455198
7	7	mANGPTL6	0.118504	0.00050409
7	8	mANGPTL6	0.119012	0.000552014
7	9	mANGPTL6	0.119598	0.000678392
7	10	mANGPTL6	0.120292	0.000911776
7	11	mANGPTL6	0.121321	0.00148076
7	12	mANGPTL6	0.121835	0.00153512
7	13	mANGPTL6	0.121807	0.00104751
7	14	mANGPTL6	0.122147	0.000927286
7	15	mANGPTL6	0.122219	0.000539023
7	16	mANGPTL6	0.122479	0.000338917
7	17	mANGPTL6	0.123038	0.000438548
7	18	mANGPTL6	0.123354	0.000293874
7	19	mANGPTL6	0.123365	-0.000154411
7	20	mANGPTL6	0.123431	-0.000548359
7	21	mANGPTL6	0.123983	-0.000456939
7	22	mANGPTL6	0.124542	-0.000357405
7	23	mANGPTL6	0.124629	-0.000730551
7	24	mANGPTL6	0.124915	-0.000904409
7	25	mANGPTL6	0.124928	-0.00135117
7	26	mANGPTL6	0.125508	-0.00123177
7	27	mANGPTL6	0.126311	-0.000888043
7	28	mANGPTL6	0.127738	7.91633e-05
7	29	mANGPTL6	0.130257	0.00213755
7	30	mANGPTL6	0.135629	0.00704983
7	31	mANGPTL6	0.1449	0.0158603
7	32	mANGPTL6	0.161682	0.0321829
7	33	mANGPTL6	0.194311	0.064352
7	34	mANGPTL6	0.254192	0.123772
7	35	mANGPTL6	0.358677	0.227798
7	36	mANGPTL6	0.525984	0.394645
7	37	mANGPTL6	0.757846	0.626047
7	38	mANGPTL6	1.02573	0.893467
7	39	mANGPTL6	1.27217	1.13945
7	40	mANGPTL6	1.44289	1.30971
8	1	mANGPTL6	0.0913918	-0.0060212
8	2	mANGPTL6	0.0930655	-0.00475761
8	3	mANGPTL6	0.0955256	-0.00270766
8	4	mANGPTL6	0.0975734	-0.00106996
8	5	mANGPTL6	0.0990803	2.68228e-05
8	6	mANGPTL6	0.0998	0.0003364
8	7	mANGPTL6	0.100443	0.00056928
8	8	mANGPTL6	0.100835	0.000551591
8	9	mANGPTL6	0.101232	0.000538453
8	10	mANGPTL6	0.102117	0.00101239
8	11	mANGPTL6	0.102623	0.00110881
8	12	mANGPTL6	0.10285	0.000925803
8	13	mANGPTL6	0.102804	0.000469683
8	14	mANGPTL6	0.103393	0.000647921
8	15	mANGPTL6	0.10376	0.000605347
8	16	mANGPTL6	0.104248	0.000682734
8	17	mANGPTL6	0.10446	0.000484516
8	18	mANGPTL6	0.104434	4.89235e-05
8	19	mANGPTL6	0.104218	-0.000577233
8	20	mANGPTL6	0.104768	-0.000437522
8	21	mANGPTL6	0.104796	-0.00081947
8	22	mANGPTL6	0.104716	-0.00130974
8	23	mANGPTL6	0.104965	-0.00147047
8	24	mANGPTL6	0.105821	-0.00102483
8	25	mANGPTL6	0.106192	-0.00106388
8	26	mANGPTL6	0.107012	-0.00065457
8	27	mANGPTL6	0.108571	0.000494934
8	28	mANGPTL6	0.111118	0.00263172
8	29	mANGPTL6	0.115667	0.00677014
8	30	mANGPTL6	0.125111	0.0158043
8	31	mANGPTL6	0.143063	0.033346
8	32	mANGPTL6	0.177437	0.06731
8	33	mANGPTL6	0.240544	0.130007
8	34	mANGPTL6	0.353135	0.242188
8	35	mANGPTL6	0.533951	0.422594
8	36	mANGPTL6	0.783865	0.672098
8	37	mANGPTL6	1.06631	0.954128
8	38	mANGPTL6	1.30719	1.1946
8	39	mANGPTL6	1.48033	1.36734
8	40	mANGPTL6	1.58081	1.4674
9	1	mANGPTL6	0.00307832	-0.0246949
9	2	mANGPTL6	0.0050302	-0.0253845
9	3	mANGPTL6	0.00888713	-0.0241691
9	4	mANGPTL6	0.0128383	-0.0228594
9	5	mANGPTL6	0.0171805	-0.0211588
9	6	mANGPTL6	0.0218782	-0.0191026
9	7	mANGPTL6	0.0264191	-0.0172032
9	8	mANGPTL6	0.0390327	-0.00723118
9	9	mANGPTL6	0.0704273	0.0215219
9	10	mANGPTL6	0.077717	0.0261701
9	11	mANGPTL6	0.0782965	0.0241081
9	12	mANGPTL6	0.0785385	0.0217086
9	13	mANGPTL6	0.0788121	0.0193407
9	14	mANGPTL6	0.0786001	0.0164871
9	15	mANGPTL6	0.0784827	0.0137282
9	16	mANGPTL6	0.079407	0.012011
9	17	mANGPTL6	0.0799326	0.00989512
9	18	mANGPTL6	0.0797603	0.00708128
9	19	mANGPTL6	0.0800864	0.00476587
9	20	mANGPTL6	0.0798597	0.00189763
9	21	mANGPTL6	0.0797883	-0.000815259
9	22	mANGPTL6	0.0800709	-0.00317421
9	23	mANGPTL6	0.0801333	-0.00575335
9	24	mANGPTL6	0.0806311	-0.00789705
9	25	mANGPTL6	0.0810847	-0.010085
9	26	mANGPTL6	0.0819077	-0.0119035
9	27	mANGPTL6	0.0828596	-0.0135931
9	28	mANGPTL6	0.0853243	-0.01377
9	29	mANGPTL6	0.0894457	-0.01229
9	30	mANGPTL6	0.0969729	-0.00740436
9	31	mANGPTL6	0.111127	0.00410787
9	32	mANGPTL6	0.139072	0.0294119
9	33	mANGPTL6	0.190704	0.0784023
9	34	mANGPTL6	0.283036	0.168093
9	35	mANGPTL6	0.4358	0.318215
9	36	mANGPTL6	0.655972	0.535745
9	37	mANGPTL6	0.919842	0.796974
9	38	mANGPTL6	1.17127	1.04576
9	39	mANGPTL6	1.36995	1.2418
9	40	mANGPTL6	1.49351	1.36272
10	1	mANGPTL6	-0.073774	-0.00476285
10	2	mANGPTL6	-0.0725206	-0.00391087
10	3	mANGPTL6	-0.0700572	-0.00184902
10	4	mANGPTL6	-0.0682223	-0.000415631
10	5	mANGPTL6	-0.0670568	0.000348373
10	6	mANGPTL6	-0.0661835	0.000820209
10	7	mANGPTL6	-0.0663198	0.000282343
10	8	mANGPTL6	-0.0660333	0.000167365
10	9	mANGPTL6	-0.0652129	0.000586213
10	10	mANGPTL6	-0.0649865	0.000411116
10	11	mANGPTL6	-0.0646898	0.00030633
10	12	mANGPTL6	-0.0642188	0.000375827
10	13	mANGPTL6	-0.0637687	0.000424449
10	14	mANGPTL6	-0.0633959	0.000395733
10	15	mANGPTL6	-0.0629967	0.000393378
10	16	mANGPTL6	-0.0627953	0.000193306
10	17	mANGPTL6	-0.0623467	0.0002404
10	18	mANGPTL6	-0.0621639	2.17055e-05
10	19	mANGPTL6	-0.0623937	-0.00060958
10	20	mANGPTL6	-0.062306	-0.000923459
10	21	mANGPTL6	-0.0622783	-0.00129717
10	22	mANGPTL6	-0.0619874	-0.00140785
10	23	mANGPTL6	-0.0612648	-0.00108668
10	24	mANGPTL6	-0.060308	-0.000531418
10	25	mANGPTL6	-0.058817	0.000558013
10	26	mANGPTL6	-0.0563775	0.00259604
10	27	mANGPTL6	-0.0520251	0.00654697
10	28	mANGPTL6	-0.0436442	0.0145263
10	29	mANGPTL6	-0.0266554	0.0311136
10	30	mANGPTL6	0.00555741	0.0629249
10	31	mANGPTL6	0.0650357	0.122002
10	32	mANGPTL6	0.170238	0.226802
10	33	mANGPTL6	0.342422	0.398585
10	34	mANGPTL6	0.586894	0.642655
10	35	mANGPTL6	0.873852	0.929212
10	36	mANGPTL6	1.13664	1.1916
10	37	mANGPTL6	1.3338	1.38836
10	38	mANGPTL6	1.46092	1.51508
10	39	mANGPTL6	1.53889	1.59264
10	40	mANGPTL6	1.58581	1.63916
11	1	mANGPTL6	0.0972672	0.000956357
11	2	mANGPTL6	0.096791	0.000195057
11	3	mANGPTL6	0.0967013	-0.000179864
11	4	mANGPTL6	0.0971681	1.81101e-06
11	5	mANGPTL6	0.0973616	-8.98311e-05
11	6	mANGPTL6	0.0978565	0.000119851
11	7	mANGPTL6	0.0986	0.000578173
11	8	mANGPTL6	0.0990885	0.000781559
11	9	mANGPTL6	0.0991791	0.00058695
11	10	mANGPTL6	0.0995064	0.000629023
11	11	mANGPTL6	0.0994436	0.000281052
11	12	mANGPTL6	0.0996052	0.000157558
11	13	mANGPTL6	0.0999193	0.000186452
11	14	mANGPTL6	0.0999978	-2.02424e-05
11	15	mANGPTL6	0.10023	-7.29403e-05
11	16	mANGPTL6	0.10012	-0.000468074
11	17	mANGPTL6	0.100114	-0.000759362
11	18	mANGPTL6	0.100673	-0.00048574
11	19	mANGPTL6	0.100962	-0.00048147
11	20	mANGPTL6	0.1005	-0.00122859
11	21	mANGPTL6	0.100331	-0.00168301
11	22	mANGPTL6	0.100843	-0.00145637
11	23	mANGPTL6	0.101528	-0.00105628
11	24	mANGPTL6	0.102	-0.000870003
11	25	mANGPTL6	0.103146	-9.12572e-06
11	26	mANGPTL6	0.10497	0.00153012
11	27	mANGPTL6	0.107734	0.00400835
11	28	mANGPTL6	0.113863	0.00985295
11	29	mANGPTL6	0.125357	0.0210611
11	30	mANGPTL6	0.147034	0.0424532
11	31	mANGPTL6	0.189053	0.0841869
11	32	mANGPTL6	0.265434	0.160283
11	33	mANGPTL6	0.39489	0.289454
11	34	mANGPTL6	0.5928	0.487079
11	35	mANGPTL6	0.846198	0.740192
11	36	mANGPTL6	1.10463	0.998339
11	37	mANGPTL6	1.32228	1.2157
11	38	mANGPTL6	1.4721	1.36524
11	39	mANGPTL6	1.56861	1.46146
11	40	mANGPTL6	1.62125	1.51382
12	1	mANGPTL6	0.067456	-0.00298468
12	2	mANGPTL6	0.068219	-0.00246114
12	3	mANGPTL6	0.06992	-0.000999546
12	4	mANGPTL6	0.070644	-0.00051505
12	5	mANGPTL6	0.0711645	-0.000233985
12	6	mANGPTL6	0.0718115	0.000173502
12	7	mANGPTL6	0.0728112	0.000933737
12	8	mANGPTL6	0.0729926	0.000875734
12	9	mANGPTL6	0.0732714	0.000915073
12	10	mANGPTL6	0.0732549	0.000659063
12	11	mANGPTL6	0.07333	0.00049474
12	12	mANGPTL6	0.073659	0.000584303
12	13	mANGPTL6	0.0735622	0.000247962
12	14	mANGPTL6	0.0733402	-0.000213446
12	15	mANGPTL6	0.0733282	-0.000464895
12	16	mANGPTL6	0.0739392	-9.34247e-05
12	17	mANGPTL6	0.0743798	0.000107785
12	18	mANGPTL6	0.0745161	4.62453e-06
12	19	mANGPTL6	0.0742119	-0.000539097
12	20	mANGPTL6	0.074	-0.000990423
12	21	mANGPTL6	0.0743026	-0.000927339
12	22	mANGPTL6	0.0743351	-0.00113423
12	23	mANGPTL6	0.0743815	-0.00132733
12	24	mANGPTL6	0.0748304	-0.00111786
12	25	mANGPTL6	0.0752028	-0.000984971
12	26	mANGPTL6	0.0760113	-0.000415895
12	27	mANGPTL6	0.0776175	0.000950839
12	28	mANGPTL6	0.0809163	0.00401013
12	29	mANGPTL6	0.0869731	0.00982747
12	30	mANGPTL6	0.097842	0.020457
12	31	mANGPTL6	0.118118	0.0404932
12	32	mANGPTL6	0.157453	0.079589
12	33	mANGPTL6	0.22859	0.150486
12	34	mANGPTL6	0.351464	0.273121
12	35	mANGPTL6	0.545134	0.466552
12	36	mANGPTL6	0.80102	0.722198
12	37	mANGPTL6	1.07451	0.995445
12	38	mANGPTL6	1.31201	1.23271
12	39	mANGPTL6	1.48238	1.40284
12	40	mANGPTL6	1.58569	1.50591
13	1	hANGPTL6	0.0861831	-0.00701233
13	2	hANGPTL6	0.0882789	-0.0055112
13	3	hANGPTL6	0.0920035	-0.00238118
13	4	hANGPTL6	0.0941664	-0.000812945
13	5	hANGPTL6	0.0952356	-0.000338317
13	6	hANGPTL6	0.0966546	0.000485989
13	7	hANGPTL6	0.0975129	0.000749751
13	8	hANGPTL6	0.0980546	0.000696758
13	9	hANGPTL6	0.0985788	0.000626324
13	10	hANGPTL6	0.0998542	0.00130708
13	11	hANGPTL6	0.100104	0.00096265
13	12	hANGPTL6	0.10056	0.000823887
13	13	hANGPTL6	0.101205	0.000874107
13	14	hANGPTL6	0.101313	0.000387305
13	15	hANGPTL6	0.101341	-0.000179435
13	16	hANGPTL6	0.101974	-0.000140867
13	17	hANGPTL6	0.102476	-0.000233645
13	18	hANGPTL6	0.10233	-0.000974185
13	19	hANGPTL6	0.102867	-0.00103137
13	20	hANGPTL6	0.103437	-0.00105611
13	21	hANGPTL6	0.104234	-0.000854406
13	22	hANGPTL6	0.105094	-0.000588745
13	23	hANGPTL6	0.106088	-0.000188891
13	24	hANGPTL6	0.108738	0.00186624
13	25	hANGPTL6	0.114324	0.00685734
13	26	hANGPTL6	0.125152	0.0170911
13	27	hANGPTL6	0.145424	0.0367686
13	28	hANGPTL6	0.183502	0.0742513
13	29	hANGPTL6	0.252247	0.142402
13	30	hANGPTL6	0.372799	0.262359
13	31	hANGPTL6	0.560434	0.4494
13	32	hANGPTL6	0.808742	0.697113
13	33	hANGPTL6	1.07981	0.967587
13	34	hANGPTL6	1.31406	1.20124
13	35	hANGPTL6	1.48088	1.36747
13	36	hANGPTL6	1.58654	1.47253
13	37	hANGPTL6	1.65262	1.53802
13	38	hANGPTL6	1.69677	1.58158
13	39	hANGPTL6	1.72975	1.61396
13	40	hANGPTL6	1.75049	1.63411
14	1	hANGPTL6	0.0589115	-0.00365841
14	2	hANGPTL6	0.060481	-0.00259309
14	3	hANGPTL6	0.0625447	-0.00103357
14	4	hANGPTL6	0.0635157	-0.000566782
14	5	hANGPTL6	0.0644465	-0.000140233
14	6	hANGPTL6	0.0654308	0.000339886
14	7	hANGPTL6	0.0664307	0.000835555
14	8	hANGPTL6	0.0668322	0.000732897
14	9	hANGPTL6	0.0674802	0.000876614
14	10	hANGPTL6	0.0679583	0.000850556
14	11	hANGPTL6	0.0680533	0.000441306
14	12	hANGPTL6	0.0684754	0.000359279
14	13	hANGPTL6	0.0688007	0.000180349
14	14	hANGPTL6	0.0690064	-0.000118155
14	15	hANGPTL6	0.0694022	-0.000226595
14	16	hANGPTL6	0.0695941	-0.00053892
14	17	hANGPTL6	0.0698072	-0.00083004
14	18	hANGPTL6	0.0702304	-0.000911017
14	19	hANGPTL6	0.0705173	-0.00112826
14	20	hANGPTL6	0.0709355	-0.00121432
14	21	hANGPTL6	0.0713735	-0.00128054
14	22	hANGPTL6	0.0727119	-0.00044637
14	23	hANGPTL6	0.0742712	0.0006088
14	24	hANGPTL6	0.0773762	0.00320957
14	25	hANGPTL6	0.0835095	0.00883868
14	26	hANGPTL6	0.0945699	0.0193948
14	27	hANGPTL6	0.115642	0.0399626
14	28	hANGPTL6	0.156443	0.0802597
14	29	hANGPTL6	0.229573	0.152885
14	30	hANGPTL6	0.356266	0.279074
14	31	hANGPTL6	0.551543	0.473847
14	32	hANGPTL6	0.804744	0.726544
14	33	hANGPTL6	1.07185	0.993146
14	34	hANGPTL6	1.30087	1.22166
14	35	hANGPTL6	1.46121	1.3815
14	36	hANGPTL6	1.56154	1.48133
14	37	hANGPTL6	1.6268	1.54607
14	38	hANGPTL6	1.6688	1.58757
14	39	hANGPTL6	1.69889	1.61717
14	40	hANGPTL6	1.71783	1.6356
15	1	hANGPTL6	0.0813938	-0.00681635
15	2	hANGPTL6	0.0835055	-0.00523973
15	3	hANGPTL6	0.0872506	-0.00202971
15	4	hANGPTL6	0.0888199	-0.000995585
15	5	hANGPTL6	0.0907035	0.000352969
15	6	hANGPTL6	0.0914377	0.000552122
15	7	hANGPTL6	0.0920362	0.000615526
15	8	hANGPTL6	0.0927045	0.000748726
15	9	hANGPTL6	0.0933269	0.000836002
15	10	hANGPTL6	0.0938464	0.00082037
15	11	hANGPTL6	0.094506	0.00094492
15	12	hANGPTL6	0.0946536	0.000557363
15	13	hANGPTL6	0.094913	0.000281683
15	14	hANGPTL6	0.0954883	0.000321885
15	15	hANGPTL6	0.0954546	-0.000246856
15	16	hANGPTL6	0.0962204	-1.61789e-05
15	17	hANGPTL6	0.0962501	-0.00052153
15	18	hANGPTL6	0.0965651	-0.000741629
15	19	hANGPTL6	0.0968689	-0.000972985
15	20	hANGPTL6	0.0971179	-0.00125907
15	21	hANGPTL6	0.0976428	-0.0012692
15	22	hANGPTL6	0.0984491	-0.000998058
15	23	hANGPTL6	0.100271	0.000289118
15	24	hANGPTL6	0.103247	0.00273012
15	25	hANGPTL6	0.108535	0.00748273
15	26	hANGPTL6	0.119661	0.0180736
15	27	hANGPTL6	0.140636	0.0385134
15	28	hANGPTL6	0.179747	0.0770889
15	29	hANGPTL6	0.250422	0.147229
15	30	hANGPTL6	0.371829	0.268101
15	31	hANGPTL6	0.559197	0.454934
15	32	hANGPTL6	0.805515	0.700717
15	33	hANGPTL6	1.06796	0.962631
15	34	hANGPTL6	1.29283	1.18696
15	35	hANGPTL6	1.45345	1.34704
15	36	hANGPTL6	1.55459	1.44765
15	37	hANGPTL6	1.61973	1.51226
15	38	hANGPTL6	1.66446	1.55645
15	39	hANGPTL6	1.69451	1.58597
15	40	hANGPTL6	1.71419	1.60511
16	1	hANGPTL6	0.0620656	-0.00647044
16	2	hANGPTL6	0.0644689	-0.00480558
16	3	hANGPTL6	0.0679284	-0.00208454
16	4	hANGPTL6	0.0689381	-0.00181331
16	5	hANGPTL6	0.0707823	-0.000707538
16	6	hANGPTL6	0.0722088	-1.94763e-05
16	7	hANGPTL6	0.073027	6.02904e-05
16	8	hANGPTL6	0.0744406	0.000735441
16	9	hANGPTL6	0.0753496	0.000906
16	10	hANGPTL6	0.0762807	0.00109858
16	11	hANGPTL6	0.0769492	0.00102865
16	12	hANGPTL6	0.0780087	0.00134972
16	13	hANGPTL6	0.0785519	0.00115449
16	14	hANGPTL6	0.0791186	0.000982685
16	15	hANGPTL6	0.0800876	0.0012133
16	16	hANGPTL6	0.0806685	0.00105568
16	17	hANGPTL6	0.0807899	0.000438632
16	18	hANGPTL6	0.0809288	-0.000160931
16	19	hANGPTL6	0.0814494	-0.000378703
16	20	hANGPTL6	0.0816788	-0.000887793
16	21	hANGPTL6	0.081902	-0.00140303
16	22	hANGPTL6	0.0824828	-0.00156068
16	23	hANGPTL6	0.0833226	-0.00145935
16	24	hANGPTL6	0.0840268	-0.00149354
16	25	hANGPTL6	0.0854426	-0.000816263
16	26	hANGPTL6	0.0872085	0.000211225
16	27	hANGPTL6	0.0902862	0.00255045
16	28	hANGPTL6	0.0957895	0.00731535
16	29	hANGPTL6	0.105765	0.0165527
16	30	hANGPTL6	0.124841	0.0348903
16	31	hANGPTL6	0.161235	0.0705452
16	32	hANGPTL6	0.228341	0.136913
16	33	hANGPTL6	0.344058	0.251892
16	34	hANGPTL6	0.525779	0.432874
16	35	hANGPTL6	0.768158	0.674515
16	36	hANGPTL6	1.03385	0.939467
16	37	hANGPTL6	1.26974	1.17462
16	38	hANGPTL6	1.43947	1.34361
16	39	hANGPTL6	1.55034	1.45375
16	40	hANGPTL6	1.6151	1.51776
17	1	hANGPTL6	0.085974	-0.0141772
17	2	hANGPTL6	0.0903621	-0.0106028
17	3	hANGPTL6	0.0975383	-0.00424047
17	4	hANGPTL6	0.101034	-0.00155807
17	5	hANGPTL6	0.103011	-0.00039532
17	6	hANGPTL6	0.104453	0.00023278
17	7	hANGPTL6	0.105468	0.000434333
17	8	hANGPTL6	0.106952	0.00110413
17	9	hANGPTL6	0.108258	0.00159605
17	10	hANGPTL6	0.108909	0.00143326
17	11	hANGPTL6	0.110147	0.00185746
17	12	hANGPTL6	0.110785	0.00168206
17	13	hANGPTL6	0.111326	0.00140871
17	14	hANGPTL6	0.111088	0.000357246
17	15	hANGPTL6	0.112025	0.000480516
17	16	hANGPTL6	0.113076	0.000718063
17	17	hANGPTL6	0.113511	0.000338606
17	18	hANGPTL6	0.113811	-0.000175052
17	19	hANGPTL6	0.113926	-0.000873796
17	20	hANGPTL6	0.114437	-0.00117671
17	21	hANGPTL6	0.114942	-0.00148539
17	22	hANGPTL6	0.11567	-0.0015712
17	23	hANGPTL6	0.116434	-0.00162067
17	24	hANGPTL6	0.118304	-0.000564506
17	25	hANGPTL6	0.1217	0.00201796
17	26	hANGPTL6	0.127277	0.0067805
17	27	hANGPTL6	0.137888	0.0165779
17	28	hANGPTL6	0.158537	0.0364135
17	29	hANGPTL6	0.197171	0.0742335
17	30	hANGPTL6	0.267154	0.143403
17	31	hANGPTL6	0.387748	0.263183
17	32	hANGPTL6	0.575607	0.450228
17	33	hANGPTL6	0.822877	0.696684
17	34	hANGPTL6	1.08783	0.960819
17	35	hANGPTL6	1.31271	1.18489
17	36	hANGPTL6	1.47563	1.347
17	37	hANGPTL6	1.57752	1.44808
17	38	hANGPTL6	1.64232	1.51206
17	39	hANGPTL6	1.68736	1.55628
17	40	hANGPTL6	1.71846	1.58657
18	1	hANGPTL6	0.0605044	-0.0237148
18	2	hANGPTL6	0.0638072	-0.0218239
18	3	hANGPTL6	0.0708856	-0.0161576
18	4	hANGPTL6	0.0762247	-0.0122305
18	5	hANGPTL6	0.0808065	-0.00906062
18	6	hANGPTL6	0.0888853	-0.00239388
18	7	hANGPTL6	0.0992757	0.00658455
18	8	hANGPTL6	0.102747	0.00864419
18	9	hANGPTL6	0.104355	0.00883975
18	10	hANGPTL6	0.105482	0.00855453
18	11	hANGPTL6	0.105849	0.00750958
18	12	hANGPTL6	0.105952	0.00620079
18	13	hANGPTL6	0.106559	0.00539556
18	14	hANGPTL6	0.107062	0.00448701
18	15	hANGPTL6	0.107693	0.00370606
18	16	hANGPTL6	0.107407	0.00200816
18	17	hANGPTL6	0.107851	0.00103983
18	18	hANGPTL6	0.108085	-0.000138248
18	19	hANGPTL6	0.108156	-0.00147877
18	20	hANGPTL6	0.108667	-0.00237974
18	21	hANGPTL6	0.109344	-0.00311526
18	22	hANGPTL6	0.109851	-0.00401985
18	23	hANGPTL6	0.11095	-0.0043332
18	24	hANGPTL6	0.112097	-0.00459793
18	25	hANGPTL6	0.115043	-0.00306441
18	26	hANGPTL6	0.120341	0.000822135
18	27	hANGPTL6	0.1304	0.00946925
18	28	hANGPTL6	0.148296	0.0259534
18	29	hANGPTL6	0.182386	0.0586307
18	30	hANGPTL6	0.246117	0.12095
18	31	hANGPTL6	0.35726	0.230681
18	32	hANGPTL6	0.534282	0.406291
18	33	hANGPTL6	0.779654	0.650251
18	34	hANGPTL6	1.05452	0.923709
18	35	hANGPTL6	1.3002	1.16798
18	36	hANGPTL6	1.48348	1.34984
18	37	hANGPTL6	1.60311	1.46806
18	38	hANGPTL6	1.67708	1.54062
18	39	hANGPTL6	1.72664	1.58877
18	40	hANGPTL6	1.75855	1.61926
19	1	hANGPTL6	0.0893829	-0.00773949
19	2	hANGPTL6	0.0919064	-0.00580412
19	3	hANGPTL6	0.095672	-0.00262668
19	4	hANGPTL6	0.0980836	-0.000803215
19	5	hANGPTL6	0.0993614	-0.000113568
19	6	hANGPTL6	0.100877	0.000814155
19	7	hANGPTL6	0.101907	0.00125538
19	8	hANGPTL6	0.101767	0.000527134
19	9	hANGPTL6	0.102802	0.000974518
19	10	hANGPTL6	0.103275	0.000858914
19	11	hANGPTL6	0.103458	0.000453981
19	12	hANGPTL6	0.104552	0.000959837
19	13	hANGPTL6	0.104917	0.000737295
19	14	hANGPTL6	0.105314	0.000545374
19	15	hANGPTL6	0.105698	0.000341034
19	16	hANGPTL6	0.105807	-0.000138084
19	17	hANGPTL6	0.105691	-0.000842277
19	18	hANGPTL6	0.106267	-0.000854095
19	19	hANGPTL6	0.106803	-0.000905944
19	20	hANGPTL6	0.107433	-0.000864349
19	21	hANGPTL6	0.1079	-0.000985757
19	22	hANGPTL6	0.108273	-0.00120069
19	23	hANGPTL6	0.109399	-0.000662531
19	24	hANGPTL6	0.110191	-0.000458386
19	25	hANGPTL6	0.111604	0.000365863
19	26	hANGPTL6	0.114448	0.0026221
19	27	hANGPTL6	0.119832	0.00741737
19	28	hANGPTL6	0.130288	0.0172855
19	29	hANGPTL6	0.15097	0.0373796
19	30	hANGPTL6	0.188881	0.0747027
19	31	hANGPTL6	0.258594	0.143827
19	32	hANGPTL6	0.379289	0.263934
19	33	hANGPTL6	0.568327	0.452384
19	34	hANGPTL6	0.820873	0.704342
19	35	hANGPTL6	1.09535	0.978228
19	36	hANGPTL6	1.33455	1.21685
19	37	hANGPTL6	1.50446	1.38616
19	38	hANGPTL6	1.61299	1.4941
19	39	hANGPTL6	1.68093	1.56146
19	40	hANGPTL6	1.72462	1.60456
20	1	hANGPTL6	0.126855	-0.00753345
20	2	hANGPTL6	0.129306	-0.00566411
20	3	hANGPTL6	0.132816	-0.00273664
20	4	hANGPTL6	0.134993	-0.00114221
20	5	hANGPTL6	0.136763	4.58312e-05
20	6	hANGPTL6	0.137709	0.000409379
20	7	hANGPTL6	0.138943	0.00106123
20	8	hANGPTL6	0.139135	0.00067029
20	9	hANGPTL6	0.140044	0.000996734
20	10	hANGPTL6	0.140545	0.000915243
20	11	hANGPTL6	0.140925	0.000713694
20	12	hANGPTL6	0.141831	0.00103704
20	13	hANGPTL6	0.142383	0.00100696
20	14	hANGPTL6	0.14216	0.000200762
20	15	hANGPTL6	0.142702	0.000161233
20	16	hANGPTL6	0.143249	0.000125489
20	17	hANGPTL6	0.143259	-0.000446563
20	18	hANGPTL6	0.144281	-7.42219e-06
20	19	hANGPTL6	0.144375	-0.000495476
20	20	hANGPTL6	0.144281	-0.0011721
20	21	hANGPTL6	0.144416	-0.00161914
20	22	hANGPTL6	0.145311	-0.00130713
20	23	hANGPTL6	0.14595	-0.00125041
20	24	hANGPTL6	0.147956	0.000174022
20	25	hANGPTL6	0.151024	0.0026592
20	26	hANGPTL6	0.15658	0.00763289
20	27	hANGPTL6	0.167185	0.0176554
20	28	hANGPTL6	0.187002	0.0368899
20	29	hANGPTL6	0.224275	0.0735805
20	30	hANGPTL6	0.294117	0.14284
20	31	hANGPTL6	0.413491	0.261632
20	32	hANGPTL6	0.602329	0.449888
20	33	hANGPTL6	0.850848	0.697824
20	34	hANGPTL6	1.12003	0.966423
20	35	hANGPTL6	1.35572	1.20153
20	36	hANGPTL6	1.52297	1.3682
20	37	hANGPTL6	1.62754	1.47219
20	38	hANGPTL6	1.692	1.53607
20	39	hANGPTL6	1.73379	1.57727
20	40	hANGPTL6	1.75725	1.60015
21	1	hANGPTL6	0.0753138	-0.00903097
21	2	hANGPTL6	0.0779222	-0.00702457
21	3	hANGPTL6	0.0822001	-0.00334863
21	4	hANGPTL6	0.0842596	-0.00189101
21	5	hANGPTL6	0.0859461	-0.000806423
21	6	hANGPTL6	0.0878663	0.000511781
21	7	hANGPTL6	0.0890706	0.00111416
21	8	hANGPTL6	0.0899378	0.00137942
21	9	hANGPTL6	0.0905784	0.00141805
21	10	hANGPTL6	0.0906192	0.000856924
21	11	hANGPTL6	0.0910613	0.000697074
21	12	hANGPTL6	0.0920564	0.00109021
21	13	hANGPTL6	0.0926726	0.00110446
21	14	hANGPTL6	0.0932242	0.00105416
21	15	hANGPTL6	0.0938814	0.00110934
21	16	hANGPTL6	0.0936331	0.000259172
21	17	hANGPTL6	0.0937894	-0.00018652
21	18	hANGPTL6	0.0942993	-0.000278569
21	19	hANGPTL6	0.0945746	-0.000605155
21	20	hANGPTL6	0.094865	-0.000916736
21	21	hANGPTL6	0.0954188	-0.000964849
21	22	hANGPTL6	0.0959567	-0.00102897
21	23	hANGPTL6	0.0962336	-0.00135397
21	24	hANGPTL6	0.0980314	-0.000158093
21	25	hANGPTL6	0.0997356	0.000944171
21	26	hANGPTL6	0.103903	0.00450946
21	27	hANGPTL6	0.111791	0.0117958
21	28	hANGPTL6	0.12699	0.026393
21	29	hANGPTL6	0.155542	0.0543431
21	30	hANGPTL6	0.209059	0.107258
21	31	hANGPTL6	0.304044	0.201641
21	32	hANGPTL6	0.460206	0.357201
21	33	hANGPTL6	0.686752	0.583145
21	34	hANGPTL6	0.955876	0.851667
21	35	hANGPTL6	1.21046	1.10565
21	36	hANGPTL6	1.40795	1.30254
21	37	hANGPTL6	1.53783	1.43182
21	38	hANGPTL6	1.61877	1.51215
21	39	hANGPTL6	1.6702	1.56299
21	40	hANGPTL6	1.70145	1.59363
22	1	hANGPTL6	0.050705	-0.00876136
22	2	hANGPTL6	0.0529936	-0.00701047
22	3	hANGPTL6	0.0573865	-0.00315538
22	4	hANGPTL6	0.0595715	-0.00150807
22	5	hANGPTL6	0.0611782	-0.000439164
22	6	hANGPTL6	0.0628223	0.000667159
22	7	hANGPTL6	0.0633152	0.000622323
22	8	hANGPTL6	0.0641406	0.000909961
22	9	hANGPTL6	0.0652543	0.00148593
22	10	hANGPTL6	0.0655765	0.00127044
22	11	hANGPTL6	0.066006	0.00116221
22	12	hANGPTL6	0.0665865	0.00120489
22	13	hANGPTL6	0.0665191	0.000599753
22	14	hANGPTL6	0.0667938	0.000336726
22	15	hANGPTL6	0.0675349	0.000540091
22	16	hANGPTL6	0.0679934	0.000460848
22	17	hANGPTL6	0.0680184	-5.19153e-05
22	18	hANGPTL6	0.0678876	-0.000720432
22	19	hANGPTL6	0.0682569	-0.000888897
22	20	hANGPTL6	0.0686291	-0.00105442
22	21	hANGPTL6	0.0691601	-0.00106115
22	22	hANGPTL6	0.0697619	-0.000997143
22	23	hANGPTL6	0.0705494	-0.000747369
22	24	hANGPTL6	0.0719374	0.000102922
22	25	hANGPTL6	0.0736329	0.00126068
22	26	hANGPTL6	0.0779928	0.00508276
22	27	hANGPTL6	0.086023	0.0125752
22	28	hANGPTL6	0.101835	0.0278493
22	29	hANGPTL6	0.13126	0.0567367
22	30	hANGPTL6	0.186425	0.111364
22	31	hANGPTL6	0.283442	0.207844
22	32	hANGPTL6	0.44267	0.366533
22	33	hANGPTL6	0.66854	0.591865
22	34	hANGPTL6	0.934923	0.857711
22	35	hANGPTL6	1.18393	1.10618
22	36	hANGPTL6	1.37524	1.29695
22	37	hANGPTL6	1.49983	1.42101
22	38	hANGPTL6	1.58033	1.50097
22	39	hANGPTL6	1.63042	1.55052
22	40	hANGPTL6	1.66301	1.58258
23	1	hANGPTL6	0.104077	-0.00744048
23	2	hANGPTL6	0.106645	-0.00553002
23	3	hANGPTL6	0.110829	-0.00200391
23	4	hANGPTL6	0.113112	-0.000377979
23	5	hANGPTL6	0.114485	0.000337429
23	6	hANGPTL6	0.115241	0.000435027
23	7	hANGPTL6	0.116046	0.000582827
23	8	hANGPTL6	0.116789	0.000667818
23	9	hANGPTL6	0.117789	0.0010102
23	10	hANGPTL6	0.118109	0.000672406
23	11	hANGPTL6	0.118634	0.00053952
23	12	hANGPTL6	0.119115	0.000363153
23	13	hANGPTL6	0.119755	0.000345438
23	14	hANGPTL6	0.121024	0.000956307
23	15	hANGPTL6	0.120795	6.9497e-05
23	16	hANGPTL6	0.120629	-0.000753953
23	17	hANGPTL6	0.121725	-0.00031567
23	18	hANGPTL6	0.122418	-0.000280798
23	19	hANGPTL6	0.122753	-0.000603465
23	20	hANGPTL6	0.122764	-0.0012499
23	21	hANGPTL6	0.123272	-0.00139968
23	22	hANGPTL6	0.123873	-0.00145613
23	23	hANGPTL6	0.124554	-0.00143283
23	24	hANGPTL6	0.125825	-0.00081913
23	25	hANGPTL6	0.128098	0.000795257
23	26	hANGPTL6	0.131879	0.00391858
23	27	hANGPTL6	0.138943	0.0103255
23	28	hANGPTL6	0.151925	0.0226492
23	29	hANGPTL6	0.178117	0.0481841
23	30	hANGPTL6	0.227836	0.097245
23	31	hANGPTL6	0.315929	0.184681
23	32	hANGPTL6	0.460566	0.32866
23	33	hANGPTL6	0.67235	0.539786
23	34	hANGPTL6	0.931575	0.798354
23	35	hANGPTL6	1.18217	1.04829
23	36	hANGPTL6	1.37625	1.24171
23	37	hANGPTL6	1.50428	1.36909
23	38	hANGPTL6	1.58374	1.44789
23	39	hANGPTL6	1.63442	1.49791
23	40	hANGPTL6	1.66885	1.53168
24	1	hANGPTL6	0.00809898	-0.00630901
24	2	hANGPTL6	0.00980587	-0.00513454
24	3	hANGPTL6	0.0130695	-0.00240329
24	4	hANGPTL6	0.0150975	-0.00090778
24	5	hANGPTL6	0.0166393	0.000101695
24	6	hANGPTL6	0.01702	-5.00149e-05
24	7	hANGPTL6	0.0178473	0.000244848
24	8	hANGPTL6	0.0187352	0.000600304
24	9	hANGPTL6	0.0195546	0.000887271
24	10	hANGPTL6	0.0209236	0.00172392
24	11	hANGPTL6	0.0213984	0.00166633
24	12	hANGPTL6	0.021342	0.00107745
24	13	hANGPTL6	0.0213038	0.000506816
24	14	hANGPTL6	0.0213269	-2.44043e-06
24	15	hANGPTL6	0.0216936	-0.000168199
24	16	hANGPTL6	0.0223551	-3.90799e-05
24	17	hANGPTL6	0.0224945	-0.0004321
24	18	hANGPTL6	0.0229435	-0.000515494
24	19	hANGPTL6	0.0233344	-0.000656998
24	20	hANGPTL6	0.0234049	-0.00111891
24	21	hANGPTL6	0.0240539	-0.00100232
24	22	hANGPTL6	0.0245059	-0.00108272
24	23	hANGPTL6	0.0253369	-0.000784156
24	24	hANGPTL6	0.0269091	0.000255599
24	25	hANGPTL6	0.0292852	0.00209928
24	26	hANGPTL6	0.0342084	0.00649004
24	27	hANGPTL6	0.0429914	0.0147407
24	28	hANGPTL6	0.058982	0.0301989
24	29	hANGPTL6	0.0891335	0.0598179
24	30	hANGPTL6	0.147267	0.117419
24	31	hANGPTL6	0.249523	0.219143
24	32	hANGPTL6	0.415338	0.384425
24	33	hANGPTL6	0.646814	0.615369
24	34	hANGPTL6	0.915199	0.883221
24	35	hANGPTL6	1.16225	1.12974
24	36	hANGPTL6	1.35137	1.31832
24	37	hANGPTL6	1.47605	1.44248
24	38	hANGPTL6	1.54906	1.51495
24	39	hANGPTL6	1.59273	1.55809
24	40	hANGPTL6	1.62458	1.5894
25	1	mPALM2	0.219228	-0.0213062
25	2	mPALM2	0.22614	-0.0152744
25	3	mPALM2	0.235903	-0.00639016
25	4	mPALM2	0.24033	-0.00284328
25	5	mPALM2	0.243089	-0.000963746
25	6	mPALM2	0.246231	0.00129894
25	7	mPALM2	0.24827	0.00245764
25	8	mPALM2	0.249272	0.00258005
25	9	mPALM2	0.249651	0.00207957
25	10	mPALM2	0.250683	0.0022317
25	11	mPALM2	0.252051	0.00272002
25	12	mPALM2	0.252317	0.00210707
25	13	mPALM2	0.252288	0.00119796
25	14	mPALM2	0.251618	-0.000351235
25	15	mPALM2	0.252441	-0.000408499
25	16	mPALM2	0.254141	0.000412155
25	17	mPALM2	0.254951	0.000342553
25	18	mPALM2	0.255077	-0.000411221
25	19	mPALM2	0.254948	-0.00141936
25	20	mPALM2	0.255704	-0.00154365
25	21	mPALM2	0.256614	-0.00151281
25	22	mPALM2	0.257821	-0.00118557
25	23	mPALM2	0.258501	-0.00138553
25	24	mPALM2	0.259646	-0.00111958
25	25	mPALM2	0.2607	-0.000944955
25	26	mPALM2	0.262932	0.000406805
25	27	mPALM2	0.26605	0.00264513
25	28	mPALM2	0.270925	0.00664065
25	29	mPALM2	0.280792	0.0156276
25	30	mPALM2	0.29984	0.033796
25	31	mPALM2	0.335352	0.0684293
25	32	mPALM2	0.400764	0.132962
25	33	mPALM2	0.51559	0.246907
25	34	mPALM2	0.696315	0.426753
25	35	mPALM2	0.939488	0.669046
25	36	mPALM2	1.2094	0.938084
25	37	mPALM2	1.44273	1.17053
25	38	mPALM2	1.61371	1.34063
25	39	mPALM2	1.72682	1.45286
25	40	mPALM2	1.79253	1.51769
26	1	mPALM2	0.0543237	-0.00748617
26	2	mPALM2	0.0561922	-0.00638613
26	3	mPALM2	0.0597714	-0.00357533
26	4	mPALM2	0.062589	-0.00152616
26	5	mPALM2	0.0643345	-0.000549105
26	6	mPALM2	0.0659922	0.000340135
26	7	mPALM2	0.0673369	0.000916376
26	8	mPALM2	0.0682714	0.00108241
26	9	mPALM2	0.0695476	0.0015902
26	10	mPALM2	0.0701712	0.0014454
26	11	mPALM2	0.0707431	0.00124882
26	12	mPALM2	0.0712997	0.00103699
26	13	mPALM2	0.072132	0.00110079
26	14	mPALM2	0.0726943	0.000894692
26	15	mPALM2	0.0734407	0.000872681
26	16	mPALM2	0.0736833	0.000346781
26	17	mPALM2	0.0737875	-0.000317462
26	18	mPALM2	0.0747814	-9.19796e-05
26	19	mPALM2	0.0748092	-0.000832636
26	20	mPALM2	0.0754276	-0.000982647
26	21	mPALM2	0.0757726	-0.00140613
26	22	mPALM2	0.0767232	-0.00122389
26	23	mPALM2	0.0772646	-0.00145095
26	24	mPALM2	0.0779899	-0.00149408
26	25	mPALM2	0.0796755	-0.000576956
26	26	mPALM2	0.0814527	0.000431836
26	27	mPALM2	0.0845095	0.00272021
26	28	mPALM2	0.0898776	0.00731986
26	29	mPALM2	0.100294	0.0169682
26	30	mPALM2	0.120525	0.03643
26	31	mPALM2	0.159213	0.0743496
26	32	mPALM2	0.229316	0.143685
26	33	mPALM2	0.352467	0.266067
26	34	mPALM2	0.546765	0.459596
26	35	mPALM2	0.810394	0.722457
26	36	mPALM2	1.09946	1.01076
26	37	mPALM2	1.35047	1.261
26	38	mPALM2	1.53182	1.44157
26	39	mPALM2	1.65335	1.56234
26	40	mPALM2	1.72271	1.63093
27	1	mPALM2	0.11205	-0.00932673
27	2	mPALM2	0.115052	-0.007054
27	3	mPALM2	0.119447	-0.00338819
27	4	mPALM2	0.122655	-0.000908898
27	5	mPALM2	0.12432	2.79116e-05
27	6	mPALM2	0.125565	0.000543503
27	7	mPALM2	0.127271	0.001521
27	8	mPALM2	0.128026	0.00154636
27	9	mPALM2	0.128045	0.00083682
27	10	mPALM2	0.129003	0.00106561
27	11	mPALM2	0.129809	0.00114349
27	12	mPALM2	0.130289	0.000894282
27	13	mPALM2	0.131025	0.000901163
27	14	mPALM2	0.131302	0.000449132
27	15	mPALM2	0.131882	0.000300802
27	16	mPALM2	0.131852	-0.000458029
27	17	mPALM2	0.132297	-0.000742511
27	18	mPALM2	0.133116	-0.000651916
27	19	mPALM2	0.133562	-0.000934595
27	20	mPALM2	0.13379	-0.00143565
27	21	mPALM2	0.134238	-0.00171657
27	22	mPALM2	0.134644	-0.00203932
27	23	mPALM2	0.136233	-0.00117945
27	24	mPALM2	0.137804	-0.000337838
27	25	mPALM2	0.139832	0.000961286
27	26	mPALM2	0.143201	0.0036016
27	27	mPALM2	0.148351	0.00802292
27	28	mPALM2	0.159291	0.0182338
27	29	mPALM2	0.180501	0.0387149
27	30	mPALM2	0.220093	0.0775781
27	31	mPALM2	0.2925	0.149257
27	32	mPALM2	0.418359	0.274386
27	33	mPALM2	0.61598	0.471279
27	34	mPALM2	0.88009	0.73466
27	35	mPALM2	1.16869	1.02253
27	36	mPALM2	1.41829	1.2714
27	37	mPALM2	1.59817	1.45055
27	38	mPALM2	1.71432	1.56597
27	39	mPALM2	1.78922	1.64014
27	40	mPALM2	1.83045	1.68064
28	1	mPALM2	0.640124	-0.0645301
28	2	mPALM2	0.651536	-0.0565361
28	3	mPALM2	0.676306	-0.0351836
28	4	mPALM2	0.696148	-0.01876
28	5	mPALM2	0.71071	-0.00761575
28	6	mPALM2	0.72027	-0.00147361
28	7	mPALM2	0.729784	0.0046228
28	8	mPALM2	0.736694	0.00811521
28	9	mPALM2	0.743523	0.0115268
28	10	mPALM2	0.747008	0.0115943
28	11	mPALM2	0.750831	0.0119995
28	12	mPALM2	0.755181	0.0129314
28	13	mPALM2	0.758128	0.0124608
28	14	mPALM2	0.760755	0.0116703
28	15	mPALM2	0.762333	0.00983031
28	16	mPALM2	0.762514	0.00659347
28	17	mPALM2	0.764088	0.00475001
28	18	mPALM2	0.765064	0.00230747
28	19	mPALM2	0.766883	0.00070887
28	20	mPALM2	0.768018	-0.0015734
28	21	mPALM2	0.768883	-0.00412627
28	22	mPALM2	0.770013	-0.00641366
28	23	mPALM2	0.771397	-0.00844821
28	24	mPALM2	0.775073	-0.00818977
28	25	mPALM2	0.7768	-0.00987986
28	26	mPALM2	0.782651	-0.00744704
28	27	mPALM2	0.792486	-0.00102983
28	28	mPALM2	0.807769	0.0108352
28	29	mPALM2	0.84141	0.0410588
28	30	mPALM2	0.901333	0.097564
28	31	mPALM2	1.00616	0.198975
28	32	mPALM2	1.16657	0.355965
28	33	mPALM2	1.37174	0.55772
28	34	mPALM2	1.58521	0.767767
28	35	mPALM2	1.76333	0.942476
28	36	mPALM2	1.88963	1.06536
28	37	mPALM2	1.9692	1.14151
28	38	mPALM2	2.02246	1.19135
28	39	mPALM2	2.05917	1.22465
28	40	mPALM2	2.07865	1.2407
29	1	mPALM2	0.0773196	-0.0126991
29	2	mPALM2	0.0815414	-0.00932951
29	3	mPALM2	0.0873022	-0.00442081
29	4	mPALM2	0.0911261	-0.00144905
29	5	mPALM2	0.093655	0.000227623
29	6	mPALM2	0.0950768	0.000797357
29	7	mPALM2	0.0964952	0.00136353
29	8	mPALM2	0.0978117	0.00182792
29	9	mPALM2	0.0982888	0.00145289
29	10	mPALM2	0.09865	0.000961892
29	11	mPALM2	0.0993802	0.000839965
29	12	mPALM2	0.100643	0.00125105
29	13	mPALM2	0.101336	0.00109158
29	14	mPALM2	0.102084	0.000986765
29	15	mPALM2	0.102695	0.00074601
29	16	mPALM2	0.102398	-0.000402763
29	17	mPALM2	0.102793	-0.000860688
29	18	mPALM2	0.103624	-0.000881532
29	19	mPALM2	0.104109	-0.0012482
29	20	mPALM2	0.104635	-0.00157449
29	21	mPALM2	0.105436	-0.00162575
29	22	mPALM2	0.106602	-0.00131167
29	23	mPALM2	0.107579	-0.00118717
29	24	mPALM2	0.10973	0.000111379
29	25	mPALM2	0.113775	0.00330418
29	26	mPALM2	0.120264	0.00894137
29	27	mPALM2	0.13191	0.0197355
29	28	mPALM2	0.15478	0.0417534
29	29	mPALM2	0.195999	0.0821195
29	30	mPALM2	0.272978	0.158247
29	31	mPALM2	0.405425	0.289841
29	32	mPALM2	0.609718	0.493282
29	33	mPALM2	0.879892	0.762604
29	34	mPALM2	1.16614	1.048
29	35	mPALM2	1.40329	1.28429
29	36	mPALM2	1.56963	1.44979
29	37	mPALM2	1.67892	1.55822
29	38	mPALM2	1.75047	1.62892
29	39	mPALM2	1.79813	1.67573
29	40	mPALM2	1.82733	1.70408
30	1	mPALM2	0.710428	-0.134448
30	2	mPALM2	0.744435	-0.105614
30	3	mPALM2	0.802068	-0.053152
30	4	mPALM2	0.8376	-0.0227924
30	5	mPALM2	0.860384	-0.00518006
30	6	mPALM2	0.875093	0.00435735
30	7	mPALM2	0.885789	0.00988056
30	8	mPALM2	0.894195	0.0131147
30	9	mPALM2	0.899238	0.0129866
30	10	mPALM2	0.908423	0.0169989
30	11	mPALM2	0.913943	0.0173468
30	12	mPALM2	0.916304	0.0145358
30	13	mPALM2	0.91822	0.0112807
30	14	mPALM2	0.923463	0.0113515
30	15	mPALM2	0.927434	0.0101502
30	16	mPALM2	0.928994	0.00653893
30	17	mPALM2	0.931671	0.00404305
30	18	mPALM2	0.936439	0.00363918
30	19	mPALM2	0.938202	0.000230451
30	20	mPALM2	0.93845	-0.0046933
30	21	mPALM2	0.941138	-0.00717697
30	22	mPALM2	0.94621	-0.00727763
30	23	mPALM2	0.949471	-0.0091879
30	24	mPALM2	0.949832	-0.0139986
30	25	mPALM2	0.956007	-0.0129958
30	26	mPALM2	0.962756	-0.0114194
30	27	mPALM2	0.974917	-0.00443035
30	28	mPALM2	0.995459	0.0109404
30	29	mPALM2	1.03514	0.0454502
30	30	mPALM2	1.10825	0.113388
30	31	mPALM2	1.23461	0.234574
30	32	mPALM2	1.42749	0.422287
30	33	mPALM2	1.67528	0.6649
30	34	mPALM2	1.93786	0.922308
30	35	mPALM2	2.15891	1.13819
30	36	mPALM2	2.3144	1.2885
30	37	mPALM2	2.40989	1.37882
30	38	mPALM2	2.4751	1.43886
30	39	mPALM2	2.51655	1.47514
30	40	mPALM2	2.54088	1.4943
31	1	mPALM2	0.168713	-0.0122212
31	2	mPALM2	0.171556	-0.0100822
31	3	mPALM2	0.176896	-0.00544522
31	4	mPALM2	0.179929	-0.00311528
31	5	mPALM2	0.182013	-0.00173536
31	6	mPALM2	0.183133	-0.00131853
31	7	mPALM2	0.185402	0.000247258
31	8	mPALM2	0.186817	0.000959059
31	9	mPALM2	0.18832	0.00175882
31	10	mPALM2	0.189001	0.00173605
31	11	mPALM2	0.19028	0.00231218
31	12	mPALM2	0.191475	0.00280364
31	13	mPALM2	0.191793	0.00241849
31	14	mPALM2	0.192209	0.00213103
31	15	mPALM2	0.19264	0.00185874
31	16	mPALM2	0.193007	0.00152152
31	17	mPALM2	0.193286	0.00109794
31	18	mPALM2	0.194029	0.00113679
31	19	mPALM2	0.19453	0.000934625
31	20	mPALM2	0.194135	-0.00016329
31	21	mPALM2	0.194098	-0.000904159
31	22	mPALM2	0.194566	-0.0011397
31	23	mPALM2	0.195738	-0.000671042
31	24	mPALM2	0.196108	-0.00100344
31	25	mPALM2	0.196295	-0.00151982
31	26	mPALM2	0.196866	-0.00165289
31	27	mPALM2	0.197478	-0.00174396
31	28	mPALM2	0.198577	-0.00134826
31	29	mPALM2	0.199992	-0.000636297
31	30	mPALM2	0.202813	0.00148112
31	31	mPALM2	0.208006	0.00597061
31	32	mPALM2	0.217181	0.0144424
31	33	mPALM2	0.23358	0.0301376
31	34	mPALM2	0.26502	0.0608742
31	35	mPALM2	0.323629	0.11878
31	36	mPALM2	0.428564	0.223012
31	37	mPALM2	0.597345	0.391089
31	38	mPALM2	0.832461	0.625502
31	39	mPALM2	1.10513	0.897466
31	40	mPALM2	1.32601	1.11764
32	1	mPALM2	0.0406586	-0.00776972
32	2	mPALM2	0.0423925	-0.00642114
32	3	mPALM2	0.0453883	-0.00381067
32	4	mPALM2	0.0482167	-0.00136759
32	5	mPALM2	0.050211	0.000241317
32	6	mPALM2	0.0516099	0.0012549
32	7	mPALM2	0.0522127	0.00147238
32	8	mPALM2	0.0527274	0.00160169
32	9	mPALM2	0.0530942	0.00158313
32	10	mPALM2	0.0530944	0.00119805
32	11	mPALM2	0.0534662	0.0011845
32	12	mPALM2	0.0534415	0.000774472
32	13	mPALM2	0.0531239	7.15104e-05
32	14	mPALM2	0.0535181	8.03701e-05
32	15	mPALM2	0.0536609	-0.00016219
32	16	mPALM2	0.0537202	-0.000488215
32	17	mPALM2	0.0544043	-0.000189413
32	18	mPALM2	0.0547497	-0.000229388
32	19	mPALM2	0.0551007	-0.000263738
32	20	mPALM2	0.0554538	-0.000295935
32	21	mPALM2	0.0553927	-0.000742369
32	22	mPALM2	0.0554476	-0.00107283
32	23	mPALM2	0.0553809	-0.0015249
32	24	mPALM2	0.0556304	-0.0016607
32	25	mPALM2	0.0562911	-0.00138536
32	26	mPALM2	0.0568559	-0.00120591
32	27	mPALM2	0.0579266	-0.000520541
32	28	mPALM2	0.0599715	0.00113902
32	29	mPALM2	0.0635362	0.0043184
32	30	mPALM2	0.0699144	0.0103113
32	31	mPALM2	0.0833034	0.0233149
32	32	mPALM2	0.107746	0.0473719
32	33	mPALM2	0.153862	0.0931024
32	34	mPALM2	0.237729	0.176585
32	35	mPALM2	0.379614	0.318084
32	36	mPALM2	0.592237	0.530321
32	37	mPALM2	0.860031	0.79773
32	38	mPALM2	1.13225	1.06956
32	39	mPALM2	1.35219	1.28912
32	40	mPALM2	1.49407	1.43062
33	1	mPALM2	0.0434274	-0.00558736
33	2	mPALM2	0.0449068	-0.00462051
33	3	mPALM2	0.0478281	-0.0022117
33	4	mPALM2	0.0497553	-0.000797001
33	5	mPALM2	0.0511746	0.000109819
33	6	mPALM2	0.0520088	0.000431557
33	7	mPALM2	0.0527758	0.000685997
33	8	mPALM2	0.053548	0.000945768
33	9	mPALM2	0.0541604	0.00104565
33	10	mPALM2	0.0546634	0.00103612
33	11	mPALM2	0.0548172	0.000677508
33	12	mPALM2	0.0550429	0.000390705
33	13	mPALM2	0.0558046	0.000639933
33	14	mPALM2	0.0563305	0.000653302
33	15	mPALM2	0.0563668	0.000177113
33	16	mPALM2	0.0567405	3.83523e-05
33	17	mPALM2	0.0570349	-0.000179835
33	18	mPALM2	0.057591	-0.000136153
33	19	mPALM2	0.0576538	-0.000585919
33	20	mPALM2	0.0578602	-0.000891938
33	21	mPALM2	0.0581377	-0.00112697
33	22	mPALM2	0.0585064	-0.00127076
33	23	mPALM2	0.0588863	-0.00140336
33	24	mPALM2	0.059143	-0.00165915
33	25	mPALM2	0.0599247	-0.00138988
33	26	mPALM2	0.0613793	-0.000447813
33	27	mPALM2	0.063605	0.00126538
33	28	mPALM2	0.0668554	0.00400327
33	29	mPALM2	0.0739696	0.010605
33	30	mPALM2	0.0875451	0.023668
33	31	mPALM2	0.112566	0.0481766
33	32	mPALM2	0.160624	0.0957215
33	33	mPALM2	0.247425	0.182011
33	34	mPALM2	0.393185	0.327257
33	35	mPALM2	0.609371	0.542931
33	36	mPALM2	0.878231	0.811279
33	37	mPALM2	1.14509	1.07763
33	38	mPALM2	1.36084	1.29286
33	39	mPALM2	1.51461	1.44612
33	40	mPALM2	1.60777	1.53877
34	1	mPALM2	0.0487921	-0.00891147
34	2	mPALM2	0.0512979	-0.00690365
34	3	mPALM2	0.0553526	-0.0033469
34	4	mPALM2	0.0576547	-0.00154277
34	5	mPALM2	0.0592535	-0.000441953
34	6	mPALM2	0.0607909	0.000597506
34	7	mPALM2	0.0610822	0.000390837
34	8	mPALM2	0.0621178	0.000928541
34	9	mPALM2	0.0632869	0.00159958
34	10	mPALM2	0.0634561	0.00127083
34	11	mPALM2	0.0637523	0.00106911
34	12	mPALM2	0.0645354	0.00135427
34	13	mPALM2	0.0647168	0.00103765
34	14	mPALM2	0.0648617	0.000684635
34	15	mPALM2	0.0655011	0.000826086
34	16	mPALM2	0.0655902	0.000417209
34	17	mPALM2	0.0659542	0.000283212
34	18	mPALM2	0.0658975	-0.000271451
34	19	mPALM2	0.0663462	-0.000320727
34	20	mPALM2	0.0669485	-0.000216386
34	21	mPALM2	0.0668545	-0.000808347
34	22	mPALM2	0.0670998	-0.001061
34	23	mPALM2	0.0672804	-0.00137842
34	24	mPALM2	0.067841	-0.0013157
34	25	mPALM2	0.0683028	-0.00135193
34	26	mPALM2	0.0689561	-0.00119659
34	27	mPALM2	0.0698055	-0.000845094
34	28	mPALM2	0.0706749	-0.000473709
34	29	mPALM2	0.0724948	0.00084825
34	30	mPALM2	0.0754078	0.00326328
34	31	mPALM2	0.080918	0.00827552
34	32	mPALM2	0.0910511	0.0179106
34	33	mPALM2	0.110536	0.0368976
34	34	mPALM2	0.14706	0.072924
34	35	mPALM2	0.215067	0.140433
34	36	mPALM2	0.335615	0.260483
34	37	mPALM2	0.527919	0.452289
34	38	mPALM2	0.791648	0.71552
34	39	mPALM2	1.0859	1.00927
34	40	mPALM2	1.31786	1.24073
35	1	mPALM2	0.0930419	-0.0127
35	2	mPALM2	0.0964305	-0.0103006
35	3	mPALM2	0.102091	-0.0056291
35	4	mPALM2	0.105609	-0.00310018
35	5	mPALM2	0.108394	-0.00130438
35	6	mPALM2	0.111025	0.000336549
35	7	mPALM2	0.112704	0.00102685
35	8	mPALM2	0.113791	0.00112493
35	9	mPALM2	0.114879	0.00122287
35	10	mPALM2	0.116456	0.00181073
35	11	mPALM2	0.117925	0.00229093
35	12	mPALM2	0.11916	0.00253616
35	13	mPALM2	0.119384	0.00177129
35	14	mPALM2	0.120167	0.00156537
35	15	mPALM2	0.12127	0.00167872
35	16	mPALM2	0.121833	0.0012527
35	17	mPALM2	0.122406	0.000836096
35	18	mPALM2	0.123154	0.000595108
35	19	mPALM2	0.123188	-0.000360077
35	20	mPALM2	0.123677	-0.00086065
35	21	mPALM2	0.124948	-0.000578779
35	22	mPALM2	0.125175	-0.00134014
35	23	mPALM2	0.126168	-0.00133656
35	24	mPALM2	0.127199	-0.0012951
35	25	mPALM2	0.127738	-0.00174535
35	26	mPALM2	0.129274	-0.0011985
35	27	mPALM2	0.131002	-0.000460172
35	28	mPALM2	0.133612	0.00116067
35	29	mPALM2	0.139587	0.00614647
35	30	mPALM2	0.149049	0.0146198
35	31	mPALM2	0.166473	0.0310545
35	32	mPALM2	0.200374	0.0639659
35	33	mPALM2	0.263138	0.12574
35	34	mPALM2	0.375603	0.237216
35	35	mPALM2	0.557382	0.418006
35	36	mPALM2	0.809369	0.669004
35	37	mPALM2	1.0978	0.95645
35	38	mPALM2	1.36239	1.22004
35	39	mPALM2	1.56262	1.41928
35	40	mPALM2	1.677	1.53268
36	1	mPALM2	0.0519341	-0.00607036
36	2	mPALM2	0.0540541	-0.00448036
36	3	mPALM2	0.0567376	-0.00232681
36	4	mPALM2	0.0581947	-0.00139966
36	5	mPALM2	0.0593909	-0.000733465
36	6	mPALM2	0.0604761	-0.000178315
36	7	mPALM2	0.0616549	0.000470541
36	8	mPALM2	0.0626308	0.000916413
36	9	mPALM2	0.0633832	0.00113885
36	10	mPALM2	0.0641133	0.00133891
36	11	mPALM2	0.0641031	0.000798735
36	12	mPALM2	0.0650472	0.00121289
36	13	mPALM2	0.0655762	0.00121186
36	14	mPALM2	0.0658722	0.000977873
36	15	mPALM2	0.0661517	0.000727395
36	16	mPALM2	0.0665933	0.000638968
36	17	mPALM2	0.0669034	0.000419105
36	18	mPALM2	0.0669113	-0.000102984
36	19	mPALM2	0.0675285	-1.57858e-05
36	20	mPALM2	0.0677218	-0.000352541
36	21	mPALM2	0.0678696	-0.00073467
36	22	mPALM2	0.0678011	-0.00133316
36	23	mPALM2	0.068307	-0.0013573
36	24	mPALM2	0.0688804	-0.00131387
36	25	mPALM2	0.0692409	-0.00148334
36	26	mPALM2	0.0697335	-0.00152072
36	27	mPALM2	0.0701228	-0.0016614
36	28	mPALM2	0.0715108	-0.000803429
36	29	mPALM2	0.0741243	0.00128006
36	30	mPALM2	0.0775601	0.00418585
36	31	mPALM2	0.0833916	0.00948741
36	32	mPALM2	0.0948718	0.0204376
36	33	mPALM2	0.116905	0.0419411
36	34	mPALM2	0.157971	0.0824772
36	35	mPALM2	0.233326	0.157302
36	36	mPALM2	0.36567	0.289116
36	37	mPALM2	0.573725	0.496641
36	38	mPALM2	0.850295	0.772681
36	39	mPALM2	1.14706	1.06891
36	40	mPALM2	1.37368	1.29501
37	1	hPALM2	0.255761	-0.0357794
37	2	hPALM2	0.263047	-0.0301386
37	3	hPALM2	0.276807	-0.0180225
37	4	hPALM2	0.293402	-0.00307248
37	5	hPALM2	0.300857	0.0027372
37	6	hPALM2	0.302021	0.00225698
37	7	hPALM2	0.304456	0.00304665
37	8	hPALM2	0.306608	0.00355405
37	9	hPALM2	0.308842	0.00414344
37	10	hPALM2	0.310251	0.0039073
37	11	hPALM2	0.312483	0.00449484
37	12	hPALM2	0.31373	0.00409664
37	13	hPALM2	0.314556	0.00327838
37	14	hPALM2	0.315178	0.00225585
37	15	hPALM2	0.315409	0.000841749
37	16	hPALM2	0.316249	3.67169e-05
37	17	hPALM2	0.317248	-0.000608485
37	18	hPALM2	0.317844	-0.0016579
37	19	hPALM2	0.319214	-0.00193254
37	20	hPALM2	0.319885	-0.00290649
37	21	hPALM2	0.320526	-0.00390979
37	22	hPALM2	0.323541	-0.00253958
37	23	hPALM2	0.329283	0.00155709
37	24	hPALM2	0.338445	0.00907433
37	25	hPALM2	0.358871	0.0278562
37	26	hPALM2	0.395971	0.0633113
37	27	hPALM2	0.462621	0.128316
37	28	hPALM2	0.581242	0.245293
37	29	hPALM2	0.768353	0.430759
37	30	hPALM2	1.02084	0.6816
37	31	hPALM2	1.29485	0.953967
37	32	hPALM2	1.52812	1.18559
37	33	hPALM2	1.68963	1.34545
37	34	hPALM2	1.78463	1.43881
37	35	hPALM2	1.84062	1.49316
37	36	hPALM2	1.879	1.5299
37	37	hPALM2	1.90519	1.55444
37	38	hPALM2	1.92307	1.57068
37	39	hPALM2	1.94042	1.58638
37	40	hPALM2	1.95041	1.59472
38	1	hPALM2	0.0479564	-0.00500455
38	2	hPALM2	0.0494854	-0.00401429
38	3	hPALM2	0.0523049	-0.00173353
38	4	hPALM2	0.0540636	-0.000513451
38	5	hPALM2	0.0552729	0.000157144
38	6	hPALM2	0.0560599	0.0004054
38	7	hPALM2	0.056889	0.000695766
38	8	hPALM2	0.0571544	0.000422455
38	9	hPALM2	0.0579707	0.000700088
38	10	hPALM2	0.0583651	0.000555686
38	11	hPALM2	0.0586694	0.000321345
38	12	hPALM2	0.0592897	0.000402883
38	13	hPALM2	0.0598981	0.000472645
38	14	hPALM2	0.0600863	0.000122078
38	15	hPALM2	0.060552	4.90537e-05
38	16	hPALM2	0.0607536	-0.000288027
38	17	hPALM2	0.0609773	-0.000603062
38	18	hPALM2	0.061333	-0.000786102
38	19	hPALM2	0.0617987	-0.000859085
38	20	hPALM2	0.0624716	-0.000724869
38	21	hPALM2	0.0634137	-0.000321533
38	22	hPALM2	0.065799	0.00152511
38	23	hPALM2	0.0699969	0.00518429
38	24	hPALM2	0.0772172	0.0118659
38	25	hPALM2	0.0917813	0.0258913
38	26	hPALM2	0.119817	0.0533887
38	27	hPALM2	0.172474	0.105507
38	28	hPALM2	0.266856	0.19935
38	29	hPALM2	0.424617	0.356572
38	30	hPALM2	0.655419	0.586836
38	31	hPALM2	0.936515	0.867393
38	32	hPALM2	1.19939	1.12973
38	33	hPALM2	1.3979	1.3277
38	34	hPALM2	1.52496	1.45422
38	35	hPALM2	1.59888	1.5276
38	36	hPALM2	1.6427	1.57089
38	37	hPALM2	1.67573	1.60337
38	38	hPALM2	1.70022	1.62732
38	39	hPALM2	1.71508	1.64165
38	40	hPALM2	1.72818	1.65421
39	1	hPALM2	0.0942062	-0.0140729
39	2	hPALM2	0.097721	-0.0114892
39	3	hPALM2	0.103907	-0.00623441
39	4	hPALM2	0.108484	-0.00258889
39	5	hPALM2	0.112261	0.000257232
39	6	hPALM2	0.113848	0.000913075
39	7	hPALM2	0.115648	0.00178206
39	8	hPALM2	0.116855	0.00205744
39	9	hPALM2	0.117819	0.00209013
39	10	hPALM2	0.118874	0.00221423
39	11	hPALM2	0.119628	0.00203717
39	12	hPALM2	0.119863	0.00134096
39	13	hPALM2	0.120479	0.00102541
39	14	hPALM2	0.120985	0.000600602
39	15	hPALM2	0.12157	0.000254647
39	16	hPALM2	0.122085	-0.000161597
39	17	hPALM2	0.122778	-0.000399757
39	18	hPALM2	0.123386	-0.00072298
39	19	hPALM2	0.123772	-0.00126838
39	20	hPALM2	0.124103	-0.00186906
39	21	hPALM2	0.125466	-0.00143671
39	22	hPALM2	0.127943	0.000108831
39	23	hPALM2	0.132488	0.00372282
39	24	hPALM2	0.140829	0.0111329
39	25	hPALM2	0.156947	0.0263191
39	26	hPALM2	0.188321	0.0567621
39	27	hPALM2	0.247066	0.114575
39	28	hPALM2	0.351063	0.217641
39	29	hPALM2	0.520673	0.38632
39	30	hPALM2	0.762414	0.627131
39	31	hPALM2	1.0397	0.903486
39	32	hPALM2	1.29252	1.15538
39	33	hPALM2	1.47628	1.3382
39	34	hPALM2	1.59111	1.4521
39	35	hPALM2	1.65464	1.5147
39	36	hPALM2	1.69378	1.55291
39	37	hPALM2	1.72131	1.57951
39	38	hPALM2	1.74514	1.6024
39	39	hPALM2	1.76373	1.62007
39	40	hPALM2	1.77601	1.63141
40	1	hPALM2	0.0680248	-0.0109309
40	2	hPALM2	0.0714531	-0.00843526
40	3	hPALM2	0.0778766	-0.00294456
40	4	hPALM2	0.0816399	-0.000113978
40	5	hPALM2	0.0837667	0.00108
40	6	hPALM2	0.0848271	0.00120768
40	7	hPALM2	0.0858702	0.00131803
40	8	hPALM2	0.0870064	0.00152151
40	9	hPALM2	0.0872654	0.000847696
40	10	hPALM2	0.0876701	0.000319634
40	11	hPALM2	0.0882741	-9.11776e-06
40	12	hPALM2	0.089037	-0.000178963
40	13	hPALM2	0.0894337	-0.000715042
40	14	hPALM2	0.0894743	-0.00160713
40	15	hPALM2	0.0905067	-0.00150753
40	16	hPALM2	0.0914103	-0.00153665
40	17	hPALM2	0.0930074	-0.000872287
40	18	hPALM2	0.0949449	0.000132444
40	19	hPALM2	0.0988035	0.00305827
40	20	hPALM2	0.105647	0.00896863
40	21	hPALM2	0.118877	0.0212666
40	22	hPALM2	0.144332	0.0457887
40	23	hPALM2	0.194056	0.0945796
40	24	hPALM2	0.283556	0.183147
40	25	hPALM2	0.433855	0.332513
40	26	hPALM2	0.657363	0.555088
40	27	hPALM2	0.9343	0.831092
40	28	hPALM2	1.20142	1.09728
40	29	hPALM2	1.40944	1.30437
40	30	hPALM2	1.54366	1.43765
40	31	hPALM2	1.61985	1.51291
40	32	hPALM2	1.66844	1.56057
40	33	hPALM2	1.70182	1.59302
40	34	hPALM2	1.7259	1.61616
40	35	hPALM2	1.74539	1.63472
40	36	hPALM2	1.76243	1.65083
40	37	hPALM2	1.7749	1.66236
40	38	hPALM2	1.78169	1.66822
40	39	hPALM2	1.78789	1.67349
40	40	hPALM2	1.79136	1.67602
41	1	hPALM2	0.136743	-0.0136943
41	2	hPALM2	0.141123	-0.0104242
41	3	hPALM2	0.148694	-0.0039638
41	4	hPALM2	0.152815	-0.000952074
41	5	hPALM2	0.155937	0.00105908
41	6	hPALM2	0.157619	0.00163168
41	7	hPALM2	0.159045	0.00194777
41	8	hPALM2	0.159429	0.00122113
41	9	hPALM2	0.160264	0.00094678
41	10	hPALM2	0.161354	0.00092661
41	11	hPALM2	0.162306	0.000768559
41	12	hPALM2	0.163009	0.00036075
41	13	hPALM2	0.163173	-0.000584425
41	14	hPALM2	0.163549	-0.00131839
41	15	hPALM2	0.164886	-0.0010919
41	16	hPALM2	0.165693	-0.00139528
41	17	hPALM2	0.166962	-0.00123597
41	18	hPALM2	0.168808	-0.000499906
41	19	hPALM2	0.172597	0.00217939
41	20	hPALM2	0.180224	0.00869622
41	21	hPALM2	0.194211	0.0215733
41	22	hPALM2	0.220344	0.046596
41	23	hPALM2	0.269672	0.0948137
41	24	hPALM2	0.359634	0.183665
41	25	hPALM2	0.511919	0.334841
41	26	hPALM2	0.735031	0.556842
41	27	hPALM2	1.00552	0.826223
41	28	hPALM2	1.26716	1.08675
41	29	hPALM2	1.46627	1.28475
41	30	hPALM2	1.59459	1.41196
41	31	hPALM2	1.66796	1.48422
41	32	hPALM2	1.71354	1.52869
41	33	hPALM2	1.74652	1.56056
41	34	hPALM2	1.77165	1.58458
41	35	hPALM2	1.78732	1.59914
41	36	hPALM2	1.80177	1.61248
41	37	hPALM2	1.81434	1.62394
41	38	hPALM2	1.82253	1.63102
41	39	hPALM2	1.82849	1.63588
41	40	hPALM2	1.82943	1.6357
42	1	hPALM2	0.0540187	-0.0113871
42	2	hPALM2	0.05759	-0.00894674
42	3	hPALM2	0.0656211	-0.0020465
42	4	hPALM2	0.0696123	0.000813686
42	5	hPALM2	0.0706181	0.000688592
42	6	hPALM2	0.0720178	0.00095729
42	7	hPALM2	0.0735155	0.00132411
42	8	hPALM2	0.0745147	0.00119237
42	9	hPALM2	0.0747326	0.00027935
42	10	hPALM2	0.0754636	-0.000120611
42	11	hPALM2	0.0760181	-0.000697024
42	12	hPALM2	0.077113	-0.000733091
42	13	hPALM2	0.077952	-0.001025
42	14	hPALM2	0.0788384	-0.00126954
42	15	hPALM2	0.0799209	-0.00131797
42	16	hPALM2	0.0813655	-0.00100432
42	17	hPALM2	0.0829822	-0.000518525
42	18	hPALM2	0.0848996	0.000267848
42	19	hPALM2	0.088972	0.00320935
42	20	hPALM2	0.095994	0.0091004
42	21	hPALM2	0.109682	0.0216574
42	22	hPALM2	0.136399	0.0472435
42	23	hPALM2	0.185883	0.0955963
42	24	hPALM2	0.276033	0.184616
42	25	hPALM2	0.428106	0.335558
42	26	hPALM2	0.655257	0.561577
42	27	hPALM2	0.93272	0.83791
42	28	hPALM2	1.20325	1.10731
42	29	hPALM2	1.41291	1.31584
42	30	hPALM2	1.54878	1.45058
42	31	hPALM2	1.62874	1.5294
42	32	hPALM2	1.67624	1.57578
42	33	hPALM2	1.70785	1.60625
42	34	hPALM2	1.73305	1.63032
42	35	hPALM2	1.75273	1.64887
42	36	hPALM2	1.76591	1.66092
42	37	hPALM2	1.7787	1.67258
42	38	hPALM2	1.78839	1.68114
42	39	hPALM2	1.79525	1.68687
42	40	hPALM2	1.80266	1.69315
43	1	hPALM2	0.097143	-0.0137531
43	2	hPALM2	0.101153	-0.0106014
43	3	hPALM2	0.107929	-0.00468305
43	4	hPALM2	0.111929	-0.00154095
43	5	hPALM2	0.114253	-7.45443e-05
43	6	hPALM2	0.116084	0.000898496
43	7	hPALM2	0.117588	0.00154446
43	8	hPALM2	0.118792	0.00189053
43	9	hPALM2	0.119528	0.00176944
43	10	hPALM2	0.120173	0.00155597
43	11	hPALM2	0.120547	0.00107214
43	12	hPALM2	0.121286	0.000953077
43	13	hPALM2	0.122003	0.000812732
43	14	hPALM2	0.122513	0.000465038
43	15	hPALM2	0.1227	-0.000206332
43	16	hPALM2	0.123252	-0.000511811
43	17	hPALM2	0.123934	-0.000688015
43	18	hPALM2	0.12442	-0.00105933
43	19	hPALM2	0.124712	-0.00162599
43	20	hPALM2	0.125872	-0.00132372
43	21	hPALM2	0.12771	-0.000343596
43	22	hPALM2	0.130007	0.00109546
43	23	hPALM2	0.134738	0.00496925
43	24	hPALM2	0.145047	0.0144199
43	25	hPALM2	0.163761	0.0322765
43	26	hPALM2	0.199573	0.0672306
43	27	hPALM2	0.266364	0.133163
43	28	hPALM2	0.383188	0.24913
43	29	hPALM2	0.569372	0.434456
43	30	hPALM2	0.825107	0.689333
43	31	hPALM2	1.10786	0.971233
43	32	hPALM2	1.35399	1.2165
43	33	hPALM2	1.52466	1.38632
43	34	hPALM2	1.62548	1.48627
43	35	hPALM2	1.68713	1.54707
43	36	hPALM2	1.72998	1.58906
43	37	hPALM2	1.76115	1.61937
43	38	hPALM2	1.78335	1.64071
43	39	hPALM2	1.7954	1.65191
43	40	hPALM2	1.80513	1.66078
44	1	hPALM2	0.101704	-0.00869015
44	2	hPALM2	0.10441	-0.00667406
44	3	hPALM2	0.108813	-0.00295959
44	4	hPALM2	0.111535	-0.000926467
44	5	hPALM2	0.112886	-0.000265304
44	6	hPALM2	0.114565	0.000724899
44	7	hPALM2	0.115713	0.00118385
44	8	hPALM2	0.116371	0.00115286
44	9	hPALM2	0.117258	0.00135092
44	10	hPALM2	0.117834	0.00123737
44	11	hPALM2	0.118347	0.00106178
44	12	hPALM2	0.118886	0.000911438
44	13	hPALM2	0.118939	0.000275463
44	14	hPALM2	0.119407	5.40149e-05
44	15	hPALM2	0.120209	0.000167091
44	16	hPALM2	0.120213	-0.000517992
44	17	hPALM2	0.120304	-0.00111619
44	18	hPALM2	0.120911	-0.00119817
44	19	hPALM2	0.121272	-0.00152611
44	20	hPALM2	0.121956	-0.00153146
44	21	hPALM2	0.122942	-0.00123401
44	22	hPALM2	0.125015	0.000149877
44	23	hPALM2	0.12856	0.00300574
44	24	hPALM2	0.135565	0.00932175
44	25	hPALM2	0.148499	0.0215659
44	26	hPALM2	0.17268	0.0450585
44	27	hPALM2	0.219426	0.0911149
44	28	hPALM2	0.303925	0.174925
44	29	hPALM2	0.448283	0.318594
44	30	hPALM2	0.666515	0.536137
44	31	hPALM2	0.94134	0.810273
44	32	hPALM2	1.21543	1.08368
44	33	hPALM2	1.43027	1.29782
44	34	hPALM2	1.57053	1.4374
44	35	hPALM2	1.65379	1.51997
44	36	hPALM2	1.70277	1.56826
44	37	hPALM2	1.73665	1.60145
44	38	hPALM2	1.7616	1.62571
44	39	hPALM2	1.78067	1.64409
44	40	hPALM2	1.79527	1.65801
45	1	hPALM2	0.056162	-0.00600853
45	2	hPALM2	0.0584942	-0.00427626
45	3	hPALM2	0.0614774	-0.00189293
45	4	hPALM2	0.0635494	-0.000420825
45	5	hPALM2	0.0648118	0.000241743
45	6	hPALM2	0.0655521	0.000382151
45	7	hPALM2	0.0664063	0.000636487
45	8	hPALM2	0.0670247	0.000654937
45	9	hPALM2	0.067666	0.000696401
45	10	hPALM2	0.0683069	0.00073736
45	11	hPALM2	0.0687443	0.000574962
45	12	hPALM2	0.0689982	0.000228899
45	13	hPALM2	0.0695681	0.000198913
45	14	hPALM2	0.0701855	0.000216521
45	15	hPALM2	0.070213	-0.000355868
45	16	hPALM2	0.070237	-0.000931832
45	17	hPALM2	0.0713552	-0.000413456
45	18	hPALM2	0.0717617	-0.000606804
45	19	hPALM2	0.0723624	-0.000605997
45	20	hPALM2	0.0730685	-0.000499794
45	21	hPALM2	0.074125	-4.32125e-05
45	22	hPALM2	0.0759704	0.00120235
45	23	hPALM2	0.0803235	0.0049555
45	24	hPALM2	0.0878028	0.011835
45	25	hPALM2	0.102344	0.0257767
45	26	hPALM2	0.130164	0.0529962
45	27	hPALM2	0.18244	0.104673
45	28	hPALM2	0.27721	0.198843
45	29	hPALM2	0.436716	0.357748
45	30	hPALM2	0.670702	0.591135
45	31	hPALM2	0.952968	0.872801
45	32	hPALM2	1.22052	1.13975
45	33	hPALM2	1.42274	1.34138
45	34	hPALM2	1.55077	1.4688
45	35	hPALM2	1.62344	1.54087
45	36	hPALM2	1.66908	1.58591
45	37	hPALM2	1.703	1.61923
45	38	hPALM2	1.7276	1.64323
45	39	hPALM2	1.74593	1.66097
45	40	hPALM2	1.75903	1.67346
46	1	hPALM2	0.208621	-0.0271047
46	2	hPALM2	0.216486	-0.0204932
46	3	hPALM2	0.229361	-0.0088723
46	4	hPALM2	0.235952	-0.00353527
46	5	hPALM2	0.240323	-0.000418221
46	6	hPALM2	0.243144	0.00114883
46	7	hPALM2	0.2458	0.00255022
46	8	hPALM2	0.247378	0.0028742
46	9	hPALM2	0.248285	0.00252724
46	10	hPALM2	0.249921	0.0029092
46	11	hPALM2	0.251289	0.00302282
46	12	hPALM2	0.252016	0.00249598
46	13	hPALM2	0.25243	0.00165581
46	14	hPALM2	0.25337	0.00134227
46	15	hPALM2	0.254514	0.0012321
46	16	hPALM2	0.2546	6.41043e-05
46	17	hPALM2	0.255599	-0.00019114
46	18	hPALM2	0.256282	-0.000762289
46	19	hPALM2	0.256406	-0.00189202
46	20	hPALM2	0.25711	-0.00244234
46	21	hPALM2	0.25803	-0.00277647
46	22	hPALM2	0.26029	-0.0017706
46	23	hPALM2	0.264152	0.000837891
46	24	hPALM2	0.271288	0.00672005
46	25	hPALM2	0.284069	0.0182466
46	26	hPALM2	0.309765	0.0426888
46	27	hPALM2	0.357115	0.0887845
46	28	hPALM2	0.442411	0.172826
46	29	hPALM2	0.586612	0.315774
46	30	hPALM2	0.803421	0.531328
46	31	hPALM2	1.06891	0.795565
46	32	hPALM2	1.3259	1.0513
46	33	hPALM2	1.52606	1.25021
46	34	hPALM2	1.65259	1.37549
46	35	hPALM2	1.72644	1.44808
46	36	hPALM2	1.77313	1.49351
46	37	hPALM2	1.8048	1.52393
46	38	hPALM2	1.82748	1.54535
46	39	hPALM2	1.84448	1.5611
46	40	hPALM2	1.85874	1.57411
47	1	hPALM2	0.0632441	-0.00955975
47	2	hPALM2	0.0660807	-0.00761723
47	3	hPALM2	0.0709857	-0.00360637
47	4	hPALM2	0.0743692	-0.00111706
47	5	hPALM2	0.0766463	0.000265952
47	6	hPALM2	0.0781262	0.000851626
47	7	hPALM2	0.0793484	0.00117972
47	8	hPALM2	0.080259	0.00119621
47	9	hPALM2	0.0813208	0.00136382
47	10	hPALM2	0.0823179	0.00146684
47	11	hPALM2	0.0829513	0.00120609
47	12	hPALM2	0.0831194	0.000480029
47	13	hPALM2	0.0838596	0.000326113
47	14	hPALM2	0.084596	0.000168368
47	15	hPALM2	0.0851759	-0.000145913
47	16	hPALM2	0.0860129	-0.000202978
47	17	hPALM2	0.0866485	-0.000461537
47	18	hPALM2	0.0871349	-0.000869257
47	19	hPALM2	0.0873908	-0.00150749
47	20	hPALM2	0.0876273	-0.00216515
47	21	hPALM2	0.0890579	-0.00162874
47	22	hPALM2	0.0916431	6.23813e-05
47	23	hPALM2	0.0956122	0.00313734
47	24	hPALM2	0.102464	0.00909507
47	25	hPALM2	0.116441	0.0221779
47	26	hPALM2	0.143358	0.0482012
47	27	hPALM2	0.193365	0.0973136
47	28	hPALM2	0.283757	0.186812
47	29	hPALM2	0.434025	0.336185
47	30	hPALM2	0.653181	0.554447
47	31	hPALM2	0.917865	0.818237
47	32	hPALM2	1.16853	1.068
47	33	hPALM2	1.35682	1.2554
47	34	hPALM2	1.47912	1.37681
47	35	hPALM2	1.54907	1.44586
47	36	hPALM2	1.59516	1.49106
47	37	hPALM2	1.62705	1.52206
47	38	hPALM2	1.6482	1.54232
47	39	hPALM2	1.66496	1.55818
47	40	hPALM2	1.6779	1.57022
48	1	hPALM2	0.0217605	-0.00992746
48	2	hPALM2	0.0240759	-0.00843119
48	3	hPALM2	0.0285035	-0.00482261
48	4	hPALM2	0.0325773	-0.0015679
48	5	hPALM2	0.034949	-1.52287e-05
48	6	hPALM2	0.0367454	0.000962001
48	7	hPALM2	0.0381098	0.00150739
48	8	hPALM2	0.038703	0.00128153
48	9	hPALM2	0.0395626	0.00132208
48	10	hPALM2	0.0406579	0.00159828
48	11	hPALM2	0.0415422	0.00166351
48	12	hPALM2	0.0421805	0.00148273
48	13	hPALM2	0.0429462	0.00142936
48	14	hPALM2	0.0431598	0.000823875
48	15	hPALM2	0.0430442	-0.000110778
48	16	hPALM2	0.0435424	-0.000431689
48	17	hPALM2	0.0440241	-0.000769051
48	18	hPALM2	0.0444879	-0.00112431
48	19	hPALM2	0.0448603	-0.00157098
48	20	hPALM2	0.0449386	-0.00231174
48	21	hPALM2	0.046597	-0.00147244
48	22	hPALM2	0.0487503	-0.000138225
48	23	hPALM2	0.0519718	0.00226419
48	24	hPALM2	0.0586164	0.0080898
48	25	hPALM2	0.072016	0.0206703
48	26	hPALM2	0.0975795	0.0454147
48	27	hPALM2	0.145269	0.0922848
48	28	hPALM2	0.231813	0.17801
48	29	hPALM2	0.377772	0.32315
48	30	hPALM2	0.593727	0.538286
48	31	hPALM2	0.859299	0.803038
48	32	hPALM2	1.11648	1.0594
48	33	hPALM2	1.31917	1.26127
48	34	hPALM2	1.44794	1.38923
48	35	hPALM2	1.52119	1.46165
48	36	hPALM2	1.56714	1.50678
48	37	hPALM2	1.59788	1.5367
48	38	hPALM2	1.621	1.55901
48	39	hPALM2	1.64025	1.57744
48	40	hPALM2	1.65042	1.58679
49	1	mC8A	0.0865611	-0.0129971
49	2	mC8A	0.0911691	-0.0100996
49	3	mC8A	0.0993258	-0.00365345
49	4	mC8A	0.104016	-0.00067416
49	5	mC8A	0.106972	0.000571442
49	6	mC8A	0.109581	0.00147052
49	7	mC8A	0.111549	0.00172743
49	8	mC8A	0.113607	0.00207558
49	9	mC8A	0.114586	0.00134344
49	10	mC8A	0.115465	0.000512233
49	11	mC8A	0.116422	-0.00024164
49	12	mC8A	0.11786	-0.000514198
49	13	mC8A	0.119034	-0.00105061
49	14	mC8A	0.120362	-0.00143324
49	15	mC8A	0.122753	-0.00075201
49	16	mC8A	0.125835	0.000618657
49	17	mC8A	0.133346	0.0064193
49	18	mC8A	0.146558	0.017921
49	19	mC8A	0.171568	0.0412203
49	20	mC8A	0.217468	0.0854105
49	21	mC8A	0.298713	0.164945
49	22	mC8A	0.429078	0.293599
49	23	mC8A	0.613049	0.475859
49	24	mC8A	0.829665	0.690765
49	25	mC8A	1.04108	0.900474
49	26	mC8A	1.21771	1.07539
49	27	mC8A	1.34946	1.20543
49	28	mC8A	1.44546	1.29972
49	29	mC8A	1.51559	1.36814
49	30	mC8A	1.56822	1.41906
49	31	mC8A	1.60662	1.45575
49	32	mC8A	1.63629	1.48371
49	33	mC8A	1.65821	1.50392
49	34	mC8A	1.68012	1.52412
49	35	mC8A	1.69506	1.53735
49	36	mC8A	1.70678	1.54736
49	37	mC8A	1.71714	1.556
49	38	mC8A	1.72704	1.56419
49	39	mC8A	1.7344	1.56984
49	40	mC8A	1.74131	1.57504
50	1	mC8A	0.14224	-0.00463464
50	2	mC8A	0.144562	-0.00346067
50	3	mC8A	0.148415	-0.000755978
50	4	mC8A	0.15055	0.000231609
50	5	mC8A	0.152377	0.000910443
[truncated: 13,395 more rows]

## Sheet: Results
Block Type	384-Well Block
Calibration Background is expired	Yes
Calibration Background performed on	10-12-2018 11:47:46 PDT
Calibration FAM is expired	Yes
Calibration FAM performed on	10-23-2018 10:23:19 PDT
Calibration MELTDOCTOR is expired	Yes
Calibration MELTDOCTOR performed on	09-26-2017 21:22:46 PDT
Calibration NED is expired	Yes
Calibration NED performed on	10-23-2018 10:33:14 PDT
Calibration ROI is expired	Yes
Calibration ROI performed on	10-12-2018 09:37:21 PDT
Calibration ROX is expired	Yes
Calibration ROX performed on	10-23-2018 10:07:21 PDT
Calibration SYBR is expired	Yes
Calibration SYBR performed on	10-23-2018 09:57:53 PDT
Calibration TAMRA is expired	Yes
Calibration TAMRA performed on	10-23-2018 10:45:25 PDT
Calibration Uniformity is expired	Yes
Calibration Uniformity performed on	10-12-2018 10:06:59 PDT
Calibration VIC is expired	Yes
Calibration VIC performed on	10-23-2018 10:54:25 PDT
Chemistry	SYBR_GREEN
Date Created	09-05-2021 20:23:12 PDT
Experiment File Name	D:\NZZ\2021-09-05 185218.eds
Experiment Name	2021-09-05 185218
Experiment Run End Time	09-05-2021 13:39:19 PDT
Experiment Type	Comparative Cт (ΔΔCт)
Instrument Name	285880860
Instrument Serial Number	285880860
Instrument Type	QuantStudio 12K Flex
Passive Reference	ROX
Quantification Cycle Method	Ct
Signal Smoothing On	true
Stage/ Cycle where Analysis is performed	Stage 2, Step 2
Well	Well Position	Omit	Sample Name	Target Name	Task	Reporter	Quencher	RQ	RQ Min	RQ Max	CT	Ct Mean	Ct SE	Quantity	Delta Ct Mean	Delta Ct SE	Delta Delta Ct	Automatic Ct Threshold	Ct Threshold	Automatic Baseline	Baseline Start	Baseline End	Efficiency	Comments	Amp Score	Cq Conf	Tm1	Tm2	Tm3	MTP	EXPFAIL	PRFLOW	HIGHSD	NOAMP	THOLDFAIL	OUTLIERRG
13	A13	false	HepG2	hANGPTL6	UNKNOWN	SYBR	None				29.261	29.2077	0.0329624					true	0.171196	true	3	24			1.33148	0.970334	90.2238			N	N	N	N	N	N	N
14	A14	false	HepG2	hANGPTL6	UNKNOWN	SYBR	None				29.148	29.2077	0.0329624					true	0.171196	true	3	24			1.33711	0.975457	90.2238			N	N	N	N	N	N	N
15	A15	false	HepG2	hANGPTL6	UNKNOWN	SYBR	None				29.214	29.2077	0.0329624					true	0.171196	true	3	24			1.33162	0.970745	90.2238			N	N	N	N	N	N	N
16	A16	false	HepG2 2.15	hANGPTL6	UNKNOWN	SYBR	None				32.331	31.0305	0.654298					true	0.171196	true	3	27			1.32988	0.966938	90.0952			N	N	N	Y	N	N	N
17	A17	false	HepG2 2.15	hANGPTL6	UNKNOWN	SYBR	None				30.253	31.0305	0.654298					true	0.171196	true	3	25			1.33255	0.954925	90.0952			N	N	N	Y	N	N	N
18	A18	false	HepG2 2.15	hANGPTL6	UNKNOWN	SYBR	None				30.507	31.0305	0.654298					true	0.171196	true	3	25			1.33816	0.926908	90.0952			N	N	N	Y	N	N	N
19	A19	false	vec-7721	hANGPTL6	UNKNOWN	SYBR	None				31.252	30.7466	0.285611					true	0.171196	true	3	26			1.33515	0.969506	90.0952			N	N	N	N	N	N	N
20	A20	false	vec-7721	hANGPTL6	UNKNOWN	SYBR	None				30.264	30.7466	0.285611					true	0.171196	true	3	25			1.33153	0.969368	90.0952			N	N	N	N	N	N	N
21	A21	false	vec-7721	hANGPTL6	UNKNOWN	SYBR	None				30.724	30.7466	0.285611					true	0.171196	true	3	25			1.33783	0.968714	90.0952			N	N	N	N	N	N	N
22	A22	false	HBx-7721	hANGPTL6	UNKNOWN	SYBR	None				30.667	30.7049	0.08632					true	0.171196	true	3	25			1.33433	0.970196	90.0952			N	N	N	N	N	N	N
23	A23	false	HBx-7721	hANGPTL6	UNKNOWN	SYBR	None				30.87	30.7049	0.08632					true	0.171196	true	3	26			1.33036	0.96934	90.0952			N	N	N	N	N	N	N
24	A24	false	HBx-7721	hANGPTL6	UNKNOWN	SYBR	None				30.578	30.7049	0.08632					true	0.171196	true	3	25			1.33513	0.972988	90.0952			N	N	N	N	N	N	N
37	B13	false	HepG2	hPALM2	UNKNOWN	SYBR	None				27.51	27.6919	0.0996297					true	0.18335	true	3	22			1.33168	0.900026	80.8412			N	N	N	N	N	N	N
38	B14	false	HepG2	hPALM2	UNKNOWN	SYBR	None				27.854	27.6919	0.0996297					true	0.18335	true	3	22			1.3436	0.975585	80.7127			N	N	N	N	N	N	N
39	B15	false	HepG2	hPALM2	UNKNOWN	SYBR	None				27.711	27.6919	0.0996297					true	0.18335	true	3	22			1.33962	0.951885	80.7127			N	N	N	N	N	N	N
40	B16	false	HepG2 2.15	hPALM2	UNKNOWN	SYBR	None				23.963	23.9764	0.0068145					true	0.18335	true	3	19			1.34412	0.95591	80.8412			N	N	N	N	N	N	N
41	B17	false	HepG2 2.15	hPALM2	UNKNOWN	SYBR	None				23.985	23.9764	0.0068145					true	0.18335	true	3	19			1.33934	0.94636	80.8412			N	N	N	N	N	N	N
42	B18	false	HepG2 2.15	hPALM2	UNKNOWN	SYBR	None				23.981	23.9764	0.0068145					true	0.18335	true	3	19			1.34616	0.950873	80.8412			N	N	N	N	N	N	N
43	B19	false	vec-7721	hPALM2	UNKNOWN	SYBR	None				27.479	27.7915	0.164291					true	0.18335	true	3	22			1.33955	0.954658	80.7127			N	N	N	N	N	N	N
44	B20	false	vec-7721	hPALM2	UNKNOWN	SYBR	None				28.036	27.7915	0.164291					true	0.18335	true	3	23			1.34554	0.963926	80.7127			N	N	N	N	N	N	N
45	B21	false	vec-7721	hPALM2	UNKNOWN	SYBR	None				27.859	27.7915	0.164291					true	0.18335	true	3	22			1.34643	0.972901	80.7127			N	N	N	N	N	N	N
46	B22	false	HBx-7721	hPALM2	UNKNOWN	SYBR	None				28.049	28.004	0.0257127					true	0.18335	true	3	23			1.33592	0.922659	80.7127			N	N	N	N	N	N	N
47	B23	false	HBx-7721	hPALM2	UNKNOWN	SYBR	None				27.96	28.004	0.0257127					true	0.18335	true	3	23			1.33204	0.959632	80.7127			N	N	N	N	N	N	N
48	B24	false	HBx-7721	hPALM2	UNKNOWN	SYBR	None				28.003	28.004	0.0257127					true	0.18335	true	3	23			1.33637	0.957856	80.7127			N	N	N	N	N	N	N
61	C13	false	HepG2	hC8A	UNKNOWN	SYBR	None				25.492	25.4196	0.0634371					true	0.190267	true	3	20			1.35768	0.95856	85.3397			N	N	N	N	N	N	N
62	C14	false	HepG2	hC8A	UNKNOWN	SYBR	None				25.293	25.4196	0.0634371					true	0.190267	true	3	20			1.36117	0.968536	85.3397			N	N	N	N	N	N	N
63	C15	false	HepG2	hC8A	UNKNOWN	SYBR	None				25.474	25.4196	0.0634371					true	0.190267	true	3	20			1.35615	0.971089	85.3397			N	N	N	N	N	N	N
64	C16	false	HepG2 2.15	hC8A	UNKNOWN	SYBR	None				27.775	27.7274	0.0247246					true	0.190267	true	3	22			1.35952	0.950524	85.3397			N	N	N	N	N	N	N
65	C17	false	HepG2 2.15	hC8A	UNKNOWN	SYBR	None				27.716	27.7274	0.0247246					true	0.190267	true	3	22			1.36041	0.951364	85.3397			N	N	N	N	N	N	N
66	C18	false	HepG2 2.15	hC8A	UNKNOWN	SYBR	None				27.692	27.7274	0.0247246					true	0.190267	true	3	22			1.35534	0.963144	85.3397			N	N	N	N	N	N	N
67	C19	false	vec-7721	hC8A	UNKNOWN	SYBR	None				Undetermined	36.2089	1.44723					true	0.190267	true	3	39			0	0	61.4335	81.7409	92.2802	Y	Y	N	N	Y	N	N
68	C20	false	vec-7721	hC8A	UNKNOWN	SYBR	None				37.656	36.2089	1.44723					true	0.190267	true	3	32			1.19289	0.859277	74.8004			N	N	N	Y	N	N	N
69	C21	false	vec-7721	hC8A	UNKNOWN	SYBR	None				34.762	36.2089	1.44723					true	0.190267	true	3	29			1.34808	0.961541	77.8851			N	N	N	Y	N	N	N
70	C22	false	HBx-7721	hC8A	UNKNOWN	SYBR	None				35.428	35.0546	0.37324					true	0.190267	true	3	30			1.34027	0.960738	77.371			N	N	N	Y	N	N	N
71	C23	false	HBx-7721	hC8A	UNKNOWN	SYBR	None				34.681	35.0546	0.37324					true	0.190267	true	3	29			1.35738	0.966324	85.2112			N	N	N	Y	N	N	N
72	C24	false	HBx-7721	hC8A	UNKNOWN	SYBR	None				Undetermined	35.0546	0.37324					true	0.190267	true	3	39			0	0	61.1764			N	Y	N	N	Y	N	N
85	D13	false	HepG2	hTAT	UNKNOWN	SYBR	None				32.288	31.724	0.28208					true	0.0853402	true	3	28			1.24041	0.955641	82.5121			N	N	N	N	N	N	Y
86	D14	false	HepG2	hTAT	UNKNOWN	SYBR	None				31.44	31.724	0.28208					true	0.0853402	true	3	27			1.23951	0.967988	82.5121			N	N	N	N	N	N	N
87	D15	false	HepG2	hTAT	UNKNOWN	SYBR	None				31.444	31.724	0.28208					true	0.0853402	true	3	27			1.24102	0.971046	82.5121			N	N	N	N	N	N	N
88	D16	false	HepG2 2.15	hTAT	UNKNOWN	SYBR	None				32.666	32.3177	0.176184					true	0.0853402	true	3	28			1.24602	0.961626	82.5121			N	N	N	N	N	N	N
89	D17	false	HepG2 2.15	hTAT	UNKNOWN	SYBR	None				32.097	32.3177	0.176184					true	0.0853402	true	3	28			1.24758	0.979077	82.5121			N	N	N	N	N	N	N
90	D18	false	HepG2 2.15	hTAT	UNKNOWN	SYBR	None				32.19	32.3177	0.176184					true	0.0853402	true	3	28			1.24305	0.950918	82.5121			N	N	N	N	N	N	N
91	D19	false	vec-7721	hTAT	UNKNOWN	SYBR	None				31.78	31.5372	0.166923					true	0.0853402	true	3	27			1.2445	0.97047	82.5121			N	N	N	N	N	N	N
92	D20	false	vec-7721	hTAT	UNKNOWN	SYBR	None				31.615	31.5372	0.166923					true	0.0853402	true	3	27			1.2531	0.989001	82.5121			N	N	N	N	N	N	N
93	D21	false	vec-7721	hTAT	UNKNOWN	SYBR	None				31.217	31.5372	0.166923					true	0.0853402	true	3	27			1.25129	0.983409	82.5121			N	N	N	N	N	N	N
94	D22	false	HBx-7721	hTAT	UNKNOWN	SYBR	None				32.274	32.2947	0.108231					true	0.0853402	true	3	28			1.24403	0.960846	82.5121			N	N	N	N	N	N	N
95	D23	false	HBx-7721	hTAT	UNKNOWN	SYBR	None				32.119	32.2947	0.108231					true	0.0853402	true	3	28			1.24834	0.992565	82.5121			N	N	N	N	N	N	N
96	D24	false	HBx-7721	hTAT	UNKNOWN	SYBR	None				32.492	32.2947	0.108231					true	0.0853402	true	3	28			1.24409	0.961131	82.5121			N	N	N	N	N	N	N
109	E13	false	HepG2	hCyclophilion	UNKNOWN	SYBR	None				16.43	16.6655	0.167823					true	0.0975366	true	3	12			1.29582	0.933582	83.6688			N	N	N	N	N	N	N
110	E14	false	HepG2	hCyclophilion	UNKNOWN	SYBR	None				16.991	16.6655	0.167823					true	0.0975366	true	3	13			1.28074	0.829556	83.6688			N	N	N	N	N	N	N
111	E15	false	HepG2	hCyclophilion	UNKNOWN	SYBR	None				16.576	16.6655	0.167823					true	0.0975366	true	3	12			1.28871	0.922295	83.6688			N	N	N	N	N	N	N
112	E16	false	HepG2 2.15	hCyclophilion	UNKNOWN	SYBR	None				15.716	15.7271	0.015233					true	0.0975366	true	3	11			1.28849	0.943455	83.6688			N	N	N	N	N	N	N
113	E17	false	HepG2 2.15	hCyclophilion	UNKNOWN	SYBR	None				15.708	15.7271	0.015233					true	0.0975366	true	3	12			1.28866	0.945579	83.5403			N	N	N	N	N	N	N
114	E18	false	HepG2 2.15	hCyclophilion	UNKNOWN	SYBR	None				15.757	15.7271	0.015233					true	0.0975366	true	3	12			1.29392	0.947003	83.5403			N	N	N	N	N	N	N
115	E19	false	vec-7721	hCyclophilion	UNKNOWN	SYBR	None				15.006	14.9808	0.0627865					true	0.0975366	true	3	11			1.28998	0.917885	83.6688			N	N	N	N	N	N	N
116	E20	false	vec-7721	hCyclophilion	UNKNOWN	SYBR	None				15.075	14.9808	0.0627865					true	0.0975366	true	3	11			1.28844	0.875875	83.6688			N	N	N	N	N	N	N
117	E21	false	vec-7721	hCyclophilion	UNKNOWN	SYBR	None				14.862	14.9808	0.0627865					true	0.0975366	true	3	11			1.29746	0.950872	83.6688			N	N	N	N	N	N	N
118	E22	false	HBx-7721	hCyclophilion	UNKNOWN	SYBR	None				15.036	14.9659	0.053383					true	0.0975366	true	3	11			1.28985	0.944366	83.6688			N	N	N	N	N	N	N
119	E23	false	HBx-7721	hCyclophilion	UNKNOWN	SYBR	None				14.861	14.9659	0.053383					true	0.0975366	true	3	11			1.30187	0.93597	83.6688			N	N	N	N	N	N	N
120	E24	false	HBx-7721	hCyclophilion	UNKNOWN	SYBR	None				15.001	14.9659	0.053383					true	0.0975366	true	3	11			1.2939	0.913487	83.6688			N	N	N	N	N	N	N
133	F13	false	HepG2	hGNAL	UNKNOWN	SYBR	None				33.715	33.6115	0.254582					true	0.118525	true	3	29			1.31023	0.938933	78.6562			N	N	N	N	N	N	N
134	F14	false	HepG2	hGNAL	UNKNOWN	SYBR	None				33.128	33.6115	0.254582					true	0.118525	true	3	28			1.30829	0.958464	78.6562			N	N	N	N	N	N	N
135	F15	false	HepG2	hGNAL	UNKNOWN	SYBR	None				33.992	33.6115	0.254582					true	0.118525	true	3	29			1.3115	0.942064	78.6562			N	N	N	N	N	N	N
136	F16	false	HepG2 2.15	hGNAL	UNKNOWN	SYBR	None				33.219	34.6405	1.08201					true	0.118525	true	3	29			1.30454	0.920649	78.6562			N	N	N	Y	N	N	N
137	F17	false	HepG2 2.15	hGNAL	UNKNOWN	SYBR	None				36.764	34.6405	1.08201					true	0.118525	true	3	32			1.21261	0.555777	78.6562			N	N	N	Y	N	N	N
138	F18	false	HepG2 2.15	hGNAL	UNKNOWN	SYBR	None				33.939	34.6405	1.08201					true	0.118525	true	3	29			1.31087	0.941788	78.6562			N	N	N	Y	N	N	N
139	F19	false	vec-7721	hGNAL	UNKNOWN	SYBR	None				23.132	23.1016	0.0168008					true	0.118525	true	3	18			1.30654	0.957515	79.1703			N	N	N	N	N	N	N
140	F20	false	vec-7721	hGNAL	UNKNOWN	SYBR	None				23.099	23.1016	0.0168008					true	0.118525	true	3	18			1.30788	0.952924	79.1703			N	N	N	N	N	N	N
141	F21	false	vec-7721	hGNAL	UNKNOWN	SYBR	None				23.074	23.1016	0.0168008					true	0.118525	true	3	18			1.3125	0.955593	79.1703			N	N	N	N	N	N	N
142	F22	false	HBx-7721	hGNAL	UNKNOWN	SYBR	None				23.192	23.3102	0.0596328					true	0.118525	true	3	18			1.31486	0.954937	79.1703			N	N	N	N	N	N	N
143	F23	false	HBx-7721	hGNAL	UNKNOWN	SYBR	None				23.359	23.3102	0.0596328					true	0.118525	true	3	19			1.30114	0.96057	79.1703			N	N	N	N	N	N	N
144	F24	false	HBx-7721	hGNAL	UNKNOWN	SYBR	None				23.38	23.3102	0.0596328					true	0.118525	true	3	19			1.30319	0.956268	79.1703			N	N	N	N	N	N	N
157	G13	false	HepG2	hMAGEA6	UNKNOWN	SYBR	None				Undetermined							true	0.04	true	3	39			0	0	61.305			N	Y	N	N	Y	Y	N
158	G14	false	HepG2	hMAGEA6	UNKNOWN	SYBR	None				Undetermined							true	0.04	true	3	39			0	0	61.305			N	Y	N	N	Y	Y	N
159	G15	false	HepG2	hMAGEA6	UNKNOWN	SYBR	None				Undetermined							true	0.04	true	3	39			0	0	61.305			N	Y	N	N	Y	Y	N
160	G16	false	HepG2 2.15	hMAGEA6	UNKNOWN	SYBR	None				37.162	37.1623						true	0.04	true	3	34			0.962252	0.850058	87.3961			N	N	N	N	N	Y	N
161	G17	false	HepG2 2.15	hMAGEA6	UNKNOWN	SYBR	None				Undetermined	37.1623						true	0.04	true	3	39			0	0	61.305	83.1547		Y	Y	N	N	Y	Y	N
162	G18	false	HepG2 2.15	hMAGEA6	UNKNOWN	SYBR	None				Undetermined	37.1623						true	0.04	true	3	39			0	0	61.305	91.509		Y	Y	N	N	Y	Y	N
163	G19	false	vec-7721	hMAGEA6	UNKNOWN	SYBR	None				Undetermined							true	0.04	true	3	39			0	0	61.305	78.9133	92.0232	Y	Y	N	N	Y	Y	N
164	G20	false	vec-7721	hMAGEA6	UNKNOWN	SYBR	None				Undetermined							true	0.04	true	3	39			0	0	61.305	92.2802	78.2707	Y	Y	N	N	Y	Y	N
165	G21	false	vec-7721	hMAGEA6	UNKNOWN	SYBR	None				Undetermined							true	0.04	true	3	39			0	0	61.305	92.2802	79.4274	Y	Y	N	N	Y	Y	N
166	G22	false	HBx-7721	hMAGEA6	UNKNOWN	SYBR	None				Undetermined							true	0.04	true	3	39			0	0	61.1764			N	Y	N	N	Y	Y	N
167	G23	false	HBx-7721	hMAGEA6	UNKNOWN	SYBR	None				Undetermined							true	0.04	true	3	39			0	0	61.1764	91.8946		Y	Y	N	N	Y	Y	N
168	G24	false	HBx-7721	hMAGEA6	UNKNOWN	SYBR	None				Undetermined							true	0.04	true	3	39			0	0	61.305			N	Y	N	N	N	Y	N
181	H13	false	HepG2	hFAM110C	UNKNOWN	SYBR	None				26.492	26.6794	0.144774					true	0.176178	true	3	21			1.33123	0.962586	92.1517			N	N	N	N	N	N	N
182	H14	false	HepG2	hFAM110C	UNKNOWN	SYBR	None				26.582	26.6794	0.144774					true	0.176178	true	3	21			1.32668	0.953397	92.1517			N	N	N	N	N	N	N
183	H15	false	HepG2	hFAM110C	UNKNOWN	SYBR	None				26.964	26.6794	0.144774					true	0.176178	true	3	22			1.32385	0.956262	92.1517			N	N	N	N	N	N	N
184	H16	false	HepG2 2.15	hFAM110C	UNKNOWN	SYBR	None				30.247	30.4921	0.211923					true	0.176178	true	3	25			1.3341	0.964303	92.1517			N	N	N	N	N	N	N
185	H17	false	HepG2 2.15	hFAM110C	UNKNOWN	SYBR	None				30.315	30.4921	0.211923					true	0.176178	true	3	25			1.33007	0.969245	92.1517			N	N	N	N	N	N	N
186	H18	false	HepG2 2.15	hFAM110C	UNKNOWN	SYBR	None				30.914	30.4921	0.211923					true	0.176178	true	3	25			1.33053	0.956073	92.1517			N	N	N	N	N	N	N
187	H19	false	vec-7721	hFAM110C	UNKNOWN	SYBR	None				27.306	27.2243	0.0923071					true	0.176178	true	3	22			1.33193	0.957074	92.1517			N	N	N	N	N	N	N
188	H20	false	vec-7721	hFAM110C	UNKNOWN	SYBR	None				27.327	27.2243	0.0923071					true	0.176178	true	3	22			1.32911	0.96656	92.1517			N	N	N	N	N	N	N
189	H21	false	vec-7721	hFAM110C	UNKNOWN	SYBR	None				27.04	27.2243	0.0923071					true	0.176178	true	3	22			1.34012	0.957585	92.1517			N	N	N	N	N	N	N
190	H22	false	HBx-7721	hFAM110C	UNKNOWN	SYBR	None				27.409	27.3772	0.0171802					true	0.176178	true	3	22			1.33091	0.955707	92.1517			N	N	N	N	N	N	N
191	H23	false	HBx-7721	hFAM110C	UNKNOWN	SYBR	None				27.372	27.3772	0.0171802					true	0.176178	true	3	22			1.32644	0.944387	92.1517			N	N	N	N	N	N	N
192	H24	false	HBx-7721	hFAM110C	UNKNOWN	SYBR	None				27.35	27.3772	0.0171802					true	0.176178	true	3	22			1.32982	0.962111	92.1517			N	N	N	N	N	N	N
205	I13	false	HepG2	hRGS5	UNKNOWN	SYBR	None				28.976	28.9631	0.0159478					true	0.168723	true	3	24			1.32447	0.953103	79.6845			N	N	N	N	N	N	N
206	I14	false	HepG2	hRGS5	UNKNOWN	SYBR	None				28.931	28.9631	0.0159478					true	0.168723	true	3	24			1.32176	0.93017	79.6845			N	N	N	N	N	N	N
207	I15	false	HepG2	hRGS5	UNKNOWN	SYBR	None				28.982	28.9631	0.0159478					true	0.168723	true	3	24			1.31599	0.961899	79.6845			N	N	N	N	N	N	N
208	I16	false	HepG2 2.15	hRGS5	UNKNOWN	SYBR	None				27.861	27.7591	0.0566834					true	0.168723	true	3	23			1.3288	0.95486	79.813			N	N	N	N	N	N	N
209	I17	false	HepG2 2.15	hRGS5	UNKNOWN	SYBR	None				27.665	27.7591	0.0566834					true	0.168723	true	3	22			1.3294	0.965395	79.813			N	N	N	N	N	N	N
210	I18	false	HepG2 2.15	hRGS5	UNKNOWN	SYBR	None				27.752	27.7591	0.0566834					true	0.168723	true	3	23			1.32337	0.965695	79.813			N	N	N	N	N	N	N
211	I19	false	vec-7721	hRGS5	UNKNOWN	SYBR	None				27.253	27.22	0.0515165					true	0.168723	true	3	22			1.31497	0.96484	79.813			N	N	N	N	N	N	N
212	I20	false	vec-7721	hRGS5	UNKNOWN	SYBR	None				27.288	27.22	0.0515165					true	0.168723	true	3	22			1.32836	0.953124	79.813			N	N	N	N	N	N	N
213	I21	false	vec-7721	hRGS5	UNKNOWN	SYBR	None				27.119	27.22	0.0515165					true	0.168723	true	3	22			1.33263	0.948346	79.813			N	N	N	N	N	N	N
214	I22	false	HBx-7721	hRGS5	UNKNOWN	SYBR	None				27.467	27.4403	0.031385					true	0.168723	true	3	22			1.32733	0.954851	79.813			N	N	N	N	N	N	N
215	I23	false	HBx-7721	hRGS5	UNKNOWN	SYBR	None				27.378	27.4403	0.031385					true	0.168723	true	3	22			1.32095	0.956868	79.813			N	N	N	N	N	N	N
216	I24	false	HBx-7721	hRGS5	UNKNOWN	SYBR	None				27.476	27.4403	0.031385					true	0.168723	true	3	22			1.31969	0.954601	79.9415			N	N	N	N	N	N	N
229	J13	false	HepG2	hCPEB3	UNKNOWN	SYBR	None				29.785	29.8821	0.128796					true	0.173343	true	3	24			1.30119	0.963669	91.252			N	N	N	N	N	N	N
230	J14	false	HepG2	hCPEB3	UNKNOWN	SYBR	None				29.724	29.8821	0.128796					true	0.173343	true	3	24			1.31411	0.952364	91.252	83.6688		Y	N	N	N	N	N	N
231	J15	false	HepG2	hCPEB3	UNKNOWN	SYBR	None				30.137	29.8821	0.128796					true	0.173343	true	3	25			1.3093	0.960592	91.252			N	N	N	N	N	N	N
232	J16	false	HepG2 2.15	hCPEB3	UNKNOWN	SYBR	None				29.209	29.3068	0.0669659					true	0.173343	true	3	24			1.30732	0.950858	91.252			N	N	N	N	N	N	N
233	J17	false	HepG2 2.15	hCPEB3	UNKNOWN	SYBR	None				29.276	29.3068	0.0669659					true	0.173343	true	3	24			1.30259	0.96151	91.252			N	N	N	N	N	N	N
234	J18	false	HepG2 2.15	hCPEB3	UNKNOWN	SYBR	None				29.435	29.3068	0.0669659					true	0.173343	true	3	24			1.30916	0.959189	91.252			N	N	N	N	N	N	N
235	J19	false	vec-7721	hCPEB3	UNKNOWN	SYBR	None				28.546	28.3849	0.0805436					true	0.173343	true	3	23			1.30227	0.910006	91.252			N	N	N	N	N	N	N
236	J20	false	vec-7721	hCPEB3	UNKNOWN	SYBR	None				28.303	28.3849	0.0805436					true	0.173343	true	3	23			1.30166	0.958387	91.252			N	N	N	N	N	N	N
237	J21	false	vec-7721	hCPEB3	UNKNOWN	SYBR	None				28.305	28.3849	0.0805436					true	0.173343	true	3	23			1.30682	0.954197	91.252			N	N	N	N	N	N	N
238	J22	false	HBx-7721	hCPEB3	UNKNOWN	SYBR	None				28.247	28.4547	0.114678					true	0.173343	true	3	23			1.30375	0.94978	91.252			N	N	N	N	N	N	N
239	J23	false	HBx-7721	hCPEB3	UNKNOWN	SYBR	None				28.474	28.4547	0.114678					true	0.173343	true	3	23			1.29428	0.943884	91.252			N	N	N	N	N	N	N
240	J24	false	HBx-7721	hCPEB3	UNKNOWN	SYBR	None				28.643	28.4547	0.114678					true	0.173343	true	3	23			1.29424	0.930465	91.252			N	N	N	N	N	N	N
253	K13	false	HepG2	hALDOB	UNKNOWN	SYBR	None				28.541	28.6035	0.0586865					true	0.107952	true	3	24			1.28815	0.949621	82.1265			N	N	N	N	N	N	N
254	K14	false	HepG2	hALDOB	UNKNOWN	SYBR	None				28.549	28.6035	0.0586865					true	0.107952	true	3	24			1.28649	0.935527	82.1265			N	N	N	N	N	N	N
255	K15	false	HepG2	hALDOB	UNKNOWN	SYBR	None				28.721	28.6035	0.0586865					true	0.107952	true	3	24			1.28325	0.965641	82.1265			N	N	N	N	N	N	N
256	K16	false	HepG2 2.15	hALDOB	UNKNOWN	SYBR	None				27.358	27.2417	0.0756213					true	0.107952	true	3	23			1.29043	0.951165	82.1265			N	N	N	N	N	N	N
257	K17	false	HepG2 2.15	hALDOB	UNKNOWN	SYBR	None				27.267	27.2417	0.0756213					true	0.107952	true	3	23			1.2896	0.95899	82.1265			N	N	N	N	N	N	N
258	K18	false	HepG2 2.15	hALDOB	UNKNOWN	SYBR	None				27.1	27.2417	0.0756213					true	0.107952	true	3	23			1.29382	0.963263	82.1265			N	N	N	N	N	N	N
259	K19	false	vec-7721	hALDOB	UNKNOWN	SYBR	None				32.018	31.5634	0.254556					true	0.107952	true	3	27			1.27948	0.954276	82.1265			N	N	N	N	N	N	N
260	K20	false	vec-7721	hALDOB	UNKNOWN	SYBR	None				31.534	31.5634	0.254556					true	0.107952	true	3	27			1.28363	0.956158	82.1265			N	N	N	N	N	N	N
261	K21	false	vec-7721	hALDOB	UNKNOWN	SYBR	None				31.138	31.5634	0.254556					true	0.107952	true	3	27			1.2819	0.942424	82.1265			N	N	N	N	N	N	N
262	K22	false	HBx-7721	hALDOB	UNKNOWN	SYBR	None				31.43	31.5052	0.0406875					true	0.107952	true	3	27			1.27861	0.948701	82.1265			N	N	N	N	N	N	N
263	K23	false	HBx-7721	hALDOB	UNKNOWN	SYBR	None				31.57	31.5052	0.0406875					true	0.107952	true	3	27			1.25998	0.792997	82.1265			N	N	N	N	N	N	N
264	K24	false	HBx-7721	hALDOB	UNKNOWN	SYBR	None				31.515	31.5052	0.0406875					true	0.107952	true	3	27			1.2748	0.957074	82.1265			N	N	N	N	N	N	N
277	L13	false	HepG2	hALDH8A1	UNKNOWN	SYBR	None				29.693	29.6117	0.0881561					true	0.110103	true	3	25			1.24962	0.952634	89.4526			N	N	N	N	N	N	N
278	L14	false	HepG2	hALDH8A1	UNKNOWN	SYBR	None				29.707	29.6117	0.0881561					true	0.110103	true	3	25			1.24319	0.951966	89.4526			N	N	N	N	N	N	N
279	L15	false	HepG2	hALDH8A1	UNKNOWN	SYBR	None				29.436	29.6117	0.0881561					true	0.110103	true	3	25			1.2399	0.970346	89.4526			N	N	N	N	N	N	N
280	L16	false	HepG2 2.15	hALDH8A1	UNKNOWN	SYBR	None				29.491	29.5357	0.213051					true	0.110103	true	3	25			1.24576	0.96229	89.4526			N	N	N	N	N	N	N
281	L17	false	HepG2 2.15	hALDH8A1	UNKNOWN	SYBR	None				29.191	29.5357	0.213051					true	0.110103	true	3	25			1.2474	0.965333	89.4526			N	N	N	N	N	N	N
282	L18	false	HepG2 2.15	hALDH8A1	UNKNOWN	SYBR	None				29.925	29.5357	0.213051					true	0.110103	true	3	25			1.25359	0.954527	89.4526	84.6971		Y	N	N	N	N	N	N
283	L19	false	vec-7721	hALDH8A1	UNKNOWN	SYBR	None				32.703	32.1227	0.329804					true	0.110103	true	3	28			1.24638	0.956249	89.4526	84.8256		Y	N	N	Y	N	N	N
284	L20	false	vec-7721	hALDH8A1	UNKNOWN	SYBR	None				32.105	32.1227	0.329804					true	0.110103	true	3	27			1.23877	0.968497	89.4526	84.8256	76.2142	Y	N	N	Y	N	N	N
285	L21	false	vec-7721	hALDH8A1	UNKNOWN	SYBR	None				31.56	32.1227	0.329804					true	0.110103	true	3	27			1.24507	0.964993	89.4526	84.6971		Y	N	N	Y	N	N	N
286	L22	false	HBx-7721	hALDH8A1	UNKNOWN	SYBR	None				31.788	31.7368	0.0951087					true	0.110103	true	3	27			1.24291	0.959577	89.4526	84.6971		Y	N	N	N	N	N	N
287	L23	false	HBx-7721	hALDH8A1	UNKNOWN	SYBR	None				31.87	31.7368	0.0951087					true	0.110103	true	3	27			1.23271	0.961134	89.4526	84.6971		Y	N	N	N	N	N	N
288	L24	false	HBx-7721	hALDH8A1	UNKNOWN	SYBR	None				31.553	31.7368	0.0951087					true	0.110103	true	3	27			1.23595	0.957366	89.4526	84.6971		Y	N	N	N	N	N	N
301	M13	false	HepG2	HBx	UNKNOWN	SYBR	None				32.772	32.6756	0.598695					true	0.173954	true	3	27			1.34137	0.952315	80.9697			N	N	N	Y	N	N	N
302	M14	false	HepG2	HBx	UNKNOWN	SYBR	None				33.661	32.6756	0.598695					true	0.173954	true	3	28			1.34366	0.947628	81.0983			N	N	N	Y	N	N	N
303	M15	false	HepG2	HBx	UNKNOWN	SYBR	None				31.594	32.6756	0.598695					true	0.173954	true	3	26			1.33472	0.953456	80.9697			N	N	N	Y	N	N	N
304	M16	false	HepG2 2.15	HBx	UNKNOWN	SYBR	None				18.512	18.4335	0.039418					true	0.173954	true	3	14			1.34365	0.920037	80.3271			N	N	N	N	N	N	N
305	M17	false	HepG2 2.15	HBx	UNKNOWN	SYBR	None				18.391	18.4335	0.039418					true	0.173954	true	3	13			1.35419	0.95306	80.3271			N	N	N	N	N	N	N
306	M18	false	HepG2 2.15	HBx	UNKNOWN	SYBR	None				18.397	18.4335	0.039418					true	0.173954	true	3	13			1.35227	0.942146	80.3271			N	N	N	N	N	N	N
307	M19	false	vec-7721	HBx	UNKNOWN	SYBR	None				30.1	29.8083	0.389892					true	0.173954	true	3	25			1.34604	0.954143	80.7127			N	N	N	Y	N	N	N
308	M20	false	vec-7721	HBx	UNKNOWN	SYBR	None				30.289	29.8083	0.389892					true	0.173954	true	3	25			1.34289	0.958981	80.8412			N	N	N	Y	N	N	N
309	M21	false	vec-7721	HBx	UNKNOWN	SYBR	None				29.036	29.8083	0.389892					true	0.173954	true	3	24			1.35633	0.955741	80.1986			N	N	N	Y	N	N	N
310	M22	false	HBx-7721	HBx	UNKNOWN	SYBR	None				14.84	14.8506	0.0195776					true	0.173954	true	3	10			1.34021	0.943317	81.3553			N	N	N	N	N	N	N
311	M23	false	HBx-7721	HBx	UNKNOWN	SYBR	None				14.823	14.8506	0.0195776					true	0.173954	true	3	10			1.34241	0.944241	81.3553			N	N	N	N	N	N	N
312	M24	false	HBx-7721	HBx	UNKNOWN	SYBR	None				14.889	14.8506	0.0195776					true	0.173954	true	3	10			1.33735	0.948698	81.3553			N	N	N	N	N	N	N
Analysis Type	Singleplex
Endogenous Control	mCyclophilion
RQ Min/Max Confidence Level	95.0
Reference Sample	m-vec-1

## Sheet: Melt Curve Raw Data
Block Type	384-Well Block
Calibration Background is expired	Yes
Calibration Background performed on	10-12-2018 11:47:46 PDT
Calibration FAM is expired	Yes
Calibration FAM performed on	10-23-2018 10:23:19 PDT
Calibration MELTDOCTOR is expired	Yes
Calibration MELTDOCTOR performed on	09-26-2017 21:22:46 PDT
Calibration NED is expired	Yes
Calibration NED performed on	10-23-2018 10:33:14 PDT
Calibration ROI is expired	Yes
Calibration ROI performed on	10-12-2018 09:37:21 PDT
Calibration ROX is expired	Yes
Calibration ROX performed on	10-23-2018 10:07:21 PDT
Calibration SYBR is expired	Yes
Calibration SYBR performed on	10-23-2018 09:57:53 PDT
Calibration TAMRA is expired	Yes
Calibration TAMRA performed on	10-23-2018 10:45:25 PDT
Calibration Uniformity is expired	Yes
Calibration Uniformity performed on	10-12-2018 10:06:59 PDT
Calibration VIC is expired	Yes
Calibration VIC performed on	10-23-2018 10:54:25 PDT
Chemistry	SYBR_GREEN
Date Created	09-05-2021 20:23:12 PDT
Experiment File Name	D:\NZZ\2021-09-05 185218.eds
Experiment Name	2021-09-05 185218
Experiment Run End Time	09-05-2021 13:39:19 PDT
Experiment Type	Comparative Cт (ΔΔCт)
Instrument Name	285880860
Instrument Serial Number	285880860
Instrument Type	QuantStudio 12K Flex
Passive Reference	ROX
Quantification Cycle Method	Ct
Signal Smoothing On	true
Stage/ Cycle where Analysis is performed	Stage 2, Step 2
Well	Well Position	Reading	Temperature	Fluorescence	Derivative
1	A1	1	60.1482	1.81089	0.0979151
1	A1	2	60.4053	1.80603	0.096244
1	A1	3	60.6623	1.80485	0.0949386
1	A1	4	60.9194	1.79727	0.0943967
1	A1	5	61.1764	1.78495	0.0948188
1	A1	6	61.4335	1.7734	0.0961857
1	A1	7	61.6905	1.7692	0.0982893
1	A1	8	61.9476	1.75645	0.10078
1	A1	9	62.2046	1.74903	0.103216
1	A1	10	62.4617	1.73757	0.105145
1	A1	11	62.7188	1.724	0.106234
1	A1	12	62.9758	1.71287	0.106388
1	A1	13	63.2329	1.7025	0.105798
1	A1	14	63.4899	1.69423	0.104868
1	A1	15	63.747	1.67755	0.104056
1	A1	16	64.004	1.67576	0.103689
1	A1	17	64.2611	1.6612	0.103862
1	A1	18	64.5182	1.65538	0.104448
1	A1	19	64.7752	1.64277	0.105214
1	A1	20	65.0323	1.62621	0.105946
1	A1	21	65.2893	1.62012	0.106502
1	A1	22	65.5464	1.6153	0.106784
1	A1	23	65.8034	1.59723	0.106706
1	A1	24	66.0605	1.58534	0.106208
1	A1	25	66.3175	1.58077	0.105318
1	A1	26	66.5746	1.56512	0.104199
1	A1	27	66.8317	1.55191	0.103108
1	A1	28	67.0887	1.55004	0.102302
1	A1	29	67.3458	1.53893	0.101947
1	A1	30	67.6028	1.52238	0.102079
1	A1	31	67.8599	1.51716	0.102629
1	A1	32	68.1169	1.5082	0.103467
1	A1	33	68.374	1.49552	0.104435
1	A1	34	68.6311	1.48459	0.105374
1	A1	35	68.8881	1.47654	0.106134
1	A1	36	69.1452	1.46133	0.106593
1	A1	37	69.4022	1.45545	0.106673
1	A1	38	69.6593	1.4412	0.106374
1	A1	39	69.9163	1.432	0.105817
1	A1	40	70.1734	1.41878	0.105247
1	A1	41	70.4304	1.41138	0.104994
1	A1	42	70.6875	1.39917	0.105341
1	A1	43	70.9446	1.39052	0.106362
1	A1	44	71.2016	1.38306	0.107821
1	A1	45	71.4587	1.37152	0.109234
1	A1	46	71.7157	1.3537	0.110056
1	A1	47	71.9728	1.34657	0.109928
1	A1	48	72.2298	1.33444	0.108827
1	A1	49	72.4869	1.31953	0.107051
1	A1	50	72.7439	1.3122	0.105049
1	A1	51	73.001	1.30536	0.10321
1	A1	52	73.2581	1.29257	0.101738
1	A1	53	73.5151	1.28211	0.100633
1	A1	54	73.7722	1.27281	0.0998008
1	A1	55	74.0292	1.26211	0.0991549
1	A1	56	74.2863	1.25317	0.0986745
1	A1	57	74.5433	1.24291	0.098383
1	A1	58	74.8004	1.23297	0.0982919
1	A1	59	75.0574	1.22513	0.098374
1	A1	60	75.3145	1.21487	0.0985622
1	A1	61	75.5716	1.20111	0.0987834
1	A1	62	75.8286	1.19417	0.0989784
1	A1	63	76.0857	1.18616	0.0990955
1	A1	64	76.3427	1.17384	0.0990907
1	A1	65	76.5998	1.16286	0.0989375
1	A1	66	76.8568	1.15503	0.098655
1	A1	67	77.1139	1.14172	0.0983099
1	A1	68	77.371	1.13663	0.0979822
1	A1	69	77.628	1.12541	0.0977136
1	A1	70	77.8851	1.11382	0.0974854
1	A1	71	78.1421	1.10573	0.0972439
1	A1	72	78.3992	1.09709	0.0969594
1	A1	73	78.6562	1.08292	0.0966649
1	A1	74	78.9133	1.07578	0.096439
1	A1	75	79.1703	1.06868	0.0963435
1	A1	76	79.4274	1.05786	0.0963618
1	A1	77	79.6845	1.04634	0.0963911
1	A1	78	79.9415	1.03744	0.0962999
1	A1	79	80.1986	1.0297	0.0960152
1	A1	80	80.4556	1.01542	0.0955762
1	A1	81	80.7127	1.00792	0.0951166
1	A1	82	80.9697	1.00182	0.0947895
1	A1	83	81.2268	0.98918	0.0946804
1	A1	84	81.4839	0.982197	0.0947716
1	A1	85	81.7409	0.97119	0.0949713
1	A1	86	81.998	0.959478	0.0951684
1	A1	87	82.255	0.953692	0.095273
1	A1	88	82.5121	0.943071	0.095227
1	A1	89	82.7691	0.933995	0.0950079
1	A1	90	83.0262	0.921206	0.0946476
1	A1	91	83.2832	0.913669	0.0942549
1	A1	92	83.5403	0.905582	0.0940053
1	A1	93	83.7974	0.895451	0.0940993
1	A1	94	84.0544	0.885642	0.0947306
1	A1	95	84.3115	0.880007	0.0961026
1	A1	96	84.5685	0.86618	0.0984926
1	A1	97	84.8256	0.855349	0.102287
1	A1	98	85.0826	0.850942	0.1079
1	A1	99	85.3397	0.836545	0.115569
1	A1	100	85.5968	0.829414	0.125182
1	A1	101	85.8538	0.817284	0.136422
1	A1	102	86.1109	0.801959	0.149416
1	A1	103	86.3679	0.777629	0.165752
1	A1	104	86.625	0.75384	0.189275
1	A1	105	86.882	0.74226	0.225781
1	A1	106	87.1391	0.730026	0.28112
1	A1	107	87.3961	0.712796	0.358033
1	A1	108	87.6532	0.680794	0.453062
1	A1	109	87.9103	0.596546	0.555191
1	A1	110	88.1673	0.477414	0.64728
1	A1	111	88.4244	0.406049	0.710168
1	A1	112	88.6814	0.300715	0.728238
1	A1	113	88.9385	0.145385	0.694556
1	A1	114	89.1955	0.0918134	0.613616
1	A1	115	89.4526	0.0893507	0.50032
1	A1	116	89.7096	0.0894638	0.375272
1	A1	117	89.9667	0.0884243	0.258268
1	A1	118	90.2238	0.0881155	0.162849
1	A1	119	90.4808	0.0873701	0.0941309
1	A1	120	90.7379	0.0870071	0.0501132
1	A1	121	90.9949	0.0870398	0.0249328
1	A1	122	91.252	0.0865056	0.0120542
1	A1	123	91.509	0.087014	0.00619241
1	A1	124	91.7661	0.0868335	0.00385653
1	A1	125	92.0232	0.0861232	0.00306144
1	A1	126	92.2802	0.0853011	0.00280284
1	A1	127	92.5373	0.0854137	0.00263133
1	A1	128	92.7943	0.0848699	0.00239661
1	A1	129	93.0514	0.0845353	0.00210505
1	A1	130	93.3084	0.0855898	0.00182436
1	A1	131	93.5655	0.0846562	0.00161057
1	A1	132	93.8225	0.0851209	0.00146709
1	A1	133	94.0796	0.0842433	0.00134697
1	A1	134	94.3367	0.0839061	0.00118992
1	A1	135	94.5937	0.0842305	0.00096432
1	A1	136	94.8508	0.0839959	0.000686221
2	A2	1	60.1482	1.80368	0.101896
2	A2	2	60.4053	1.79598	0.101886
2	A2	3	60.6623	1.78978	0.102329
2	A2	4	60.9194	1.7864	0.103164
2	A2	5	61.1764	1.7698	0.104165
2	A2	6	61.4335	1.75669	0.105055
2	A2	7	61.6905	1.74886	0.105647
2	A2	8	61.9476	1.73629	0.105912
2	A2	9	62.2046	1.72902	0.105947
2	A2	10	62.4617	1.7149	0.105882
2	A2	11	62.7188	1.70262	0.105805
2	A2	12	62.9758	1.70015	0.105734
2	A2	13	63.2329	1.68169	0.105624
2	A2	14	63.4899	1.67041	0.105389
2	A2	15	63.747	1.66491	0.104929
2	A2	16	64.004	1.653	0.104176
2	A2	17	64.2611	1.64064	0.103155
2	A2	18	64.5182	1.62627	0.102051
2	A2	19	64.7752	1.6227	0.101208
2	A2	20	65.0323	1.60935	0.101032
2	A2	21	65.2893	1.59957	0.101808
2	A2	22	65.5464	1.59147	0.103537
2	A2	23	65.8034	1.58568	0.105858
2	A2	24	66.0605	1.56845	0.108158
2	A2	25	66.3175	1.55807	0.109796
2	A2	26	66.5746	1.54736	0.110358
2	A2	27	66.8317	1.53245	0.109809
2	A2	28	67.0887	1.51938	0.108461
2	A2	29	67.3458	1.51227	0.106804
2	A2	30	67.6028	1.50357	0.105289
2	A2	31	67.8599	1.49108	0.104212
2	A2	32	68.1169	1.48145	0.103713
2	A2	33	68.374	1.46629	0.103819
2	A2	34	68.6311	1.46228	0.104471
2	A2	35	68.8881	1.45146	0.105493
2	A2	36	69.1452	1.43981	0.106589
2	A2	37	69.4022	1.42743	0.107412
2	A2	38	69.6593	1.41645	0.107693
2	A2	39	69.9163	1.40306	0.107334
2	A2	40	70.1734	1.39505	0.106427
2	A2	41	70.4304	1.38205	0.105161
2	A2	42	70.6875	1.373	0.103735
2	A2	43	70.9446	1.36416	0.102312
2	A2	44	71.2016	1.3491	0.101017
2	A2	45	71.4587	1.34168	0.0999739
2	A2	46	71.7157	1.33215	0.0993053
2	A2	47	71.9728	1.32306	0.0991139
2	A2	48	72.2298	1.31116	0.0994374
2	A2	49	72.4869	1.30152	0.100218
2	A2	50	72.7439	1.29308	0.101278
2	A2	51	73.001	1.28167	0.102325
2	A2	52	73.2581	1.27248	0.103021
2	A2	53	73.5151	1.25941	0.103106
2	A2	54	73.7722	1.24855	0.102534
2	A2	55	74.0292	1.23463	0.101513
2	A2	56	74.2863	1.22854	0.10041
2	A2	57	74.5433	1.21927	0.0995377
2	A2	58	74.8004	1.20987	0.0989877
2	A2	59	75.0574	1.20109	0.0986161
2	A2	60	75.3145	1.18548	0.098196
2	A2	61	75.5716	1.17867	0.097617
2	A2	62	75.8286	1.16497	0.0969721
2	A2	63	76.0857	1.15848	0.096479
2	A2	64	76.3427	1.15282	0.0963053
2	A2	65	76.5998	1.1391	0.0964541
2	A2	66	76.8568	1.12948	0.0967794
2	A2	67	77.1139	1.11787	0.0971091
2	A2	68	77.371	1.11047	0.0973551
2	A2	69	77.628	1.09826	0.097533
2	A2	70	77.8851	1.09201	0.0976989
2	A2	71	78.1421	1.07775	0.097867
2	A2	72	78.3992	1.07137	0.0979617
2	A2	73	78.6562	1.05941	0.0978387
2	A2	74	78.9133	1.04917	0.0973503
2	A2	75	79.1703	1.04028	0.0964351
2	A2	76	79.4274	1.02753	0.0951799
2	A2	77	79.6845	1.01929	0.0938256
2	A2	78	79.9415	1.01008	0.0926919
2	A2	79	80.1986	1.00162	0.0920543
2	A2	80	80.4556	0.995618	0.0920377
2	A2	81	80.7127	0.982117	0.0925866
2	A2	82	80.9697	0.974582	0.093514
2	A2	83	81.2268	0.962517	0.0945893
2	A2	84	81.4839	0.957195	0.0956115
2	A2	85	81.7409	0.944916	0.0964397
2	A2	86	81.998	0.932749	0.0970019
2	A2	87	82.255	0.92415	0.097277
2	A2	88	82.5121	0.916194	0.0972651
2	A2	89	82.7691	0.905	0.0969591
2	A2	90	83.0262	0.893839	0.0963467
2	A2	91	83.2832	0.885701	0.095454
2	A2	92	83.5403	0.873536	0.094404
2	A2	93	83.7974	0.864905	0.0934532
2	A2	94	84.0544	0.857325	0.0929733
2	A2	95	84.3115	0.847569	0.0934029
2	A2	96	84.5685	0.839421	0.0951858
2	A2	97	84.8256	0.828024	0.0987102
2	A2	98	85.0826	0.821076	0.104224
2	A2	99	85.3397	0.810614	0.111746
2	A2	100	85.5968	0.798383	0.121081
2	A2	101	85.8538	0.788744	0.132101
2	A2	102	86.1109	0.772494	0.145424
2	A2	103	86.3679	0.751826	0.163307
2	A2	104	86.625	0.728184	0.190161
2	A2	105	86.882	0.716226	0.231902
2	A2	106	87.1391	0.704783	0.293737
2	A2	107	87.3961	0.684929	0.376879
2	A2	108	87.6532	0.644506	0.475714
2	A2	109	87.9103	0.552596	0.577154
2	A2	110	88.1673	0.416889	0.663049
2	A2	111	88.4244	0.341264	0.715052
2	A2	112	88.6814	0.248019	0.720166
2	A2	113	88.9385	0.105037	0.674929
2	A2	114	89.1955	0.0566248	0.586716
2	A2	115	89.4526	0.0548705	0.471596
2	A2	116	89.7096	0.054103	0.349421
2	A2	117	89.9667	0.0543951	0.238012
2	A2	118	90.2238	0.053219	0.148778
2	A2	119	90.4808	0.0529276	0.0853381
2	A2	120	90.7379	0.0524069	0.045072
2	A2	121	90.9949	0.0526907	0.0221703
2	A2	122	91.252	0.0523124	0.0104712
2	A2	123	91.509	0.0523864	0.00510684
2	A2	124	91.7661	0.0523801	0.00292328
2	A2	125	92.0232	0.0517907	0.00217279
2	A2	126	92.2802	0.0516909	0.00200216
2	A2	127	92.5373	0.0517812	0.0020303
2	A2	128	92.7943	0.0513012	0.00209093
2	A2	129	93.0514	0.0508854	0.00210642
2	A2	130	93.3084	0.0508103	0.00203818
2	A2	131	93.5655	0.0505871	0.00187287
2	A2	132	93.8225	0.0502039	0.00162048
2	A2	133	94.0796	0.0502255	0.00131119
2	A2	134	94.3367	0.0503304	0.000986859
2	A2	135	94.5937	0.0502345	0.000688328
2	A2	136	94.8508	0.0502496	0.000444117
3	A3	1	60.1482	1.84015	0.111664
3	A3	2	60.4053	1.83062	0.113332
3	A3	3	60.6623	1.81869	0.115028
3	A3	4	60.9194	1.80522	0.116351
3	A3	5	61.1764	1.79725	0.11701
3	A3	6	61.4335	1.78483	0.116902
3	A3	7	61.6905	1.76594	0.116108
3	A3	8	61.9476	1.76178	0.114836
3	A3	9	62.2046	1.74804	0.113344
3	A3	10	62.4617	1.73693	0.111876
3	A3	11	62.7188	1.72496	0.110636
3	A3	12	62.9758	1.71432	0.109772
3	A3	13	63.2329	1.70507	0.10937
3	A3	14	63.4899	1.69402	0.109451
3	A3	15	63.747	1.68259	0.109959
3	A3	16	64.004	1.67014	0.11077
3	A3	17	64.2611	1.66297	0.111697
3	A3	18	64.5182	1.64935	0.112523
3	A3	19	64.7752	1.63723	0.113038
3	A3	20	65.0323	1.62558	0.113119
3	A3	21	65.2893	1.61553	0.112784
3	A3	22	65.5464	1.60374	0.112233
3	A3	23	65.8034	1.58827	0.11178
3	A3	24	66.0605	1.58057	0.11172
3	A3	25	66.3175	1.57358	0.112151
3	A3	26	66.5746	1.55832	0.112894
3	A3	27	66.8317	1.55167	0.113552
3	A3	28	67.0887	1.53422	0.113706
3	A3	29	67.3458	1.51847	0.11312
3	A3	30	67.6028	1.51566	0.111833
3	A3	31	67.8599	1.50031	0.110137
3	A3	32	68.1169	1.48903	0.108452
3	A3	33	68.374	1.47788	0.107191
3	A3	34	68.6311	1.4677	0.106633
3	A3	35	68.8881	1.4627	0.106828
3	A3	36	69.1452	1.44788	0.107605
3	A3	37	69.4022	1.43896	0.108656
3	A3	38	69.6593	1.42528	0.109682
3	A3	39	69.9163	1.41114	0.110471
3	A3	40	70.1734	1.40666	0.11089
3	A3	41	70.4304	1.39293	0.11082
3	A3	42	70.6875	1.38284	0.110166
3	A3	43	70.9446	1.36652	0.108936
3	A3	44	71.2016	1.35829	0.107342
3	A3	45	71.4587	1.34427	0.105786
3	A3	46	71.7157	1.33827	0.104704
3	A3	47	71.9728	1.33063	0.104367
3	A3	48	72.2298	1.31792	0.10477
3	A3	49	72.4869	1.30467	0.105669
3	A3	50	72.7439	1.29748	0.106715
3	A3	51	73.001	1.28505	0.107579
3	A3	52	73.2581	1.27246	0.108018
3	A3	53	73.5151	1.26428	0.107891
3	A3	54	73.7722	1.25239	0.107183
3	A3	55	74.0292	1.23857	0.10603
3	A3	56	74.2863	1.22746	0.104698
3	A3	57	74.5433	1.22023	0.103482
3	A3	58	74.8004	1.21043	0.102579
3	A3	59	75.0574	1.20309	0.102016
3	A3	60	75.3145	1.18708	0.101689
3	A3	61	75.5716	1.1776	0.101484
3	A3	62	75.8286	1.16653	0.101369
3	A3	63	76.0857	1.16328	0.101392
3	A3	64	76.3427	1.14702	0.101603
3	A3	65	76.5998	1.13689	0.101973
3	A3	66	76.8568	1.12933	0.10236
3	A3	67	77.1139	1.11743	0.102522
3	A3	68	77.371	1.10826	0.102202
3	A3	69	77.628	1.09743	0.101257
3	A3	70	77.8851	1.08269	0.099784
3	A3	71	78.1421	1.07305	0.098148
3	A3	72	78.3992	1.06651	0.0968414
3	A3	73	78.6562	1.06024	0.0962358
3	A3	74	78.9133	1.04875	0.0963731
3	A3	75	79.1703	1.04067	0.0969521
3	A3	76	79.4274	1.02716	0.0975154
3	A3	77	79.6845	1.01603	0.0977109
3	A3	78	79.9415	1.00787	0.0974589
3	A3	79	80.1986	0.997817	0.0969363
3	A3	80	80.4556	0.988295	0.0964173
3	A3	81	80.7127	0.979824	0.0961022
3	A3	82	80.9697	0.971435	0.0960272
3	A3	83	81.2268	0.958295	0.0960936
3	A3	84	81.4839	0.950311	0.0961607
3	A3	85	81.7409	0.940108	0.0961321
3	A3	86	81.998	0.930617	0.0959916
3	A3	87	82.255	0.921991	0.0957863
3	A3	88	82.5121	0.910055	0.0955932
3	A3	89	82.7691	0.902769	0.0954847
3	A3	90	83.0262	0.892035	0.0955071
3	A3	91	83.2832	0.88276	0.0956699
3	A3	92	83.5403	0.874285	0.095954
3	A3	93	83.7974	0.862964	0.0963526
3	A3	94	84.0544	0.853741	0.0969359
3	A3	95	84.3115	0.843343	0.0979165
3	A3	96	84.5685	0.834674	0.0996728
3	A3	97	84.8256	0.823693	0.102691
3	A3	98	85.0826	0.815889	0.107425
3	A3	99	85.3397	0.80557	0.114139
3	A3	100	85.5968	0.792976	0.122866
3	A3	101	85.8538	0.784011	0.133673
3	A3	102	86.1109	0.768896	0.147355
3	A3	103	86.3679	0.747626	0.166345
3	A3	104	86.625	0.724002	0.19524
3	A3	105	86.882	0.711351	0.240081
3	A3	106	87.1391	0.699621	0.305965
3	A3	107	87.3961	0.680826	0.393541
3	A3	108	87.6532	0.639826	0.496116
3	A3	109	87.9103	0.535926	0.599255
3	A3	110	88.1673	0.396044	0.683767
3	A3	111	88.4244	0.318266	0.731172
3	A3	112	88.6814	0.228043	0.729475
3	A3	113	88.9385	0.0935953	0.677006
3	A3	114	89.1955	0.0498292	0.582948
3	A3	115	89.4526	0.0468682	0.464463
3	A3	116	89.7096	0.0478075	0.341494
3	A3	117	89.9667	0.0464	0.231172
3	A3	118	90.2238	0.0459777	0.143943
3	A3	119	90.4808	0.046018	0.0826278
3	A3	120	90.7379	0.0450876	0.0441584
3	A3	121	90.9949	0.0454347	0.0225862
3	A3	122	91.252	0.0445578	0.0117718
3	A3	123	91.509	0.0439237	0.00691257
3	A3	124	91.7661	0.0441451	0.00491221
3	A3	125	92.0232	0.0430561	0.00407711
3	A3	126	92.2802	0.0427753	0.00362379
3	A3	127	92.5373	0.0423913	0.00326672
3	A3	128	92.7943	0.0424697	0.00295152
3	A3	129	93.0514	0.0424799	0.00270229
3	A3	130	93.3084	0.0421609	0.00254058
3	A3	131	93.5655	0.0416474	0.00245071
3	A3	132	93.8225	0.0414505	0.00237903
3	A3	133	94.0796	0.0414595	0.00225584
3	A3	134	94.3367	0.0409219	0.00202598
3	A3	135	94.5937	0.0402232	0.00167462
3	A3	136	94.8508	0.0403005	0.0012365
4	A4	1	60.1482	1.89432	0.11169
4	A4	2	60.4053	1.8877	0.112257
4	A4	3	60.6623	1.87746	0.112929
4	A4	4	60.9194	1.86936	0.113561
4	A4	5	61.1764	1.85217	0.114095
4	A4	6	61.4335	1.84273	0.114582
4	A4	7	61.6905	1.83121	0.115121
4	A4	8	61.9476	1.82095	0.115727
4	A4	9	62.2046	1.81255	0.116257
4	A4	10	62.4617	1.79721	0.116454
4	A4	11	62.7188	1.78328	0.116107
4	A4	12	62.9758	1.77218	0.115213
4	A4	13	63.2329	1.76225	0.11402
4	A4	14	63.4899	1.74814	0.112933
4	A4	15	63.747	1.73889	0.112313
4	A4	16	64.004	1.72924	0.11231
4	A4	17	64.2611	1.72073	0.112798
4	A4	18	64.5182	1.7057	0.113456
4	A4	19	64.7752	1.69128	0.113932
4	A4	20	65.0323	1.6865	0.114017
4	A4	21	65.2893	1.66882	0.113733
4	A4	22	65.5464	1.65891	0.113324
4	A4	23	65.8034	1.64828	0.113146
4	A4	24	66.0605	1.63641	0.113492
4	A4	25	66.3175	1.62688	0.114418
4	A4	26	66.5746	1.61772	0.115682
4	A4	27	66.8317	1.6059	0.116826
4	A4	28	67.0887	1.58693	0.117385
4	A4	29	67.3458	1.5788	0.117112
4	A4	30	67.6028	1.56656	0.116087
4	A4	31	67.8599	1.5517	0.114672
4	A4	32	68.1169	1.54409	0.113343
4	A4	33	68.374	1.53276	0.112482
4	A4	34	68.6311	1.52053	0.112237
4	A4	35	68.8881	1.51272	0.112479
4	A4	36	69.1452	1.49979	0.112899
4	A4	37	69.4022	1.48706	0.113169
4	A4	38	69.6593	1.47617	0.113101
4	A4	39	69.9163	1.45989	0.112712
4	A4	40	70.1734	1.45577	0.112156
4	A4	41	70.4304	1.44139	0.111598
4	A4	42	70.6875	1.43064	0.111101
4	A4	43	70.9446	1.42084	0.110613
4	A4	44	71.2016	1.40702	0.110046
4	A4	45	71.4587	1.39742	0.109373
4	A4	46	71.7157	1.384	0.108681
4	A4	47	71.9728	1.37672	0.108134
4	A4	48	72.2298	1.36318	0.107874
4	A4	49	72.4869	1.35308	0.107929
4	A4	50	72.7439	1.34741	0.108177
4	A4	51	73.001	1.32977	0.108401
4	A4	52	73.2581	1.32016	0.108394
4	A4	53	73.5151	1.30965	0.108072
4	A4	54	73.7722	1.29927	0.107508
4	A4	55	74.0292	1.28656	0.106893
4	A4	56	74.2863	1.27617	0.106433
4	A4	57	74.5433	1.26966	0.106239
4	A4	58	74.8004	1.25426	0.106249
4	A4	59	75.0574	1.2476	0.106257
4	A4	60	75.3145	1.23537	0.106018
4	A4	61	75.5716	1.2226	0.105409
4	A4	62	75.8286	1.21036	0.104536
4	A4	63	76.0857	1.20148	0.103702
4	A4	64	76.3427	1.19401	0.103237
4	A4	65	76.5998	1.18188	0.103282
4	A4	66	76.8568	1.17438	0.103678
4	A4	67	77.1139	1.16386	0.104042
4	A4	68	77.371	1.14902	0.103988
4	A4	69	77.628	1.13676	0.103343
4	A4	70	77.8851	1.12798	0.102218
4	A4	71	78.1421	1.12015	0.100884
4	A4	72	78.3992	1.11096	0.0995911
4	A4	73	78.6562	1.10004	0.0984618
4	A4	74	78.9133	1.0884	0.0975347
4	A4	75	79.1703	1.07808	0.0968773
4	A4	76	79.4274	1.06889	0.096626
4	A4	77	79.6845	1.06262	0.0969135
4	A4	78	79.9415	1.05385	0.0977423
4	A4	79	80.1986	1.04117	0.0989196
4	A4	80	80.4556	1.02955	0.100117
4	A4	81	80.7127	1.02143	0.101009
4	A4	82	80.9697	1.01198	0.101409
4	A4	83	81.2268	0.9976	0.101327
4	A4	84	81.4839	0.987774	0.100947
4	A4	85	81.7409	0.980371	0.100526
4	A4	86	81.998	0.971464	0.100266
4	A4	87	82.255	0.958641	0.100219
4	A4	88	82.5121	0.951008	0.10027
4	A4	89	82.7691	0.939226	0.100215
4	A4	90	83.0262	0.929611	0.099882
4	A4	91	83.2832	0.917519	0.0992258
4	A4	92	83.5403	0.9066	0.0983653
4	A4	93	83.7974	0.902488	0.0975551
4	A4	94	84.0544	0.889336	0.0971439
4	A4	95	84.3115	0.878976	0.0975549
4	A4	96	84.5685	0.869778	0.0992778
4	A4	97	84.8256	0.862536	0.102817
4	A4	98	85.0826	0.853721	0.108563
4	A4	99	85.3397	0.840014	0.11664
4	A4	100	85.5968	0.831363	0.126854
4	A4	101	85.8538	0.819736	0.138976
4	A4	102	86.1109	0.80331	0.153459
4	A4	103	86.3679	0.78235	0.172413
4	A4	104	86.625	0.754685	0.200232
4	A4	105	86.882	0.741799	0.24302
4	A4	106	87.1391	0.731652	0.306348
4	A4	107	87.3961	0.712119	0.391862
4	A4	108	87.6532	0.669613	0.494265
4	A4	109	87.9103	0.570466	0.600472
4	A4	110	88.1673	0.442205	0.691844
4	A4	111	88.4244	0.367918	0.749007
4	A4	112	88.6814	0.258255	0.757608
4	A4	113	88.9385	0.104779	0.712987
4	A4	114	89.1955	0.0575053	0.622046
4	A4	115	89.4526	0.0561333	0.50138
4	A4	116	89.7096	0.0548443	0.372164
4	A4	117	89.9667	0.0549003	0.253755
4	A4	118	90.2238	0.0537476	0.15873
4	A4	119	90.4808	0.0536761	0.0912182
4	A4	120	90.7379	0.0532091	0.0485146
4	A4	121	90.9949	0.0534831	0.024386
4	A4	122	91.252	0.0527624	0.0121732
4	A4	123	91.509	0.0517997	0.00661022
4	A4	124	91.7661	0.0518289	0.00431139
4	A4	125	92.0232	0.0519014	0.00344913
4	A4	126	92.2802	0.0515791	0.00317925
4	A4	127	92.5373	0.0516773	0.0031464
4	A4	128	92.7943	0.0507561	0.00318225
4	A4	129	93.0514	0.0501741	0.0031771
4	A4	130	93.3084	0.0499212	0.00305709
4	A4	131	93.5655	0.0494858	0.00279617
4	A4	132	93.8225	0.0498326	0.00241797
4	A4	133	94.0796	0.0489421	0.00197618
4	A4	134	94.3367	0.0496918	0.00152698
4	A4	135	94.5937	0.0491655	0.00111072
4	A4	136	94.8508	0.0486896	0.00074968
5	A5	1	60.1482	1.98881	0.115765
5	A5	2	60.4053	1.9767	0.116473
5	A5	3	60.6623	1.96643	0.117009
5	A5	4	60.9194	1.9531	0.117294
5	A5	5	61.1764	1.94477	0.117387
5	A5	6	61.4335	1.93317	0.117426
5	A5	7	61.6905	1.92081	0.117522
5	A5	8	61.9476	1.90799	0.117693
5	A5	9	62.2046	1.90133	0.117863
5	A5	10	62.4617	1.88647	0.117918
5	A5	11	62.7188	1.87127	0.117766
5	A5	12	62.9758	1.86477	0.117385
5	A5	13	63.2329	1.85346	0.116826
5	A5	14	63.4899	1.83747	0.116209
5	A5	15	63.747	1.82897	0.115692
5	A5	16	64.004	1.81632	0.11541
5	A5	17	64.2611	1.80694	0.115418
5	A5	18	64.5182	1.798	0.115663
5	A5	19	64.7752	1.78173	0.116017
5	A5	20	65.0323	1.77363	0.116362
5	A5	21	65.2893	1.75878	0.116653
5	A5	22	65.5464	1.74941	0.116923
5	A5	23	65.8034	1.73923	0.117215
5	A5	24	66.0605	1.72605	0.117515
5	A5	25	66.3175	1.71548	0.117757
5	A5	26	66.5746	1.70315	0.117876
5	A5	27	66.8317	1.6907	0.11787
5	A5	28	67.0887	1.67886	0.117822
5	A5	29	67.3458	1.66777	0.117844
5	A5	30	67.6028	1.65685	0.117976
5	A5	31	67.8599	1.64706	0.118139
5	A5	32	68.1169	1.63324	0.11816
5	A5	33	68.374	1.62114	0.117869
5	A5	34	68.6311	1.60815	0.117192
5	A5	35	68.8881	1.59872	0.116193
5	A5	36	69.1452	1.58613	0.115035
5	A5	37	69.4022	1.57688	0.113889
5	A5	38	69.6593	1.56148	0.112864
5	A5	39	69.9163	1.55391	0.111972
5	A5	40	70.1734	1.54752	0.11117
5	A5	41	70.4304	1.52648	0.11044
5	A5	42	70.6875	1.5224	0.109857
5	A5	43	70.9446	1.50743	0.109569
5	A5	44	71.2016	1.49943	0.10968
5	A5	45	71.4587	1.49141	0.110139
5	A5	46	71.7157	1.48083	0.110721
5	A5	47	71.9728	1.46628	0.111166
5	A5	48	72.2298	1.44963	0.111345
5	A5	49	72.4869	1.44566	0.111319
5	A5	50	72.7439	1.43519	0.111241
5	A5	51	73.001	1.42295	0.111205
5	A5	52	73.2581	1.41309	0.111172
5	A5	53	73.5151	1.39919	0.111033
5	A5	54	73.7722	1.38878	0.110719
5	A5	55	74.0292	1.37741	0.110259
5	A5	56	74.2863	1.36881	0.109721
5	A5	57	74.5433	1.35776	0.10914
5	A5	58	74.8004	1.34657	0.108477
5	A5	59	75.0574	1.33468	0.107671
5	A5	60	75.3145	1.32398	0.10673
5	A5	61	75.5716	1.31473	0.105762
5	A5	62	75.8286	1.30154	0.104946
5	A5	63	76.0857	1.29703	0.104435
5	A5	64	76.3427	1.28336	0.104287
5	A5	65	76.5998	1.27273	0.104446
5	A5	66	76.8568	1.26585	0.104784
5	A5	67	77.1139	1.24987	0.105156
5	A5	68	77.371	1.24408	0.105444
5	A5	69	77.628	1.2322	0.105572
5	A5	70	77.8851	1.22312	0.105529
5	A5	71	78.1421	1.20786	0.105369
5	A5	72	78.3992	1.19968	0.105172
5	A5	73	78.6562	1.19188	0.104974
5	A5	74	78.9133	1.18315	0.104693
5	A5	75	79.1703	1.16726	0.104153
5	A5	76	79.4274	1.15967	0.103195
5	A5	77	79.6845	1.14725	0.101819
5	A5	78	79.9415	1.13701	0.10023
5	A5	79	80.1986	1.12884	0.0987643
5	A5	80	80.4556	1.12197	0.0977264
5	A5	81	80.7127	1.11101	0.0972574
5	A5	82	80.9697	1.1003	0.0973077
5	A5	83	81.2268	1.09281	0.0977134
5	A5	84	81.4839	1.0802	0.0982958
5	A5	85	81.7409	1.07435	0.0989278
5	A5	86	81.998	1.06044	0.0995339
5	A5	87	82.255	1.05344	0.100066
5	A5	88	82.5121	1.04342	0.10048
5	A5	89	82.7691	1.03244	0.100739
5	A5	90	83.0262	1.02118	0.100848
5	A5	91	83.2832	1.0129	0.100864
5	A5	92	83.5403	1.00259	0.100897
5	A5	93	83.7974	0.993208	0.101095
5	A5	94	84.0544	0.983082	0.101653
5	A5	95	84.3115	0.972815	0.102849
5	A5	96	84.5685	0.962132	0.105084
5	A5	97	84.8256	0.953822	0.108846
5	A5	98	85.0826	0.942951	0.11458
5	A5	99	85.3397	0.932688	0.122478
5	A5	100	85.5968	0.921784	0.13236
5	A5	101	85.8538	0.910046	0.143862
5	A5	102	86.1109	0.894632	0.157101
5	A5	103	86.3679	0.869394	0.173668
5	A5	104	86.625	0.846784	0.19742
5	A5	105	86.882	0.831806	0.234265
5	A5	106	87.1391	0.82007	0.290469
5	A5	107	87.3961	0.802594	0.369689
5	A5	108	87.6532	0.764537	0.469824
5	A5	109	87.9103	0.68192	0.581063
5	A5	110	88.1673	0.583977	0.686314
5	A5	111	88.4244	0.512884	0.764486
5	A5	112	88.6814	0.368008	0.796202
5	A5	113	88.9385	0.191279	0.770343
5	A5	114	89.1955	0.134479	0.688756
5	A5	115	89.4526	0.131704	0.566532
5	A5	116	89.7096	0.131775	0.427094
5	A5	117	89.9667	0.132041	0.294194
5	A5	118	90.2238	0.131404	0.184765
5	A5	119	90.4808	0.130907	0.105732
5	A5	120	90.7379	0.131568	0.0552972
5	A5	121	90.9949	0.131445	0.0267739
5	A5	122	91.252	0.131211	0.0124725
5	A5	123	91.509	0.130518	0.0061047
5	A5	124	91.7661	0.129585	0.0035413
5	A5	125	92.0232	0.129502	0.00253168
5	A5	126	92.2802	0.130357	0.00206283
5	A5	127	92.5373	0.130107	0.00176899
5	A5	128	92.7943	0.129558	0.00154082
5	A5	129	93.0514	0.129324	0.00133513
5	A5	130	93.3084	0.129232	0.00112271
5	A5	131	93.5655	0.128777	0.000897296
5	A5	132	93.8225	0.129642	0.000682131
5	A5	133	94.0796	0.129152	0.000511356
5	A5	134	94.3367	0.129884	0.000400224
5	A5	135	94.5937	0.128992	0.000331642
5	A5	136	94.8508	0.128323	0.000271042
6	A6	1	60.1482	1.8716	0.108804
6	A6	2	60.4053	1.8703	0.108744
6	A6	3	60.6623	1.85405	0.108598
6	A6	4	60.9194	1.84663	0.10843
6	A6	5	61.1764	1.83021	0.108387
6	A6	6	61.4335	1.82531	0.108611
6	A6	7	61.6905	1.81149	0.109133
6	A6	8	61.9476	1.80145	0.109832
6	A6	9	62.2046	1.79038	0.110492
6	A6	10	62.4617	1.77517	0.11095
6	A6	11	62.7188	1.76427	0.111196
6	A6	12	62.9758	1.75145	0.111372
6	A6	13	63.2329	1.74326	0.111648
6	A6	14	63.4899	1.72995	0.112076
6	A6	15	63.747	1.71904	0.112537
6	A6	16	64.004	1.70816	0.112815
6	A6	17	64.2611	1.69307	0.112745
6	A6	18	64.5182	1.67975	0.112332
6	A6	19	64.7752	1.66841	0.111736
6	A6	20	65.0323	1.66068	0.111152
6	A6	21	65.2893	1.64831	0.110664
6	A6	22	65.5464	1.6339	0.1102
6	A6	23	65.8034	1.62512	0.109594
6	A6	24	66.0605	1.61247	0.108723
6	A6	25	66.3175	1.59845	0.107617
6	A6	26	66.5746	1.5871	0.106463
6	A6	27	66.8317	1.58048	0.105516
6	A6	28	67.0887	1.56517	0.104973
6	A6	29	67.3458	1.55774	0.104876
6	A6	30	67.6028	1.54589	0.10513
6	A6	31	67.8599	1.53592	0.105589
6	A6	32	68.1169	1.52039	0.106154
6	A6	33	68.374	1.51175	0.106809
6	A6	34	68.6311	1.49954	0.107561
6	A6	35	68.8881	1.49138	0.108366
6	A6	36	69.1452	1.4826	0.109101
6	A6	37	69.4022	1.46107	0.109631
6	A6	38	69.6593	1.45157	0.109865
6	A6	39	69.9163	1.44466	0.109772
6	A6	40	70.1734	1.43459	0.109336
6	A6	41	70.4304	1.41581	0.108541
6	A6	42	70.6875	1.40888	0.107405
6	A6	43	70.9446	1.39322	0.106044
6	A6	44	71.2016	1.38533	0.104681
6	A6	45	71.4587	1.37519	0.103572
6	A6	46	71.7157	1.36355	0.102916
6	A6	47	71.9728	1.35197	0.102776
6	A6	48	72.2298	1.34269	0.103071
6	A6	49	72.4869	1.33369	0.103627
6	A6	50	72.7439	1.31922	0.104247
6	A6	51	73.001	1.30804	0.104772
6	A6	52	73.2581	1.29834	0.105107
6	A6	53	73.5151	1.28639	0.1052
6	A6	54	73.7722	1.2765	0.105014
6	A6	55	74.0292	1.26498	0.104518
6	A6	56	74.2863	1.24963	0.103705
6	A6	57	74.5433	1.24329	0.102611
6	A6	58	74.8004	1.23213	0.101338
6	A6	59	75.0574	1.21892	0.100036
6	A6	60	75.3145	1.21091	0.0988901
6	A6	61	75.5716	1.19772	0.0980719
6	A6	62	75.8286	1.19144	0.0976916
6	A6	63	76.0857	1.17988	0.0977476
6	A6	64	76.3427	1.17187	0.0981332
6	A6	65	76.5998	1.15748	0.0986848
6	A6	66	76.8568	1.14669	0.0992462
6	A6	67	77.1139	1.13932	0.0996948
6	A6	68	77.371	1.1286	0.0999326
6	A6	69	77.628	1.116	0.0998795
6	A6	70	77.8851	1.10605	0.0994993
6	A6	71	78.1421	1.09404	0.0988439
6	A6	72	78.3992	1.0828	0.098051
6	A6	73	78.6562	1.07563	0.0972809
6	A6	74	78.9133	1.06619	0.0966303
6	A6	75	79.1703	1.05404	0.0960939
6	A6	76	79.4274	1.04482	0.0956144
6	A6	77	79.6845	1.03092	0.0951624
6	A6	78	79.9415	1.0238	0.0947831
6	A6	79	80.1986	1.01676	0.0945674
6	A6	80	80.4556	1.00512	0.0945852
6	A6	81	80.7127	0.989963	0.0948301
6	A6	82	80.9697	0.987675	0.095205
6	A6	83	81.2268	0.974441	0.0955465
6	A6	84	81.4839	0.964755	0.09568
6	A6	85	81.7409	0.951901	0.0954918
6	A6	86	81.998	0.943066	0.0949909
6	A6	87	82.255	0.932491	0.0943199
6	A6	88	82.5121	0.924892	0.0937085
6	A6	89	82.7691	0.913795	0.0933854
6	A6	90	83.0262	0.904008	0.0935041
6	A6	91	83.2832	0.895417	0.0941066
6	A6	92	83.5403	0.885024	0.095131
6	A6	93	83.7974	0.875438	0.0964575
6	A6	94	84.0544	0.864189	0.0979929
6	A6	95	84.3115	0.854066	0.0997755
6	A6	96	84.5685	0.842759	0.102069
6	A6	97	84.8256	0.831894	0.105366
6	A6	98	85.0826	0.82026	0.110251
6	A6	99	85.3397	0.812224	0.117113
6	A6	100	85.5968	0.801031	0.125926
6	A6	101	85.8538	0.790761	0.136337
6	A6	102	86.1109	0.77182	0.148297
6	A6	103	86.3679	0.74808	0.163111
6	A6	104	86.625	0.720815	0.184315
6	A6	105	86.882	0.710574	0.217567
6	A6	106	87.1391	0.699229	0.269057
6	A6	107	87.3961	0.678657	0.342641
6	A6	108	87.6532	0.646445	0.436771
6	A6	109	87.9103	0.566054	0.542544
6	A6	110	88.1673	0.46196	0.644002
6	A6	111	88.4244	0.390063	0.72113
6	A6	112	88.6814	0.251448	0.755189
6	A6	113	88.9385	0.067987	0.734924
6	A6	114	89.1955	0.000321955	0.661203
6	A6	115	89.4526	-0.00302016	0.54758
6	A6	116	89.7096	-0.00314831	0.415928
6	A6	117	89.9667	-0.00380093	0.288969
6	A6	118	90.2238	-0.00411911	0.183335
6	A6	119	90.4808	-0.00431663	0.106247
6	A6	120	90.7379	-0.00445781	0.056479
6	A6	121	90.9949	-0.00504566	0.027914
6	A6	122	91.252	-0.00547562	0.0132934
6	A6	123	91.509	-0.00550622	0.00660787
6	A6	124	91.7661	-0.00554106	0.00387691
6	A6	125	92.0232	-0.00609077	0.00288748
6	A6	126	92.2802	-0.00591885	0.00257668
6	A6	127	92.5373	-0.00676036	0.00248699
6	A6	128	92.7943	-0.00667704	0.0024295
6	A6	129	93.0514	-0.00699752	0.00232459
6	A6	130	93.3084	-0.00773475	0.00214318
6	A6	131	93.5655	-0.00742228	0.0018872
6	A6	132	93.8225	-0.00767679	0.00157846
6	A6	133	94.0796	-0.00753555	0.00124754
6	A6	134	94.3367	-0.00831013	0.000924708
6	A6	135	94.5937	-0.00756611	0.000635039
6	A6	136	94.8508	-0.0078852	0.000396499
7	A7	1	60.1482	1.61719	0.139424
7	A7	2	60.4053	1.60351	0.14032
7	A7	3	60.6623	1.5959	0.141249
7	A7	4	60.9194	1.58743	0.142023
7	A7	5	61.1764	1.5661	0.142592
7	A7	6	61.4335	1.55631	0.143035
7	A7	7	61.6905	1.54605	0.143455
7	A7	8	61.9476	1.53418	0.143821
7	A7	9	62.2046	1.52174	0.14393
7	A7	10	62.4617	1.50849	0.14352
7	A7	11	62.7188	1.49164	0.142483
7	A7	12	62.9758	1.47788	0.140983
7	A7	13	63.2329	1.47197	0.139403
7	A7	14	63.4899	1.4559	0.13813
7	A7	15	63.747	1.44629	0.137331
7	A7	16	64.004	1.43389	0.136871
7	A7	17	64.2611	1.42197	0.136402
7	A7	18	64.5182	1.41157	0.135583
7	A7	19	64.7752	1.39376	0.134291
7	A7	20	65.0323	1.38312	0.132721
7	A7	21	65.2893	1.37448	0.131308
7	A7	22	65.5464	1.36114	0.130513
7	A7	23	65.8034	1.35365	0.130613
7	A7	24	66.0605	1.34013	0.131584
7	A7	25	66.3175	1.32876	0.133119
7	A7	26	66.5746	1.31926	0.134779
7	A7	27	66.8317	1.30354	0.136154
7	A7	28	67.0887	1.29166	0.137005
7	A7	29	67.3458	1.27947	0.137307
7	A7	30	67.6028	1.26772	0.137201
7	A7	31	67.8599	1.25524	0.136877
7	A7	32	68.1169	1.24191	0.136468
7	A7	33	68.374	1.23406	0.135977
7	A7	34	68.6311	1.22018	0.135316
7	A7	35	68.8881	1.20585	0.134407
7	A7	36	69.1452	1.19487	0.133276
7	A7	37	69.4022	1.18247	0.132095
7	A7	38	69.6593	1.17364	0.131102
7	A7	39	69.9163	1.16101	0.13048
7	A7	40	70.1734	1.14661	0.13023
7	A7	41	70.4304	1.14191	0.130136
7	A7	42	70.6875	1.12871	0.12985
7	A7	43	70.9446	1.1125	0.129077
7	A7	44	71.2016	1.1015	0.127746
7	A7	45	71.4587	1.09063	0.126082
7	A7	46	71.7157	1.08103	0.124508
7	A7	47	71.9728	1.07031	0.123445
7	A7	48	72.2298	1.05987	0.123111
7	A7	49	72.4869	1.04814	0.123432
7	A7	50	72.7439	1.04065	0.124087
7	A7	51	73.001	1.02849	0.124667
7	A7	52	73.2581	1.01236	0.12487
7	A7	53	73.5151	1.00415	0.124628
7	A7	54	73.7722	0.992201	0.124083
7	A7	55	74.0292	0.982798	0.123468
7	A7	56	74.2863	0.972909	0.122935
7	A7	57	74.5433	0.959981	0.122469
7	A7	58	74.8004	0.950713	0.121913
7	A7	59	75.0574	0.938765	0.121064
7	A7	60	75.3145	0.926367	0.119791
7	A7	61	75.5716	0.919579	0.118109
7	A7	62	75.8286	0.905475	0.116199
7	A7	63	76.0857	0.894749	0.11438
7	A7	64	76.3427	0.888998	0.113035
7	A7	65	76.5998	0.8763	0.112496
7	A7	66	76.8568	0.869098	0.112913
7	A7	67	77.1139	0.859127	0.114176
7	A7	68	77.371	0.848824	0.115915
7	A7	69	77.628	0.83996	0.117594
7	A7	70	77.8851	0.825521	0.118689
7	A7	71	78.1421	0.81526	0.118857
7	A7	72	78.3992	0.804557	0.118042
7	A7	73	78.6562	0.793168	0.116466
7	A7	74	78.9133	0.784118	0.114524
7	A7	75	79.1703	0.774525	0.112642
7	A7	76	79.4274	0.764609	0.11115
7	A7	77	79.6845	0.755088	0.11021
7	A7	78	79.9415	0.746256	0.109809
7	A7	79	80.1986	0.737322	0.109801
7	A7	80	80.4556	0.725554	0.109981
7	A7	81	80.7127	0.716387	0.110155
7	A7	82	80.9697	0.706783	0.110188
7	A7	83	81.2268	0.696397	0.110007
7	A7	84	81.4839	0.689326	0.109591
7	A7	85	81.7409	0.674567	0.108963
7	A7	86	81.998	0.669392	0.108184
7	A7	87	82.255	0.657934	0.107362
7	A7	88	82.5121	0.648493	0.106621
7	A7	89	82.7691	0.639508	0.106056
7	A7	90	83.0262	0.632276	0.105684
7	A7	91	83.2832	0.620996	0.105426
7	A7	92	83.5403	0.611159	0.105139
7	A7	93	83.7974	0.603278	0.104678
7	A7	94	84.0544	0.592966	0.103957
7	A7	95	84.3115	0.583288	0.102983
7	A7	96	84.5685	0.574812	0.101851
7	A7	97	84.8256	0.565534	0.100702
7	A7	98	85.0826	0.558471	0.0996903
7	A7	99	85.3397	0.54811	0.0990075
7	A7	100	85.5968	0.539038	0.099043
7	A7	101	85.8538	0.533026	0.100741
7	A7	102	86.1109	0.52219	0.106158
7	A7	103	86.3679	0.512772	0.119046
7	A7	104	86.625	0.506313	0.144988
7	A7	105	86.882	0.496467	0.190417
7	A7	106	87.1391	0.487432	0.260005
7	A7	107	87.3961	0.473491	0.352794
7	A7	108	87.6532	0.44636	0.458794
7	A7	109	87.9103	0.381998	0.558685
7	A7	110	88.1673	0.242639	0.628452
7	A7	111	88.4244	0.0925624	0.64802
7	A7	112	88.6814	0.0384592	0.60982
7	A7	113	88.9385	0.0327874	0.522397
7	A7	114	89.1955	0.0324811	0.406768
7	A7	115	89.4526	0.0322048	0.287699
7	A7	116	89.7096	0.0314446	0.184855
7	A7	117	89.9667	0.0317259	0.108077
7	A7	118	90.2238	0.0315254	0.0577967
7	A7	119	90.4808	0.0315302	0.0286843
7	A7	120	90.7379	0.0306162	0.0137169
7	A7	121	90.9949	0.030591	0.00686304
7	A7	122	91.252	0.0302987	0.00405275
7	A7	123	91.509	0.0306479	0.00300841
7	A7	124	91.7661	0.0298367	0.00265467
7	A7	125	92.0232	0.0293249	0.0025629
7	A7	126	92.2802	0.0302939	0.00258626
7	A7	127	92.5373	0.0293316	0.00267038
7	A7	128	92.7943	0.028967	0.00277587
7	A7	129	93.0514	0.0289886	0.00285822
7	A7	130	93.3084	0.0281836	0.00287212
7	A7	131	93.5655	0.0285564	0.00278125
7	A7	132	93.8225	0.0279461	0.00256633
7	A7	133	94.0796	0.0275629	0.00223062
7	A7	134	94.3367	0.0273864	0.00180326
7	A7	135	94.5937	0.027613	0.00133663
7	A7	136	94.8508	0.0276498	0.000893632
8	A8	1	60.1482	1.71288	0.133971
8	A8	2	60.4053	1.70115	0.135806
8	A8	3	60.6623	1.68567	0.137087
8	A8	4	60.9194	1.67265	0.137476
8	A8	5	61.1764	1.66014	0.137031
8	A8	6	61.4335	1.65197	0.136108
8	A8	7	61.6905	1.63761	0.135112
8	A8	8	61.9476	1.62701	0.134276
8	A8	9	62.2046	1.61804	0.133613
8	A8	10	62.4617	1.60119	0.133031
8	A8	11	62.7188	1.59187	0.132481
8	A8	12	62.9758	1.57721	0.132025
8	A8	13	63.2329	1.56987	0.131778
8	A8	14	63.4899	1.55669	0.131804
8	A8	15	63.747	1.54784	0.132072
8	A8	16	64.004	1.53138	0.132498
8	A8	17	64.2611	1.52214	0.133022
8	A8	18	64.5182	1.50828	0.133627
8	A8	19	64.7752	1.49946	0.134292
8	A8	20	65.0323	1.48809	0.13493
8	A8	21	65.2893	1.47402	0.135387
8	A8	22	65.5464	1.46334	0.135509
8	A8	23	65.8034	1.44561	0.135203
8	A8	24	66.0605	1.44112	0.134458
8	A8	25	66.3175	1.42511	0.133307
8	A8	26	66.5746	1.41537	0.131815
8	A8	27	66.8317	1.40065	0.130112
8	A8	28	67.0887	1.3903	0.128441
8	A8	29	67.3458	1.37873	0.12713
8	A8	30	67.6028	1.36738	0.126486
8	A8	31	67.8599	1.36027	0.126647
8	A8	32	68.1169	1.34762	0.127507
8	A8	33	68.374	1.33739	0.128774
8	A8	34	68.6311	1.32221	0.130105
8	A8	35	68.8881	1.31243	0.13122
8	A8	36	69.1452	1.29989	0.131938
8	A8	37	69.4022	1.28959	0.132143
8	A8	38	69.6593	1.2797	0.131769
8	A8	39	69.9163	1.2615	0.13082
8	A8	40	70.1734	1.25108	0.129406
8	A8	41	70.4304	1.24194	0.127722
8	A8	42	70.6875	1.23251	0.12599
8	A8	43	70.9446	1.21978	0.124431
8	A8	44	71.2016	1.20659	0.123262
8	A8	45	71.4587	1.19649	0.122706
8	A8	46	71.7157	1.18785	0.122916
8	A8	47	71.9728	1.17677	0.123844
8	A8	48	72.2298	1.16943	0.125175
8	A8	49	72.4869	1.1552	0.126404
8	A8	50	72.7439	1.14016	0.127069
8	A8	51	73.001	1.13025	0.126967
8	A8	52	73.2581	1.11899	0.126237
8	A8	53	73.5151	1.10692	0.125235
8	A8	54	73.7722	1.09883	0.124316
8	A8	55	74.0292	1.08738	0.123654
8	A8	56	74.2863	1.07567	0.123197
8	A8	57	74.5433	1.06404	0.122757
8	A8	58	74.8004	1.05549	0.122149
8	A8	59	75.0574	1.04065	0.121293
8	A8	60	75.3145	1.0314	0.120237
8	A8	61	75.5716	1.02117	0.119103
8	A8	62	75.8286	1.01327	0.118024
8	A8	63	76.0857	1.00043	0.117116
8	A8	64	76.3427	0.986407	0.116462
8	A8	65	76.5998	0.982452	0.116104
8	A8	66	76.8568	0.970691	0.115996
8	A8	67	77.1139	0.959718	0.115988
8	A8	68	77.371	0.949893	0.115873
8	A8	69	77.628	0.939757	0.115522
8	A8	70	77.8851	0.925942	0.114995
8	A8	71	78.1421	0.91582	0.114538
8	A8	72	78.3992	0.909732	0.114435
8	A8	73	78.6562	0.901876	0.114814
8	A8	74	78.9133	0.889134	0.115546
8	A8	75	79.1703	0.87716	0.116346
8	A8	76	79.4274	0.865735	0.116956
8	A8	77	79.6845	0.856811	0.117289
8	A8	78	79.9415	0.846013	0.117414
8	A8	79	80.1986	0.83653	0.117433
8	A8	80	80.4556	0.827319	0.11736
8	A8	81	80.7127	0.813543	0.11711
8	A8	82	80.9697	0.804942	0.116593
8	A8	83	81.2268	0.79333	0.115821
8	A8	84	81.4839	0.782228	0.114938
8	A8	85	81.7409	0.774939	0.114152
8	A8	86	81.998	0.764002	0.113613
8	A8	87	82.255	0.75606	0.113331
8	A8	88	82.5121	0.743289	0.113182
8	A8	89	82.7691	0.732514	0.112997
8	A8	90	83.0262	0.725528	0.112656
8	A8	91	83.2832	0.712993	0.112154
8	A8	92	83.5403	0.702541	0.111588
8	A8	93	83.7974	0.694724	0.111126
8	A8	94	84.0544	0.685472	0.110967
8	A8	95	84.3115	0.673445	0.111348
8	A8	96	84.5685	0.665663	0.112581
8	A8	97	84.8256	0.655464	0.115087
8	A8	98	85.0826	0.644201	0.119338
8	A8	99	85.3397	0.635733	0.125666
8	A8	100	85.5968	0.625487	0.134003
8	A8	101	85.8538	0.616021	0.143759
8	A8	102	86.1109	0.602589	0.154128
8	A8	103	86.3679	0.584044	0.164926
8	A8	104	86.625	0.559367	0.177714
8	A8	105	86.882	0.539199	0.196534
8	A8	106	87.1391	0.530708	0.227506
8	A8	107	87.3961	0.519797	0.276896
8	A8	108	87.6532	0.50365	0.347984
8	A8	109	87.9103	0.469204	0.437774
8	A8	110	88.1673	0.404276	0.535072
8	A8	111	88.4244	0.35264	0.621426
8	A8	112	88.6814	0.245566	0.675677
8	A8	113	88.9385	0.0811362	0.681116
8	A8	114	89.1955	0.0138887	0.632346
8	A8	115	89.4526	0.00952038	0.538148
8	A8	116	89.7096	0.00949389	0.418411
8	A8	117	89.9667	0.00915941	0.296544
8	A8	118	90.2238	0.00943725	0.191399
8	A8	119	90.4808	0.00859306	0.112629
8	A8	120	90.7379	0.00852429	0.0607706
8	A8	121	90.9949	0.0082174	0.0305732
8	A8	122	91.252	0.00768231	0.0149608
8	A8	123	91.509	0.00761668	0.00776541
8	A8	124	91.7661	0.0071725	0.00477481
8	A8	125	92.0232	0.00676792	0.0036038
8	A8	126	92.2802	0.00669905	0.00311085
8	A8	127	92.5373	0.00660836	0.00283694
8	A8	128	92.7943	0.00597593	0.00263653
8	A8	129	93.0514	0.00596746	0.00248492
8	A8	130	93.3084	0.00586417	0.00238965
8	A8	131	93.5655	0.00599645	0.0023484
8	A8	132	93.8225	0.00532173	0.0023289
8	A8	133	94.0796	0.00546935	0.00226979
8	A8	134	94.3367	0.00481866	0.00210459
8	A8	135	94.5937	0.00425477	0.00179791
8	A8	136	94.8508	0.00417572	0.00137103
9	A9	1	60.1482	1.62714	0.127844
9	A9	2	60.4053	1.6175	0.127599
9	A9	3	60.6623	1.60467	0.127067
9	A9	4	60.9194	1.59026	0.126478
9	A9	5	61.1764	1.58562	0.126184
9	A9	6	61.4335	1.56901	0.126457
9	A9	7	61.6905	1.56367	0.127312
9	A9	8	61.9476	1.54821	0.128501
9	A9	9	62.2046	1.53474	0.129651
9	A9	10	62.4617	1.52289	0.130468
9	A9	11	62.7188	1.50801	0.130846
9	A9	12	62.9758	1.49976	0.130843
9	A9	13	63.2329	1.48357	0.130578
9	A9	14	63.4899	1.47454	0.13014
9	A9	15	63.747	1.46116	0.129561
9	A9	16	64.004	1.44627	0.128856
9	A9	17	64.2611	1.43499	0.128064
9	A9	18	64.5182	1.42775	0.127272
9	A9	19	64.7752	1.40938	0.126594
9	A9	20	65.0323	1.39854	0.126126
9	A9	21	65.2893	1.39061	0.125902
9	A9	22	65.5464	1.37693	0.125868
9	A9	23	65.8034	1.36575	0.125906
9	A9	24	66.0605	1.3511	0.12588
9	A9	25	66.3175	1.34016	0.125692
9	A9	26	66.5746	1.32993	0.125307
9	A9	27	66.8317	1.31631	0.124744
9	A9	28	67.0887	1.30498	0.124054
9	A9	29	67.3458	1.29081	0.123304
9	A9	30	67.6028	1.28295	0.122559
9	A9	31	67.8599	1.26978	0.121871
9	A9	32	68.1169	1.25858	0.121275
9	A9	33	68.374	1.24549	0.1208
9	A9	34	68.6311	1.23532	0.120464
9	A9	35	68.8881	1.22657	0.120276
9	A9	36	69.1452	1.21093	0.12022
9	A9	37	69.4022	1.20125	0.120246
9	A9	38	69.6593	1.19018	0.120276
9	A9	39	69.9163	1.18055	0.120231
9	A9	40	70.1734	1.16514	0.120081
9	A9	41	70.4304	1.15533	0.119875
9	A9	42	70.6875	1.14432	0.119733
9	A9	43	70.9446	1.13144	0.119768
9	A9	44	71.2016	1.12367	0.119979
9	A9	45	71.4587	1.11022	0.120205
9	A9	46	71.7157	1.10117	0.120177
9	A9	47	71.9728	1.08473	0.119655
9	A9	48	72.2298	1.0735	0.11857
9	A9	49	72.4869	1.06395	0.117075
9	A9	50	72.7439	1.0529	0.11547
9	A9	51	73.001	1.0418	0.114076
9	A9	52	73.2581	1.0314	0.113102
9	A9	53	73.5151	1.02205	0.112597
9	A9	54	73.7722	1.01066	0.112463
9	A9	55	74.0292	1.00016	0.112536
9	A9	56	74.2863	0.989543	0.112665
9	A9	57	74.5433	0.976443	0.112763
9	A9	58	74.8004	0.967656	0.112806
9	A9	59	75.0574	0.958332	0.112797
9	A9	60	75.3145	0.946312	0.112734
9	A9	61	75.5716	0.934623	0.112606
9	A9	62	75.8286	0.923611	0.11241
9	A9	63	76.0857	0.914366	0.112132
9	A9	64	76.3427	0.902706	0.111723
9	A9	65	76.5998	0.895615	0.111094
9	A9	66	76.8568	0.880092	0.110168
9	A9	67	77.1139	0.869993	0.108968
9	A9	68	77.371	0.860373	0.10766
9	A9	69	77.628	0.850868	0.106522
9	A9	70	77.8851	0.841746	0.105825
9	A9	71	78.1421	0.833036	0.10572
9	A9	72	78.3992	0.820448	0.106182
9	A9	73	78.6562	0.811443	0.107022
9	A9	74	78.9133	0.803066	0.107946
9	A9	75	79.1703	0.791239	0.108641
9	A9	76	79.4274	0.778946	0.108863
9	A9	77	79.6845	0.769325	0.108519
9	A9	78	79.9415	0.758041	0.107699
9	A9	79	80.1986	0.74817	0.106626
9	A9	80	80.4556	0.739537	0.105558
9	A9	81	80.7127	0.72861	0.104681
9	A9	82	80.9697	0.720686	0.104053
9	A9	83	81.2268	0.709712	0.103625
9	A9	84	81.4839	0.698311	0.103304
9	A9	85	81.7409	0.689726	0.103019
9	A9	86	81.998	0.681772	0.102738
9	A9	87	82.255	0.669316	0.102451
9	A9	88	82.5121	0.66113	0.102153
9	A9	89	82.7691	0.651338	0.101828
9	A9	90	83.0262	0.64095	0.101465
9	A9	91	83.2832	0.63215	0.101067
9	A9	92	83.5403	0.621441	0.100652
9	A9	93	83.7974	0.612922	0.100233
9	A9	94	84.0544	0.603776	0.0997883
9	A9	95	84.3115	0.593769	0.0992585
9	A9	96	84.5685	0.583829	0.0985681
9	A9	97	84.8256	0.575266	0.0976848
9	A9	98	85.0826	0.565167	0.096711
9	A9	99	85.3397	0.555101	0.0959906
9	A9	100	85.5968	0.546874	0.0962645
9	A9	101	85.8538	0.539796	0.0989287
9	A9	102	86.1109	0.531199	0.106425
9	A9	103	86.3679	0.520693	0.122641
9	A9	104	86.625	0.512908	0.152902
9	A9	105	86.882	0.50256	0.202953
9	A9	106	87.1391	0.489024	0.276488
9	A9	107	87.3961	0.469402	0.371622
9	A9	108	87.6532	0.432518	0.477927
9	A9	109	87.9103	0.35839	0.576419
9	A9	110	88.1673	0.216861	0.644052
9	A9	111	88.4244	0.0651513	0.661806
9	A9	112	88.6814	-0.0047123	0.622657
9	A9	113	88.9385	-0.0151396	0.53493
9	A9	114	89.1955	-0.0172061	0.41896
9	A9	115	89.4526	-0.017063	0.298918
9	A9	116	89.7096	-0.0177085	0.194338
9	A9	117	89.9667	-0.0170705	0.11538
9	A9	118	90.2238	-0.0185256	0.0629662
9	A9	119	90.4808	-0.0184515	0.0321329
9	A9	120	90.7379	-0.0187183	0.0159873
9	A9	121	90.9949	-0.0193111	0.00843231
9	A9	122	91.252	-0.0194701	0.00524187
9	A9	123	91.509	-0.0194958	0.00397824
9	A9	124	91.7661	-0.0210058	0.00345008
9	A9	125	92.0232	-0.0202623	0.0031731
9	A9	126	92.2802	-0.0205222	0.00300031
9	A9	127	92.5373	-0.0209335	0.00291273
9	A9	128	92.7943	-0.0213668	0.00291324
9	A9	129	93.0514	-0.0210598	0.00297887
9	A9	130	93.3084	-0.0216535	0.00304979
9	A9	131	93.5655	-0.0223427	0.00304455
9	A9	132	93.8225	-0.0225269	0.00289141
9	A9	133	94.0796	-0.023159	0.00256088
9	A9	134	94.3367	-0.0232021	0.00208223
9	A9	135	94.5937	-0.0229215	0.00153338
9	A9	136	94.8508	-0.0229487	0.0010087
10	A10	1	60.1482	1.66013	0.126669
10	A10	2	60.4053	1.64657	0.126752
10	A10	3	60.6623	1.63815	0.126532
10	A10	4	60.9194	1.62301	0.126136
10	A10	5	61.1764	1.61602	0.125834
10	A10	6	61.4335	1.60106	0.12587
10	A10	7	61.6905	1.59523	0.126289
10	A10	8	61.9476	1.58054	0.126905
10	A10	9	62.2046	1.56743	0.127427
10	A10	10	62.4617	1.5577	0.127667
10	A10	11	62.7188	1.54099	0.127662
10	A10	12	62.9758	1.52712	0.127628
10	A10	13	63.2329	1.52678	0.127776
10	A10	14	63.4899	1.50909	0.128144
10	A10	15	63.747	1.49454	0.128554
10	A10	16	64.004	1.48436	0.128713
10	A10	17	64.2611	1.4725	0.128378
10	A10	18	64.5182	1.46094	0.127497
10	A10	19	64.7752	1.44582	0.126262
10	A10	20	65.0323	1.43467	0.125046
10	A10	21	65.2893	1.42274	0.12423
10	A10	22	65.5464	1.41526	0.124006
10	A10	23	65.8034	1.40537	0.124267
10	A10	24	66.0605	1.39269	0.12468
10	A10	25	66.3175	1.37411	0.124894
10	A10	26	66.5746	1.3674	0.12473
10	A10	27	66.8317	1.35347	0.124249
10	A10	28	67.0887	1.34501	0.123678
10	A10	29	67.3458	1.3309	0.123275
10	A10	30	67.6028	1.32025	0.12324
10	A10	31	67.8599	1.3082	0.123663
10	A10	32	68.1169	1.29854	0.124509
10	A10	33	68.374	1.2874	0.125608
10	A10	34	68.6311	1.27283	0.126687
10	A10	35	68.8881	1.26582	0.127441
10	A10	36	69.1452	1.24685	0.127636
10	A10	37	69.4022	1.23602	0.12718
10	A10	38	69.6593	1.22724	0.126149
10	A10	39	69.9163	1.21505	0.12477
10	A10	40	70.1734	1.19816	0.123367
10	A10	41	70.4304	1.18996	0.122282
10	A10	42	70.6875	1.18188	0.121768
10	A10	43	70.9446	1.16848	0.121886
10	A10	44	71.2016	1.15824	0.122458
10	A10	45	71.4587	1.14636	0.123118
10	A10	46	71.7157	1.13156	0.123442
10	A10	47	71.9728	1.12614	0.123115
10	A10	48	72.2298	1.10701	0.122075
10	A10	49	72.4869	1.09645	0.12056
10	A10	50	72.7439	1.08564	0.119041
10	A10	51	73.001	1.07878	0.118032
10	A10	52	73.2581	1.06455	0.11786
10	A10	53	73.5151	1.05626	0.118507
10	A10	54	73.7722	1.0474	0.119622
10	A10	55	74.0292	1.03278	0.120676
10	A10	56	74.2863	1.0192	0.121203
10	A10	57	74.5433	1.00699	0.120963
10	A10	58	74.8004	1.00041	0.119977
10	A10	59	75.0574	0.982662	0.118453
10	A10	60	75.3145	0.978158	0.116684
10	A10	61	75.5716	0.963941	0.114984
10	A10	62	75.8286	0.951504	0.113666
10	A10	63	76.0857	0.943548	0.112984
10	A10	64	76.3427	0.934016	0.11305
10	A10	65	76.5998	0.926107	0.113735
10	A10	66	76.8568	0.912719	0.114683
10	A10	67	77.1139	0.901104	0.115432
10	A10	68	77.371	0.888778	0.115604
10	A10	69	77.628	0.878966	0.115058
10	A10	70	77.8851	0.868078	0.113919
10	A10	71	78.1421	0.855949	0.112514
10	A10	72	78.3992	0.847713	0.111236
10	A10	73	78.6562	0.835303	0.110398
10	A10	74	78.9133	0.828977	0.110134
10	A10	75	79.1703	0.817985	0.110372
10	A10	76	79.4274	0.807635	0.110894
10	A10	77	79.6845	0.792541	0.111447
10	A10	78	79.9415	0.785859	0.111848
10	A10	79	80.1986	0.776719	0.112025
10	A10	80	80.4556	0.763319	0.11202
10	A10	81	80.7127	0.751302	0.111944
10	A10	82	80.9697	0.744539	0.111945
10	A10	83	81.2268	0.732919	0.112139
10	A10	84	81.4839	0.72175	0.112558
10	A10	85	81.7409	0.713209	0.113113
10	A10	86	81.998	0.702065	0.11361
10	A10	87	82.255	0.689775	0.113839
10	A10	88	82.5121	0.678034	0.113662
10	A10	89	82.7691	0.668916	0.113078
10	A10	90	83.0262	0.658196	0.11222
10	A10	91	83.2832	0.648036	0.111305
10	A10	92	83.5403	0.634871	0.110573
10	A10	93	83.7974	0.629658	0.110243
10	A10	94	84.0544	0.617116	0.11052
10	A10	95	84.3115	0.606817	0.111647
10	A10	96	84.5685	0.597343	0.113983
10	A10	97	84.8256	0.58557	0.118029
10	A10	98	85.0826	0.574954	0.124329
10	A10	99	85.3397	0.566486	0.133197
10	A10	100	85.5968	0.55426	0.144433
10	A10	101	85.8538	0.542514	0.157289
10	A10	102	86.1109	0.52672	0.170983
10	A10	103	86.3679	0.504514	0.185754
10	A10	104	86.625	0.471944	0.204002
10	A10	105	86.882	0.453484	0.230653
10	A10	106	87.1391	0.446548	0.272044
10	A10	107	87.3961	0.42808	0.333309
10	A10	108	87.6532	0.402812	0.415129
10	A10	109	87.9103	0.348796	0.511247
10	A10	110	88.1673	0.25734	0.608024
10	A10	111	88.4244	0.189579	0.686713
10	A10	112	88.6814	0.0923374	0.728278
10	A10	113	88.9385	-0.0698869	0.719538
10	A10	114	89.1955	-0.152572	0.658324
10	A10	115	89.4526	-0.159051	0.555092
10	A10	116	89.7096	-0.160379	0.429679
10	A10	117	89.9667	-0.159465	0.304444
10	A10	118	90.2238	-0.160576	0.197117
10	A10	119	90.4808	-0.160543	0.116671
10	A10	120	90.7379	-0.160741	0.0634224
10	A10	121	90.9949	-0.161242	0.0321073
10	A10	122	91.252	-0.161683	0.015646
10	A10	123	91.509	-0.162015	0.00781272
10	A10	124	91.7661	-0.162841	0.00432372
10	A10	125	92.0232	-0.162221	0.0027605
10	A10	126	92.2802	-0.162582	0.00199755
10	A10	127	92.5373	-0.162224	0.00161048
10	A10	128	92.7943	-0.162837	0.00146259
10	A10	129	93.0514	-0.162129	0.00148584
10	A10	130	93.3084	-0.163008	0.00160175
10	A10	131	93.5655	-0.163245	0.00171916
10	A10	132	93.8225	-0.163497	0.00175987
10	A10	133	94.0796	-0.1635	0.00168103
10	A10	134	94.3367	-0.163655	0.00148142
10	A10	135	94.5937	-0.163899	0.00119302
10	A10	136	94.8508	-0.16417	0.000865805
11	A11	1	60.1482	1.70627	0.121946
11	A11	2	60.4053	1.69177	0.123006
11	A11	3	60.6623	1.68154	0.123863
11	A11	4	60.9194	1.67087	0.124365
11	A11	5	61.1764	1.65951	0.124538
11	A11	6	61.4335	1.64826	0.124519
11	A11	7	61.6905	1.63927	0.124458
11	A11	8	61.9476	1.62367	0.124414
11	A11	9	62.2046	1.61435	0.124327
11	A11	10	62.4617	1.6056	0.124048
11	A11	11	62.7188	1.59055	0.123426
11	A11	12	62.9758	1.58032	0.122425
11	A11	13	63.2329	1.56772	0.121205
11	A11	14	63.4899	1.5568	0.120104
11	A11	15	63.747	1.54545	0.11949
11	A11	16	64.004	1.53659	0.11956
11	A11	17	64.2611	1.52974	0.120209
11	A11	18	64.5182	1.51661	0.121096
11	A11	19	64.7752	1.50129	0.121852
11	A11	20	65.0323	1.49129	0.122298
11	A11	21	65.2893	1.47926	0.1225
11	A11	22	65.5464	1.46825	0.12265
11	A11	23	65.8034	1.46345	0.122864
11	A11	24	66.0605	1.44695	0.123082
11	A11	25	66.3175	1.43348	0.123117
11	A11	26	66.5746	1.42529	0.122782
11	A11	27	66.8317	1.41228	0.12201
11	A11	28	67.0887	1.40163	0.120891
11	A11	29	67.3458	1.3898	0.119649
11	A11	30	67.6028	1.37827	0.118571
11	A11	31	67.8599	1.36835	0.117903
11	A11	32	68.1169	1.35958	0.117745
11	A11	33	68.374	1.34768	0.117987
11	A11	34	68.6311	1.33853	0.11836
11	A11	35	68.8881	1.32726	0.118578
11	A11	36	69.1452	1.31233	0.118492
11	A11	37	69.4022	1.29963	0.118163
11	A11	38	69.6593	1.297	0.117783
11	A11	39	69.9163	1.28231	0.117537
11	A11	40	70.1734	1.2705	0.11748
11	A11	41	70.4304	1.26119	0.117523
11	A11	42	70.6875	1.2498	0.11751
11	A11	43	70.9446	1.24033	0.117329
11	A11	44	71.2016	1.22757	0.11699
11	A11	45	71.4587	1.21407	0.116624
11	A11	46	71.7157	1.20787	0.116392
11	A11	47	71.9728	1.19638	0.116347
11	A11	48	72.2298	1.18658	0.116365
11	A11	49	72.4869	1.17702	0.116201
11	A11	50	72.7439	1.15991	0.115665
11	A11	51	73.001	1.15334	0.11479
11	A11	52	73.2581	1.13931	0.11385
11	A11	53	73.5151	1.13232	0.113193
11	A11	54	73.7722	1.12409	0.113014
11	A11	55	74.0292	1.11376	0.11322
11	A11	56	74.2863	1.09931	0.11348
11	A11	57	74.5433	1.09315	0.113437
11	A11	58	74.8004	1.07579	0.112919
11	A11	59	75.0574	1.06972	0.112017
11	A11	60	75.3145	1.05791	0.111
11	A11	61	75.5716	1.04989	0.110138
11	A11	62	75.8286	1.04152	0.109574
11	A11	63	76.0857	1.02757	0.109307
11	A11	64	76.3427	1.01881	0.109264
11	A11	65	76.5998	1.00959	0.109374
11	A11	66	76.8568	0.997186	0.109567
11	A11	67	77.1139	0.990741	0.10973
11	A11	68	77.371	0.98162	0.10969
11	A11	69	77.628	0.966177	0.109286
11	A11	70	77.8851	0.958066	0.108491
11	A11	71	78.1421	0.945497	0.107485
11	A11	72	78.3992	0.938558	0.106588
11	A11	73	78.6562	0.931817	0.106097
11	A11	74	78.9133	0.918868	0.106126
11	A11	75	79.1703	0.910452	0.106572
11	A11	76	79.4274	0.900718	0.107197
11	A11	77	79.6845	0.888773	0.107781
11	A11	78	79.9415	0.879958	0.108236
11	A11	79	80.1986	0.869966	0.108627
11	A11	80	80.4556	0.858534	0.109088
11	A11	81	80.7127	0.850358	0.109707
11	A11	82	80.9697	0.841133	0.110425
11	A11	83	81.2268	0.832732	0.111041
11	A11	84	81.4839	0.815703	0.111304
11	A11	85	81.7409	0.807678	0.111045
11	A11	86	81.998	0.798212	0.11024
11	A11	87	82.255	0.789744	0.109014
11	A11	88	82.5121	0.778663	0.107571
11	A11	89	82.7691	0.764809	0.106142
11	A11	90	83.0262	0.760231	0.10493
11	A11	91	83.2832	0.750847	0.10408
11	A11	92	83.5403	0.740397	0.103644
11	A11	93	83.7974	0.730587	0.103596
11	A11	94	84.0544	0.721294	0.103908
11	A11	95	84.3115	0.711983	0.104646
11	A11	96	84.5685	0.701907	0.10607
11	A11	97	84.8256	0.693288	0.108648
11	A11	98	85.0826	0.681408	0.112959
11	A11	99	85.3397	0.674565	0.119487
11	A11	100	85.5968	0.663731	0.128425
11	A11	101	85.8538	0.654262	0.139693
11	A11	102	86.1109	0.641542	0.153417
11	A11	103	86.3679	0.622035	0.17084
11	A11	104	86.625	0.596655	0.195174
11	A11	105	86.882	0.579667	0.231541
11	A11	106	87.1391	0.56852	0.285262
11	A11	107	87.3961	0.552666	0.358695
11	A11	108	87.6532	0.524843	0.447966
11	A11	109	87.9103	0.461567	0.541623
11	A11	110	88.1673	0.338199	0.62258
11	A11	111	88.4244	0.241455	0.673014
11	A11	112	88.6814	0.184237	0.68018
11	A11	113	88.9385	0.0825839	0.640619
11	A11	114	89.1955	0.0296894	0.561099
11	A11	115	89.4526	0.0137493	0.456182
11	A11	116	89.7096	0.0122408	0.343616
11	A11	117	89.9667	0.0129625	0.239367
11	A11	118	90.2238	0.011948	0.154032
11	A11	119	90.4808	0.0110513	0.0916138
11	A11	120	90.7379	0.0111818	0.0505922
11	A11	121	90.9949	0.0109421	0.026286
11	A11	122	91.252	0.0106222	0.0132578
11	A11	123	91.509	0.0104697	0.00690314
11	A11	124	91.7661	0.00992866	0.00404499
11	A11	125	92.0232	0.00996287	0.00282744
11	A11	126	92.2802	0.00988401	0.00231858
11	A11	127	92.5373	0.00948813	0.00211057
11	A11	128	92.7943	0.0100547	0.00203706
11	A11	129	93.0514	0.00903685	0.0020182
11	A11	130	93.3084	0.00890924	0.00199872
11	A11	131	93.5655	0.00907293	0.00193644
11	A11	132	93.8225	0.00839988	0.00180675
11	A11	133	94.0796	0.00873048	0.00160482
11	A11	134	94.3367	0.0085234	0.00134216
11	A11	135	94.5937	0.00787972	0.00104215
11	A11	136	94.8508	0.00838781	0.000736396
12	A12	1	60.1482	1.69523	0.136437
12	A12	2	60.4053	1.68675	0.137066
12	A12	3	60.6623	1.67264	0.137543
12	A12	4	60.9194	1.66179	0.1378
12	A12	5	61.1764	1.65103	0.137876
12	A12	6	61.4335	1.63952	0.13783
12	A12	7	61.6905	1.62675	0.137674
12	A12	8	61.9476	1.61566	0.13737
12	A12	9	62.2046	1.60357	0.136913
12	A12	10	62.4617	1.58816	0.13642
12	A12	11	62.7188	1.57829	0.136111
12	A12	12	62.9758	1.56846	0.136185
12	A12	13	63.2329	1.55542	0.136648
12	A12	14	63.4899	1.54597	0.137246
12	A12	15	63.747	1.53377	0.137558
12	A12	16	64.004	1.51698	0.137215
12	A12	17	64.2611	1.50558	0.136122
12	A12	18	64.5182	1.49552	0.134545
12	A12	19	64.7752	1.48289	0.133008
12	A12	20	65.0323	1.46859	0.132062
12	A12	21	65.2893	1.46269	0.132019
12	A12	22	65.5464	1.45485	0.132816
12	A12	23	65.8034	1.43762	0.134046
12	A12	24	66.0605	1.42605	0.135168
12	A12	25	66.3175	1.41337	0.135739
12	A12	26	66.5746	1.40515	0.135591
12	A12	27	66.8317	1.38607	0.134842
12	A12	28	67.0887	1.37733	0.133818
12	A12	29	67.3458	1.36839	0.132913
12	A12	30	67.6028	1.35567	0.132468
12	A12	31	67.8599	1.34274	0.132679
12	A12	32	68.1169	1.33136	0.133525
12	A12	33	68.374	1.32358	0.134714
12	A12	34	68.6311	1.30999	0.135707
12	A12	35	68.8881	1.29922	0.135874
12	A12	36	69.1452	1.2831	0.134781
12	A12	37	69.4022	1.27004	0.132463
12	A12	38	69.6593	1.25734	0.129505
12	A12	39	69.9163	1.24727	0.12684
12	A12	40	70.1734	1.24001	0.125329
12	A12	41	70.4304	1.23188	0.125364
12	A12	42	70.6875	1.21938	0.126701
12	A12	43	70.9446	1.2089	0.128625
12	A12	44	71.2016	1.19691	0.130314
12	A12	45	71.4587	1.18062	0.131194
12	A12	46	71.7157	1.16933	0.131116
12	A12	47	71.9728	1.16185	0.130299
12	A12	48	72.2298	1.14889	0.129141
12	A12	49	72.4869	1.13505	0.128023
12	A12	50	72.7439	1.12693	0.127203
12	A12	51	73.001	1.1167	0.126773
12	A12	52	73.2581	1.1033	0.126677
12	A12	53	73.5151	1.09388	0.126744
12	A12	54	73.7722	1.08377	0.12675
12	A12	55	74.0292	1.06941	0.126507
12	A12	56	74.2863	1.05887	0.125932
12	A12	57	74.5433	1.04996	0.125086
12	A12	58	74.8004	1.03516	0.124147
12	A12	59	75.0574	1.02744	0.123317
12	A12	60	75.3145	1.01655	0.122722
12	A12	61	75.5716	1.00685	0.122348
12	A12	62	75.8286	0.994458	0.122056
12	A12	63	76.0857	0.984643	0.121673
12	A12	64	76.3427	0.9727	0.121098
12	A12	65	76.5998	0.961584	0.120365
12	A12	66	76.8568	0.952531	0.119627
12	A12	67	77.1139	0.941984	0.119069
12	A12	68	77.371	0.931583	0.118805
12	A12	69	77.628	0.922972	0.118826
12	A12	70	77.8851	0.910405	0.119009
12	A12	71	78.1421	0.89976	0.119185
12	A12	72	78.3992	0.891967	0.119212
12	A12	73	78.6562	0.87714	0.119021
12	A12	74	78.9133	0.868862	0.118632
12	A12	75	79.1703	0.859976	0.118131
12	A12	76	79.4274	0.846407	0.117637
12	A12	77	79.6845	0.83877	0.117282
12	A12	78	79.9415	0.827857	0.117182
12	A12	79	80.1986	0.817034	0.117407
12	A12	80	80.4556	0.807071	0.117939
12	A12	81	80.7127	0.799795	0.118643
12	A12	82	80.9697	0.785559	0.119281
12	A12	83	81.2268	0.776478	0.119584
12	A12	84	81.4839	0.764989	0.119353
12	A12	85	81.7409	0.753449	0.118546
12	A12	86	81.998	0.743259	0.117278
12	A12	87	82.255	0.735255	0.115762
12	A12	88	82.5121	0.72367	0.114224
12	A12	89	82.7691	0.714667	0.112839
12	A12	90	83.0262	0.704124	0.111725
12	A12	91	83.2832	0.695122	0.110953
12	A12	92	83.5403	0.685142	0.110559
12	A12	93	83.7974	0.677009	0.110542
12	A12	94	84.0544	0.666645	0.110883
12	A12	95	84.3115	0.656545	0.111606
12	A12	96	84.5685	0.647186	0.112871
12	A12	97	84.8256	0.636073	0.115043
12	A12	98	85.0826	0.626736	0.118653
12	A12	99	85.3397	0.618504	0.124223
12	A12	100	85.5968	0.607424	0.132043
12	A12	101	85.8538	0.597514	0.142124
12	A12	102	86.1109	0.587487	0.154574
12	A12	103	86.3679	0.569164	0.17046
12	A12	104	86.625	0.545999	0.192745
12	A12	105	86.882	0.524849	0.226451
12	A12	106	87.1391	0.516148	0.277242
12	A12	107	87.3961	0.502728	0.348328
12	A12	108	87.6532	0.4793	0.436925
12	A12	109	87.9103	0.428546	0.532333
12	A12	110	88.1673	0.316161	0.617353
12	A12	111	88.4244	0.204063	0.673076
12	A12	112	88.6814	0.153034	0.685147
12	A12	113	88.9385	0.0659194	0.648693
12	A12	114	89.1955	-0.00518033	0.569852
12	A12	115	89.4526	-0.00972637	0.463482
12	A12	116	89.7096	-0.0100074	0.34825
12	A12	117	89.9667	-0.010649	0.241176
12	A12	118	90.2238	-0.0104955	0.153622
12	A12	119	90.4808	-0.0110157	0.0898954
12	A12	120	90.7379	-0.0114466	0.048385
12	A12	121	90.9949	-0.0109585	0.0241268
12	A12	122	91.252	-0.011406	0.0114
12	A12	123	91.509	-0.0112395	0.00541561
12	A12	124	91.7661	-0.0120484	0.00291763
12	A12	125	92.0232	-0.0115617	0.00203394
12	A12	126	92.2802	-0.0117564	0.00183289
12	A12	127	92.5373	-0.0116953	0.00189772
12	A12	128	92.7943	-0.0123149	0.00204248
12	A12	129	93.0514	-0.0126794	0.0021693
12	A12	130	93.3084	-0.0125721	0.00221814
12	A12	131	93.5655	-0.0129785	0.00215772
12	A12	132	93.8225	-0.0131436	0.0019844
12	A12	133	94.0796	-0.0133838	0.00171729
12	A12	134	94.3367	-0.0133837	0.00139017
12	A12	135	94.5937	-0.0133542	0.00104334
12	A12	136	94.8508	-0.013641	0.000716107
13	A13	1	60.1482	1.78852	0.119117
13	A13	2	60.4053	1.77868	0.121111
13	A13	3	60.6623	1.76465	0.12301
13	A13	4	60.9194	1.75469	0.124253
13	A13	5	61.1764	1.74534	0.124462
13	A13	6	61.4335	1.72871	0.123609
13	A13	7	61.6905	1.71325	0.122031
13	A13	8	61.9476	1.70534	0.120272
13	A13	9	62.2046	1.69815	0.118834
13	A13	10	62.4617	1.68718	0.117994
13	A13	11	62.7188	1.67373	0.117764
13	A13	12	62.9758	1.66054	0.117975
13	A13	13	63.2329	1.65104	0.118387
13	A13	14	63.4899	1.64202	0.118739
13	A13	15	63.747	1.63226	0.118808
13	A13	16	64.004	1.61531	0.118465
13	A13	17	64.2611	1.60397	0.11776
13	A13	18	64.5182	1.59161	0.116923
13	A13	19	64.7752	1.58807	0.116263
13	A13	20	65.0323	1.57433	0.116033
13	A13	21	65.2893	1.55792	0.116313
13	A13	22	65.5464	1.55403	0.11699
13	A13	23	65.8034	1.54236	0.117786
13	A13	24	66.0605	1.52746	0.118337
13	A13	25	66.3175	1.51956	0.118304
13	A13	26	66.5746	1.50358	0.117493
13	A13	27	66.8317	1.49554	0.115953
13	A13	28	67.0887	1.48007	0.113992
13	A13	29	67.3458	1.47224	0.112087
13	A13	30	67.6028	1.46169	0.110725
13	A13	31	67.8599	1.45371	0.110229
13	A13	32	68.1169	1.44185	0.110655
13	A13	33	68.374	1.43235	0.111754
13	A13	34	68.6311	1.42097	0.113068
13	A13	35	68.8881	1.41403	0.114086
13	A13	36	69.1452	1.39766	0.114448
13	A13	37	69.4022	1.38402	0.114093
13	A13	38	69.6593	1.37543	0.113252
13	A13	39	69.9163	1.36639	0.112304
13	A13	40	70.1734	1.35618	0.111588
13	A13	41	70.4304	1.34692	0.111267
13	A13	42	70.6875	1.33391	0.111326
13	A13	43	70.9446	1.32039	0.111624
13	A13	44	71.2016	1.31569	0.111956
13	A13	45	71.4587	1.30623	0.112091
13	A13	46	71.7157	1.28916	0.111827
13	A13	47	71.9728	1.27825	0.111072
13	A13	48	72.2298	1.27151	0.109917
13	A13	49	72.4869	1.25718	0.108611
13	A13	50	72.7439	1.25122	0.107472
13	A13	51	73.001	1.23721	0.106756
13	A13	52	73.2581	1.23102	0.106569
13	A13	53	73.5151	1.21959	0.106842
13	A13	54	73.7722	1.21116	0.107377
13	A13	55	74.0292	1.19747	0.107926
13	A13	56	74.2863	1.18722	0.108273
13	A13	57	74.5433	1.18006	0.108282
13	A13	58	74.8004	1.16786	0.107935
13	A13	59	75.0574	1.15551	0.107324
13	A13	60	75.3145	1.14476	0.106624
13	A13	61	75.5716	1.13877	0.106014
13	A13	62	75.8286	1.12821	0.105597
13	A13	63	76.0857	1.11599	0.105345
13	A13	64	76.3427	1.10772	0.105107
13	A13	65	76.5998	1.09574	0.104687
13	A13	66	76.8568	1.08768	0.103923
13	A13	67	77.1139	1.07701	0.102773
13	A13	68	77.371	1.06456	0.101346
13	A13	69	77.628	1.05817	0.0998971
13	A13	70	77.8851	1.04579	0.0987338
13	A13	71	78.1421	1.04002	0.0980926
13	A13	72	78.3992	1.03338	0.098025
13	A13	73	78.6562	1.01835	0.0983642
13	A13	74	78.9133	1.01245	0.0987979
13	A13	75	79.1703	1.00239	0.0990104
13	A13	76	79.4274	0.990134	0.0988239
13	A13	77	79.6845	0.983112	0.0982725
13	A13	78	79.9415	0.970927	0.0975839
13	A13	79	80.1986	0.963178	0.0970715
13	A13	80	80.4556	0.958068	0.0969855
13	A13	81	80.7127	0.943694	0.0973886
13	A13	82	80.9697	0.939076	0.098128
13	A13	83	81.2268	0.928075	0.0989199
13	A13	84	81.4839	0.916481	0.0995071
13	A13	85	81.7409	0.907182	0.099802
13	A13	86	81.998	0.896529	0.0999252
13	A13	87	82.255	0.889439	0.100117
13	A13	88	82.5121	0.880887	0.100573
13	A13	89	82.7691	0.871294	0.101323
13	A13	90	83.0262	0.860546	0.102223
13	A13	91	83.2832	0.849223	0.10307
13	A13	92	83.5403	0.840899	0.103748
13	A13	93	83.7974	0.829737	0.104323
13	A13	94	84.0544	0.819526	0.105031
13	A13	95	84.3115	0.811757	0.10617
13	A13	96	84.5685	0.800462	0.107942
13	A13	97	84.8256	0.790103	0.110316
13	A13	98	85.0826	0.784214	0.112978
13	A13	99	85.3397	0.768654	0.115416
13	A13	100	85.5968	0.754379	0.117112
13	A13	101	85.8538	0.743795	0.117759
13	A13	102	86.1109	0.732586	0.117409
13	A13	103	86.3679	0.72296	0.116487
13	A13	104	86.625	0.709432	0.115699
13	A13	105	86.882	0.697411	0.115864
13	A13	106	87.1391	0.687394	0.117775
13	A13	107	87.3961	0.674593	0.122176
13	A13	108	87.6532	0.661518	0.130007
13	A13	109	87.9103	0.649172	0.142933
13	A13	110	88.1673	0.635301	0.163973
13	A13	111	88.4244	0.621039	0.197723
13	A13	112	88.6814	0.607696	0.249551
13	A13	113	88.9385	0.590177	0.32331
13	A13	114	89.1955	0.565065	0.417884
13	A13	115	89.4526	0.527844	0.524033
13	A13	116	89.7096	0.45429	0.623828
13	A13	117	89.9667	0.311334	0.694468
13	A13	118	90.2238	0.152348	0.715981
13	A13	119	90.4808	0.0651838	0.679458
13	A13	120	90.7379	0.0435507	0.591294
13	A13	121	90.9949	0.038857	0.470835
13	A13	122	91.252	0.0368042	0.342682
13	A13	123	91.509	0.0372856	0.227949
13	A13	124	91.7661	0.0362846	0.138746
13	A13	125	92.0232	0.0360098	0.0775292
13	A13	126	92.2802	0.0361443	0.0400774
13	A13	127	92.5373	0.0354056	0.0194994
13	A13	128	92.7943	0.0353788	0.00927912
13	A13	129	93.0514	0.0351693	0.00467099
13	A13	130	93.3084	0.0353091	0.00279941
13	A13	131	93.5655	0.0354988	0.00214948
13	A13	132	93.8225	0.0352508	0.00198457
13	A13	133	94.0796	0.0342835	0.00194127
13	A13	134	94.3367	0.0343114	0.00183156
13	A13	135	94.5937	0.0337758	0.00157891
13	A13	136	94.8508	0.0337021	0.00119891
14	A14	1	60.1482	1.75134	0.118851
14	A14	2	60.4053	1.74482	0.119888
14	A14	3	60.6623	1.72902	0.120769
14	A14	4	60.9194	1.71807	0.121234
14	A14	5	61.1764	1.71021	0.121164
14	A14	6	61.4335	1.69655	0.120617
14	A14	7	61.6905	1.6833	0.119821
14	A14	8	61.9476	1.67136	0.119103
14	A14	9	62.2046	1.6619	0.118784
14	A14	10	62.4617	1.65266	0.119038
14	A14	11	62.7188	1.6406	0.119804
14	A14	12	62.9758	1.6294	0.120785
14	A14	13	63.2329	1.61551	0.12155
14	A14	14	63.4899	1.60671	0.121713
14	A14	15	63.747	1.59119	0.121088
14	A14	16	64.004	1.58027	0.119782
14	A14	17	64.2611	1.56665	0.118164
14	A14	18	64.5182	1.55755	0.116698
14	A14	19	64.7752	1.54592	0.115751
14	A14	20	65.0323	1.54157	0.115438
14	A14	21	65.2893	1.52418	0.115633
14	A14	22	65.5464	1.51372	0.116091
14	A14	23	65.8034	1.50303	0.116596
14	A14	24	66.0605	1.49382	0.11703
14	A14	25	66.3175	1.47553	0.117326
14	A14	26	66.5746	1.47461	0.117386
14	A14	27	66.8317	1.45757	0.117058
14	A14	28	67.0887	1.4453	0.116225
14	A14	29	67.3458	1.43439	0.114913
14	A14	30	67.6028	1.42026	0.113358
14	A14	31	67.8599	1.41509	0.111932
14	A14	32	68.1169	1.40092	0.110992
14	A14	33	68.374	1.39466	0.110723
14	A14	34	68.6311	1.38106	0.111084
14	A14	35	68.8881	1.37187	0.111847
14	A14	36	69.1452	1.3625	0.112704
14	A14	37	69.4022	1.34626	0.113374
14	A14	38	69.6593	1.34049	0.113666
14	A14	39	69.9163	1.32652	0.1135
14	A14	40	70.1734	1.31456	0.112909
14	A14	41	70.4304	1.30676	0.112031
14	A14	42	70.6875	1.29303	0.111081
14	A14	43	70.9446	1.28271	0.110293
14	A14	44	71.2016	1.27258	0.109827
14	A14	45	71.4587	1.26565	0.109695
14	A14	46	71.7157	1.25303	0.109744
14	A14	47	71.9728	1.24101	0.109742
14	A14	48	72.2298	1.23062	0.109506
14	A14	49	72.4869	1.21903	0.109001
14	A14	50	72.7439	1.20897	0.108343
14	A14	51	73.001	1.20047	0.107722
14	A14	52	73.2581	1.18961	0.107307
14	A14	53	73.5151	1.17794	0.107177
14	A14	54	73.7722	1.16775	0.107285
14	A14	55	74.0292	1.16056	0.107466
14	A14	56	74.2863	1.14813	0.107476
14	A14	57	74.5433	1.13769	0.107089
14	A14	58	74.8004	1.12501	0.106204
14	A14	59	75.0574	1.11507	0.104918
14	A14	60	75.3145	1.10661	0.103497
14	A14	61	75.5716	1.09555	0.102271
14	A14	62	75.8286	1.08917	0.101486
14	A14	63	76.0857	1.07673	0.101222
14	A14	64	76.3427	1.06767	0.101372
14	A14	65	76.5998	1.05974	0.101697
14	A14	66	76.8568	1.04779	0.101922
14	A14	67	77.1139	1.0391	0.101824
14	A14	68	77.371	1.02575	0.101319
14	A14	69	77.628	1.01914	0.100473
14	A14	70	77.8851	1.00791	0.0994669
14	A14	71	78.1421	0.998621	0.0985079
14	A14	72	78.3992	0.991073	0.097753
14	A14	73	78.6562	0.98205	0.0972854
14	A14	74	78.9133	0.969012	0.0971356
14	A14	75	79.1703	0.962674	0.0973115
14	A14	76	79.4274	0.952414	0.0977931
14	A14	77	79.6845	0.945037	0.098494
14	A14	78	79.9415	0.934181	0.0992405
14	A14	79	80.1986	0.924287	0.0998173
14	A14	80	80.4556	0.913983	0.100062
14	A14	81	80.7127	0.903102	0.0999471
14	A14	82	80.9697	0.892731	0.0995849
14	A14	83	81.2268	0.888059	0.0991369
14	A14	84	81.4839	0.875074	0.0987118
14	A14	85	81.7409	0.867517	0.0983226
14	A14	86	81.998	0.856427	0.0979368
14	A14	87	82.255	0.845582	0.0975713
14	A14	88	82.5121	0.838884	0.0973449
14	A14	89	82.7691	0.828526	0.0974584
14	A14	90	83.0262	0.821315	0.0981065
14	A14	91	83.2832	0.809555	0.0993941
14	A14	92	83.5403	0.801277	0.101296
14	A14	93	83.7974	0.793417	0.103672
14	A14	94	84.0544	0.78167	0.106312
14	A14	95	84.3115	0.76721	0.108995
14	A14	96	84.5685	0.761791	0.111515
14	A14	97	84.8256	0.750337	0.113691
14	A14	98	85.0826	0.735343	0.115367
14	A14	99	85.3397	0.725251	0.116417
14	A14	100	85.5968	0.713073	0.116764
14	A14	101	85.8538	0.702843	0.116398
14	A14	102	86.1109	0.691709	0.115413
14	A14	103	86.3679	0.678109	0.114076
14	A14	104	86.625	0.668105	0.112889
14	A14	105	86.882	0.654734	0.112584
14	A14	106	87.1391	0.645402	0.114024
14	A14	107	87.3961	0.633516	0.118118
14	A14	108	87.6532	0.621713	0.125931
14	A14	109	87.9103	0.609925	0.139116
14	A14	110	88.1673	0.59421	0.160509
14	A14	111	88.4244	0.580444	0.194436
14	A14	112	88.6814	0.566614	0.246012
14	A14	113	88.9385	0.549222	0.318943
14	A14	114	89.1955	0.524727	0.412103
14	A14	115	89.4526	0.488104	0.516359
14	A14	116	89.7096	0.414164	0.614
14	A14	117	89.9667	0.270073	0.682543
14	A14	118	90.2238	0.111003	0.70241
14	A14	119	90.4808	0.0281734	0.665077
14	A14	120	90.7379	0.00740932	0.577185
14	A14	121	90.9949	0.00284709	0.458065
14	A14	122	91.252	0.00217231	0.33204
14	A14	123	91.509	0.00234743	0.219785
14	A14	124	91.7661	0.00175572	0.132975
14	A14	125	92.0232	0.00103717	0.0737716
14	A14	126	92.2802	0.00096492	0.0378396
14	A14	127	92.5373	0.00117893	0.0183153
14	A14	128	92.7943	0.000983991	0.00877019
14	A14	129	93.0514	0.000363034	0.00454195
14	A14	130	93.3084	0.000149141	0.00281528
14	A14	131	93.5655	-0.000209576	0.00213073
14	A14	132	93.8225	0.000885051	0.00182364
14	A14	133	94.0796	-0.000303213	0.00161583
14	A14	134	94.3367	-0.000535627	0.00139196
14	A14	135	94.5937	-0.000693273	0.00111018
14	A14	136	94.8508	-0.000913384	0.000778536
15	A15	1	60.1482	1.74862	0.12135
15	A15	2	60.4053	1.74185	0.122243
15	A15	3	60.6623	1.72527	0.122744
15	A15	4	60.9194	1.71017	0.122779
15	A15	5	61.1764	1.70447	0.122498
15	A15	6	61.4335	1.69664	0.122128
15	A15	7	61.6905	1.68144	0.121808
15	A15	8	61.9476	1.66993	0.121535
15	A15	9	62.2046	1.65797	0.121237
15	A15	10	62.4617	1.64836	0.120896
15	A15	11	62.7188	1.63503	0.120595
15	A15	12	62.9758	1.62603	0.120462
15	A15	13	63.2329	1.61188	0.120568
15	A15	14	63.4899	1.60506	0.120846
15	A15	15	63.747	1.59289	0.121114
15	A15	16	64.004	1.57898	0.121156
15	A15	17	64.2611	1.56741	0.120862
15	A15	18	64.5182	1.55639	0.120298
15	A15	19	64.7752	1.54653	0.119679
15	A15	20	65.0323	1.53299	0.11926
15	A15	21	65.2893	1.5232	0.119185
15	A15	22	65.5464	1.51572	0.119404
15	A15	23	65.8034	1.50268	0.119692
15	A15	24	66.0605	1.4887	0.119769
15	A15	25	66.3175	1.47842	0.11945
15	A15	26	66.5746	1.46731	0.11873
15	A15	27	66.8317	1.45589	0.117789
15	A15	28	67.0887	1.44401	0.116891
15	A15	29	67.3458	1.43387	0.116267
15	A15	30	67.6028	1.42565	0.116031
15	A15	31	67.8599	1.41244	0.116149
15	A15	32	68.1169	1.40305	0.116487
15	A15	33	68.374	1.38991	0.116861
15	A15	34	68.6311	1.37961	0.117075
15	A15	35	68.8881	1.37053	0.116958
15	A15	36	69.1452	1.3592	0.116405
15	A15	37	69.4022	1.34437	0.115439
15	A15	38	69.6593	1.33513	0.114239
15	A15	39	69.9163	1.32256	0.113075
15	A15	40	70.1734	1.31713	0.112184
15	A15	41	70.4304	1.30636	0.111653
15	A15	42	70.6875	1.29398	0.111424
15	A15	43	70.9446	1.28316	0.11138
15	A15	44	71.2016	1.27162	0.111451
15	A15	45	71.4587	1.26217	0.111626
15	A15	46	71.7157	1.25452	0.111891
15	A15	47	71.9728	1.24269	0.112176
15	A15	48	72.2298	1.23043	0.112379
15	A15	49	72.4869	1.21952	0.112443
15	A15	50	72.7439	1.20647	0.112395
15	A15	51	73.001	1.20384	0.112304
15	A15	52	73.2581	1.18685	0.112199
15	A15	53	73.5151	1.17926	0.112022
15	A15	54	73.7722	1.16618	0.111659
15	A15	55	74.0292	1.15821	0.111016
15	A15	56	74.2863	1.14456	0.110088
15	A15	57	74.5433	1.13538	0.108974
15	A15	58	74.8004	1.12721	0.107836
15	A15	59	75.0574	1.11532	0.106839
15	A15	60	75.3145	1.10427	0.106087
15	A15	61	75.5716	1.0973	0.10559
[truncated: 42,099 more rows]
