# Supplementary material for: Transcriptomic identification of HBx-associated hub genes in hepatocellular carcinoma
Source: PeerJ. 2021 Dec 22;9:e12697. doi: 10.7717/peerj.12697 (PMC8710059; doi:10.7717/peerj.12697)
Supplement: Supplemental Information 12 [file peerj-09-12697-s012.xlsx]

## Sheet: Sample Setup
Block Type	384-Well Block
Calibration Background is expired	Yes
Calibration Background performed on	10-12-2018 11:47:46 PDT
Calibration FAM is expired	Yes
Calibration FAM performed on	10-23-2018 10:23:19 PDT
Calibration MELTDOCTOR is expired	Yes
Calibration MELTDOCTOR performed on	09-26-2017 21:22:46 PDT
Calibration NED is expired	Yes
Calibration NED performed on	10-23-2018 10:33:14 PDT
Calibration ROI is expired	Yes
Calibration ROI performed on	10-12-2018 09:37:21 PDT
Calibration ROX is expired	Yes
Calibration ROX performed on	10-23-2018 10:07:21 PDT
Calibration SYBR is expired	Yes
Calibration SYBR performed on	10-23-2018 09:57:53 PDT
Calibration TAMRA is expired	Yes
Calibration TAMRA performed on	10-23-2018 10:45:25 PDT
Calibration Uniformity is expired	Yes
Calibration Uniformity performed on	10-12-2018 10:06:59 PDT
Calibration VIC is expired	Yes
Calibration VIC performed on	10-23-2018 10:54:25 PDT
Chemistry	SYBR_GREEN
Date Created	09-13-2021 23:08:57 PDT
Experiment File Name	D:\NZZ\2021-09-13 213756.eds
Experiment Name	2021-09-13 213756
Experiment Run End Time	09-13-2021 16:11:59 PDT
Experiment Type	Comparative Cт (ΔΔCт)
Instrument Name	285880860
Instrument Serial Number	285880860
Instrument Type	QuantStudio 12K Flex
Passive Reference	ROX
Quantification Cycle Method	Ct
Signal Smoothing On	true
Stage/ Cycle where Analysis is performed	Stage 2, Step 2
Well	Well Position	Sample Name	Sample Color	Biogroup Name	Biogroup Color	Target Name	Target Color	Task	Reporter	Quencher	Quantity	Comments
1	A1
2	A2
3	A3
4	A4
5	A5
6	A6
7	A7
8	A8
9	A9
10	A10
11	A11
12	A12
13	A13
14	A14
15	A15
16	A16
17	A17
18	A18
19	A19
20	A20
21	A21
22	A22	HepG2	RGB(176,23,31)			hARG1	RGB(0,0,255)	UNKNOWN	SYBR	None
23	A23	HepG2	RGB(176,23,31)			hARG1	RGB(0,0,255)	UNKNOWN	SYBR	None
24	A24	HepG2	RGB(176,23,31)			hARG1	RGB(0,0,255)	UNKNOWN	SYBR	None
25	B1
26	B2
27	B3
28	B4
29	B5
30	B6
31	B7
32	B8
33	B9
34	B10
35	B11
36	B12
37	B13
38	B14
39	B15
40	B16
41	B17
42	B18
43	B19
44	B20
45	B21
46	B22	HepG2 2.15	RGB(0,0,255)			hARG1	RGB(0,0,255)	UNKNOWN	SYBR	None
47	B23	HepG2 2.15	RGB(0,0,255)			hARG1	RGB(0,0,255)	UNKNOWN	SYBR	None
48	B24	HepG2 2.15	RGB(0,0,255)			hARG1	RGB(0,0,255)	UNKNOWN	SYBR	None
49	C1
50	C2
51	C3
52	C4
53	C5
54	C6
55	C7
56	C8
57	C9
58	C10
59	C11
60	C12
61	C13
62	C14
63	C15
64	C16
65	C17
66	C18
67	C19
68	C20
69	C21
70	C22	VEC-7721	RGB(0,139,69)			hARG1	RGB(0,0,255)	UNKNOWN	SYBR	None
71	C23	VEC-7721	RGB(0,139,69)			hARG1	RGB(0,0,255)	UNKNOWN	SYBR	None
72	C24	VEC-7721	RGB(0,139,69)			hARG1	RGB(0,0,255)	UNKNOWN	SYBR	None
73	D1
74	D2
75	D3
76	D4
77	D5
78	D6
79	D7
80	D8
81	D9
82	D10
83	D11
84	D12
85	D13
86	D14
87	D15
88	D16
89	D17
90	D18
91	D19
92	D20
93	D21
94	D22	HBx-7721	RGB(255,127,0)			hARG1	RGB(0,0,255)	UNKNOWN	SYBR	None
95	D23	HBx-7721	RGB(255,127,0)			hARG1	RGB(0,0,255)	UNKNOWN	SYBR	None
96	D24	HBx-7721	RGB(255,127,0)			hARG1	RGB(0,0,255)	UNKNOWN	SYBR	None
97	E1
98	E2
99	E3
100	E4
101	E5
102	E6
103	E7
104	E8
105	E9
106	E10
107	E11
108	E12
109	E13
110	E14
111	E15
112	E16
113	E17
114	E18
115	E19
116	E20
117	E21
118	E22	HepG2	RGB(176,23,31)			hCyclophilion	RGB(176,23,31)	UNKNOWN	SYBR	None
119	E23	HepG2	RGB(176,23,31)			hCyclophilion	RGB(176,23,31)	UNKNOWN	SYBR	None
120	E24	HepG2	RGB(176,23,31)			hCyclophilion	RGB(176,23,31)	UNKNOWN	SYBR	None
121	F1
122	F2
123	F3
124	F4
125	F5
126	F6
127	F7
128	F8
129	F9
130	F10
131	F11
132	F12
133	F13
134	F14
135	F15
136	F16
137	F17
138	F18
139	F19
140	F20
141	F21
142	F22	HepG2 2.15	RGB(0,0,255)			hCyclophilion	RGB(176,23,31)	UNKNOWN	SYBR	None
143	F23	HepG2 2.15	RGB(0,0,255)			hCyclophilion	RGB(176,23,31)	UNKNOWN	SYBR	None
144	F24	HepG2 2.15	RGB(0,0,255)			hCyclophilion	RGB(176,23,31)	UNKNOWN	SYBR	None
145	G1
146	G2
147	G3
148	G4
149	G5
150	G6
151	G7
152	G8
153	G9
154	G10
155	G11
156	G12
157	G13
158	G14
159	G15
160	G16
161	G17
162	G18
163	G19
164	G20
165	G21
166	G22	VEC-7721	RGB(0,139,69)			hCyclophilion	RGB(176,23,31)	UNKNOWN	SYBR	None
167	G23	VEC-7721	RGB(0,139,69)			hCyclophilion	RGB(176,23,31)	UNKNOWN	SYBR	None
168	G24	VEC-7721	RGB(0,139,69)			hCyclophilion	RGB(176,23,31)	UNKNOWN	SYBR	None
169	H1
170	H2
171	H3
172	H4
173	H5
174	H6
175	H7
176	H8
177	H9
178	H10
179	H11
180	H12
181	H13
182	H14
183	H15
184	H16
185	H17
186	H18
187	H19
188	H20
189	H21
190	H22	HBx-7721	RGB(255,127,0)			hCyclophilion	RGB(176,23,31)	UNKNOWN	SYBR	None
191	H23	HBx-7721	RGB(255,127,0)			hCyclophilion	RGB(176,23,31)	UNKNOWN	SYBR	None
192	H24	HBx-7721	RGB(255,127,0)			hCyclophilion	RGB(176,23,31)	UNKNOWN	SYBR	None
193	I1
194	I2
195	I3
196	I4
197	I5
198	I6
199	I7
200	I8
201	I9
202	I10
203	I11
204	I12
205	I13
206	I14
207	I15
208	I16
209	I17
210	I18
211	I19
212	I20
213	I21
214	I22
215	I23
216	I24
217	J1
218	J2
219	J3
220	J4
221	J5
222	J6
223	J7
224	J8
225	J9
226	J10
227	J11
228	J12
229	J13
230	J14
231	J15
232	J16
233	J17
234	J18
235	J19
236	J20
237	J21
238	J22
239	J23
240	J24
241	K1
242	K2
243	K3
244	K4
245	K5
246	K6
247	K7
248	K8
249	K9
250	K10
251	K11
252	K12
253	K13
254	K14
255	K15
256	K16
257	K17
258	K18
259	K19
260	K20
261	K21
262	K22
263	K23
264	K24
265	L1
266	L2
267	L3
268	L4
269	L5
270	L6
271	L7
272	L8
273	L9
274	L10
275	L11
276	L12
277	L13
278	L14
279	L15
280	L16
281	L17
282	L18
283	L19
284	L20
285	L21
286	L22
287	L23
288	L24
289	M1
290	M2
291	M3
292	M4
293	M5
294	M6
295	M7
296	M8
297	M9
298	M10
299	M11
300	M12
301	M13
302	M14
303	M15
304	M16
305	M17
306	M18
307	M19
308	M20
309	M21
310	M22
311	M23
312	M24
313	N1
314	N2
315	N3
316	N4
317	N5
318	N6
319	N7
320	N8
321	N9
322	N10
323	N11
324	N12
325	N13
326	N14
327	N15
328	N16
329	N17
330	N18
331	N19
332	N20
333	N21
334	N22
335	N23
336	N24
337	O1
338	O2
339	O3
340	O4
341	O5
342	O6
343	O7
344	O8
345	O9
346	O10
347	O11
348	O12
349	O13
350	O14
351	O15
352	O16
353	O17
354	O18
355	O19
356	O20
357	O21
358	O22
359	O23
360	O24
361	P1
362	P2
363	P3
364	P4
365	P5
366	P6
367	P7
368	P8
369	P9
370	P10
371	P11
372	P12
373	P13
374	P14
375	P15
376	P16
377	P17
378	P18
379	P19
380	P20
381	P21
382	P22
383	P23
384	P24

## Sheet: Amplification Data
Block Type	384-Well Block
Calibration Background is expired	Yes
Calibration Background performed on	10-12-2018 11:47:46 PDT
Calibration FAM is expired	Yes
Calibration FAM performed on	10-23-2018 10:23:19 PDT
Calibration MELTDOCTOR is expired	Yes
Calibration MELTDOCTOR performed on	09-26-2017 21:22:46 PDT
Calibration NED is expired	Yes
Calibration NED performed on	10-23-2018 10:33:14 PDT
Calibration ROI is expired	Yes
Calibration ROI performed on	10-12-2018 09:37:21 PDT
Calibration ROX is expired	Yes
Calibration ROX performed on	10-23-2018 10:07:21 PDT
Calibration SYBR is expired	Yes
Calibration SYBR performed on	10-23-2018 09:57:53 PDT
Calibration TAMRA is expired	Yes
Calibration TAMRA performed on	10-23-2018 10:45:25 PDT
Calibration Uniformity is expired	Yes
Calibration Uniformity performed on	10-12-2018 10:06:59 PDT
Calibration VIC is expired	Yes
Calibration VIC performed on	10-23-2018 10:54:25 PDT
Chemistry	SYBR_GREEN
Date Created	09-13-2021 23:08:58 PDT
Experiment File Name	D:\NZZ\2021-09-13 213756.eds
Experiment Name	2021-09-13 213756
Experiment Run End Time	09-13-2021 16:11:59 PDT
Experiment Type	Comparative Cт (ΔΔCт)
Instrument Name	285880860
Instrument Serial Number	285880860
Instrument Type	QuantStudio 12K Flex
Passive Reference	ROX
Quantification Cycle Method	Ct
Signal Smoothing On	true
Stage/ Cycle where Analysis is performed	Stage 2, Step 2
Well	Cycle	Target Name	Rn	Delta Rn
1	1
1	2
1	3
1	4
1	5
1	6
1	7
1	8
1	9
1	10
1	11
1	12
1	13
1	14
1	15
1	16
1	17
1	18
1	19
1	20
1	21
1	22
1	23
1	24
1	25
1	26
1	27
1	28
1	29
1	30
1	31
1	32
1	33
1	34
1	35
1	36
1	37
1	38
1	39
1	40
2	1
2	2
2	3
2	4
2	5
2	6
2	7
2	8
2	9
2	10
2	11
2	12
2	13
2	14
2	15
2	16
2	17
2	18
2	19
2	20
2	21
2	22
2	23
2	24
2	25
2	26
2	27
2	28
2	29
2	30
2	31
2	32
2	33
2	34
2	35
2	36
2	37
2	38
2	39
2	40
3	1
3	2
3	3
3	4
3	5
3	6
3	7
3	8
3	9
3	10
3	11
3	12
3	13
3	14
3	15
3	16
3	17
3	18
3	19
3	20
3	21
3	22
3	23
3	24
3	25
3	26
3	27
3	28
3	29
3	30
3	31
3	32
3	33
3	34
3	35
3	36
3	37
3	38
3	39
3	40
4	1
4	2
4	3
4	4
4	5
4	6
4	7
4	8
4	9
4	10
4	11
4	12
4	13
4	14
4	15
4	16
4	17
4	18
4	19
4	20
4	21
4	22
4	23
4	24
4	25
4	26
4	27
4	28
4	29
4	30
4	31
4	32
4	33
4	34
4	35
4	36
4	37
4	38
4	39
4	40
5	1
5	2
5	3
5	4
5	5
5	6
5	7
5	8
5	9
5	10
5	11
5	12
5	13
5	14
5	15
5	16
5	17
5	18
5	19
5	20
5	21
5	22
5	23
5	24
5	25
5	26
5	27
5	28
5	29
5	30
5	31
5	32
5	33
5	34
5	35
5	36
5	37
5	38
5	39
5	40
6	1
6	2
6	3
6	4
6	5
6	6
6	7
6	8
6	9
6	10
6	11
6	12
6	13
6	14
6	15
6	16
6	17
6	18
6	19
6	20
6	21
6	22
6	23
6	24
6	25
6	26
6	27
6	28
6	29
6	30
6	31
6	32
6	33
6	34
6	35
6	36
6	37
6	38
6	39
6	40
7	1
7	2
7	3
7	4
7	5
7	6
7	7
7	8
7	9
7	10
7	11
7	12
7	13
7	14
7	15
7	16
7	17
7	18
7	19
7	20
7	21
7	22
7	23
7	24
7	25
7	26
7	27
7	28
7	29
7	30
7	31
7	32
7	33
7	34
7	35
7	36
7	37
7	38
7	39
7	40
8	1
8	2
8	3
8	4
8	5
8	6
8	7
8	8
8	9
8	10
8	11
8	12
8	13
8	14
8	15
8	16
8	17
8	18
8	19
8	20
8	21
8	22
8	23
8	24
8	25
8	26
8	27
8	28
8	29
8	30
8	31
8	32
8	33
8	34
8	35
8	36
8	37
8	38
8	39
8	40
9	1
9	2
9	3
9	4
9	5
9	6
9	7
9	8
9	9
9	10
9	11
9	12
9	13
9	14
9	15
9	16
9	17
9	18
9	19
9	20
9	21
9	22
9	23
9	24
9	25
9	26
9	27
9	28
9	29
9	30
9	31
9	32
9	33
9	34
9	35
9	36
9	37
9	38
9	39
9	40
10	1
10	2
10	3
10	4
10	5
10	6
10	7
10	8
10	9
10	10
10	11
10	12
10	13
10	14
10	15
10	16
10	17
10	18
10	19
10	20
10	21
10	22
10	23
10	24
10	25
10	26
10	27
10	28
10	29
10	30
10	31
10	32
10	33
10	34
10	35
10	36
10	37
10	38
10	39
10	40
11	1
11	2
11	3
11	4
11	5
11	6
11	7
11	8
11	9
11	10
11	11
11	12
11	13
11	14
11	15
11	16
11	17
11	18
11	19
11	20
11	21
11	22
11	23
11	24
11	25
11	26
11	27
11	28
11	29
11	30
11	31
11	32
11	33
11	34
11	35
11	36
11	37
11	38
11	39
11	40
12	1
12	2
12	3
12	4
12	5
12	6
12	7
12	8
12	9
12	10
12	11
12	12
12	13
12	14
12	15
12	16
12	17
12	18
12	19
12	20
12	21
12	22
12	23
12	24
12	25
12	26
12	27
12	28
12	29
12	30
12	31
12	32
12	33
12	34
12	35
12	36
12	37
12	38
12	39
12	40
13	1
13	2
13	3
13	4
13	5
13	6
13	7
13	8
13	9
13	10
13	11
13	12
13	13
13	14
13	15
13	16
13	17
13	18
13	19
13	20
13	21
13	22
13	23
13	24
13	25
13	26
13	27
13	28
13	29
13	30
13	31
13	32
13	33
13	34
13	35
13	36
13	37
13	38
13	39
13	40
14	1
14	2
14	3
14	4
14	5
14	6
14	7
14	8
14	9
14	10
14	11
14	12
14	13
14	14
14	15
14	16
14	17
14	18
14	19
14	20
14	21
14	22
14	23
14	24
14	25
14	26
14	27
14	28
14	29
14	30
14	31
14	32
14	33
14	34
14	35
14	36
14	37
14	38
14	39
14	40
15	1
15	2
15	3
15	4
15	5
15	6
15	7
15	8
15	9
15	10
15	11
15	12
15	13
15	14
15	15
15	16
15	17
15	18
15	19
15	20
15	21
15	22
15	23
15	24
15	25
15	26
15	27
15	28
15	29
15	30
15	31
15	32
15	33
15	34
15	35
15	36
15	37
15	38
15	39
15	40
16	1
16	2
16	3
16	4
16	5
16	6
16	7
16	8
16	9
16	10
16	11
16	12
16	13
16	14
16	15
16	16
16	17
16	18
16	19
16	20
16	21
16	22
16	23
16	24
16	25
16	26
16	27
16	28
16	29
16	30
16	31
16	32
16	33
16	34
16	35
16	36
16	37
16	38
16	39
16	40
17	1
17	2
17	3
17	4
17	5
17	6
17	7
17	8
17	9
17	10
17	11
17	12
17	13
17	14
17	15
17	16
17	17
17	18
17	19
17	20
17	21
17	22
17	23
17	24
17	25
17	26
17	27
17	28
17	29
17	30
17	31
17	32
17	33
17	34
17	35
17	36
17	37
17	38
17	39
17	40
18	1
18	2
18	3
18	4
18	5
18	6
18	7
18	8
18	9
18	10
18	11
18	12
18	13
18	14
18	15
18	16
18	17
18	18
18	19
18	20
18	21
18	22
18	23
18	24
18	25
18	26
18	27
18	28
18	29
18	30
18	31
18	32
18	33
18	34
18	35
18	36
18	37
18	38
18	39
18	40
19	1
19	2
19	3
19	4
19	5
19	6
19	7
19	8
19	9
19	10
19	11
19	12
19	13
19	14
19	15
19	16
19	17
19	18
19	19
19	20
19	21
19	22
19	23
19	24
19	25
19	26
19	27
19	28
19	29
19	30
19	31
19	32
19	33
19	34
19	35
19	36
19	37
19	38
19	39
19	40
20	1
20	2
20	3
20	4
20	5
20	6
20	7
20	8
20	9
20	10
20	11
20	12
20	13
20	14
20	15
20	16
20	17
20	18
20	19
20	20
20	21
20	22
20	23
20	24
20	25
20	26
20	27
20	28
20	29
20	30
20	31
20	32
20	33
20	34
20	35
20	36
20	37
20	38
20	39
20	40
21	1
21	2
21	3
21	4
21	5
21	6
21	7
21	8
21	9
21	10
21	11
21	12
21	13
21	14
21	15
21	16
21	17
21	18
21	19
21	20
21	21
21	22
21	23
21	24
21	25
21	26
21	27
21	28
21	29
21	30
21	31
21	32
21	33
21	34
21	35
21	36
21	37
21	38
21	39
21	40
22	1	hARG1	0.029732	-0.00145991
22	2	hARG1	0.0313068	-0.000782222
22	3	hARG1	0.0328278	-0.000158359
22	4	hARG1	0.0338793	-3.97868e-06
22	5	hARG1	0.0350793	0.000298932
22	6	hARG1	0.0362793	0.000601732
22	7	hARG1	0.0370031	0.000428447
22	8	hARG1	0.0377351	0.000263268
22	9	hARG1	0.0384945	0.000125592
22	10	hARG1	0.0393495	8.34374e-05
22	11	hARG1	0.0403269	0.000163673
22	12	hARG1	0.0412147	0.000154386
22	13	hARG1	0.0418353	-0.00012216
22	14	hARG1	0.0426357	-0.000218898
22	15	hARG1	0.0432415	-0.000510201
22	16	hARG1	0.0435591	-0.00108974
22	17	hARG1	0.0444382	-0.00110774
22	18	hARG1	0.0452202	-0.00122288
22	19	hARG1	0.0460122	-0.00132802
22	20	hARG1	0.047586	-0.000651414
22	21	hARG1	0.0500923	0.000957763
22	22	hARG1	0.0533678	0.00333615
22	23	hARG1	0.0595965	0.00866777
22	24	hARG1	0.0719601	0.0201342
22	25	hARG1	0.0949124	0.0421894
22	26	hARG1	0.138486	0.0848654
22	27	hARG1	0.220067	0.16555
22	28	hARG1	0.361633	0.306218
22	29	hARG1	0.574957	0.518646
22	30	hARG1	0.82746	0.770252
22	31	hARG1	1.04938	0.991273
22	32	hARG1	1.18606	1.12705
22	33	hARG1	1.26496	1.20506
22	34	hARG1	1.31859	1.2578
22	35	hARG1	1.35706	1.29537
22	36	hARG1	1.3866	1.324
22	37	hARG1	1.4073	1.34381
22	38	hARG1	1.41793	1.35355
22	39	hARG1	1.42872	1.36343
22	40	hARG1	1.43833	1.37215
23	1	hARG1	0.0638951	-0.00591872
23	2	hARG1	0.0659252	-0.0049681
23	3	hARG1	0.0693089	-0.0026639
23	4	hARG1	0.0715739	-0.00147842
23	5	hARG1	0.0737887	-0.000343169
23	6	hARG1	0.0761253	0.000913992
23	7	hARG1	0.0774736	0.00118278
23	8	hARG1	0.0785552	0.00118487
23	9	hARG1	0.0796554	0.00120556
23	10	hARG1	0.0804707	0.000941419
23	11	hARG1	0.0821216	0.00151278
23	12	hARG1	0.0830036	0.00131533
23	13	hARG1	0.0831998	0.000431962
23	14	hARG1	0.0837077	-0.000139585
23	15	hARG1	0.0850058	7.90099e-05
23	16	hARG1	0.0852411	-0.000765183
23	17	hARG1	0.0856571	-0.00142874
23	18	hARG1	0.0865576	-0.00160767
23	19	hARG1	0.0874313	-0.00181347
23	20	hARG1	0.0890891	-0.00123523
23	21	hARG1	0.0914987	9.48704e-05
23	22	hARG1	0.0950961	0.00261279
23	23	hARG1	0.102679	0.00911632
23	24	hARG1	0.117045	0.0224023
23	25	hARG1	0.143674	0.0479521
23	26	hARG1	0.194637	0.0978362
23	27	hARG1	0.287423	0.189543
23	28	hARG1	0.443495	0.344535
23	29	hARG1	0.665261	0.565222
23	30	hARG1	0.908206	0.807087
23	31	hARG1	1.10055	0.998356
23	32	hARG1	1.2162	1.11293
23	33	hARG1	1.28495	1.18059
23	34	hARG1	1.33266	1.22723
23	35	hARG1	1.36948	1.26296
23	36	hARG1	1.39261	1.28501
23	37	hARG1	1.40826	1.29959
23	38	hARG1	1.42079	1.31104
23	39	hARG1	1.43171	1.32087
23	40	hARG1	1.44174	1.32982
24	1	hARG1	-0.0062293	-0.00128751
24	2	hARG1	-0.00541313	-0.000931344
24	3	hARG1	-0.00394447	7.73115e-05
24	4	hARG1	-0.00272139	0.000840387
24	5	hARG1	-0.00246725	0.00063452
24	6	hARG1	-0.00202717	0.000614591
24	7	hARG1	-0.00199623	0.000185523
24	8	hARG1	-0.00158839	0.000133361
24	9	hARG1	-0.0011437	0.000118046
24	10	hARG1	-0.000973457	-0.00017172
24	11	hARG1	-0.00032726	1.44712e-05
24	12	hARG1	-0.000104793	-0.000223068
24	13	hARG1	-0.000117335	-0.000695616
24	14	hARG1	0.000353661	-0.000684626
24	15	hARG1	0.000877673	-0.00062062
24	16	hARG1	0.00076579	-0.00119251
24	17	hARG1	0.000773102	-0.0016452
24	18	hARG1	0.00174988	-0.00112843
24	19	hARG1	0.00227615	-0.00106217
24	20	hARG1	0.00318713	-0.000611189
24	21	hARG1	0.00537538	0.00111705
24	22	hARG1	0.00901823	0.00429989
24	23	hARG1	0.0155106	0.0103323
24	24	hARG1	0.0286025	0.0229642
24	25	hARG1	0.0542134	0.048115
24	26	hARG1	0.102148	0.0955897
24	27	hARG1	0.190078	0.183059
24	28	hARG1	0.341372	0.333894
24	29	hARG1	0.563281	0.555343
24	30	hARG1	0.815516	0.807118
24	31	hARG1	1.0279	1.01904
24	32	hARG1	1.15724	1.14792
24	33	hARG1	1.23001	1.22023
24	34	hARG1	1.27777	1.26753
24	35	hARG1	1.31712	1.30643
24	36	hARG1	1.34366	1.3325
24	37	hARG1	1.36549	1.35387
24	38	hARG1	1.37801	1.36594
24	39	hARG1	1.39077	1.37824
24	40	hARG1	1.39546	1.38246
25	1
25	2
25	3
25	4
25	5
25	6
25	7
25	8
25	9
25	10
25	11
25	12
25	13
25	14
25	15
25	16
25	17
25	18
25	19
25	20
25	21
25	22
25	23
25	24
25	25
25	26
25	27
25	28
25	29
25	30
25	31
25	32
25	33
25	34
25	35
25	36
25	37
25	38
25	39
25	40
26	1
26	2
26	3
26	4
26	5
26	6
26	7
26	8
26	9
26	10
26	11
26	12
26	13
26	14
26	15
26	16
26	17
26	18
26	19
26	20
26	21
26	22
26	23
26	24
26	25
26	26
26	27
26	28
26	29
26	30
26	31
26	32
26	33
26	34
26	35
26	36
26	37
26	38
26	39
26	40
27	1
27	2
27	3
27	4
27	5
27	6
27	7
27	8
27	9
27	10
27	11
27	12
27	13
27	14
27	15
27	16
27	17
27	18
27	19
27	20
27	21
27	22
27	23
27	24
27	25
27	26
27	27
27	28
27	29
27	30
27	31
27	32
27	33
27	34
27	35
27	36
27	37
27	38
27	39
27	40
28	1
28	2
28	3
28	4
28	5
28	6
28	7
28	8
28	9
28	10
28	11
28	12
28	13
28	14
28	15
28	16
28	17
28	18
28	19
28	20
28	21
28	22
28	23
28	24
28	25
28	26
28	27
28	28
28	29
28	30
28	31
28	32
28	33
28	34
28	35
28	36
28	37
28	38
28	39
28	40
29	1
29	2
29	3
29	4
29	5
29	6
29	7
29	8
29	9
29	10
29	11
29	12
29	13
29	14
29	15
29	16
29	17
29	18
29	19
29	20
29	21
29	22
29	23
29	24
29	25
29	26
29	27
29	28
29	29
29	30
29	31
29	32
29	33
29	34
29	35
29	36
29	37
29	38
29	39
29	40
30	1
30	2
30	3
30	4
30	5
30	6
30	7
30	8
30	9
30	10
30	11
30	12
30	13
30	14
30	15
30	16
30	17
30	18
30	19
30	20
30	21
30	22
30	23
30	24
30	25
30	26
30	27
30	28
30	29
30	30
30	31
30	32
30	33
30	34
30	35
30	36
30	37
30	38
30	39
30	40
31	1
31	2
31	3
31	4
31	5
31	6
31	7
31	8
31	9
31	10
31	11
31	12
31	13
31	14
31	15
31	16
31	17
31	18
31	19
31	20
31	21
31	22
31	23
31	24
31	25
31	26
31	27
31	28
31	29
31	30
31	31
31	32
31	33
31	34
31	35
31	36
31	37
31	38
31	39
31	40
32	1
32	2
32	3
32	4
32	5
32	6
32	7
32	8
32	9
32	10
32	11
32	12
32	13
32	14
32	15
32	16
32	17
32	18
32	19
32	20
32	21
32	22
32	23
32	24
32	25
32	26
32	27
32	28
32	29
32	30
32	31
32	32
32	33
32	34
32	35
32	36
32	37
32	38
32	39
32	40
33	1
33	2
33	3
33	4
33	5
33	6
33	7
33	8
33	9
33	10
33	11
33	12
33	13
33	14
33	15
33	16
33	17
33	18
33	19
33	20
33	21
33	22
33	23
33	24
33	25
33	26
33	27
33	28
33	29
33	30
33	31
33	32
33	33
33	34
33	35
33	36
33	37
33	38
33	39
33	40
34	1
34	2
34	3
34	4
34	5
34	6
34	7
34	8
34	9
34	10
34	11
34	12
34	13
34	14
34	15
34	16
34	17
34	18
34	19
34	20
34	21
34	22
34	23
34	24
34	25
34	26
34	27
34	28
34	29
34	30
34	31
34	32
34	33
34	34
34	35
34	36
34	37
34	38
34	39
34	40
35	1
35	2
35	3
35	4
35	5
35	6
35	7
35	8
35	9
35	10
35	11
35	12
35	13
35	14
35	15
35	16
35	17
35	18
35	19
35	20
35	21
35	22
35	23
35	24
35	25
35	26
35	27
35	28
35	29
35	30
35	31
35	32
35	33
35	34
35	35
35	36
35	37
35	38
35	39
35	40
36	1
36	2
36	3
36	4
36	5
36	6
36	7
36	8
36	9
36	10
36	11
36	12
36	13
36	14
36	15
36	16
36	17
36	18
36	19
36	20
36	21
36	22
36	23
36	24
36	25
36	26
36	27
36	28
36	29
36	30
36	31
36	32
36	33
36	34
36	35
36	36
36	37
36	38
36	39
36	40
37	1
37	2
37	3
37	4
37	5
37	6
37	7
37	8
37	9
37	10
37	11
37	12
37	13
37	14
37	15
37	16
37	17
37	18
37	19
37	20
37	21
37	22
37	23
37	24
37	25
37	26
37	27
37	28
37	29
37	30
37	31
37	32
37	33
37	34
37	35
37	36
37	37
37	38
37	39
37	40
38	1
38	2
38	3
38	4
38	5
38	6
38	7
38	8
38	9
38	10
38	11
38	12
38	13
38	14
38	15
38	16
38	17
38	18
38	19
38	20
38	21
38	22
38	23
38	24
38	25
38	26
38	27
38	28
38	29
38	30
38	31
38	32
38	33
38	34
38	35
38	36
38	37
38	38
38	39
38	40
39	1
39	2
39	3
39	4
39	5
39	6
39	7
39	8
39	9
39	10
39	11
39	12
39	13
39	14
39	15
39	16
39	17
39	18
39	19
39	20
39	21
39	22
39	23
39	24
39	25
39	26
39	27
39	28
39	29
39	30
39	31
39	32
39	33
39	34
39	35
39	36
39	37
39	38
39	39
39	40
40	1
40	2
40	3
40	4
40	5
40	6
40	7
40	8
40	9
40	10
40	11
40	12
40	13
40	14
40	15
40	16
40	17
40	18
40	19
40	20
40	21
40	22
40	23
40	24
40	25
40	26
40	27
40	28
40	29
40	30
40	31
40	32
40	33
40	34
40	35
40	36
40	37
40	38
40	39
40	40
41	1
41	2
41	3
41	4
41	5
41	6
41	7
41	8
41	9
41	10
41	11
41	12
41	13
41	14
41	15
41	16
41	17
41	18
41	19
41	20
41	21
41	22
41	23
41	24
41	25
41	26
41	27
41	28
41	29
41	30
41	31
41	32
41	33
41	34
41	35
41	36
41	37
41	38
41	39
41	40
42	1
42	2
42	3
42	4
42	5
42	6
42	7
42	8
42	9
42	10
42	11
42	12
42	13
42	14
42	15
42	16
42	17
42	18
42	19
42	20
42	21
42	22
42	23
42	24
42	25
42	26
42	27
42	28
42	29
42	30
42	31
42	32
42	33
42	34
42	35
42	36
42	37
42	38
42	39
42	40
43	1
43	2
43	3
43	4
43	5
43	6
43	7
43	8
43	9
43	10
43	11
43	12
43	13
43	14
43	15
43	16
43	17
43	18
43	19
43	20
43	21
43	22
43	23
43	24
43	25
43	26
43	27
43	28
43	29
43	30
43	31
43	32
43	33
43	34
43	35
43	36
43	37
43	38
43	39
43	40
44	1
44	2
44	3
44	4
44	5
44	6
44	7
44	8
44	9
44	10
44	11
44	12
44	13
44	14
44	15
44	16
44	17
44	18
44	19
44	20
44	21
44	22
44	23
44	24
44	25
44	26
44	27
44	28
44	29
44	30
44	31
44	32
44	33
44	34
44	35
44	36
44	37
44	38
44	39
44	40
45	1
45	2
45	3
45	4
45	5
45	6
45	7
45	8
45	9
45	10
45	11
45	12
45	13
45	14
45	15
45	16
45	17
45	18
45	19
45	20
45	21
45	22
45	23
45	24
45	25
45	26
45	27
45	28
45	29
45	30
45	31
45	32
45	33
45	34
45	35
45	36
45	37
45	38
45	39
45	40
46	1	hARG1	0.206197	0.00101657
46	2	hARG1	0.206995	0.000315184
46	3	hARG1	0.207751	-0.000428687
46	4	hARG1	0.209201	-0.000478075
46	5	hARG1	0.211443	0.000264326
46	6	hARG1	0.212867	0.000189219
46	7	hARG1	0.214074	-0.000103147
46	8	hARG1	0.21515	-0.000527179
46	9	hARG1	0.21755	0.000373263
46	10	hARG1	0.219109	0.000432624
46	11	hARG1	0.221039	0.000863367
46	12	hARG1	0.222411	0.000736092
46	13	hARG1	0.223897	0.000721767
46	14	hARG1	0.225073	0.000398809
46	15	hARG1	0.226547	0.000372593
46	16	hARG1	0.227207	-0.000466944
46	17	hARG1	0.227879	-0.00129368
46	18	hARG1	0.22911	-0.00156292
46	19	hARG1	0.230895	-0.00127684
46	20	hARG1	0.232695	-0.00097642
46	21	hARG1	0.235437	0.000265766
46	22	hARG1	0.239167	0.00249606
46	23	hARG1	0.247015	0.00884412
46	24	hARG1	0.261141	0.0214714
46	25	hARG1	0.287072	0.0459022
46	26	hARG1	0.336254	0.0935845
46	27	hARG1	0.426806	0.182638
46	28	hARG1	0.577417	0.331749
46	29	hARG1	0.795793	0.548625
46	30	hARG1	1.0376	0.78893
46	31	hARG1	1.23278	0.982618
46	32	hARG1	1.35068	1.09902
46	33	hARG1	1.42571	1.17255
46	34	hARG1	1.47636	1.22169
46	35	hARG1	1.5088	1.25263
46	36	hARG1	1.5351	1.27743
46	37	hARG1	1.55366	1.29449
46	38	hARG1	1.56599	1.30533
46	39	hARG1	1.58032	1.31815
46	40	hARG1	1.58766	1.324
47	1	hARG1	0.0695877	-0.00259673
47	2	hARG1	0.0709849	-0.00210876
47	3	hARG1	0.0729916	-0.00101136
47	4	hARG1	0.0745585	-0.000353713
47	5	hARG1	0.0756571	-0.000164405
47	6	hARG1	0.0771051	0.000374297
47	7	hARG1	0.0785078	0.000867701
47	8	hARG1	0.0792464	0.000697004
47	9	hARG1	0.0799897	0.000531046
47	10	hARG1	0.0809034	0.000535475
47	11	hARG1	0.081593	0.000315776
47	12	hARG1	0.0822491	6.26084e-05
47	13	hARG1	0.0830538	-4.19347e-05
47	14	hARG1	0.0836956	-0.000309489
47	15	hARG1	0.084331	-0.000583361
47	16	hARG1	0.085066	-0.000757582
47	17	hARG1	0.0856895	-0.00104337
47	18	hARG1	0.0871979	-0.000444264
47	19	hARG1	0.0881964	-0.000355106
47	20	hARG1	0.0895079	4.71614e-05
47	21	hARG1	0.0920035	0.00163351
47	22	hARG1	0.0965716	0.00529232
47	23	hARG1	0.104832	0.0126438
47	24	hARG1	0.120568	0.0274698
47	25	hARG1	0.1499	0.0558927
47	26	hARG1	0.205139	0.110222
47	27	hARG1	0.306808	0.210982
47	28	hARG1	0.474194	0.377459
47	29	hARG1	0.70207	0.604425
47	30	hARG1	0.938325	0.839772
47	31	hARG1	1.11803	1.01857
47	32	hARG1	1.22392	1.12355
47	33	hARG1	1.2903	1.18902
47	34	hARG1	1.3371	1.23491
47	35	hARG1	1.36979	1.26669
47	36	hARG1	1.39163	1.28762
47	37	hARG1	1.40858	1.30366
47	38	hARG1	1.42299	1.31716
47	39	hARG1	1.43295	1.32621
47	40	hARG1	1.44087	1.33323
48	1	hARG1	0.0228133	-0.00176868
48	2	hARG1	0.02399	-0.00126708
48	3	hARG1	0.0256763	-0.000255899
48	4	hARG1	0.0267276	0.000120329
48	5	hARG1	0.0275167	0.000234341
48	6	hARG1	0.0284133	0.000455843
48	7	hARG1	0.028998	0.000365463
48	8	hARG1	0.0296649	0.000357286
48	9	hARG1	0.0302257	0.000243061
48	10	hARG1	0.0309547	0.000296912
48	11	hARG1	0.0312999	-3.2933e-05
48	12	hARG1	0.0319211	-8.68196e-05
48	13	hARG1	0.0324332	-0.000249846
48	14	hARG1	0.0328928	-0.000465269
48	15	hARG1	0.0333308	-0.000702402
48	16	hARG1	0.0334225	-0.00128579
48	17	hARG1	0.034548	-0.000835407
48	18	hARG1	0.0352217	-0.00083677
48	19	hARG1	0.035909	-0.000824529
48	20	hARG1	0.0379489	0.000540231
48	21	hARG1	0.0410459	0.0029622
48	22	hARG1	0.0451744	0.00641558
48	23	hARG1	0.0542677	0.0148338
48	24	hARG1	0.0714528	0.0313439
48	25	hARG1	0.104859	0.0640745
48	26	hARG1	0.167193	0.125734
48	27	hARG1	0.28014	0.238006
48	28	hARG1	0.461234	0.418425
48	29	hARG1	0.698287	0.654803
48	30	hARG1	0.930385	0.886226
48	31	hARG1	1.09721	1.05238
48	32	hARG1	1.19456	1.14905
48	33	hARG1	1.26044	1.21425
48	34	hARG1	1.30511	1.25825
48	35	hARG1	1.33069	1.28315
48	36	hARG1	1.35372	1.30551
48	37	hARG1	1.37482	1.32594
48	38	hARG1	1.38511	1.33555
48	39	hARG1	1.39478	1.34455
48	40	hARG1	1.40448	1.35357
49	1
49	2
49	3
49	4
49	5
49	6
49	7
49	8
49	9
49	10
49	11
49	12
49	13
49	14
49	15
49	16
49	17
49	18
49	19
49	20
49	21
49	22
49	23
49	24
49	25
49	26
49	27
49	28
49	29
49	30
49	31
49	32
49	33
49	34
49	35
49	36
49	37
49	38
49	39
49	40
50	1
50	2
50	3
50	4
50	5
[truncated: 13,395 more rows]

## Sheet: Results
Block Type	384-Well Block
Calibration Background is expired	Yes
Calibration Background performed on	10-12-2018 11:47:46 PDT
Calibration FAM is expired	Yes
Calibration FAM performed on	10-23-2018 10:23:19 PDT
Calibration MELTDOCTOR is expired	Yes
Calibration MELTDOCTOR performed on	09-26-2017 21:22:46 PDT
Calibration NED is expired	Yes
Calibration NED performed on	10-23-2018 10:33:14 PDT
Calibration ROI is expired	Yes
Calibration ROI performed on	10-12-2018 09:37:21 PDT
Calibration ROX is expired	Yes
Calibration ROX performed on	10-23-2018 10:07:21 PDT
Calibration SYBR is expired	Yes
Calibration SYBR performed on	10-23-2018 09:57:53 PDT
Calibration TAMRA is expired	Yes
Calibration TAMRA performed on	10-23-2018 10:45:25 PDT
Calibration Uniformity is expired	Yes
Calibration Uniformity performed on	10-12-2018 10:06:59 PDT
Calibration VIC is expired	Yes
Calibration VIC performed on	10-23-2018 10:54:25 PDT
Chemistry	SYBR_GREEN
Date Created	09-13-2021 23:08:58 PDT
Experiment File Name	D:\NZZ\2021-09-13 213756.eds
Experiment Name	2021-09-13 213756
Experiment Run End Time	09-13-2021 16:11:59 PDT
Experiment Type	Comparative Cт (ΔΔCт)
Instrument Name	285880860
Instrument Serial Number	285880860
Instrument Type	QuantStudio 12K Flex
Passive Reference	ROX
Quantification Cycle Method	Ct
Signal Smoothing On	true
Stage/ Cycle where Analysis is performed	Stage 2, Step 2
Well	Well Position	Omit	Sample Name	Target Name	Task	Reporter	Quencher	RQ	RQ Min	RQ Max	CT	Ct Mean	Ct SE	Quantity	Delta Ct Mean	Delta Ct SE	Delta Delta Ct	Automatic Ct Threshold	Ct Threshold	Automatic Baseline	Baseline Start	Baseline End	Efficiency	Comments	Amp Score	Cq Conf	Tm1	Tm2	Tm3
22	A22	false	HepG2	hARG1	UNKNOWN	SYBR	None	4.12843	3.49003	4.88361	26.594	26.4651	0.0664944		9.94355	0.0872892	-2.04559	true	0.127302	true	3	22			1.30756	0.9689	80.7945
23	A23	false	HepG2	hARG1	UNKNOWN	SYBR	None	4.12843	3.49003	4.88361	26.374	26.4651	0.0664944		9.94355	0.0872892	-2.04559	true	0.127302	true	3	22			1.29349	0.954318	80.7945
24	A24	false	HepG2	hARG1	UNKNOWN	SYBR	None	4.12843	3.49003	4.88361	26.427	26.4651	0.0664944		9.94355	0.0872892	-2.04559	true	0.127302	true	3	22			1.30529	0.980016	80.7945
46	B22	false	HepG2 2.15	hARG1	UNKNOWN	SYBR	None	3.10123	2.40085	4.00591	26.438	26.2031	0.131336		10.3563	0.133009	-1.63284	true	0.127302	true	3	22			1.29365	0.95796	80.7945
47	B23	false	HepG2 2.15	hARG1	UNKNOWN	SYBR	None	3.10123	2.40085	4.00591	26.187	26.2031	0.131336		10.3563	0.133009	-1.63284	true	0.127302	true	3	21			1.30406	0.96315	80.7945
48	B24	false	HepG2 2.15	hARG1	UNKNOWN	SYBR	None	3.10123	2.40085	4.00591	25.984	26.2031	0.131336		10.3563	0.133009	-1.63284	true	0.127302	true	3	21			1.30562	0.974714	80.7945
70	C22	false	VEC-7721	hARG1	UNKNOWN	SYBR	None	1	0.787159	1.27039	27.051	27.2127	0.109707		11.9891	0.124358	0	true	0.127302	true	3	22			1.31825	0.949994	80.9235
71	C23	false	VEC-7721	hARG1	UNKNOWN	SYBR	None	1	0.787159	1.27039	27.422	27.2127	0.109707		11.9891	0.124358	0	true	0.127302	true	3	23			1.30068	0.962611	80.9235
72	C24	false	VEC-7721	hARG1	UNKNOWN	SYBR	None	1	0.787159	1.27039	27.165	27.2127	0.109707		11.9891	0.124358	0	true	0.127302	true	3	22			1.31177	0.971764	80.9235
94	D22	false	HBx-7721	hARG1	UNKNOWN	SYBR	None	1.18608	1.10364	1.27469	26.875	26.9202	0.0228212		11.7429	0.0374357	-0.246203	true	0.127302	true	3	22			1.30989	0.956632	80.9235
95	D23	false	HBx-7721	hARG1	UNKNOWN	SYBR	None	1.18608	1.10364	1.27469	26.944	26.9202	0.0228212		11.7429	0.0374357	-0.246203	true	0.127302	true	3	22			1.31707	0.97667	80.9235
96	D24	false	HBx-7721	hARG1	UNKNOWN	SYBR	None	1.18608	1.10364	1.27469	26.942	26.9202	0.0228212		11.7429	0.0374357	-0.246203	true	0.127302	true	3	22			1.31481	0.974154	80.9235
118	E22	false	HepG2	hCyclophilion	UNKNOWN	SYBR	None				16.497	16.5216	0.05655					true	0.121713	true	3	12			1.28025	0.939561	83.504
119	E23	false	HepG2	hCyclophilion	UNKNOWN	SYBR	None				16.438	16.5216	0.05655					true	0.121713	true	3	12			1.28132	0.965842	83.504
120	E24	false	HepG2	hCyclophilion	UNKNOWN	SYBR	None				16.63	16.5216	0.05655					true	0.121713	true	3	12			1.27152	0.943565	83.504
142	F22	false	HepG2 2.15	hCyclophilion	UNKNOWN	SYBR	None				15.829	15.8468	0.021028					true	0.121713	true	3	11			1.28526	0.942989	83.504
143	F23	false	HepG2 2.15	hCyclophilion	UNKNOWN	SYBR	None				15.822	15.8468	0.021028					true	0.121713	true	3	11			1.27715	0.958068	83.504
144	F24	false	HepG2 2.15	hCyclophilion	UNKNOWN	SYBR	None				15.889	15.8468	0.021028					true	0.121713	true	3	11			1.2864	0.959775	83.504
166	G22	false	VEC-7721	hCyclophilion	UNKNOWN	SYBR	None				15.123	15.2236	0.0585597					true	0.121713	true	3	11			1.28601	0.920835	83.504
167	G23	false	VEC-7721	hCyclophilion	UNKNOWN	SYBR	None				15.326	15.2236	0.0585597					true	0.121713	true	3	11			1.25563	0.943947	83.504
168	G24	false	VEC-7721	hCyclophilion	UNKNOWN	SYBR	None				15.221	15.2236	0.0585597					true	0.121713	true	3	11			1.2722	0.951177	83.6331
190	H22	false	HBx-7721	hCyclophilion	UNKNOWN	SYBR	None				15.125	15.1773	0.0296752					true	0.121713	true	3	11			1.28438	0.938714	83.504
191	H23	false	HBx-7721	hCyclophilion	UNKNOWN	SYBR	None				15.228	15.1773	0.0296752					true	0.121713	true	3	11			1.27792	0.941649	83.504
192	H24	false	HBx-7721	hCyclophilion	UNKNOWN	SYBR	None				15.179	15.1773	0.0296752					true	0.121713	true	3	11			1.28305	0.962454	83.504
Analysis Type	Singleplex
Endogenous Control	mCyclophilion
RQ Min/Max Confidence Level	95.0
Reference Sample	VEC-7721

## Sheet: Melt Curve Raw Data
Block Type	384-Well Block
Calibration Background is expired	Yes
Calibration Background performed on	10-12-2018 11:47:46 PDT
Calibration FAM is expired	Yes
Calibration FAM performed on	10-23-2018 10:23:19 PDT
Calibration MELTDOCTOR is expired	Yes
Calibration MELTDOCTOR performed on	09-26-2017 21:22:46 PDT
Calibration NED is expired	Yes
Calibration NED performed on	10-23-2018 10:33:14 PDT
Calibration ROI is expired	Yes
Calibration ROI performed on	10-12-2018 09:37:21 PDT
Calibration ROX is expired	Yes
Calibration ROX performed on	10-23-2018 10:07:21 PDT
Calibration SYBR is expired	Yes
Calibration SYBR performed on	10-23-2018 09:57:53 PDT
Calibration TAMRA is expired	Yes
Calibration TAMRA performed on	10-23-2018 10:45:25 PDT
Calibration Uniformity is expired	Yes
Calibration Uniformity performed on	10-12-2018 10:06:59 PDT
Calibration VIC is expired	Yes
Calibration VIC performed on	10-23-2018 10:54:25 PDT
Chemistry	SYBR_GREEN
Date Created	09-13-2021 23:08:58 PDT
Experiment File Name	D:\NZZ\2021-09-13 213756.eds
Experiment Name	2021-09-13 213756
Experiment Run End Time	09-13-2021 16:11:59 PDT
Experiment Type	Comparative Cт (ΔΔCт)
Instrument Name	285880860
Instrument Serial Number	285880860
Instrument Type	QuantStudio 12K Flex
Passive Reference	ROX
Quantification Cycle Method	Ct
Signal Smoothing On	true
Stage/ Cycle where Analysis is performed	Stage 2, Step 2
Well	Well Position	Reading	Temperature	Fluorescence	Derivative
22	A22	1	60.1504	1.47705	0.0633997
22	A22	2	60.4085	1.47152	0.0628953
22	A22	3	60.6665	1.46581	0.0622132
22	A22	4	60.9246	1.45703	0.0614618
22	A22	5	61.1826	1.4523	0.0607976
22	A22	6	61.4407	1.44178	0.0603929
22	A22	7	61.6987	1.43701	0.0604042
22	A22	8	61.9568	1.42974	0.0609404
22	A22	9	62.2148	1.41984	0.062029
22	A22	10	62.4729	1.41514	0.0635624
22	A22	11	62.7309	1.40856	0.0652855
22	A22	12	62.989	1.3987	0.0668543
22	A22	13	63.247	1.39096	0.0679703
22	A22	14	63.5051	1.37808	0.068517
22	A22	15	63.7631	1.3679	0.0686061
22	A22	16	64.0212	1.36395	0.0684823
22	A22	17	64.2792	1.35588	0.0683597
22	A22	18	64.5373	1.34831	0.0683138
22	A22	19	64.7953	1.33865	0.0682971
22	A22	20	65.0534	1.32782	0.0682441
22	A22	21	65.3114	1.31797	0.0681458
22	A22	22	65.5695	1.31318	0.0680272
22	A22	23	65.8275	1.30707	0.0678759
22	A22	24	66.0856	1.29473	0.0676159
22	A22	25	66.3436	1.28929	0.0671846
22	A22	26	66.6017	1.27436	0.066646
22	A22	27	66.8597	1.26912	0.0662224
22	A22	28	67.1178	1.26269	0.0661918
22	A22	29	67.3758	1.2555	0.0667052
22	A22	30	67.6339	1.24979	0.06767
22	A22	31	67.8919	1.23759	0.0687846
22	A22	32	68.15	1.23096	0.0697136
22	A22	33	68.408	1.21775	0.0702701
22	A22	34	68.6661	1.20936	0.0704894
22	A22	35	68.9241	1.20277	0.0705426
22	A22	36	69.1822	1.19455	0.0705788
22	A22	37	69.4402	1.18665	0.0705983
22	A22	38	69.6983	1.1775	0.0704585
22	A22	39	69.9563	1.16539	0.0699759
22	A22	40	70.2144	1.158	0.0690632
22	A22	41	70.4725	1.14823	0.0678024
22	A22	42	70.7305	1.14263	0.0664336
22	A22	43	70.9886	1.1316	0.0652765
22	A22	44	71.2466	1.12453	0.0646182
22	A22	45	71.5047	1.11825	0.0646092
22	A22	46	71.7627	1.11202	0.0652036
22	A22	47	72.0208	1.10492	0.0661733
22	A22	48	72.2788	1.09097	0.0672039
22	A22	49	72.5369	1.08619	0.0680222
22	A22	50	72.7949	1.07716	0.0684923
22	A22	51	73.053	1.06485	0.0686393
22	A22	52	73.311	1.05914	0.0685855
22	A22	53	73.5691	1.05145	0.0684576
22	A22	54	73.8271	1.04224	0.0683194
22	A22	55	74.0852	1.03334	0.0681568
22	A22	56	74.3432	1.02584	0.0679145
22	A22	57	74.6013	1.0148	0.0675482
22	A22	58	74.8593	1.00669	0.0670477
22	A22	59	75.1174	1.00273	0.066453
22	A22	60	75.3754	0.989862	0.0658628
22	A22	61	75.6335	0.982136	0.0654619
22	A22	62	75.8915	0.974743	0.0655493
22	A22	63	76.1496	0.967244	0.0665556
22	A22	64	76.4076	0.960305	0.0690562
22	A22	65	76.6657	0.953747	0.0738102
22	A22	66	76.9237	0.943768	0.081788
22	A22	67	77.1818	0.933859	0.0940961
22	A22	68	77.4398	0.925161	0.111685
22	A22	69	77.6979	0.916082	0.134856
22	A22	70	77.9559	0.904025	0.162828
22	A22	71	78.214	0.889334	0.19378
22	A22	72	78.472	0.859589	0.225652
22	A22	73	78.7301	0.815278	0.257496
22	A22	74	78.9881	0.764246	0.290589
22	A22	75	79.2462	0.728542	0.328297
22	A22	76	79.5042	0.703289	0.374257
22	A22	77	79.7623	0.6826	0.429467
22	A22	78	80.0203	0.644592	0.489848
22	A22	79	80.2784	0.577444	0.545896
22	A22	80	80.5365	0.470359	0.585058
22	A22	81	80.7945	0.348408	0.595992
22	A22	82	81.0526	0.235412	0.572767
22	A22	83	81.3106	0.144356	0.5171
22	A22	84	81.5687	0.0785259	0.437737
22	A22	85	81.8267	0.0437513	0.347458
22	A22	86	82.0848	0.0310956	0.259155
22	A22	87	82.3428	0.0260351	0.182572
22	A22	88	82.6009	0.0233944	0.12272
22	A22	89	82.8589	0.0200934	0.0800898
22	A22	90	83.117	0.016812	0.0520824
22	A22	91	83.375	0.0136901	0.0347916
22	A22	92	83.6331	0.0110325	0.0244363
22	A22	93	83.8911	0.00877112	0.0181275
22	A22	94	84.1492	0.00794622	0.0140211
22	A22	95	84.4072	0.00696381	0.011109
22	A22	96	84.6653	0.00631169	0.00890667
22	A22	97	84.9233	0.00471485	0.00719951
22	A22	98	85.1814	0.00446618	0.00589147
22	A22	99	85.4394	0.00391283	0.00493185
22	A22	100	85.6975	0.00412466	0.00428009
22	A22	101	85.9555	0.00358448	0.00388718
22	A22	102	86.2136	0.00281125	0.00369005
22	A22	103	86.4716	0.00296249	0.00361897
22	A22	104	86.7297	0.00174679	0.00361128
22	A22	105	86.9877	0.00146228	0.00362093
22	A22	106	87.2458	0.00094452	0.00361815
22	A22	107	87.5038	0.00046818	0.0035828
22	A22	108	87.7619	0.000253845	0.00350015
22	A22	109	88.0199	-0.000666283	0.00336447
22	A22	110	88.278	-0.00102605	0.00318753
22	A22	111	88.536	-0.00133994	0.00300175
22	A22	112	88.7941	-0.00134431	0.00285068
22	A22	113	89.0521	-0.00159669	0.00276867
22	A22	114	89.3102	-0.00193666	0.0027618
22	A22	115	89.5683	-0.00237304	0.00280254
22	A22	116	89.8263	-0.00286043	0.00284253
22	A22	117	90.0844	-0.00310961	0.00283613
22	A22	118	90.3424	-0.00401491	0.00276136
22	A22	119	90.6004	-0.00397079	0.00262684
22	A22	120	90.8585	-0.00414584	0.00246244
22	A22	121	91.1166	-0.00426805	0.00230116
22	A22	122	91.3746	-0.004882	0.00216428
22	A22	123	91.6327	-0.00472412	0.00205755
22	A22	124	91.8907	-0.00568042	0.00197682
22	A22	125	92.1488	-0.00509516	0.00191579
22	A22	126	92.4068	-0.0054461	0.00186956
22	A22	127	92.6649	-0.00625515	0.00183413
22	A22	128	92.9229	-0.00590301	0.00180435
22	A22	129	93.181	-0.00641807	0.00177266
22	A22	130	93.439	-0.00627636	0.00172805
22	A22	131	93.6971	-0.00702516	0.00165571
22	A22	132	93.9551	-0.0071128	0.00153861
22	A22	133	94.2132	-0.00681236	0.00136295
22	A22	134	94.4712	-0.00741826	0.00112652
22	A22	135	94.7293	-0.00817696	0.000845662
23	A23	1	60.1504	1.49926	0.0630211
23	A23	2	60.4085	1.49853	0.0618963
23	A23	3	60.6665	1.48542	0.0606551
23	A23	4	60.9246	1.48325	0.0596846
23	A23	5	61.1826	1.47577	0.0593736
23	A23	6	61.4407	1.47097	0.0599349
23	A23	7	61.6987	1.46774	0.0612984
23	A23	8	61.9568	1.45351	0.0631457
23	A23	9	62.2148	1.44862	0.0650526
23	A23	10	62.4729	1.44343	0.0666582
23	A23	11	62.7309	1.42753	0.0677684
23	A23	12	62.989	1.42303	0.0683586
23	A23	13	63.247	1.41516	0.068515
23	A23	14	63.5051	1.40817	0.0683678
23	A23	15	63.7631	1.39602	0.0680642
23	A23	16	64.0212	1.38979	0.067759
23	A23	17	64.2792	1.38118	0.0675994
23	A23	18	64.5373	1.37329	0.0676866
23	A23	19	64.7953	1.36844	0.0680377
23	A23	20	65.0534	1.3601	0.0685912
23	A23	21	65.3114	1.34581	0.0692572
23	A23	22	65.5695	1.34146	0.0699624
23	A23	23	65.8275	1.33375	0.0706561
23	A23	24	66.0856	1.32667	0.0712706
23	A23	25	66.3436	1.31159	0.0716935
23	A23	26	66.6017	1.3083	0.0717908
23	A23	27	66.8597	1.30195	0.0714864
23	A23	28	67.1178	1.28496	0.0708507
23	A23	29	67.3758	1.27781	0.0701174
23	A23	30	67.6339	1.27266	0.0695936
23	A23	31	67.8919	1.26401	0.0694954
23	A23	32	68.15	1.26058	0.069834
23	A23	33	68.408	1.24735	0.0704317
23	A23	34	68.6661	1.23891	0.0710591
23	A23	35	68.9241	1.22835	0.0715707
23	A23	36	69.1822	1.22038	0.071937
23	A23	37	69.4402	1.2151	0.0721712
23	A23	38	69.6983	1.20651	0.0722425
23	A23	39	69.9563	1.19451	0.0720822
23	A23	40	70.2144	1.18605	0.0716644
23	A23	41	70.4725	1.17608	0.0710821
23	A23	42	70.7305	1.16792	0.0705341
23	A23	43	70.9886	1.16363	0.0702201
23	A23	44	71.2466	1.15348	0.0702266
23	A23	45	71.5047	1.1438	0.0704847
23	A23	46	71.7627	1.13714	0.0708231
23	A23	47	72.0208	1.12834	0.0710696
23	A23	48	72.2788	1.11674	0.0711453
23	A23	49	72.5369	1.10959	0.0710835
23	A23	50	72.7949	1.10124	0.0709884
23	A23	51	73.053	1.09356	0.0709525
23	A23	52	73.311	1.08503	0.0709925
23	A23	53	73.5691	1.07497	0.0710358
23	A23	54	73.8271	1.06855	0.0709624
23	A23	55	74.0852	1.05857	0.0706711
23	A23	56	74.3432	1.04742	0.0701363
23	A23	57	74.6013	1.04223	0.0694224
23	A23	58	74.8593	1.03305	0.0686699
23	A23	59	75.1174	1.02451	0.068057
23	A23	60	75.3754	1.01563	0.0677633
23	A23	61	75.6335	1.00959	0.0679486
23	A23	62	75.8915	1.00071	0.0687759
23	A23	63	76.1496	0.994637	0.0705009
23	A23	64	76.4076	0.984994	0.0736292
23	A23	65	76.6657	0.974438	0.0790615
23	A23	66	76.9237	0.966049	0.0880957
23	A23	67	77.1818	0.95924	0.10216
23	A23	68	77.4398	0.953452	0.122269
23	A23	69	77.6979	0.940047	0.148387
23	A23	70	77.9559	0.924218	0.179062
23	A23	71	78.214	0.912269	0.21172
23	A23	72	78.472	0.873866	0.243798
23	A23	73	78.7301	0.826841	0.27431
23	A23	74	78.9881	0.775738	0.304969
23	A23	75	79.2462	0.740965	0.339871
23	A23	76	79.5042	0.719202	0.383365
23	A23	77	79.7623	0.696501	0.436893
23	A23	78	80.0203	0.661499	0.496447
23	A23	79	80.2784	0.593716	0.552277
23	A23	80	80.5365	0.489611	0.591442
23	A23	81	80.7945	0.370894	0.602231
23	A23	82	81.0526	0.259976	0.578494
23	A23	83	81.3106	0.168762	0.521924
23	A23	84	81.5687	0.105578	0.441415
23	A23	85	81.8267	0.0728189	0.349973
23	A23	86	82.0848	0.0602371	0.260698
23	A23	87	82.3428	0.055564	0.183441
23	A23	88	82.6009	0.053386	0.123204
23	A23	89	82.8589	0.0496692	0.0803903
23	A23	90	83.117	0.0463902	0.0523026
23	A23	91	83.375	0.0428517	0.034973
23	A23	92	83.6331	0.0406404	0.0246077
23	A23	93	83.8911	0.0391347	0.0183344
23	A23	94	84.1492	0.0381825	0.0143282
23	A23	95	84.4072	0.0364499	0.011586
23	A23	96	84.6653	0.0360265	0.00961004
23	A23	97	84.9233	0.0347393	0.0081553
23	A23	98	85.1814	0.0344137	0.00707942
23	A23	99	85.4394	0.033765	0.00627779
23	A23	100	85.6975	0.0332725	0.00566699
23	A23	101	85.9555	0.0318284	0.00518756
23	A23	102	86.2136	0.031669	0.00480586
23	A23	103	86.4716	0.0311491	0.00450707
23	A23	104	86.7297	0.0316577	0.00428338
23	A23	105	86.9877	0.0297079	0.00412619
23	A23	106	87.2458	0.0291694	0.00402507
23	A23	107	87.5038	0.029216	0.00396842
23	A23	108	87.7619	0.0295297	0.00394066
23	A23	109	88.0199	0.0282382	0.00391916
23	A23	110	88.278	0.0265832	0.00387756
23	A23	111	88.536	0.0280644	0.00379565
23	A23	112	88.7941	0.026706	0.00366814
23	A23	113	89.0521	0.0263703	0.00350564
23	A23	114	89.3102	0.0253807	0.00332848
23	A23	115	89.5683	0.0262003	0.00315903
23	A23	116	89.8263	0.0253348	0.00301671
23	A23	117	90.0844	0.0247892	0.00291622
23	A23	118	90.3424	0.0244213	0.00286597
23	A23	119	90.6004	0.0244922	0.00286384
23	A23	120	90.8585	0.0242278	0.00289169
23	A23	121	91.1166	0.024128	0.00291624
23	A23	122	91.3746	0.022433	0.00290206
23	A23	123	91.6327	0.0226532	0.00283198
23	A23	124	91.8907	0.0226731	0.00271998
23	A23	125	92.1488	0.0223287	0.00260493
23	A23	126	92.4068	0.0219117	0.00252796
23	A23	127	92.6649	0.0218616	0.00250841
23	A23	128	92.9229	0.0213042	0.00253205
23	A23	129	93.181	0.0215132	0.00255618
23	A23	130	93.439	0.020578	0.00252711
23	A23	131	93.6971	0.0197701	0.00240129
23	A23	132	93.9551	0.0201363	0.00216105
23	A23	133	94.2132	0.0200892	0.00181976
23	A23	134	94.4712	0.0192603	0.00141598
23	A23	135	94.7293	0.0194025	0.00100143
24	A24	1	60.1504	1.48628	0.0619511
24	A24	2	60.4085	1.48127	0.0605786
24	A24	3	60.6665	1.47483	0.0595346
24	A24	4	60.9246	1.47235	0.0592511
24	A24	5	61.1826	1.46738	0.0598946
24	A24	6	61.4407	1.4595	0.0612614
24	A24	7	61.6987	1.45351	0.0628862
24	A24	8	61.9568	1.44114	0.0643074
24	A24	9	62.2148	1.42998	0.0653042
24	A24	10	62.4729	1.42323	0.0659512
24	A24	11	62.7309	1.42125	0.0664745
24	A24	12	62.989	1.40586	0.0670436
24	A24	13	63.247	1.40638	0.0676661
24	A24	14	63.5051	1.39218	0.0682363
24	A24	15	63.7631	1.37969	0.0686682
24	A24	16	64.0212	1.37708	0.0689781
24	A24	17	64.2792	1.36429	0.0692442
24	A24	18	64.5373	1.36118	0.0695029
24	A24	19	64.7953	1.35055	0.0696878
24	A24	20	65.0534	1.34317	0.0696931
24	A24	21	65.3114	1.32945	0.0695031
24	A24	22	65.5695	1.32122	0.069275
24	A24	23	65.8275	1.31478	0.0692806
24	A24	24	66.0856	1.30917	0.0697373
24	A24	25	66.3436	1.29968	0.070647
24	A24	26	66.6017	1.29007	0.0717612
24	A24	27	66.8597	1.28454	0.072713
24	A24	28	67.1178	1.2696	0.0732261
24	A24	29	67.3758	1.26044	0.073271
24	A24	30	67.6339	1.25086	0.0730674
24	A24	31	67.8919	1.24414	0.0729361
24	A24	32	68.15	1.23784	0.0731051
24	A24	33	68.408	1.2276	0.0735929
24	A24	34	68.6661	1.21652	0.0742338
24	A24	35	68.9241	1.21013	0.0747982
24	A24	36	69.1822	1.19592	0.0751131
24	A24	37	69.4402	1.19034	0.0751073
24	A24	38	69.6983	1.17871	0.0747796
24	A24	39	69.9563	1.17194	0.0741462
24	A24	40	70.2144	1.16151	0.0732293
24	A24	41	70.4725	1.15124	0.0720893
24	A24	42	70.7305	1.14239	0.070862
24	A24	43	70.9886	1.1331	0.0697439
24	A24	44	71.2466	1.12641	0.0689209
24	A24	45	71.5047	1.12081	0.0684872
24	A24	46	71.7627	1.10939	0.0684178
24	A24	47	72.0208	1.10148	0.0686075
24	A24	48	72.2788	1.09189	0.0689371
24	A24	49	72.5369	1.085	0.0693182
24	A24	50	72.7949	1.0758	0.0696916
24	A24	51	73.053	1.068	0.0700081
24	A24	52	73.311	1.0577	0.0702157
24	A24	53	73.5691	1.04869	0.0702698
24	A24	54	73.8271	1.04164	0.0701505
24	A24	55	74.0852	1.03178	0.0698728
24	A24	56	74.3432	1.02283	0.0694925
24	A24	57	74.6013	1.01393	0.0690946
24	A24	58	74.8593	1.00664	0.0687812
24	A24	59	75.1174	0.998587	0.06865
24	A24	60	75.3754	0.987251	0.0687832
24	A24	61	75.6335	0.983176	0.069253
24	A24	62	75.8915	0.971998	0.0701768
24	A24	63	76.1496	0.964933	0.0718112
24	A24	64	76.4076	0.95414	0.0746849
24	A24	65	76.6657	0.946658	0.0797092
24	A24	66	76.9237	0.937444	0.0881749
24	A24	67	77.1818	0.929614	0.10154
24	A24	68	77.4398	0.919728	0.120953
24	A24	69	77.6979	0.906341	0.146619
24	A24	70	77.9559	0.899555	0.177341
24	A24	71	78.214	0.880074	0.210683
24	A24	72	78.472	0.84806	0.244008
24	A24	73	78.7301	0.792571	0.276087
24	A24	74	78.9881	0.743109	0.308343
24	A24	75	79.2462	0.70621	0.344667
24	A24	76	79.5042	0.682588	0.38936
24	A24	77	79.7623	0.656862	0.443952
24	A24	78	80.0203	0.621442	0.504572
24	A24	79	80.2784	0.553371	0.561544
24	A24	80	80.5365	0.442304	0.601858
24	A24	81	80.7945	0.321781	0.61358
24	A24	82	81.0526	0.203941	0.590265
24	A24	83	81.3106	0.109526	0.533373
24	A24	84	81.5687	0.0400412	0.451733
24	A24	85	81.8267	0.00515048	0.358515
24	A24	86	82.0848	-0.00697264	0.267135
24	A24	87	82.3428	-0.0116053	0.187797
24	A24	88	82.6009	-0.0140219	0.125767
24	A24	89	82.8589	-0.0183707	0.0815598
24	A24	90	83.117	-0.0207304	0.0524545
24	A24	91	83.375	-0.0245008	0.0343895
24	A24	92	83.6331	-0.0277325	0.0234765
24	A24	93	83.8911	-0.0281399	0.0167859
24	A24	94	84.1492	-0.0291454	0.0124727
24	A24	95	84.4072	-0.0294042	0.0095277
24	A24	96	84.6653	-0.0312696	0.00744182
24	A24	97	84.9233	-0.031209	0.00594795
24	A24	98	85.1814	-0.0312735	0.00488206
24	A24	99	85.4394	-0.0323567	0.00412982
24	A24	100	85.6975	-0.0328564	0.00361209
24	A24	101	85.9555	-0.0323704	0.00327839
24	A24	102	86.2136	-0.0333472	0.00309593
24	A24	103	86.4716	-0.0335438	0.00303338
24	A24	104	86.7297	-0.0339686	0.00304536
24	A24	105	86.9877	-0.0338075	0.00306829
24	A24	106	87.2458	-0.0351557	0.00303512
24	A24	107	87.5038	-0.0356361	0.00290479
24	A24	108	87.7619	-0.036244	0.00268728
24	A24	109	88.0199	-0.0358728	0.00244218
24	A24	110	88.278	-0.0358863	0.00224592
24	A24	111	88.536	-0.0357396	0.00214754
24	A24	112	88.7941	-0.0365424	0.00214316
24	A24	113	89.0521	-0.0371956	0.00218428
24	A24	114	89.3102	-0.0370554	0.00220966
24	A24	115	89.5683	-0.0375343	0.00217632
24	A24	116	89.8263	-0.0377432	0.00207312
24	A24	117	90.0844	-0.0381271	0.00191716
24	A24	118	90.3424	-0.0380424	0.00174254
24	A24	119	90.6004	-0.0387284	0.00158828
24	A24	120	90.8585	-0.0383574	0.00148639
24	A24	121	91.1166	-0.0381772	0.00145045
24	A24	122	91.3746	-0.0389327	0.00146987
24	A24	123	91.6327	-0.0388941	0.00151473
24	A24	124	91.8907	-0.039326	0.00155014
24	A24	125	92.1488	-0.0396708	0.00155096
24	A24	126	92.4068	-0.039501	0.00150799
24	A24	127	92.6649	-0.0396447	0.00142523
24	A24	128	92.9229	-0.0398873	0.00131485
24	A24	129	93.181	-0.0407003	0.00119464
24	A24	130	93.439	-0.0401328	0.00108477
24	A24	131	93.6971	-0.0400892	0.000998518
24	A24	132	93.9551	-0.0401577	0.000930359
24	A24	133	94.2132	-0.0404113	0.000853562
24	A24	134	94.4712	-0.0411058	0.00073546
24	A24	135	94.7293	-0.0414043	0.000562102
46	B22	1	60.1504	1.63887	0.0768772
46	B22	2	60.4085	1.63092	0.0766603
46	B22	3	60.6665	1.62253	0.0764745
46	B22	4	60.9246	1.6161	0.076445
46	B22	5	61.1826	1.6093	0.0766726
46	B22	6	61.4407	1.60069	0.0771639
46	B22	7	61.6987	1.5923	0.0778193
46	B22	8	61.9568	1.5832	0.0784947
46	B22	9	62.2148	1.57249	0.0790735
46	B22	10	62.4729	1.56423	0.0794955
46	B22	11	62.7309	1.55821	0.0797401
46	B22	12	62.989	1.54913	0.0797998
46	B22	13	63.247	1.53822	0.0796841
46	B22	14	63.5051	1.52604	0.0794349
46	B22	15	63.7631	1.52265	0.0791214
46	B22	16	64.0212	1.51333	0.0788111
46	B22	17	64.2792	1.50623	0.0785418
46	B22	18	64.5373	1.49131	0.0783254
46	B22	19	64.7953	1.48686	0.0781641
46	B22	20	65.0534	1.4796	0.0780533
46	B22	21	65.3114	1.46981	0.077975
46	B22	22	65.5695	1.46061	0.0779016
46	B22	23	65.8275	1.4523	0.0778219
46	B22	24	66.0856	1.44308	0.0777665
46	B22	25	66.3436	1.43404	0.0778034
46	B22	26	66.6017	1.42876	0.0779967
46	B22	27	66.8597	1.41846	0.0783627
46	B22	28	67.1178	1.40752	0.0788387
46	B22	29	67.3758	1.40309	0.0792918
46	B22	30	67.6339	1.391	0.0795647
46	B22	31	67.8919	1.38685	0.0795405
46	B22	32	68.15	1.36873	0.0792122
46	B22	33	68.408	1.3647	0.0786978
46	B22	34	68.6661	1.36038	0.0782002
46	B22	35	68.9241	1.34515	0.0779158
46	B22	36	69.1822	1.34027	0.0779438
46	B22	37	69.4402	1.33105	0.0782397
46	B22	38	69.6983	1.32664	0.0786404
46	B22	39	69.9563	1.31154	0.0789457
46	B22	40	70.2144	1.30529	0.079024
46	B22	41	70.4725	1.29442	0.078875
46	B22	42	70.7305	1.28863	0.078622
46	B22	43	70.9886	1.27861	0.0784278
46	B22	44	71.2466	1.26878	0.0783938
46	B22	45	71.5047	1.26354	0.0784911
46	B22	46	71.7627	1.25425	0.0785784
46	B22	47	72.0208	1.24545	0.078492
46	B22	48	72.2788	1.23221	0.0781645
46	B22	49	72.5369	1.22542	0.0776816
46	B22	50	72.7949	1.22003	0.0772467
46	B22	51	73.053	1.20887	0.0770644
46	B22	52	73.311	1.20123	0.0772249
46	B22	53	73.5691	1.19487	0.077656
46	B22	54	73.8271	1.18513	0.0781611
46	B22	55	74.0852	1.17505	0.0785217
46	B22	56	74.3432	1.16556	0.0785878
46	B22	57	74.6013	1.15881	0.0783254
46	B22	58	74.8593	1.14775	0.0777983
46	B22	59	75.1174	1.14145	0.0771182
46	B22	60	75.3754	1.13026	0.0764095
46	B22	61	75.6335	1.12613	0.0758308
46	B22	62	75.8915	1.11424	0.0756535
46	B22	63	76.1496	1.10599	0.0763677
46	B22	64	76.4076	1.09885	0.0787633
46	B22	65	76.6657	1.09143	0.0839415
46	B22	66	76.9237	1.08456	0.0932305
46	B22	67	77.1818	1.07814	0.10797
46	B22	68	77.4398	1.06483	0.129127
46	B22	69	77.6979	1.05253	0.156777
46	B22	70	77.9559	1.04614	0.1897
46	B22	71	78.214	1.02618	0.22549
46	B22	72	78.472	0.997362	0.2615
46	B22	73	78.7301	0.949429	0.296424
46	B22	74	78.9881	0.89999	0.331642
46	B22	75	79.2462	0.857765	0.371148
46	B22	76	79.5042	0.835233	0.419477
46	B22	77	79.7623	0.815963	0.478271
46	B22	78	80.0203	0.778467	0.54332
46	B22	79	80.2784	0.720725	0.60403
46	B22	80	80.5365	0.606851	0.64615
46	B22	81	80.7945	0.486306	0.656765
46	B22	82	81.0526	0.375786	0.629232
46	B22	83	81.3106	0.286542	0.565757
46	B22	84	81.5687	0.224857	0.476542
46	B22	85	81.8267	0.194362	0.376185
46	B22	86	82.0848	0.183291	0.279092
46	B22	87	82.3428	0.179599	0.195824
46	B22	88	82.6009	0.175805	0.131486
46	B22	89	82.8589	0.172069	0.0861801
46	B22	90	83.117	0.168618	0.0567578
46	B22	91	83.375	0.165955	0.0388257
46	B22	92	83.6331	0.163416	0.0282625
46	B22	93	83.8911	0.161608	0.0219636
46	B22	94	84.1492	0.15912	0.0179454
46	B22	95	84.4072	0.158692	0.0151088
46	B22	96	84.6653	0.156715	0.0129219
46	B22	97	84.9233	0.155571	0.0111659
46	B22	98	85.1814	0.154267	0.00977148
46	B22	99	85.4394	0.154214	0.00872471
46	B22	100	85.6975	0.153476	0.00801428
46	B22	101	85.9555	0.152981	0.00760795
46	B22	102	86.2136	0.151635	0.00745076
46	B22	103	86.4716	0.150869	0.00747307
46	B22	104	86.7297	0.150003	0.00759598
46	B22	105	86.9877	0.149617	0.00773309
46	B22	106	87.2458	0.147815	0.00779783
46	B22	107	87.5038	0.146557	0.00772485
46	B22	108	87.7619	0.14554	0.00749338
46	B22	109	88.0199	0.145604	0.00713385
46	B22	110	88.278	0.144958	0.00670901
46	B22	111	88.536	0.143469	0.00628372
46	B22	112	88.7941	0.143882	0.00590794
46	B22	113	89.0521	0.14242	0.00561998
46	B22	114	89.3102	0.141879	0.0054576
46	B22	115	89.5683	0.14234	0.00545607
46	B22	116	89.8263	0.141046	0.00562587
46	B22	117	90.0844	0.141008	0.00592622
46	B22	118	90.3424	0.140458	0.00625964
46	B22	119	90.6004	0.138347	0.00650144
46	B22	120	90.8585	0.138132	0.00655343
46	B22	121	91.1166	0.136521	0.00639073
46	B22	122	91.3746	0.137026	0.00607279
46	B22	123	91.6327	0.135755	0.00571195
46	B22	124	91.8907	0.136096	0.00541781
46	B22	125	92.1488	0.135051	0.00524943
46	B22	126	92.4068	0.134682	0.00519735
46	B22	127	92.6649	0.13443	0.0051987
46	B22	128	92.9229	0.132642	0.00517061
46	B22	129	93.181	0.132808	0.00504198
46	B22	130	93.439	0.132288	0.00476922
46	B22	131	93.6971	0.13128	0.00433764
46	B22	132	93.9551	0.131239	0.00375661
46	B22	133	94.2132	0.130686	0.00305902
46	B22	134	94.4712	0.130062	0.00230318
46	B22	135	94.7293	0.130579	0.0015673
47	B23	1	60.1504	1.48874	0.0638851
47	B23	2	60.4085	1.48393	0.0637826
47	B23	3	60.6665	1.47398	0.0634199
47	B23	4	60.9246	1.46666	0.0628759
47	B23	5	61.1826	1.45996	0.062363
47	B23	6	61.4407	1.45347	0.0621284
47	B23	7	61.6987	1.44637	0.0623253
47	B23	8	61.9568	1.44063	0.0629437
47	B23	9	62.2148	1.43316	0.0638338
47	B23	10	62.4729	1.42073	0.0647941
47	B23	11	62.7309	1.41674	0.0656584
47	B23	12	62.989	1.40742	0.0663373
47	B23	13	63.247	1.40151	0.066817
47	B23	14	63.5051	1.38841	0.0671456
47	B23	15	63.7631	1.38445	0.0674203
47	B23	16	64.0212	1.37474	0.0677622
47	B23	17	64.2792	1.36713	0.0682587
47	B23	18	64.5373	1.35831	0.0688912
47	B23	19	64.7953	1.35076	0.0694951
47	B23	20	65.0534	1.34664	0.0698061
47	B23	21	65.3114	1.33325	0.0696006
47	B23	22	65.5695	1.32094	0.0688529
47	B23	23	65.8275	1.31391	0.0677901
47	B23	24	66.0856	1.30716	0.0667922
47	B23	25	66.3436	1.30464	0.066193
47	B23	26	66.6017	1.2913	0.0661193
47	B23	27	66.8597	1.28738	0.06647
47	B23	28	67.1178	1.2764	0.0670315
47	B23	29	67.3758	1.2699	0.0676272
47	B23	30	67.6339	1.25818	0.0682026
47	B23	31	67.8919	1.2536	0.0687972
47	B23	32	68.15	1.24287	0.0694527
47	B23	33	68.408	1.23946	0.0701276
47	B23	34	68.6661	1.22498	0.0706924
47	B23	35	68.9241	1.22198	0.0709992
47	B23	36	69.1822	1.20588	0.070971
47	B23	37	69.4402	1.20062	0.0706426
47	B23	38	69.6983	1.19301	0.070141
47	B23	39	69.9563	1.18585	0.0696302
47	B23	40	70.2144	1.17531	0.0692678
47	B23	41	70.4725	1.16481	0.0691755
47	B23	42	70.7305	1.15921	0.0694087
47	B23	43	70.9886	1.15569	0.0699252
47	B23	44	71.2466	1.14237	0.0705767
47	B23	45	71.5047	1.13256	0.0711523
47	B23	46	71.7627	1.12631	0.0714476
47	B23	47	72.0208	1.11611	0.0713322
47	B23	48	72.2788	1.10814	0.0707861
47	B23	49	72.5369	1.09828	0.0699081
47	B23	50	72.7949	1.08944	0.0688963
47	B23	51	73.053	1.08163	0.0679952
47	B23	52	73.311	1.07453	0.0674063
47	B23	53	73.5691	1.06615	0.0671994
47	B23	54	73.8271	1.06176	0.0672767
47	B23	55	74.0852	1.04995	0.0674308
47	B23	56	74.3432	1.04181	0.0674689
47	B23	57	74.6013	1.03233	0.0673314
47	B23	58	74.8593	1.02485	0.0671299
47	B23	59	75.1174	1.01782	0.0670804
47	B23	60	75.3754	1.00939	0.0673865
47	B23	61	75.6335	1.0029	0.0681576
47	B23	62	75.8915	0.995411	0.0694214
47	B23	63	76.1496	0.983452	0.0712525
47	B23	64	76.4076	0.97731	0.0739686
47	B23	65	76.6657	0.968555	0.0783203
47	B23	66	76.9237	0.958184	0.0855523
47	B23	67	77.1818	0.948593	0.0972278
47	B23	68	77.4398	0.941971	0.114756
47	B23	69	77.6979	0.933623	0.138722
47	B23	70	77.9559	0.922696	0.168352
47	B23	71	78.214	0.905397	0.201533
47	B23	72	78.472	0.876315	0.235672
47	B23	73	78.7301	0.834898	0.269184
47	B23	74	78.9881	0.779645	0.302779
47	B23	75	79.2462	0.739593	0.339559
47	B23	76	79.5042	0.715501	0.383336
47	B23	77	79.7623	0.690271	0.435711
47	B23	78	80.0203	0.656005	0.493403
47	B23	79	80.2784	0.595077	0.547562
47	B23	80	80.5365	0.493397	0.585878
47	B23	81	80.7945	0.373063	0.596786
47	B23	82	81.0526	0.262131	0.57386
47	B23	83	81.3106	0.171115	0.51835
47	B23	84	81.5687	0.107123	0.438775
47	B23	85	81.8267	0.0750457	0.347965
47	B23	86	82.0848	0.0627334	0.259022
47	B23	87	82.3428	0.0580298	0.181905
47	B23	88	82.6009	0.0553252	0.121745
47	B23	89	82.8589	0.0529988	0.0790445
47	B23	90	83.117	0.0494185	0.0511493
47	B23	91	83.375	0.0467077	0.0340743
47	B23	92	83.6331	0.0440717	0.0239698
47	B23	93	83.8911	0.0424827	0.0179022
47	B23	94	84.1492	0.040592	0.014012
47	B23	95	84.4072	0.0398612	0.0113004
47	B23	96	84.6653	0.0393604	0.00930173
47	B23	97	84.9233	0.0386077	0.00780954
47	B23	98	85.1814	0.0373962	0.00671121
47	B23	99	85.4394	0.0369464	0.00591797
47	B23	100	85.6975	0.0367732	0.00534964
47	B23	101	85.9555	0.0358393	0.00494014
47	B23	102	86.2136	0.0356895	0.00464516
47	B23	103	86.4716	0.0342131	0.00444436
47	B23	104	86.7297	0.0346077	0.00433329
47	B23	105	86.9877	0.0337425	0.00430626
47	B23	106	87.2458	0.0331489	0.00433823
47	B23	107	87.5038	0.0332135	0.00437986
47	B23	108	87.7619	0.0316718	0.00437274
47	B23	109	88.0199	0.0309516	0.00427738
47	B23	110	88.278	0.0309174	0.00409442
47	B23	111	88.536	0.0303319	0.00386401
47	B23	112	88.7941	0.0305403	0.00364395
47	B23	113	89.0521	0.0297406	0.00348217
47	B23	114	89.3102	0.0286987	0.00339823
47	B23	115	89.5683	0.0297367	0.00337878
47	B23	116	89.8263	0.0284857	0.00338453
47	B23	117	90.0844	0.0282799	0.00336566
47	B23	118	90.3424	0.027278	0.00328317
47	B23	119	90.6004	0.0268594	0.00312816
47	B23	120	90.8585	0.0271219	0.00292763
47	B23	121	91.1166	0.0266186	0.00273051
47	B23	122	91.3746	0.0263924	0.00258206
47	B23	123	91.6327	0.026374	0.00250285
47	B23	124	91.8907	0.0256913	0.00248395
47	B23	125	92.1488	0.0254812	0.00249746
47	B23	126	92.4068	0.025142	0.00251212
47	B23	127	92.6649	0.0250512	0.00250374
47	B23	128	92.9229	0.0243093	0.00245772
47	B23	129	93.181	0.0243778	0.00236638
47	B23	130	93.439	0.0239792	0.00222559
47	B23	131	93.6971	0.0234746	0.00203308
47	B23	132	93.9551	0.0234539	0.00178875
47	B23	133	94.2132	0.0235983	0.00149704
47	B23	134	94.4712	0.0228489	0.00117093
47	B23	135	94.7293	0.022714	0.000834771
48	B24	1	60.1504	1.46948	0.0616199
48	B24	2	60.4085	1.46612	0.0616603
48	B24	3	60.6665	1.46219	0.061934
48	B24	4	60.9246	1.4519	0.0623951
48	B24	5	61.1826	1.44894	0.0629275
48	B24	6	61.4407	1.43445	0.0633997
48	B24	7	61.6987	1.43113	0.063726
48	B24	8	61.9568	1.42194	0.0638968
48	B24	9	62.2148	1.4124	0.0639596
48	B24	10	62.4729	1.40548	0.0639718
48	B24	11	62.7309	1.40139	0.0639678
48	B24	12	62.989	1.39054	0.0639704
48	B24	13	63.247	1.38044	0.064026
48	B24	14	63.5051	1.37307	0.0642247
48	B24	15	63.7631	1.36969	0.0646634
48	B24	16	64.0212	1.35855	0.0653751
48	B24	17	64.2792	1.35278	0.066283
48	B24	18	64.5373	1.34319	0.0672008
48	B24	19	64.7953	1.33401	0.0678956
48	B24	20	65.0534	1.32793	0.0681872
48	B24	21	65.3114	1.318	0.0680358
48	B24	22	65.5695	1.3062	0.0675884
48	B24	23	65.8275	1.2988	0.0671387
48	B24	24	66.0856	1.29351	0.0670055
48	B24	25	66.3436	1.28782	0.0673752
48	B24	26	66.6017	1.27262	0.0682076
48	B24	27	66.8597	1.27578	0.0692516
48	B24	28	67.1178	1.25862	0.0701771
48	B24	29	67.3758	1.24775	0.0707323
48	B24	30	67.6339	1.24171	0.0708428
48	B24	31	67.8919	1.2338	0.0706063
48	B24	32	68.15	1.22561	0.0702152
48	B24	33	68.408	1.21296	0.0698613
48	B24	34	68.6661	1.20613	0.0696606
48	B24	35	68.9241	1.20406	0.069621
48	B24	36	69.1822	1.18712	0.0696683
48	B24	37	69.4402	1.18422	0.0696959
48	B24	38	69.6983	1.17205	0.0696315
48	B24	39	69.9563	1.16139	0.0694582
48	B24	40	70.2144	1.15968	0.0691897
48	B24	41	70.4725	1.14657	0.0688309
48	B24	42	70.7305	1.13896	0.0683719
48	B24	43	70.9886	1.13141	0.0678264
48	B24	44	71.2466	1.12	0.0672785
48	B24	45	71.5047	1.11429	0.0668859
48	B24	46	71.7627	1.10614	0.0668169
48	B24	47	72.0208	1.09769	0.0671485
48	B24	48	72.2788	1.09142	0.0677998
48	B24	49	72.5369	1.08403	0.0685463
48	B24	50	72.7949	1.07091	0.069125
48	B24	51	73.053	1.06512	0.0693785
48	B24	52	73.311	1.0547	0.0693385
48	B24	53	73.5691	1.04328	0.0691948
48	B24	54	73.8271	1.03879	0.0691518
48	B24	55	74.0852	1.03336	0.0692637
48	B24	56	74.3432	1.02283	0.0693763
48	B24	57	74.6013	1.01305	0.0692295
48	B24	58	74.8593	1.00256	0.0686605
48	B24	59	75.1174	0.993635	0.0677676
48	B24	60	75.3754	0.984584	0.0669129
48	B24	61	75.6335	0.978846	0.0665769
48	B24	62	75.8915	0.974892	0.0671808
48	B24	63	76.1496	0.965524	0.069051
48	B24	64	76.4076	0.956434	0.0725679
48	B24	65	76.6657	0.944479	0.0784026
48	B24	66	76.9237	0.937025	0.0876314
48	B24	67	77.1818	0.931238	0.101551
48	B24	68	77.4398	0.920831	0.121177
48	B24	69	77.6979	0.910404	0.146606
48	B24	70	77.9559	0.895307	0.176605
48	B24	71	78.214	0.878289	0.208801
48	B24	72	78.472	0.845079	0.240678
48	B24	73	78.7301	0.80109	0.271072
48	B24	74	78.9881	0.745875	0.30135
48	B24	75	79.2462	0.706709	0.335281
48	B24	76	79.5042	0.685082	0.37714
48	B24	77	79.7623	0.662618	0.428646
48	B24	78	80.0203	0.628664	0.486318
48	B24	79	80.2784	0.564891	0.540948
48	B24	80	80.5365	0.460563	0.579907
48	B24	81	80.7945	0.340456	0.591468
48	B24	82	81.0526	0.228659	0.569191
48	B24	83	81.3106	0.136966	0.51436
48	B24	84	81.5687	0.0720938	0.435497
48	B24	85	81.8267	0.0384575	0.34537
48	B24	86	82.0848	0.0265557	0.256992
48	B24	87	82.3428	0.0221893	0.180249
48	B24	88	82.6009	0.0195989	0.12025
48	B24	89	82.8589	0.0165907	0.0775268
48	B24	90	83.117	0.0130054	0.0494927
48	B24	91	83.375	0.0108621	0.0322457
48	B24	92	83.6331	0.00913896	0.0220053
48	B24	93	83.8911	0.00737363	0.0158735
48	B24	94	84.1492	0.00582703	0.0119901
48	B24	95	84.4072	0.00495715	0.00933407
48	B24	96	84.6653	0.00497247	0.00741631
48	B24	97	84.9233	0.00379877	0.00601401
48	B24	98	85.1814	0.00410378	0.0050026
48	B24	99	85.4394	0.00311292	0.00427945
48	B24	100	85.6975	0.00279631	0.00374887
48	B24	101	85.9555	0.00235149	0.00333428
48	B24	102	86.2136	0.00156106	0.0029912
48	B24	103	86.4716	0.00203343	0.00270813
48	B24	104	86.7297	0.00112734	0.00249458
48	B24	105	86.9877	0.00116308	0.00236279
48	B24	106	87.2458	0.000772277	0.00231064
48	B24	107	87.5038	0.000484177	0.00231205
48	B24	108	87.7619	0.00084778	0.00231918
48	B24	109	88.0199	-0.000560427	0.00227761
48	B24	110	88.278	-0.000681117	0.00214925
48	B24	111	88.536	-0.000980315	0.00193182
48	B24	112	88.7941	-0.000502748	0.00166362
48	B24	113	89.0521	-0.00152116	0.00140986
48	B24	114	89.3102	-0.000938423	0.00123591
48	B24	115	89.5683	-0.000970613	0.00117854
48	B24	116	89.8263	-0.00111605	0.00122705
48	B24	117	90.0844	-0.000994648	0.00132402
48	B24	118	90.3424	-0.00207997	0.00138898
48	B24	119	90.6004	-0.00186857	0.00135696
48	B24	120	90.8585	-0.0027912	0.00121233
48	B24	121	91.1166	-0.0024582	0.000997816
48	B24	122	91.3746	-0.00172942	0.000791811
48	B24	123	91.6327	-0.0024647	0.000667053
48	B24	124	91.8907	-0.00193788	0.000654601
48	B24	125	92.1488	-0.00249757	0.000732429
48	B24	126	92.4068	-0.0020109	0.000842029
48	B24	127	92.6649	-0.0031298	0.000920689
48	B24	128	92.9229	-0.00317659	0.000930155
48	B24	129	93.181	-0.00284977	0.000866786
48	B24	130	93.439	-0.0029701	0.000751268
48	B24	131	93.6971	-0.00294406	0.000609482
48	B24	132	93.9551	-0.00322154	0.000459955
48	B24	133	94.2132	-0.00356405	0.000314283
48	B24	134	94.4712	-0.00322567	0.000183832
48	B24	135	94.7293	-0.00279223	8.18654e-05
70	C22	1	60.1504	1.50137	0.0694224
70	C22	2	60.4085	1.49233	0.0697426
70	C22	3	60.6665	1.48175	0.0698163
70	C22	4	60.9246	1.47514	0.0696247
70	C22	5	61.1826	1.46955	0.0692852
70	C22	6	61.4407	1.4564	0.068977
70	C22	7	61.6987	1.45333	0.0688463
70	C22	8	61.9568	1.44525	0.0689468
70	C22	9	62.2148	1.43396	0.0692395
70	C22	10	62.4729	1.42585	0.0696274
70	C22	11	62.7309	1.4194	0.0699954
70	C22	12	62.989	1.41171	0.0702497
70	C22	13	63.247	1.40182	0.0703645
70	C22	14	63.5051	1.39166	0.0704206
70	C22	15	63.7631	1.38254	0.0705937
70	C22	16	64.0212	1.37656	0.0710614
70	C22	17	64.2792	1.37049	0.0718748
70	C22	18	64.5373	1.36077	0.0728871
70	C22	19	64.7953	1.35276	0.073795
70	C22	20	65.0534	1.34	0.0742934
70	C22	21	65.3114	1.33239	0.0742233
70	C22	22	65.5695	1.32234	0.073644
70	C22	23	65.8275	1.3129	0.072788
70	C22	24	66.0856	1.30752	0.071949
70	C22	25	66.3436	1.29616	0.0713715
70	C22	26	66.6017	1.29122	0.071177
70	C22	27	66.8597	1.27818	0.0713486
70	C22	28	67.1178	1.27442	0.0717498
70	C22	29	67.3758	1.26697	0.0721805
70	C22	30	67.6339	1.2519	0.0724426
70	C22	31	67.8919	1.24584	0.0724016
70	C22	32	68.15	1.23687	0.0720225
70	C22	33	68.408	1.23083	0.0713837
70	C22	34	68.6661	1.21941	0.0706596
70	C22	35	68.9241	1.20757	0.0700791
70	C22	36	69.1822	1.20322	0.0698375
70	C22	37	69.4402	1.20026	0.0699945
70	C22	38	69.6983	1.18613	0.0704264
70	C22	39	69.9563	1.17921	0.0708718
70	C22	40	70.2144	1.17104	0.0710594
70	C22	41	70.4725	1.15838	0.0708352
70	C22	42	70.7305	1.1529	0.0702232
70	C22	43	70.9886	1.14354	0.0693943
70	C22	44	71.2466	1.13691	0.0685868
70	C22	45	71.5047	1.12609	0.0680246
70	C22	46	71.7627	1.11992	0.0678469
70	C22	47	72.0208	1.11297	0.0680749
70	C22	48	72.2788	1.10515	0.0686068
70	C22	49	72.5369	1.09596	0.069259
70	C22	50	72.7949	1.08629	0.0698323
70	C22	51	73.053	1.07968	0.0701764
70	C22	52	73.311	1.06759	0.0702245
70	C22	53	73.5691	1.06386	0.0699972
70	C22	54	73.8271	1.05282	0.0695808
70	C22	55	74.0852	1.04181	0.0690974
70	C22	56	74.3432	1.03748	0.0686625
70	C22	57	74.6013	1.02857	0.0683485
70	C22	58	74.8593	1.02191	0.0681717
70	C22	59	75.1174	1.01096	0.0681249
70	C22	60	75.3754	1.00298	0.0682246
70	C22	61	75.6335	0.996396	0.0685395
70	C22	62	75.8915	0.98488	0.0691818
70	C22	63	76.1496	0.983012	0.0703166
70	C22	64	76.4076	0.973388	0.0722555
70	C22	65	76.6657	0.960139	0.0756458
70	C22	66	76.9237	0.952647	0.081632
70	C22	67	77.1818	0.944905	0.091801
70	C22	68	77.4398	0.936099	0.107766
70	C22	69	77.6979	0.932163	0.130458
70	C22	70	77.9559	0.918755	0.159433
70	C22	71	78.214	0.906273	0.192678
70	C22	72	78.472	0.882288	0.227244
70	C22	73	78.7301	0.83722	0.260675
70	C22	74	78.9881	0.789611	0.29257
70	C22	75	79.2462	0.747617	0.325286
70	C22	76	79.5042	0.709006	0.363008
70	C22	77	79.7623	0.686237	0.409217
70	C22	78	80.0203	0.662005	0.463683
70	C22	79	80.2784	0.617957	0.520643
70	C22	80	80.5365	0.529773	0.569451
70	C22	81	80.7945	0.423054	0.597723
70	C22	82	81.0526	0.311127	0.595692
70	C22	83	81.3106	0.207995	0.559818
70	C22	84	81.5687	0.124459	0.494105
70	C22	85	81.8267	0.0703052	0.408716
70	C22	86	82.0848	0.045165	0.316668
70	C22	87	82.3428	0.0374273	0.230068
70	C22	88	82.6009	0.0350532	0.157314
70	C22	89	82.8589	0.0323814	0.102035
70	C22	90	83.117	0.0302331	0.0636999
70	C22	91	83.375	0.027884	0.0392024
70	C22	92	83.6331	0.0263126	0.0245815
70	C22	93	83.8911	0.0255392	0.0162526
70	C22	94	84.1492	0.0244129	0.0115729
70	C22	95	84.4072	0.0235645	0.00887493
70	C22	96	84.6653	0.0224536	0.00723344
70	C22	97	84.9233	0.0225874	0.00618163
70	C22	98	85.1814	0.0215738	0.00548824
70	C22	99	85.4394	0.0213673	0.00502321
70	C22	100	85.6975	0.020797	0.0046974
70	C22	101	85.9555	0.0200622	0.00444904
70	C22	102	86.2136	0.0195344	0.0042482
70	C22	103	86.4716	0.0184346	0.00409615
70	C22	104	86.7297	0.01903	0.00400898
70	C22	105	86.9877	0.0182976	0.00399179
70	C22	106	87.2458	0.0173279	0.00401954
70	C22	107	87.5038	0.0173137	0.00403797
70	C22	108	87.7619	0.016192	0.00398479
70	C22	109	88.0199	0.0159201	0.00381899
70	C22	110	88.278	0.0152116	0.00354276
70	C22	111	88.536	0.0150848	0.00320436
70	C22	112	88.7941	0.0145019	0.00287946
70	C22	113	89.0521	0.0148048	0.00263774
70	C22	114	89.3102	0.0148193	0.00251074
70	C22	115	89.5683	0.0145548	0.00247945
70	C22	116	89.8263	0.0132137	0.0024901
70	C22	117	90.0844	0.0133533	0.00248831
70	C22	118	90.3424	0.0129996	0.00244836
70	C22	119	90.6004	0.0130453	0.0023791
70	C22	120	90.8585	0.0125963	0.00230682
70	C22	121	91.1166	0.0122532	0.00225134
70	C22	122	91.3746	0.0125381	0.002213
70	C22	123	91.6327	0.0113691	0.0021759
70	C22	124	91.8907	0.0115527	0.00212084
70	C22	125	92.1488	0.0115712	0.00203721
70	C22	126	92.4068	0.0106681	0.00192732
70	C22	127	92.6649	0.0108651	0.00180289
70	C22	128	92.9229	0.0109462	0.00167769
70	C22	129	93.181	0.0102953	0.00156024
70	C22	130	93.439	0.0103096	0.00144954
70	C22	131	93.6971	0.0103023	0.00133455
70	C22	132	93.9551	0.00990507	0.00119814
70	C22	133	94.2132	0.0101145	0.00102514
70	C22	134	94.4712	0.0092842	0.000812332
70	C22	135	94.7293	0.00952289	0.000574823
71	C23	1	60.1504	1.47318	0.0659316
71	C23	2	60.4085	1.46769	0.0665862
71	C23	3	60.6665	1.46288	0.0672414
71	C23	4	60.9246	1.45235	0.0676561
71	C23	5	61.1826	1.44665	0.0676606
71	C23	6	61.4407	1.43331	0.0672396
71	C23	7	61.6987	1.42636	0.0665476
71	C23	8	61.9568	1.42405	0.0658411
71	C23	9	62.2148	1.41234	0.0653695
71	C23	10	62.4729	1.40284	0.0652873
71	C23	11	62.7309	1.40171	0.0656155
71	C23	12	62.989	1.39155	0.0662622
71	C23	13	63.247	1.38079	0.0670732
71	C23	14	63.5051	1.37528	0.0678925
71	C23	15	63.7631	1.36668	0.0686018
71	C23	16	64.0212	1.35985	0.0691417
71	C23	17	64.2792	1.34855	0.0695122
71	C23	18	64.5373	1.34095	0.069753
71	C23	19	64.7953	1.33432	0.0699104
71	C23	20	65.0534	1.32584	0.070015
71	C23	21	65.3114	1.31805	0.0700766
71	C23	22	65.5695	1.30729	0.0701092
71	C23	23	65.8275	1.29873	0.0701571
71	C23	24	66.0856	1.29539	0.0702882
71	C23	25	66.3436	1.28149	0.0705501
71	C23	26	66.6017	1.27555	0.0709081
71	C23	27	66.8597	1.26895	0.0712191
71	C23	28	67.1178	1.25996	0.0712712
71	C23	29	67.3758	1.25011	0.0708973
71	C23	30	67.6339	1.23846	0.0700976
71	C23	31	67.8919	1.23284	0.0691003
71	C23	32	68.15	1.22416	0.0682976
71	C23	33	68.408	1.21583	0.0680779
71	C23	34	68.6661	1.2114	0.068629
71	C23	35	68.9241	1.20284	0.0698327
71	C23	36	69.1822	1.19798	0.0713009
71	C23	37	69.4402	1.18283	0.0725468
71	C23	38	69.6983	1.17417	0.0731848
71	C23	39	69.9563	1.16793	0.0730683
71	C23	40	70.2144	1.15659	0.0723029
71	C23	41	70.4725	1.14837	0.0711593
71	C23	42	70.7305	1.13929	0.0699398
71	C23	43	70.9886	1.13486	0.0688656
71	C23	44	71.2466	1.12421	0.0680299
71	C23	45	71.5047	1.11908	0.0674173
71	C23	46	71.7627	1.10644	0.066969
71	C23	47	72.0208	1.10162	0.0666412
71	C23	48	72.2788	1.09373	0.0664313
71	C23	49	72.5369	1.08534	0.0663598
71	C23	50	72.7949	1.07815	0.0664418
71	C23	51	73.053	1.06927	0.0666608
71	C23	52	73.311	1.06152	0.0669577
71	C23	53	73.5691	1.05529	0.0672461
71	C23	54	73.8271	1.04795	0.067449
71	C23	55	74.0852	1.03444	0.0675413
71	C23	56	74.3432	1.02926	0.0675629
71	C23	57	74.6013	1.02293	0.0675844
71	C23	58	74.8593	1.01422	0.067646
71	C23	59	75.1174	1.00582	0.0677174
71	C23	60	75.3754	0.998336	0.0677288
71	C23	61	75.6335	0.988391	0.0676534
71	C23	62	75.8915	0.982059	0.0676095
71	C23	63	76.1496	0.971327	0.0679371
71	C23	64	76.4076	0.966267	0.069245
71	C23	65	76.6657	0.958436	0.0724425
71	C23	66	76.9237	0.952319	0.0787453
71	C23	67	77.1818	0.940451	0.0895778
71	C23	68	77.4398	0.934945	0.106268
71	C23	69	77.6979	0.926519	0.129519
71	C23	70	77.9559	0.916132	0.158842
71	C23	71	78.214	0.903042	0.192352
71	C23	72	78.472	0.880833	0.227298
71	C23	73	78.7301	0.834768	0.261337
71	C23	74	78.9881	0.791113	0.293984
71	C23	75	79.2462	0.744992	0.327304
71	C23	76	79.5042	0.711486	0.365055
71	C23	77	79.7623	0.685053	0.410347
71	C23	78	80.0203	0.659928	0.462835
71	C23	79	80.2784	0.609064	0.517013
71	C23	80	80.5365	0.53114	0.562808
71	C23	81	80.7945	0.426925	0.588498
71	C23	82	81.0526	0.318319	0.584819
71	C23	83	81.3106	0.219368	0.548412
71	C23	84	81.5687	0.13688	0.483164
71	C23	85	81.8267	0.0843267	0.398942
71	C23	86	82.0848	0.0622602	0.308429
71	C23	87	82.3428	0.0549209	0.22344
71	C23	88	82.6009	0.0522662	0.152163
71	C23	89	82.8589	0.0501687	0.0980946
71	C23	90	83.117	0.0479953	0.060648
71	C23	91	83.375	0.045855	0.0367316
71	C23	92	83.6331	0.0447535	0.0224425
71	C23	93	83.8911	0.0442594	0.0142727
71	C23	94	84.1492	0.0428119	0.00964888
71	C23	95	84.4072	0.042589	0.0069538
71	C23	96	84.6653	0.0420939	0.00529212
71	C23	97	84.9233	0.0419604	0.00421421
71	C23	98	85.1814	0.0410371	0.0035032
71	C23	99	85.4394	0.0415472	0.00304523
71	C23	100	85.6975	0.0406215	0.00276376
71	C23	101	85.9555	0.0411512	0.00259377
71	C23	102	86.2136	0.0399963	0.00247746
71	C23	103	86.4716	0.0400769	0.00236994
71	C23	104	86.7297	0.039648	0.0022462
71	C23	105	86.9877	0.0393318	0.00210317
71	C23	106	87.2458	0.03887	0.00195437
71	C23	107	87.5038	0.0390796	0.00181888
71	C23	108	87.7619	0.0388563	0.00170933
71	C23	109	88.0199	0.0385824	0.00162471
71	C23	110	88.278	0.0384231	0.00155145
71	C23	111	88.536	0.0380115	0.00147127
71	C23	112	88.7941	0.0380536	0.00137056
71	C23	113	89.0521	0.0380199	0.00124644
71	C23	114	89.3102	0.0375083	0.00110742
71	C23	115	89.5683	0.0376958	0.000969731
71	C23	116	89.8263	0.037425	0.000851278
71	C23	117	90.0844	0.037855	0.000765373
71	C23	118	90.3424	0.0373771	0.000716735
71	C23	119	90.6004	0.0371426	0.000700736
71	C23	120	90.8585	0.0374072	0.0007052
71	C23	121	91.1166	0.037374	0.000713885
71	C23	122	91.3746	0.0370857	0.000711611
71	C23	123	91.6327	0.0369979	0.000691567
71	C23	124	91.8907	0.0363231	0.000661731
71	C23	125	92.1488	0.0373687	0.000643902
71	C23	126	92.4068	0.0368754	0.00066301
71	C23	127	92.6649	0.0366415	0.000731489
71	C23	128	92.9229	0.0369539	0.000838559
71	C23	129	93.181	0.0364182	0.000950783
71	C23	130	93.439	0.0362851	0.00102329
71	C23	131	93.6971	0.036461	0.00101677
71	C23	132	93.9551	0.0359043	0.000913844
71	C23	133	94.2132	0.0351291	0.000728647
71	C23	134	94.4712	0.036313	0.000503094
71	C23	135	94.7293	0.0361248	0.000289679
72	C24	1	60.1504	1.48301	0.0658527
72	C24	2	60.4085	1.47826	0.0654042
72	C24	3	60.6665	1.46914	0.0650973
72	C24	4	60.9246	1.46752	0.0650602
72	C24	5	61.1826	1.45875	0.0653308
72	C24	6	61.4407	1.44854	0.0658282
72	C24	7	61.6987	1.44411	0.0664058
72	C24	8	61.9568	1.43245	0.0669291
72	C24	9	62.2148	1.42384	0.067333
72	C24	10	62.4729	1.4197	0.0676301
72	C24	11	62.7309	1.41007	0.0678813
72	C24	12	62.989	1.4002	0.068162
72	C24	13	63.247	1.3936	0.06853
72	C24	14	63.5051	1.3842	0.0689852
72	C24	15	63.7631	1.37749	0.0694371
72	C24	16	64.0212	1.37129	0.0697177
72	C24	17	64.2792	1.36063	0.0696559
72	C24	18	64.5373	1.34897	0.0691953
72	C24	19	64.7953	1.34148	0.0684653
72	C24	20	65.0534	1.33546	0.0677468
72	C24	21	65.3114	1.3277	0.0673537
72	C24	22	65.5695	1.31822	0.0674932
72	C24	23	65.8275	1.31476	0.0681926
72	C24	24	66.0856	1.30435	0.0693114
72	C24	25	66.3436	1.29296	0.0706142
72	C24	26	66.6017	1.28852	0.0718442
72	C24	27	66.8597	1.28026	0.0727992
72	C24	28	67.1178	1.26696	0.0733773
72	C24	29	67.3758	1.26074	0.0736004
72	C24	30	67.6339	1.24835	0.0735902
72	C24	31	67.8919	1.24355	0.0734947
72	C24	32	68.15	1.23458	0.0734094
72	C24	33	68.408	1.22657	0.0733313
72	C24	34	68.6661	1.2129	0.0731835
72	C24	35	68.9241	1.2085	0.0728743
72	C24	36	69.1822	1.20056	0.072355
72	C24	37	69.4402	1.18626	0.0716417
72	C24	38	69.6983	1.1818	0.070794
72	C24	39	69.9563	1.17232	0.0698927
72	C24	40	70.2144	1.16737	0.0690221
72	C24	41	70.4725	1.15382	0.0682816
72	C24	42	70.7305	1.14752	0.0677878
72	C24	43	70.9886	1.13976	0.0676442
72	C24	44	71.2466	1.13422	0.0678832
72	C24	45	71.5047	1.12693	0.0684255
72	C24	46	71.7627	1.11485	0.069094
72	C24	47	72.0208	1.1078	0.0696801
72	C24	48	72.2788	1.10036	0.0700166
72	C24	49	72.5369	1.08954	0.0700211
72	C24	50	72.7949	1.08357	0.069707
72	C24	51	73.053	1.0723	0.0691699
72	C24	52	73.311	1.06603	0.0685703
72	C24	53	73.5691	1.0557	0.0680936
72	C24	54	73.8271	1.05086	0.0678947
72	C24	55	74.0852	1.04139	0.0680425
72	C24	56	74.3432	1.03439	0.0684867
72	C24	57	74.6013	1.02605	0.0690762
72	C24	58	74.8593	1.01663	0.069611
72	C24	59	75.1174	1.00812	0.069922
72	C24	60	75.3754	1.00082	0.0699344
72	C24	61	75.6335	0.989685	0.0697118
72	C24	62	75.8915	0.98216	0.0694719
72	C24	63	76.1496	0.975398	0.0695995
72	C24	64	76.4076	0.965725	0.0706791
72	C24	65	76.6657	0.960367	0.0735735
72	C24	66	76.9237	0.950537	0.0794971
72	C24	67	77.1818	0.942649	0.0899626
72	C24	68	77.4398	0.933621	0.106443
72	C24	69	77.6979	0.924098	0.129729
72	C24	70	77.9559	0.919563	0.159222
72	C24	71	78.214	0.906649	0.192673
72	C24	72	78.472	0.880919	0.226824
72	C24	73	78.7301	0.832237	0.258942
72	C24	74	78.9881	0.782481	0.288547
72	C24	75	79.2462	0.743763	0.31823
72	C24	76	79.5042	0.708798	0.352703
72	C24	77	79.7623	0.685987	0.396162
72	C24	78	80.0203	0.662223	0.449112
72	C24	79	80.2784	0.620787	0.506353
72	C24	80	80.5365	0.542417	0.557427
72	C24	81	80.7945	0.438174	0.589635
72	C24	82	81.0526	0.325519	0.592426
72	C24	83	81.3106	0.219782	0.561236
72	C24	84	81.5687	0.134437	0.499151
72	C24	85	81.8267	0.077564	0.415802
72	C24	86	82.0848	0.0506533	0.324162
72	C24	87	82.3428	0.0424811	0.236689
72	C24	88	82.6009	0.0391664	0.162326
72	C24	89	82.8589	0.0366387	0.105233
72	C24	90	83.117	0.034776	0.0652687
72	C24	91	83.375	0.0334448	0.0395321
72	C24	92	83.6331	0.0312087	0.0241076
72	C24	93	83.8911	0.0304435	0.0153571
72	C24	94	84.1492	0.030249	0.0105405
72	C24	95	84.4072	0.02947	0.00788758
72	C24	96	84.6653	0.0284534	0.00638233
72	C24	97	84.9233	0.027941	0.00548727
72	C24	98	85.1814	0.0279967	0.004925
72	C24	99	85.4394	0.0269666	0.00454437
72	C24	100	85.6975	0.0265415	0.00425367
72	C24	101	85.9555	0.0262842	0.00399518
72	C24	102	86.2136	0.0254259	0.00373957
72	C24	103	86.4716	0.025246	0.00348417
72	C24	104	86.7297	0.0243915	0.00324502
72	C24	105	86.9877	0.0244613	0.00304092
72	C24	106	87.2458	0.0243652	0.00287761
72	C24	107	87.5038	0.0237115	0.00274275
72	C24	108	87.7619	0.0228879	0.00261584
72	C24	109	88.0199	0.0230104	0.00248461
72	C24	110	88.278	0.0230678	0.00235441
72	C24	111	88.536	0.0222985	0.00224385
72	C24	112	88.7941	0.0224561	0.00217148
72	C24	113	89.0521	0.0221499	0.00214407
72	C24	114	89.3102	0.0217615	0.00215383
72	C24	115	89.5683	0.0218556	0.00218363
72	C24	116	89.8263	0.0208278	0.00221461
72	C24	117	90.0844	0.0211958	0.00223099
72	C24	118	90.3424	0.0209695	0.00222051
72	C24	119	90.6004	0.0200728	0.00217405
72	C24	120	90.8585	0.0205681	0.00208807
72	C24	121	91.1166	0.0194884	0.00196981
72	C24	122	91.3746	0.0196665	0.00184013
72	C24	123	91.6327	0.0198645	0.00172849
72	C24	124	91.8907	0.0191342	0.00165998
72	C24	125	92.1488	0.0195369	0.00164137
72	C24	126	92.4068	0.019167	0.00165565
72	C24	127	92.6649	0.01857	0.00166955
72	C24	128	92.9229	0.0187549	0.00165015
72	C24	129	93.181	0.0180654	0.00158029
72	C24	130	93.439	0.0180434	0.00146291
72	C24	131	93.6971	0.0182414	0.00131209
72	C24	132	93.9551	0.0180971	0.00113928
72	C24	133	94.2132	0.0177351	0.000946648
72	C24	134	94.4712	0.0173581	0.000733325
72	C24	135	94.7293	0.0174284	0.000507454
94	D22	1	60.1504	1.53921	0.0682661
94	D22	2	60.4085	1.53701	0.0690626
94	D22	3	60.6665	1.52488	0.0698643
94	D22	4	60.9246	1.51831	0.0704107
94	D22	5	61.1826	1.51246	0.0705141
94	D22	6	61.4407	1.49928	0.0701517
94	D22	7	61.6987	1.49308	0.0695023
94	D22	8	61.9568	1.48348	0.0688879
94	D22	9	62.2148	1.477	0.0686395
94	D22	10	62.4729	1.47084	0.0689319
94	D22	11	62.7309	1.46367	0.0696766
94	D22	12	62.989	1.45597	0.0705479
94	D22	13	63.247	1.44454	0.071137
94	D22	14	63.5051	1.43665	0.0711703
94	D22	15	63.7631	1.42808	0.0706666
94	D22	16	64.0212	1.41601	0.0699396
94	D22	17	64.2792	1.41115	0.0694283
94	D22	18	64.5373	1.40415	0.0694475
94	D22	19	64.7953	1.4002	0.0700073
94	D22	20	65.0534	1.39152	0.0708273
94	D22	21	65.3114	1.37801	0.071527
94	D22	22	65.5695	1.36889	0.0718755
94	D22	23	65.8275	1.36189	0.0719062
94	D22	24	66.0856	1.35465	0.0718533
94	D22	25	66.3436	1.34387	0.0719672
94	D22	26	66.6017	1.3416	0.0723484
94	D22	27	66.8597	1.32997	0.0729077
94	D22	28	67.1178	1.31953	0.0734425
94	D22	29	67.3758	1.3118	0.0737501
94	D22	30	67.6339	1.30274	0.0737016
94	D22	31	67.8919	1.29497	0.0732525
94	D22	32	68.15	1.28542	0.0724352
94	D22	33	68.408	1.27817	0.0713543
94	D22	34	68.6661	1.26654	0.0701861
94	D22	35	68.9241	1.25789	0.0691355
94	D22	36	69.1822	1.25631	0.0683586
94	D22	37	69.4402	1.24531	0.0678848
94	D22	38	69.6983	1.2389	0.0676113
94	D22	39	69.9563	1.22726	0.0673726
94	D22	40	70.2144	1.22145	0.067045
94	D22	41	70.4725	1.21567	0.0666267
94	D22	42	70.7305	1.20236	0.0662463
94	D22	43	70.9886	1.19942	0.0661102
94	D22	44	71.2466	1.1904	0.0664044
94	D22	45	71.5047	1.18353	0.0671936
94	D22	46	71.7627	1.17553	0.068357
94	D22	47	72.0208	1.17126	0.0696042
94	D22	48	72.2788	1.15791	0.0705791
94	D22	49	72.5369	1.14941	0.0710024
94	D22	50	72.7949	1.14111	0.0707841
94	D22	51	73.053	1.13207	0.070056
94	D22	52	73.311	1.12508	0.0691015
94	D22	53	73.5691	1.11596	0.0682347
94	D22	54	73.8271	1.10955	0.0676741
94	D22	55	74.0852	1.10104	0.0674704
94	D22	56	74.3432	1.09769	0.067508
94	D22	57	74.6013	1.08447	0.0675786
94	D22	58	74.8593	1.07563	0.0674892
94	D22	59	75.1174	1.07079	0.0671489
94	D22	60	75.3754	1.06216	0.0666159
94	D22	61	75.6335	1.05247	0.0660976
94	D22	62	75.8915	1.04642	0.0659297
94	D22	63	76.1496	1.03726	0.0665634
94	D22	64	76.4076	1.03277	0.0685854
94	D22	65	76.6657	1.02724	0.0727849
94	D22	66	76.9237	1.01538	0.0802371
94	D22	67	77.1818	1.00789	0.0922709
94	D22	68	77.4398	0.999504	0.110177
94	D22	69	77.6979	0.990386	0.134626
94	D22	70	77.9559	0.984503	0.165052
94	D22	71	78.214	0.966953	0.199436
94	D22	72	78.472	0.941762	0.234925
94	D22	73	78.7301	0.898466	0.269227
94	D22	74	78.9881	0.849976	0.302161
94	D22	75	79.2462	0.807807	0.336306
94	D22	76	79.5042	0.772324	0.375963
94	D22	77	79.7623	0.745229	0.424505
94	D22	78	80.0203	0.722016	0.481291
94	D22	79	80.2784	0.676499	0.53989
94	D22	80	80.5365	0.59175	0.588939
94	D22	81	80.7945	0.472451	0.615601
94	D22	82	81.0526	0.362324	0.610183
94	D22	83	81.3106	0.261497	0.56979
94	D22	84	81.5687	0.180433	0.499416
94	D22	85	81.8267	0.130215	0.410175
94	D22	86	82.0848	0.10818	0.31565
94	D22	87	82.3428	0.100822	0.228013
94	D22	88	82.6009	0.0976065	0.155327
94	D22	89	82.8589	0.0957129	0.100722
94	D22	90	83.117	0.0929361	0.0632167
94	D22	91	83.375	0.0906906	0.039421
94	D22	92	83.6331	0.089383	0.0252612
94	D22	93	83.8911	0.0873871	0.0171619
94	D22	94	84.1492	0.0865448	0.0125449
94	D22	95	84.4072	0.0862422	0.00981082
94	D22	96	84.6653	0.0848422	0.00807943
94	D22	97	84.9233	0.0845158	0.0069038
94	D22	98	85.1814	0.0836369	0.00606429
94	D22	99	85.4394	0.0832751	0.00545356
94	D22	100	85.6975	0.082226	0.00502068
94	D22	101	85.9555	0.0822363	0.00474183
94	D22	102	86.2136	0.0818873	0.00459937
94	D22	103	86.4716	0.0812606	0.00456807
94	D22	104	86.7297	0.0806166	0.00461027
94	D22	105	86.9877	0.0798217	0.00468047
94	D22	106	87.2458	0.0791688	0.00473379
94	D22	107	87.5038	0.0786137	0.00473343
94	D22	108	87.7619	0.0780091	0.00465474
94	D22	109	88.0199	0.0775927	0.00448676
94	D22	110	88.278	0.0765941	0.00423401
94	D22	111	88.536	0.0766457	0.00391828
94	D22	112	88.7941	0.0759917	0.00357941
94	D22	113	89.0521	0.0757375	0.00327092
94	D22	114	89.3102	0.0752191	0.00304847
94	D22	115	89.5683	0.0755829	0.00295107
94	D22	116	89.8263	0.0752476	0.00298275
94	D22	117	90.0844	0.0745744	0.00310484
94	D22	118	90.3424	0.0742306	0.00324672
94	D22	119	90.6004	0.0738044	0.0033322
94	D22	120	90.8585	0.072693	0.00330884
94	D22	121	91.1166	0.0727777	0.00316435
94	D22	122	91.3746	0.0728077	0.00292448
94	D22	123	91.6327	0.0719799	0.00263698
94	D22	124	91.8907	0.0715708	0.00235299
94	D22	125	92.1488	0.0723421	0.00211445
94	D22	126	92.4068	0.0714607	0.00194924
94	D22	127	92.6649	0.071203	0.00187076
94	D22	128	92.9229	0.0713756	0.00187691
94	D22	129	93.181	0.0710816	0.00194654
94	D22	130	93.439	0.0710644	0.00203568
94	D22	131	93.6971	0.0703053	0.00208246
94	D22	132	93.9551	0.0701299	0.0020242
94	D22	133	94.2132	0.0695444	0.00182346
94	D22	134	94.4712	0.069351	0.00148868
94	D22	135	94.7293	0.069342	0.00107499
95	D23	1	60.1504	1.44407	0.0639231
95	D23	2	60.4085	1.4392	0.0634869
95	D23	3	60.6665	1.43148	0.0629466
95	D23	4	60.9246	1.4219	0.0624956
95	D23	5	61.1826	1.41796	0.0623635
95	D23	6	61.4407	1.40996	0.0626945
95	D23	7	61.6987	1.40522	0.063451
95	D23	8	61.9568	1.39504	0.0644202
95	D23	9	62.2148	1.38646	0.0653195
95	D23	10	62.4729	1.37795	0.0659301
95	D23	11	62.7309	1.37053	0.0661908
95	D23	12	62.989	1.35893	0.0662028
95	D23	13	63.247	1.35596	0.0661684
95	D23	14	63.5051	1.34544	0.0663035
95	D23	15	63.7631	1.33591	0.066749
95	D23	16	64.0212	1.32901	0.0675133
95	D23	17	64.2792	1.3265	0.0684611
95	D23	18	64.5373	1.31179	0.0693643
95	D23	19	64.7953	1.30386	0.0700006
95	D23	20	65.0534	1.29494	0.070246
95	D23	21	65.3114	1.28476	0.0701083
95	D23	22	65.5695	1.2791	0.0696911
95	D23	23	65.8275	1.27038	0.0691342
95	D23	24	66.0856	1.25786	0.0685649
95	D23	25	66.3436	1.25413	0.0680791
95	D23	26	66.6017	1.24238	0.0677426
95	D23	27	66.8597	1.23934	0.0675853
95	D23	28	67.1178	1.22488	0.0675951
95	D23	29	67.3758	1.21927	0.0677141
95	D23	30	67.6339	1.21391	0.0678553
95	D23	31	67.8919	1.20254	0.0679348
95	D23	32	68.15	1.1934	0.0679102
95	D23	33	68.408	1.18297	0.0677959
95	D23	34	68.6661	1.1806	0.0676476
95	D23	35	68.9241	1.16998	0.0675249
95	D23	36	69.1822	1.15831	0.0674663
95	D23	37	69.4402	1.15486	0.0674851
95	D23	38	69.6983	1.14335	0.0675723
95	D23	39	69.9563	1.13592	0.0677002
95	D23	40	70.2144	1.12976	0.0678288
95	D23	41	70.4725	1.11868	0.0679166
95	D23	42	70.7305	1.11079	0.0679351
95	D23	43	70.9886	1.10153	0.0678677
95	D23	44	71.2466	1.09429	0.0676938
95	D23	45	71.5047	1.08864	0.0673883
95	D23	46	71.7627	1.07745	0.066949
95	D23	47	72.0208	1.06597	0.0664388
95	D23	48	72.2788	1.06025	0.0659924
95	D23	49	72.5369	1.05494	0.0657702
95	D23	50	72.7949	1.04668	0.0658717
95	D23	51	73.053	1.03516	0.066276
95	D23	52	73.311	1.02994	0.0668383
95	D23	53	73.5691	1.02264	0.0673494
95	D23	54	73.8271	1.01266	0.0676183
95	D23	55	74.0852	1.00083	0.0675412
95	D23	56	74.3432	0.995592	0.0671265
95	D23	57	74.6013	0.986865	0.066464
95	D23	58	74.8593	0.978548	0.0656789
95	D23	59	75.1174	0.970643	0.0648966
95	D23	60	75.3754	0.96452	0.0642556
95	D23	61	75.6335	0.950493	0.063935
95	D23	62	75.8915	0.948398	0.0641782
95	D23	63	76.1496	0.941942	0.0653145
95	D23	64	76.4076	0.932395	0.0678059
95	D23	65	76.6657	0.923355	0.072334
95	D23	66	76.9237	0.916721	0.0798644
95	D23	67	77.1818	0.90758	0.0915745
95	D23	68	77.4398	0.899649	0.10854
95	D23	69	77.6979	0.889213	0.131217
95	D23	70	77.9559	0.877126	0.158941
95	D23	71	78.214	0.863923	0.189844
95	D23	72	78.472	0.839177	0.221479
95	D23	73	78.7301	0.793745	0.252105
95	D23	74	78.9881	0.745597	0.282016
95	D23	75	79.2462	0.706346	0.31397
95	D23	76	79.5042	0.677232	0.352076
95	D23	77	79.7623	0.649672	0.399301
95	D23	78	80.0203	0.626147	0.454725
95	D23	79	80.2784	0.571452	0.512091
95	D23	80	80.5365	0.489174	0.560685
95	D23	81	80.7945	0.380117	0.58846
95	D23	82	81.0526	0.267338	0.586144
95	D23	83	81.3106	0.164144	0.550563
95	D23	84	81.5687	0.0797342	0.485802
95	D23	85	81.8267	0.0245218	0.40184
95	D23	86	82.0848	-0.000692128	0.31138
95	D23	87	82.3428	-0.00912086	0.226234
95	D23	88	82.6009	-0.0112095	0.154619
95	D23	89	82.8589	-0.013725	0.100109
95	D23	90	83.117	-0.0161755	0.0622065
95	D23	91	83.375	-0.0180448	0.0378886
95	D23	92	83.6331	-0.0197157	0.0232843
95	D23	93	83.8911	-0.0209354	0.0148904
95	D23	94	84.1492	-0.0211841	0.0101275
95	D23	95	84.4072	-0.0218746	0.00736923
95	D23	96	84.6653	-0.0227439	0.00570692
95	D23	97	84.9233	-0.0226953	0.00467063
95	D23	98	85.1814	-0.0233823	0.00401665
95	D23	99	85.4394	-0.0236068	0.00360314
95	D23	100	85.6975	-0.0238983	0.00333212
95	D23	101	85.9555	-0.0244597	0.00312983
95	D23	102	86.2136	-0.0249703	0.00294463
95	D23	103	86.4716	-0.0250469	0.00274953
95	D23	104	86.7297	-0.0259647	0.00254178
95	D23	105	86.9877	-0.0256571	0.0023366
95	D23	106	87.2458	-0.0265132	0.00215556
95	D23	107	87.5038	-0.0264317	0.0020131
95	D23	108	87.7619	-0.0259836	0.00190699
95	D23	109	88.0199	-0.0270025	0.00181829
95	D23	110	88.278	-0.0273932	0.00172212
95	D23	111	88.536	-0.0271834	0.00160332
95	D23	112	88.7941	-0.027441	0.00146679
95	D23	113	89.0521	-0.0277542	0.00133535
95	D23	114	89.3102	-0.0276069	0.00123621
95	D23	115	89.5683	-0.0276942	0.00118456
95	D23	116	89.8263	-0.0279561	0.0011736
95	D23	117	90.0844	-0.0277468	0.00117666
95	D23	118	90.3424	-0.0287605	0.00116051
95	D23	119	90.6004	-0.0282631	0.00110252
95	D23	120	90.8585	-0.0288287	0.00100267
95	D23	121	91.1166	-0.0285407	0.000883917
95	D23	122	91.3746	-0.0288348	0.000780912
95	D23	123	91.6327	-0.0288535	0.000722987
95	D23	124	91.8907	-0.02845	0.000719758
95	D23	125	92.1488	-0.0288364	0.000756557
95	D23	126	92.4068	-0.0294149	0.00080219
95	D23	127	92.6649	-0.0289237	0.00082518
95	D23	128	92.9229	-0.0294456	0.000809595
95	D23	129	93.181	-0.029622	0.000761132
95	D23	130	93.439	-0.0293963	0.000699512
95	D23	131	93.6971	-0.0296388	0.000642046
95	D23	132	93.9551	-0.028904	0.000590044
95	D23	133	94.2132	-0.0302233	0.00052868
95	D23	134	94.4712	-0.0300099	0.00044081
95	D23	135	94.7293	-0.0298475	0.000323546
96	D24	1	60.1504	1.46951	0.0635392
96	D24	2	60.4085	1.46633	0.0631827
96	D24	3	60.6665	1.4586	0.0625961
96	D24	4	60.9246	1.45142	0.0618534
96	D24	5	61.1826	1.44341	0.0611207
96	D24	6	61.4407	1.43632	0.0606121
96	D24	7	61.6987	1.43161	0.0605135
96	D24	8	61.9568	1.42412	0.0609199
96	D24	9	62.2148	1.41538	0.0617996
96	D24	10	62.4729	1.40803	0.0630089
96	D24	11	62.7309	1.40617	0.0643472
96	D24	12	62.989	1.39184	0.065642
96	D24	13	63.247	1.38414	0.0668195
96	D24	14	63.5051	1.37697	0.0679182
96	D24	15	63.7631	1.36822	0.0690252
96	D24	16	64.0212	1.36415	0.0701758
96	D24	17	64.2792	1.35132	0.0712798
96	D24	18	64.5373	1.34405	0.0721391
96	D24	19	64.7953	1.33757	0.0725448
96	D24	20	65.0534	1.32416	0.0723969
96	D24	21	65.3114	1.31384	0.0717703
96	D24	22	65.5695	1.31021	0.0708876
96	D24	23	65.8275	1.29795	0.070024
96	D24	24	66.0856	1.29369	0.0693929
96	D24	25	66.3436	1.28294	0.0690855
96	D24	26	66.6017	1.27668	0.0690684
96	D24	27	66.8597	1.26648	0.0692182
96	D24	28	67.1178	1.25836	0.0693776
96	D24	29	67.3758	1.2539	0.0694065
96	D24	30	67.6339	1.24126	0.0692402
96	D24	31	67.8919	1.23087	0.0689191
96	D24	32	68.15	1.22558	0.0685697
96	D24	33	68.408	1.21832	0.0683355
96	D24	34	68.6661	1.20938	0.0683017
96	D24	35	68.9241	1.20297	0.0684633
96	D24	36	69.1822	1.19134	0.0687516
96	D24	37	69.4402	1.18525	0.0690887
96	D24	38	69.6983	1.17653	0.069411
96	D24	39	69.9563	1.16841	0.0696621
96	D24	40	70.2144	1.15906	0.0697612
96	D24	41	70.4725	1.15248	0.0696039
96	D24	42	70.7305	1.14287	0.069104
96	D24	43	70.9886	1.1339	0.068265
96	D24	44	71.2466	1.1239	0.0672224
96	D24	45	71.5047	1.11804	0.0662151
96	D24	46	71.7627	1.10903	0.0654873
96	D24	47	72.0208	1.10432	0.0651843
96	D24	48	72.2788	1.09827	0.0653037
96	D24	49	72.5369	1.08575	0.0657267
96	D24	50	72.7949	1.0772	0.0662849
96	D24	51	73.053	1.07229	0.066803
96	D24	52	73.311	1.06667	0.0671116
96	D24	53	73.5691	1.05353	0.0670686
96	D24	54	73.8271	1.04604	0.066607
96	D24	55	74.0852	1.03732	0.0657889
96	D24	56	74.3432	1.02962	0.0648112
96	D24	57	74.6013	1.02409	0.0639398
96	D24	58	74.8593	1.01477	0.0634089
96	D24	59	75.1174	1.0086	0.0633358
96	D24	60	75.3754	1.0012	0.0637024
96	D24	61	75.6335	0.995261	0.0644091
96	D24	62	75.8915	0.984388	0.0653816
96	D24	63	76.1496	0.976459	0.0667028
96	D24	64	76.4076	0.969654	0.0687429
96	D24	65	76.6657	0.964018	0.0722663
96	D24	66	76.9237	0.950614	0.0784698
96	D24	67	77.1818	0.946007	0.0888688
96	D24	68	77.4398	0.937648	0.104941
96	D24	69	77.6979	0.929374	0.127535
96	D24	70	77.9559	0.917297	0.156264
96	D24	71	78.214	0.910162	0.189274
96	D24	72	78.472	0.881849	0.223797
96	D24	73	78.7301	0.841002	0.257462
96	D24	74	78.9881	0.792118	0.289801
96	D24	75	79.2462	0.749333	0.322953
96	D24	76	79.5042	0.7126	0.360775
96	D24	77	79.7623	0.691666	0.406435
96	D24	78	80.0203	0.663593	0.459541
96	D24	79	80.2784	0.616019	0.514458
96	D24	80	80.5365	0.532738	0.560977
96	D24	81	80.7945	0.426407	0.587341
96	D24	82	81.0526	0.318591	0.584344
96	D24	83	81.3106	0.219379	0.548716
96	D24	84	81.5687	0.136199	0.484345
96	D24	85	81.8267	0.0830994	0.400971
96	D24	86	82.0848	0.0578285	0.311076
96	D24	87	82.3428	0.0490284	0.226322
96	D24	88	82.6009	0.0473413	0.154866
96	D24	89	82.8589	0.0445365	0.100312
96	D24	90	83.117	0.0420177	0.0622405
96	D24	91	83.375	0.0405023	0.0377115
96	D24	92	83.6331	0.0392699	0.0229105
96	D24	93	83.8911	0.0381472	0.0143523
96	D24	94	84.1492	0.0372009	0.00944727
96	D24	95	84.4072	0.03729	0.00655197
96	D24	96	84.6653	0.0365314	0.00475452
96	D24	97	84.9233	0.0362607	0.00360361
96	D24	98	85.1814	0.035702	0.00288841
96	D24	99	85.4394	0.0363711	0.00249398
96	D24	100	85.6975	0.0358683	0.00232196
96	D24	101	85.9555	0.036149	0.00226363
96	D24	102	86.2136	0.0349938	0.00221222
96	D24	103	86.4716	0.0348397	0.00209401
96	D24	104	86.7297	0.0339144	0.00189071
96	D24	105	86.9877	0.0341054	0.00163299
96	D24	106	87.2458	0.0349673	0.00136881
96	D24	107	87.5038	0.0340836	0.00113043
96	D24	108	87.7619	0.0336354	0.000923512
96	D24	109	88.0199	0.0336261	0.000740441
96	D24	110	88.278	0.0338279	0.000579177
96	D24	111	88.536	0.0341068	0.000448996
96	D24	112	88.7941	0.0339301	0.000360782
96	D24	113	89.0521	0.0334842	0.000313717
96	D24	114	89.3102	0.0336134	0.000289759
96	D24	115	89.5683	0.0343184	0.00025915
96	D24	116	89.8263	0.0333884	0.000193868
96	D24	117	90.0844	0.0333928	8.41205e-05
96	D24	118	90.3424	0.0333292	-5.03398e-05
96	D24	119	90.6004	0.0336143	-0.00016392
96	D24	120	90.8585	0.0340865	-0.000207105
96	D24	121	91.1166	0.0342144	-0.000156166
96	D24	122	91.3746	0.0337022	-3.12597e-05
96	D24	123	91.6327	0.0340014	0.000110514
96	D24	124	91.8907	0.0335791	0.000203963
96	D24	125	92.1488	0.0334722	0.000209086
96	D24	126	92.4068	0.0333218	0.000129348
96	D24	127	92.6649	0.033481	5.74595e-06
96	D24	128	92.9229	0.0340259	-0.000107377
96	D24	129	93.181	0.0338866	-0.000168843
96	D24	130	93.439	0.0337814	-0.000164358
96	D24	131	93.6971	0.0333885	-0.000104025
96	D24	132	93.9551	0.034	-1.17292e-05
96	D24	133	94.2132	0.034083	8.41466e-05
96	D24	134	94.4712	0.0338725	0.000156625
96	D24	135	94.7293	0.032987	0.000186523
118	E22	1	60.1504	1.48761	0.0744786
118	E22	2	60.4085	1.48349	0.0759468
118	E22	3	60.6665	1.47151	0.0774031
118	E22	4	60.9246	1.46329	0.0783998
118	E22	5	61.1826	1.45236	0.0786368
118	E22	6	61.4407	1.44005	0.0780963
118	E22	7	61.6987	1.4304	0.0770342
118	E22	8	61.9568	1.42325	0.0758358
118	E22	9	62.2148	1.41548	0.0748301
118	E22	10	62.4729	1.40627	0.0741634
118	E22	11	62.7309	1.39769	0.0737988
118	E22	12	62.989	1.38785	0.0736177
118	E22	13	63.247	1.37831	0.0735301
118	E22	14	63.5051	1.36781	0.073519
118	E22	15	63.7631	1.36355	0.0736032
118	E22	16	64.0212	1.35138	0.073761
118	E22	17	64.2792	1.345	0.073899
118	E22	18	64.5373	1.33362	0.073888
118	E22	19	64.7953	1.32619	0.0736549
118	E22	20	65.0534	1.31452	0.0732443
118	E22	21	65.3114	1.30496	0.0728067
118	E22	22	65.5695	1.30005	0.072507
118	E22	23	65.8275	1.28999	0.0724199
118	E22	24	66.0856	1.28262	0.0724943
118	E22	25	66.3436	1.27453	0.0726013
118	E22	26	66.6017	1.25808	0.0726307
118	E22	27	66.8597	1.25576	0.0725476
118	E22	28	67.1178	1.24748	0.0723895
118	E22	29	67.3758	1.23599	0.072223
118	E22	30	67.6339	1.22757	0.0721028
118	E22	31	67.8919	1.21935	0.072061
118	E22	32	68.15	1.21093	0.0721069
118	E22	33	68.408	1.20135	0.0722277
118	E22	34	68.6661	1.19437	0.072389
118	E22	35	68.9241	1.18348	0.0725451
118	E22	36	69.1822	1.17611	0.0726465
118	E22	37	69.4402	1.16435	0.0726448
118	E22	38	69.6983	1.15931	0.0724841
118	E22	39	69.9563	1.14969	0.0721099
118	E22	40	70.2144	1.13823	0.0715004
118	E22	41	70.4725	1.13137	0.0707083
118	E22	42	70.7305	1.12025	0.0698738
118	E22	43	70.9886	1.11504	0.0691849
118	E22	44	71.2466	1.10478	0.068802
118	E22	45	71.5047	1.09972	0.0687931
118	E22	46	71.7627	1.0905	0.0691143
118	E22	47	72.0208	1.07866	0.0696365
118	E22	48	72.2788	1.07378	0.0701939
118	E22	49	72.5369	1.06485	0.0706288
118	E22	50	72.7949	1.05482	0.0708374
118	E22	51	73.053	1.04579	0.0708143
118	E22	52	73.311	1.037	0.0706684
118	E22	53	73.5691	1.02729	0.0705787
118	E22	54	73.8271	1.02042	0.0706872
118	E22	55	74.0852	1.01324	0.0709861
118	E22	56	74.3432	1.00589	0.071294
118	E22	57	74.6013	0.996544	0.0713637
118	E22	58	74.8593	0.980557	0.0710555
118	E22	59	75.1174	0.975567	0.0704482
118	E22	60	75.3754	0.96586	0.0697923
118	E22	61	75.6335	0.963755	0.0693391
118	E22	62	75.8915	0.951612	0.069181
118	E22	63	76.1496	0.944073	0.0692164
118	E22	64	76.4076	0.934713	0.0692498
118	E22	65	76.6657	0.923532	0.0691281
118	E22	66	76.9237	0.918801	0.0688139
118	E22	67	77.1818	0.909753	0.0683671
118	E22	68	77.4398	0.899399	0.0678824
118	E22	69	77.6979	0.894758	0.0674388
118	E22	70	77.9559	0.883741	0.0670995
118	E22	71	78.214	0.876378	0.066923
118	E22	72	78.472	0.86734	0.0669703
118	E22	73	78.7301	0.86171	0.0672881
118	E22	74	78.9881	0.854136	0.0678906
118	E22	75	79.2462	0.843498	0.0687683
118	E22	76	79.5042	0.83441	0.0699256
118	E22	77	79.7623	0.82935	0.0714438
118	E22	78	80.0203	0.818684	0.0735534
118	E22	79	80.2784	0.810301	0.0767315
118	E22	80	80.5365	0.798967	0.0818256
118	E22	81	80.7945	0.79337	0.0902033
118	E22	82	81.0526	0.782245	0.103889
118	E22	83	81.3106	0.773115	0.125577
118	E22	84	81.5687	0.759287	0.158343
118	E22	85	81.8267	0.747206	0.204868
118	E22	86	82.0848	0.731111	0.266146
118	E22	87	82.3428	0.708305	0.340017
118	E22	88	82.6009	0.673685	0.420201
118	E22	89	82.8589	0.619076	0.496626
118	E22	90	83.117	0.514379	0.557328
118	E22	91	83.375	0.405065	0.591494
118	E22	92	83.6331	0.301486	0.592493
118	E22	93	83.8911	0.208514	0.559721
118	E22	94	84.1492	0.130382	0.498588
118	E22	95	84.4072	0.0740472	0.418816
118	E22	96	84.6653	0.0421159	0.331803
118	E22	97	84.9233	0.0255652	0.247986
118	E22	98	85.1814	0.017316	0.174955
118	E22	99	85.4394	0.0144516	0.116678
118	E22	100	85.6975	0.0129969	0.073774
118	E22	101	85.9555	0.0117	0.0444888
118	E22	102	86.2136	0.0111807	0.0258832
118	E22	103	86.4716	0.0108391	0.0148437
118	E22	104	86.7297	0.0108279	0.00870757
118	E22	105	86.9877	0.00997444	0.00550247
118	E22	106	87.2458	0.00995061	0.00392075
118	E22	107	87.5038	0.00923482	0.00317093
118	E22	108	87.7619	0.00915991	0.00280992
118	E22	109	88.0199	0.00885522	0.00260715
118	E22	110	88.278	0.00855892	0.0024539
118	E22	111	88.536	0.00813716	0.00231099
118	E22	112	88.7941	0.00751947	0.00218004
118	E22	113	89.0521	0.00787562	0.00208333
118	E22	114	89.3102	0.00802492	0.00204449
118	E22	115	89.5683	0.00702959	0.00207192
118	E22	116	89.8263	0.00724149	0.00215165
118	E22	117	90.0844	0.00674859	0.00225225
118	E22	118	90.3424	0.00649111	0.00233719
118	E22	119	90.6004	0.00607494	0.00237716
118	E22	120	90.8585	0.00574115	0.00235769
118	E22	121	91.1166	0.00549931	0.00228182
118	E22	122	91.3746	0.00521919	0.00216883
118	E22	123	91.6327	0.00500101	0.00204883
118	E22	124	91.8907	0.00447006	0.00195246
118	E22	125	92.1488	0.00510714	0.00189814
118	E22	126	92.4068	0.00469384	0.00188369
118	E22	127	92.6649	0.00377265	0.00188907
118	E22	128	92.9229	0.00399716	0.00188935
118	E22	129	93.181	0.00342025	0.00186749
118	E22	130	93.439	0.00345285	0.00181581
118	E22	131	93.6971	0.00370212	0.00172633
118	E22	132	93.9551	0.00295619	0.00158284
118	E22	133	94.2132	0.00267421	0.00136713
118	E22	134	94.4712	0.00197177	0.00107752
118	E22	135	94.7293	0.00256801	0.000742874
119	E23	1	60.1504	1.5125	0.0756032
119	E23	2	60.4085	1.50472	0.0762884
119	E23	3	60.6665	1.49615	0.0769161
119	E23	4	60.9246	1.48761	0.0772726
119	E23	5	61.1826	1.47682	0.0772281
119	E23	6	61.4407	1.46906	0.0768
119	E23	7	61.6987	1.45873	0.0761716
119	E23	8	61.9568	1.44592	0.0756288
119	E23	9	62.2148	1.44266	0.0754397
119	E23	10	62.4729	1.432	0.0757235
119	E23	11	62.7309	1.4277	0.0763741
119	E23	12	62.989	1.41366	0.0771089
119	E23	13	63.247	1.40364	0.0775959
119	E23	14	63.5051	1.39394	0.0775991
119	E23	15	63.7631	1.38808	0.0770646
119	E23	16	64.0212	1.37319	0.0761219
119	E23	17	64.2792	1.36598	0.0750229
119	E23	18	64.5373	1.35987	0.0740333
119	E23	19	64.7953	1.34627	0.0733322
119	E23	20	65.0534	1.34372	0.0729507
119	E23	21	65.3114	1.33501	0.0727977
119	E23	22	65.5695	1.3221	0.072763
119	E23	23	65.8275	1.31303	0.0728185
119	E23	24	66.0856	1.30441	0.0730303
119	E23	25	66.3436	1.29855	0.0734714
119	E23	26	66.6017	1.29106	0.0741082
119	E23	27	66.8597	1.2812	0.0747715
119	E23	28	67.1178	1.27033	0.0752481
119	E23	29	67.3758	1.25884	0.0754235
119	E23	30	67.6339	1.25317	0.0753601
119	E23	31	67.8919	1.2411	0.0752474
119	E23	32	68.15	1.23432	0.0752618
119	E23	33	68.408	1.22737	0.0754379
119	E23	34	68.6661	1.21583	0.07564
119	E23	35	68.9241	1.20983	0.0756526
119	E23	36	69.1822	1.1943	0.0753233
119	E23	37	69.4402	1.18716	0.0746547
119	E23	38	69.6983	1.17903	0.0738019
119	E23	39	69.9563	1.17224	0.0729823
119	E23	40	70.2144	1.1612	0.0723912
119	E23	41	70.4725	1.15336	0.0721463
119	E23	42	70.7305	1.14494	0.072286
119	E23	43	70.9886	1.13758	0.072773
119	E23	44	71.2466	1.12562	0.0734924
119	E23	45	71.5047	1.12276	0.0742581
119	E23	46	71.7627	1.11014	0.0748534
119	E23	47	72.0208	1.09746	0.0751012
119	E23	48	72.2788	1.09311	0.074933
119	E23	49	72.5369	1.08054	0.0744148
119	E23	50	72.7949	1.07263	0.0737069
119	E23	51	73.053	1.06388	0.0729878
119	E23	52	73.311	1.05542	0.0723749
119	E23	53	73.5691	1.04765	0.0718869
119	E23	54	73.8271	1.03968	0.0714752
119	E23	55	74.0852	1.02911	0.071092
119	E23	56	74.3432	1.01796	0.0707536
119	E23	57	74.6013	1.01558	0.0705451
119	E23	58	74.8593	1.00155	0.070568
119	E23	59	75.1174	0.998348	0.070866
119	E23	60	75.3754	0.988622	0.0713874
119	E23	61	75.6335	0.976678	0.0720051
119	E23	62	75.8915	0.971016	0.0725761
119	E23	63	76.1496	0.962303	0.0729949
119	E23	64	76.4076	0.95015	0.0732154
119	E23	65	76.6657	0.943419	0.0732378
119	E23	66	76.9237	0.935672	0.0730789
119	E23	67	77.1818	0.925099	0.0727554
119	E23	68	77.4398	0.917493	0.0722859
119	E23	69	77.6979	0.905918	0.0717087
119	E23	70	77.9559	0.900489	0.071089
119	E23	71	78.214	0.891821	0.0705098
119	E23	72	78.472	0.880526	0.0700509
119	E23	73	78.7301	0.876399	0.0697737
119	E23	74	78.9881	0.865662	0.0697216
119	E23	75	79.2462	0.856655	0.0699428
119	E23	76	79.5042	0.851914	0.0705288
119	E23	77	79.7623	0.839917	0.071661
119	E23	78	80.0203	0.831822	0.0736669
119	E23	79	80.2784	0.825414	0.0770885
119	E23	80	80.5365	0.81663	0.082788
119	E23	81	80.7945	0.805674	0.0921008
119	E23	82	81.0526	0.797319	0.106996
119	E23	83	81.3106	0.786815	0.13011
119	E23	84	81.5687	0.77518	0.16445
119	E23	85	81.8267	0.757608	0.212572
119	E23	86	82.0848	0.745203	0.275277
119	E23	87	82.3428	0.721488	0.35018
119	E23	88	82.6009	0.685432	0.430864
119	E23	89	82.8589	0.618412	0.507287
119	E23	90	83.117	0.524594	0.56768
119	E23	91	83.375	0.416807	0.601451
119	E23	92	83.6331	0.311891	0.602064
119	E23	93	83.8911	0.216284	0.568832
119	E23	94	84.1492	0.138743	0.506993
119	E23	95	84.4072	0.0809088	0.426158
119	E23	96	84.6653	0.0484373	0.337768
119	E23	97	84.9233	0.0326228	0.252438
119	E23	98	85.1814	0.0243877	0.177979
119	E23	99	85.4394	0.0219083	0.118521
119	E23	100	85.6975	0.0196738	0.0747542
119	E23	101	85.9555	0.0186437	0.0449165
119	E23	102	86.2136	0.0182844	0.0260174
119	E23	103	86.4716	0.0183394	0.0148731
119	E23	104	86.7297	0.0180838	0.00874052
119	E23	105	86.9877	0.0175604	0.00556614
119	E23	106	87.2458	0.0166822	0.00397936
119	E23	107	87.5038	0.0159741	0.00316641
119	E23	108	87.7619	0.0161658	0.00270901
119	E23	109	88.0199	0.0162261	0.00242715
119	E23	110	88.278	0.0162033	0.00225024
119	E23	111	88.536	0.0157741	0.00213753
119	E23	112	88.7941	0.0150108	0.0020545
119	E23	113	89.0521	0.0144213	0.00198482
119	E23	114	89.3102	0.0148553	0.00194138
119	E23	115	89.5683	0.0151527	0.00195152
119	E23	116	89.8263	0.0146446	0.00202413
119	E23	117	90.0844	0.0144579	0.00212734
119	E23	118	90.3424	0.0135233	0.00219878
119	E23	119	90.6004	0.0133902	0.00218243
119	E23	120	90.8585	0.0129267	0.0020637
119	E23	121	91.1166	0.0127113	0.0018774
119	E23	122	91.3746	0.0134605	0.00168504
119	E23	123	91.6327	0.0125561	0.00153988
119	E23	124	91.8907	0.0127354	0.00146302
119	E23	125	92.1488	0.0123594	0.00144166
119	E23	126	92.4068	0.0121355	0.0014445
119	E23	127	92.6649	0.0123333	0.00144162
119	E23	128	92.9229	0.011712	0.00141762
119	E23	129	93.181	0.0112612	0.00137311
119	E23	130	93.439	0.0117792	0.0013151
119	E23	131	93.6971	0.0117354	0.00124339
119	E23	132	93.9551	0.01134	0.00114367
119	E23	133	94.2132	0.0106937	0.000995587
119	E23	134	94.4712	0.0106332	0.000791229
119	E23	135	94.7293	0.0108986	0.000548914
120	E24	1	60.1504	1.46633	0.0710804
120	E24	2	60.4085	1.45796	0.0712755
120	E24	3	60.6665	1.45796	0.0715166
120	E24	4	60.9246	1.44392	0.0717324
120	E24	5	61.1826	1.43268	0.0718888
120	E24	6	61.4407	1.42928	0.0720041
120	E24	7	61.6987	1.41801	0.0721212
120	E24	8	61.9568	1.41043	0.0722688
120	E24	9	62.2148	1.4015	0.0724432
120	E24	10	62.4729	1.39178	0.0726332
120	E24	11	62.7309	1.38473	0.0728429
120	E24	12	62.989	1.37145	0.0730988
120	E24	13	63.247	1.368	0.0734194
120	E24	14	63.5051	1.35779	0.0737832
120	E24	15	63.7631	1.34763	0.0741238
120	E24	16	64.0212	1.33907	0.0743576
120	E24	17	64.2792	1.32878	0.0744136
120	E24	18	64.5373	1.3211	0.074241
120	E24	19	64.7953	1.31101	0.073808
120	E24	20	65.0534	1.30496	0.0731195
120	E24	21	65.3114	1.29307	0.0722567
120	E24	22	65.5695	1.28184	0.0714015
120	E24	23	65.8275	1.27542	0.0707889
120	E24	24	66.0856	1.26837	0.0705987
120	E24	25	66.3436	1.2642	0.0708565
120	E24	26	66.6017	1.2507	0.0714285
120	E24	27	66.8597	1.24277	0.0721157
120	E24	28	67.1178	1.23187	0.0727598
120	E24	29	67.3758	1.22442	0.0732813
120	E24	30	67.6339	1.21783	0.0736339
120	E24	31	67.8919	1.20706	0.0737533
120	E24	32	68.15	1.19741	0.0735754
120	E24	33	68.408	1.19024	0.0731116
120	E24	34	68.6661	1.17614	0.0725068
120	E24	35	68.9241	1.16695	0.0719926
120	E24	36	69.1822	1.16717	0.0717522
120	E24	37	69.4402	1.15544	0.0717973
120	E24	38	69.6983	1.146	0.0719667
120	E24	39	69.9563	1.13453	0.0720477
120	E24	40	70.2144	1.12818	0.0719316
120	E24	41	70.4725	1.11679	0.0716668
120	E24	42	70.7305	1.1078	0.0713959
120	E24	43	70.9886	1.10545	0.0712194
120	E24	44	71.2466	1.09374	0.0711183
120	E24	45	71.5047	1.08312	0.0709791
120	E24	46	71.7627	1.07459	0.0706925
120	E24	47	72.0208	1.06655	0.0702444
120	E24	48	72.2788	1.05913	0.0697352
120	E24	49	72.5369	1.04765	0.0693186
120	E24	50	72.7949	1.04201	0.0691081
120	E24	51	73.053	1.03391	0.0691033
120	E24	52	73.311	1.0271	0.0691851
120	E24	53	73.5691	1.01556	0.069187
120	E24	54	73.8271	1.00664	0.0689944
120	E24	55	74.0852	0.998975	0.0686189
120	E24	56	74.3432	0.990664	0.0681923
120	E24	57	74.6013	0.981748	0.0678913
120	E24	58	74.8593	0.976299	0.0678468
120	E24	59	75.1174	0.966914	0.0680881
120	E24	60	75.3754	0.958604	0.0685485
120	E24	61	75.6335	0.948092	0.0691075
120	E24	62	75.8915	0.944334	0.0696353
120	E24	63	76.1496	0.931133	0.0700127
120	E24	64	76.4076	0.924	0.070138
120	E24	65	76.6657	0.917125	0.069935
120	E24	66	76.9237	0.906096	0.0693843
120	E24	67	77.1818	0.898475	0.068556
120	E24	68	77.4398	0.887709	0.067618
120	E24	69	77.6979	0.881837	0.0667928
120	E24	70	77.9559	0.875686	0.0662791
120	E24	71	78.214	0.866298	0.0661789
120	E24	72	78.472	0.859409	0.066483
120	E24	73	78.7301	0.851042	0.0671066
120	E24	74	78.9881	0.840286	0.0679556
120	E24	75	79.2462	0.835836	0.0689763
[truncated: 1,275 more rows]
