# Supplementary material for: Transcriptomic identification of HBx-associated hub genes in hepatocellular carcinoma
Source: PeerJ. 2021 Dec 22;9:e12697. doi: 10.7717/peerj.12697 (PMC8710059; doi:10.7717/peerj.12697)
Supplement: Supplemental Information 13 [file peerj-09-12697-s013.xlsx]

## Sheet: Sample Setup
Block Type	384-Well Block
Calibration Background is expired	Yes
Calibration Background performed on	10-12-2018 11:47:46 PDT
Calibration FAM is expired	Yes
Calibration FAM performed on	10-23-2018 10:23:19 PDT
Calibration MELTDOCTOR is expired	Yes
Calibration MELTDOCTOR performed on	09-26-2017 21:22:46 PDT
Calibration NED is expired	Yes
Calibration NED performed on	10-23-2018 10:33:14 PDT
Calibration ROI is expired	Yes
Calibration ROI performed on	10-12-2018 09:37:21 PDT
Calibration ROX is expired	Yes
Calibration ROX performed on	10-23-2018 10:07:21 PDT
Calibration SYBR is expired	Yes
Calibration SYBR performed on	10-23-2018 09:57:53 PDT
Calibration TAMRA is expired	Yes
Calibration TAMRA performed on	10-23-2018 10:45:25 PDT
Calibration Uniformity is expired	Yes
Calibration Uniformity performed on	10-12-2018 10:06:59 PDT
Calibration VIC is expired	Yes
Calibration VIC performed on	10-23-2018 10:54:25 PDT
Chemistry	SYBR_GREEN
Date Created	02-02-2021 13:40:30 PST
Experiment File Name	D:\NZZ\2021-02-02 120723.eds
Experiment Name	2021-02-02 120723
Experiment Run End Time	02-02-2021 06:46:44 PST
Experiment Type	Comparative Cт (ΔΔCт)
Instrument Name	285880860
Instrument Serial Number	285880860
Instrument Type	QuantStudio 12K Flex
Passive Reference	ROX
Quantification Cycle Method	Ct
Signal Smoothing On	true
Stage/ Cycle where Analysis is performed	Stage 2, Step 2
Well	Well Position	Sample Name	Sample Color	Biogroup Name	Biogroup Color	Target Name	Target Color	Task	Reporter	Quencher	Quantity	Comments
1	A1	w1-vec	RGB(176,23,31)			mCYC	RGB(176,23,31)	UNKNOWN	SYBR	None
2	A2	w1-vec	RGB(176,23,31)			mCYC	RGB(176,23,31)	UNKNOWN	SYBR	None
3	A3	w1-vec	RGB(176,23,31)			mCYC	RGB(176,23,31)	UNKNOWN	SYBR	None
4	A4	w8-vec	RGB(0,0,255)			mCYC	RGB(176,23,31)	UNKNOWN	SYBR	None
5	A5	w8-vec	RGB(0,0,255)			mCYC	RGB(176,23,31)	UNKNOWN	SYBR	None
6	A6	w8-vec	RGB(0,0,255)			mCYC	RGB(176,23,31)	UNKNOWN	SYBR	None
7	A7	w4-HBx	RGB(0,139,69)			mCYC	RGB(176,23,31)	UNKNOWN	SYBR	None
8	A8	w4-HBx	RGB(0,139,69)			mCYC	RGB(176,23,31)	UNKNOWN	SYBR	None
9	A9	w4-HBx	RGB(0,139,69)			mCYC	RGB(176,23,31)	UNKNOWN	SYBR	None
10	A10	w7-HBx	RGB(255,127,0)			mCYC	RGB(176,23,31)	UNKNOWN	SYBR	None
11	A11	w7-HBx	RGB(255,127,0)			mCYC	RGB(176,23,31)	UNKNOWN	SYBR	None
12	A12	w7-HBx	RGB(255,127,0)			mCYC	RGB(176,23,31)	UNKNOWN	SYBR	None
13	A13	w1-vec	RGB(176,23,31)			mRGS5	RGB(0,0,255)	UNKNOWN	SYBR	None
14	A14	w1-vec	RGB(176,23,31)			mRGS5	RGB(0,0,255)	UNKNOWN	SYBR	None
15	A15	w1-vec	RGB(176,23,31)			mRGS5	RGB(0,0,255)	UNKNOWN	SYBR	None
16	A16	w8-vec	RGB(0,0,255)			mRGS5	RGB(0,0,255)	UNKNOWN	SYBR	None
17	A17	w8-vec	RGB(0,0,255)			mRGS5	RGB(0,0,255)	UNKNOWN	SYBR	None
18	A18	w8-vec	RGB(0,0,255)			mRGS5	RGB(0,0,255)	UNKNOWN	SYBR	None
19	A19	w4-HBx	RGB(0,139,69)			mRGS5	RGB(0,0,255)	UNKNOWN	SYBR	None
20	A20	w4-HBx	RGB(0,139,69)			mRGS5	RGB(0,0,255)	UNKNOWN	SYBR	None
21	A21	w4-HBx	RGB(0,139,69)			mRGS5	RGB(0,0,255)	UNKNOWN	SYBR	None
22	A22	w7-HBx	RGB(255,127,0)			mRGS5	RGB(0,0,255)	UNKNOWN	SYBR	None
23	A23	w7-HBx	RGB(255,127,0)			mRGS5	RGB(0,0,255)	UNKNOWN	SYBR	None
24	A24	w7-HBx	RGB(255,127,0)			mRGS5	RGB(0,0,255)	UNKNOWN	SYBR	None
25	B1	w1-vec	RGB(176,23,31)			mLPAR5	RGB(0,0,255)	UNKNOWN	SYBR	None
26	B2	w1-vec	RGB(176,23,31)			mLPAR5	RGB(0,0,255)	UNKNOWN	SYBR	None
27	B3	w1-vec	RGB(176,23,31)			mLPAR5	RGB(0,0,255)	UNKNOWN	SYBR	None
28	B4	w8-vec	RGB(0,0,255)			mLPAR5	RGB(0,0,255)	UNKNOWN	SYBR	None
29	B5	w8-vec	RGB(0,0,255)			mLPAR5	RGB(0,0,255)	UNKNOWN	SYBR	None
30	B6	w8-vec	RGB(0,0,255)			mLPAR5	RGB(0,0,255)	UNKNOWN	SYBR	None
31	B7	w4-HBx	RGB(0,139,69)			mLPAR5	RGB(0,0,255)	UNKNOWN	SYBR	None
32	B8	w4-HBx	RGB(0,139,69)			mLPAR5	RGB(0,0,255)	UNKNOWN	SYBR	None
33	B9	w4-HBx	RGB(0,139,69)			mLPAR5	RGB(0,0,255)	UNKNOWN	SYBR	None
34	B10	w7-HBx	RGB(255,127,0)			mLPAR5	RGB(0,0,255)	UNKNOWN	SYBR	None
35	B11	w7-HBx	RGB(255,127,0)			mLPAR5	RGB(0,0,255)	UNKNOWN	SYBR	None
36	B12	w7-HBx	RGB(255,127,0)			mLPAR5	RGB(0,0,255)	UNKNOWN	SYBR	None
37	B13	w1-vec	RGB(176,23,31)			mPALM2	RGB(0,139,69)	UNKNOWN	SYBR	None
38	B14	w1-vec	RGB(176,23,31)			mPALM2	RGB(0,139,69)	UNKNOWN	SYBR	None
39	B15	w1-vec	RGB(176,23,31)			mPALM2	RGB(0,139,69)	UNKNOWN	SYBR	None
40	B16	w8-vec	RGB(0,0,255)			mPALM2	RGB(0,139,69)	UNKNOWN	SYBR	None
41	B17	w8-vec	RGB(0,0,255)			mPALM2	RGB(0,139,69)	UNKNOWN	SYBR	None
42	B18	w8-vec	RGB(0,0,255)			mPALM2	RGB(0,139,69)	UNKNOWN	SYBR	None
43	B19	w4-HBx	RGB(0,139,69)			mPALM2	RGB(0,139,69)	UNKNOWN	SYBR	None
44	B20	w4-HBx	RGB(0,139,69)			mPALM2	RGB(0,139,69)	UNKNOWN	SYBR	None
45	B21	w4-HBx	RGB(0,139,69)			mPALM2	RGB(0,139,69)	UNKNOWN	SYBR	None
46	B22	w7-HBx	RGB(255,127,0)			mPALM2	RGB(0,139,69)	UNKNOWN	SYBR	None
47	B23	w7-HBx	RGB(255,127,0)			mPALM2	RGB(0,139,69)	UNKNOWN	SYBR	None
48	B24	w7-HBx	RGB(255,127,0)			mPALM2	RGB(0,139,69)	UNKNOWN	SYBR	None
49	C1	w1-vec	RGB(176,23,31)			mTAT	RGB(0,139,69)	UNKNOWN	SYBR	None
50	C2	w1-vec	RGB(176,23,31)			mTAT	RGB(0,139,69)	UNKNOWN	SYBR	None
51	C3	w1-vec	RGB(176,23,31)			mTAT	RGB(0,139,69)	UNKNOWN	SYBR	None
52	C4	w8-vec	RGB(0,0,255)			mTAT	RGB(0,139,69)	UNKNOWN	SYBR	None
53	C5	w8-vec	RGB(0,0,255)			mTAT	RGB(0,139,69)	UNKNOWN	SYBR	None
54	C6	w8-vec	RGB(0,0,255)			mTAT	RGB(0,139,69)	UNKNOWN	SYBR	None
55	C7	w4-HBx	RGB(0,139,69)			mTAT	RGB(0,139,69)	UNKNOWN	SYBR	None
56	C8	w4-HBx	RGB(0,139,69)			mTAT	RGB(0,139,69)	UNKNOWN	SYBR	None
57	C9	w4-HBx	RGB(0,139,69)			mTAT	RGB(0,139,69)	UNKNOWN	SYBR	None
58	C10	w7-HBx	RGB(255,127,0)			mTAT	RGB(0,139,69)	UNKNOWN	SYBR	None
59	C11	w7-HBx	RGB(255,127,0)			mTAT	RGB(0,139,69)	UNKNOWN	SYBR	None
60	C12	w7-HBx	RGB(255,127,0)			mTAT	RGB(0,139,69)	UNKNOWN	SYBR	None
61	C13	w1-vec	RGB(176,23,31)			mARG1	RGB(238,238,0)	UNKNOWN	SYBR	None
62	C14	w1-vec	RGB(176,23,31)			mARG1	RGB(238,238,0)	UNKNOWN	SYBR	None
63	C15	w1-vec	RGB(176,23,31)			mARG1	RGB(238,238,0)	UNKNOWN	SYBR	None
64	C16	w8-vec	RGB(0,0,255)			mARG1	RGB(238,238,0)	UNKNOWN	SYBR	None
65	C17	w8-vec	RGB(0,0,255)			mARG1	RGB(238,238,0)	UNKNOWN	SYBR	None
66	C18	w8-vec	RGB(0,0,255)			mARG1	RGB(238,238,0)	UNKNOWN	SYBR	None
67	C19	w4-HBx	RGB(0,139,69)			mARG1	RGB(238,238,0)	UNKNOWN	SYBR	None
68	C20	w4-HBx	RGB(0,139,69)			mARG1	RGB(238,238,0)	UNKNOWN	SYBR	None
69	C21	w4-HBx	RGB(0,139,69)			mARG1	RGB(238,238,0)	UNKNOWN	SYBR	None
70	C22	w7-HBx	RGB(255,127,0)			mARG1	RGB(238,238,0)	UNKNOWN	SYBR	None
71	C23	w7-HBx	RGB(255,127,0)			mARG1	RGB(238,238,0)	UNKNOWN	SYBR	None
72	C24	w7-HBx	RGB(255,127,0)			mARG1	RGB(238,238,0)	UNKNOWN	SYBR	None
73	D1	w1-vec	RGB(176,23,31)			mADORA1	RGB(238,238,0)	UNKNOWN	SYBR	None
74	D2	w1-vec	RGB(176,23,31)			mADORA1	RGB(238,238,0)	UNKNOWN	SYBR	None
75	D3	w1-vec	RGB(176,23,31)			mADORA1	RGB(238,238,0)	UNKNOWN	SYBR	None
76	D4	w8-vec	RGB(0,0,255)			mADORA1	RGB(238,238,0)	UNKNOWN	SYBR	None
77	D5	w8-vec	RGB(0,0,255)			mADORA1	RGB(238,238,0)	UNKNOWN	SYBR	None
78	D6	w8-vec	RGB(0,0,255)			mADORA1	RGB(238,238,0)	UNKNOWN	SYBR	None
79	D7	w4-HBx	RGB(0,139,69)			mADORA1	RGB(238,238,0)	UNKNOWN	SYBR	None
80	D8	w4-HBx	RGB(0,139,69)			mADORA1	RGB(238,238,0)	UNKNOWN	SYBR	None
81	D9	w4-HBx	RGB(0,139,69)			mADORA1	RGB(238,238,0)	UNKNOWN	SYBR	None
82	D10	w7-HBx	RGB(255,127,0)			mADORA1	RGB(238,238,0)	UNKNOWN	SYBR	None
83	D11	w7-HBx	RGB(255,127,0)			mADORA1	RGB(238,238,0)	UNKNOWN	SYBR	None
84	D12	w7-HBx	RGB(255,127,0)			mADORA1	RGB(238,238,0)	UNKNOWN	SYBR	None
85	D13	w1-vec	RGB(176,23,31)			mC8A	RGB(139,137,112)	UNKNOWN	SYBR	None
86	D14	w1-vec	RGB(176,23,31)			mC8A	RGB(139,137,112)	UNKNOWN	SYBR	None
87	D15	w1-vec	RGB(176,23,31)			mC8A	RGB(139,137,112)	UNKNOWN	SYBR	None
88	D16	w8-vec	RGB(0,0,255)			mC8A	RGB(139,137,112)	UNKNOWN	SYBR	None
89	D17	w8-vec	RGB(0,0,255)			mC8A	RGB(139,137,112)	UNKNOWN	SYBR	None
90	D18	w8-vec	RGB(0,0,255)			mC8A	RGB(139,137,112)	UNKNOWN	SYBR	None
91	D19	w4-HBx	RGB(0,139,69)			mC8A	RGB(139,137,112)	UNKNOWN	SYBR	None
92	D20	w4-HBx	RGB(0,139,69)			mC8A	RGB(139,137,112)	UNKNOWN	SYBR	None
93	D21	w4-HBx	RGB(0,139,69)			mC8A	RGB(139,137,112)	UNKNOWN	SYBR	None
94	D22	w7-HBx	RGB(255,127,0)			mC8A	RGB(139,137,112)	UNKNOWN	SYBR	None
95	D23	w7-HBx	RGB(255,127,0)			mC8A	RGB(139,137,112)	UNKNOWN	SYBR	None
96	D24	w7-HBx	RGB(255,127,0)			mC8A	RGB(139,137,112)	UNKNOWN	SYBR	None
97	E1	w1-vec	RGB(176,23,31)			mGNRH2	RGB(139,137,112)	UNKNOWN	SYBR	None
98	E2	w1-vec	RGB(176,23,31)			mGNRH2	RGB(139,137,112)	UNKNOWN	SYBR	None
99	E3	w1-vec	RGB(176,23,31)			mGNRH2	RGB(139,137,112)	UNKNOWN	SYBR	None
100	E4	w8-vec	RGB(0,0,255)			mGNRH2	RGB(139,137,112)	UNKNOWN	SYBR	None
101	E5	w8-vec	RGB(0,0,255)			mGNRH2	RGB(139,137,112)	UNKNOWN	SYBR	None
102	E6	w8-vec	RGB(0,0,255)			mGNRH2	RGB(139,137,112)	UNKNOWN	SYBR	None
103	E7	w4-HBx	RGB(0,139,69)			mGNRH2	RGB(139,137,112)	UNKNOWN	SYBR	None
104	E8	w4-HBx	RGB(0,139,69)			mGNRH2	RGB(139,137,112)	UNKNOWN	SYBR	None
105	E9	w4-HBx	RGB(0,139,69)			mGNRH2	RGB(139,137,112)	UNKNOWN	SYBR	None
106	E10	w7-HBx	RGB(255,127,0)			mGNRH2	RGB(139,137,112)	UNKNOWN	SYBR	None
107	E11	w7-HBx	RGB(255,127,0)			mGNRH2	RGB(139,137,112)	UNKNOWN	SYBR	None
108	E12	w7-HBx	RGB(255,127,0)			mGNRH2	RGB(139,137,112)	UNKNOWN	SYBR	None
109	E13	w1-vec	RGB(176,23,31)			mCPEB3	RGB(238,121,66)	UNKNOWN	SYBR	None
110	E14	w1-vec	RGB(176,23,31)			mCPEB3	RGB(238,121,66)	UNKNOWN	SYBR	None
111	E15	w1-vec	RGB(176,23,31)			mCPEB3	RGB(238,121,66)	UNKNOWN	SYBR	None
112	E16	w8-vec	RGB(0,0,255)			mCPEB3	RGB(238,121,66)	UNKNOWN	SYBR	None
113	E17	w8-vec	RGB(0,0,255)			mCPEB3	RGB(238,121,66)	UNKNOWN	SYBR	None
114	E18	w8-vec	RGB(0,0,255)			mCPEB3	RGB(238,121,66)	UNKNOWN	SYBR	None
115	E19	w4-HBx	RGB(0,139,69)			mCPEB3	RGB(238,121,66)	UNKNOWN	SYBR	None
116	E20	w4-HBx	RGB(0,139,69)			mCPEB3	RGB(238,121,66)	UNKNOWN	SYBR	None
117	E21	w4-HBx	RGB(0,139,69)			mCPEB3	RGB(238,121,66)	UNKNOWN	SYBR	None
118	E22	w7-HBx	RGB(255,127,0)			mCPEB3	RGB(238,121,66)	UNKNOWN	SYBR	None
119	E23	w7-HBx	RGB(255,127,0)			mCPEB3	RGB(238,121,66)	UNKNOWN	SYBR	None
120	E24	w7-HBx	RGB(255,127,0)			mCPEB3	RGB(238,121,66)	UNKNOWN	SYBR	None
121	F1	w1-vec	RGB(176,23,31)			mGPR39	RGB(238,121,66)	UNKNOWN	SYBR	None
122	F2	w1-vec	RGB(176,23,31)			mGPR39	RGB(238,121,66)	UNKNOWN	SYBR	None
123	F3	w1-vec	RGB(176,23,31)			mGPR39	RGB(238,121,66)	UNKNOWN	SYBR	None
124	F4	w8-vec	RGB(0,0,255)			mGPR39	RGB(238,121,66)	UNKNOWN	SYBR	None
125	F5	w8-vec	RGB(0,0,255)			mGPR39	RGB(238,121,66)	UNKNOWN	SYBR	None
126	F6	w8-vec	RGB(0,0,255)			mGPR39	RGB(238,121,66)	UNKNOWN	SYBR	None
127	F7	w4-HBx	RGB(0,139,69)			mGPR39	RGB(238,121,66)	UNKNOWN	SYBR	None
128	F8	w4-HBx	RGB(0,139,69)			mGPR39	RGB(238,121,66)	UNKNOWN	SYBR	None
129	F9	w4-HBx	RGB(0,139,69)			mGPR39	RGB(238,121,66)	UNKNOWN	SYBR	None
130	F10	w7-HBx	RGB(255,127,0)			mGPR39	RGB(238,121,66)	UNKNOWN	SYBR	None
131	F11	w7-HBx	RGB(255,127,0)			mGPR39	RGB(238,121,66)	UNKNOWN	SYBR	None
132	F12	w7-HBx	RGB(255,127,0)			mGPR39	RGB(238,121,66)	UNKNOWN	SYBR	None
133	F13	w1-vec	RGB(176,23,31)			mCTSD	RGB(142,56,142)	UNKNOWN	SYBR	None
134	F14	w1-vec	RGB(176,23,31)			mCTSD	RGB(142,56,142)	UNKNOWN	SYBR	None
135	F15	w1-vec	RGB(176,23,31)			mCTSD	RGB(142,56,142)	UNKNOWN	SYBR	None
136	F16	w8-vec	RGB(0,0,255)			mCTSD	RGB(142,56,142)	UNKNOWN	SYBR	None
137	F17	w8-vec	RGB(0,0,255)			mCTSD	RGB(142,56,142)	UNKNOWN	SYBR	None
138	F18	w8-vec	RGB(0,0,255)			mCTSD	RGB(142,56,142)	UNKNOWN	SYBR	None
139	F19	w4-HBx	RGB(0,139,69)			mCTSD	RGB(142,56,142)	UNKNOWN	SYBR	None
140	F20	w4-HBx	RGB(0,139,69)			mCTSD	RGB(142,56,142)	UNKNOWN	SYBR	None
141	F21	w4-HBx	RGB(0,139,69)			mCTSD	RGB(142,56,142)	UNKNOWN	SYBR	None
142	F22	w7-HBx	RGB(255,127,0)			mCTSD	RGB(142,56,142)	UNKNOWN	SYBR	None
143	F23	w7-HBx	RGB(255,127,0)			mCTSD	RGB(142,56,142)	UNKNOWN	SYBR	None
144	F24	w7-HBx	RGB(255,127,0)			mCTSD	RGB(142,56,142)	UNKNOWN	SYBR	None
145	G1	w1-vec	RGB(176,23,31)			mMAGEA6	RGB(142,56,142)	UNKNOWN	SYBR	None
146	G2	w1-vec	RGB(176,23,31)			mMAGEA6	RGB(142,56,142)	UNKNOWN	SYBR	None
147	G3	w1-vec	RGB(176,23,31)			mMAGEA6	RGB(142,56,142)	UNKNOWN	SYBR	None
148	G4	w8-vec	RGB(0,0,255)			mMAGEA6	RGB(142,56,142)	UNKNOWN	SYBR	None
149	G5	w8-vec	RGB(0,0,255)			mMAGEA6	RGB(142,56,142)	UNKNOWN	SYBR	None
150	G6	w8-vec	RGB(0,0,255)			mMAGEA6	RGB(142,56,142)	UNKNOWN	SYBR	None
151	G7	w4-HBx	RGB(0,139,69)			mMAGEA6	RGB(142,56,142)	UNKNOWN	SYBR	None
152	G8	w4-HBx	RGB(0,139,69)			mMAGEA6	RGB(142,56,142)	UNKNOWN	SYBR	None
153	G9	w4-HBx	RGB(0,139,69)			mMAGEA6	RGB(142,56,142)	UNKNOWN	SYBR	None
154	G10	w7-HBx	RGB(255,127,0)			mMAGEA6	RGB(142,56,142)	UNKNOWN	SYBR	None
155	G11	w7-HBx	RGB(255,127,0)			mMAGEA6	RGB(142,56,142)	UNKNOWN	SYBR	None
156	G12	w7-HBx	RGB(255,127,0)			mMAGEA6	RGB(142,56,142)	UNKNOWN	SYBR	None
157	G13	w1-vec	RGB(176,23,31)			mKNG1	RGB(198,113,113)	UNKNOWN	SYBR	None
158	G14	w1-vec	RGB(176,23,31)			mKNG1	RGB(198,113,113)	UNKNOWN	SYBR	None
159	G15	w1-vec	RGB(176,23,31)			mKNG1	RGB(198,113,113)	UNKNOWN	SYBR	None
160	G16	w8-vec	RGB(0,0,255)			mKNG1	RGB(198,113,113)	UNKNOWN	SYBR	None
161	G17	w8-vec	RGB(0,0,255)			mKNG1	RGB(198,113,113)	UNKNOWN	SYBR	None
162	G18	w8-vec	RGB(0,0,255)			mKNG1	RGB(198,113,113)	UNKNOWN	SYBR	None
163	G19	w4-HBx	RGB(0,139,69)			mKNG1	RGB(198,113,113)	UNKNOWN	SYBR	None
164	G20	w4-HBx	RGB(0,139,69)			mKNG1	RGB(198,113,113)	UNKNOWN	SYBR	None
165	G21	w4-HBx	RGB(0,139,69)			mKNG1	RGB(198,113,113)	UNKNOWN	SYBR	None
166	G22	w7-HBx	RGB(255,127,0)			mKNG1	RGB(198,113,113)	UNKNOWN	SYBR	None
167	G23	w7-HBx	RGB(255,127,0)			mKNG1	RGB(198,113,113)	UNKNOWN	SYBR	None
168	G24	w7-HBx	RGB(255,127,0)			mKNG1	RGB(198,113,113)	UNKNOWN	SYBR	None
169	H1	w1-vec	RGB(176,23,31)			mGNAL	RGB(198,113,113)	UNKNOWN	SYBR	None
170	H2	w1-vec	RGB(176,23,31)			mGNAL	RGB(198,113,113)	UNKNOWN	SYBR	None
171	H3	w1-vec	RGB(176,23,31)			mGNAL	RGB(198,113,113)	UNKNOWN	SYBR	None
172	H4	w8-vec	RGB(0,0,255)			mGNAL	RGB(198,113,113)	UNKNOWN	SYBR	None
173	H5	w8-vec	RGB(0,0,255)			mGNAL	RGB(198,113,113)	UNKNOWN	SYBR	None
174	H6	w8-vec	RGB(0,0,255)			mGNAL	RGB(198,113,113)	UNKNOWN	SYBR	None
175	H7	w4-HBx	RGB(0,139,69)			mGNAL	RGB(198,113,113)	UNKNOWN	SYBR	None
176	H8	w4-HBx	RGB(0,139,69)			mGNAL	RGB(198,113,113)	UNKNOWN	SYBR	None
177	H9	w4-HBx	RGB(0,139,69)			mGNAL	RGB(198,113,113)	UNKNOWN	SYBR	None
178	H10	w7-HBx	RGB(255,127,0)			mGNAL	RGB(198,113,113)	UNKNOWN	SYBR	None
179	H11	w7-HBx	RGB(255,127,0)			mGNAL	RGB(198,113,113)	UNKNOWN	SYBR	None
180	H12	w7-HBx	RGB(255,127,0)			mGNAL	RGB(198,113,113)	UNKNOWN	SYBR	None
181	H13	w1-vec	RGB(176,23,31)			mTACR1	RGB(0,245,255)	UNKNOWN	SYBR	None
182	H14	w1-vec	RGB(176,23,31)			mTACR1	RGB(0,245,255)	UNKNOWN	SYBR	None
183	H15	w1-vec	RGB(176,23,31)			mTACR1	RGB(0,245,255)	UNKNOWN	SYBR	None
184	H16	w8-vec	RGB(0,0,255)			mTACR1	RGB(0,245,255)	UNKNOWN	SYBR	None
185	H17	w8-vec	RGB(0,0,255)			mTACR1	RGB(0,245,255)	UNKNOWN	SYBR	None
186	H18	w8-vec	RGB(0,0,255)			mTACR1	RGB(0,245,255)	UNKNOWN	SYBR	None
187	H19	w4-HBx	RGB(0,139,69)			mTACR1	RGB(0,245,255)	UNKNOWN	SYBR	None
188	H20	w4-HBx	RGB(0,139,69)			mTACR1	RGB(0,245,255)	UNKNOWN	SYBR	None
189	H21	w4-HBx	RGB(0,139,69)			mTACR1	RGB(0,245,255)	UNKNOWN	SYBR	None
190	H22	w7-HBx	RGB(255,127,0)			mTACR1	RGB(0,245,255)	UNKNOWN	SYBR	None
191	H23	w7-HBx	RGB(255,127,0)			mTACR1	RGB(0,245,255)	UNKNOWN	SYBR	None
192	H24	w7-HBx	RGB(255,127,0)			mTACR1	RGB(0,245,255)	UNKNOWN	SYBR	None
193	I1	w1-vec	RGB(176,23,31)			mFAM110C	RGB(0,245,255)	UNKNOWN	SYBR	None
194	I2	w1-vec	RGB(176,23,31)			mFAM110C	RGB(0,245,255)	UNKNOWN	SYBR	None
195	I3	w1-vec	RGB(176,23,31)			mFAM110C	RGB(0,245,255)	UNKNOWN	SYBR	None
196	I4	w8-vec	RGB(0,0,255)			mFAM110C	RGB(0,245,255)	UNKNOWN	SYBR	None
197	I5	w8-vec	RGB(0,0,255)			mFAM110C	RGB(0,245,255)	UNKNOWN	SYBR	None
198	I6	w8-vec	RGB(0,0,255)			mFAM110C	RGB(0,245,255)	UNKNOWN	SYBR	None
199	I7	w4-HBx	RGB(0,139,69)			mFAM110C	RGB(0,245,255)	UNKNOWN	SYBR	None
200	I8	w4-HBx	RGB(0,139,69)			mFAM110C	RGB(0,245,255)	UNKNOWN	SYBR	None
201	I9	w4-HBx	RGB(0,139,69)			mFAM110C	RGB(0,245,255)	UNKNOWN	SYBR	None
202	I10	w7-HBx	RGB(255,127,0)			mFAM110C	RGB(0,245,255)	UNKNOWN	SYBR	None
203	I11	w7-HBx	RGB(255,127,0)			mFAM110C	RGB(0,245,255)	UNKNOWN	SYBR	None
204	I12	w7-HBx	RGB(255,127,0)			mFAM110C	RGB(0,245,255)	UNKNOWN	SYBR	None
205	I13	w1-vec	RGB(176,23,31)			HBx	RGB(238,220,130)	UNKNOWN	SYBR	None
206	I14	w1-vec	RGB(176,23,31)			HBx	RGB(238,220,130)	UNKNOWN	SYBR	None
207	I15	w1-vec	RGB(176,23,31)			HBx	RGB(238,220,130)	UNKNOWN	SYBR	None
208	I16	w8-vec	RGB(0,0,255)			HBx	RGB(238,220,130)	UNKNOWN	SYBR	None
209	I17	w8-vec	RGB(0,0,255)			HBx	RGB(238,220,130)	UNKNOWN	SYBR	None
210	I18	w8-vec	RGB(0,0,255)			HBx	RGB(238,220,130)	UNKNOWN	SYBR	None
211	I19	w4-HBx	RGB(0,139,69)			HBx	RGB(238,220,130)	UNKNOWN	SYBR	None
212	I20	w4-HBx	RGB(0,139,69)			HBx	RGB(238,220,130)	UNKNOWN	SYBR	None
213	I21	w4-HBx	RGB(0,139,69)			HBx	RGB(238,220,130)	UNKNOWN	SYBR	None
214	I22	w7-HBx	RGB(255,127,0)			HBx	RGB(238,220,130)	UNKNOWN	SYBR	None
215	I23	w7-HBx	RGB(255,127,0)			HBx	RGB(238,220,130)	UNKNOWN	SYBR	None
216	I24	w7-HBx	RGB(255,127,0)			HBx	RGB(238,220,130)	UNKNOWN	SYBR	None
217	J1	w1-vec	RGB(176,23,31)			mKISS1R	RGB(238,220,130)	UNKNOWN	SYBR	None
218	J2	w1-vec	RGB(176,23,31)			mKISS1R	RGB(238,220,130)	UNKNOWN	SYBR	None
219	J3	w1-vec	RGB(176,23,31)			mKISS1R	RGB(238,220,130)	UNKNOWN	SYBR	None
220	J4	w8-vec	RGB(0,0,255)			mKISS1R	RGB(238,220,130)	UNKNOWN	SYBR	None
221	J5	w8-vec	RGB(0,0,255)			mKISS1R	RGB(238,220,130)	UNKNOWN	SYBR	None
222	J6	w8-vec	RGB(0,0,255)			mKISS1R	RGB(238,220,130)	UNKNOWN	SYBR	None
223	J7	w4-HBx	RGB(0,139,69)			mKISS1R	RGB(238,220,130)	UNKNOWN	SYBR	None
224	J8	w4-HBx	RGB(0,139,69)			mKISS1R	RGB(238,220,130)	UNKNOWN	SYBR	None
225	J9	w4-HBx	RGB(0,139,69)			mKISS1R	RGB(238,220,130)	UNKNOWN	SYBR	None
226	J10	w7-HBx	RGB(255,127,0)			mKISS1R	RGB(238,220,130)	UNKNOWN	SYBR	None
227	J11	w7-HBx	RGB(255,127,0)			mKISS1R	RGB(238,220,130)	UNKNOWN	SYBR	None
228	J12	w7-HBx	RGB(255,127,0)			mKISS1R	RGB(238,220,130)	UNKNOWN	SYBR	None
229	J13
230	J14
231	J15
232	J16
233	J17
234	J18
235	J19
236	J20
237	J21
238	J22
239	J23
240	J24
241	K1	w1-vec	RGB(176,23,31)			mITGAM	RGB(255,127,0)	UNKNOWN	SYBR	None
242	K2	w1-vec	RGB(176,23,31)			mITGAM	RGB(255,127,0)	UNKNOWN	SYBR	None
243	K3	w1-vec	RGB(176,23,31)			mITGAM	RGB(255,127,0)	UNKNOWN	SYBR	None
244	K4	w8-vec	RGB(0,0,255)			mITGAM	RGB(255,127,0)	UNKNOWN	SYBR	None
245	K5	w8-vec	RGB(0,0,255)			mITGAM	RGB(255,127,0)	UNKNOWN	SYBR	None
246	K6	w8-vec	RGB(0,0,255)			mITGAM	RGB(255,127,0)	UNKNOWN	SYBR	None
247	K7	w4-HBx	RGB(0,139,69)			mITGAM	RGB(255,127,0)	UNKNOWN	SYBR	None
248	K8	w4-HBx	RGB(0,139,69)			mITGAM	RGB(255,127,0)	UNKNOWN	SYBR	None
249	K9	w4-HBx	RGB(0,139,69)			mITGAM	RGB(255,127,0)	UNKNOWN	SYBR	None
250	K10	w7-HBx	RGB(255,127,0)			mITGAM	RGB(255,127,0)	UNKNOWN	SYBR	None
251	K11	w7-HBx	RGB(255,127,0)			mITGAM	RGB(255,127,0)	UNKNOWN	SYBR	None
252	K12	w7-HBx	RGB(255,127,0)			mITGAM	RGB(255,127,0)	UNKNOWN	SYBR	None
253	K13
254	K14
255	K15
256	K16
257	K17
258	K18
259	K19
260	K20
261	K21
262	K22
263	K23
264	K24
265	L1	w1-vec	RGB(176,23,31)			mHIST1H2BH	RGB(142,142,56)	UNKNOWN	SYBR	None
266	L2	w1-vec	RGB(176,23,31)			mHIST1H2BH	RGB(142,142,56)	UNKNOWN	SYBR	None
267	L3	w1-vec	RGB(176,23,31)			mHIST1H2BH	RGB(142,142,56)	UNKNOWN	SYBR	None
268	L4	w8-vec	RGB(0,0,255)			mHIST1H2BH	RGB(142,142,56)	UNKNOWN	SYBR	None
269	L5	w8-vec	RGB(0,0,255)			mHIST1H2BH	RGB(142,142,56)	UNKNOWN	SYBR	None
270	L6	w8-vec	RGB(0,0,255)			mHIST1H2BH	RGB(142,142,56)	UNKNOWN	SYBR	None
271	L7	w4-HBx	RGB(0,139,69)			mHIST1H2BH	RGB(142,142,56)	UNKNOWN	SYBR	None
272	L8	w4-HBx	RGB(0,139,69)			mHIST1H2BH	RGB(142,142,56)	UNKNOWN	SYBR	None
273	L9	w4-HBx	RGB(0,139,69)			mHIST1H2BH	RGB(142,142,56)	UNKNOWN	SYBR	None
274	L10	w7-HBx	RGB(255,127,0)			mHIST1H2BH	RGB(142,142,56)	UNKNOWN	SYBR	None
275	L11	w7-HBx	RGB(255,127,0)			mHIST1H2BH	RGB(142,142,56)	UNKNOWN	SYBR	None
276	L12	w7-HBx	RGB(255,127,0)			mHIST1H2BH	RGB(142,142,56)	UNKNOWN	SYBR	None
277	L13
278	L14
279	L15
280	L16
281	L17
282	L18
283	L19
284	L20
285	L21
286	L22
287	L23
288	L24
289	M1	w1-vec	RGB(176,23,31)			mANGPTL6	RGB(238,44,44)	UNKNOWN	SYBR	None
290	M2	w1-vec	RGB(176,23,31)			mANGPTL6	RGB(238,44,44)	UNKNOWN	SYBR	None
291	M3	w1-vec	RGB(176,23,31)			mANGPTL6	RGB(238,44,44)	UNKNOWN	SYBR	None
292	M4	w8-vec	RGB(0,0,255)			mANGPTL6	RGB(238,44,44)	UNKNOWN	SYBR	None
293	M5	w8-vec	RGB(0,0,255)			mANGPTL6	RGB(238,44,44)	UNKNOWN	SYBR	None
294	M6	w8-vec	RGB(0,0,255)			mANGPTL6	RGB(238,44,44)	UNKNOWN	SYBR	None
295	M7	w4-HBx	RGB(0,139,69)			mANGPTL6	RGB(238,44,44)	UNKNOWN	SYBR	None
296	M8	w4-HBx	RGB(0,139,69)			mANGPTL6	RGB(238,44,44)	UNKNOWN	SYBR	None
297	M9	w4-HBx	RGB(0,139,69)			mANGPTL6	RGB(238,44,44)	UNKNOWN	SYBR	None
298	M10	w7-HBx	RGB(255,127,0)			mANGPTL6	RGB(238,44,44)	UNKNOWN	SYBR	None
299	M11	w7-HBx	RGB(255,127,0)			mANGPTL6	RGB(238,44,44)	UNKNOWN	SYBR	None
300	M12	w7-HBx	RGB(255,127,0)			mANGPTL6	RGB(238,44,44)	UNKNOWN	SYBR	None
301	M13
302	M14
303	M15
304	M16
305	M17
306	M18
307	M19
308	M20
309	M21
310	M22
311	M23
312	M24
313	N1	w1-vec	RGB(176,23,31)			mALDOB	RGB(51,161,201)	UNKNOWN	SYBR	None
314	N2	w1-vec	RGB(176,23,31)			mALDOB	RGB(51,161,201)	UNKNOWN	SYBR	None
315	N3	w1-vec	RGB(176,23,31)			mALDOB	RGB(51,161,201)	UNKNOWN	SYBR	None
316	N4	w8-vec	RGB(0,0,255)			mALDOB	RGB(51,161,201)	UNKNOWN	SYBR	None
317	N5	w8-vec	RGB(0,0,255)			mALDOB	RGB(51,161,201)	UNKNOWN	SYBR	None
318	N6	w8-vec	RGB(0,0,255)			mALDOB	RGB(51,161,201)	UNKNOWN	SYBR	None
319	N7	w4-HBx	RGB(0,139,69)			mALDOB	RGB(51,161,201)	UNKNOWN	SYBR	None
320	N8	w4-HBx	RGB(0,139,69)			mALDOB	RGB(51,161,201)	UNKNOWN	SYBR	None
321	N9	w4-HBx	RGB(0,139,69)			mALDOB	RGB(51,161,201)	UNKNOWN	SYBR	None
322	N10	w7-HBx	RGB(255,127,0)			mALDOB	RGB(51,161,201)	UNKNOWN	SYBR	None
323	N11	w7-HBx	RGB(255,127,0)			mALDOB	RGB(51,161,201)	UNKNOWN	SYBR	None
324	N12	w7-HBx	RGB(255,127,0)			mALDOB	RGB(51,161,201)	UNKNOWN	SYBR	None
325	N13
326	N14
327	N15
328	N16
329	N17
330	N18
331	N19
332	N20
333	N21
334	N22
335	N23
336	N24
337	O1	w1-vec	RGB(176,23,31)			mALDH8A1	RGB(238,18,137)	UNKNOWN	SYBR	None
338	O2	w1-vec	RGB(176,23,31)			mALDH8A1	RGB(238,18,137)	UNKNOWN	SYBR	None
339	O3	w1-vec	RGB(176,23,31)			mALDH8A1	RGB(238,18,137)	UNKNOWN	SYBR	None
340	O4	w8-vec	RGB(0,0,255)			mALDH8A1	RGB(238,18,137)	UNKNOWN	SYBR	None
341	O5	w8-vec	RGB(0,0,255)			mALDH8A1	RGB(238,18,137)	UNKNOWN	SYBR	None
342	O6	w8-vec	RGB(0,0,255)			mALDH8A1	RGB(238,18,137)	UNKNOWN	SYBR	None
343	O7	w4-HBx	RGB(0,139,69)			mALDH8A1	RGB(238,18,137)	UNKNOWN	SYBR	None
344	O8	w4-HBx	RGB(0,139,69)			mALDH8A1	RGB(238,18,137)	UNKNOWN	SYBR	None
345	O9	w4-HBx	RGB(0,139,69)			mALDH8A1	RGB(238,18,137)	UNKNOWN	SYBR	None
346	O10	w7-HBx	RGB(255,127,0)			mALDH8A1	RGB(238,18,137)	UNKNOWN	SYBR	None
347	O11	w7-HBx	RGB(255,127,0)			mALDH8A1	RGB(238,18,137)	UNKNOWN	SYBR	None
348	O12	w7-HBx	RGB(255,127,0)			mALDH8A1	RGB(238,18,137)	UNKNOWN	SYBR	None
349	O13
350	O14
351	O15
352	O16
353	O17
354	O18
355	O19
356	O20
357	O21
358	O22
359	O23
360	O24
361	P1	w1-vec	RGB(176,23,31)			mSERPINE1	RGB(176,23,31)	UNKNOWN	SYBR	None
362	P2	w1-vec	RGB(176,23,31)			mSERPINE1	RGB(176,23,31)	UNKNOWN	SYBR	None
363	P3	w1-vec	RGB(176,23,31)			mSERPINE1	RGB(176,23,31)	UNKNOWN	SYBR	None
364	P4	w8-vec	RGB(0,0,255)			mSERPINE1	RGB(176,23,31)	UNKNOWN	SYBR	None
365	P5	w8-vec	RGB(0,0,255)			mSERPINE1	RGB(176,23,31)	UNKNOWN	SYBR	None
366	P6	w8-vec	RGB(0,0,255)			mSERPINE1	RGB(176,23,31)	UNKNOWN	SYBR	None
367	P7	w4-HBx	RGB(0,139,69)			mSERPINE1	RGB(176,23,31)	UNKNOWN	SYBR	None
368	P8	w4-HBx	RGB(0,139,69)			mSERPINE1	RGB(176,23,31)	UNKNOWN	SYBR	None
369	P9	w4-HBx	RGB(0,139,69)			mSERPINE1	RGB(176,23,31)	UNKNOWN	SYBR	None
370	P10	w7-HBx	RGB(255,127,0)			mSERPINE1	RGB(176,23,31)	UNKNOWN	SYBR	None
371	P11	w7-HBx	RGB(255,127,0)			mSERPINE1	RGB(176,23,31)	UNKNOWN	SYBR	None
372	P12	w7-HBx	RGB(255,127,0)			mSERPINE1	RGB(176,23,31)	UNKNOWN	SYBR	None
373	P13
374	P14
375	P15
376	P16
377	P17
378	P18
379	P19
380	P20
381	P21
382	P22
383	P23
384	P24

## Sheet: Amplification Data
Block Type	384-Well Block
Calibration Background is expired	Yes
Calibration Background performed on	10-12-2018 11:47:46 PDT
Calibration FAM is expired	Yes
Calibration FAM performed on	10-23-2018 10:23:19 PDT
Calibration MELTDOCTOR is expired	Yes
Calibration MELTDOCTOR performed on	09-26-2017 21:22:46 PDT
Calibration NED is expired	Yes
Calibration NED performed on	10-23-2018 10:33:14 PDT
Calibration ROI is expired	Yes
Calibration ROI performed on	10-12-2018 09:37:21 PDT
Calibration ROX is expired	Yes
Calibration ROX performed on	10-23-2018 10:07:21 PDT
Calibration SYBR is expired	Yes
Calibration SYBR performed on	10-23-2018 09:57:53 PDT
Calibration TAMRA is expired	Yes
Calibration TAMRA performed on	10-23-2018 10:45:25 PDT
Calibration Uniformity is expired	Yes
Calibration Uniformity performed on	10-12-2018 10:06:59 PDT
Calibration VIC is expired	Yes
Calibration VIC performed on	10-23-2018 10:54:25 PDT
Chemistry	SYBR_GREEN
Date Created	02-02-2021 13:40:31 PST
Experiment File Name	D:\NZZ\2021-02-02 120723.eds
Experiment Name	2021-02-02 120723
Experiment Run End Time	02-02-2021 06:46:44 PST
Experiment Type	Comparative Cт (ΔΔCт)
Instrument Name	285880860
Instrument Serial Number	285880860
Instrument Type	QuantStudio 12K Flex
Passive Reference	ROX
Quantification Cycle Method	Ct
Signal Smoothing On	true
Stage/ Cycle where Analysis is performed	Stage 2, Step 2
Well	Cycle	Target Name	Rn	Delta Rn
1	1	mCYC	0.198204	-4.86337e-05
1	2	mCYC	0.201562	0.000856914
1	3	mCYC	0.206131	0.00297305
1	4	mCYC	0.20814	0.00253014
1	5	mCYC	0.209042	0.000979326
1	6	mCYC	0.209466	-0.00104845
1	7	mCYC	0.210552	-0.00241482
1	8	mCYC	0.212646	-0.00277377
1	9	mCYC	0.215253	-0.00261902
1	10	mCYC	0.218272	-0.00205238
1	11	mCYC	0.221374	-0.00140251
1	12	mCYC	0.224992	-0.000237367
1	13	mCYC	0.228783	0.00110195
1	14	mCYC	0.235098	0.00496385
1	15	mCYC	0.242953	0.0103673
1	16	mCYC	0.259863	0.0248244
1	17	mCYC	0.288692	0.0512015
1	18	mCYC	0.340198	0.100255
1	19	mCYC	0.42866	0.186264
1	20	mCYC	0.570433	0.325585
1	21	mCYC	0.776668	0.529368
1	22	mCYC	1.02957	0.779814
1	23	mCYC	1.28743	1.03523
1	24	mCYC	1.4979	1.24324
1	25	mCYC	1.64582	1.38871
1	26	mCYC	1.74542	1.48586
1	27	mCYC	1.80849	1.54648
1	28	mCYC	1.85128	1.58681
1	29	mCYC	1.87443	1.60751
1	30	mCYC	1.88887	1.6195
1	31	mCYC	1.90243	1.63061
1	32	mCYC	1.90723	1.63296
1	33	mCYC	1.9136	1.63687
1	34	mCYC	1.91124	1.63206
1	35	mCYC	1.90196	1.62032
1	36	mCYC	1.89446	1.61037
1	37	mCYC	1.88931	1.60277
1	38	mCYC	1.8872	1.59821
1	39	mCYC	1.88321	1.59176
1	40	mCYC	1.87994	1.58604
2	1	mCYC	0.160929	6.7209e-05
2	2	mCYC	0.16264	-0.000332373
2	3	mCYC	0.16538	0.000297104
2	4	mCYC	0.168118	0.000923437
2	5	mCYC	0.170242	0.000937347
2	6	mCYC	0.171313	-0.000102985
2	7	mCYC	0.17277	-0.000756453
2	8	mCYC	0.174764	-0.000873911
2	9	mCYC	0.176869	-0.00087976
2	10	mCYC	0.178593	-0.00126602
2	11	mCYC	0.181001	-0.000969212
2	12	mCYC	0.184185	0.000103933
2	13	mCYC	0.188778	0.00258652
2	14	mCYC	0.194303	0.00600084
2	15	mCYC	0.203897	0.0134837
2	16	mCYC	0.220223	0.0276989
2	17	mCYC	0.24854	0.0539045
2	18	mCYC	0.298308	0.101563
2	19	mCYC	0.386185	0.187329
2	20	mCYC	0.53011	0.329143
2	21	mCYC	0.738111	0.535033
2	22	mCYC	0.990794	0.785604
2	23	mCYC	1.24449	1.03719
2	24	mCYC	1.45376	1.24435
2	25	mCYC	1.60154	1.39002
2	26	mCYC	1.69627	1.48263
2	27	mCYC	1.75612	1.54038
2	28	mCYC	1.79616	1.5783
2	29	mCYC	1.81872	1.59876
2	30	mCYC	1.83265	1.61058
2	31	mCYC	1.84199	1.6178
2	32	mCYC	1.84888	1.62258
2	33	mCYC	1.85111	1.6227
2	34	mCYC	1.84876	1.61824
2	35	mCYC	1.84589	1.61326
2	36	mCYC	1.84086	1.60612
2	37	mCYC	1.83484	1.59799
2	38	mCYC	1.82785	1.58889
2	39	mCYC	1.82438	1.58331
2	40	mCYC	1.8166	1.57342
3	1	mCYC	0.154997	0.000604359
3	2	mCYC	0.157465	0.00125632
3	3	mCYC	0.159623	0.0015977
3	4	mCYC	0.161174	0.00133227
3	5	mCYC	0.162134	0.000474945
3	6	mCYC	0.162731	-0.000744207
3	7	mCYC	0.163776	-0.00151531
3	8	mCYC	0.165405	-0.00170299
3	9	mCYC	0.167824	-0.00110057
3	10	mCYC	0.169304	-0.00143663
3	11	mCYC	0.172003	-0.000554304
3	12	mCYC	0.175244	0.000870054
3	13	mCYC	0.17897	0.00277904
3	14	mCYC	0.185556	0.00754911
3	15	mCYC	0.195331	0.0155073
3	16	mCYC	0.211741	0.0301014
3	17	mCYC	0.240767	0.0573103
3	18	mCYC	0.29148	0.106207
3	19	mCYC	0.379126	0.192036
3	20	mCYC	0.523185	0.334279
3	21	mCYC	0.731732	0.54101
3	22	mCYC	0.988319	0.79578
3	23	mCYC	1.24317	1.04881
3	24	mCYC	1.45062	1.25445
3	25	mCYC	1.59445	1.39646
3	26	mCYC	1.68637	1.48656
3	27	mCYC	1.74568	1.54406
3	28	mCYC	1.78439	1.58096
3	29	mCYC	1.80869	1.60344
3	30	mCYC	1.8235	1.61643
3	31	mCYC	1.83048	1.6216
3	32	mCYC	1.83363	1.62293
3	33	mCYC	1.83621	1.62369
3	34	mCYC	1.83289	1.61856
3	35	mCYC	1.82485	1.6087
3	36	mCYC	1.8215	1.60353
3	37	mCYC	1.81825	1.59847
3	38	mCYC	1.81332	1.59172
3	39	mCYC	1.80794	1.58452
3	40	mCYC	1.80315	1.57792
4	1	mCYC	0.148817	0.00125671
4	2	mCYC	0.150389	0.000800338
4	3	mCYC	0.153281	0.00166415
4	4	mCYC	0.154945	0.00130039
4	5	mCYC	0.155988	0.000315766
4	6	mCYC	0.157175	-0.000526041
4	7	mCYC	0.158479	-0.00125007
4	8	mCYC	0.160034	-0.00172331
4	9	mCYC	0.162141	-0.0016435
4	10	mCYC	0.164615	-0.00119844
4	11	mCYC	0.166965	-0.000875899
4	12	mCYC	0.170718	0.000849287
4	13	mCYC	0.174985	0.00308767
4	14	mCYC	0.181247	0.007322
4	15	mCYC	0.192718	0.0167642
4	16	mCYC	0.212028	0.0340467
4	17	mCYC	0.247209	0.0671998
4	18	mCYC	0.309058	0.12702
4	19	mCYC	0.413001	0.228936
4	20	mCYC	0.577487	0.391394
4	21	mCYC	0.804393	0.616271
4	22	mCYC	1.06078	0.870631
4	23	mCYC	1.30003	1.10785
4	24	mCYC	1.48517	1.29096
4	25	mCYC	1.6069	1.41066
4	26	mCYC	1.68006	1.4818
4	27	mCYC	1.72567	1.52538
4	28	mCYC	1.75569	1.55338
4	29	mCYC	1.77196	1.56761
4	30	mCYC	1.77856	1.57218
4	31	mCYC	1.78001	1.57161
4	32	mCYC	1.77919	1.56876
4	33	mCYC	1.77573	1.56327
4	34	mCYC	1.77179	1.55731
4	35	mCYC	1.76558	1.54906
4	36	mCYC	1.7608	1.54226
4	37	mCYC	1.75752	1.53695
4	38	mCYC	1.75244	1.52985
4	39	mCYC	1.74779	1.52316
4	40	mCYC	1.74531	1.51865
5	1	mCYC	0.171945	0.00131218
5	2	mCYC	0.172945	0.000319529
5	3	mCYC	0.174519	-9.89193e-05
5	4	mCYC	0.176678	6.69368e-05
5	5	mCYC	0.179028	0.000424034
5	6	mCYC	0.180439	-0.000156807
5	7	mCYC	0.182435	-0.000153671
5	8	mCYC	0.184877	0.000295054
5	9	mCYC	0.186793	0.000218543
5	10	mCYC	0.188098	-0.000468842
5	11	mCYC	0.189688	-0.000871286
5	12	mCYC	0.192366	-0.000186184
5	13	mCYC	0.195476	0.000931141
5	14	mCYC	0.201372	0.00483448
5	15	mCYC	0.210965	0.0124348
5	16	mCYC	0.227464	0.0269407
5	17	mCYC	0.257528	0.0550124
5	18	mCYC	0.311731	0.107222
5	19	mCYC	0.404471	0.197969
5	20	mCYC	0.551882	0.343388
5	21	mCYC	0.758928	0.548442
5	22	mCYC	1.00041	0.787927
5	23	mCYC	1.23425	1.01978
5	24	mCYC	1.42365	1.20718
5	25	mCYC	1.55846	1.34
5	26	mCYC	1.64528	1.42483
5	27	mCYC	1.7006	1.47816
5	28	mCYC	1.73839	1.51395
5	29	mCYC	1.76308	1.53665
5	30	mCYC	1.77668	1.54826
5	31	mCYC	1.78472	1.55431
5	32	mCYC	1.78427	1.55186
5	33	mCYC	1.78414	1.54974
5	34	mCYC	1.78624	1.54985
5	35	mCYC	1.78417	1.54578
5	36	mCYC	1.78063	1.54025
5	37	mCYC	1.77811	1.53574
5	38	mCYC	1.77339	1.52903
5	39	mCYC	1.76973	1.52338
5	40	mCYC	1.76535	1.517
6	1	mCYC	0.0713711	0.00417106
6	2	mCYC	0.0719004	0.00256171
6	3	mCYC	0.0730582	0.00158098
6	4	mCYC	0.0745921	0.00097627
6	5	mCYC	0.0759541	0.000199735
6	6	mCYC	0.0772626	-0.000630422
6	7	mCYC	0.0790245	-0.00100714
6	8	mCYC	0.0810284	-0.0011418
6	9	mCYC	0.082933	-0.00137573
6	10	mCYC	0.0852926	-0.00115472
6	11	mCYC	0.0877625	-0.000823403
6	12	mCYC	0.0913091	0.00058455
6	13	mCYC	0.0956548	0.00279167
6	14	mCYC	0.10247	0.00746783
6	15	mCYC	0.113593	0.0164522
6	16	mCYC	0.133609	0.0343297
6	17	mCYC	0.169587	0.0681695
6	18	mCYC	0.231863	0.128307
6	19	mCYC	0.33875	0.233056
6	20	mCYC	0.507709	0.399875
6	21	mCYC	0.739175	0.629203
6	22	mCYC	1.00406	0.891952
6	23	mCYC	1.24986	1.13562
6	24	mCYC	1.43625	1.31987
6	25	mCYC	1.56244	1.44391
6	26	mCYC	1.64129	1.52063
6	27	mCYC	1.68531	1.5625
6	28	mCYC	1.71338	1.58844
6	29	mCYC	1.72714	1.60006
6	30	mCYC	1.73546	1.60624
6	31	mCYC	1.73625	1.60489
6	32	mCYC	1.73377	1.60028
6	33	mCYC	1.73266	1.59703
6	34	mCYC	1.73128	1.59351
6	35	mCYC	1.72468	1.58477
6	36	mCYC	1.71898	1.57693
6	37	mCYC	1.71364	1.56945
6	38	mCYC	1.70839	1.56206
6	39	mCYC	1.7047	1.55623
6	40	mCYC	1.69976	1.54915
7	1	mCYC	0.117104	0.00342153
7	2	mCYC	0.118013	0.00218962
7	3	mCYC	0.119534	0.00156819
7	4	mCYC	0.120931	0.000823344
7	5	mCYC	0.122386	0.000137316
7	6	mCYC	0.124221	-0.00016976
7	7	mCYC	0.125918	-0.000614173
7	8	mCYC	0.127246	-0.00142822
7	9	mCYC	0.129272	-0.00154311
7	10	mCYC	0.131482	-0.00147537
7	11	mCYC	0.133996	-0.00110249
7	12	mCYC	0.137868	0.000627463
7	13	mCYC	0.142559	0.00317681
7	14	mCYC	0.149115	0.00759125
7	15	mCYC	0.159696	0.0160302
7	16	mCYC	0.178079	0.0322721
7	17	mCYC	0.210863	0.0629137
7	18	mCYC	0.268568	0.118477
7	19	mCYC	0.367702	0.21547
7	20	mCYC	0.527445	0.373071
7	21	mCYC	0.75081	0.594294
7	22	mCYC	1.01161	0.852955
7	23	mCYC	1.26247	1.10167
7	24	mCYC	1.45538	1.29244
7	25	mCYC	1.58823	1.42315
7	26	mCYC	1.67152	1.5043
7	27	mCYC	1.71938	1.55002
7	28	mCYC	1.74879	1.57728
7	29	mCYC	1.76522	1.59157
7	30	mCYC	1.77253	1.59674
7	31	mCYC	1.77727	1.59934
7	32	mCYC	1.77675	1.59667
7	33	mCYC	1.77183	1.58961
7	34	mCYC	1.76733	1.58297
7	35	mCYC	1.7601	1.5736
7	36	mCYC	1.75494	1.5663
7	37	mCYC	1.74976	1.55898
7	38	mCYC	1.74715	1.55423
7	39	mCYC	1.74299	1.54792
7	40	mCYC	1.73932	1.54211
8	1	mCYC	0.0894322	0.00202958
8	2	mCYC	0.0904558	0.000974203
8	3	mCYC	0.0924471	0.000886517
8	4	mCYC	0.0939694	0.000329809
8	5	mCYC	0.0958164	9.78273e-05
8	6	mCYC	0.0979683	0.000170671
8	7	mCYC	0.0998706	-6.01966e-06
8	8	mCYC	0.101777	-0.000178494
8	9	mCYC	0.10236	-0.00167445
8	10	mCYC	0.104592	-0.00152164
8	11	mCYC	0.107207	-0.000985624
8	12	mCYC	0.110623	0.000351792
8	13	mCYC	0.11488	0.00252961
8	14	mCYC	0.12127	0.0068406
8	15	mCYC	0.13179	0.0152814
8	16	mCYC	0.150791	0.0322038
8	17	mCYC	0.184461	0.0637944
8	18	mCYC	0.243017	0.120272
8	19	mCYC	0.343312	0.218487
8	20	mCYC	0.504509	0.377605
8	21	mCYC	0.7289	0.599918
8	22	mCYC	0.989106	0.858044
8	23	mCYC	1.2327	1.09956
8	24	mCYC	1.42253	1.28731
8	25	mCYC	1.55283	1.41553
8	26	mCYC	1.63404	1.49467
8	27	mCYC	1.68241	1.54095
8	28	mCYC	1.70991	1.56637
8	29	mCYC	1.72561	1.57999
8	30	mCYC	1.73361	1.58592
8	31	mCYC	1.73565	1.58588
8	32	mCYC	1.73309	1.58124
8	33	mCYC	1.73187	1.57794
8	34	mCYC	1.72746	1.57145
8	35	mCYC	1.72272	1.56463
8	36	mCYC	1.71591	1.55575
8	37	mCYC	1.70969	1.54744
8	38	mCYC	1.70351	1.53918
8	39	mCYC	1.69913	1.53273
8	40	mCYC	1.69781	1.52932
9	1	mCYC	0.0730921	0.0032668
9	2	mCYC	0.0742886	0.00234592
9	3	mCYC	0.0761988	0.00213884
9	4	mCYC	0.0775229	0.00134557
9	5	mCYC	0.078188	-0.00010668
9	6	mCYC	0.0792582	-0.00115371
9	7	mCYC	0.0812328	-0.00129644
9	8	mCYC	0.0832427	-0.00140389
9	9	mCYC	0.0856335	-0.00113047
9	10	mCYC	0.0876941	-0.00118713
9	11	mCYC	0.0898514	-0.00114714
9	12	mCYC	0.0937224	0.000606497
9	13	mCYC	0.0985678	0.00333455
9	14	mCYC	0.10572	0.00836932
9	15	mCYC	0.116659	0.0171909
9	16	mCYC	0.135979	0.034394
9	17	mCYC	0.170521	0.066818
9	18	mCYC	0.231168	0.125348
9	19	mCYC	0.335341	0.227403
9	20	mCYC	0.502078	0.392024
9	21	mCYC	0.734768	0.622597
9	22	mCYC	1.00174	0.88745
9	23	mCYC	1.25205	1.13565
9	24	mCYC	1.44412	1.32559
9	25	mCYC	1.5776	1.45696
9	26	mCYC	1.65786	1.5351
9	27	mCYC	1.70322	1.57835
9	28	mCYC	1.73035	1.60336
9	29	mCYC	1.74298	1.61387
9	30	mCYC	1.75096	1.61973
9	31	mCYC	1.75332	1.61997
9	32	mCYC	1.75032	1.61486
9	33	mCYC	1.74732	1.60974
9	34	mCYC	1.74268	1.60298
9	35	mCYC	1.73878	1.59696
9	36	mCYC	1.73252	1.58859
9	37	mCYC	1.72534	1.57929
9	38	mCYC	1.71928	1.57112
9	39	mCYC	1.71507	1.56479
9	40	mCYC	1.71177	1.55936
10	1	mCYC	-0.0499896	0.00245985
10	2	mCYC	-0.0489972	0.00106517
10	3	mCYC	-0.0464301	0.00124519
10	4	mCYC	-0.0444494	0.000838813
10	5	mCYC	-0.0427752	0.000125897
10	6	mCYC	-0.0407369	-0.000222854
10	7	mCYC	-0.0390285	-0.000901583
10	8	mCYC	-0.0370129	-0.00127303
10	9	mCYC	-0.0344191	-0.00106636
10	10	mCYC	-0.0320864	-0.00112069
10	11	mCYC	-0.0288688	-0.000290197
10	12	mCYC	-0.0256574	0.000534096
10	13	mCYC	-0.0216737	0.00213071
10	14	mCYC	-0.0152424	0.00617494
10	15	mCYC	-0.0056594	0.0133709
10	16	mCYC	0.00993201	0.0265752
10	17	mCYC	0.0387256	0.0529817
10	18	mCYC	0.0873102	0.0991792
10	19	mCYC	0.17416	0.183642
10	20	mCYC	0.316569	0.323664
10	21	mCYC	0.525822	0.53053
10	22	mCYC	0.790685	0.793006
10	23	mCYC	1.05984	1.05978
10	24	mCYC	1.28092	1.27846
10	25	mCYC	1.43608	1.43124
10	26	mCYC	1.53036	1.52313
10	27	mCYC	1.58495	1.57534
10	28	mCYC	1.62059	1.60859
10	29	mCYC	1.64468	1.63029
10	30	mCYC	1.65534	1.63857
10	31	mCYC	1.65939	1.64023
10	32	mCYC	1.66041	1.63886
10	33	mCYC	1.65549	1.63155
10	34	mCYC	1.64955	1.62323
10	35	mCYC	1.64306	1.61435
10	36	mCYC	1.64062	1.60952
10	37	mCYC	1.63495	1.60146
10	38	mCYC	1.62833	1.59246
10	39	mCYC	1.62451	1.58625
10	40	mCYC	1.62288	1.58224
11	1	mCYC	0.104249	0.00182555
11	2	mCYC	0.105561	0.00094563
11	3	mCYC	0.108203	0.00139649
11	4	mCYC	0.110136	0.00113896
11	5	mCYC	0.111466	0.000277861
11	6	mCYC	0.111927	-0.0014527
11	7	mCYC	0.114223	-0.00134713
11	8	mCYC	0.118099	0.000337471
11	9	mCYC	0.118977	-0.000975352
11	10	mCYC	0.12057	-0.00157362
11	11	mCYC	0.123504	-0.000830217
11	12	mCYC	0.126934	0.000408665
11	13	mCYC	0.131336	0.00261958
11	14	mCYC	0.137466	0.00655781
11	15	mCYC	0.146598	0.0134986
11	16	mCYC	0.162189	0.0268991
11	17	mCYC	0.189758	0.0522765
11	18	mCYC	0.237471	0.0977991
11	19	mCYC	0.321542	0.179679
11	20	mCYC	0.460867	0.316813
11	21	mCYC	0.666308	0.520063
11	22	mCYC	0.925862	0.777426
11	23	mCYC	1.19033	1.03971
11	24	mCYC	1.4107	1.25788
11	25	mCYC	1.56915	1.41414
11	26	mCYC	1.66823	1.51103
11	27	mCYC	1.72775	1.56836
11	28	mCYC	1.76477	1.60319
11	29	mCYC	1.78807	1.62429
11	30	mCYC	1.79952	1.63355
11	31	mCYC	1.80069	1.63253
11	32	mCYC	1.80114	1.6308
11	33	mCYC	1.80018	1.62764
11	34	mCYC	1.79424	1.61951
11	35	mCYC	1.79038	1.61346
11	36	mCYC	1.7847	1.60559
11	37	mCYC	1.77672	1.59541
11	38	mCYC	1.76992	1.58642
11	39	mCYC	1.76455	1.57886
11	40	mCYC	1.75848	1.57061
12	1	mCYC	0.0763415	0.00358982
12	2	mCYC	0.0770515	0.00200479
12	3	mCYC	0.0783946	0.00105282
12	4	mCYC	0.0800723	0.000435508
12	5	mCYC	0.0822645	0.00033274
12	6	mCYC	0.0844228	0.000196019
12	7	mCYC	0.0860431	-0.000478737
12	8	mCYC	0.0875052	-0.00131161
12	9	mCYC	0.0897126	-0.00139925
12	10	mCYC	0.0925511	-0.000855759
12	11	mCYC	0.0951862	-0.00051565
12	12	mCYC	0.0981411	0.000144231
12	13	mCYC	0.102692	0.00239969
12	14	mCYC	0.10847	0.00588349
12	15	mCYC	0.118286	0.0134037
12	16	mCYC	0.134128	0.0269512
12	17	mCYC	0.161749	0.0522773
12	18	mCYC	0.210664	0.0988969
12	19	mCYC	0.296456	0.182394
12	20	mCYC	0.43878	0.322423
12	21	mCYC	0.647026	0.528374
12	22	mCYC	0.907516	0.786569
12	23	mCYC	1.17448	1.05124
12	24	mCYC	1.39594	1.2704
12	25	mCYC	1.55015	1.42232
12	26	mCYC	1.64776	1.51763
12	27	mCYC	1.70794	1.57552
12	28	mCYC	1.74155	1.60683
12	29	mCYC	1.76278	1.62576
12	30	mCYC	1.77226	1.63295
12	31	mCYC	1.77677	1.63517
12	32	mCYC	1.77252	1.62862
12	33	mCYC	1.77208	1.62588
12	34	mCYC	1.76741	1.61892
12	35	mCYC	1.76238	1.6116
12	36	mCYC	1.75729	1.60422
12	37	mCYC	1.75199	1.59662
12	38	mCYC	1.74829	1.59062
12	39	mCYC	1.74249	1.58252
12	40	mCYC	1.73426	1.572
13	1	mRGS5	0.0729384	-0.00411943
13	2	mRGS5	0.07474	-0.00306765
13	3	mRGS5	0.0777888	-0.000768608
13	4	mRGS5	0.0794576	0.000150412
13	5	mRGS5	0.0801496	9.26378e-05
13	6	mRGS5	0.0811193	0.000312488
13	7	mRGS5	0.081905	0.000348479
13	8	mRGS5	0.0827064	0.00040002
13	9	mRGS5	0.0835447	0.000488546
13	10	mRGS5	0.0845493	0.000743429
13	11	mRGS5	0.0847573	0.000201628
13	12	mRGS5	0.0850459	-0.00025958
13	13	mRGS5	0.0858931	-0.000162121
13	14	mRGS5	0.0865417	-0.000263324
13	15	mRGS5	0.0866421	-0.000912734
13	16	mRGS5	0.0872187	-0.00108589
13	17	mRGS5	0.0879453	-0.0011091
13	18	mRGS5	0.0887942	-0.00100995
13	19	mRGS5	0.0905417	-1.22199e-05
13	20	mRGS5	0.0941496	0.00284588
13	21	mRGS5	0.0993761	0.0073226
13	22	mRGS5	0.10939	0.016587
13	23	mRGS5	0.128135	0.0345814
13	24	mRGS5	0.163051	0.0687485
13	25	mRGS5	0.229181	0.134128
13	26	mRGS5	0.345575	0.249773
13	27	mRGS5	0.536281	0.439729
13	28	mRGS5	0.80772	0.710418
13	29	mRGS5	1.11515	1.0171
13	30	mRGS5	1.38529	1.28649
13	31	mRGS5	1.57481	1.47526
13	32	mRGS5	1.70511	1.60481
13	33	mRGS5	1.80443	1.70338
13	34	mRGS5	1.88086	1.77906
13	35	mRGS5	1.93627	1.83372
13	36	mRGS5	1.97274	1.86944
13	37	mRGS5	2.00036	1.89631
13	38	mRGS5	2.0235	1.9187
13	39	mRGS5	2.04096	1.93541
13	40	mRGS5	2.05174	1.94544
14	1	mRGS5	0.0664985	-0.00415131
14	2	mRGS5	0.0685921	-0.00280618
14	3	mRGS5	0.0716547	-0.000492112
14	4	mRGS5	0.0728892	-6.04874e-06
14	5	mRGS5	0.0738669	0.000223126
14	6	mRGS5	0.0748242	0.000431908
14	7	mRGS5	0.0753254	0.000184656
14	8	mRGS5	0.0761457	0.000256422
14	9	mRGS5	0.0768795	0.000241798
14	10	mRGS5	0.0773878	1.60889e-06
14	11	mRGS5	0.0784499	0.000315228
14	12	mRGS5	0.0789646	8.14314e-05
14	13	mRGS5	0.0798009	0.000169157
14	14	mRGS5	0.0803089	-7.13383e-05
14	15	mRGS5	0.0802938	-0.000834931
14	16	mRGS5	0.0806749	-0.00120224
14	17	mRGS5	0.0816857	-0.000939943
14	18	mRGS5	0.0825357	-0.000838464
14	19	mRGS5	0.084274	0.0001514
14	20	mRGS5	0.0871995	0.00232834
14	21	mRGS5	0.0921378	0.00651819
14	22	mRGS5	0.101154	0.0147855
14	23	mRGS5	0.119228	0.032111
14	24	mRGS5	0.153774	0.0659092
14	25	mRGS5	0.217319	0.128705
14	26	mRGS5	0.331532	0.24217
14	27	mRGS5	0.517663	0.427553
14	28	mRGS5	0.784152	0.693293
14	29	mRGS5	1.09252	1.00092
14	30	mRGS5	1.37018	1.27782
14	31	mRGS5	1.56449	1.47139
14	32	mRGS5	1.69915	1.6053
14	33	mRGS5	1.80452	1.70992
14	34	mRGS5	1.88149	1.78614
14	35	mRGS5	1.93731	1.84121
14	36	mRGS5	1.97604	1.87919
14	37	mRGS5	2.00725	1.90965
14	38	mRGS5	2.03155	1.9332
14	39	mRGS5	2.04984	1.95074
14	40	mRGS5	2.06202	1.96218
15	1	mRGS5	0.0832909	-0.00572497
15	2	mRGS5	0.0853842	-0.00444265
15	3	mRGS5	0.0889773	-0.00166042
15	4	mRGS5	0.0911872	-0.000261451
15	5	mRGS5	0.0924901	0.000230486
15	6	mRGS5	0.093451	0.000380396
15	7	mRGS5	0.0947328	0.000851344
15	8	mRGS5	0.0957067	0.00101428
15	9	mRGS5	0.0963339	0.000830499
15	10	mRGS5	0.0968029	0.000488633
15	11	mRGS5	0.0973445	0.000219232
15	12	mRGS5	0.0979358	-3.98856e-07
15	13	mRGS5	0.0986823	-6.4827e-05
15	14	mRGS5	0.0990248	-0.000533241
15	15	mRGS5	0.0994896	-0.000879308
15	16	mRGS5	0.100346	-0.00083384
15	17	mRGS5	0.100991	-0.000999335
15	18	mRGS5	0.102122	-0.000679411
15	19	mRGS5	0.103752	0.000138973
15	20	mRGS5	0.106182	0.00175839
15	21	mRGS5	0.111737	0.00650259
15	22	mRGS5	0.121986	0.0159403
15	23	mRGS5	0.141024	0.0341672
15	24	mRGS5	0.178036	0.0703691
15	25	mRGS5	0.246293	0.137815
15	26	mRGS5	0.367271	0.257982
15	27	mRGS5	0.562783	0.452683
15	28	mRGS5	0.83566	0.724749
15	29	mRGS5	1.14358	1.03186
15	30	mRGS5	1.41181	1.29928
15	31	mRGS5	1.59916	1.48581
15	32	mRGS5	1.72687	1.61271
15	33	mRGS5	1.82426	1.7093
15	34	mRGS5	1.89796	1.78218
15	35	mRGS5	1.9499	1.83331
15	36	mRGS5	1.99082	1.87342
15	37	mRGS5	2.02064	1.90243
15	38	mRGS5	2.04318	1.92416
15	39	mRGS5	2.06219	1.94236
15	40	mRGS5	2.07161	1.95097
16	1	mRGS5	0.0609029	-0.00330298
16	2	mRGS5	0.0623394	-0.00266255
16	3	mRGS5	0.0651848	-0.000613164
16	4	mRGS5	0.0666261	3.20183e-05
16	5	mRGS5	0.0676644	0.000274318
16	6	mRGS5	0.0685269	0.000340798
16	7	mRGS5	0.0695402	0.000558049
16	8	mRGS5	0.0702356	0.000457368
16	9	mRGS5	0.0711683	0.000594033
16	10	mRGS5	0.0722772	0.000906942
16	11	mRGS5	0.072504	0.000337619
16	12	mRGS5	0.0725377	-0.000424695
16	13	mRGS5	0.0731002	-0.00065819
16	14	mRGS5	0.0736103	-0.000944144
16	15	mRGS5	0.073889	-0.00146151
16	16	mRGS5	0.074951	-0.00119553
16	17	mRGS5	0.0756811	-0.00126146
16	18	mRGS5	0.0770609	-0.00067773
16	19	mRGS5	0.0790741	0.000539388
16	20	mRGS5	0.0825266	0.00319588
16	21	mRGS5	0.0897335	0.00960671
16	22	mRGS5	0.101506	0.0205835
16	23	mRGS5	0.125032	0.0433131
16	24	mRGS5	0.170408	0.0878931
16	25	mRGS5	0.253478	0.170167
16	26	mRGS5	0.39707	0.312963
16	27	mRGS5	0.622391	0.537488
16	28	mRGS5	0.919648	0.833949
16	29	mRGS5	1.23298	1.14649
16	30	mRGS5	1.48484	1.39755
16	31	mRGS5	1.65319	1.5651
16	32	mRGS5	1.77305	1.68416
16	33	mRGS5	1.86536	1.77568
16	34	mRGS5	1.93146	1.84098
16	35	mRGS5	1.97712	1.88585
16	36	mRGS5	2.01925	1.92718
16	37	mRGS5	2.04478	1.95192
16	38	mRGS5	2.06218	1.96852
16	39	mRGS5	2.07668	1.98222
16	40	mRGS5	2.08843	1.99317
17	1	mRGS5	0.077601	-0.00436689
17	2	mRGS5	0.0792905	-0.00354661
17	3	mRGS5	0.0826536	-0.00105273
17	4	mRGS5	0.0845366	-3.89387e-05
17	5	mRGS5	0.085792	0.000347226
17	6	mRGS5	0.0868689	0.000554882
17	7	mRGS5	0.0878763	0.000693106
17	8	mRGS5	0.0883879	0.000335479
17	9	mRGS5	0.088993	7.13563e-05
17	10	mRGS5	0.089902	0.000111128
17	11	mRGS5	0.0910396	0.000379506
17	12	mRGS5	0.0919634	0.00043409
17	13	mRGS5	0.0925757	0.000177255
17	14	mRGS5	0.0926701	-0.000597575
17	15	mRGS5	0.0931592	-0.000977695
17	16	mRGS5	0.0939293	-0.00107682
17	17	mRGS5	0.0950545	-0.000820852
17	18	mRGS5	0.0957072	-0.00103733
17	19	mRGS5	0.0974135	-0.000200232
17	20	mRGS5	0.101181	0.00269814
17	21	mRGS5	0.10856	0.00920754
17	22	mRGS5	0.121043	0.0208219
17	23	mRGS5	0.144558	0.0434675
17	24	mRGS5	0.190006	0.0880463
17	25	mRGS5	0.273492	0.170662
17	26	mRGS5	0.419362	0.315664
17	27	mRGS5	0.647905	0.543337
17	28	mRGS5	0.95024	0.844803
17	29	mRGS5	1.26816	1.16185
17	30	mRGS5	1.51971	1.41254
17	31	mRGS5	1.68521	1.57717
17	32	mRGS5	1.80149	1.69257
17	33	mRGS5	1.89289	1.78311
17	34	mRGS5	1.96105	1.8504
17	35	mRGS5	2.00876	1.89724
17	36	mRGS5	2.04011	1.92772
17	37	mRGS5	2.06645	1.95319
17	38	mRGS5	2.08738	1.97325
17	39	mRGS5	2.10322	1.98823
17	40	mRGS5	2.11178	1.99591
18	1	mRGS5	0.102955	-0.00583468
18	2	mRGS5	0.105159	-0.00457622
18	3	mRGS5	0.109148	-0.00153278
18	4	mRGS5	0.111546	-8.04622e-05
18	5	mRGS5	0.113481	0.000910059
18	6	mRGS5	0.114118	0.000600924
18	7	mRGS5	0.114664	0.00020189
18	8	mRGS5	0.115928	0.000520891
18	9	mRGS5	0.117083	0.00072972
18	10	mRGS5	0.118054	0.000755265
18	11	mRGS5	0.118684	0.000440802
18	12	mRGS5	0.119402	0.000212654
18	13	mRGS5	0.119726	-0.00040825
18	14	mRGS5	0.120068	-0.00101162
18	15	mRGS5	0.120698	-0.0013272
18	16	mRGS5	0.121554	-0.00141609
18	17	mRGS5	0.123068	-0.000847714
18	18	mRGS5	0.124188	-0.000673254
18	19	mRGS5	0.126082	0.000275022
18	20	mRGS5	0.129402	0.00265014
18	21	mRGS5	0.13597	0.00827205
18	22	mRGS5	0.148923	0.0202806
18	23	mRGS5	0.173358	0.0437698
18	24	mRGS5	0.219138	0.088604
18	25	mRGS5	0.303542	0.172063
18	26	mRGS5	0.449669	0.317244
18	27	mRGS5	0.677422	0.544052
18	28	mRGS5	0.978474	0.844159
18	29	mRGS5	1.29219	1.15693
18	30	mRGS5	1.54248	1.40628
18	31	mRGS5	1.70744	1.57028
18	32	mRGS5	1.82459	1.68649
18	33	mRGS5	1.91586	1.77682
18	34	mRGS5	1.98324	1.84326
18	35	mRGS5	2.0333	1.89236
18	36	mRGS5	2.06854	1.92666
18	37	mRGS5	2.09329	1.95046
18	38	mRGS5	2.11252	1.96875
18	39	mRGS5	2.12937	1.98466
18	40	mRGS5	2.14136	1.9957
19	1	mRGS5	0.0889321	-0.00484044
19	2	mRGS5	0.0906624	-0.00394001
19	3	mRGS5	0.0940398	-0.00139246
19	4	mRGS5	0.0961777	-8.4439e-05
19	5	mRGS5	0.097651	0.000559041
19	6	mRGS5	0.0981204	0.000198585
19	7	mRGS5	0.0987522	4.77129e-07
19	8	mRGS5	0.0998421	0.000260535
19	9	mRGS5	0.100903	0.000492021
19	10	mRGS5	0.102111	0.0008695
19	11	mRGS5	0.102922	0.000851353
19	12	mRGS5	0.103143	0.000241608
19	13	mRGS5	0.103409	-0.000321585
19	14	mRGS5	0.103988	-0.000572376
19	15	mRGS5	0.104745	-0.000645553
19	16	mRGS5	0.105545	-0.000675561
19	17	mRGS5	0.106405	-0.000645465
19	18	mRGS5	0.10759	-0.000290441
19	19	mRGS5	0.109865	0.00115476
19	20	mRGS5	0.114219	0.00467962
19	21	mRGS5	0.122518	0.0121483
19	22	mRGS5	0.137789	0.026589
19	23	mRGS5	0.16745	0.0554202
19	24	mRGS5	0.222569	0.10971
19	25	mRGS5	0.322105	0.208416
19	26	mRGS5	0.490742	0.376223
19	27	mRGS5	0.743484	0.628135
19	28	mRGS5	1.05883	0.942651
19	29	mRGS5	1.36078	1.24377
19	30	mRGS5	1.58099	1.46315
19	31	mRGS5	1.72526	1.60659
19	32	mRGS5	1.83432	1.71482
19	33	mRGS5	1.91457	1.79424
19	34	mRGS5	1.97142	1.85026
19	35	mRGS5	2.01395	1.89197
19	36	mRGS5	2.04512	1.9223
19	37	mRGS5	2.06858	1.94494
19	38	mRGS5	2.08781	1.96334
19	39	mRGS5	2.10089	1.97559
19	40	mRGS5	2.11012	1.98398
20	1	mRGS5	0.139328	-0.00714156
20	2	mRGS5	0.14186	-0.00569171
20	3	mRGS5	0.146442	-0.00219197
20	4	mRGS5	0.149997	0.000280412
20	5	mRGS5	0.151739	0.000939476
20	6	mRGS5	0.152708	0.000826064
20	7	mRGS5	0.153718	0.000752841
20	8	mRGS5	0.155116	0.0010691
20	9	mRGS5	0.156343	0.0012132
20	10	mRGS5	0.157059	0.000847048
20	11	mRGS5	0.157407	0.000112362
20	12	mRGS5	0.158007	-0.000370942
20	13	mRGS5	0.15878	-0.0006802
20	14	mRGS5	0.15876	-0.00178221
20	15	mRGS5	0.159356	-0.002269
20	16	mRGS5	0.161171	-0.00153727
20	17	mRGS5	0.163182	-0.000607971
20	18	mRGS5	0.16441	-0.000463354
20	19	mRGS5	0.166299	0.000343768
20	20	mRGS5	0.170557	0.00351865
20	21	mRGS5	0.178282	0.0101615
20	22	mRGS5	0.193507	0.0243034
20	23	mRGS5	0.221955	0.0516691
20	24	mRGS5	0.275301	0.103933
20	25	mRGS5	0.37235	0.199899
20	26	mRGS5	0.537157	0.363624
20	27	mRGS5	0.783179	0.608562
20	28	mRGS5	1.0908	0.915102
20	29	mRGS5	1.39045	1.21367
20	30	mRGS5	1.61291	1.43504
20	31	mRGS5	1.75789	1.57895
20	32	mRGS5	1.86247	1.68245
20	33	mRGS5	1.94067	1.75956
20	34	mRGS5	2.00129	1.81909
20	35	mRGS5	2.04491	1.86163
20	36	mRGS5	2.07652	1.89216
20	37	mRGS5	2.09917	1.91373
20	38	mRGS5	2.11725	1.93072
20	39	mRGS5	2.13016	1.94256
20	40	mRGS5	2.13726	1.94857
21	1	mRGS5	0.0794913	-0.00409997
21	2	mRGS5	0.0810466	-0.00338658
21	3	mRGS5	0.0839789	-0.00129615
21	4	mRGS5	0.0859964	-0.000120561
21	5	mRGS5	0.0869957	3.68393e-05
21	6	mRGS5	0.0880953	0.000294622
21	7	mRGS5	0.0887353	9.27405e-05
21	8	mRGS5	0.089913	0.000428516
21	9	mRGS5	0.0912274	0.000901016
21	10	mRGS5	0.091858	0.00068971
21	11	mRGS5	0.0924413	0.000431167
21	12	mRGS5	0.0932324	0.000380339
21	13	mRGS5	0.0936921	-1.75662e-06
21	14	mRGS5	0.0941395	-0.000396317
21	15	mRGS5	0.0947641	-0.000613591
21	16	mRGS5	0.0952674	-0.000952183
21	17	mRGS5	0.0962396	-0.000821895
21	18	mRGS5	0.0978953	-7.98649e-06
21	19	mRGS5	0.0997007	0.000955493
21	20	mRGS5	0.104182	0.00459459
21	21	mRGS5	0.112038	0.0116095
21	22	mRGS5	0.127073	0.025802
21	23	mRGS5	0.1554	0.0532872
21	24	mRGS5	0.20839	0.105435
21	25	mRGS5	0.304853	0.201056
21	26	mRGS5	0.467674	0.363036
21	27	mRGS5	0.711792	0.606312
21	28	mRGS5	1.01386	0.907538
21	29	mRGS5	1.30352	1.19636
21	30	mRGS5	1.52157	1.41356
21	31	mRGS5	1.66812	1.55927
21	32	mRGS5	1.77303	1.66334
21	33	mRGS5	1.85048	1.73995
21	34	mRGS5	1.90681	1.79543
21	35	mRGS5	1.95071	1.8385
21	36	mRGS5	1.98377	1.87071
21	37	mRGS5	2.00452	1.89062
21	38	mRGS5	2.02398	1.90924
21	39	mRGS5	2.03792	1.92234
21	40	mRGS5	2.0479	1.93148
22	1	mRGS5	0.0808382	-0.00722471
22	2	mRGS5	0.0829454	-0.00605822
22	3	mRGS5	0.0874669	-0.00247736
22	4	mRGS5	0.0901672	-0.00071782
22	5	mRGS5	0.0918535	2.78645e-05
22	6	mRGS5	0.0938734	0.0011071
22	7	mRGS5	0.0951982	0.00149125
22	8	mRGS5	0.0959411	0.00129345
22	9	mRGS5	0.0967173	0.00112896
22	10	mRGS5	0.0969521	0.000423126
22	11	mRGS5	0.0979179	0.000448205
22	12	mRGS5	0.0990843	0.000673987
22	13	mRGS5	0.0993238	-2.72313e-05
22	14	mRGS5	0.0997259	-0.000565811
22	15	mRGS5	0.100609	-0.000623695
22	16	mRGS5	0.101133	-0.00104055
22	17	mRGS5	0.101506	-0.00160788
22	18	mRGS5	0.102363	-0.00169095
22	19	mRGS5	0.103787	-0.00120804
22	20	mRGS5	0.106281	0.000344822
22	21	mRGS5	0.109897	0.00302056
22	22	mRGS5	0.116198	0.00838074
22	23	mRGS5	0.128755	0.0199971
22	24	mRGS5	0.152881	0.0431829
22	25	mRGS5	0.197751	0.0871122
22	26	mRGS5	0.280789	0.169209
22	27	mRGS5	0.424738	0.312217
22	28	mRGS5	0.649489	0.536027
22	29	mRGS5	0.944812	0.83041
22	30	mRGS5	1.25255	1.13721
22	31	mRGS5	1.4939	1.37762
22	32	mRGS5	1.65289	1.53567
22	33	mRGS5	1.76739	1.64922
22	34	mRGS5	1.85095	1.73185
22	35	mRGS5	1.91631	1.79627
22	36	mRGS5	1.96339	1.84241
22	37	mRGS5	1.99591	1.87398
22	38	mRGS5	2.02015	1.89728
22	39	mRGS5	2.03923	1.91542
22	40	mRGS5	2.04659	1.92184
23	1	mRGS5	0.108414	-0.00783161
23	2	mRGS5	0.110509	-0.00688607
23	3	mRGS5	0.114507	-0.00403789
23	4	mRGS5	0.118361	-0.00133401
23	5	mRGS5	0.120698	-0.000147013
23	6	mRGS5	0.122804	0.000808178
23	7	mRGS5	0.124499	0.00135362
23	8	mRGS5	0.126341	0.00204588
23	9	mRGS5	0.127098	0.00165254
23	10	mRGS5	0.128358	0.00176276
23	11	mRGS5	0.129277	0.00153106
23	12	mRGS5	0.130339	0.00144374
23	13	mRGS5	0.130603	0.000556922
23	14	mRGS5	0.130882	-0.00031392
23	15	mRGS5	0.131573	-0.000773177
23	16	mRGS5	0.131747	-0.00174927
23	17	mRGS5	0.132506	-0.00213943
23	18	mRGS5	0.134173	-0.00162254
23	19	mRGS5	0.135551	-0.00139463
23	20	mRGS5	0.137955	-0.000140565
23	21	mRGS5	0.141744	0.00249773
23	22	mRGS5	0.149312	0.0089157
23	23	mRGS5	0.162537	0.0209912
23	24	mRGS5	0.187115	0.044419
23	25	mRGS5	0.234851	0.0910048
23	26	mRGS5	0.321343	0.176347
23	27	mRGS5	0.469172	0.323025
23	28	mRGS5	0.691547	0.54425
23	29	mRGS5	0.969386	0.820939
23	30	mRGS5	1.23934	1.08974
23	31	mRGS5	1.4412	1.29045
23	32	mRGS5	1.5717	1.41981
23	33	mRGS5	1.66621	1.51316
23	34	mRGS5	1.74142	1.58723
23	35	mRGS5	1.79512	1.63977
23	36	mRGS5	1.8317	1.6752
23	37	mRGS5	1.85976	1.70211
23	38	mRGS5	1.87744	1.71864
23	39	mRGS5	1.89704	1.73709
23	40	mRGS5	1.91356	1.75247
24	1	mRGS5	0.0679782	-0.00863848
24	2	mRGS5	0.0709697	-0.0066648
24	3	mRGS5	0.0750796	-0.0035728
24	4	mRGS5	0.0784631	-0.00120714
24	5	mRGS5	0.0811647	0.000476545
24	6	mRGS5	0.0829941	0.00128811
24	7	mRGS5	0.0842094	0.00148553
24	8	mRGS5	0.0848975	0.0011558
24	9	mRGS5	0.0862947	0.00153509
24	10	mRGS5	0.0867796	0.00100221
24	11	mRGS5	0.0875128	0.00071748
24	12	mRGS5	0.0884048	0.000591609
24	13	mRGS5	0.0891902	0.000359166
24	14	mRGS5	0.08975	-9.89037e-05
24	15	mRGS5	0.0907112	-0.000155506
24	16	mRGS5	0.090625	-0.00125957
24	17	mRGS5	0.090963	-0.00193942
24	18	mRGS5	0.0926354	-0.00128494
24	19	mRGS5	0.0934165	-0.00152164
24	20	mRGS5	0.0957796	-0.000176481
24	21	mRGS5	0.0995788	0.00260486
24	22	mRGS5	0.106057	0.00806552
24	23	mRGS5	0.119671	0.020661
24	24	mRGS5	0.144267	0.044239
24	25	mRGS5	0.190405	0.08936
24	26	mRGS5	0.276439	0.174375
24	27	mRGS5	0.423809	0.320727
24	28	mRGS5	0.650503	0.546404
24	29	mRGS5	0.939059	0.833942
24	30	mRGS5	1.22858	1.12245
24	31	mRGS5	1.45345	1.3463
24	32	mRGS5	1.60022	1.49205
24	33	mRGS5	1.7028	1.59361
24	34	mRGS5	1.78536	1.67515
24	35	mRGS5	1.84724	1.73602
24	36	mRGS5	1.88957	1.77733
24	37	mRGS5	1.91365	1.80039
24	38	mRGS5	1.93757	1.82329
24	39	mRGS5	1.95844	1.84315
24	40	mRGS5	1.97273	1.85642
25	1	mLPAR5	0.299087	-0.00645968
25	2	mLPAR5	0.302543	-0.00391105
25	3	mLPAR5	0.307518	0.00015722
25	4	mLPAR5	0.308413	0.000144156
25	5	mLPAR5	0.308569	-0.000606605
25	6	mLPAR5	0.309847	-0.000235666
25	7	mLPAR5	0.310602	-0.000388861
25	8	mLPAR5	0.310998	-0.000899385
25	9	mLPAR5	0.312855	5.03448e-05
25	10	mLPAR5	0.314831	0.0011183
25	11	mLPAR5	0.315572	0.000951844
25	12	mLPAR5	0.316566	0.00103895
25	13	mLPAR5	0.317034	0.000599976
25	14	mLPAR5	0.316795	-0.000546262
25	15	mLPAR5	0.318049	-0.000200237
25	16	mLPAR5	0.318913	-0.000242955
25	17	mLPAR5	0.319945	-0.000118362
25	18	mLPAR5	0.320435	-0.000535516
25	19	mLPAR5	0.321513	-0.000365176
25	20	mLPAR5	0.322694	-9.18103e-05
25	21	mLPAR5	0.323557	-0.000135332
25	22	mLPAR5	0.324167	-0.000432711
25	23	mLPAR5	0.324953	-0.000554344
25	24	mLPAR5	0.327707	0.00129244
25	25	mLPAR5	0.332382	0.00505962
25	26	mLPAR5	0.339928	0.0116985
25	27	mLPAR5	0.353021	0.0238846
25	28	mLPAR5	0.378845	0.0488008
25	29	mLPAR5	0.426635	0.0956833
25	30	mLPAR5	0.513373	0.181515
25	31	mLPAR5	0.66048	0.327714
25	32	mLPAR5	0.880802	0.547129
25	33	mLPAR5	1.1578	0.823215
25	34	mLPAR5	1.44473	1.10924
25	35	mLPAR5	1.67832	1.34193
25	36	mLPAR5	1.83889	1.50159
25	37	mLPAR5	1.94065	1.60244
25	38	mLPAR5	2.00203	1.66292
25	39	mLPAR5	2.04424	1.70421
25	40	mLPAR5	2.07458	1.73365
26	1	mLPAR5	0.0814044	-0.00289749
26	2	mLPAR5	0.0827588	-0.00231056
26	3	mLPAR5	0.0852583	-0.000578504
26	4	mLPAR5	0.0867052	0.00010098
26	5	mLPAR5	0.0877027	0.000331133
26	6	mLPAR5	0.0883184	0.000179371
26	7	mLPAR5	0.088937	3.05358e-05
26	8	mLPAR5	0.0901781	0.000504271
26	9	mLPAR5	0.0913673	0.000925987
26	10	mLPAR5	0.0920965	0.000887764
26	11	mLPAR5	0.0930616	0.00108548
26	12	mLPAR5	0.0936598	0.000916288
26	13	mLPAR5	0.094026	0.00051508
26	14	mLPAR5	0.0936746	-0.000603821
26	15	mLPAR5	0.094027	-0.00101883
26	16	mLPAR5	0.0947023	-0.00111089
26	17	mLPAR5	0.09538	-0.00120068
26	18	mLPAR5	0.0959617	-0.00138631
26	19	mLPAR5	0.0967048	-0.00141068
26	20	mLPAR5	0.0974182	-0.00146471
26	21	mLPAR5	0.0983126	-0.00133766
26	22	mLPAR5	0.0993452	-0.00107254
26	23	mLPAR5	0.100791	-0.000394164
26	24	mLPAR5	0.103267	0.00131409
26	25	mLPAR5	0.107508	0.00478781
26	26	mLPAR5	0.114389	0.0109015
26	27	mLPAR5	0.127563	0.0233079
26	28	mLPAR5	0.15234	0.0473177
26	29	mLPAR5	0.199036	0.0932463
26	30	mLPAR5	0.28376	0.177203
26	31	mLPAR5	0.43014	0.322816
26	32	mLPAR5	0.654717	0.546625
26	33	mLPAR5	0.947431	0.838572
26	34	mLPAR5	1.25314	1.14351
26	35	mLPAR5	1.50747	1.39707
26	36	mLPAR5	1.68412	1.57296
26	37	mLPAR5	1.79377	1.68184
26	38	mLPAR5	1.8634	1.7507
26	39	mLPAR5	1.91101	1.79755
26	40	mLPAR5	1.9419	1.82767
27	1	mLPAR5	0.132238	-0.00395404
27	2	mLPAR5	0.133537	-0.00349663
27	3	mLPAR5	0.135789	-0.00208561
27	4	mLPAR5	0.137977	-0.000738624
27	5	mLPAR5	0.140046	0.000489659
27	6	mLPAR5	0.141371	0.000972854
27	7	mLPAR5	0.142281	0.00104207
27	8	mLPAR5	0.143298	0.00121754
27	9	mLPAR5	0.144281	0.00135994
27	10	mLPAR5	0.144757	0.000994741
27	11	mLPAR5	0.145098	0.000494057
27	12	mLPAR5	0.146197	0.000752469
27	13	mLPAR5	0.146979	0.000692502
27	14	mLPAR5	0.146757	-0.000370775
27	15	mLPAR5	0.147127	-0.00084185
27	16	mLPAR5	0.14803	-0.000780045
27	17	mLPAR5	0.148511	-0.0011402
27	18	mLPAR5	0.148725	-0.0017673
27	19	mLPAR5	0.14926	-0.00207302
27	20	mLPAR5	0.150443	-0.00173131
27	21	mLPAR5	0.151631	-0.00138441
27	22	mLPAR5	0.153169	-0.000688072
27	23	mLPAR5	0.154923	0.000225409
27	24	mLPAR5	0.156768	0.00122851
27	25	mLPAR5	0.160512	0.00413147
27	26	mLPAR5	0.167076	0.00985476
27	27	mLPAR5	0.179059	0.020996
27	28	mLPAR5	0.201727	0.0428231
27	29	mLPAR5	0.245205	0.0854597
27	30	mLPAR5	0.325074	0.164488
27	31	mLPAR5	0.462473	0.301046
27	32	mLPAR5	0.677062	0.514794
27	33	mLPAR5	0.958034	0.794925
27	34	mLPAR5	1.25578	1.09183
27	35	mLPAR5	1.50754	1.34274
27	36	mLPAR5	1.6879	1.52227
27	37	mLPAR5	1.80245	1.63597
27	38	mLPAR5	1.87184	1.70452
27	39	mLPAR5	1.91712	1.74896
27	40	mLPAR5	1.94722	1.77822
28	1	mLPAR5	0.854783	-0.0487922
28	2	mLPAR5	0.868202	-0.0384213
28	3	mLPAR5	0.887886	-0.021785
28	4	mLPAR5	0.899207	-0.0135124
28	5	mLPAR5	0.910295	-0.00547311
28	6	mLPAR5	0.919203	0.000386919
28	7	mLPAR5	0.928867	0.00700286
28	8	mLPAR5	0.932162	0.00724956
28	9	mLPAR5	0.935908	0.00794754
28	10	mLPAR5	0.938852	0.00784329
28	11	mLPAR5	0.94149	0.00743303
28	12	mLPAR5	0.944572	0.00746737
28	13	mLPAR5	0.946142	0.00598912
28	14	mLPAR5	0.948353	0.00515138
28	15	mLPAR5	0.951192	0.00494223
28	16	mLPAR5	0.954341	0.00504332
28	17	mLPAR5	0.953887	0.00154125
28	18	mLPAR5	0.955529	0.000134998
28	19	mLPAR5	0.957839	-0.000603024
28	20	mLPAR5	0.958204	-0.00328624
28	21	mLPAR5	0.960407	-0.00413203
28	22	mLPAR5	0.963266	-0.00432038
28	23	mLPAR5	0.965032	-0.00560277
28	24	mLPAR5	0.967704	-0.00597941
28	25	mLPAR5	0.973293	-0.00343852
28	26	mLPAR5	0.983231	0.00345166
28	27	mLPAR5	0.999098	0.0162701
28	28	mLPAR5	1.0308	0.0449245
28	29	mLPAR5	1.08946	0.100537
28	30	mLPAR5	1.19099	0.199021
28	31	mLPAR5	1.35258	0.357559
28	32	mLPAR5	1.56432	0.566248
28	33	mLPAR5	1.79005	0.788928
28	34	mLPAR5	1.98566	0.981491
28	35	mLPAR5	2.12335	1.11614
28	36	mLPAR5	2.21087	1.2006
28	37	mLPAR5	2.26517	1.25186
28	38	mLPAR5	2.30208	1.28573
28	39	mLPAR5	2.32745	1.30804
28	40	mLPAR5	2.34085	1.3184
29	1	mLPAR5	0.102551	-0.00298562
29	2	mLPAR5	0.103544	-0.00274284
29	3	mLPAR5	0.105599	-0.00143894
29	4	mLPAR5	0.107394	-0.000394502
29	5	mLPAR5	0.109028	0.000489041
29	6	mLPAR5	0.110023	0.000734301
29	7	mLPAR5	0.110801	0.00076181
29	8	mLPAR5	0.11176	0.000970666
29	9	mLPAR5	0.112373	0.000833085
29	10	mLPAR5	0.112773	0.000482014
29	11	mLPAR5	0.113478	0.000436917
29	12	mLPAR5	0.114449	0.000657098
29	13	mLPAR5	0.114985	0.000442515
29	14	mLPAR5	0.115169	-0.000123124
29	15	mLPAR5	0.115629	-0.000413651
29	16	mLPAR5	0.115647	-0.00114682
29	17	mLPAR5	0.116247	-0.00129715
29	18	mLPAR5	0.116819	-0.00147548
29	19	mLPAR5	0.117123	-0.00192149
29	20	mLPAR5	0.118311	-0.00148448
29	21	mLPAR5	0.119206	-0.00134005
29	22	mLPAR5	0.121034	-0.000261873
29	23	mLPAR5	0.123637	0.00159085
29	24	mLPAR5	0.126696	0.00389927
29	25	mLPAR5	0.132	0.00845271
29	26	mLPAR5	0.14151	0.0172123
29	27	mLPAR5	0.159614	0.0345659
29	28	mLPAR5	0.1933	0.0675015
29	29	mLPAR5	0.256881	0.130332
29	30	mLPAR5	0.369358	0.242058
29	31	mLPAR5	0.553112	0.425062
29	32	mLPAR5	0.812906	0.684106
29	33	mLPAR5	1.1173	0.987754
29	34	mLPAR5	1.39834	1.26804
29	35	mLPAR5	1.60975	1.4787
29	36	mLPAR5	1.74864	1.61683
29	37	mLPAR5	1.83456	1.70201
29	38	mLPAR5	1.89107	1.75777
29	39	mLPAR5	1.92781	1.79375
29	40	mLPAR5	1.95049	1.81569
30	1	mLPAR5	1.23969	-0.0739304
30	2	mLPAR5	1.2615	-0.0556127
30	3	mLPAR5	1.29531	-0.0253074
30	4	mLPAR5	1.3142	-0.00991342
30	5	mLPAR5	1.32782	0.000202414
30	6	mLPAR5	1.33658	0.00546226
30	7	mLPAR5	1.34229	0.00767297
30	8	mLPAR5	1.34395	0.00583247
30	9	mLPAR5	1.34767	0.00605787
30	10	mLPAR5	1.35098	0.0058683
30	11	mLPAR5	1.35377	0.00515362
30	12	mLPAR5	1.3584	0.00629096
30	13	mLPAR5	1.36046	0.00484922
30	14	mLPAR5	1.35802	-0.00109172
30	15	mLPAR5	1.36087	-0.00174537
30	16	mLPAR5	1.36972	0.00360758
30	17	mLPAR5	1.37391	0.00429837
30	18	mLPAR5	1.37513	0.00201835
30	19	mLPAR5	1.37909	0.00248324
30	20	mLPAR5	1.37991	-0.000195303
30	21	mLPAR5	1.37926	-0.00434477
30	22	mLPAR5	1.3833	-0.00380585
30	23	mLPAR5	1.38642	-0.00418353
30	24	mLPAR5	1.3886	-0.00550725
30	25	mLPAR5	1.3939	-0.00370305
30	26	mLPAR5	1.40218	0.00107281
30	27	mLPAR5	1.41592	0.0113173
30	28	mLPAR5	1.44519	0.0370884
30	29	mLPAR5	1.49843	0.0868265
30	30	mLPAR5	1.5905	0.175392
30	31	mLPAR5	1.74092	0.322313
30	32	mLPAR5	1.96353	0.541429
30	33	mLPAR5	2.23426	0.808651
30	34	mLPAR5	2.49391	1.06481
30	35	mLPAR5	2.69766	1.26506
30	36	mLPAR5	2.83287	1.39677
30	37	mLPAR5	2.91631	1.47671
30	38	mLPAR5	2.97362	1.53052
30	39	mLPAR5	3.01669	1.57008
30	40	mLPAR5	3.04328	1.59318
31	1	mLPAR5	0.247593	-0.0130967
31	2	mLPAR5	0.251357	-0.0105884
31	3	mLPAR5	0.257644	-0.00555756
31	4	mLPAR5	0.261996	-0.00246117
31	5	mLPAR5	0.265114	-0.000598178
31	6	mLPAR5	0.267642	0.000673593
31	7	mLPAR5	0.270276	0.002052
31	8	mLPAR5	0.271781	0.00230199
31	9	mLPAR5	0.272345	0.00161
31	10	mLPAR5	0.273884	0.0018937
31	11	mLPAR5	0.27542	0.00217374
31	12	mLPAR5	0.276374	0.00187168
31	13	mLPAR5	0.277194	0.00143602
31	14	mLPAR5	0.277436	0.000422638
31	15	mLPAR5	0.27856	0.000290778
31	16	mLPAR5	0.279523	-1.56614e-06
31	17	mLPAR5	0.280094	-0.000685901
31	18	mLPAR5	0.281017	-0.0010191
31	19	mLPAR5	0.281811	-0.00148085
31	20	mLPAR5	0.283042	-0.00150473
31	21	mLPAR5	0.284528	-0.00127479
31	22	mLPAR5	0.286185	-0.000873425
31	23	mLPAR5	0.287673	-0.000640623
31	24	mLPAR5	0.290941	0.00137174
31	25	mLPAR5	0.295943	0.00511767
31	26	mLPAR5	0.304023	0.011942
31	27	mLPAR5	0.318669	0.025332
31	28	mLPAR5	0.345937	0.0513448
31	29	mLPAR5	0.398335	0.102487
31	30	mLPAR5	0.493809	0.196706
31	31	mLPAR5	0.654942	0.356582
31	32	mLPAR5	0.897156	0.597541
31	33	mLPAR5	1.19714	0.896274
31	34	mLPAR5	1.49466	1.19253
31	35	mLPAR5	1.73239	1.42901
31	36	mLPAR5	1.89189	1.58725
31	37	mLPAR5	1.99138	1.68549
31	38	mLPAR5	2.05003	1.74288
31	39	mLPAR5	2.09305	1.78465
31	40	mLPAR5	2.12198	1.81232
32	1	mLPAR5	0.0537293	-0.00251169
32	2	mLPAR5	0.0547541	-0.00225269
32	3	mLPAR5	0.0569838	-0.00078867
32	4	mLPAR5	0.0587048	0.000166513
32	5	mLPAR5	0.0598007	0.000496727
32	6	mLPAR5	0.0607727	0.000702974
32	7	mLPAR5	0.0616575	0.000822045
32	8	mLPAR5	0.0622521	0.000650965
32	9	mLPAR5	0.0630636	0.000696731
32	10	mLPAR5	0.0638374	0.000704762
32	11	mLPAR5	0.0643175	0.000419152
32	12	mLPAR5	0.0647352	7.11054e-05
32	13	mLPAR5	0.0654093	-2.0574e-05
32	14	mLPAR5	0.0656541	-0.000541489
32	15	mLPAR5	0.0660966	-0.00086471
32	16	mLPAR5	0.0665118	-0.00121521
32	17	mLPAR5	0.0671808	-0.00131196
32	18	mLPAR5	0.0675634	-0.00169508
32	19	mLPAR5	0.0681967	-0.00182753
32	20	mLPAR5	0.0689453	-0.00184472
32	21	mLPAR5	0.0705206	-0.00103507
32	22	mLPAR5	0.0725611	0.00023969
32	23	mLPAR5	0.0748594	0.00177219
32	24	mLPAR5	0.0782551	0.00440216
32	25	mLPAR5	0.0841133	0.00949464
32	26	mLPAR5	0.0937313	0.0183469
32	27	mLPAR5	0.113248	0.0370979
32	28	mLPAR5	0.149363	0.0724474
32	29	mLPAR5	0.216745	0.139063
32	30	mLPAR5	0.336194	0.257746
32	31	mLPAR5	0.529372	0.450159
32	32	mLPAR5	0.798198	0.718219
32	33	mLPAR5	1.10571	1.02497
32	34	mLPAR5	1.38475	1.30324
32	35	mLPAR5	1.59079	1.50852
32	36	mLPAR5	1.72436	1.64132
32	37	mLPAR5	1.80408	1.72027
32	38	mLPAR5	1.85347	1.76889
32	39	mLPAR5	1.89018	1.80484
32	40	mLPAR5	1.91532	1.82921
33	1	mLPAR5	0.0761349	-0.00147604
33	2	mLPAR5	0.0774538	-0.000825098
33	3	mLPAR5	0.0787532	-0.00019364
33	4	mLPAR5	0.0796969	8.21432e-05
33	5	mLPAR5	0.080896	0.00061328
33	6	mLPAR5	0.0813429	0.000392251
33	7	mLPAR5	0.0821232	0.00050462
33	8	mLPAR5	0.082726	0.000439412
33	9	mLPAR5	0.0836152	0.000660649
33	10	mLPAR5	0.0839132	0.000290683
33	11	mLPAR5	0.0843507	6.02214e-05
33	12	mLPAR5	0.0853975	0.000439083
33	13	mLPAR5	0.0855623	-6.40921e-05
33	14	mLPAR5	0.0863018	7.52256e-06
33	15	mLPAR5	0.0862969	-0.000665384
33	16	mLPAR5	0.086352	-0.00127817
33	17	mLPAR5	0.0869177	-0.00138043
33	18	mLPAR5	0.0873026	-0.0016635
33	19	mLPAR5	0.0876587	-0.00197531
33	20	mLPAR5	0.0886979	-0.00160412
33	21	mLPAR5	0.0902386	-0.000731376
33	22	mLPAR5	0.0923387	0.000700767
33	23	mLPAR5	0.0939495	0.00164366
33	24	mLPAR5	0.0966955	0.00372173
33	25	mLPAR5	0.101357	0.00771488
33	26	mLPAR5	0.109428	0.0151183
33	27	mLPAR5	0.126095	0.0311175
33	28	mLPAR5	0.157262	0.0616162
33	29	mLPAR5	0.214878	0.118565
33	30	mLPAR5	0.317973	0.220991
33	31	mLPAR5	0.490022	0.392372
33	32	mLPAR5	0.739379	0.641061
33	33	mLPAR5	1.04125	0.942268
33	34	mLPAR5	1.3304	1.23074
33	35	mLPAR5	1.55378	1.45345
33	36	mLPAR5	1.70123	1.60024
33	37	mLPAR5	1.79134	1.68968
33	38	mLPAR5	1.84606	1.74373
33	39	mLPAR5	1.88347	1.78048
33	40	mLPAR5	1.90951	1.80585
34	1	mLPAR5	0.0819507	-0.00438224
34	2	mLPAR5	0.0835052	-0.0035554
34	3	mLPAR5	0.0862471	-0.00154116
34	4	mLPAR5	0.088404	-0.000112001
34	5	mLPAR5	0.0896676	0.000423945
34	6	mLPAR5	0.0904331	0.000461722
34	7	mLPAR5	0.0911285	0.000429442
34	8	mLPAR5	0.092149	0.000722253
34	9	mLPAR5	0.0932265	0.00107206
34	10	mLPAR5	0.0939663	0.00108425
34	11	mLPAR5	0.0946282	0.00101841
34	12	mLPAR5	0.09524	0.000902539
34	13	mLPAR5	0.0950396	-2.55912e-05
34	14	mLPAR5	0.0950227	-0.000770147
34	15	mLPAR5	0.0960055	-0.000515006
34	16	mLPAR5	0.0964251	-0.000823085
34	17	mLPAR5	0.0965554	-0.00142051
34	18	mLPAR5	0.0968851	-0.00181848
34	19	mLPAR5	0.0976954	-0.00173588
34	20	mLPAR5	0.0986914	-0.0014676
34	21	mLPAR5	0.099981	-0.000905704
34	22	mLPAR5	0.101702	8.77672e-05
34	23	mLPAR5	0.103542	0.0012002
34	24	mLPAR5	0.106802	0.00373257
34	25	mLPAR5	0.11265	0.00885307
34	26	mLPAR5	0.122965	0.0184401
34	27	mLPAR5	0.141309	0.0360563
34	28	mLPAR5	0.175968	0.0699876
34	29	mLPAR5	0.241757	0.135049
34	30	mLPAR5	0.359975	0.252539
34	31	mLPAR5	0.552602	0.444438
34	32	mLPAR5	0.824494	0.715603
34	33	mLPAR5	1.13967	1.03005
34	34	mLPAR5	1.4295	1.31915
34	35	mLPAR5	1.6461	1.53503
34	36	mLPAR5	1.78444	1.67263
34	37	mLPAR5	1.86709	1.75456
34	38	mLPAR5	1.91847	1.80521
34	39	mLPAR5	1.95534	1.84136
34	40	mLPAR5	1.98151	1.8668
35	1	mLPAR5	0.0610161	-0.002852
35	2	mLPAR5	0.0624928	-0.00200096
35	3	mLPAR5	0.0645391	-0.000580265
35	4	mLPAR5	0.065768	2.3036e-05
35	5	mLPAR5	0.0670992	0.000728641
35	6	mLPAR5	0.0678365	0.000840391
35	7	mLPAR5	0.0680439	0.000422128
35	8	mLPAR5	0.0687326	0.000485263
35	9	mLPAR5	0.0695194	0.000646447
35	10	mLPAR5	0.0702273	0.000728722
35	11	mLPAR5	0.0704487	0.000324585
35	12	mLPAR5	0.0709442	0.000194444
35	13	mLPAR5	0.0711346	-0.000240768
35	14	mLPAR5	0.0716837	-0.000317265
35	15	mLPAR5	0.0720469	-0.000579691
35	16	mLPAR5	0.0717882	-0.00146402
35	17	mLPAR5	0.0720745	-0.00180334
35	18	mLPAR5	0.0728183	-0.00168513
35	19	mLPAR5	0.0735205	-0.00160846
35	20	mLPAR5	0.0742831	-0.00147152
35	21	mLPAR5	0.0756251	-0.000755141
35	22	mLPAR5	0.0776188	0.000612947
35	23	mLPAR5	0.0794455	0.00181406
35	24	mLPAR5	0.081942	0.00368494
35	25	mLPAR5	0.0864794	0.0075968
35	26	mLPAR5	0.0948003	0.0152921
35	27	mLPAR5	0.109847	0.0297131
35	28	mLPAR5	0.138752	0.0579922
35	29	mLPAR5	0.193687	0.112302
35	30	mLPAR5	0.290587	0.208577
35	31	mLPAR5	0.454741	0.372104
35	32	mLPAR5	0.701412	0.618151
35	33	mLPAR5	1.00931	0.925426
35	34	mLPAR5	1.31485	1.23033
35	35	mLPAR5	1.5548	1.46966
35	36	mLPAR5	1.71753	1.63177
35	37	mLPAR5	1.81205	1.72566
35	38	mLPAR5	1.86855	1.78153
35	39	mLPAR5	1.90552	1.81788
35	40	mLPAR5	1.93384	1.84557
36	1	mLPAR5	0.0816941	-0.00343448
36	2	mLPAR5	0.0836181	-0.00218227
36	3	mLPAR5	0.0859421	-0.000530115
36	4	mLPAR5	0.0874254	0.000281295
36	5	mLPAR5	0.0884256	0.000609705
36	6	mLPAR5	0.0889814	0.000493651
36	7	mLPAR5	0.0893051	0.000145564
36	8	mLPAR5	0.0905383	0.00070691
36	9	mLPAR5	0.0911541	0.0006509
36	10	mLPAR5	0.0915679	0.000392816
36	11	mLPAR5	0.0920568	0.000209885
36	12	mLPAR5	0.0924788	-3.99362e-05
36	13	mLPAR5	0.0930965	-9.40906e-05
36	14	mLPAR5	0.0937314	-0.000130997
36	15	mLPAR5	0.0941239	-0.000410345
36	16	mLPAR5	0.0944326	-0.000773408
36	17	mLPAR5	0.0947802	-0.00109771
36	18	mLPAR5	0.094708	-0.00184169
36	19	mLPAR5	0.0951627	-0.00205881
36	20	mLPAR5	0.0965336	-0.00135979
36	21	mLPAR5	0.0980509	-0.000514272
36	22	mLPAR5	0.0994245	0.000187531
36	23	mLPAR5	0.101508	0.00159947
36	24	mLPAR5	0.104154	0.00357344
36	25	mLPAR5	0.109483	0.00823097
36	26	mLPAR5	0.119266	0.0173421
36	27	mLPAR5	0.137324	0.0347282
36	28	mLPAR5	0.172547	0.0692794
36	29	mLPAR5	0.237654	0.133714
36	30	mLPAR5	0.353767	0.249155
36	31	mLPAR5	0.544309	0.439025
36	32	mLPAR5	0.815866	0.709911
36	33	mLPAR5	1.13037	1.02374
36	34	mLPAR5	1.42081	1.31352
36	35	mLPAR5	1.6397	1.53173
36	36	mLPAR5	1.78151	1.67287
36	37	mLPAR5	1.86756	1.75825
36	38	mLPAR5	1.91941	1.80942
36	39	mLPAR5	1.9553	1.84464
36	40	mLPAR5	1.97875	1.86742
37	1	mPALM2	0.0506273	-0.00583112
37	2	mPALM2	0.0530034	-0.00429922
37	3	mPALM2	0.0564308	-0.00171595
37	4	mPALM2	0.0583422	-0.000648805
37	5	mPALM2	0.0600987	0.000263618
37	6	mPALM2	0.0611683	0.000489016
37	7	mPALM2	0.062481	0.000957492
37	8	mPALM2	0.0633424	0.000974747
37	9	mPALM2	0.0641183	0.000906517
37	10	mPALM2	0.0649993	0.000943296
37	11	mPALM2	0.0652132	0.000313091
37	12	mPALM2	0.0661686	0.000424242
37	13	mPALM2	0.0668137	0.000225232
37	14	mPALM2	0.0680087	0.000576067
37	15	mPALM2	0.0686445	0.000367633
37	16	mPALM2	0.0688544	-0.000266625
37	17	mPALM2	0.0692277	-0.000737499
37	18	mPALM2	0.0694459	-0.0013634
37	19	mPALM2	0.0694465	-0.00220702
37	20	mPALM2	0.0707691	-0.00172854
37	21	mPALM2	0.0720571	-0.00128473
37	22	mPALM2	0.072946	-0.00124001
37	23	mPALM2	0.0745611	-0.000469128
37	24	mPALM2	0.0771385	0.00126417
37	25	mPALM2	0.0806751	0.00395659
37	26	mPALM2	0.0870007	0.00943803
37	27	mPALM2	0.099035	0.0206281
37	28	mPALM2	0.121659	0.0424084
37	29	mPALM2	0.16495	0.0848552
37	30	mPALM2	0.24463	0.16369
37	31	mPALM2	0.383673	0.301889
37	32	mPALM2	0.605154	0.522526
37	33	mPALM2	0.907312	0.82384
37	34	mPALM2	1.24186	1.15754
37	35	mPALM2	1.54087	1.45571
37	36	mPALM2	1.75662	1.67062
37	37	mPALM2	1.90196	1.81512
37	38	mPALM2	1.99765	1.90995
37	39	mPALM2	2.05402	1.96549
37	40	mPALM2	2.09218	2.0028
38	1	mPALM2	0.0420286	-0.00397627
38	2	mPALM2	0.0434448	-0.00327096
38	3	mPALM2	0.0458351	-0.00159155
38	4	mPALM2	0.0469862	-0.00115142
38	5	mPALM2	0.0484819	-0.000366595
38	6	mPALM2	0.049905	0.000345596
38	7	mPALM2	0.0511111	0.000840867
38	8	mPALM2	0.0523334	0.00135225
38	9	mPALM2	0.0530286	0.00133659
38	10	mPALM2	0.0534685	0.00106552
38	11	mPALM2	0.0539384	0.00082459
38	12	mPALM2	0.0544865	0.000661803
38	13	mPALM2	0.054865	0.000329378
38	14	mPALM2	0.0549752	-0.000271312
38	15	mPALM2	0.0556898	-0.000267582
38	16	mPALM2	0.0562085	-0.00045978
38	17	mPALM2	0.0570076	-0.000371653
38	18	mPALM2	0.0573516	-0.000738466
38	19	mPALM2	0.0574657	-0.00133531
38	20	mPALM2	0.0582799	-0.00123196
38	21	mPALM2	0.0591212	-0.00110162
38	22	mPALM2	0.0600297	-0.000904009
38	23	mPALM2	0.0611687	-0.000475905
38	24	mPALM2	0.0629055	0.000549967
38	25	mPALM2	0.066027	0.0029606
38	26	mPALM2	0.0719895	0.00821218
38	27	mPALM2	0.0825973	0.0181091
38	28	mPALM2	0.102834	0.0376353
38	29	mPALM2	0.141354	0.0754443
38	30	mPALM2	0.212	0.145379
38	31	mPALM2	0.3377	0.270368
38	32	mPALM2	0.542997	0.474954
38	33	mPALM2	0.834108	0.765355
38	34	mPALM2	1.17036	1.10089
38	35	mPALM2	1.4831	1.41292
38	36	mPALM2	1.72343	1.65254
38	37	mPALM2	1.88621	1.81461
38	38	mPALM2	1.99136	1.91905
38	39	mPALM2	2.06006	1.98704
38	40	mPALM2	2.09621	2.02248
39	1	mPALM2	0.064244	-0.00368218
39	2	mPALM2	0.0653439	-0.00324885
39	3	mPALM2	0.0673346	-0.00192465
39	4	mPALM2	0.0689317	-0.000994194
39	5	mPALM2	0.0707	0.000107583
39	6	mPALM2	0.0719187	0.000659694
39	7	mPALM2	0.0724048	0.000479219
39	8	mPALM2	0.073001	0.000408841
39	9	mPALM2	0.0736578	0.000399096
39	10	mPALM2	0.074565	0.00063978
39	11	mPALM2	0.0753193	0.000727533
39	12	mPALM2	0.0758325	0.000574156
39	13	mPALM2	0.0764393	0.000514373
39	14	mPALM2	0.0771445	0.00055299
39	15	mPALM2	0.0777778	0.000519716
39	16	mPALM2	0.0780293	0.000104659
39	17	mPALM2	0.0787631	0.000171886
39	18	mPALM2	0.0786869	-0.000570877
39	19	mPALM2	0.0790218	-0.000902502
39	20	mPALM2	0.0796081	-0.000982833
39	21	mPALM2	0.0804868	-0.000770685
39	22	mPALM2	0.0816284	-0.000295673
39	23	mPALM2	0.0816483	-0.000942308
39	24	mPALM2	0.0829937	-0.000263426
39	25	mPALM2	0.0857114	0.00178761
39	26	mPALM2	0.0903084	0.00571808
39	27	mPALM2	0.0981152	0.0128583
39	28	mPALM2	0.112434	0.0265108
39	29	mPALM2	0.140154	0.0535636
39	30	mPALM2	0.191099	0.103842
39	31	mPALM2	0.284162	0.196239
39	32	mPALM2	0.444565	0.355975
39	33	mPALM2	0.689301	0.600045
39	34	mPALM2	1.01019	0.920266
39	35	mPALM2	1.34557	1.25498
39	36	mPALM2	1.62401	1.53275
39	37	mPALM2	1.82575	1.73382
39	38	mPALM2	1.95995	1.86736
39	39	mPALM2	2.04781	1.95456
39	40	mPALM2	2.10263	2.00871
40	1	mPALM2	0.0986636	-0.00524633
40	2	mPALM2	0.100203	-0.00449721
40	3	mPALM2	0.102912	-0.00257854
40	4	mPALM2	0.105539	-0.000741721
40	5	mPALM2	0.107627	0.000556383
40	6	mPALM2	0.10859	0.000729457
40	7	mPALM2	0.109157	0.000506719
40	8	mPALM2	0.110588	0.001147
40	9	mPALM2	0.11146	0.00122909
40	10	mPALM2	0.112206	0.00118441
40	11	mPALM2	0.112821	0.00101004
40	12	mPALM2	0.113485	0.000883441
40	13	mPALM2	0.113812	0.000420645
40	14	mPALM2	0.114341	0.000158859
40	15	mPALM2	0.114618	-0.00035402
40	16	mPALM2	0.114861	-0.000901395
40	17	mPALM2	0.11551	-0.00104236
40	18	mPALM2	0.1162	-0.00114209
40	19	mPALM2	0.116693	-0.00143899
40	20	mPALM2	0.116907	-0.00201564
40	21	mPALM2	0.117938	-0.00177457
40	22	mPALM2	0.119308	-0.00119497
40	23	mPALM2	0.122161	0.000867991
40	24	mPALM2	0.126573	0.00449026
40	25	mPALM2	0.132991	0.0101178
40	26	mPALM2	0.146342	0.0226791
40	27	mPALM2	0.172087	0.0476335
40	28	mPALM2	0.219116	0.0938724
40	29	mPALM2	0.306067	0.180033
40	30	mPALM2	0.454278	0.327454
40	31	mPALM2	0.681786	0.554172
40	32	mPALM2	0.976321	0.847917
40	33	mPALM2	1.28622	1.15702
40	34	mPALM2	1.5474	1.41741
40	35	mPALM2	1.72942	1.59865
40	36	mPALM2	1.84847	1.7169
40	37	mPALM2	1.92627	1.79392
40	38	mPALM2	1.97781	1.84467
40	39	mPALM2	2.01778	1.88384
40	40	mPALM2	2.03723	1.9025
41	1	mPALM2	0.0808143	-0.00673763
41	2	mPALM2	0.0826952	-0.00573165
41	3	mPALM2	0.0867454	-0.00255638
41	4	mPALM2	0.0897886	-0.000388189
41	5	mPALM2	0.0916539	0.000602142
41	6	mPALM2	0.0925989	0.000672236
41	7	mPALM2	0.093077	0.000275374
41	8	mPALM2	0.0941612	0.000484683
41	9	mPALM2	0.0952326	0.000681154
41	10	mPALM2	0.0967004	0.00127395
41	11	mPALM2	0.0975136	0.0012122
41	12	mPALM2	0.0978395	0.000663168
41	13	mPALM2	0.0984169	0.000365644
41	14	mPALM2	0.0987825	-0.000143678
41	15	mPALM2	0.0993287	-0.000472458
41	16	mPALM2	0.100185	-0.00049063
41	17	mPALM2	0.101077	-0.000474164
41	18	mPALM2	0.101356	-0.00107029
41	19	mPALM2	0.101839	-0.00146188
41	20	mPALM2	0.103093	-0.00108245
41	21	mPALM2	0.104304	-0.000746551
41	22	mPALM2	0.106183	0.000256841
41	23	mPALM2	0.1092	0.00239929
41	24	mPALM2	0.113565	0.00588932
41	25	mPALM2	0.121974	0.0134231
41	26	mPALM2	0.13749	0.0280646
41	27	mPALM2	0.168031	0.0577303
41	28	mPALM2	0.224088	0.112913
41	29	mPALM2	0.326617	0.214567
41	30	mPALM2	0.50056	0.387635
41	31	mPALM2	0.759431	0.645631
41	32	mPALM2	1.08743	0.972757
41	33	mPALM2	1.41496	1.29941
41	34	mPALM2	1.68262	1.5662
41	35	mPALM2	1.86854	1.75124
41	36	mPALM2	1.98808	1.8699
41	37	mPALM2	2.06626	1.94721
41	38	mPALM2	2.11752	1.9976
41	39	mPALM2	2.14818	2.02738
41	40	mPALM2	2.17	2.04832
42	1	mPALM2	0.0713719	-0.00876934
42	2	mPALM2	0.076434	-0.00471276
42	3	mPALM2	0.0808537	-0.00129867
42	4	mPALM2	0.0823556	-0.000802285
42	5	mPALM2	0.0843327	0.000169334
42	6	mPALM2	0.0855509	0.000381947
42	7	mPALM2	0.087065	0.00089046
42	8	mPALM2	0.0879743	0.000794232
42	9	mPALM2	0.0890546	0.000869024
42	10	mPALM2	0.0899952	0.000804074
42	11	mPALM2	0.0911105	0.000913802
42	12	mPALM2	0.0919908	0.000788576
42	13	mPALM2	0.0923557	0.000147919
42	14	mPALM2	0.0932389	2.56581e-05
42	15	mPALM2	0.0941127	-0.000106124
42	16	mPALM2	0.0945215	-0.00070289
42	17	mPALM2	0.0952768	-0.000953092
42	18	mPALM2	0.0955335	-0.00170197
42	19	mPALM2	0.0964231	-0.0018179
42	20	mPALM2	0.0976811	-0.00156544
42	21	mPALM2	0.0993042	-0.000947848
42	22	mPALM2	0.100663	-0.000594478
42	23	mPALM2	0.10297	0.000706851
42	24	mPALM2	0.107268	0.00399882
42	25	mPALM2	0.115191	0.0109167
42	26	mPALM2	0.13013	0.0248507
42	27	mPALM2	0.157714	0.0514283
42	28	mPALM2	0.208541	0.10125
42	29	mPALM2	0.302561	0.194264
42	30	mPALM2	0.463984	0.354682
42	31	mPALM2	0.713488	0.603181
42	32	mPALM2	1.04149	0.930177
42	33	mPALM2	1.38855	1.27623
42	34	mPALM2	1.68088	1.56755
42	35	mPALM2	1.88882	1.77449
42	36	mPALM2	2.02133	1.906
42	37	mPALM2	2.11103	1.99469
42	38	mPALM2	2.16802	2.05067
42	39	mPALM2	2.20929	2.09094
42	40	mPALM2	2.23954	2.12019
43	1	mPALM2	0.0740414	-0.00651403
43	2	mPALM2	0.0761456	-0.00514847
43	3	mPALM2	0.0800512	-0.00198155
43	4	mPALM2	0.0824452	-0.000326248
43	5	mPALM2	0.0837971	0.000287014
43	6	mPALM2	0.0847783	0.000529616
43	7	mPALM2	0.085293	0.000305626
43	8	mPALM2	0.0865849	0.000858821
43	9	mPALM2	0.0875516	0.00108691
43	10	mPALM2	0.0881656	0.000962214
43	11	mPALM2	0.0889094	0.000967337
43	12	mPALM2	0.0891974	0.000516752
43	13	mPALM2	0.0897836	0.000364221
43	14	mPALM2	0.0900011	-0.000156899
43	15	mPALM2	0.0902354	-0.000661232
43	16	mPALM2	0.0905617	-0.00107368
43	17	mPALM2	0.0913032	-0.00107075
43	18	mPALM2	0.0919183	-0.00119431
43	19	mPALM2	0.0926528	-0.00119851
43	20	mPALM2	0.0938673	-0.000722685
43	21	mPALM2	0.0944849	-0.000843768
43	22	mPALM2	0.0965583	0.00049103
43	23	mPALM2	0.0996661	0.00286009
43	24	mPALM2	0.105311	0.00776656
43	25	mPALM2	0.114998	0.0167148
43	26	mPALM2	0.133696	0.0346742
43	27	mPALM2	0.167087	0.0673263
43	28	mPALM2	0.230201	0.129702
43	29	mPALM2	0.344227	0.242989
43	30	mPALM2	0.532444	0.430467
43	31	mPALM2	0.810876	0.708161
43	32	mPALM2	1.14736	1.04391
43	33	mPALM2	1.47536	1.37117
43	34	mPALM2	1.73747	1.63254
43	35	mPALM2	1.91802	1.81235
43	36	mPALM2	2.03145	1.92504
43	37	mPALM2	2.10578	1.99863
43	38	mPALM2	2.15614	2.04826
43	39	mPALM2	2.18986	2.08124
43	40	mPALM2	2.20998	2.10062
44	1	mPALM2	0.131322	0.00235646
44	2	mPALM2	0.130756	0.00102844
44	3	mPALM2	0.130774	0.000283368
44	4	mPALM2	0.131339	8.70327e-05
44	5	mPALM2	0.132407	0.000391957
44	6	mPALM2	0.13264	-0.000136644
44	7	mPALM2	0.133255	-0.000284611
44	8	mPALM2	0.134821	0.000519727
44	9	mPALM2	0.136214	0.00115063
44	10	mPALM2	0.136454	0.0006276
44	11	mPALM2	0.136911	0.000322874
44	12	mPALM2	0.137675	0.000324426
44	13	mPALM2	0.137964	-0.000148639
44	14	mPALM2	0.138227	-0.000648005
44	15	mPALM2	0.138349	-0.0012881
44	16	mPALM2	0.138954	-0.00144542
44	17	mPALM2	0.140009	-0.00115282
44	18	mPALM2	0.140689	-0.001235
44	19	mPALM2	0.141478	-0.00120865
44	20	mPALM2	0.142583	-0.000865668
44	21	mPALM2	0.144377	0.000165957
44	22	mPALM2	0.1459	0.000926559
44	23	mPALM2	0.149349	0.00361342
44	24	mPALM2	0.154889	0.00839103
44	25	mPALM2	0.165252	0.0179919
44	26	mPALM2	0.184936	0.0369136
44	27	mPALM2	0.221157	0.0723717
44	28	mPALM2	0.288232	0.138685
44	29	mPALM2	0.408731	0.258422
44	30	mPALM2	0.60796	0.456888
44	31	mPALM2	0.894384	0.74255
44	32	mPALM2	1.23591	1.08331
44	33	mPALM2	1.56001	1.40666
44	34	mPALM2	1.8081	1.65398
44	35	mPALM2	1.97395	1.81907
44	36	mPALM2	2.07969	1.92404
44	37	mPALM2	2.15091	1.99451
44	38	mPALM2	2.20078	2.04361
44	39	mPALM2	2.2385	2.08057
44	40	mPALM2	2.26371	2.10501
45	1	mPALM2	0.0387205	-0.00467549
45	2	mPALM2	0.0407138	-0.00358759
45	3	mPALM2	0.0433306	-0.00187615
45	4	mPALM2	0.045388	-0.00072416
45	5	mPALM2	0.0474657	0.00044813
45	6	mPALM2	0.0484852	0.000562266
45	7	mPALM2	0.0495473	0.000718941
45	8	mPALM2	0.0505541	0.000820359
45	9	mPALM2	0.0513884	0.000749259
45	10	mPALM2	0.0522654	0.000720798
45	11	mPALM2	0.0535732	0.00112323
45	12	mPALM2	0.0536921	0.000336752
45	13	mPALM2	0.054502	0.00024124
45	14	mPALM2	0.0551203	-4.58562e-05
45	15	mPALM2	0.0558765	-0.000195087
45	16	mPALM2	0.0562611	-0.000715897
45	17	mPALM2	0.0568495	-0.00103288
45	18	mPALM2	0.0571232	-0.00166459
45	19	mPALM2	0.0580702	-0.00162303
45	20	mPALM2	0.0598733	-0.000725252
45	21	mPALM2	0.0614053	-9.86498e-05
45	22	mPALM2	0.0631728	0.000763424
45	23	mPALM2	0.065532	0.00221716
45	24	mPALM2	0.0707037	0.0064835
45	25	mPALM2	0.0803558	0.0152302
45	26	mPALM2	0.0981083	0.0320773
45	27	mPALM2	0.131785	0.0648489
45	28	mPALM2	0.194717	0.126875
45	29	mPALM2	0.308352	0.239605
45	30	mPALM2	0.49749	0.427837
45	31	mPALM2	0.775059	0.704501
45	32	mPALM2	1.1143	1.04283
45	33	mPALM2	1.44712	1.37475
45	34	mPALM2	1.70696	1.63368
45	35	mPALM2	1.88018	1.806
45	36	mPALM2	1.99569	1.92061
45	37	mPALM2	2.07253	1.99654
45	38	mPALM2	2.11811	2.04121
45	39	mPALM2	2.15387	2.07606
45	40	mPALM2	2.17916	2.10045
46	1	mPALM2	0.255536	-0.0105524
46	2	mPALM2	0.259583	-0.00761637
46	3	mPALM2	0.263726	-0.00458422
46	4	mPALM2	0.267003	-0.00241849
46	5	mPALM2	0.27026	-0.000272275
46	6	mPALM2	0.272397	0.000753997
46	7	mPALM2	0.274929	0.00217536
46	8	mPALM2	0.276459	0.00259411
46	9	mPALM2	0.277198	0.00222167
46	10	mPALM2	0.278113	0.00202608
46	11	mPALM2	0.278592	0.00139367
46	12	mPALM2	0.279337	0.00102815
46	13	mPALM2	0.280295	0.000874841
46	14	mPALM2	0.280559	2.86336e-05
46	15	mPALM2	0.281111	-0.000530935
46	16	mPALM2	0.281943	-0.00080926
46	17	mPALM2	0.282865	-0.000999012
46	18	mPALM2	0.283599	-0.00137506
46	19	mPALM2	0.284791	-0.00129429
46	20	mPALM2	0.286281	-0.000914882
46	21	mPALM2	0.287539	-0.000767987
46	22	mPALM2	0.288291	-0.00112693
46	23	mPALM2	0.289988	-0.000541252
46	24	mPALM2	0.291602	-3.8249e-05
46	25	mPALM2	0.295327	0.00257634
46	26	mPALM2	0.301231	0.007369
46	27	mPALM2	0.31199	0.0170171
46	28	mPALM2	0.33255	0.0364663
46	29	mPALM2	0.370884	0.0736891
46	30	mPALM2	0.441473	0.143168
46	31	mPALM2	0.567779	0.268362
46	32	mPALM2	0.771994	0.471466
46	33	mPALM2	1.05322	0.751583
46	34	mPALM2	1.37264	1.06989
46	35	mPALM2	1.66215	1.35829
46	36	mPALM2	1.87828	1.57331
46	37	mPALM2	2.01989	1.7138
46	38	mPALM2	2.11153	1.80434
46	39	mPALM2	2.17082	1.86251
46	40	mPALM2	2.20714	1.89773
47	1	mPALM2	0.0432461	-0.0062475
47	2	mPALM2	0.0442339	-0.0062149
47	3	mPALM2	0.0473934	-0.00401058
47	4	mPALM2	0.0505471	-0.00181206
47	5	mPALM2	0.052971	-0.000343293
47	6	mPALM2	0.0548261	0.000556529
47	7	mPALM2	0.0572102	0.00198551
47	8	mPALM2	0.0580959	0.00191604
47	9	mPALM2	0.0589806	0.00184555
47	10	mPALM2	0.0600054	0.00191512
47	11	mPALM2	0.0601834	0.0011379
47	12	mPALM2	0.0609547	0.000954049
47	13	mPALM2	0.0615119	0.000556099
47	14	mPALM2	0.0621985	0.000287521
47	15	mPALM2	0.0626122	-0.000254006
47	16	mPALM2	0.0634863	-0.000335127
47	17	mPALM2	0.0640151	-0.000761501
47	18	mPALM2	0.0642688	-0.00146297
47	19	mPALM2	0.0648487	-0.00183827
47	20	mPALM2	0.0662032	-0.00143894
47	21	mPALM2	0.0677108	-0.000886491
47	22	mPALM2	0.0691928	-0.000359742
47	23	mPALM2	0.0707388	0.000231089
47	24	mPALM2	0.0735805	0.00211758
47	25	mPALM2	0.078692	0.00627391
47	26	mPALM2	0.0876221	0.0142489
47	27	mPALM2	0.10439	0.0300617
47	28	mPALM2	0.135923	0.0606391
47	29	mPALM2	0.196109	0.119871
47	30	mPALM2	0.304677	0.227483
47	31	mPALM2	0.48396	0.405811
47	32	mPALM2	0.744906	0.665802
47	33	mPALM2	1.06027	0.980213
47	34	mPALM2	1.36439	1.28338
47	35	mPALM2	1.59817	1.5162
47	36	mPALM2	1.75562	1.67269
47	37	mPALM2	1.86173	1.77785
47	38	mPALM2	1.93442	1.84958
47	39	mPALM2	1.98174	1.89595
47	40	mPALM2	2.01368	1.92694
48	1	mPALM2	0.0375168	-0.00892963
48	2	mPALM2	0.0393206	-0.00805796
48	3	mPALM2	0.0433672	-0.00494333
48	4	mPALM2	0.0471061	-0.00213656
48	5	mPALM2	0.0496901	-0.000484552
48	6	mPALM2	0.052207	0.00110028
48	7	mPALM2	0.0541609	0.00212206
48	8	mPALM2	0.0549063	0.00193539
48	9	mPALM2	0.0557425	0.00183955
48	10	mPALM2	0.0564066	0.00157165
48	11	mPALM2	0.0571711	0.00140409
48	12	mPALM2	0.0575078	0.000808645
48	13	mPALM2	0.0585133	0.000882156
48	14	mPALM2	0.0593581	0.000794828
48	15	mPALM2	0.0596093	0.000113998
48	16	mPALM2	0.0601591	-0.000268227
48	17	mPALM2	0.0606543	-0.000705129
48	18	mPALM2	0.0615904	-0.000701086
48	19	mPALM2	0.0620006	-0.00122295
48	20	mPALM2	0.0627956	-0.00136
48	21	mPALM2	0.0640988	-0.000988808
48	22	mPALM2	0.0654711	-0.000548597
48	23	mPALM2	0.0665286	-0.000423203
48	24	mPALM2	0.0690936	0.0012098
48	25	mPALM2	0.0738094	0.00499355
48	26	mPALM2	0.0820774	0.0123294
48	27	mPALM2	0.0972279	0.0265479
48	28	mPALM2	0.126219	0.0546067
48	29	mPALM2	0.181032	0.108488
48	30	mPALM2	0.280031	0.206555
48	31	mPALM2	0.448775	0.374367
48	32	mPALM2	0.698886	0.623545
48	33	mPALM2	1.01549	0.939218
48	34	mPALM2	1.33526	1.25805
48	35	mPALM2	1.5922	1.51407
48	36	mPALM2	1.77085	1.69179
48	37	mPALM2	1.88462	1.80462
48	38	mPALM2	1.95599	1.87506
48	39	mPALM2	2.00552	1.92365
48	40	mPALM2	2.03989	1.9571
49	1	mTAT	0.126292	-0.00275803
49	2	mTAT	0.12792	-0.00230084
49	3	mTAT	0.131358	-3.40601e-05
49	4	mTAT	0.133124	0.000561185
49	5	mTAT	0.134727	0.000992398
49	6	mTAT	0.135649	0.000744118
49	7	mTAT	0.135635	-0.0004414
49	8	mTAT	0.13679	-0.000457758
49	9	mTAT	0.137971	-0.000447935
49	10	mTAT	0.138647	-0.000942829
49	11	mTAT	0.139778	-0.000982373
49	12	mTAT	0.141146	-0.000785332
49	13	mTAT	0.142043	-0.00105954
49	14	mTAT	0.14443	0.000156458
49	15	mTAT	0.148142	0.00269707
49	16	mTAT	0.155407	0.00879079
49	17	mTAT	0.167877	0.0200899
49	18	mTAT	0.192067	0.0431092
49	19	mTAT	0.238123	0.0879936
49	20	mTAT	0.320882	0.169582
49	21	mTAT	0.461743	0.309272
49	22	mTAT	0.671928	0.518286
49	23	mTAT	0.940163	0.78535
49	24	mTAT	1.2134	1.05742
49	25	mTAT	1.42603	1.26887
49	26	mTAT	1.56668	1.40835
49	27	mTAT	1.6683	1.50881
49	28	mTAT	1.74612	1.58545
49	29	mTAT	1.80817	1.64633
49	30	mTAT	1.85386	1.69084
49	31	mTAT	1.89077	1.72658
49	32	mTAT	1.91837	1.75301
49	33	mTAT	1.93804	1.77151
49	34	mTAT	1.95643	1.78873
49	35	mTAT	1.97247	1.8036
49	36	mTAT	1.98198	1.81194
49	37	mTAT	1.99014	1.81893
49	38	mTAT	1.99681	1.82443
49	39	mTAT	2.00707	1.83351
49	40	mTAT	2.01497	1.84025
50	1	mTAT	0.139913	-0.00174148
50	2	mTAT	0.141194	-0.00161942
50	3	mTAT	0.143635	-0.000337954
50	4	mTAT	0.145667	0.000535664
50	5	mTAT	0.146969	0.000678559
[truncated: 13,395 more rows]

## Sheet: Results
Block Type	384-Well Block
Calibration Background is expired	Yes
Calibration Background performed on	10-12-2018 11:47:46 PDT
Calibration FAM is expired	Yes
Calibration FAM performed on	10-23-2018 10:23:19 PDT
Calibration MELTDOCTOR is expired	Yes
Calibration MELTDOCTOR performed on	09-26-2017 21:22:46 PDT
Calibration NED is expired	Yes
Calibration NED performed on	10-23-2018 10:33:14 PDT
Calibration ROI is expired	Yes
Calibration ROI performed on	10-12-2018 09:37:21 PDT
Calibration ROX is expired	Yes
Calibration ROX performed on	10-23-2018 10:07:21 PDT
Calibration SYBR is expired	Yes
Calibration SYBR performed on	10-23-2018 09:57:53 PDT
Calibration TAMRA is expired	Yes
Calibration TAMRA performed on	10-23-2018 10:45:25 PDT
Calibration Uniformity is expired	Yes
Calibration Uniformity performed on	10-12-2018 10:06:59 PDT
Calibration VIC is expired	Yes
Calibration VIC performed on	10-23-2018 10:54:25 PDT
Chemistry	SYBR_GREEN
Date Created	02-02-2021 13:40:31 PST
Experiment File Name	D:\NZZ\2021-02-02 120723.eds
Experiment Name	2021-02-02 120723
Experiment Run End Time	02-02-2021 06:46:44 PST
Experiment Type	Comparative Cт (ΔΔCт)
Instrument Name	285880860
Instrument Serial Number	285880860
Instrument Type	QuantStudio 12K Flex
Passive Reference	ROX
Quantification Cycle Method	Ct
Signal Smoothing On	true
Stage/ Cycle where Analysis is performed	Stage 2, Step 2
Well	Well Position	Omit	Sample Name	Target Name	Task	Reporter	Quencher	RQ	RQ Min	RQ Max	CT	Ct Mean	Ct SE	Quantity	Delta Ct Mean	Delta Ct SE	Delta Delta Ct	Automatic Ct Threshold	Ct Threshold	Automatic Baseline	Baseline Start	Baseline End	Efficiency	Comments	Amp Score	Cq Conf	Tm1	Tm2	Tm3	MTP	EXPFAIL	HIGHSD	NOAMP	THOLDFAIL
4	A4	false	w8-vec	mCYC	UNKNOWN	SYBR	None				18.708	18.7841	0.0917395					true	0.195325	true	3	13			1.32845	0.973937	85.1959			N	N	N	N	N
5	A5	false	w8-vec	mCYC	UNKNOWN	SYBR	None				18.967	18.7841	0.0917395					true	0.195325	true	3	13			1.31968	0.984171	85.1959			N	N	N	N	N
6	A6	false	w8-vec	mCYC	UNKNOWN	SYBR	None				18.678	18.7841	0.0917395					true	0.195325	true	3	13			1.33339	0.977573	85.1959			N	N	N	N	N
7	A7	false	w4-HBx	mCYC	UNKNOWN	SYBR	None				18.816	18.7769	0.0277674					true	0.195325	true	3	13			1.33324	0.97028	85.1959			N	N	N	N	N
8	A8	false	w4-HBx	mCYC	UNKNOWN	SYBR	None				18.791	18.7769	0.0277674					true	0.195325	true	3	13			1.33091	0.973768	85.1959			N	N	N	N	N
9	A9	false	w4-HBx	mCYC	UNKNOWN	SYBR	None				18.723	18.7769	0.0277674					true	0.195325	true	3	13			1.33652	0.968685	85.1959			N	N	N	N	N
10	A10	false	w7-HBx	mCYC	UNKNOWN	SYBR	None				19.07	19.0841	0.0108588					true	0.195325	true	3	13			1.3416	0.966936	85.1959			N	N	N	N	N
11	A11	false	w7-HBx	mCYC	UNKNOWN	SYBR	None				19.106	19.0841	0.0108588					true	0.195325	true	3	13			1.33831	0.970924	85.3243			N	N	N	N	N
12	A12	false	w7-HBx	mCYC	UNKNOWN	SYBR	None				19.076	19.0841	0.0108588					true	0.195325	true	3	13			1.33998	0.969858	85.3243			N	N	N	N	N
16	A16	false	w8-vec	mRGS5	UNKNOWN	SYBR	None	1.1205	0.938847	1.3373	25.12	25.1107	0.00557403		6.32657	0.0919087	-0.164141	true	0.186673	true	3	20			1.36775	0.973259	86.2234			N	N	N	N	N
17	A17	false	w8-vec	mRGS5	UNKNOWN	SYBR	None	1.1205	0.938847	1.3373	25.112	25.1107	0.00557403		6.32657	0.0919087	-0.164141	true	0.186673	true	3	20			1.37025	0.970654	86.2234			N	N	N	N	N
18	A18	false	w8-vec	mRGS5	UNKNOWN	SYBR	None	1.1205	0.938847	1.3373	25.1	25.1107	0.00557403		6.32657	0.0919087	-0.164141	true	0.186673	true	3	20			1.36876	0.967626	86.2234			N	N	N	N	N
19	A19	false	w4-HBx	mRGS5	UNKNOWN	SYBR	None	1.328	1.24218	1.41974	24.817	24.8583	0.0208313		6.08146	0.0347127	-0.40925	true	0.186673	true	3	19			1.36825	0.972924	86.2234			N	N	N	N	N
20	A20	false	w4-HBx	mRGS5	UNKNOWN	SYBR	None	1.328	1.24218	1.41974	24.883	24.8583	0.0208313		6.08146	0.0347127	-0.40925	true	0.186673	true	3	20			1.36534	0.965416	86.2234			N	N	N	N	N
21	A21	false	w4-HBx	mRGS5	UNKNOWN	SYBR	None	1.328	1.24218	1.41974	24.875	24.8583	0.0208313		6.08146	0.0347127	-0.40925	true	0.186673	true	3	19			1.36088	0.973209	86.2234			N	N	N	N	N
22	A22	false	w7-HBx	mRGS5	UNKNOWN	SYBR	None	0.703896	0.670694	0.738743	26.125	26.0814	0.0226375		6.99728	0.0251072	0.506565	true	0.186673	true	3	21			1.36401	0.964969	86.2234			N	N	N	N	N
23	A23	false	w7-HBx	mRGS5	UNKNOWN	SYBR	None	0.703896	0.670694	0.738743	26.048	26.0814	0.0226375		6.99728	0.0251072	0.506565	true	0.186673	true	3	21			1.34332	0.956679	86.2234			N	N	N	N	N
24	A24	false	w7-HBx	mRGS5	UNKNOWN	SYBR	None	0.703896	0.670694	0.738743	26.071	26.0814	0.0226375		6.99728	0.0251072	0.506565	true	0.186673	true	3	21			1.35583	0.960577	86.2234			N	N	N	N	N
40	B16	false	w8-vec	mPALM2	UNKNOWN	SYBR	None	2.54717	2.02689	3.20099	29.206	29.0788	0.0753574		10.2947	0.118722	-1.34889	true	0.208608	true	3	24			1.36882	0.970393	82.2418			N	N	N	N	N
41	B17	false	w8-vec	mPALM2	UNKNOWN	SYBR	None	2.54717	2.02689	3.20099	28.945	29.0788	0.0753574		10.2947	0.118722	-1.34889	true	0.208608	true	3	23			1.38581	0.971901	82.2418			N	N	N	N	N
42	B18	false	w8-vec	mPALM2	UNKNOWN	SYBR	None	2.54717	2.02689	3.20099	29.086	29.0788	0.0753574		10.2947	0.118722	-1.34889	true	0.208608	true	3	24			1.39211	0.965771	82.3702			N	N	N	N	N
43	B19	false	w4-HBx	mPALM2	UNKNOWN	SYBR	None	3.2587	2.96492	3.58159	28.745	28.7162	0.0404848		9.93929	0.0490923	-1.7043	true	0.208608	true	3	23			1.38998	0.974211	82.3702			N	N	N	N	N
44	B20	false	w4-HBx	mPALM2	UNKNOWN	SYBR	None	3.2587	2.96492	3.58159	28.636	28.7162	0.0404848		9.93929	0.0490923	-1.7043	true	0.208608	true	3	23			1.3891	0.98582	82.3702			N	N	N	N	N
45	B21	false	w4-HBx	mPALM2	UNKNOWN	SYBR	None	3.2587	2.96492	3.58159	28.767	28.7162	0.0404848		9.93929	0.0490923	-1.7043	true	0.208608	true	3	23			1.39078	0.973681	82.3702			N	N	N	N	N
46	B22	false	w7-HBx	mPALM2	UNKNOWN	SYBR	None	1.51176	0.987586	2.31414	30.567	30.1315	0.220969		11.0474	0.221236	-0.596227	true	0.208608	true	3	25			1.37142	0.960011	82.2418			N	N	N	N	N
47	B23	false	w7-HBx	mPALM2	UNKNOWN	SYBR	None	1.51176	0.987586	2.31414	29.851	30.1315	0.220969		11.0474	0.221236	-0.596227	true	0.208608	true	3	24			1.37297	0.969277	82.2418			N	N	N	N	N
48	B24	false	w7-HBx	mPALM2	UNKNOWN	SYBR	None	1.51176	0.987586	2.31414	29.976	30.1315	0.220969		11.0474	0.221236	-0.596227	true	0.208608	true	3	24			1.37859	0.967507	82.2418			N	N	N	N	N
52	C4	false	w8-vec	mTAT	UNKNOWN	SYBR	None	1.26332	1.04438	1.52815	19.645	19.5725	0.0369311		0.788404	0.0988941	-0.337215	true	0.190092	true	3	14			1.34104	0.964799	85.7096			N	N	N	N	N
53	C5	false	w8-vec	mTAT	UNKNOWN	SYBR	None	1.26332	1.04438	1.52815	19.546	19.5725	0.0369311		0.788404	0.0988941	-0.337215	true	0.190092	true	3	14			1.34846	0.971737	85.7096			N	N	N	N	N
54	C6	false	w8-vec	mTAT	UNKNOWN	SYBR	None	1.26332	1.04438	1.52815	19.526	19.5725	0.0369311		0.788404	0.0988941	-0.337215	true	0.190092	true	3	14			1.34213	0.957391	85.7096			N	N	N	N	N
55	C7	false	w4-HBx	mTAT	UNKNOWN	SYBR	None	2.89983	2.59374	3.24204	18.307	18.3665	0.05088		-0.410348	0.0579638	-1.53597	true	0.190092	true	3	13			1.35401	0.961916	85.7096			N	N	N	N	N
56	C8	false	w4-HBx	mTAT	UNKNOWN	SYBR	None	2.89983	2.59374	3.24204	18.325	18.3665	0.05088		-0.410348	0.0579638	-1.53597	true	0.190092	true	3	13			1.35418	0.959483	85.7096			N	N	N	N	N
57	C9	false	w4-HBx	mTAT	UNKNOWN	SYBR	None	2.89983	2.59374	3.24204	18.468	18.3665	0.05088		-0.410348	0.0579638	-1.53597	true	0.190092	true	3	13			1.34541	0.938551	85.7096			N	N	N	N	N
58	C10	false	w7-HBx	mTAT	UNKNOWN	SYBR	None	1.47709	1.41605	1.54077	19.673	19.647	0.0190547		0.562858	0.0219316	-0.562761	true	0.190092	true	3	14			1.34725	0.962594	85.7096			N	N	N	N	N
59	C11	false	w7-HBx	mTAT	UNKNOWN	SYBR	None	1.47709	1.41605	1.54077	19.61	19.647	0.0190547		0.562858	0.0219316	-0.562761	true	0.190092	true	3	14			1.34856	0.962401	85.7096			N	N	N	N	N
60	C12	false	w7-HBx	mTAT	UNKNOWN	SYBR	None	1.47709	1.41605	1.54077	19.658	19.647	0.0190547		0.562858	0.0219316	-0.562761	true	0.190092	true	3	14			1.34959	0.966659	85.7096			N	N	N	N	N
64	C16	false	w8-vec	mARG1	UNKNOWN	SYBR	None	1.27243	1.06137	1.52546	17.868	17.8594	0.0215805		-0.924654	0.0942436	-0.347585	true	0.159639	true	3	13			1.33377	0.96321	84.1684			N	N	N	N	N
65	C17	false	w8-vec	mARG1	UNKNOWN	SYBR	None	1.27243	1.06137	1.52546	17.892	17.8594	0.0215805		-0.924654	0.0942436	-0.347585	true	0.159639	true	3	13			1.33237	0.949105	84.1684			N	N	N	N	N
66	C18	false	w8-vec	mARG1	UNKNOWN	SYBR	None	1.27243	1.06137	1.52546	17.819	17.8594	0.0215805		-0.924654	0.0942436	-0.347585	true	0.159639	true	3	13			1.32929	0.967013	84.1684			N	N	N	N	N
67	C19	false	w4-HBx	mARG1	UNKNOWN	SYBR	None	1.8286	1.71189	1.95326	17.326	17.3291	0.0200837		-1.44781	0.0342693	-0.870741	true	0.159639	true	3	12			1.33901	0.971345	84.1684			N	N	N	N	N
68	C20	false	w4-HBx	mARG1	UNKNOWN	SYBR	None	1.8286	1.71189	1.95326	17.365	17.3291	0.0200837		-1.44781	0.0342693	-0.870741	true	0.159639	true	3	12			1.33161	0.951836	84.1684			N	N	N	N	N
69	C21	false	w4-HBx	mARG1	UNKNOWN	SYBR	None	1.8286	1.71189	1.95326	17.296	17.3291	0.0200837		-1.44781	0.0342693	-0.870741	true	0.159639	true	3	12			1.33319	0.970109	84.1684			N	N	N	N	N
70	C22	false	w7-HBx	mARG1	UNKNOWN	SYBR	None	1.44008	1.40929	1.47153	17.983	17.9809	0.00285788		-1.10321	0.0112285	-0.526145	true	0.159639	true	3	13			1.33738	0.958314	84.1684			N	N	N	N	N
71	C23	false	w7-HBx	mARG1	UNKNOWN	SYBR	None	1.44008	1.40929	1.47153	17.984	17.9809	0.00285788		-1.10321	0.0112285	-0.526145	true	0.159639	true	3	13			1.33131	0.962645	84.1684			N	N	N	N	N
72	C24	false	w7-HBx	mARG1	UNKNOWN	SYBR	None	1.44008	1.40929	1.47153	17.975	17.9809	0.00285788		-1.10321	0.0112285	-0.526145	true	0.159639	true	3	13			1.32832	0.961728	84.1684			N	N	N	N	N
88	D16	false	w8-vec	mC8A	UNKNOWN	SYBR	None	0.937166	0.781139	1.12436	21.743	21.7028	0.023197		2.91868	0.0946268	0.0936228	true	0.185758	true	3	17			1.3483	0.961704	83.6546			N	N	N	N	N
89	D17	false	w8-vec	mC8A	UNKNOWN	SYBR	None	0.937166	0.781139	1.12436	21.663	21.7028	0.023197		2.91868	0.0946268	0.0936228	true	0.185758	true	3	16			1.34881	0.97311	83.6546			N	N	N	N	N
90	D18	false	w8-vec	mC8A	UNKNOWN	SYBR	None	0.937166	0.781139	1.12436	21.703	21.7028	0.023197		2.91868	0.0946268	0.0936228	true	0.185758	true	3	16			1.3465	0.971555	83.6546			N	N	N	N	N
91	D19	false	w4-HBx	mC8A	UNKNOWN	SYBR	None	1.23645	1.11681	1.3689	21.238	21.2957	0.0450026		2.51886	0.0528797	-0.306203	true	0.185758	true	3	16			1.3449	0.966642	83.6546			N	N	N	N	N
92	D20	false	w4-HBx	mC8A	UNKNOWN	SYBR	None	1.23645	1.11681	1.3689	21.265	21.2957	0.0450026		2.51886	0.0528797	-0.306203	true	0.185758	true	3	16			1.34684	0.967082	83.6546			N	N	N	N	N
93	D21	false	w4-HBx	mC8A	UNKNOWN	SYBR	None	1.23645	1.11681	1.3689	21.384	21.2957	0.0450026		2.51886	0.0528797	-0.306203	true	0.185758	true	3	16			1.34522	0.96676	83.6546			N	N	N	N	N
94	D22	false	w7-HBx	mC8A	UNKNOWN	SYBR	None	1.61491	1.52497	1.71016	21.2	21.2177	0.0277253		2.1336	0.0297759	-0.691456	true	0.185758	true	3	16			1.34337	0.954808	83.6546			N	N	N	N	N
95	D23	false	w7-HBx	mC8A	UNKNOWN	SYBR	None	1.61491	1.52497	1.71016	21.181	21.2177	0.0277253		2.1336	0.0297759	-0.691456	true	0.185758	true	3	16			1.34148	0.965425	83.6546			N	N	N	N	N
96	D24	false	w7-HBx	mC8A	UNKNOWN	SYBR	None	1.61491	1.52497	1.71016	21.272	21.2177	0.0277253		2.1336	0.0297759	-0.691456	true	0.185758	true	3	16			1.33649	0.957936	83.6546			N	N	N	N	N
112	E16	false	w8-vec	mCPEB3	UNKNOWN	SYBR	None	0.960368	0.802428	1.1494	26.929	26.9219	0.0173326		8.13784	0.0933625	0.0583407	true	0.226017	true	3	21			1.36277	0.973253	93.6728			N	N	N	N	N
113	E17	false	w8-vec	mCPEB3	UNKNOWN	SYBR	None	0.960368	0.802428	1.1494	26.889	26.9219	0.0173326		8.13784	0.0933625	0.0583407	true	0.226017	true	3	21			1.36068	0.963279	93.6728			N	N	N	N	N
114	E18	false	w8-vec	mCPEB3	UNKNOWN	SYBR	None	0.960368	0.802428	1.1494	26.947	26.9219	0.0173326		8.13784	0.0933625	0.0583407	true	0.226017	true	3	21			1.36592	0.969507	93.6728			N	N	N	N	N
115	E19	false	w4-HBx	mCPEB3	UNKNOWN	SYBR	None	0.849654	0.789348	0.914566	27.144	27.0914	0.0263137		8.31455	0.038255	0.235053	true	0.226017	true	3	21			1.35936	0.962827	93.6728			N	N	N	N	N
116	E20	false	w4-HBx	mCPEB3	UNKNOWN	SYBR	None	0.849654	0.789348	0.914566	27.064	27.0914	0.0263137		8.31455	0.038255	0.235053	true	0.226017	true	3	21			1.35458	0.950119	93.6728			N	N	N	N	N
117	E21	false	w4-HBx	mCPEB3	UNKNOWN	SYBR	None	0.849654	0.789348	0.914566	27.066	27.0914	0.0263137		8.31455	0.038255	0.235053	true	0.226017	true	3	21			1.36818	0.963075	93.6728			N	N	N	N	N
118	E22	false	w7-HBx	mCPEB3	UNKNOWN	SYBR	None	0.844601	0.731206	0.975582	27.331	27.4073	0.0741218		8.32316	0.074913	0.243657	true	0.226017	true	3	21			1.36253	0.963664	93.6728			N	N	N	N	N
119	E23	false	w7-HBx	mCPEB3	UNKNOWN	SYBR	None	0.844601	0.731206	0.975582	27.556	27.4073	0.0741218		8.32316	0.074913	0.243657	true	0.226017	true	3	22			1.36613	0.965704	93.6728			N	N	N	N	N
120	E24	false	w7-HBx	mCPEB3	UNKNOWN	SYBR	None	0.844601	0.731206	0.975582	27.335	27.4073	0.0741218		8.32316	0.074913	0.243657	true	0.226017	true	3	22			1.36423	0.952852	93.6728			N	N	N	N	N
148	G4	false	w8-vec	mMAGEA6	UNKNOWN	SYBR	None				34.438	34.4385			15.6544			true	0.04	true	3	31			1.23461	0.950147	74.6639			N	N	N	N	Y
149	G5	false	w8-vec	mMAGEA6	UNKNOWN	SYBR	None				Undetermined	34.4385						true	0.04	true	3	39			0	0	61.3063			N	Y	N	Y	Y
150	G6	false	w8-vec	mMAGEA6	UNKNOWN	SYBR	None				Undetermined	34.4385						true	0.04	true	3	39			0	0	61.3063			N	Y	N	Y	Y
151	G7	false	w4-HBx	mMAGEA6	UNKNOWN	SYBR	None				36.107	35.1145	0.992828		16.3376	0.993217		true	0.04	true	3	33			1.11819	0.889214	82.7556			N	N	Y	N	Y
152	G8	false	w4-HBx	mMAGEA6	UNKNOWN	SYBR	None				Undetermined	35.1145	0.992828					true	0.04	true	3	39			0	0	61.4348			N	Y	N	Y	Y
153	G9	false	w4-HBx	mMAGEA6	UNKNOWN	SYBR	None				34.122	35.1145	0.992828		16.3376	0.993217		true	0.04	true	3	31			1.27543	0.949629	82.6271			N	N	Y	N	Y
154	G10	false	w7-HBx	mMAGEA6	UNKNOWN	SYBR	None				Undetermined							true	0.04	true	3	39			0	0	61.3063			N	Y	N	Y	Y
155	G11	false	w7-HBx	mMAGEA6	UNKNOWN	SYBR	None				Undetermined							true	0.04	true	3	39			0	0	61.1779			N	Y	N	Y	Y
156	G12	false	w7-HBx	mMAGEA6	UNKNOWN	SYBR	None				Undetermined							true	0.04	true	3	39			0	0	61.4348	83.2693		Y	Y	N	Y	Y
172	H4	false	w8-vec	mGNAL	UNKNOWN	SYBR	None	1.18077	0.732422	1.90359	31.305	30.8583	0.230574		12.0742	0.248154	-0.239733	true	0.226071	true	3	26			1.37386	0.971231	83.0124			N	N	N	N	N
173	H5	false	w8-vec	mGNAL	UNKNOWN	SYBR	None	1.18077	0.732422	1.90359	30.535	30.8583	0.230574		12.0742	0.248154	-0.239733	true	0.226071	true	3	25			1.37222	0.97492	83.0124			N	N	N	N	N
174	H6	false	w8-vec	mGNAL	UNKNOWN	SYBR	None	1.18077	0.732422	1.90359	30.735	30.8583	0.230574		12.0742	0.248154	-0.239733	true	0.226071	true	3	25			1.37886	0.962874	83.0124			N	N	N	N	N
175	H7	false	w4-HBx	mGNAL	UNKNOWN	SYBR	None	0.727344	0.345414	1.53158	31.145	31.5501	0.385941		12.7732	0.386938	0.45929	true	0.226071	true	3	26			1.38708	0.964285	83.0124			N	N	Y	N	N
176	H8	false	w4-HBx	mGNAL	UNKNOWN	SYBR	None	0.727344	0.345414	1.53158	31.184	31.5501	0.385941		12.7732	0.386938	0.45929	true	0.226071	true	3	26			1.38833	0.96671	83.0124			N	N	Y	N	N
177	H9	false	w4-HBx	mGNAL	UNKNOWN	SYBR	None	0.727344	0.345414	1.53158	32.322	31.5501	0.385941		12.7732	0.386938	0.45929	true	0.226071	true	3	27			1.37911	0.976088	83.0124			N	N	Y	N	N
178	H10	false	w7-HBx	mGNAL	UNKNOWN	SYBR	None	0.778132	0.395809	1.52975	31.131	31.76	0.351076		12.6759	0.351244	0.361914	true	0.226071	true	3	25			1.38192	0.957093	83.0124			N	N	Y	N	N
179	H11	false	w7-HBx	mGNAL	UNKNOWN	SYBR	None	0.778132	0.395809	1.52975	31.803	31.76	0.351076		12.6759	0.351244	0.361914	true	0.226071	true	3	26			1.37868	0.962701	83.0124			N	N	Y	N	N
180	H12	false	w7-HBx	mGNAL	UNKNOWN	SYBR	None	0.778132	0.395809	1.52975	32.345	31.76	0.351076		12.6759	0.351244	0.361914	true	0.226071	true	3	27			1.37331	0.961707	83.0124			N	N	Y	N	N
196	I4	false	w8-vec	mFAM110C	UNKNOWN	SYBR	None	1.34675	1.09967	1.64934	29.225	29.2392	0.05173		10.4551	0.105319	-0.42948	true	0.196989	true	3	24			1.34889	0.955322	90.4619			N	N	N	N	N
197	I5	false	w8-vec	mFAM110C	UNKNOWN	SYBR	None	1.34675	1.09967	1.64934	29.157	29.2392	0.05173		10.4551	0.105319	-0.42948	true	0.196989	true	3	24			1.36086	0.96747	90.4619			N	N	N	N	N
198	I6	false	w8-vec	mFAM110C	UNKNOWN	SYBR	None	1.34675	1.09967	1.64934	29.335	29.2392	0.05173		10.4551	0.105319	-0.42948	true	0.196989	true	3	24			1.36206	0.96176	90.4619			N	N	N	N	N
199	I7	false	w4-HBx	mFAM110C	UNKNOWN	SYBR	None	1.11421	0.984271	1.26131	29.458	29.5054	0.0581431		10.7286	0.0644333	-0.156024	true	0.196989	true	3	24			1.36109	0.958168	90.4619			N	N	N	N	N
200	I8	false	w4-HBx	mFAM110C	UNKNOWN	SYBR	None	1.11421	0.984271	1.26131	29.621	29.5054	0.0581431		10.7286	0.0644333	-0.156024	true	0.196989	true	3	24			1.36147	0.960375	90.4619			N	N	N	N	N
201	I9	false	w4-HBx	mFAM110C	UNKNOWN	SYBR	None	1.11421	0.984271	1.26131	29.437	29.5054	0.0581431		10.7286	0.0644333	-0.156024	true	0.196989	true	3	24			1.36077	0.971397	90.4619			N	N	N	N	N
202	I10	false	w7-HBx	mFAM110C	UNKNOWN	SYBR	None	1.87776	1.6255	2.16917	29.128	29.0597	0.0741716		9.97556	0.0749622	-0.909016	true	0.196989	true	3	24			1.35833	0.966866	90.4619			N	N	N	N	N
203	I11	false	w7-HBx	mFAM110C	UNKNOWN	SYBR	None	1.87776	1.6255	2.16917	29.14	29.0597	0.0741716		9.97556	0.0749622	-0.909016	true	0.196989	true	3	24			1.35962	0.965636	90.4619			N	N	N	N	N
204	I12	false	w7-HBx	mFAM110C	UNKNOWN	SYBR	None	1.87776	1.6255	2.16917	28.912	29.0597	0.0741716		9.97556	0.0749622	-0.909016	true	0.196989	true	3	23			1.36323	0.967609	90.4619			N	N	N	N	N
208	I16	false	w8-vec	HBx	UNKNOWN	SYBR	None	1.28913	0.87495	1.89937	29.927	30.1277	0.179272		11.3436	0.201382	-0.366398	true	0.202329	true	3	24			1.36644	0.977002	81.2143			N	N	N	N	N
209	I17	false	w8-vec	HBx	UNKNOWN	SYBR	None	1.28913	0.87495	1.89937	30.485	30.1277	0.179272		11.3436	0.201382	-0.366398	true	0.202329	true	3	25			1.36497	0.972608	81.2143			N	N	N	N	N
210	I18	false	w8-vec	HBx	UNKNOWN	SYBR	None	1.28913	0.87495	1.89937	29.97	30.1277	0.179272		11.3436	0.201382	-0.366398	true	0.202329	true	3	24			1.37012	0.969701	81.2143			N	N	N	N	N
211	I19	false	w4-HBx	HBx	UNKNOWN	SYBR	None	3234.71	2939.27	3559.85	18.781	18.8275	0.0413019		0.0505848	0.0497682	-11.6594	true	0.202329	true	3	13			1.37309	0.969735	81.4712			N	N	N	N	N
212	I20	false	w4-HBx	HBx	UNKNOWN	SYBR	None	3234.71	2939.27	3559.85	18.792	18.8275	0.0413019		0.0505848	0.0497682	-11.6594	true	0.202329	true	3	13			1.37199	0.956354	81.4712			N	N	N	N	N
213	I21	false	w4-HBx	HBx	UNKNOWN	SYBR	None	3234.71	2939.27	3559.85	18.91	18.8275	0.0413019		0.0505848	0.0497682	-11.6594	true	0.202329	true	3	14			1.37269	0.956485	81.4712			N	N	N	N	N
214	I22	false	w7-HBx	HBx	UNKNOWN	SYBR	None	12038	11462.4	12642.4	17.246	17.2388	0.0230248		-1.8453	0.0254569	-13.5553	true	0.202329	true	3	12			1.37334	0.950515	81.4712			N	N	N	N	N
215	I23	false	w7-HBx	HBx	UNKNOWN	SYBR	None	12038	11462.4	12642.4	17.196	17.2388	0.0230248		-1.8453	0.0254569	-13.5553	true	0.202329	true	3	12			1.37219	0.94005	81.4712			N	N	N	N	N
216	I24	false	w7-HBx	HBx	UNKNOWN	SYBR	None	12038	11462.4	12642.4	17.275	17.2388	0.0230248		-1.8453	0.0254569	-13.5553	true	0.202329	true	3	12			1.36551	0.943523	81.4712			N	N	N	N	N
292	M4	false	w8-vec	mANGPTL6	UNKNOWN	SYBR	None	1.55239	1.29069	1.86714	26.823	26.8288	0.0280411		8.04466	0.0959293	-0.63449	true	0.194287	true	3	21			1.3814	0.957824	88.5353			N	N	N	N	N
293	M5	false	w8-vec	mANGPTL6	UNKNOWN	SYBR	None	1.55239	1.29069	1.86714	26.783	26.8288	0.0280411		8.04466	0.0959293	-0.63449	true	0.194287	true	3	21			1.38435	0.971607	88.5353			N	N	N	N	N
294	M6	false	w8-vec	mANGPTL6	UNKNOWN	SYBR	None	1.55239	1.29069	1.86714	26.88	26.8288	0.0280411		8.04466	0.0959293	-0.63449	true	0.194287	true	3	21			1.38539	0.970427	88.5353			N	N	N	N	N
295	M7	false	w4-HBx	mANGPTL6	UNKNOWN	SYBR	None	1.88849	1.75983	2.02656	26.587	26.5388	0.0239434		7.76192	0.0366649	-0.917236	true	0.194287	true	3	21			1.38577	0.962479	88.4068			N	N	N	N	N
296	M8	false	w4-HBx	mANGPTL6	UNKNOWN	SYBR	None	1.88849	1.75983	2.02656	26.512	26.5388	0.0239434		7.76192	0.0366649	-0.917236	true	0.194287	true	3	21			1.38363	0.972323	88.4068			N	N	N	N	N
297	M9	false	w4-HBx	mANGPTL6	UNKNOWN	SYBR	None	1.88849	1.75983	2.02656	26.518	26.5388	0.0239434		7.76192	0.0366649	-0.917236	true	0.194287	true	3	21			1.38147	0.96903	88.4068			N	N	N	N	N
298	M10	false	w7-HBx	mANGPTL6	UNKNOWN	SYBR	None	1.36997	1.21723	1.54187	27.198	27.3091	0.0604577		8.22501	0.0614251	-0.45414	true	0.194287	true	3	22			1.3488	0.975959	88.5353			N	N	N	N	N
299	M11	false	w7-HBx	mANGPTL6	UNKNOWN	SYBR	None	1.36997	1.21723	1.54187	27.407	27.3091	0.0604577		8.22501	0.0614251	-0.45414	true	0.194287	true	3	22			1.37914	0.968801	88.5353			N	N	N	N	N
300	M12	false	w7-HBx	mANGPTL6	UNKNOWN	SYBR	None	1.36997	1.21723	1.54187	27.322	27.3091	0.0604577		8.22501	0.0614251	-0.45414	true	0.194287	true	3	22			1.39053	0.9785	88.5353			N	N	N	N	N
316	N4	false	w8-vec	mALDOB	UNKNOWN	SYBR	None	1.87221	1.5615	2.24474	17.75	17.7882	0.0218103		-0.995855	0.0942965	-0.904739	true	0.239301	true	3	12			1.39047	0.965455	84.0399			N	N	N	N	N
317	N5	false	w8-vec	mALDOB	UNKNOWN	SYBR	None	1.87221	1.5615	2.24474	17.79	17.7882	0.0218103		-0.995855	0.0942965	-0.904739	true	0.239301	true	3	12			1.39057	0.960991	84.0399			N	N	N	N	N
318	N6	false	w8-vec	mALDOB	UNKNOWN	SYBR	None	1.87221	1.5615	2.24474	17.825	17.7882	0.0218103		-0.995855	0.0942965	-0.904739	true	0.239301	true	3	12			1.39241	0.965695	84.0399			N	N	N	N	N
319	N7	false	w4-HBx	mALDOB	UNKNOWN	SYBR	None	1.53075	1.42376	1.64579	18.022	18.0715	0.0254293		-0.705356	0.037652	-0.61424	true	0.239301	true	3	12			1.39363	0.963638	84.0399			N	N	N	N	N
320	N8	false	w4-HBx	mALDOB	UNKNOWN	SYBR	None	1.53075	1.42376	1.64579	18.085	18.0715	0.0254293		-0.705356	0.037652	-0.61424	true	0.239301	true	3	13			1.39446	0.948157	84.0399			N	N	N	N	N
321	N9	false	w4-HBx	mALDOB	UNKNOWN	SYBR	None	1.53075	1.42376	1.64579	18.107	18.0715	0.0254293		-0.705356	0.037652	-0.61424	true	0.239301	true	3	13			1.38998	0.964834	84.0399			N	N	N	N	N
322	N10	false	w7-HBx	mALDOB	UNKNOWN	SYBR	None	1.3482	1.30829	1.38934	18.584	18.562	0.0112237		-0.522155	0.0156168	-0.431039	true	0.239301	true	3	13			1.38836	0.975174	84.0399			N	N	N	N	N
323	N11	false	w7-HBx	mALDOB	UNKNOWN	SYBR	None	1.3482	1.30829	1.38934	18.551	18.562	0.0112237		-0.522155	0.0156168	-0.431039	true	0.239301	true	3	13			1.38136	0.970398	84.0399			N	N	N	N	N
324	N12	false	w7-HBx	mALDOB	UNKNOWN	SYBR	None	1.3482	1.30829	1.38934	18.551	18.562	0.0112237		-0.522155	0.0156168	-0.431039	true	0.239301	true	3	13			1.3855	0.969934	84.0399			N	N	N	N	N
340	O4	false	w8-vec	mALDH8A1	UNKNOWN	SYBR	None	2.97031	2.48167	3.55516	22.16	22.1303	0.0175011		3.34625	0.0933939	-1.57061	true	0.171586	true	3	17			1.30469	0.980225	84.5537			N	N	N	N	N
341	O5	false	w8-vec	mALDH8A1	UNKNOWN	SYBR	None	2.97031	2.48167	3.55516	22.132	22.1303	0.0175011		3.34625	0.0933939	-1.57061	true	0.171586	true	3	17			1.30991	0.975532	84.5537			N	N	N	N	N
342	O6	false	w8-vec	mALDH8A1	UNKNOWN	SYBR	None	2.97031	2.48167	3.55516	22.099	22.1303	0.0175011		3.34625	0.0933939	-1.57061	true	0.171586	true	3	17			1.31167	0.986168	84.5537			N	N	N	N	N
343	O7	false	w4-HBx	mALDH8A1	UNKNOWN	SYBR	None	3.17508	2.85534	3.53062	22.072	22.0269	0.0476535		3.25007	0.0551533	-1.66679	true	0.171586	true	3	17			1.31076	0.963836	84.5537			N	N	N	N	N
344	O8	false	w4-HBx	mALDH8A1	UNKNOWN	SYBR	None	3.17508	2.85534	3.53062	22.078	22.0269	0.0476535		3.25007	0.0551533	-1.66679	true	0.171586	true	3	17			1.31039	0.968966	84.5537			N	N	N	N	N
345	O9	false	w4-HBx	mALDH8A1	UNKNOWN	SYBR	None	3.17508	2.85534	3.53062	21.932	22.0269	0.0476535		3.25007	0.0551533	-1.66679	true	0.171586	true	3	17			1.31597	0.986078	84.5537			N	N	N	N	N
346	O10	false	w7-HBx	mALDH8A1	UNKNOWN	SYBR	None	3.30456	3.01891	3.61723	22.186	22.2765	0.0457044		3.19241	0.0469766	-1.72446	true	0.171586	true	3	17			1.30706	0.982224	84.5537			N	N	N	N	N
347	O11	false	w7-HBx	mALDH8A1	UNKNOWN	SYBR	None	3.30456	3.01891	3.61723	22.312	22.2765	0.0457044		3.19241	0.0469766	-1.72446	true	0.171586	true	3	17			1.29929	0.972724	84.5537			N	N	N	N	N
348	O12	false	w7-HBx	mALDH8A1	UNKNOWN	SYBR	None	3.30456	3.01891	3.61723	22.332	22.2765	0.0457044		3.19241	0.0469766	-1.72446	true	0.171586	true	3	17			1.30313	0.989277	84.5537			N	N	N	N	N
Analysis Type	Singleplex
Endogenous Control	mCYC
RQ Min/Max Confidence Level	95.0
Reference Sample	w1-vec

## Sheet: Melt Curve Raw Data
Block Type	384-Well Block
Calibration Background is expired	Yes
Calibration Background performed on	10-12-2018 11:47:46 PDT
Calibration FAM is expired	Yes
Calibration FAM performed on	10-23-2018 10:23:19 PDT
Calibration MELTDOCTOR is expired	Yes
Calibration MELTDOCTOR performed on	09-26-2017 21:22:46 PDT
Calibration NED is expired	Yes
Calibration NED performed on	10-23-2018 10:33:14 PDT
Calibration ROI is expired	Yes
Calibration ROI performed on	10-12-2018 09:37:21 PDT
Calibration ROX is expired	Yes
Calibration ROX performed on	10-23-2018 10:07:21 PDT
Calibration SYBR is expired	Yes
Calibration SYBR performed on	10-23-2018 09:57:53 PDT
Calibration TAMRA is expired	Yes
Calibration TAMRA performed on	10-23-2018 10:45:25 PDT
Calibration Uniformity is expired	Yes
Calibration Uniformity performed on	10-12-2018 10:06:59 PDT
Calibration VIC is expired	Yes
Calibration VIC performed on	10-23-2018 10:54:25 PDT
Chemistry	SYBR_GREEN
Date Created	02-02-2021 13:40:32 PST
Experiment File Name	D:\NZZ\2021-02-02 120723.eds
Experiment Name	2021-02-02 120723
Experiment Run End Time	02-02-2021 06:46:44 PST
Experiment Type	Comparative Cт (ΔΔCт)
Instrument Name	285880860
Instrument Serial Number	285880860
Instrument Type	QuantStudio 12K Flex
Passive Reference	ROX
Quantification Cycle Method	Ct
Signal Smoothing On	true
Stage/ Cycle where Analysis is performed	Stage 2, Step 2
Well	Well Position	Reading	Temperature	Fluorescence	Derivative
1	A1	1	60.1504	1.70491	0.0797531
1	A1	2	60.4073	1.69525	0.0795798
1	A1	3	60.6642	1.68824	0.0796439
1	A1	4	60.921	1.68364	0.0800797
1	A1	5	61.1779	1.66909	0.080982
1	A1	6	61.4348	1.66004	0.0823351
1	A1	7	61.6917	1.6486	0.0839378
1	A1	8	61.9485	1.64594	0.0853937
1	A1	9	62.2054	1.62856	0.0862228
1	A1	10	62.4623	1.62128	0.0860793
1	A1	11	62.7192	1.59972	0.0849573
1	A1	12	62.976	1.59081	0.0832188
1	A1	13	63.2329	1.5856	0.0813965
1	A1	14	63.4898	1.57986	0.0799089
1	A1	15	63.7467	1.56841	0.0788994
1	A1	16	64.0035	1.55549	0.0782985
1	A1	17	64.2604	1.54615	0.0780132
1	A1	18	64.5173	1.53155	0.0780376
1	A1	19	64.7742	1.53344	0.0783927
1	A1	20	65.0311	1.5175	0.0789692
1	A1	21	65.2879	1.51137	0.0794475
1	A1	22	65.5448	1.4996	0.0794079
1	A1	23	65.8017	1.48578	0.0785656
1	A1	24	66.0586	1.47545	0.0769673
1	A1	25	66.3154	1.46605	0.0749939
1	A1	26	66.5723	1.45824	0.0731582
1	A1	27	66.8292	1.45055	0.0718206
1	A1	28	67.0861	1.44646	0.0710124
1	A1	29	67.3429	1.43627	0.0704715
1	A1	30	67.5998	1.42156	0.0698526
1	A1	31	67.8567	1.41405	0.0689477
1	A1	32	68.1136	1.40607	0.0677799
1	A1	33	68.3705	1.39918	0.0665321
1	A1	34	68.6273	1.39204	0.0654104
1	A1	35	68.8842	1.38407	0.0645507
1	A1	36	69.1411	1.37228	0.0640009
1	A1	37	69.398	1.36667	0.0637328
1	A1	38	69.6548	1.36142	0.0636466
1	A1	39	69.9117	1.35349	0.0635667
1	A1	40	70.1686	1.3426	0.0632812
1	A1	41	70.4255	1.33421	0.062629
1	A1	42	70.6823	1.32871	0.0615999
1	A1	43	70.9392	1.31812	0.0603802
1	A1	44	71.1961	1.31172	0.0593059
1	A1	45	71.453	1.30278	0.0587301
1	A1	46	71.7099	1.30295	0.0588766
1	A1	47	71.9667	1.29344	0.0597586
1	A1	48	72.2236	1.28332	0.0611862
1	A1	49	72.4805	1.27779	0.0628538
1	A1	50	72.7374	1.26914	0.0644373
1	A1	51	72.9942	1.25852	0.065674
1	A1	52	73.2511	1.2567	0.0664214
1	A1	53	73.508	1.24146	0.0667132
1	A1	54	73.7649	1.23007	0.0667836
1	A1	55	74.0217	1.22894	0.0670002
1	A1	56	74.2786	1.21625	0.0676992
1	A1	57	74.5355	1.21431	0.0689942
1	A1	58	74.7924	1.20329	0.0706808
1	A1	59	75.0492	1.19597	0.0723135
1	A1	60	75.3061	1.18079	0.0734207
1	A1	61	75.563	1.17289	0.0737273
1	A1	62	75.8199	1.16248	0.0732599
1	A1	63	76.0768	1.15475	0.0722972
1	A1	64	76.3336	1.1458	0.0712118
1	A1	65	76.5905	1.1375	0.0703165
1	A1	66	76.8474	1.12858	0.0697697
1	A1	67	77.1043	1.12228	0.0695727
1	A1	68	77.3611	1.11083	0.0696186
1	A1	69	77.618	1.10303	0.0697694
1	A1	70	77.8749	1.09532	0.0699143
1	A1	71	78.1318	1.08608	0.0700072
1	A1	72	78.3886	1.07507	0.0700725
1	A1	73	78.6455	1.07043	0.0701793
1	A1	74	78.9024	1.05686	0.0703973
1	A1	75	79.1593	1.05506	0.070761
1	A1	76	79.4162	1.04093	0.0712648
1	A1	77	79.673	1.03365	0.0718941
1	A1	78	79.9299	1.02384	0.072673
1	A1	79	80.1868	1.01567	0.0736971
1	A1	80	80.4437	1.00604	0.0751196
1	A1	81	80.7005	0.998834	0.0771036
1	A1	82	80.9574	0.985927	0.0797517
1	A1	83	81.2143	0.97928	0.0830439
1	A1	84	81.4712	0.969662	0.086814
1	A1	85	81.728	0.957212	0.0908081
1	A1	86	81.9849	0.943349	0.0948482
1	A1	87	82.2418	0.932947	0.0990974
1	A1	88	82.4987	0.918208	0.104399
1	A1	89	82.7556	0.90576	0.112616
1	A1	90	83.0124	0.892245	0.126854
1	A1	91	83.2693	0.881776	0.151382
1	A1	92	83.5262	0.870339	0.190987
1	A1	93	83.7831	0.854753	0.249568
1	A1	94	84.0399	0.838129	0.328025
1	A1	95	84.2968	0.807924	0.422042
1	A1	96	84.5537	0.766593	0.520903
1	A1	97	84.8106	0.683792	0.608556
1	A1	98	85.0674	0.538246	0.667355
1	A1	99	85.3243	0.386236	0.683493
1	A1	100	85.5812	0.24923	0.651865
1	A1	101	85.8381	0.154853	0.578046
1	A1	102	86.0949	0.107116	0.47635
1	A1	103	86.3518	0.0878291	0.36494
1	A1	104	86.6087	0.0813117	0.2603
1	A1	105	86.8656	0.07803	0.173358
1	A1	106	87.1225	0.0752272	0.108364
1	A1	107	87.3793	0.0734335	0.0641492
1	A1	108	87.6362	0.0730395	0.0365156
1	A1	109	87.8931	0.0724796	0.0205012
1	A1	110	88.15	0.0724703	0.0118118
1	A1	111	88.4068	0.0719193	0.00735438
1	A1	112	88.6637	0.0713284	0.00516955
1	A1	113	88.9206	0.0712101	0.00412666
1	A1	114	89.1775	0.0703136	0.00361616
1	A1	115	89.4343	0.0700626	0.00332828
1	A1	116	89.6912	0.069692	0.00311603
1	A1	117	89.9481	0.0698155	0.00291494
1	A1	118	90.205	0.0685731	0.00269953
1	A1	119	90.4619	0.0690732	0.00246535
1	A1	120	90.7187	0.0683014	0.00222606
1	A1	121	90.9756	0.0678032	0.00201162
1	A1	122	91.2325	0.0684502	0.00185648
1	A1	123	91.4894	0.0680575	0.0017793
1	A1	124	91.7462	0.0684759	0.00176829
1	A1	125	92.0031	0.0669473	0.00178674
1	A1	126	92.26	0.0669656	0.00179719
1	A1	127	92.5169	0.067174	0.00178683
1	A1	128	92.7737	0.0665216	0.00177323
1	A1	129	93.0306	0.0669633	0.00178516
1	A1	130	93.2875	0.0665128	0.00183256
1	A1	131	93.5444	0.0661347	0.00188761
1	A1	132	93.8013	0.0660111	0.001891
1	A1	133	94.0581	0.0656143	0.00178169
1	A1	134	94.315	0.0643494	0.00153326
1	A1	135	94.5719	0.0647779	0.00117393
1	A1	136	94.8288	0.0657374	0.000776464
2	A2	1	60.1504	1.71897	0.0800321
2	A2	2	60.4073	1.70784	0.0805582
2	A2	3	60.6642	1.69768	0.0810981
2	A2	4	60.921	1.6957	0.0815584
2	A2	5	61.1779	1.67555	0.0819008
2	A2	6	61.4348	1.66881	0.0821391
2	A2	7	61.6917	1.66054	0.082288
2	A2	8	61.9485	1.64854	0.0823248
2	A2	9	62.2054	1.63967	0.0821859
2	A2	10	62.4623	1.62588	0.0818252
2	A2	11	62.7192	1.61868	0.0812823
2	A2	12	62.976	1.60332	0.0806958
2	A2	13	63.2329	1.59571	0.0802407
2	A2	14	63.4898	1.59067	0.0800292
2	A2	15	63.7467	1.57617	0.0800483
2	A2	16	64.0035	1.56784	0.0801759
2	A2	17	64.2604	1.55476	0.0802557
2	A2	18	64.5173	1.54669	0.0801622
2	A2	19	64.7742	1.53551	0.0798218
2	A2	20	65.0311	1.52713	0.0792025
2	A2	21	65.2879	1.51576	0.0782958
2	A2	22	65.5448	1.50257	0.0771306
2	A2	23	65.8017	1.49817	0.0757943
2	A2	24	66.0586	1.48636	0.0744436
2	A2	25	66.3154	1.47575	0.0732744
2	A2	26	66.5723	1.46701	0.0724457
2	A2	27	66.8292	1.45975	0.0719856
2	A2	28	67.0861	1.45329	0.071742
2	A2	29	67.3429	1.44469	0.0714371
2	A2	30	67.5998	1.42886	0.0708148
2	A2	31	67.8567	1.42206	0.0697952
2	A2	32	68.1136	1.41179	0.0685311
2	A2	33	68.3705	1.40658	0.0673225
2	A2	34	68.6273	1.39857	0.0664535
2	A2	35	68.8842	1.38818	0.0660537
2	A2	36	69.1411	1.38233	0.0660399
2	A2	37	69.398	1.37422	0.066154
2	A2	38	69.6548	1.36465	0.0660759
2	A2	39	69.9117	1.35609	0.0655536
2	A2	40	70.1686	1.34663	0.0645128
2	A2	41	70.4255	1.33519	0.0630916
2	A2	42	70.6823	1.33253	0.0615909
2	A2	43	70.9392	1.32303	0.060355
2	A2	44	71.1961	1.31649	0.0596469
2	A2	45	71.453	1.30961	0.0595765
2	A2	46	71.7099	1.30348	0.0600858
2	A2	47	71.9667	1.29398	0.0610011
2	A2	48	72.2236	1.28813	0.0620948
2	A2	49	72.4805	1.27739	0.0631435
2	A2	50	72.7374	1.27178	0.0639783
2	A2	51	72.9942	1.26198	0.0645238
2	A2	52	73.2511	1.25377	0.0648218
2	A2	53	73.508	1.24341	0.0650226
2	A2	54	73.7649	1.23723	0.0653201
2	A2	55	74.0217	1.22907	0.0658535
2	A2	56	74.2786	1.22309	0.0666288
2	A2	57	74.5355	1.21424	0.067516
2	A2	58	74.7924	1.20298	0.0683325
2	A2	59	75.0492	1.19141	0.0689368
2	A2	60	75.3061	1.18723	0.0692863
2	A2	61	75.563	1.17857	0.0694244
2	A2	62	75.8199	1.16738	0.0694379
2	A2	63	76.0768	1.15748	0.0694307
2	A2	64	76.3336	1.1517	0.0695115
2	A2	65	76.5905	1.14092	0.0697707
2	A2	66	76.8474	1.1325	0.0702352
2	A2	67	77.1043	1.12533	0.0708261
2	A2	68	77.3611	1.11677	0.0713728
2	A2	69	77.618	1.10619	0.0716899
2	A2	70	77.8749	1.0931	0.0716793
2	A2	71	78.1318	1.08681	0.0713881
2	A2	72	78.3886	1.07932	0.0709786
2	A2	73	78.6455	1.06862	0.0706362
2	A2	74	78.9024	1.06271	0.0704831
2	A2	75	79.1593	1.05112	0.0705501
2	A2	76	79.4162	1.04209	0.070808
2	A2	77	79.673	1.03477	0.0712287
2	A2	78	79.9299	1.02714	0.0718371
2	A2	79	80.1868	1.01302	0.0727362
2	A2	80	80.4437	1.00631	0.0740953
2	A2	81	80.7005	1.00002	0.076101
2	A2	82	80.9574	0.988223	0.0788875
2	A2	83	81.2143	0.978569	0.0824673
2	A2	84	81.4712	0.969372	0.0867001
2	A2	85	81.728	0.956872	0.0913248
2	A2	86	81.9849	0.945085	0.0960921
2	A2	87	82.2418	0.935205	0.101034
2	A2	88	82.4987	0.91466	0.106855
2	A2	89	82.7556	0.902634	0.11537
2	A2	90	83.0124	0.88939	0.129802
2	A2	91	83.2693	0.87846	0.154689
2	A2	92	83.5262	0.866129	0.195118
2	A2	93	83.7831	0.85082	0.255128
2	A2	94	84.0399	0.834619	0.335439
2	A2	95	84.2968	0.805579	0.431214
2	A2	96	84.5537	0.758922	0.531039
2	A2	97	84.8106	0.6667	0.618292
2	A2	98	85.0674	0.516675	0.675177
2	A2	99	85.3243	0.360864	0.688259
2	A2	100	85.5812	0.224591	0.653179
2	A2	101	85.8381	0.129855	0.576314
2	A2	102	86.0949	0.0820988	0.472543
2	A2	103	86.3518	0.0648707	0.360215
2	A2	104	86.6087	0.0576281	0.255662
2	A2	105	86.8656	0.0552137	0.169477
2	A2	106	87.1225	0.0530591	0.105545
2	A2	107	87.3793	0.0503525	0.0624046
2	A2	108	87.6362	0.0502395	0.0356708
2	A2	109	87.8931	0.0497437	0.0202931
2	A2	110	88.15	0.0491526	0.0119633
2	A2	111	88.4068	0.0482754	0.00762554
2	A2	112	88.6637	0.0483528	0.00538997
2	A2	113	88.9206	0.047344	0.0042091
2	A2	114	89.1775	0.0475773	0.00355185
2	A2	115	89.4343	0.0466342	0.00316541
2	A2	116	89.6912	0.0469158	0.00292886
2	A2	117	89.9481	0.0463941	0.00277421
2	A2	118	90.205	0.046112	0.0026529
2	A2	119	90.4619	0.0454034	0.00253078
2	A2	120	90.7187	0.0451093	0.00239371
2	A2	121	90.9756	0.044964	0.002248
2	A2	122	91.2325	0.0449916	0.00210794
2	A2	123	91.4894	0.044904	0.00197905
2	A2	124	91.7462	0.044459	0.00185254
2	A2	125	92.0031	0.0437551	0.0017179
2	A2	126	92.26	0.0434285	0.00158276
2	A2	127	92.5169	0.0439145	0.00147923
2	A2	128	92.7737	0.0442091	0.00144663
2	A2	129	93.0306	0.0435622	0.00150221
2	A2	130	93.2875	0.0432077	0.00162189
2	A2	131	93.5444	0.0430273	0.00174477
2	A2	132	93.8013	0.0427404	0.00179783
2	A2	133	94.0581	0.0424741	0.00172604
2	A2	134	94.315	0.0417183	0.00151392
2	A2	135	94.5719	0.0416189	0.00119159
2	A2	136	94.8288	0.0421761	0.000822713
3	A3	1	60.1504	1.76854	0.0837876
3	A3	2	60.4073	1.75938	0.0844751
3	A3	3	60.6642	1.74159	0.0848237
3	A3	4	60.921	1.73246	0.0847408
3	A3	5	61.1779	1.72838	0.0843397
3	A3	6	61.4348	1.71139	0.0838784
3	A3	7	61.6917	1.70385	0.0836289
3	A3	8	61.9485	1.69144	0.0837544
3	A3	9	62.2054	1.6851	0.0842414
3	A3	10	62.4623	1.67226	0.0848957
3	A3	11	62.7192	1.6614	0.0854116
3	A3	12	62.976	1.64867	0.0854808
3	A3	13	63.2329	1.64002	0.0849188
3	A3	14	63.4898	1.62599	0.0837506
3	A3	15	63.7467	1.61253	0.0822123
3	A3	16	64.0035	1.60482	0.0806595
3	A3	17	64.2604	1.5996	0.079428
3	A3	18	64.5173	1.58567	0.0787086
3	A3	19	64.7742	1.57437	0.0784876
3	A3	20	65.0311	1.569	0.0785705
3	A3	21	65.2879	1.55738	0.0786613
3	A3	22	65.5448	1.54705	0.0784887
3	A3	23	65.8017	1.53508	0.07792
3	A3	24	66.0586	1.52431	0.0770245
3	A3	25	66.3154	1.51329	0.0760329
3	A3	26	66.5723	1.5089	0.0752112
3	A3	27	66.8292	1.4986	0.0747217
3	A3	28	67.0861	1.48806	0.0745466
3	A3	29	67.3429	1.47774	0.0745171
3	A3	30	67.5998	1.47075	0.074412
3	A3	31	67.8567	1.46071	0.074076
3	A3	32	68.1136	1.44593	0.0734843
3	A3	33	68.3705	1.44033	0.0727344
3	A3	34	68.6273	1.4322	0.0719641
3	A3	35	68.8842	1.42085	0.0712549
3	A3	36	69.1411	1.41584	0.0705871
3	A3	37	69.398	1.40274	0.0698754
3	A3	38	69.6548	1.3968	0.0690679
3	A3	39	69.9117	1.38301	0.0682146
3	A3	40	70.1686	1.3766	0.0674495
3	A3	41	70.4255	1.36958	0.0668888
3	A3	42	70.6823	1.36412	0.0665275
3	A3	43	70.9392	1.35321	0.0662239
3	A3	44	71.1961	1.3424	0.0658006
3	A3	45	71.453	1.33639	0.0651833
3	A3	46	71.7099	1.32265	0.0644724
3	A3	47	71.9667	1.3211	0.0638979
3	A3	48	72.2236	1.31104	0.0636899
3	A3	49	72.4805	1.30395	0.0639584
3	A3	50	72.7374	1.29595	0.0646541
3	A3	51	72.9942	1.28735	0.0656163
3	A3	52	73.2511	1.27806	0.066663
3	A3	53	73.508	1.27038	0.0676654
3	A3	54	73.7649	1.26008	0.0685691
3	A3	55	74.0217	1.25178	0.0693786
3	A3	56	74.2786	1.24445	0.0701169
3	A3	57	74.5355	1.23351	0.0708046
3	A3	58	74.7924	1.22519	0.0714539
3	A3	59	75.0492	1.21499	0.0720786
3	A3	60	75.3061	1.20553	0.0726867
3	A3	61	75.563	1.19889	0.0732646
3	A3	62	75.8199	1.18688	0.0737574
3	A3	63	76.0768	1.17786	0.0740789
3	A3	64	76.3336	1.16777	0.0741509
3	A3	65	76.5905	1.16066	0.0739543
3	A3	66	76.8474	1.14439	0.0735577
3	A3	67	77.1043	1.14066	0.0730924
3	A3	68	77.3611	1.1298	0.0726918
3	A3	69	77.618	1.12285	0.0724227
3	A3	70	77.8749	1.11311	0.0722724
3	A3	71	78.1318	1.10088	0.0721793
3	A3	72	78.3886	1.09261	0.0720862
3	A3	73	78.6455	1.08521	0.0719654
3	A3	74	78.9024	1.07678	0.0718281
3	A3	75	79.1593	1.0654	0.0717249
3	A3	76	79.4162	1.05542	0.0717579
3	A3	77	79.673	1.04775	0.0720766
3	A3	78	79.9299	1.03838	0.0728284
3	A3	79	80.1868	1.03117	0.0740861
3	A3	80	80.4437	1.0226	0.0758102
3	A3	81	80.7005	1.01092	0.0778804
3	A3	82	80.9574	0.997613	0.0801838
3	A3	83	81.2143	0.991699	0.0826844
3	A3	84	81.4712	0.977856	0.0854281
3	A3	85	81.728	0.969227	0.0885015
3	A3	86	81.9849	0.959116	0.0920423
3	A3	87	82.2418	0.944125	0.0963973
3	A3	88	82.4987	0.933037	0.102466
3	A3	89	82.7556	0.917537	0.112146
3	A3	90	83.0124	0.90553	0.128687
3	A3	91	83.2693	0.893577	0.156637
3	A3	92	83.5262	0.881088	0.201071
3	A3	93	83.7831	0.867332	0.265876
3	A3	94	84.0399	0.846933	0.351329
3	A3	95	84.2968	0.81848	0.451762
3	A3	96	84.5537	0.772003	0.55469
3	A3	97	84.8106	0.660955	0.642553
3	A3	98	85.0674	0.501347	0.6972
3	A3	99	85.3243	0.344705	0.705672
3	A3	100	85.5812	0.206068	0.664789
3	A3	101	85.8381	0.113963	0.582331
3	A3	102	86.0949	0.0689234	0.474271
3	A3	103	86.3518	0.0516244	0.359408
3	A3	104	86.6087	0.0443942	0.2539
3	A3	105	86.8656	0.0420132	0.167791
3	A3	106	87.1225	0.0384324	0.10437
3	A3	107	87.3793	0.0369479	0.0617439
3	A3	108	87.6362	0.0359485	0.0353338
3	A3	109	87.8931	0.0356589	0.0200805
3	A3	110	88.15	0.0348466	0.0117638
3	A3	111	88.4068	0.0348416	0.00742824
3	A3	112	88.6637	0.03483	0.00524408
3	A3	113	88.9206	0.0339432	0.00416743
3	A3	114	89.1775	0.033202	0.00362806
3	A3	115	89.4343	0.0328295	0.00332363
3	A3	116	89.6912	0.0331352	0.00310534
3	A3	117	89.9481	0.0319968	0.00291518
3	A3	118	90.205	0.0318797	0.00274578
3	A3	119	90.4619	0.0316415	0.00261043
3	A3	120	90.7187	0.0316405	0.00252111
3	A3	121	90.9756	0.0311675	0.00247573
3	A3	122	91.2325	0.0309168	0.00245711
3	A3	123	91.4894	0.0301626	0.00244277
3	A3	124	91.7462	0.0302051	0.00241938
3	A3	125	92.0031	0.0296238	0.00239168
3	A3	126	92.26	0.0300139	0.00237976
3	A3	127	92.5169	0.0287024	0.00240525
3	A3	128	92.7737	0.0294112	0.00247451
3	A3	129	93.0306	0.0290653	0.00256848
3	A3	130	93.2875	0.0278711	0.00264564
3	A3	131	93.5444	0.0276315	0.00265675
3	A3	132	93.8013	0.0272274	0.00256266
3	A3	133	94.0581	0.0273402	0.00234575
3	A3	134	94.315	0.0270278	0.00201268
3	A3	135	94.5719	0.0260121	0.00159269
3	A3	136	94.8288	0.0261107	0.00113434
4	A4	1	60.1504	1.74117	0.078121
4	A4	2	60.4073	1.73492	0.0787702
4	A4	3	60.6642	1.7244	0.0790711
4	A4	4	60.921	1.71332	0.0788596
4	A4	5	61.1779	1.69785	0.0782332
4	A4	6	61.4348	1.69353	0.0775261
4	A4	7	61.6917	1.68181	0.0771256
4	A4	8	61.9485	1.67457	0.07725
4	A4	9	62.2054	1.66781	0.0778336
4	A4	10	62.4623	1.65547	0.0785925
4	A4	11	62.7192	1.64193	0.07921
4	A4	12	62.976	1.63008	0.0794934
4	A4	13	63.2329	1.62366	0.0794226
4	A4	14	63.4898	1.61229	0.0790685
4	A4	15	63.7467	1.60353	0.0785138
4	A4	16	64.0035	1.59119	0.0778266
4	A4	17	64.2604	1.58129	0.0770987
4	A4	18	64.5173	1.56968	0.0764611
4	A4	19	64.7742	1.56193	0.0760369
4	A4	20	65.0311	1.55513	0.0758485
4	A4	21	65.2879	1.54278	0.0757637
4	A4	22	65.5448	1.53477	0.0755456
4	A4	23	65.8017	1.52242	0.0749862
4	A4	24	66.0586	1.512	0.0740399
4	A4	25	66.3154	1.5005	0.0728625
4	A4	26	66.5723	1.49576	0.0717316
4	A4	27	66.8292	1.48516	0.0709023
4	A4	28	67.0861	1.47743	0.070491
4	A4	29	67.3429	1.46926	0.0704452
4	A4	30	67.5998	1.45714	0.0705882
4	A4	31	67.8567	1.4504	0.070694
4	A4	32	68.1136	1.44095	0.0705488
4	A4	33	68.3705	1.42981	0.0699864
4	A4	34	68.6273	1.42209	0.0689159
4	A4	35	68.8842	1.41304	0.0673512
4	A4	36	69.1411	1.40256	0.0654182
4	A4	37	69.398	1.39188	0.0633229
4	A4	38	69.6548	1.39013	0.061273
4	A4	39	69.9117	1.37938	0.0593917
4	A4	40	70.1686	1.37404	0.0576706
4	A4	41	70.4255	1.36315	0.0560095
4	A4	42	70.6823	1.35913	0.05431
4	A4	43	70.9392	1.35089	0.052586
4	A4	44	71.1961	1.34318	0.0510199
4	A4	45	71.453	1.336	0.0499335
4	A4	46	71.7099	1.33204	0.0496656
4	A4	47	71.9667	1.32818	0.0504277
4	A4	48	72.2236	1.32339	0.0522011
4	A4	49	72.4805	1.31356	0.0547437
4	A4	50	72.7374	1.30714	0.0576829
4	A4	51	72.9942	1.29879	0.0606393
4	A4	52	73.2511	1.29179	0.0633206
4	A4	53	73.508	1.28211	0.0655529
4	A4	54	73.7649	1.27153	0.0672755
4	A4	55	74.0217	1.2642	0.0685082
4	A4	56	74.2786	1.25536	0.0693252
4	A4	57	74.5355	1.24574	0.0698296
4	A4	58	74.7924	1.23484	0.0701339
4	A4	59	75.0492	1.22741	0.0703407
4	A4	60	75.3061	1.21933	0.0705194
4	A4	61	75.563	1.20805	0.0706932
4	A4	62	75.8199	1.20074	0.0708444
4	A4	63	76.0768	1.19097	0.0709462
4	A4	64	76.3336	1.17961	0.0709949
4	A4	65	76.5905	1.17242	0.0710255
4	A4	66	76.8474	1.16282	0.071094
4	A4	67	77.1043	1.15384	0.071243
4	A4	68	77.3611	1.14552	0.0714839
4	A4	69	77.618	1.13354	0.0718022
4	A4	70	77.8749	1.12905	0.0721859
4	A4	71	78.1318	1.11311	0.0726376
4	A4	72	78.3886	1.10982	0.0731634
4	A4	73	78.6455	1.0958	0.073731
4	A4	74	78.9024	1.09201	0.074244
4	A4	75	79.1593	1.07801	0.0745631
4	A4	76	79.4162	1.0678	0.0745858
4	A4	77	79.673	1.05818	0.0743456
4	A4	78	79.9299	1.04919	0.0740684
4	A4	79	80.1868	1.03808	0.0741469
4	A4	80	80.4437	1.03039	0.075034
4	A4	81	80.7005	1.02408	0.0771061
4	A4	82	80.9574	1.01332	0.0805506
4	A4	83	81.2143	1.00274	0.0853082
4	A4	84	81.4712	0.990345	0.091077
4	A4	85	81.728	0.982415	0.0973823
4	A4	86	81.9849	0.966916	0.103744
4	A4	87	82.2418	0.950718	0.109982
4	A4	88	82.4987	0.934465	0.116667
4	A4	89	82.7556	0.918218	0.125626
4	A4	90	83.0124	0.902527	0.140293
4	A4	91	83.2693	0.886972	0.165601
4	A4	92	83.5262	0.87821	0.207089
4	A4	93	83.7831	0.860164	0.269041
4	A4	94	84.0399	0.844301	0.351937
4	A4	95	84.2968	0.814738	0.45009
4	A4	96	84.5537	0.766807	0.550833
4	A4	97	84.8106	0.654322	0.636409
4	A4	98	85.0674	0.495281	0.688613
4	A4	99	85.3243	0.335898	0.694648
4	A4	100	85.5812	0.19865	0.651675
4	A4	101	85.8381	0.109591	0.567863
4	A4	102	86.0949	0.0678035	0.459446
4	A4	103	86.3518	0.0529791	0.345258
4	A4	104	86.6087	0.0468895	0.24126
4	A4	105	86.8656	0.0447648	0.15717
4	A4	106	87.1225	0.0431175	0.0959397
4	A4	107	87.3793	0.041899	0.055415
4	A4	108	87.6362	0.0419721	0.030845
4	A4	109	87.8931	0.0410757	0.0170713
4	A4	110	88.15	0.0398186	0.00982823
4	A4	111	88.4068	0.0398807	0.00617125
4	A4	112	88.6637	0.0393104	0.00434311
4	A4	113	88.9206	0.039522	0.00341692
4	A4	114	89.1775	0.0393752	0.00294286
4	A4	115	89.4343	0.0386032	0.00270121
4	A4	116	89.6912	0.0381866	0.00257246
4	A4	117	89.9481	0.0378216	0.00248774
4	A4	118	90.205	0.0375916	0.0024128
4	A4	119	90.4619	0.0377479	0.00233528
4	A4	120	90.7187	0.0371959	0.00225014
4	A4	121	90.9756	0.0365686	0.00215212
4	A4	122	91.2325	0.0365845	0.0020401
4	A4	123	91.4894	0.0361981	0.0019258
4	A4	124	91.7462	0.035802	0.001834
4	A4	125	92.0031	0.0363655	0.00178977
4	A4	126	92.26	0.0359895	0.00180145
4	A4	127	92.5169	0.0354094	0.001853
4	A4	128	92.7737	0.0349643	0.00191242
4	A4	129	93.0306	0.0347984	0.00194808
4	A4	130	93.2875	0.0347155	0.00194005
4	A4	131	93.5444	0.0345727	0.00187964
4	A4	132	93.8013	0.0338448	0.00176227
4	A4	133	94.0581	0.0339207	0.00158388
4	A4	134	94.315	0.0337696	0.00134522
4	A4	135	94.5719	0.0332432	0.00105982
4	A4	136	94.8288	0.0333982	0.000756869
5	A5	1	60.1504	1.78751	0.07984
5	A5	2	60.4073	1.77643	0.0804527
5	A5	3	60.6642	1.76452	0.0809835
5	A5	4	60.921	1.75634	0.0814013
5	A5	5	61.1779	1.74815	0.0817776
5	A5	6	61.4348	1.73562	0.0821955
5	A5	7	61.6917	1.72865	0.0826456
5	A5	8	61.9485	1.71915	0.0829878
5	A5	9	62.2054	1.70587	0.0830115
5	A5	10	62.4623	1.69374	0.0825657
5	A5	11	62.7192	1.68675	0.0816554
5	A5	12	62.976	1.67217	0.0804637
5	A5	13	63.2329	1.66642	0.0792842
5	A5	14	63.4898	1.65386	0.0784086
5	A5	15	63.7467	1.64776	0.0780227
5	A5	16	64.0035	1.63673	0.0781502
5	A5	17	64.2604	1.63015	0.0786592
5	A5	18	64.5173	1.61533	0.0793122
5	A5	19	64.7742	1.60843	0.0798502
5	A5	20	65.0311	1.59987	0.0800716
5	A5	21	65.2879	1.5863	0.0798938
5	A5	22	65.5448	1.57564	0.0793782
5	A5	23	65.8017	1.5658	0.0786866
5	A5	24	66.0586	1.56024	0.0780006
5	A5	25	66.3154	1.54935	0.0774318
5	A5	26	66.5723	1.53663	0.0769888
5	A5	27	66.8292	1.53218	0.0766041
5	A5	28	67.0861	1.51957	0.0762022
5	A5	29	67.3429	1.50952	0.075744
5	A5	30	67.5998	1.50072	0.0752388
5	A5	31	67.8567	1.49282	0.0747013
5	A5	32	68.1136	1.48355	0.0741185
5	A5	33	68.3705	1.47272	0.0734302
5	A5	34	68.6273	1.46539	0.0725534
5	A5	35	68.8842	1.45409	0.0714123
5	A5	36	69.1411	1.44699	0.069971
5	A5	37	69.398	1.43695	0.0682478
5	A5	38	69.6548	1.4301	0.0663127
5	A5	39	69.9117	1.42017	0.0642856
5	A5	40	70.1686	1.41222	0.0623025
5	A5	41	70.4255	1.40641	0.0604799
5	A5	42	70.6823	1.3983	0.0588779
5	A5	43	70.9392	1.39359	0.0575074
5	A5	44	71.1961	1.38532	0.056397
5	A5	45	71.453	1.3756	0.0556617
5	A5	46	71.7099	1.36965	0.0555128
5	A5	47	71.9667	1.36501	0.0561861
5	A5	48	72.2236	1.36284	0.0578097
5	A5	49	72.4805	1.35086	0.0603123
5	A5	50	72.7374	1.34464	0.0634178
5	A5	51	72.9942	1.33673	0.0667126
5	A5	52	73.2511	1.32819	0.069753
5	A5	53	73.508	1.31979	0.0721715
5	A5	54	73.7649	1.30711	0.0737698
5	A5	55	74.0217	1.29818	0.0745677
5	A5	56	74.2786	1.2861	0.0747798
5	A5	57	74.5355	1.28154	0.0747162
5	A5	58	74.7924	1.27062	0.0746514
5	A5	59	75.0492	1.26277	0.0747403
5	A5	60	75.3061	1.25239	0.0750117
5	A5	61	75.563	1.24171	0.0754217
5	A5	62	75.8199	1.23418	0.075906
5	A5	63	76.0768	1.2231	0.0763932
5	A5	64	76.3336	1.2167	0.0768038
5	A5	65	76.5905	1.20578	0.0770682
5	A5	66	76.8474	1.19263	0.0771679
5	A5	67	77.1043	1.18398	0.0771618
5	A5	68	77.3611	1.17612	0.0771571
5	A5	69	77.618	1.16831	0.0772345
5	A5	70	77.8749	1.15765	0.0773863
5	A5	71	78.1318	1.14688	0.0775259
5	A5	72	78.3886	1.13686	0.0775628
5	A5	73	78.6455	1.1291	0.0774797
5	A5	74	78.9024	1.11625	0.077364
5	A5	75	79.1593	1.10883	0.0773652
5	A5	76	79.4162	1.10104	0.0776201
5	A5	77	79.673	1.08964	0.0782049
5	A5	78	79.9299	1.08215	0.0791525
5	A5	79	80.1868	1.06897	0.0805214
5	A5	80	80.4437	1.06025	0.0824728
5	A5	81	80.7005	1.05163	0.0852903
5	A5	82	80.9574	1.03885	0.0893143
5	A5	83	81.2143	1.03157	0.0948066
5	A5	84	81.4712	1.02016	0.101796
5	A5	85	81.728	1.00644	0.10999
5	A5	86	81.9849	0.993366	0.118826
5	A5	87	82.2418	0.977355	0.127755
5	A5	88	82.4987	0.959283	0.13678
5	A5	89	82.7556	0.939461	0.147158
5	A5	90	83.0124	0.914379	0.161998
5	A5	91	83.2693	0.897716	0.186324
5	A5	92	83.5262	0.889909	0.226176
5	A5	93	83.7831	0.870968	0.28656
5	A5	94	84.0399	0.855218	0.368597
5	A5	95	84.2968	0.822538	0.466867
5	A5	96	84.5537	0.776398	0.568431
5	A5	97	84.8106	0.674854	0.654758
5	A5	98	85.0674	0.514044	0.706662
5	A5	99	85.3243	0.347727	0.710629
5	A5	100	85.5812	0.211882	0.663779
5	A5	101	85.8381	0.129957	0.575005
5	A5	102	86.0949	0.0950288	0.461718
5	A5	103	86.3518	0.0831992	0.343826
5	A5	104	86.6087	0.0786679	0.237821
5	A5	105	86.8656	0.076212	0.153304
5	A5	106	87.1225	0.0745653	0.0926742
5	A5	107	87.3793	0.0734188	0.0531425
5	A5	108	87.6362	0.0727709	0.0295022
5	A5	109	87.8931	0.0717851	0.0164029
5	A5	110	88.15	0.0719344	0.00958603
5	A5	111	88.4068	0.0717148	0.00619037
5	A5	112	88.6637	0.0708107	0.00452589
5	A5	113	88.9206	0.0705176	0.00369016
5	A5	114	89.1775	0.0702014	0.00323918
5	A5	115	89.4343	0.0696649	0.00297149
5	A5	116	89.6912	0.0701086	0.00280501
5	A5	117	89.9481	0.0686422	0.00270886
5	A5	118	90.205	0.0694655	0.00266574
5	A5	119	90.4619	0.0685392	0.0026542
5	A5	120	90.7187	0.0684475	0.00264721
5	A5	121	90.9756	0.0679204	0.00262304
5	A5	122	91.2325	0.06726	0.00257901
5	A5	123	91.4894	0.0672143	0.00253593
5	A5	124	91.7462	0.0672008	0.00252539
5	A5	125	92.0031	0.0670168	0.00256513
5	A5	126	92.26	0.0667415	0.00264034
5	A5	127	92.5169	0.0661767	0.00270725
5	A5	128	92.7737	0.0648059	0.00271896
5	A5	129	93.0306	0.0653678	0.00265453
5	A5	130	93.2875	0.0648867	0.00252813
5	A5	131	93.5444	0.0649202	0.00237146
5	A5	132	93.8013	0.0645091	0.0022038
5	A5	133	94.0581	0.0643108	0.00201476
5	A5	134	94.315	0.0637554	0.00177341
5	A5	135	94.5719	0.0635971	0.00145702
5	A5	136	94.8288	0.0627998	0.00107669
6	A6	1	60.1504	1.71349	0.0748232
6	A6	2	60.4073	1.70434	0.0758705
6	A6	3	60.6642	1.69457	0.076687
6	A6	4	60.921	1.68639	0.0770018
6	A6	5	61.1779	1.669	0.0767904
6	A6	6	61.4348	1.65849	0.0762978
6	A6	7	61.6917	1.65427	0.0758873
6	A6	8	61.9485	1.64555	0.0758159
6	A6	9	62.2054	1.6344	0.0760853
6	A6	10	62.4623	1.62259	0.0764562
6	A6	11	62.7192	1.61401	0.0766002
6	A6	12	62.976	1.60103	0.0762779
6	A6	13	63.2329	1.58983	0.0754545
6	A6	14	63.4898	1.58136	0.0743012
6	A6	15	63.7467	1.57015	0.0731146
6	A6	16	64.0035	1.56323	0.0722047
6	A6	17	64.2604	1.55123	0.0717851
6	A6	18	64.5173	1.54324	0.0719054
6	A6	19	64.7742	1.53741	0.0724469
6	A6	20	65.0311	1.5252	0.0731806
6	A6	21	65.2879	1.5134	0.0738558
6	A6	22	65.5448	1.50284	0.0742711
6	A6	23	65.8017	1.49452	0.0742926
6	A6	24	66.0586	1.4858	0.0738429
6	A6	25	66.3154	1.47562	0.0729006
6	A6	26	66.5723	1.46152	0.0715292
6	A6	27	66.8292	1.45116	0.0699062
6	A6	28	67.0861	1.44816	0.0682982
6	A6	29	67.3429	1.43615	0.0669777
6	A6	30	67.5998	1.42769	0.0661254
6	A6	31	67.8567	1.41931	0.0657669
6	A6	32	68.1136	1.41352	0.065773
6	A6	33	68.3705	1.40245	0.0659141
6	A6	34	68.6273	1.39343	0.0659283
6	A6	35	68.8842	1.38297	0.0655901
6	A6	36	69.1411	1.37546	0.0647379
6	A6	37	69.398	1.36841	0.0632887
6	A6	38	69.6548	1.35587	0.0612429
6	A6	39	69.9117	1.34848	0.0587024
6	A6	40	70.1686	1.34053	0.0558734
6	A6	41	70.4255	1.33599	0.053049
6	A6	42	70.6823	1.32458	0.0505593
6	A6	43	70.9392	1.32203	0.0487018
6	A6	44	71.1961	1.31716	0.0476875
6	A6	45	71.453	1.31089	0.0476155
6	A6	46	71.7099	1.30318	0.04848
6	A6	47	71.9667	1.29868	0.0501899
6	A6	48	72.2236	1.29181	0.0525758
6	A6	49	72.4805	1.28594	0.055395
6	A6	50	72.7374	1.27731	0.058343
6	A6	51	72.9942	1.26977	0.0611
6	A6	52	73.2511	1.25816	0.063393
6	A6	53	73.508	1.25172	0.0650618
6	A6	54	73.7649	1.24111	0.0660903
6	A6	55	74.0217	1.23234	0.0665959
6	A6	56	74.2786	1.22016	0.0667835
6	A6	57	74.5355	1.21659	0.066881
6	A6	58	74.7924	1.20639	0.0670795
6	A6	59	75.0492	1.19426	0.0675004
6	A6	60	75.3061	1.18902	0.0681795
6	A6	61	75.563	1.17885	0.0690724
6	A6	62	75.8199	1.16866	0.0700567
6	A6	63	76.0768	1.16245	0.0709562
6	A6	64	76.3336	1.14719	0.071584
6	A6	65	76.5905	1.14103	0.0718113
6	A6	66	76.8474	1.13039	0.0716364
6	A6	67	77.1043	1.11828	0.0712052
6	A6	68	77.3611	1.10804	0.0707693
6	A6	69	77.618	1.104	0.0705733
6	A6	70	77.8749	1.09338	0.0707347
6	A6	71	78.1318	1.08456	0.0711849
6	A6	72	78.3886	1.07443	0.071722
6	A6	73	78.6455	1.06276	0.0721348
6	A6	74	78.9024	1.05428	0.0723257
6	A6	75	79.1593	1.04139	0.0723535
6	A6	76	79.4162	1.03684	0.0723867
6	A6	77	79.673	1.02404	0.0726125
6	A6	78	79.9299	1.01861	0.0731764
6	A6	79	80.1868	1.00413	0.0741844
6	A6	80	80.4437	0.995087	0.0757374
6	A6	81	80.7005	0.986684	0.0779521
6	A6	82	80.9574	0.978286	0.0809374
6	A6	83	81.2143	0.964108	0.0847379
6	A6	84	81.4712	0.954848	0.0892889
6	A6	85	81.728	0.942536	0.0944261
6	A6	86	81.9849	0.930456	0.0999958
6	A6	87	82.2418	0.914634	0.106108
6	A6	88	82.4987	0.900073	0.113539
6	A6	89	82.7556	0.882752	0.124196
6	A6	90	83.0124	0.86641	0.141456
6	A6	91	83.2693	0.852982	0.170026
6	A6	92	83.5262	0.839428	0.215033
6	A6	93	83.7831	0.823229	0.280164
6	A6	94	84.0399	0.802285	0.365195
6	A6	95	84.2968	0.770931	0.463808
6	A6	96	84.5537	0.707312	0.563024
6	A6	97	84.8106	0.594818	0.645268
6	A6	98	85.0674	0.42876	0.693005
6	A6	99	85.3243	0.263657	0.694402
6	A6	100	85.5812	0.125971	0.647554
6	A6	101	85.8381	0.0370173	0.561247
6	A6	102	86.0949	-0.00434902	0.45188
6	A6	103	86.3518	-0.0192529	0.338045
6	A6	104	86.6087	-0.0243564	0.235213
6	A6	105	86.8656	-0.0267453	0.15257
6	A6	106	87.1225	-0.0283635	0.0926522
6	A6	107	87.3793	-0.0298977	0.0530761
6	A6	108	87.6362	-0.030276	0.029054
6	A6	109	87.8931	-0.030477	0.0155213
6	A6	110	88.15	-0.0304562	0.00835471
6	A6	111	88.4068	-0.031059	0.00472802
6	A6	112	88.6637	-0.0314195	0.00294231
6	A6	113	88.9206	-0.0310388	0.00207497
6	A6	114	89.1775	-0.0312398	0.00165798
6	A6	115	89.4343	-0.0315464	0.00146044
6	A6	116	89.6912	-0.0321548	0.00136886
6	A6	117	89.9481	-0.0320163	0.00132953
6	A6	118	90.205	-0.031807	0.00131932
6	A6	119	90.4619	-0.0323922	0.0013268
6	A6	120	90.7187	-0.0322182	0.00134058
6	A6	121	90.9756	-0.0329835	0.00134686
6	A6	122	91.2325	-0.0328898	0.00133429
6	A6	123	91.4894	-0.0329299	0.00129915
6	A6	124	91.7462	-0.0333387	0.00124541
6	A6	125	92.0031	-0.0332196	0.00118037
6	A6	126	92.26	-0.0335924	0.00111053
6	A6	127	92.5169	-0.0336719	0.00104075
6	A6	128	92.7737	-0.0339197	0.000975266
6	A6	129	93.0306	-0.033601	0.000917577
6	A6	130	93.2875	-0.0342662	0.000867932
6	A6	131	93.5444	-0.033967	0.000820654
6	A6	132	93.8013	-0.034023	0.000764471
6	A6	133	94.0581	-0.0347415	0.000687122
6	A6	134	94.315	-0.0341888	0.000582178
6	A6	135	94.5719	-0.0346539	0.000453938
6	A6	136	94.8288	-0.0345447	0.000317085
7	A7	1	60.1504	1.75208	0.0756663
7	A7	2	60.4073	1.74049	0.0776028
7	A7	3	60.6642	1.73321	0.0793856
7	A7	4	60.921	1.72105	0.0804737
7	A7	5	61.1779	1.70343	0.0805751
7	A7	6	61.4348	1.6973	0.0797712
7	A7	7	61.6917	1.68196	0.0784455
7	A7	8	61.9485	1.67963	0.0770677
7	A7	9	62.2054	1.66553	0.0759665
7	A7	10	62.4623	1.65643	0.0752144
7	A7	11	62.7192	1.64847	0.0746628
7	A7	12	62.976	1.63818	0.0740924
7	A7	13	63.2329	1.62508	0.0733755
7	A7	14	63.4898	1.6151	0.0725705
7	A7	15	63.7467	1.60553	0.0718802
7	A7	16	64.0035	1.60118	0.0715302
7	A7	17	64.2604	1.58845	0.0716293
7	A7	18	64.5173	1.58065	0.0721061
7	A7	19	64.7742	1.57232	0.0727461
7	A7	20	65.0311	1.55858	0.0732969
7	A7	21	65.2879	1.55071	0.0735752
7	A7	22	65.5448	1.54145	0.0735229
7	A7	23	65.8017	1.52853	0.0732016
7	A7	24	66.0586	1.52158	0.0727349
7	A7	25	66.3154	1.51094	0.0722244
7	A7	26	66.5723	1.5013	0.0716854
7	A7	27	66.8292	1.49542	0.0710401
7	A7	28	67.0861	1.48231	0.0701726
7	A7	29	67.3429	1.47309	0.0690234
7	A7	30	67.5998	1.46133	0.0676503
7	A7	31	67.8567	1.45635	0.0662197
7	A7	32	68.1136	1.4461	0.0649292
7	A7	33	68.3705	1.44048	0.0639251
7	A7	34	68.6273	1.43061	0.0632459
7	A7	35	68.8842	1.41821	0.0628019
7	A7	36	69.1411	1.41706	0.0623877
7	A7	37	69.398	1.40827	0.0617203
7	A7	38	69.6548	1.39409	0.0605223
7	A7	39	69.9117	1.3905	0.0586335
7	A7	40	70.1686	1.37671	0.0560987
7	A7	41	70.4255	1.37154	0.0531868
7	A7	42	70.6823	1.36823	0.0503213
7	A7	43	70.9392	1.35962	0.047967
7	A7	44	71.1961	1.35138	0.0465235
7	A7	45	71.453	1.35291	0.0462505
7	A7	46	71.7099	1.34353	0.0472322
7	A7	47	71.9667	1.33879	0.0493756
7	A7	48	72.2236	1.33281	0.0524256
7	A7	49	72.4805	1.32563	0.0560025
7	A7	50	72.7374	1.31716	0.0596585
7	A7	51	72.9942	1.31073	0.0629534
7	A7	52	73.2511	1.29936	0.0655528
7	A7	53	73.508	1.28869	0.067304
7	A7	54	73.7649	1.27795	0.0682572
7	A7	55	74.0217	1.27036	0.0686044
7	A7	56	74.2786	1.26539	0.0685888
7	A7	57	74.5355	1.25082	0.0684301
7	A7	58	74.7924	1.24308	0.0683019
7	A7	59	75.0492	1.23309	0.0683256
7	A7	60	75.3061	1.22679	0.0685567
7	A7	61	75.563	1.21701	0.068956
7	A7	62	75.8199	1.20927	0.0694016
7	A7	63	76.0768	1.19863	0.0697548
7	A7	64	76.3336	1.18526	0.0699555
7	A7	65	76.5905	1.17715	0.0700592
7	A7	66	76.8474	1.17191	0.0701853
7	A7	67	77.1043	1.16174	0.0704165
7	A7	68	77.3611	1.15032	0.0707389
7	A7	69	77.618	1.14416	0.0710684
7	A7	70	77.8749	1.12988	0.0713385
7	A7	71	78.1318	1.12108	0.0715656
7	A7	72	78.3886	1.11456	0.0718392
7	A7	73	78.6455	1.10507	0.0722541
7	A7	74	78.9024	1.0938	0.0728415
7	A7	75	79.1593	1.08546	0.0735571
7	A7	76	79.4162	1.0754	0.0743234
7	A7	77	79.673	1.06365	0.0750914
7	A7	78	79.9299	1.05433	0.0758781
7	A7	79	80.1868	1.04634	0.076773
7	A7	80	80.4437	1.03306	0.077923
7	A7	81	80.7005	1.0254	0.0795117
7	A7	82	80.9574	1.01331	0.0817292
7	A7	83	81.2143	1.00226	0.0847225
7	A7	84	81.4712	0.99419	0.0885329
7	A7	85	81.728	0.981748	0.0930725
7	A7	86	81.9849	0.969157	0.0982131
7	A7	87	82.2418	0.953096	0.10405
7	A7	88	82.4987	0.941831	0.111336
7	A7	89	82.7556	0.921245	0.121978
7	A7	90	83.0124	0.909362	0.139382
7	A7	91	83.2693	0.893532	0.168305
7	A7	92	83.5262	0.878901	0.213893
7	A7	93	83.7831	0.868762	0.279783
7	A7	94	84.0399	0.844727	0.365601
7	A7	95	84.2968	0.81362	0.464828
7	A7	96	84.5537	0.749782	0.564323
7	A7	97	84.8106	0.634531	0.646481
7	A7	98	85.0674	0.471141	0.693899
7	A7	99	85.3243	0.309255	0.694958
7	A7	100	85.5812	0.173613	0.647936
7	A7	101	85.8381	0.0838101	0.561682
7	A7	102	86.0949	0.0422452	0.452538
7	A7	103	86.3518	0.0274102	0.338979
7	A7	104	86.6087	0.0223104	0.236381
7	A7	105	86.8656	0.0199519	0.153883
7	A7	106	87.1225	0.0175477	0.0940191
7	A7	107	87.3793	0.0162956	0.0544261
7	A7	108	87.6362	0.0152976	0.0303368
7	A7	109	87.8931	0.0152845	0.0167033
7	A7	110	88.15	0.0148638	0.0094181
7	A7	111	88.4068	0.014367	0.00567111
7	A7	112	88.6637	0.014103	0.00377886
7	A7	113	88.9206	0.0139296	0.00282907
7	A7	114	89.1775	0.014059	0.00235501
7	A7	115	89.4343	0.0135672	0.00211686
7	A7	116	89.6912	0.0131052	0.00198536
7	A7	117	89.9481	0.0125804	0.00189173
7	A7	118	90.205	0.0128108	0.00180645
7	A7	119	90.4619	0.0125705	0.00172381
7	A7	120	90.7187	0.0125873	0.00164693
7	A7	121	90.9756	0.0118686	0.00157849
7	A7	122	91.2325	0.0115779	0.0015201
7	A7	123	91.4894	0.0119481	0.00147513
7	A7	124	91.7462	0.0114329	0.00144769
7	A7	125	92.0031	0.0117681	0.0014372
7	A7	126	92.26	0.0108168	0.00143506
7	A7	127	92.5169	0.0110285	0.00142817
7	A7	128	92.7737	0.0106464	0.00140657
7	A7	129	93.0306	0.0104313	0.00136763
7	A7	130	93.2875	0.0104073	0.0013128
7	A7	131	93.5444	0.0106819	0.00124093
7	A7	132	93.8013	0.00961038	0.0011457
7	A7	133	94.0581	0.00965805	0.00102005
7	A7	134	94.315	0.0100342	0.000863604
7	A7	135	94.5719	0.00972147	0.000686354
7	A7	136	94.8288	0.00944258	0.000505995
8	A8	1	60.1504	1.69925	0.0735047
8	A8	2	60.4073	1.68957	0.0740902
8	A8	3	60.6642	1.68132	0.0747662
8	A8	4	60.921	1.6758	0.0753736
8	A8	5	61.1779	1.66188	0.0757846
8	A8	6	61.4348	1.65042	0.0759577
8	A8	7	61.6917	1.6389	0.0759373
8	A8	8	61.9485	1.63395	0.0758059
8	A8	9	62.2054	1.62309	0.0756209
8	A8	10	62.4623	1.61024	0.0753884
8	A8	11	62.7192	1.60024	0.075083
8	A8	12	62.976	1.59085	0.0746825
8	A8	13	63.2329	1.58323	0.0741817
8	A8	14	63.4898	1.56835	0.0735786
8	A8	15	63.7467	1.56226	0.0728652
8	A8	16	64.0035	1.5525	0.0720354
8	A8	17	64.2604	1.54188	0.0711172
8	A8	18	64.5173	1.5301	0.0702053
8	A8	19	64.7742	1.52361	0.0694486
8	A8	20	65.0311	1.51356	0.0689951
8	A8	21	65.2879	1.50579	0.0689057
8	A8	22	65.5448	1.49697	0.0690888
8	A8	23	65.8017	1.48756	0.0693166
8	A8	24	66.0586	1.47886	0.0693073
8	A8	25	66.3154	1.46749	0.0688587
8	A8	26	66.5723	1.45657	0.067953
8	A8	27	66.8292	1.44803	0.0667672
8	A8	28	67.0861	1.44004	0.0655929
8	A8	29	67.3429	1.43257	0.0646972
8	A8	30	67.5998	1.42545	0.0642044
8	A8	31	67.8567	1.41482	0.0640541
8	A8	32	68.1136	1.40804	0.0640367
8	A8	33	68.3705	1.39689	0.0638777
8	A8	34	68.6273	1.39367	0.0633452
8	A8	35	68.8842	1.37606	0.0623376
8	A8	36	69.1411	1.37409	0.0609157
8	A8	37	69.398	1.36102	0.0592567
8	A8	38	69.6548	1.35562	0.0575442
8	A8	39	69.9117	1.35167	0.0558539
8	A8	40	70.1686	1.34274	0.0541276
8	A8	41	70.4255	1.33435	0.0522572
8	A8	42	70.6823	1.32416	0.050228
8	A8	43	70.9392	1.32007	0.048221
8	A8	44	71.1961	1.31439	0.0465938
8	A8	45	71.453	1.30763	0.0457632
8	A8	46	71.7099	1.30608	0.0460538
8	A8	47	71.9667	1.29912	0.0475849
8	A8	48	72.2236	1.29133	0.050226
8	A8	49	72.4805	1.28646	0.0536153
8	A8	50	72.7374	1.28242	0.0572409
8	A8	51	72.9942	1.27202	0.0605766
8	A8	52	73.2511	1.25642	0.0632366
8	A8	53	73.508	1.25234	0.0650851
8	A8	54	73.7649	1.242	0.0662388
8	A8	55	74.0217	1.23296	0.0669534
8	A8	56	74.2786	1.22489	0.067471
8	A8	57	74.5355	1.21522	0.067908
8	A8	58	74.7924	1.2089	0.0682485
8	A8	59	75.0492	1.19578	0.0684297
8	A8	60	75.3061	1.18668	0.068445
8	A8	61	75.563	1.17648	0.0683912
8	A8	62	75.8199	1.16829	0.0684238
8	A8	63	76.0768	1.1639	0.0686605
8	A8	64	76.3336	1.15157	0.069111
8	A8	65	76.5905	1.13942	0.0696792
8	A8	66	76.8474	1.13368	0.0702252
8	A8	67	77.1043	1.12157	0.0706388
8	A8	68	77.3611	1.11513	0.0708823
8	A8	69	77.618	1.10164	0.0709966
8	A8	70	77.8749	1.09301	0.0710719
8	A8	71	78.1318	1.08534	0.0712047
8	A8	72	78.3886	1.07655	0.0714507
8	A8	73	78.6455	1.06526	0.0717999
8	A8	74	78.9024	1.05626	0.0721911
8	A8	75	79.1593	1.04579	0.0725608
8	A8	76	79.4162	1.0383	0.0728979
8	A8	77	79.673	1.02502	0.0732677
8	A8	78	79.9299	1.01463	0.0737886
8	A8	79	80.1868	1.00948	0.0745852
8	A8	80	80.4437	0.999421	0.0757581
8	A8	81	80.7005	0.987193	0.0774089
8	A8	82	80.9574	0.975921	0.0796876
8	A8	83	81.2143	0.962726	0.0827837
8	A8	84	81.4712	0.957027	0.0868213
8	A8	85	81.728	0.950324	0.0917298
8	A8	86	81.9849	0.932618	0.0972592
8	A8	87	82.2418	0.91865	0.103278
8	A8	88	82.4987	0.901401	0.11033
8	A8	89	82.7556	0.883838	0.120248
8	A8	90	83.0124	0.871053	0.136512
8	A8	91	83.2693	0.859271	0.164027
8	A8	92	83.5262	0.843067	0.208067
8	A8	93	83.7831	0.831783	0.272336
8	A8	94	84.0399	0.811154	0.35652
8	A8	95	84.2968	0.780523	0.454217
8	A8	96	84.5537	0.716216	0.552495
8	A8	97	84.8106	0.60413	0.634021
8	A8	98	85.0674	0.441377	0.681631
8	A8	99	85.3243	0.281476	0.683802
8	A8	100	85.5812	0.146518	0.638689
8	A8	101	85.8381	0.057712	0.554815
8	A8	102	86.0949	0.0144596	0.448094
8	A8	103	86.3518	-0.00145601	0.336608
8	A8	104	86.6087	-0.00677763	0.235501
8	A8	105	86.8656	-0.00978263	0.153877
8	A8	106	87.1225	-0.0115059	0.0943855
8	A8	107	87.3793	-0.0128724	0.0548436
8	A8	108	87.6362	-0.0140168	0.0306499
8	A8	109	87.8931	-0.0143159	0.0168723
8	A8	110	88.15	-0.0148278	0.00946971
8	A8	111	88.4068	-0.0145069	0.00566325
8	A8	112	88.6637	-0.0149293	0.00377395
8	A8	113	88.9206	-0.0151386	0.00287258
8	A8	114	89.1775	-0.0156995	0.00246282
8	A8	115	89.4343	-0.0156992	0.00227625
8	A8	116	89.6912	-0.0163867	0.00216632
8	A8	117	89.9481	-0.016637	0.00205923
8	A8	118	90.205	-0.0165844	0.00192769
8	A8	119	90.4619	-0.016954	0.00177241
8	A8	120	90.7187	-0.0174969	0.00160755
8	A8	121	90.9756	-0.0173071	0.00145037
8	A8	122	91.2325	-0.017228	0.0013151
8	A8	123	91.4894	-0.0177896	0.00121098
8	A8	124	91.7462	-0.0178008	0.00114414
8	A8	125	92.0031	-0.0178464	0.00112063
8	A8	126	92.26	-0.0183531	0.00114615
8	A8	127	92.5169	-0.0176531	0.00122064
8	A8	128	92.7737	-0.0183487	0.00133109
8	A8	129	93.0306	-0.0186906	0.00144963
8	A8	130	93.2875	-0.0190071	0.00153993
8	A8	131	93.5444	-0.0188476	0.00156861
8	A8	132	93.8013	-0.0195787	0.00151506
8	A8	133	94.0581	-0.0196621	0.00137583
8	A8	134	94.315	-0.0195769	0.00116432
8	A8	135	94.5719	-0.0201287	0.000907618
8	A8	136	94.8288	-0.0199141	0.000640994
9	A9	1	60.1504	1.70892	0.0734258
9	A9	2	60.4073	1.69615	0.0741469
9	A9	3	60.6642	1.69119	0.0749454
9	A9	4	60.921	1.68308	0.0756789
9	A9	5	61.1779	1.6655	0.0762426
9	A9	6	61.4348	1.6597	0.0765763
9	A9	7	61.6917	1.65147	0.0766425
9	A9	8	61.9485	1.6405	0.0764147
9	A9	9	62.2054	1.62676	0.07589
9	A9	10	62.4623	1.61307	0.0751165
9	A9	11	62.7192	1.61339	0.0742033
9	A9	12	62.976	1.59861	0.0733126
9	A9	13	63.2329	1.58466	0.0726295
9	A9	14	63.4898	1.57834	0.0723166
9	A9	15	63.7467	1.57122	0.0724536
9	A9	16	64.0035	1.56142	0.0729972
9	A9	17	64.2604	1.55267	0.0737876
9	A9	18	64.5173	1.53857	0.0746054
9	A9	19	64.7742	1.52851	0.0752391
9	A9	20	65.0311	1.5214	0.0755265
9	A9	21	65.2879	1.51149	0.0753589
9	A9	22	65.5448	1.49892	0.0746881
9	A9	23	65.8017	1.48462	0.0735414
9	A9	24	66.0586	1.48034	0.0720334
9	A9	25	66.3154	1.47207	0.0703519
9	A9	26	66.5723	1.45571	0.0687177
9	A9	27	66.8292	1.45208	0.0673225
9	A9	28	67.0861	1.44254	0.0662727
9	A9	29	67.3429	1.43604	0.0655605
9	A9	30	67.5998	1.42423	0.0650791
9	A9	31	67.8567	1.41851	0.064682
9	A9	32	68.1136	1.4062	0.0642612
9	A9	33	68.3705	1.39932	0.0637794
9	A9	34	68.6273	1.38947	0.0632454
9	A9	35	68.8842	1.38428	0.0626498
9	A9	36	69.1411	1.37318	0.061912
9	A9	37	69.398	1.36757	0.0608797
9	A9	38	69.6548	1.35639	0.0593934
9	A9	39	69.9117	1.3466	0.0573593
9	A9	40	70.1686	1.34187	0.0548123
9	A9	41	70.4255	1.33382	0.0519384
9	A9	42	70.6823	1.32601	0.0490655
9	A9	43	70.9392	1.31964	0.0466234
9	A9	44	71.1961	1.31343	0.0450623
9	A9	45	71.453	1.312	0.0447394
9	A9	46	71.7099	1.30714	0.0458052
9	A9	47	71.9667	1.2998	0.0481443
9	A9	48	72.2236	1.2947	0.0513929
9	A9	49	72.4805	1.28753	0.0550331
9	A9	50	72.7374	1.27951	0.058525
9	A9	51	72.9942	1.26958	0.0614463
9	A9	52	73.2511	1.26091	0.0635925
9	A9	53	73.508	1.24966	0.0650129
9	A9	54	73.7649	1.24085	0.0659502
9	A9	55	74.0217	1.23442	0.0667078
9	A9	56	74.2786	1.22643	0.0675149
9	A9	57	74.5355	1.21544	0.0684449
9	A9	58	74.7924	1.20695	0.0694247
9	A9	59	75.0492	1.19741	0.0703048
9	A9	60	75.3061	1.18509	0.070939
9	A9	61	75.563	1.17958	0.0712352
9	A9	62	75.8199	1.16642	0.0711788
9	A9	63	76.0768	1.15828	0.0708299
9	A9	64	76.3336	1.14586	0.0703065
9	A9	65	76.5905	1.13908	0.0697467
9	A9	66	76.8474	1.1307	0.0692667
9	A9	67	77.1043	1.12067	0.068936
9	A9	68	77.3611	1.11173	0.0687824
9	A9	69	77.618	1.0986	0.0688044
9	A9	70	77.8749	1.09546	0.0689805
9	A9	71	78.1318	1.08506	0.0692637
9	A9	72	78.3886	1.07368	0.0695868
9	A9	73	78.6455	1.06675	0.0698985
9	A9	74	78.9024	1.05178	0.0702019
9	A9	75	79.1593	1.04797	0.0705616
9	A9	76	79.4162	1.03731	0.0710723
9	A9	77	79.673	1.02748	0.0718128
9	A9	78	79.9299	1.01844	0.072834
9	A9	79	80.1868	1.00787	0.0741902
9	A9	80	80.4437	0.997658	0.0759821
9	A9	81	80.7005	0.987935	0.078364
9	A9	82	80.9574	0.97723	0.0814861
9	A9	83	81.2143	0.968296	0.0853993
9	A9	84	81.4712	0.957254	0.0899793
9	A9	85	81.728	0.944465	0.0949456
9	A9	86	81.9849	0.928382	0.100021
9	A9	87	82.2418	0.915744	0.105246
9	A9	88	82.4987	0.902435	0.111416
9	A9	89	82.7556	0.880186	0.120543
9	A9	90	83.0124	0.869038	0.136147
9	A9	91	83.2693	0.854821	0.163083
9	A9	92	83.5262	0.84362	0.206616
9	A9	93	83.7831	0.828894	0.270598
9	A9	94	84.0399	0.805911	0.355039
9	A9	95	84.2968	0.780083	0.453937
9	A9	96	84.5537	0.716891	0.554632
9	A9	97	84.8106	0.60639	0.639715
9	A9	98	85.0674	0.443867	0.691504
9	A9	99	85.3243	0.277461	0.697627
9	A9	100	85.5812	0.137734	0.655345
9	A9	101	85.8381	0.0432868	0.572576
9	A9	102	86.0949	-0.00414705	0.465111
9	A9	103	86.3518	-0.021684	0.351396
9	A9	104	86.6087	-0.0276875	0.247226
9	A9	105	86.8656	-0.0309513	0.162392
9	A9	106	87.1225	-0.0330102	0.100067
9	A9	107	87.3793	-0.0342201	0.0583415
9	A9	108	87.6362	-0.0351295	0.0326578
9	A9	109	87.8931	-0.0356817	0.0179773
9	A9	110	88.15	-0.0359062	0.0100884
9	A9	111	88.4068	-0.0361075	0.00604376
9	A9	112	88.6637	-0.0363221	0.00403462
9	A9	113	88.9206	-0.0366795	0.00305358
9	A9	114	89.1775	-0.0370815	0.00257302
9	A9	115	89.4343	-0.0375612	0.00232516
9	A9	116	89.6912	-0.0374229	0.00217732
9	A9	117	89.9481	-0.038162	0.00206653
9	A9	118	90.205	-0.037922	0.00196501
9	A9	119	90.4619	-0.0381616	0.00186323
9	A9	120	90.7187	-0.0394018	0.00176371
9	A9	121	90.9756	-0.038654	0.00167812
9	A9	122	91.2325	-0.0387045	0.00162115
9	A9	123	91.4894	-0.0393046	0.00160111
9	A9	124	91.7462	-0.0394872	0.00161363
9	A9	125	92.0031	-0.0393629	0.00164421
9	A9	126	92.26	-0.0402863	0.00167723
9	A9	127	92.5169	-0.0401572	0.00170286
9	A9	128	92.7737	-0.0402388	0.00171559
9	A9	129	93.0306	-0.040446	0.00170682
9	A9	130	93.2875	-0.0408271	0.00166059
9	A9	131	93.5444	-0.0416298	0.00155852
9	A9	132	93.8013	-0.0413466	0.00139086
9	A9	133	94.0581	-0.0413251	0.00116485
9	A9	134	94.315	-0.0416785	0.000904085
9	A9	135	94.5719	-0.0418679	0.000640521
9	A9	136	94.8288	-0.0415475	0.000404544
10	A10	1	60.1504	1.61044	0.0773193
10	A10	2	60.4073	1.59845	0.0779112
10	A10	3	60.6642	1.59231	0.0784644
10	A10	4	60.921	1.58204	0.0788091
10	A10	5	61.1779	1.57117	0.0788426
10	A10	6	61.4348	1.55769	0.0785745
10	A10	7	61.6917	1.54849	0.0781251
10	A10	8	61.9485	1.54027	0.0776746
10	A10	9	62.2054	1.52718	0.0773956
10	A10	10	62.4623	1.52257	0.0774006
10	A10	11	62.7192	1.50412	0.0777076
10	A10	12	62.976	1.50115	0.0782227
10	A10	13	63.2329	1.48692	0.0787364
10	A10	14	63.4898	1.47973	0.078971
10	A10	15	63.7467	1.46724	0.0786859
10	A10	16	64.0035	1.45429	0.0778099
10	A10	17	64.2604	1.44103	0.0765153
10	A10	18	64.5173	1.43278	0.0751513
10	A10	19	64.7742	1.42754	0.0740742
10	A10	20	65.0311	1.41663	0.0734584
10	A10	21	65.2879	1.4071	0.0732241
10	A10	22	65.5448	1.39637	0.0731059
10	A10	23	65.8017	1.38654	0.0728207
10	A10	24	66.0586	1.37693	0.0722164
10	A10	25	66.3154	1.36623	0.0713305
10	A10	26	66.5723	1.35255	0.0703298
10	A10	27	66.8292	1.35147	0.069394
10	A10	28	67.0861	1.34164	0.068612
10	A10	29	67.3429	1.32967	0.0679748
10	A10	30	67.5998	1.31973	0.0674372
10	A10	31	67.8567	1.3114	0.0669891
10	A10	32	68.1136	1.30435	0.0666671
10	A10	33	68.3705	1.29418	0.0664941
10	A10	34	68.6273	1.28718	0.0664207
10	A10	35	68.8842	1.27757	0.06631
10	A10	36	69.1411	1.26909	0.0659852
10	A10	37	69.398	1.25695	0.0652979
10	A10	38	69.6548	1.25004	0.0641653
10	A10	39	69.9117	1.24091	0.0625702
10	A10	40	70.1686	1.2353	0.0605551
10	A10	41	70.4255	1.2246	0.0582375
10	A10	42	70.6823	1.21289	0.0558378
10	A10	43	70.9392	1.21214	0.0536697
10	A10	44	71.1961	1.20071	0.0520722
10	A10	45	71.453	1.20132	0.0512989
10	A10	46	71.7099	1.18924	0.0514354
10	A10	47	71.9667	1.18688	0.0523909
10	A10	48	72.2236	1.17816	0.0539603
10	A10	49	72.4805	1.17027	0.0559107
10	A10	50	72.7374	1.16377	0.0580518
10	A10	51	72.9942	1.15361	0.0602541
10	A10	52	73.2511	1.14861	0.0624365
10	A10	53	73.508	1.13865	0.0645374
10	A10	54	73.7649	1.12883	0.0664973
10	A10	55	74.0217	1.11867	0.0682506
10	A10	56	74.2786	1.11364	0.0697244
10	A10	57	74.5355	1.10084	0.0708496
10	A10	58	74.7924	1.09016	0.071579
10	A10	59	75.0492	1.08048	0.0719135
10	A10	60	75.3061	1.07397	0.0719149
10	A10	61	75.563	1.05992	0.0717013
10	A10	62	75.8199	1.0513	0.0714069
10	A10	63	76.0768	1.04339	0.0711359
10	A10	64	76.3336	1.0345	0.0709273
10	A10	65	76.5905	1.02551	0.0707528
10	A10	66	76.8474	1.0112	0.0705574
10	A10	67	77.1043	1.00559	0.0703083
10	A10	68	77.3611	0.996824	0.0700287
10	A10	69	77.618	0.985839	0.0697876
10	A10	70	77.8749	0.97459	0.0696613
10	A10	71	78.1318	0.969664	0.0696853
10	A10	72	78.3886	0.961688	0.069842
10	A10	73	78.6455	0.948021	0.0700925
10	A10	74	78.9024	0.939506	0.0704325
10	A10	75	79.1593	0.929157	0.0709179
10	A10	76	79.4162	0.921628	0.0716353
10	A10	77	79.673	0.915036	0.0726393
10	A10	78	79.9299	0.902677	0.0739142
10	A10	79	80.1868	0.890907	0.0754099
10	A10	80	80.4437	0.882037	0.0771132
10	A10	81	80.7005	0.8725	0.079096
10	A10	82	80.9574	0.860195	0.081491
10	A10	83	81.2143	0.850388	0.0844021
10	A10	84	81.4712	0.84284	0.0878191
10	A10	85	81.728	0.825186	0.0916116
10	A10	86	81.9849	0.818289	0.0956655
10	A10	87	82.2418	0.80014	0.100172
10	A10	88	82.4987	0.785525	0.106029
10	A10	89	82.7556	0.772776	0.115263
10	A10	90	83.0124	0.759269	0.131286
10	A10	91	83.2693	0.74603	0.15877
10	A10	92	83.5262	0.732076	0.202809
10	A10	93	83.7831	0.718026	0.267237
10	A10	94	84.0399	0.699554	0.352281
10	A10	95	84.2968	0.669875	0.452353
10	A10	96	84.5537	0.607792	0.555239
10	A10	97	84.8106	0.504632	0.643754
10	A10	98	85.0674	0.34147	0.700004
10	A10	99	85.3243	0.176344	0.710912
10	A10	100	85.5812	0.0318501	0.672731
10	A10	101	85.8381	-0.0698943	0.592427
10	A10	102	86.0949	-0.122795	0.485276
10	A10	103	86.3518	-0.143744	0.36983
10	A10	104	86.6087	-0.150391	0.262514
10	A10	105	86.8656	-0.153644	0.173989
10	A10	106	87.1225	-0.155465	0.108201
10	A10	107	87.3793	-0.157336	0.0637096
10	A10	108	87.6362	-0.158626	0.036086
10	A10	109	87.8931	-0.158497	0.0201815
10	A10	110	88.15	-0.159041	0.011571
10	A10	111	88.4068	-0.160124	0.00710019
10	A10	112	88.6637	-0.160037	0.00481418
10	A10	113	88.9206	-0.160345	0.00362677
10	A10	114	89.1775	-0.160315	0.00297872
10	A10	115	89.4343	-0.161393	0.00259348
10	A10	116	89.6912	-0.161498	0.0023379
10	A10	117	89.9481	-0.161487	0.00215352
10	A10	118	90.205	-0.161747	0.00202143
10	A10	119	90.4619	-0.162157	0.00193985
10	A10	120	90.7187	-0.162244	0.00190952
10	A10	121	90.9756	-0.162022	0.00192806
10	A10	122	91.2325	-0.163466	0.00199105
10	A10	123	91.4894	-0.162999	0.00209195
10	A10	124	91.7462	-0.16289	0.00221602
10	A10	125	92.0031	-0.163571	0.00233259
10	A10	126	92.26	-0.163691	0.0023973
10	A10	127	92.5169	-0.165291	0.00237031
10	A10	128	92.7737	-0.164679	0.00224092
10	A10	129	93.0306	-0.165276	0.00203914
10	A10	130	93.2875	-0.165501	0.00182139
10	A10	131	93.5444	-0.164803	0.00163684
10	A10	132	93.8013	-0.16536	0.00149755
10	A10	133	94.0581	-0.165942	0.00137363
10	A10	134	94.315	-0.166119	0.0012174
10	A10	135	94.5719	-0.166731	0.000998918
10	A10	136	94.8288	-0.166269	0.000727817
11	A11	1	60.1504	1.76037	0.0747436
11	A11	2	60.4073	1.74996	0.0747616
11	A11	3	60.6642	1.73535	0.0745011
11	A11	4	60.921	1.72891	0.0741017
11	A11	5	61.1779	1.7188	0.073831
11	A11	6	61.4348	1.71506	0.0739345
11	A11	7	61.6917	1.69863	0.0744812
11	A11	8	61.9485	1.69371	0.0753119
11	A11	9	62.2054	1.68325	0.0761138
11	A11	10	62.4623	1.66911	0.0765716
11	A11	11	62.7192	1.65871	0.0765065
11	A11	12	62.976	1.65047	0.0759533
11	A11	13	63.2329	1.6368	0.0751409
11	A11	14	63.4898	1.62954	0.0743852
11	A11	15	63.7467	1.61531	0.0739385
11	A11	16	64.0035	1.61427	0.0738593
11	A11	17	64.2604	1.60157	0.0739786
11	A11	18	64.5173	1.59071	0.0739905
11	A11	19	64.7742	1.57738	0.0736281
11	A11	20	65.0311	1.5688	0.0728189
11	A11	21	65.2879	1.55873	0.0717184
11	A11	22	65.5448	1.54838	0.0706101
11	A11	23	65.8017	1.54119	0.0697409
11	A11	24	66.0586	1.53384	0.0691853
11	A11	25	66.3154	1.52352	0.0688221
11	A11	26	66.5723	1.51269	0.0684289
11	A11	27	66.8292	1.50542	0.0678314
11	A11	28	67.0861	1.49245	0.0670138
11	A11	29	67.3429	1.48443	0.0661295
11	A11	30	67.5998	1.47775	0.0653936
11	A11	31	67.8567	1.46824	0.0649249
11	A11	32	68.1136	1.46128	0.0646424
11	A11	33	68.3705	1.45457	0.0642936
11	A11	34	68.6273	1.44329	0.0636101
11	A11	35	68.8842	1.43043	0.0624898
11	A11	36	69.1411	1.42006	0.0610726
11	A11	37	69.398	1.42013	0.0596555
11	A11	38	69.6548	1.41077	0.0584975
11	A11	39	69.9117	1.40289	0.0576524
11	A11	40	70.1686	1.3915	0.0569284
11	A11	41	70.4255	1.39085	0.0560026
11	A11	42	70.6823	1.37922	0.0546249
11	A11	43	70.9392	1.36959	0.0528149
11	A11	44	71.1961	1.35797	0.0509345
11	A11	45	71.453	1.35911	0.0495842
11	A11	46	71.7099	1.35157	0.0493473
11	A11	47	71.9667	1.34886	0.0505195
11	A11	48	72.2236	1.34307	0.0529666
11	A11	49	72.4805	1.33412	0.0561858
11	A11	50	72.7374	1.32633	0.0595241
11	A11	51	72.9942	1.31588	0.062428
11	A11	52	73.2511	1.30712	0.0646046
11	A11	53	73.508	1.29488	0.0660413
11	A11	54	73.7649	1.28992	0.066909
11	A11	55	74.0217	1.28146	0.0674304
11	A11	56	74.2786	1.26893	0.067785
11	A11	57	74.5355	1.26101	0.0680766
11	A11	58	74.7924	1.25167	0.0683496
11	A11	59	75.0492	1.24447	0.0686149
11	A11	60	75.3061	1.23294	0.0688772
11	A11	61	75.563	1.22312	0.0691487
11	A11	62	75.8199	1.21597	0.0694501
11	A11	63	76.0768	1.20363	0.0697924
11	A11	64	76.3336	1.19782	0.0701505
11	A11	65	76.5905	1.18625	0.0704641
11	A11	66	76.8474	1.17904	0.0706703
11	A11	67	77.1043	1.16337	0.0707522
11	A11	68	77.3611	1.15761	0.0707543
11	A11	69	77.618	1.14721	0.0707375
11	A11	70	77.8749	1.14197	0.0707154
11	A11	71	78.1318	1.13057	0.0706332
11	A11	72	78.3886	1.11718	0.0704165
11	A11	73	78.6455	1.10823	0.0700559
11	A11	74	78.9024	1.10161	0.0696462
11	A11	75	79.1593	1.091	0.0693585
11	A11	76	79.4162	1.08429	0.0693643
11	A11	77	79.673	1.0712	0.069781
11	A11	78	79.9299	1.06503	0.0706594
11	A11	79	80.1868	1.05559	0.0720131
11	A11	80	80.4437	1.04483	0.0738519
11	A11	81	80.7005	1.03469	0.076205
11	A11	82	80.9574	1.02529	0.0791099
11	A11	83	81.2143	1.01492	0.0825709
11	A11	84	81.4712	1.00223	0.0865077
11	A11	85	81.728	0.993633	0.0907473
11	A11	86	81.9849	0.979351	0.0951251
11	A11	87	82.2418	0.964836	0.0997457
11	A11	88	82.4987	0.950311	0.105385
11	A11	89	82.7556	0.932941	0.11393
11	A11	90	83.0124	0.921816	0.128685
11	A11	91	83.2693	0.910401	0.154267
11	A11	92	83.5262	0.894186	0.195842
11	A11	93	83.7831	0.882499	0.257501
11	A11	94	84.0399	0.862405	0.339943
11	A11	95	84.2968	0.832176	0.438213
11	A11	96	84.5537	0.785818	0.540706
11	A11	97	84.8106	0.675914	0.630589
11	A11	98	85.0674	0.518503	0.68988
11	A11	99	85.3243	0.351696	0.704967
11	A11	100	85.5812	0.207286	0.671273
11	A11	101	85.8381	0.101244	0.594907
11	A11	102	86.0949	0.0439169	0.490521
11	A11	103	86.3518	0.0212595	0.376418
11	A11	104	86.6087	0.0134246	0.269166
11	A11	105	86.8656	0.0103696	0.179811
11	A11	106	87.1225	0.00752774	0.112751
11	A11	107	87.3793	0.00568607	0.0669132
11	A11	108	87.6362	0.00457523	0.038094
11	A11	109	87.8931	0.00388524	0.0212368
11	A11	110	88.15	0.00385081	0.0119257
11	A11	111	88.4068	0.00363378	0.00697437
11	A11	112	88.6637	0.00341857	0.0043816
11	A11	113	88.9206	0.00273172	0.00301536
11	A11	114	89.1775	0.00261414	0.00228277
11	A11	115	89.4343	0.00267619	0.00189
11	A11	116	89.6912	0.00245752	0.00169508
11	A11	117	89.9481	0.00243148	0.00162409
11	A11	118	90.205	0.00179972	0.00162665
11	A11	119	90.4619	0.00210339	0.00165834
11	A11	120	90.7187	0.00147843	0.0016813
11	A11	121	90.9756	0.000956796	0.0016723
11	A11	122	91.2325	0.00101054	0.00162764
11	A11	123	91.4894	0.00088569	0.0015591
11	A11	124	91.7462	0.000872896	0.00148299
11	A11	125	92.0031	0.000473812	0.00140976
11	A11	126	92.26	-0.000130047	0.00134036
11	A11	127	92.5169	0.000585938	0.00127028
11	A11	128	92.7737	-0.000189664	0.00119672
11	A11	129	93.0306	-0.000467772	0.00112341
11	A11	130	93.2875	-0.000372806	0.0010592
11	A11	131	93.5444	-0.000192532	0.00101026
11	A11	132	93.8013	-0.000364637	0.000970638
11	A11	133	94.0581	-0.00073714	0.000919595
11	A11	134	94.315	-0.00101886	0.000830924
11	A11	135	94.5719	-0.00121244	0.000690016
11	A11	136	94.8288	-0.00122808	0.000506377
12	A12	1	60.1504	1.72426	0.0752964
12	A12	2	60.4073	1.71403	0.0759687
12	A12	3	60.6642	1.7065	0.076664
12	A12	4	60.921	1.69406	0.0772312
12	A12	5	61.1779	1.68615	0.0775588
12	A12	6	61.4348	1.67514	0.0775979
12	A12	7	61.6917	1.66359	0.077369
12	A12	8	61.9485	1.65292	0.0769558
12	A12	9	62.2054	1.64262	0.0764778
12	A12	10	62.4623	1.63364	0.0760401
12	A12	11	62.7192	1.62171	0.0756897
12	A12	12	62.976	1.61579	0.0754024
12	A12	13	63.2329	1.60388	0.0751207
12	A12	14	63.4898	1.58806	0.0748105
12	A12	15	63.7467	1.58423	0.074487
12	A12	16	64.0035	1.57248	0.0741863
12	A12	17	64.2604	1.56287	0.073913
12	A12	18	64.5173	1.55512	0.073619
12	A12	19	64.7742	1.54154	0.0732281
12	A12	20	65.0311	1.53031	0.0726881
12	A12	21	65.2879	1.52617	0.0720053
12	A12	22	65.5448	1.51217	0.0712551
12	A12	23	65.8017	1.50391	0.0705574
12	A12	24	66.0586	1.49404	0.0700311
12	A12	25	66.3154	1.48499	0.0697398
12	A12	26	66.5723	1.47771	0.0696382
12	A12	27	66.8292	1.46811	0.0695622
12	A12	28	67.0861	1.45894	0.0692834
12	A12	29	67.3429	1.44659	0.0686151
12	A12	30	67.5998	1.43768	0.0675062
12	A12	31	67.8567	1.42904	0.0660659
12	A12	32	68.1136	1.4193	0.0645092
12	A12	33	68.3705	1.4128	0.0630529
12	A12	34	68.6273	1.40487	0.0618327
12	A12	35	68.8842	1.39699	0.0608846
12	A12	36	69.1411	1.38541	0.0601697
12	A12	37	69.398	1.38203	0.0596154
12	A12	38	69.6548	1.37191	0.0591311
12	A12	39	69.9117	1.36303	0.0586063
12	A12	40	70.1686	1.35743	0.0579139
12	A12	41	70.4255	1.34953	0.0569516
12	A12	42	70.6823	1.33929	0.055712
12	A12	43	70.9392	1.3321	0.0543478
12	A12	44	71.1961	1.32342	0.0531569
12	A12	45	71.453	1.32059	0.0524918
12	A12	46	71.7099	1.312	0.0526141
12	A12	47	71.9667	1.30972	0.053581
12	A12	48	72.2236	1.29993	0.0552335
12	A12	49	72.4805	1.2904	0.0572733
12	A12	50	72.7374	1.28635	0.0593819
12	A12	51	72.9942	1.27441	0.0613176
12	A12	52	73.2511	1.26735	0.0629477
12	A12	53	73.508	1.257	0.0642271
12	A12	54	73.7649	1.2496	0.0651566
12	A12	55	74.0217	1.24128	0.0657566
12	A12	56	74.2786	1.23283	0.0660798
12	A12	57	74.5355	1.21806	0.0662257
12	A12	58	74.7924	1.21271	0.0663274
12	A12	59	75.0492	1.20534	0.0664978
12	A12	60	75.3061	1.19827	0.0667715
12	A12	61	75.563	1.18673	0.0671024
12	A12	62	75.8199	1.17395	0.0674234
12	A12	63	76.0768	1.16953	0.0677103
12	A12	64	76.3336	1.15767	0.0679999
12	A12	65	76.5905	1.1514	0.068343
12	A12	66	76.8474	1.14037	0.0687472
12	A12	67	77.1043	1.13153	0.0691532
12	A12	68	77.3611	1.12185	0.0694654
12	A12	69	77.618	1.11211	0.0696106
12	A12	70	77.8749	1.10365	0.0695864
12	A12	71	78.1318	1.09209	0.0694776
12	A12	72	78.3886	1.08337	0.0694241
12	A12	73	78.6455	1.07618	0.0695578
12	A12	74	78.9024	1.06767	0.0699463
12	A12	75	79.1593	1.05673	0.0705635
12	A12	76	79.4162	1.04482	0.0713065
12	A12	77	79.673	1.04002	0.0720466
12	A12	78	79.9299	1.02891	0.0726991
12	A12	79	80.1868	1.01545	0.0732936
12	A12	80	80.4437	1.0063	0.0740082
12	A12	81	80.7005	0.998353	0.0751417
12	A12	82	80.9574	0.988178	0.0770017
12	A12	83	81.2143	0.979525	0.0797604
12	A12	84	81.4712	0.968216	0.0833498
12	A12	85	81.728	0.959373	0.0874833
12	A12	86	81.9849	0.946119	0.0918477
12	A12	87	82.2418	0.926355	0.096448
12	A12	88	82.4987	0.918536	0.102031
12	A12	89	82.7556	0.902392	0.110487
12	A12	90	83.0124	0.887883	0.12509
12	A12	91	83.2693	0.876964	0.15037
12	A12	92	83.5262	0.865409	0.19137
12	A12	93	83.7831	0.849745	0.252114
12	A12	94	84.0399	0.83064	0.333398
12	A12	95	84.2968	0.805225	0.430588
12	A12	96	84.5537	0.748897	0.53258
12	A12	97	84.8106	0.653537	0.623036
12	A12	98	85.0674	0.498406	0.684213
12	A12	99	85.3243	0.332065	0.702299
12	A12	100	85.5812	0.185948	0.672098
12	A12	101	85.8381	0.07744	0.598909
12	A12	102	86.0949	0.0173819	0.496698
12	A12	103	86.3518	-0.00745478	0.383444
12	A12	104	86.6087	-0.0166981	0.2758
12	A12	105	86.8656	-0.0203333	0.185199
12	A12	106	87.1225	-0.0226374	0.116532
12	A12	107	87.3793	-0.024408	0.0691557
12	A12	108	87.6362	-0.0255595	0.0391307
12	A12	109	87.8931	-0.0253793	0.0214896
12	A12	110	88.15	-0.0256616	0.011771
12	A12	111	88.4068	-0.0261193	0.00667379
12	A12	112	88.6637	-0.0263774	0.00407171
12	A12	113	88.9206	-0.0266611	0.00273489
12	A12	114	89.1775	-0.0268416	0.00201291
12	A12	115	89.4343	-0.0272387	0.00159068
12	A12	116	89.6912	-0.0270799	0.00132996
12	A12	117	89.9481	-0.0269793	0.00117428
12	A12	118	90.205	-0.0271501	0.00109604
12	A12	119	90.4619	-0.0279188	0.00107248
12	A12	120	90.7187	-0.027315	0.0010799
12	A12	121	90.9756	-0.0278814	0.00109585
12	A12	122	91.2325	-0.0278108	0.00110177
12	A12	123	91.4894	-0.028149	0.00108457
12	A12	124	91.7462	-0.0282634	0.00103815
12	A12	125	92.0031	-0.0286783	0.000964568
12	A12	126	92.26	-0.0282684	0.000873292
12	A12	127	92.5169	-0.0285507	0.00077765
12	A12	128	92.7737	-0.0288374	0.000690785
12	A12	129	93.0306	-0.0286911	0.000623006
12	A12	130	93.2875	-0.0290179	0.000580074
12	A12	131	93.5444	-0.0284126	0.000560801
12	A12	132	93.8013	-0.0290896	0.000554808
12	A12	133	94.0581	-0.0290786	0.000543836
12	A12	134	94.315	-0.0290208	0.000508708
12	A12	135	94.5719	-0.0294407	0.000439059
12	A12	136	94.8288	-0.0293436	0.000339531
13	A13	1	60.1504	2.06053	0.1036
13	A13	2	60.4073	2.05124	0.104305
13	A13	3	60.6642	2.04254	0.104752
13	A13	4	60.921	2.02636	0.104746
13	A13	5	61.1779	2.01516	0.104271
13	A13	6	61.4348	2.00038	0.103496
13	A13	7	61.6917	1.9942	0.10269
13	A13	8	61.9485	1.98245	0.102116
13	A13	9	62.2054	1.96727	0.101974
13	A13	10	62.4623	1.95493	0.102375
13	A13	11	62.7192	1.94593	0.103304
13	A13	12	62.976	1.93604	0.104584
13	A13	13	63.2329	1.92382	0.105886
13	A13	14	63.4898	1.90874	0.106851
13	A13	15	63.7467	1.89617	0.107264
13	A13	16	64.0035	1.87978	0.107188
13	A13	17	64.2604	1.87106	0.10692
13	A13	18	64.5173	1.85788	0.106808
13	A13	19	64.7742	1.84871	0.107035
13	A13	20	65.0311	1.8356	0.107521
13	A13	21	65.2879	1.82572	0.107995
13	A13	22	65.5448	1.80335	0.108172
13	A13	23	65.8017	1.7976	0.10791
13	A13	24	66.0586	1.78462	0.107258
13	A13	25	66.3154	1.77038	0.106399
13	A13	26	66.5723	1.75936	0.105558
13	A13	27	66.8292	1.74564	0.104908
13	A13	28	67.0861	1.73712	0.104546
13	A13	29	67.3429	1.72419	0.104491
13	A13	30	67.5998	1.71032	0.104736
13	A13	31	67.8567	1.70063	0.105272
13	A13	32	68.1136	1.6845	0.106083
13	A13	33	68.3705	1.67714	0.107105
13	A13	34	68.6273	1.66343	0.108187
13	A13	35	68.8842	1.65312	0.10912
13	A13	36	69.1411	1.63382	0.109716
13	A13	37	69.398	1.62348	0.109894
13	A13	38	69.6548	1.61155	0.109695
13	A13	39	69.9117	1.59872	0.109219
13	A13	40	70.1686	1.58518	0.108552
13	A13	41	70.4255	1.5747	0.107718
13	A13	42	70.6823	1.56083	0.106715
13	A13	43	70.9392	1.54579	0.105549
13	A13	44	71.1961	1.53708	0.104275
13	A13	45	71.453	1.52484	0.102977
13	A13	46	71.7099	1.51261	0.101751
13	A13	47	71.9667	1.5003	0.100691
13	A13	48	72.2236	1.48942	0.0999041
13	A13	49	72.4805	1.4779	0.099496
13	A13	50	72.7374	1.46564	0.0995406
13	A13	51	72.9942	1.45639	0.100023
13	A13	52	73.2511	1.44614	0.1008
13	A13	53	73.508	1.43127	0.101621
13	A13	54	73.7649	1.41876	0.102201
13	A13	55	74.0217	1.41152	0.102327
13	A13	56	74.2786	1.39323	0.101944
13	A13	57	74.5355	1.38179	0.101171
13	A13	58	74.7924	1.37193	0.100247
13	A13	59	75.0492	1.35934	0.0993973
13	A13	60	75.3061	1.35457	0.0987456
13	A13	61	75.563	1.33532	0.0982828
13	A13	62	75.8199	1.32427	0.0979209
13	A13	63	76.0768	1.31814	0.0975739
13	A13	64	76.3336	1.3016	0.0971966
13	A13	65	76.5905	1.2934	0.0967898
13	A13	66	76.8474	1.28098	0.0963823
13	A13	67	77.1043	1.27	0.0960198
13	A13	68	77.3611	1.25811	0.0957555
13	A13	69	77.618	1.24789	0.0956357
13	A13	70	77.8749	1.23885	0.0956788
13	A13	71	78.1318	1.22632	0.0958605
13	A13	72	78.3886	1.21275	0.0961235
13	A13	73	78.6455	1.20564	0.0963978
13	A13	74	78.9024	1.19509	0.0966313
13	A13	75	79.1593	1.1773	0.0968003
13	A13	76	79.4162	1.17061	0.096897
13	A13	77	79.673	1.16106	0.0969008
13	A13	78	79.9299	1.14761	0.0967661
13	A13	79	80.1868	1.13588	0.0964471
13	A13	80	80.4437	1.1248	0.0959491
13	A13	81	80.7005	1.11288	0.0953598
13	A13	82	80.9574	1.10149	0.0948186
13	A13	83	81.2143	1.09358	0.0944459
13	A13	84	81.4712	1.08421	0.0942891
13	A13	85	81.728	1.06981	0.0943428
13	A13	86	81.9849	1.05632	0.0946162
13	A13	87	82.2418	1.0478	0.0952006
13	A13	88	82.4987	1.04191	0.0963036
13	A13	89	82.7556	1.02884	0.098302
13	A13	90	83.0124	1.01185	0.101873
13	A13	91	83.2693	1.00457	0.108213
13	A13	92	83.5262	0.996644	0.119284
13	A13	93	83.7831	0.978453	0.137955
13	A13	94	84.0399	0.970134	0.167923
13	A13	95	84.2968	0.956917	0.21326
13	A13	96	84.5537	0.938006	0.277439
13	A13	97	84.8106	0.914961	0.361833
13	A13	98	85.0674	0.88168	0.463897
13	A13	99	85.3243	0.82776	0.575704
13	A13	100	85.5812	0.749955	0.68372
13	A13	101	85.8381	0.64854	0.770682
13	A13	102	86.0949	0.498486	0.819636
13	A13	103	86.3518	0.339509	0.819024
13	A13	104	86.6087	0.194591	0.766776
13	A13	105	86.8656	0.0911576	0.671403
13	A13	106	87.1225	0.0399234	0.54942
13	A13	107	87.3793	0.0211897	0.420212
13	A13	108	87.6362	0.0141517	0.300664
13	A13	109	87.8931	0.0107303	0.201637
13	A13	110	88.15	0.00916431	0.127171
13	A13	111	88.4068	0.00875221	0.0758725
13	A13	112	88.6637	0.00799157	0.0432706
13	A13	113	88.9206	0.00750708	0.0240224
13	A13	114	89.1775	0.00635102	0.0133636
13	A13	115	89.4343	0.00620793	0.00774052
13	A13	116	89.6912	0.00664123	0.00484701
13	A13	117	89.9481	0.00539339	0.00335849
13	A13	118	90.205	0.00595918	0.00259295
13	A13	119	90.4619	0.00572596	0.0022264
13	A13	120	90.7187	0.00528204	0.00210337
13	A13	121	90.9756	0.00530193	0.00213258
13	A13	122	91.2325	0.00516444	0.00224104
13	A13	123	91.4894	0.00430979	0.00236168
13	A13	124	91.7462	0.00438124	0.00243743
13	A13	125	92.0031	0.00398298	0.0024311
13	A13	126	92.26	0.00328739	0.00233363
13	A13	127	92.5169	0.00341832	0.00216547
13	A13	128	92.7737	0.00291809	0.00196775
13	A13	129	93.0306	0.00310792	0.00178438
13	A13	130	93.2875	0.00295236	0.00164187
13	A13	131	93.5444	0.00293659	0.00153725
13	A13	132	93.8013	0.00230308	0.00144189
13	A13	133	94.0581	0.00198279	0.00131915
13	A13	134	94.315	0.00230433	0.00114548
13	A13	135	94.5719	0.00205118	0.000922418
13	A13	136	94.8288	0.00169688	0.000674616
14	A14	1	60.1504	2.07028	0.104743
14	A14	2	60.4073	2.06462	0.104865
14	A14	3	60.6642	2.04903	0.104927
14	A14	4	60.921	2.03835	0.104933
14	A14	5	61.1779	2.02938	0.104937
14	A14	6	61.4348	2.01783	0.105004
14	A14	7	61.6917	2.00115	0.105179
14	A14	8	61.9485	1.9925	0.105488
14	A14	9	62.2054	1.97906	0.10594
14	A14	10	62.4623	1.96929	0.106531
14	A14	11	62.7192	1.95385	0.107219
14	A14	12	62.976	1.94046	0.107897
14	A14	13	63.2329	1.93324	0.108412
14	A14	14	63.4898	1.92019	0.10862
14	A14	15	63.7467	1.89995	0.108497
14	A14	16	64.0035	1.89084	0.108186
14	A14	17	64.2604	1.87774	0.107944
14	A14	18	64.5173	1.86998	0.107978
14	A14	19	64.7742	1.85328	0.108307
14	A14	20	65.0311	1.84579	0.108727
14	A14	21	65.2879	1.8304	0.108933
14	A14	22	65.5448	1.81347	0.108707
14	A14	23	65.8017	1.80195	0.108051
14	A14	24	66.0586	1.79358	0.107182
14	A14	25	66.3154	1.77748	0.106426
14	A14	26	66.5723	1.76654	0.106066
14	A14	27	66.8292	1.75602	0.106236
14	A14	28	67.0861	1.74436	0.10689
14	A14	29	67.3429	1.73169	0.107845
14	A14	30	67.5998	1.71809	0.10886
14	A14	31	67.8567	1.7057	0.109717
14	A14	32	68.1136	1.6909	0.11025
14	A14	33	68.3705	1.68124	0.110364
14	A14	34	68.6273	1.66931	0.110037
14	A14	35	68.8842	1.6492	0.109338
14	A14	36	69.1411	1.64147	0.108426
14	A14	37	69.398	1.62868	0.107505
14	A14	38	69.6548	1.61598	0.106746
14	A14	39	69.9117	1.60607	0.106219
14	A14	40	70.1686	1.59202	0.105885
14	A14	41	70.4255	1.57906	0.105643
14	A14	42	70.6823	1.56737	0.105395
14	A14	43	70.9392	1.55551	0.105091
14	A14	44	71.1961	1.54437	0.104745
14	A14	45	71.453	1.53061	0.104426
14	A14	46	71.7099	1.51839	0.104231
14	A14	47	71.9667	1.50574	0.10424
14	A14	48	72.2236	1.49913	0.104454
14	A14	49	72.4805	1.48284	0.104761
14	A14	50	72.7374	1.46863	0.104952
14	A14	51	72.9942	1.46201	0.104797
14	A14	52	73.2511	1.44554	0.104148
14	A14	53	73.508	1.43112	0.103033
14	A14	54	73.7649	1.42248	0.101674
14	A14	55	74.0217	1.40806	0.100418
14	A14	56	74.2786	1.40062	0.0995982
14	A14	57	74.5355	1.38706	0.0993907
14	A14	58	74.7924	1.37791	0.0997438
14	A14	59	75.0492	1.36832	0.100429
14	A14	60	75.3061	1.35172	0.101183
14	A14	61	75.563	1.33924	0.101845
14	A14	62	75.8199	1.3289	0.102392
14	A14	63	76.0768	1.31741	0.102853
14	A14	64	76.3336	1.30761	0.103183
14	A14	65	76.5905	1.29485	0.103225
14	A14	66	76.8474	1.27941	0.102812
14	A14	67	77.1043	1.26935	0.101935
14	A14	68	77.3611	1.25147	0.100839
14	A14	69	77.618	1.24495	0.0999224
14	A14	70	77.8749	1.23661	0.0995069
14	A14	71	78.1318	1.22904	0.0996434
14	A14	72	78.3886	1.2106	0.100082
14	A14	73	78.6455	1.19851	0.100428
14	A14	74	78.9024	1.18634	0.100348
14	A14	75	79.1593	1.17828	0.0996995
14	A14	76	79.4162	1.16604	0.0985413
14	A14	77	79.673	1.14951	0.0970739
14	A14	78	79.9299	1.14224	0.0955652
14	A14	79	80.1868	1.13098	0.0942822
14	A14	80	80.4437	1.12311	0.0934202
14	A14	81	80.7005	1.10828	0.093055
14	A14	82	80.9574	1.10152	0.0931381
14	A14	83	81.2143	1.08969	0.0935469
14	A14	84	81.4712	1.07604	0.0941613
14	A14	85	81.728	1.06956	0.0949313
14	A14	86	81.9849	1.05332	0.0959026
14	A14	87	82.2418	1.04694	0.0972103
14	A14	88	82.4987	1.03376	0.0990668
14	A14	89	82.7556	1.02286	0.101801
14	A14	90	83.0124	1.01274	0.105989
14	A14	91	83.2693	0.999931	0.112696
14	A14	92	83.5262	0.984137	0.123761
14	A14	93	83.7831	0.976357	0.142007
14	A14	94	84.0399	0.959466	0.171208
14	A14	95	84.2968	0.949331	0.215644
14	A14	96	84.5537	0.930292	0.279083
14	A14	97	84.8106	0.906517	0.36321
14	A14	98	85.0674	0.875868	0.465722
14	A14	99	85.3243	0.817633	0.578727
14	A14	100	85.5812	0.744595	0.688405
14	A14	101	85.8381	0.642816	0.776858
14	A14	102	86.0949	0.495909	0.826323
14	A14	103	86.3518	0.322979	0.824634
14	A14	104	86.6087	0.172175	0.769688
14	A14	105	86.8656	0.0761844	0.67065
14	A14	106	87.1225	0.0311737	0.545107
14	A14	107	87.3793	0.01418	0.413434
14	A14	108	87.6362	0.0079502	0.292991
14	A14	109	87.8931	0.00436178	0.194494
14	A14	110	88.15	0.00325999	0.121424
14	A14	111	88.4068	0.00251694	0.0717523
14	A14	112	88.6637	0.00183432	0.0405621
14	A14	113	88.9206	0.000992493	0.0223355
14	A14	114	89.1775	0.000401816	0.0123434
14	A14	115	89.4343	0.00101628	0.00715414
14	A14	116	89.6912	0.000602195	0.0045666
14	A14	117	89.9481	-6.05839e-05	0.00330059
14	A14	118	90.205	-0.000744651	0.00266865
14	A14	119	90.4619	-0.000163371	0.00232692
14	A14	120	90.7187	-0.000717866	0.00211448
14	A14	121	90.9756	-0.000761927	0.00195938
14	A14	122	91.2325	-0.00120175	0.00183008
14	A14	123	91.4894	-0.0012988	0.00171718
14	A14	124	91.7462	-0.00192413	0.00162915
14	A14	125	92.0031	-0.00138142	0.0015863
14	A14	126	92.26	-0.00149931	0.00160618
14	A14	127	92.5169	-0.00192941	0.00168636
14	A14	128	92.7737	-0.00242558	0.00179684
14	A14	129	93.0306	-0.00193584	0.00188887
14	A14	130	93.2875	-0.00314402	0.00191564
14	A14	131	93.5444	-0.00329557	0.00185212
14	A14	132	93.8013	-0.0031689	0.00170207
14	A14	133	94.0581	-0.00338409	0.00148895
14	A14	134	94.315	-0.00312713	0.00123921
14	A14	135	94.5719	-0.00353614	0.000971721
14	A14	136	94.8288	-0.00447143	0.000700014
15	A15	1	60.1504	2.07287	0.103259
15	A15	2	60.4073	2.06109	0.103689
15	A15	3	60.6642	2.05045	0.104024
15	A15	4	60.921	2.04679	0.104167
15	A15	5	61.1779	2.02049	0.104093
15	A15	6	61.4348	2.0152	0.103828
15	A15	7	61.6917	2.00562	0.103402
15	A15	8	61.9485	1.99672	0.102862
15	A15	9	62.2054	1.97387	0.102326
15	A15	10	62.4623	1.964	0.102019
15	A15	11	62.7192	1.95737	0.102212
15	A15	12	62.976	1.94465	0.103055
15	A15	13	63.2329	1.93213	0.104438
15	A15	14	63.4898	1.92669	0.105995
15	A15	15	63.7467	1.90463	0.10728
15	A15	16	64.0035	1.88997	0.107984
15	A15	17	64.2604	1.88173	0.108067
15	A15	18	64.5173	1.8706	0.107712
15	A15	19	64.7742	1.85179	0.107183
15	A15	20	65.0311	1.84433	0.106685
15	A15	21	65.2879	1.8306	0.106294
15	A15	22	65.5448	1.82127	0.106005
15	A15	23	65.8017	1.80401	0.105795
15	A15	24	66.0586	1.79169	0.105687
15	A15	25	66.3154	1.78067	0.105711
15	A15	26	66.5723	1.77051	0.10584
15	A15	27	66.8292	1.75982	0.105939
15	A15	28	67.0861	1.74343	0.105818
15	A15	29	67.3429	1.72804	0.105358
15	A15	30	67.5998	1.72114	0.104614
15	A15	31	67.8567	1.70354	0.103819
15	A15	32	68.1136	1.69647	0.103283
15	A15	33	68.3705	1.68091	0.103238
15	A15	34	68.6273	1.67407	0.103723
15	A15	35	68.8842	1.65936	0.104557
15	A15	36	69.1411	1.64773	0.105401
15	A15	37	69.398	1.63325	0.105891
15	A15	38	69.6548	1.62156	0.105781
15	A15	39	69.9117	1.60955	0.105055
15	A15	40	70.1686	1.59338	0.103959
15	A15	41	70.4255	1.5816	0.10291
15	A15	42	70.6823	1.57171	0.102311
15	A15	43	70.9392	1.56409	0.102349
15	A15	44	71.1961	1.55104	0.102888
15	A15	45	71.453	1.53781	0.103545
15	A15	46	71.7099	1.52392	0.103895
15	A15	47	71.9667	1.51122	0.103689
15	A15	48	72.2236	1.4977	0.102946
15	A15	49	72.4805	1.48589	0.101894
15	A15	50	72.7374	1.47845	0.100823
15	A15	51	72.9942	1.46258	0.0999503
15	A15	52	73.2511	1.45154	0.09936
15	A15	53	73.508	1.44226	0.0990333
15	A15	54	73.7649	1.42837	0.0989176
15	A15	55	74.0217	1.41941	0.0989853
15	A15	56	74.2786	1.40422	0.0992476
15	A15	57	74.5355	1.39157	0.0996988
15	A15	58	74.7924	1.38623	0.100241
15	A15	59	75.0492	1.37404	0.100655
15	A15	60	75.3061	1.35668	0.100677
15	A15	61	75.563	1.34626	0.100142
[truncated: 38,835 more rows]
