# Supplementary material for: Transcriptomic identification of HBx-associated hub genes in hepatocellular carcinoma
Source: PeerJ. 2021 Dec 22;9:e12697. doi: 10.7717/peerj.12697 (PMC8710059; doi:10.7717/peerj.12697)
Supplement: Supplemental Information 14 [file peerj-09-12697-s014.xlsx]

## Sheet: Sample Setup
Block Type	384-Well Block
Calibration Background is expired	Yes
Calibration Background performed on	10-12-2018 11:47:46 PDT
Calibration FAM is expired	Yes
Calibration FAM performed on	10-23-2018 10:23:19 PDT
Calibration MELTDOCTOR is expired	Yes
Calibration MELTDOCTOR performed on	09-26-2017 21:22:46 PDT
Calibration NED is expired	Yes
Calibration NED performed on	10-23-2018 10:33:14 PDT
Calibration ROI is expired	Yes
Calibration ROI performed on	10-12-2018 09:37:21 PDT
Calibration ROX is expired	Yes
Calibration ROX performed on	10-23-2018 10:07:21 PDT
Calibration SYBR is expired	Yes
Calibration SYBR performed on	10-23-2018 09:57:53 PDT
Calibration TAMRA is expired	Yes
Calibration TAMRA performed on	10-23-2018 10:45:25 PDT
Calibration Uniformity is expired	Yes
Calibration Uniformity performed on	10-12-2018 10:06:59 PDT
Calibration VIC is expired	Yes
Calibration VIC performed on	10-23-2018 10:54:25 PDT
Chemistry	SYBR_GREEN
Date Created	02-03-2021 22:18:31 PST
Experiment File Name	D:\NZZ\2021-02-03 203555.eds
Experiment Name	2021-02-03 203555
Experiment Run End Time	02-03-2021 15:13:12 PST
Experiment Type	Comparative Cт (ΔΔCт)
Instrument Name	285880860
Instrument Serial Number	285880860
Instrument Type	QuantStudio 12K Flex
Passive Reference	ROX
Quantification Cycle Method	Ct
Signal Smoothing On	true
Stage/ Cycle where Analysis is performed	Stage 2, Step 2
Well	Well Position	Sample Name	Sample Color	Biogroup Name	Biogroup Color	Target Name	Target Color	Task	Reporter	Quencher	Quantity	Comments
1	A1	vec-n	RGB(176,23,31)			mCYC	RGB(176,23,31)	UNKNOWN	SYBR	None
2	A2	vec-n	RGB(176,23,31)			mCYC	RGB(176,23,31)	UNKNOWN	SYBR	None
3	A3	vec-n	RGB(176,23,31)			mCYC	RGB(176,23,31)	UNKNOWN	SYBR	None
4	A4	vec-c	RGB(0,0,255)			mCYC	RGB(176,23,31)	UNKNOWN	SYBR	None
5	A5	vec-c	RGB(0,0,255)			mCYC	RGB(176,23,31)	UNKNOWN	SYBR	None
6	A6	vec-c	RGB(0,0,255)			mCYC	RGB(176,23,31)	UNKNOWN	SYBR	None
7	A7	vec-w9	RGB(0,139,69)			mCYC	RGB(176,23,31)	UNKNOWN	SYBR	None
8	A8	vec-w9	RGB(0,139,69)			mCYC	RGB(176,23,31)	UNKNOWN	SYBR	None
9	A9	vec-w9	RGB(0,139,69)			mCYC	RGB(176,23,31)	UNKNOWN	SYBR	None
10	A10	HBx-n	RGB(255,127,0)			mCYC	RGB(176,23,31)	UNKNOWN	SYBR	None
11	A11	HBx-n	RGB(255,127,0)			mCYC	RGB(176,23,31)	UNKNOWN	SYBR	None
12	A12	HBx-n	RGB(255,127,0)			mCYC	RGB(176,23,31)	UNKNOWN	SYBR	None
13	A13	HBx-w	RGB(139,137,112)			mCYC	RGB(176,23,31)	UNKNOWN	SYBR	None
14	A14	HBx-w	RGB(139,137,112)			mCYC	RGB(176,23,31)	UNKNOWN	SYBR	None
15	A15	HBx-w	RGB(139,137,112)			mCYC	RGB(176,23,31)	UNKNOWN	SYBR	None
16	A16	HBx-w10	RGB(238,121,66)			mCYC	RGB(176,23,31)	UNKNOWN	SYBR	None
17	A17	HBx-w10	RGB(238,121,66)			mCYC	RGB(176,23,31)	UNKNOWN	SYBR	None
18	A18	HBx-w10	RGB(238,121,66)			mCYC	RGB(176,23,31)	UNKNOWN	SYBR	None
19	A19	vec-w1	RGB(142,56,142)			mCYC	RGB(176,23,31)	UNKNOWN	SYBR	None
20	A20	vec-w1	RGB(142,56,142)			mCYC	RGB(176,23,31)	UNKNOWN	SYBR	None
21	A21	vec-w1	RGB(142,56,142)			mCYC	RGB(176,23,31)	UNKNOWN	SYBR	None
22	A22	vec-w1	RGB(142,56,142)			mTAT	RGB(238,238,0)	UNKNOWN	SYBR	None
23	A23	vec-w1	RGB(142,56,142)			mTAT	RGB(238,238,0)	UNKNOWN	SYBR	None
24	A24	vec-w1	RGB(142,56,142)			mTAT	RGB(238,238,0)	UNKNOWN	SYBR	None
25	B1	vec-n	RGB(176,23,31)			mALDOB	RGB(0,0,255)	UNKNOWN	SYBR	None
26	B2	vec-n	RGB(176,23,31)			mALDOB	RGB(0,0,255)	UNKNOWN	SYBR	None
27	B3	vec-n	RGB(176,23,31)			mALDOB	RGB(0,0,255)	UNKNOWN	SYBR	None
28	B4	vec-c	RGB(0,0,255)			mALDOB	RGB(0,0,255)	UNKNOWN	SYBR	None
29	B5	vec-c	RGB(0,0,255)			mALDOB	RGB(0,0,255)	UNKNOWN	SYBR	None
30	B6	vec-c	RGB(0,0,255)			mALDOB	RGB(0,0,255)	UNKNOWN	SYBR	None
31	B7	vec-w9	RGB(0,139,69)			mALDOB	RGB(0,0,255)	UNKNOWN	SYBR	None
32	B8	vec-w9	RGB(0,139,69)			mALDOB	RGB(0,0,255)	UNKNOWN	SYBR	None
33	B9	vec-w9	RGB(0,139,69)			mALDOB	RGB(0,0,255)	UNKNOWN	SYBR	None
34	B10	HBx-n	RGB(255,127,0)			mALDOB	RGB(0,0,255)	UNKNOWN	SYBR	None
35	B11	HBx-n	RGB(255,127,0)			mALDOB	RGB(0,0,255)	UNKNOWN	SYBR	None
36	B12	HBx-n	RGB(255,127,0)			mALDOB	RGB(0,0,255)	UNKNOWN	SYBR	None
37	B13	HBx-w	RGB(139,137,112)			mALDOB	RGB(0,0,255)	UNKNOWN	SYBR	None
38	B14	HBx-w	RGB(139,137,112)			mALDOB	RGB(0,0,255)	UNKNOWN	SYBR	None
39	B15	HBx-w	RGB(139,137,112)			mALDOB	RGB(0,0,255)	UNKNOWN	SYBR	None
40	B16	HBx-w10	RGB(238,121,66)			mALDOB	RGB(0,0,255)	UNKNOWN	SYBR	None
41	B17	HBx-w10	RGB(238,121,66)			mALDOB	RGB(0,0,255)	UNKNOWN	SYBR	None
42	B18	HBx-w10	RGB(238,121,66)			mALDOB	RGB(0,0,255)	UNKNOWN	SYBR	None
43	B19
44	B20
45	B21
46	B22
47	B23
48	B24
49	C1	vec-n	RGB(176,23,31)			mALDH8A1	RGB(0,139,69)	UNKNOWN	SYBR	None
50	C2	vec-n	RGB(176,23,31)			mALDH8A1	RGB(0,139,69)	UNKNOWN	SYBR	None
51	C3	vec-n	RGB(176,23,31)			mALDH8A1	RGB(0,139,69)	UNKNOWN	SYBR	None
52	C4	vec-c	RGB(0,0,255)			mALDH8A1	RGB(0,139,69)	UNKNOWN	SYBR	None
53	C5	vec-c	RGB(0,0,255)			mALDH8A1	RGB(0,139,69)	UNKNOWN	SYBR	None
54	C6	vec-c	RGB(0,0,255)			mALDH8A1	RGB(0,139,69)	UNKNOWN	SYBR	None
55	C7	vec-w9	RGB(0,139,69)			mALDH8A1	RGB(0,139,69)	UNKNOWN	SYBR	None
56	C8	vec-w9	RGB(0,139,69)			mALDH8A1	RGB(0,139,69)	UNKNOWN	SYBR	None
57	C9	vec-w9	RGB(0,139,69)			mALDH8A1	RGB(0,139,69)	UNKNOWN	SYBR	None
58	C10	HBx-n	RGB(255,127,0)			mALDH8A1	RGB(0,139,69)	UNKNOWN	SYBR	None
59	C11	HBx-n	RGB(255,127,0)			mALDH8A1	RGB(0,139,69)	UNKNOWN	SYBR	None
60	C12	HBx-n	RGB(255,127,0)			mALDH8A1	RGB(0,139,69)	UNKNOWN	SYBR	None
61	C13	HBx-w	RGB(139,137,112)			mALDH8A1	RGB(0,139,69)	UNKNOWN	SYBR	None
62	C14	HBx-w	RGB(139,137,112)			mALDH8A1	RGB(0,139,69)	UNKNOWN	SYBR	None
63	C15	HBx-w	RGB(139,137,112)			mALDH8A1	RGB(0,139,69)	UNKNOWN	SYBR	None
64	C16	HBx-w10	RGB(238,121,66)			mALDH8A1	RGB(0,139,69)	UNKNOWN	SYBR	None
65	C17	HBx-w10	RGB(238,121,66)			mALDH8A1	RGB(0,139,69)	UNKNOWN	SYBR	None
66	C18	HBx-w10	RGB(238,121,66)			mALDH8A1	RGB(0,139,69)	UNKNOWN	SYBR	None
67	C19
68	C20
69	C21
70	C22
71	C23
72	C24
73	D1	vec-n	RGB(176,23,31)			mTAT	RGB(238,238,0)	UNKNOWN	SYBR	None
74	D2	vec-n	RGB(176,23,31)			mTAT	RGB(238,238,0)	UNKNOWN	SYBR	None
75	D3	vec-n	RGB(176,23,31)			mTAT	RGB(238,238,0)	UNKNOWN	SYBR	None
76	D4	vec-c	RGB(0,0,255)			mTAT	RGB(238,238,0)	UNKNOWN	SYBR	None
77	D5	vec-c	RGB(0,0,255)			mTAT	RGB(238,238,0)	UNKNOWN	SYBR	None
78	D6	vec-c	RGB(0,0,255)			mTAT	RGB(238,238,0)	UNKNOWN	SYBR	None
79	D7	vec-w9	RGB(0,139,69)			mTAT	RGB(238,238,0)	UNKNOWN	SYBR	None
80	D8	vec-w9	RGB(0,139,69)			mTAT	RGB(238,238,0)	UNKNOWN	SYBR	None
81	D9	vec-w9	RGB(0,139,69)			mTAT	RGB(238,238,0)	UNKNOWN	SYBR	None
82	D10	HBx-n	RGB(255,127,0)			mTAT	RGB(238,238,0)	UNKNOWN	SYBR	None
83	D11	HBx-n	RGB(255,127,0)			mTAT	RGB(238,238,0)	UNKNOWN	SYBR	None
84	D12	HBx-n	RGB(255,127,0)			mTAT	RGB(238,238,0)	UNKNOWN	SYBR	None
85	D13	HBx-w	RGB(139,137,112)			mTAT	RGB(238,238,0)	UNKNOWN	SYBR	None
86	D14	HBx-w	RGB(139,137,112)			mTAT	RGB(238,238,0)	UNKNOWN	SYBR	None
87	D15	HBx-w	RGB(139,137,112)			mTAT	RGB(238,238,0)	UNKNOWN	SYBR	None
88	D16	HBx-w10	RGB(238,121,66)			mTAT	RGB(238,238,0)	UNKNOWN	SYBR	None
89	D17	HBx-w10	RGB(238,121,66)			mTAT	RGB(238,238,0)	UNKNOWN	SYBR	None
90	D18	HBx-w10	RGB(238,121,66)			mTAT	RGB(238,238,0)	UNKNOWN	SYBR	None
91	D19
92	D20
93	D21
94	D22
95	D23
96	D24
97	E1	vec-n	RGB(176,23,31)			mANGPTL6	RGB(139,137,112)	UNKNOWN	SYBR	None
98	E2	vec-n	RGB(176,23,31)			mANGPTL6	RGB(139,137,112)	UNKNOWN	SYBR	None
99	E3	vec-n	RGB(176,23,31)			mANGPTL6	RGB(139,137,112)	UNKNOWN	SYBR	None
100	E4	vec-c	RGB(0,0,255)			mANGPTL6	RGB(139,137,112)	UNKNOWN	SYBR	None
101	E5	vec-c	RGB(0,0,255)			mANGPTL6	RGB(139,137,112)	UNKNOWN	SYBR	None
102	E6	vec-c	RGB(0,0,255)			mANGPTL6	RGB(139,137,112)	UNKNOWN	SYBR	None
103	E7	vec-w9	RGB(0,139,69)			mANGPTL6	RGB(139,137,112)	UNKNOWN	SYBR	None
104	E8	vec-w9	RGB(0,139,69)			mANGPTL6	RGB(139,137,112)	UNKNOWN	SYBR	None
105	E9	vec-w9	RGB(0,139,69)			mANGPTL6	RGB(139,137,112)	UNKNOWN	SYBR	None
106	E10	HBx-n	RGB(255,127,0)			mANGPTL6	RGB(139,137,112)	UNKNOWN	SYBR	None
107	E11	HBx-n	RGB(255,127,0)			mANGPTL6	RGB(139,137,112)	UNKNOWN	SYBR	None
108	E12	HBx-n	RGB(255,127,0)			mANGPTL6	RGB(139,137,112)	UNKNOWN	SYBR	None
109	E13	HBx-w	RGB(139,137,112)			mANGPTL6	RGB(139,137,112)	UNKNOWN	SYBR	None
110	E14	HBx-w	RGB(139,137,112)			mANGPTL6	RGB(139,137,112)	UNKNOWN	SYBR	None
111	E15	HBx-w	RGB(139,137,112)			mANGPTL6	RGB(139,137,112)	UNKNOWN	SYBR	None
112	E16	HBx-w10	RGB(238,121,66)			mANGPTL6	RGB(139,137,112)	UNKNOWN	SYBR	None
113	E17	HBx-w10	RGB(238,121,66)			mANGPTL6	RGB(139,137,112)	UNKNOWN	SYBR	None
114	E18	HBx-w10	RGB(238,121,66)			mANGPTL6	RGB(139,137,112)	UNKNOWN	SYBR	None
115	E19
116	E20
117	E21
118	E22
119	E23
120	E24
121	F1	vec-n	RGB(176,23,31)			mMAGEA6	RGB(238,121,66)	UNKNOWN	SYBR	None
122	F2	vec-n	RGB(176,23,31)			mMAGEA6	RGB(238,121,66)	UNKNOWN	SYBR	None
123	F3	vec-n	RGB(176,23,31)			mMAGEA6	RGB(238,121,66)	UNKNOWN	SYBR	None
124	F4	vec-c	RGB(0,0,255)			mMAGEA6	RGB(238,121,66)	UNKNOWN	SYBR	None
125	F5	vec-c	RGB(0,0,255)			mMAGEA6	RGB(238,121,66)	UNKNOWN	SYBR	None
126	F6	vec-c	RGB(0,0,255)			mMAGEA6	RGB(238,121,66)	UNKNOWN	SYBR	None
127	F7	vec-w9	RGB(0,139,69)			mMAGEA6	RGB(238,121,66)	UNKNOWN	SYBR	None
128	F8	vec-w9	RGB(0,139,69)			mMAGEA6	RGB(238,121,66)	UNKNOWN	SYBR	None
129	F9	vec-w9	RGB(0,139,69)			mMAGEA6	RGB(238,121,66)	UNKNOWN	SYBR	None
130	F10	HBx-n	RGB(255,127,0)			mMAGEA6	RGB(238,121,66)	UNKNOWN	SYBR	None
131	F11	HBx-n	RGB(255,127,0)			mMAGEA6	RGB(238,121,66)	UNKNOWN	SYBR	None
132	F12	HBx-n	RGB(255,127,0)			mMAGEA6	RGB(238,121,66)	UNKNOWN	SYBR	None
133	F13	HBx-w	RGB(139,137,112)			mMAGEA6	RGB(238,121,66)	UNKNOWN	SYBR	None
134	F14	HBx-w	RGB(139,137,112)			mMAGEA6	RGB(238,121,66)	UNKNOWN	SYBR	None
135	F15	HBx-w	RGB(139,137,112)			mMAGEA6	RGB(238,121,66)	UNKNOWN	SYBR	None
136	F16	HBx-w10	RGB(238,121,66)			mMAGEA6	RGB(238,121,66)	UNKNOWN	SYBR	None
137	F17	HBx-w10	RGB(238,121,66)			mMAGEA6	RGB(238,121,66)	UNKNOWN	SYBR	None
138	F18	HBx-w10	RGB(238,121,66)			mMAGEA6	RGB(238,121,66)	UNKNOWN	SYBR	None
139	F19
140	F20
141	F21
142	F22
143	F23
144	F24
145	G1	vec-n	RGB(176,23,31)			mGNAL	RGB(142,56,142)	UNKNOWN	SYBR	None
146	G2	vec-n	RGB(176,23,31)			mGNAL	RGB(142,56,142)	UNKNOWN	SYBR	None
147	G3	vec-n	RGB(176,23,31)			mGNAL	RGB(142,56,142)	UNKNOWN	SYBR	None
148	G4	vec-c	RGB(0,0,255)			mGNAL	RGB(142,56,142)	UNKNOWN	SYBR	None
149	G5	vec-c	RGB(0,0,255)			mGNAL	RGB(142,56,142)	UNKNOWN	SYBR	None
150	G6	vec-c	RGB(0,0,255)			mGNAL	RGB(142,56,142)	UNKNOWN	SYBR	None
151	G7	vec-w9	RGB(0,139,69)			mGNAL	RGB(142,56,142)	UNKNOWN	SYBR	None
152	G8	vec-w9	RGB(0,139,69)			mGNAL	RGB(142,56,142)	UNKNOWN	SYBR	None
153	G9	vec-w9	RGB(0,139,69)			mGNAL	RGB(142,56,142)	UNKNOWN	SYBR	None
154	G10	HBx-n	RGB(255,127,0)			mGNAL	RGB(142,56,142)	UNKNOWN	SYBR	None
155	G11	HBx-n	RGB(255,127,0)			mGNAL	RGB(142,56,142)	UNKNOWN	SYBR	None
156	G12	HBx-n	RGB(255,127,0)			mGNAL	RGB(142,56,142)	UNKNOWN	SYBR	None
157	G13	HBx-w	RGB(139,137,112)			mGNAL	RGB(142,56,142)	UNKNOWN	SYBR	None
158	G14	HBx-w	RGB(139,137,112)			mGNAL	RGB(142,56,142)	UNKNOWN	SYBR	None
159	G15	HBx-w	RGB(139,137,112)			mGNAL	RGB(142,56,142)	UNKNOWN	SYBR	None
160	G16	HBx-w10	RGB(238,121,66)			mGNAL	RGB(142,56,142)	UNKNOWN	SYBR	None
161	G17	HBx-w10	RGB(238,121,66)			mGNAL	RGB(142,56,142)	UNKNOWN	SYBR	None
162	G18	HBx-w10	RGB(238,121,66)			mGNAL	RGB(142,56,142)	UNKNOWN	SYBR	None
163	G19
164	G20
165	G21
166	G22
167	G23
168	G24
169	H1	vec-n	RGB(176,23,31)			mRGS5	RGB(198,113,113)	UNKNOWN	SYBR	None
170	H2	vec-n	RGB(176,23,31)			mRGS5	RGB(198,113,113)	UNKNOWN	SYBR	None
171	H3	vec-n	RGB(176,23,31)			mRGS5	RGB(198,113,113)	UNKNOWN	SYBR	None
172	H4	vec-c	RGB(0,0,255)			mRGS5	RGB(198,113,113)	UNKNOWN	SYBR	None
173	H5	vec-c	RGB(0,0,255)			mRGS5	RGB(198,113,113)	UNKNOWN	SYBR	None
174	H6	vec-c	RGB(0,0,255)			mRGS5	RGB(198,113,113)	UNKNOWN	SYBR	None
175	H7	vec-w9	RGB(0,139,69)			mRGS5	RGB(198,113,113)	UNKNOWN	SYBR	None
176	H8	vec-w9	RGB(0,139,69)			mRGS5	RGB(198,113,113)	UNKNOWN	SYBR	None
177	H9	vec-w9	RGB(0,139,69)			mRGS5	RGB(198,113,113)	UNKNOWN	SYBR	None
178	H10	HBx-n	RGB(255,127,0)			mRGS5	RGB(198,113,113)	UNKNOWN	SYBR	None
179	H11	HBx-n	RGB(255,127,0)			mRGS5	RGB(198,113,113)	UNKNOWN	SYBR	None
180	H12	HBx-n	RGB(255,127,0)			mRGS5	RGB(198,113,113)	UNKNOWN	SYBR	None
181	H13	HBx-w	RGB(139,137,112)			mRGS5	RGB(198,113,113)	UNKNOWN	SYBR	None
182	H14	HBx-w	RGB(139,137,112)			mRGS5	RGB(198,113,113)	UNKNOWN	SYBR	None
183	H15	HBx-w	RGB(139,137,112)			mRGS5	RGB(198,113,113)	UNKNOWN	SYBR	None
184	H16	HBx-w10	RGB(238,121,66)			mRGS5	RGB(198,113,113)	UNKNOWN	SYBR	None
185	H17	HBx-w10	RGB(238,121,66)			mRGS5	RGB(198,113,113)	UNKNOWN	SYBR	None
186	H18	HBx-w10	RGB(238,121,66)			mRGS5	RGB(198,113,113)	UNKNOWN	SYBR	None
187	H19
188	H20
189	H21
190	H22
191	H23
192	H24
193	I1	vec-n	RGB(176,23,31)			mFAM110C	RGB(0,245,255)	UNKNOWN	SYBR	None
194	I2	vec-n	RGB(176,23,31)			mFAM110C	RGB(0,245,255)	UNKNOWN	SYBR	None
195	I3	vec-n	RGB(176,23,31)			mFAM110C	RGB(0,245,255)	UNKNOWN	SYBR	None
196	I4	vec-c	RGB(0,0,255)			mFAM110C	RGB(0,245,255)	UNKNOWN	SYBR	None
197	I5	vec-c	RGB(0,0,255)			mFAM110C	RGB(0,245,255)	UNKNOWN	SYBR	None
198	I6	vec-c	RGB(0,0,255)			mFAM110C	RGB(0,245,255)	UNKNOWN	SYBR	None
199	I7	vec-w9	RGB(0,139,69)			mFAM110C	RGB(0,245,255)	UNKNOWN	SYBR	None
200	I8	vec-w9	RGB(0,139,69)			mFAM110C	RGB(0,245,255)	UNKNOWN	SYBR	None
201	I9	vec-w9	RGB(0,139,69)			mFAM110C	RGB(0,245,255)	UNKNOWN	SYBR	None
202	I10	HBx-n	RGB(255,127,0)			mFAM110C	RGB(0,245,255)	UNKNOWN	SYBR	None
203	I11	HBx-n	RGB(255,127,0)			mFAM110C	RGB(0,245,255)	UNKNOWN	SYBR	None
204	I12	HBx-n	RGB(255,127,0)			mFAM110C	RGB(0,245,255)	UNKNOWN	SYBR	None
205	I13	HBx-w	RGB(139,137,112)			mFAM110C	RGB(0,245,255)	UNKNOWN	SYBR	None
206	I14	HBx-w	RGB(139,137,112)			mFAM110C	RGB(0,245,255)	UNKNOWN	SYBR	None
207	I15	HBx-w	RGB(139,137,112)			mFAM110C	RGB(0,245,255)	UNKNOWN	SYBR	None
208	I16	HBx-w10	RGB(238,121,66)			mFAM110C	RGB(0,245,255)	UNKNOWN	SYBR	None
209	I17	HBx-w10	RGB(238,121,66)			mFAM110C	RGB(0,245,255)	UNKNOWN	SYBR	None
210	I18	HBx-w10	RGB(238,121,66)			mFAM110C	RGB(0,245,255)	UNKNOWN	SYBR	None
211	I19
212	I20
213	I21
214	I22
215	I23
216	I24
217	J1	vec-n	RGB(176,23,31)			HBx	RGB(238,220,130)	UNKNOWN	SYBR	None
218	J2	vec-n	RGB(176,23,31)			HBx	RGB(238,220,130)	UNKNOWN	SYBR	None
219	J3	vec-n	RGB(176,23,31)			HBx	RGB(238,220,130)	UNKNOWN	SYBR	None
220	J4	vec-c	RGB(0,0,255)			HBx	RGB(238,220,130)	UNKNOWN	SYBR	None
221	J5	vec-c	RGB(0,0,255)			HBx	RGB(238,220,130)	UNKNOWN	SYBR	None
222	J6	vec-c	RGB(0,0,255)			HBx	RGB(238,220,130)	UNKNOWN	SYBR	None
223	J7	vec-w9	RGB(0,139,69)			HBx	RGB(238,220,130)	UNKNOWN	SYBR	None
224	J8	vec-w9	RGB(0,139,69)			HBx	RGB(238,220,130)	UNKNOWN	SYBR	None
225	J9	vec-w9	RGB(0,139,69)			HBx	RGB(238,220,130)	UNKNOWN	SYBR	None
226	J10	HBx-n	RGB(255,127,0)			HBx	RGB(238,220,130)	UNKNOWN	SYBR	None
227	J11	HBx-n	RGB(255,127,0)			HBx	RGB(238,220,130)	UNKNOWN	SYBR	None
228	J12	HBx-n	RGB(255,127,0)			HBx	RGB(238,220,130)	UNKNOWN	SYBR	None
229	J13	HBx-w	RGB(139,137,112)			HBx	RGB(238,220,130)	UNKNOWN	SYBR	None
230	J14	HBx-w	RGB(139,137,112)			HBx	RGB(238,220,130)	UNKNOWN	SYBR	None
231	J15	HBx-w	RGB(139,137,112)			HBx	RGB(238,220,130)	UNKNOWN	SYBR	None
232	J16	HBx-w10	RGB(238,121,66)			HBx	RGB(238,220,130)	UNKNOWN	SYBR	None
233	J17	HBx-w10	RGB(238,121,66)			HBx	RGB(238,220,130)	UNKNOWN	SYBR	None
234	J18	HBx-w10	RGB(238,121,66)			HBx	RGB(238,220,130)	UNKNOWN	SYBR	None
235	J19
236	J20
237	J21
238	J22
239	J23
240	J24
241	K1	vec-n	RGB(176,23,31)			mARG1	RGB(255,127,0)	UNKNOWN	SYBR	None
242	K2	vec-n	RGB(176,23,31)			mARG1	RGB(255,127,0)	UNKNOWN	SYBR	None
243	K3	vec-n	RGB(176,23,31)			mARG1	RGB(255,127,0)	UNKNOWN	SYBR	None
244	K4	vec-c	RGB(0,0,255)			mARG1	RGB(255,127,0)	UNKNOWN	SYBR	None
245	K5	vec-c	RGB(0,0,255)			mARG1	RGB(255,127,0)	UNKNOWN	SYBR	None
246	K6	vec-c	RGB(0,0,255)			mARG1	RGB(255,127,0)	UNKNOWN	SYBR	None
247	K7	vec-w9	RGB(0,139,69)			mARG1	RGB(255,127,0)	UNKNOWN	SYBR	None
248	K8	vec-w9	RGB(0,139,69)			mARG1	RGB(255,127,0)	UNKNOWN	SYBR	None
249	K9	vec-w9	RGB(0,139,69)			mARG1	RGB(255,127,0)	UNKNOWN	SYBR	None
250	K10	HBx-n	RGB(255,127,0)			mARG1	RGB(255,127,0)	UNKNOWN	SYBR	None
251	K11	HBx-n	RGB(255,127,0)			mARG1	RGB(255,127,0)	UNKNOWN	SYBR	None
252	K12	HBx-n	RGB(255,127,0)			mARG1	RGB(255,127,0)	UNKNOWN	SYBR	None
253	K13	HBx-w	RGB(139,137,112)			mARG1	RGB(255,127,0)	UNKNOWN	SYBR	None
254	K14	HBx-w	RGB(139,137,112)			mARG1	RGB(255,127,0)	UNKNOWN	SYBR	None
255	K15	HBx-w	RGB(139,137,112)			mARG1	RGB(255,127,0)	UNKNOWN	SYBR	None
256	K16	HBx-w10	RGB(238,121,66)			mARG1	RGB(255,127,0)	UNKNOWN	SYBR	None
257	K17	HBx-w10	RGB(238,121,66)			mARG1	RGB(255,127,0)	UNKNOWN	SYBR	None
258	K18	HBx-w10	RGB(238,121,66)			mARG1	RGB(255,127,0)	UNKNOWN	SYBR	None
259	K19
260	K20
261	K21
262	K22
263	K23
264	K24
265	L1	vec-n	RGB(176,23,31)			mPALM2	RGB(142,142,56)	UNKNOWN	SYBR	None
266	L2	vec-n	RGB(176,23,31)			mPALM2	RGB(142,142,56)	UNKNOWN	SYBR	None
267	L3	vec-n	RGB(176,23,31)			mPALM2	RGB(142,142,56)	UNKNOWN	SYBR	None
268	L4	vec-c	RGB(0,0,255)			mPALM2	RGB(142,142,56)	UNKNOWN	SYBR	None
269	L5	vec-c	RGB(0,0,255)			mPALM2	RGB(142,142,56)	UNKNOWN	SYBR	None
270	L6	vec-c	RGB(0,0,255)			mPALM2	RGB(142,142,56)	UNKNOWN	SYBR	None
271	L7	vec-w9	RGB(0,139,69)			mPALM2	RGB(142,142,56)	UNKNOWN	SYBR	None
272	L8	vec-w9	RGB(0,139,69)			mPALM2	RGB(142,142,56)	UNKNOWN	SYBR	None
273	L9	vec-w9	RGB(0,139,69)			mPALM2	RGB(142,142,56)	UNKNOWN	SYBR	None
274	L10	HBx-n	RGB(255,127,0)			mPALM2	RGB(142,142,56)	UNKNOWN	SYBR	None
275	L11	HBx-n	RGB(255,127,0)			mPALM2	RGB(142,142,56)	UNKNOWN	SYBR	None
276	L12	HBx-n	RGB(255,127,0)			mPALM2	RGB(142,142,56)	UNKNOWN	SYBR	None
277	L13	HBx-w	RGB(139,137,112)			mPALM2	RGB(142,142,56)	UNKNOWN	SYBR	None
278	L14	HBx-w	RGB(139,137,112)			mPALM2	RGB(142,142,56)	UNKNOWN	SYBR	None
279	L15	HBx-w	RGB(139,137,112)			mPALM2	RGB(142,142,56)	UNKNOWN	SYBR	None
280	L16	HBx-w10	RGB(238,121,66)			mPALM2	RGB(142,142,56)	UNKNOWN	SYBR	None
281	L17	HBx-w10	RGB(238,121,66)			mPALM2	RGB(142,142,56)	UNKNOWN	SYBR	None
282	L18	HBx-w10	RGB(238,121,66)			mPALM2	RGB(142,142,56)	UNKNOWN	SYBR	None
283	L19
284	L20
285	L21
286	L22
287	L23
288	L24
289	M1	vec-n	RGB(176,23,31)			mC8A	RGB(238,44,44)	UNKNOWN	SYBR	None
290	M2	vec-n	RGB(176,23,31)			mC8A	RGB(238,44,44)	UNKNOWN	SYBR	None
291	M3	vec-n	RGB(176,23,31)			mC8A	RGB(238,44,44)	UNKNOWN	SYBR	None
292	M4	vec-c	RGB(0,0,255)			mC8A	RGB(238,44,44)	UNKNOWN	SYBR	None
293	M5	vec-c	RGB(0,0,255)			mC8A	RGB(238,44,44)	UNKNOWN	SYBR	None
294	M6	vec-c	RGB(0,0,255)			mC8A	RGB(238,44,44)	UNKNOWN	SYBR	None
295	M7	vec-w9	RGB(0,139,69)			mC8A	RGB(238,44,44)	UNKNOWN	SYBR	None
296	M8	vec-w9	RGB(0,139,69)			mC8A	RGB(238,44,44)	UNKNOWN	SYBR	None
297	M9	vec-w9	RGB(0,139,69)			mC8A	RGB(238,44,44)	UNKNOWN	SYBR	None
298	M10	HBx-n	RGB(255,127,0)			mC8A	RGB(238,44,44)	UNKNOWN	SYBR	None
299	M11	HBx-n	RGB(255,127,0)			mC8A	RGB(238,44,44)	UNKNOWN	SYBR	None
300	M12	HBx-n	RGB(255,127,0)			mC8A	RGB(238,44,44)	UNKNOWN	SYBR	None
301	M13	HBx-w	RGB(139,137,112)			mC8A	RGB(238,44,44)	UNKNOWN	SYBR	None
302	M14	HBx-w	RGB(139,137,112)			mC8A	RGB(238,44,44)	UNKNOWN	SYBR	None
303	M15	HBx-w	RGB(139,137,112)			mC8A	RGB(238,44,44)	UNKNOWN	SYBR	None
304	M16	HBx-w10	RGB(238,121,66)			mC8A	RGB(238,44,44)	UNKNOWN	SYBR	None
305	M17	HBx-w10	RGB(238,121,66)			mC8A	RGB(238,44,44)	UNKNOWN	SYBR	None
306	M18	HBx-w10	RGB(238,121,66)			mC8A	RGB(238,44,44)	UNKNOWN	SYBR	None
307	M19
308	M20
309	M21
310	M22
311	M23
312	M24
313	N1	vec-n	RGB(176,23,31)			mCPEB3	RGB(51,161,201)	UNKNOWN	SYBR	None
314	N2	vec-n	RGB(176,23,31)			mCPEB3	RGB(51,161,201)	UNKNOWN	SYBR	None
315	N3	vec-n	RGB(176,23,31)			mCPEB3	RGB(51,161,201)	UNKNOWN	SYBR	None
316	N4	vec-c	RGB(0,0,255)			mCPEB3	RGB(51,161,201)	UNKNOWN	SYBR	None
317	N5	vec-c	RGB(0,0,255)			mCPEB3	RGB(51,161,201)	UNKNOWN	SYBR	None
318	N6	vec-c	RGB(0,0,255)			mCPEB3	RGB(51,161,201)	UNKNOWN	SYBR	None
319	N7	vec-w9	RGB(0,139,69)			mCPEB3	RGB(51,161,201)	UNKNOWN	SYBR	None
320	N8	vec-w9	RGB(0,139,69)			mCPEB3	RGB(51,161,201)	UNKNOWN	SYBR	None
321	N9	vec-w9	RGB(0,139,69)			mCPEB3	RGB(51,161,201)	UNKNOWN	SYBR	None
322	N10	HBx-n	RGB(255,127,0)			mCPEB3	RGB(51,161,201)	UNKNOWN	SYBR	None
323	N11	HBx-n	RGB(255,127,0)			mCPEB3	RGB(51,161,201)	UNKNOWN	SYBR	None
324	N12	HBx-n	RGB(255,127,0)			mCPEB3	RGB(51,161,201)	UNKNOWN	SYBR	None
325	N13	HBx-w	RGB(139,137,112)			mCPEB3	RGB(51,161,201)	UNKNOWN	SYBR	None
326	N14	HBx-w	RGB(139,137,112)			mCPEB3	RGB(51,161,201)	UNKNOWN	SYBR	None
327	N15	HBx-w	RGB(139,137,112)			mCPEB3	RGB(51,161,201)	UNKNOWN	SYBR	None
328	N16	HBx-w10	RGB(238,121,66)			mCPEB3	RGB(51,161,201)	UNKNOWN	SYBR	None
329	N17	HBx-w10	RGB(238,121,66)			mCPEB3	RGB(51,161,201)	UNKNOWN	SYBR	None
330	N18	HBx-w10	RGB(238,121,66)			mCPEB3	RGB(51,161,201)	UNKNOWN	SYBR	None
331	N19
332	N20
333	N21
334	N22
335	N23
336	N24
337	O1	vec-n	RGB(176,23,31)			mSERPINE1	RGB(238,18,137)	UNKNOWN	SYBR	None
338	O2	vec-n	RGB(176,23,31)			mSERPINE1	RGB(238,18,137)	UNKNOWN	SYBR	None
339	O3	vec-n	RGB(176,23,31)			mSERPINE1	RGB(238,18,137)	UNKNOWN	SYBR	None
340	O4	vec-c	RGB(0,0,255)			mSERPINE1	RGB(238,18,137)	UNKNOWN	SYBR	None
341	O5	vec-c	RGB(0,0,255)			mSERPINE1	RGB(238,18,137)	UNKNOWN	SYBR	None
342	O6	vec-c	RGB(0,0,255)			mSERPINE1	RGB(238,18,137)	UNKNOWN	SYBR	None
343	O7	vec-w9	RGB(0,139,69)			mSERPINE1	RGB(238,18,137)	UNKNOWN	SYBR	None
344	O8	vec-w9	RGB(0,139,69)			mSERPINE1	RGB(238,18,137)	UNKNOWN	SYBR	None
345	O9	vec-w9	RGB(0,139,69)			mSERPINE1	RGB(238,18,137)	UNKNOWN	SYBR	None
346	O10	HBx-n	RGB(255,127,0)			mSERPINE1	RGB(238,18,137)	UNKNOWN	SYBR	None
347	O11	HBx-n	RGB(255,127,0)			mSERPINE1	RGB(238,18,137)	UNKNOWN	SYBR	None
348	O12	HBx-n	RGB(255,127,0)			mSERPINE1	RGB(238,18,137)	UNKNOWN	SYBR	None
349	O13	HBx-w	RGB(139,137,112)			mSERPINE1	RGB(238,18,137)	UNKNOWN	SYBR	None
350	O14	HBx-w	RGB(139,137,112)			mSERPINE1	RGB(238,18,137)	UNKNOWN	SYBR	None
351	O15	HBx-w	RGB(139,137,112)			mSERPINE1	RGB(238,18,137)	UNKNOWN	SYBR	None
352	O16	HBx-w10	RGB(238,121,66)			mSERPINE1	RGB(238,18,137)	UNKNOWN	SYBR	None
353	O17	HBx-w10	RGB(238,121,66)			mSERPINE1	RGB(238,18,137)	UNKNOWN	SYBR	None
354	O18	HBx-w10	RGB(238,121,66)			mSERPINE1	RGB(238,18,137)	UNKNOWN	SYBR	None
355	O19
356	O20
357	O21
358	O22
359	O23
360	O24
361	P1	vec-n	RGB(176,23,31)			mCTSD	RGB(176,23,31)	UNKNOWN	SYBR	None
362	P2	vec-n	RGB(176,23,31)			mCTSD	RGB(176,23,31)	UNKNOWN	SYBR	None
363	P3	vec-n	RGB(176,23,31)			mCTSD	RGB(176,23,31)	UNKNOWN	SYBR	None
364	P4	vec-c	RGB(0,0,255)			mCTSD	RGB(176,23,31)	UNKNOWN	SYBR	None
365	P5	vec-c	RGB(0,0,255)			mCTSD	RGB(176,23,31)	UNKNOWN	SYBR	None
366	P6	vec-c	RGB(0,0,255)			mCTSD	RGB(176,23,31)	UNKNOWN	SYBR	None
367	P7	vec-w9	RGB(0,139,69)			mCTSD	RGB(176,23,31)	UNKNOWN	SYBR	None
368	P8	vec-w9	RGB(0,139,69)			mCTSD	RGB(176,23,31)	UNKNOWN	SYBR	None
369	P9	vec-w9	RGB(0,139,69)			mCTSD	RGB(176,23,31)	UNKNOWN	SYBR	None
370	P10	HBx-n	RGB(255,127,0)			mCTSD	RGB(176,23,31)	UNKNOWN	SYBR	None
371	P11	HBx-n	RGB(255,127,0)			mCTSD	RGB(176,23,31)	UNKNOWN	SYBR	None
372	P12	HBx-n	RGB(255,127,0)			mCTSD	RGB(176,23,31)	UNKNOWN	SYBR	None
373	P13	HBx-w	RGB(139,137,112)			mCTSD	RGB(176,23,31)	UNKNOWN	SYBR	None
374	P14	HBx-w	RGB(139,137,112)			mCTSD	RGB(176,23,31)	UNKNOWN	SYBR	None
375	P15	HBx-w	RGB(139,137,112)			mCTSD	RGB(176,23,31)	UNKNOWN	SYBR	None
376	P16	HBx-w10	RGB(238,121,66)			mCTSD	RGB(176,23,31)	UNKNOWN	SYBR	None
377	P17	HBx-w10	RGB(238,121,66)			mCTSD	RGB(176,23,31)	UNKNOWN	SYBR	None
378	P18	HBx-w10	RGB(238,121,66)			mCTSD	RGB(176,23,31)	UNKNOWN	SYBR	None
379	P19
380	P20
381	P21
382	P22
383	P23
384	P24

## Sheet: Amplification Data
Block Type	384-Well Block
Calibration Background is expired	Yes
Calibration Background performed on	10-12-2018 11:47:46 PDT
Calibration FAM is expired	Yes
Calibration FAM performed on	10-23-2018 10:23:19 PDT
Calibration MELTDOCTOR is expired	Yes
Calibration MELTDOCTOR performed on	09-26-2017 21:22:46 PDT
Calibration NED is expired	Yes
Calibration NED performed on	10-23-2018 10:33:14 PDT
Calibration ROI is expired	Yes
Calibration ROI performed on	10-12-2018 09:37:21 PDT
Calibration ROX is expired	Yes
Calibration ROX performed on	10-23-2018 10:07:21 PDT
Calibration SYBR is expired	Yes
Calibration SYBR performed on	10-23-2018 09:57:53 PDT
Calibration TAMRA is expired	Yes
Calibration TAMRA performed on	10-23-2018 10:45:25 PDT
Calibration Uniformity is expired	Yes
Calibration Uniformity performed on	10-12-2018 10:06:59 PDT
Calibration VIC is expired	Yes
Calibration VIC performed on	10-23-2018 10:54:25 PDT
Chemistry	SYBR_GREEN
Date Created	02-03-2021 22:18:31 PST
Experiment File Name	D:\NZZ\2021-02-03 203555.eds
Experiment Name	2021-02-03 203555
Experiment Run End Time	02-03-2021 15:13:12 PST
Experiment Type	Comparative Cт (ΔΔCт)
Instrument Name	285880860
Instrument Serial Number	285880860
Instrument Type	QuantStudio 12K Flex
Passive Reference	ROX
Quantification Cycle Method	Ct
Signal Smoothing On	true
Stage/ Cycle where Analysis is performed	Stage 2, Step 2
Well	Cycle	Target Name	Rn	Delta Rn
1	1	mCYC	0.207988	-0.0038039
1	2	mCYC	0.210231	-0.00348195
1	3	mCYC	0.214348	-0.0012856
1	4	mCYC	0.21725	-0.000304534
1	5	mCYC	0.21984	0.000364681
1	6	mCYC	0.222198	0.000801468
1	7	mCYC	0.224194	0.000875992
1	8	mCYC	0.226534	0.00129514
1	9	mCYC	0.226838	-0.000321979
1	10	mCYC	0.228269	-0.000811791
1	11	mCYC	0.230772	-0.000230166
1	12	mCYC	0.232444	-0.000478922
1	13	mCYC	0.23494	9.57156e-05
1	14	mCYC	0.23963	0.0028647
1	15	mCYC	0.249983	0.0112976
1	16	mCYC	0.266408	0.0258014
1	17	mCYC	0.292438	0.0499102
1	18	mCYC	0.339587	0.095138
1	19	mCYC	0.422546	0.176176
1	20	mCYC	0.559073	0.310782
1	21	mCYC	0.762283	0.512071
1	22	mCYC	1.01988	0.767745
1	23	mCYC	1.29097	1.03691
1	24	mCYC	1.52079	1.26481
1	25	mCYC	1.68378	1.42589
1	26	mCYC	1.80089	1.54107
1	27	mCYC	1.87325	1.61151
1	28	mCYC	1.91403	1.65037
1	29	mCYC	1.93961	1.67403
1	30	mCYC	1.9566	1.6891
1	31	mCYC	1.96767	1.69824
1	32	mCYC	1.97104	1.69969
1	33	mCYC	1.96986	1.6966
1	34	mCYC	1.96961	1.69443
1	35	mCYC	1.96492	1.68781
1	36	mCYC	1.96135	1.68233
1	37	mCYC	1.95675	1.6758
1	38	mCYC	1.95009	1.66722
1	39	mCYC	1.9439	1.65911
1	40	mCYC	1.93978	1.65307
2	1	mCYC	0.163741	0.00185293
2	2	mCYC	0.165121	0.000729098
2	3	mCYC	0.167356	0.000460489
2	4	mCYC	0.169951	0.000552249
2	5	mCYC	0.172657	0.000754412
2	6	mCYC	0.174683	0.00027738
2	7	mCYC	0.176499	-0.000410473
2	8	mCYC	0.178944	-0.000469498
2	9	mCYC	0.181047	-0.000869938
2	10	mCYC	0.183592	-0.00082826
2	11	mCYC	0.185705	-0.00121875
2	12	mCYC	0.187983	-0.00144447
2	13	mCYC	0.192232	0.000301587
2	14	mCYC	0.197329	0.00289527
2	15	mCYC	0.205769	0.00883158
2	16	mCYC	0.220206	0.0207647
2	17	mCYC	0.244819	0.0428743
2	18	mCYC	0.289163	0.0847148
2	19	mCYC	0.36725	0.160298
2	20	mCYC	0.496282	0.286827
2	21	mCYC	0.694035	0.482077
2	22	mCYC	0.9516	0.737138
2	23	mCYC	1.22675	1.00978
2	24	mCYC	1.46653	1.24706
2	25	mCYC	1.64469	1.42272
2	26	mCYC	1.76686	1.54238
2	27	mCYC	1.84601	1.61903
2	28	mCYC	1.88827	1.65878
2	29	mCYC	1.91714	1.68515
2	30	mCYC	1.93813	1.70364
2	31	mCYC	1.94953	1.71253
2	32	mCYC	1.95321	1.71372
2	33	mCYC	1.95031	1.70831
2	34	mCYC	1.95019	1.70568
2	35	mCYC	1.94576	1.69875
2	36	mCYC	1.93982	1.69031
2	37	mCYC	1.93454	1.68252
2	38	mCYC	1.92657	1.67205
2	39	mCYC	1.91903	1.662
2	40	mCYC	1.91127	1.65174
3	1	mCYC	0.161779	0.0011287
3	2	mCYC	0.163248	0.00010622
3	3	mCYC	0.166606	0.000972271
3	4	mCYC	0.169153	0.00102739
3	5	mCYC	0.170963	0.000346115
3	6	mCYC	0.173286	0.0001774
3	7	mCYC	0.175403	-0.00019725
3	8	mCYC	0.177248	-0.000844486
3	9	mCYC	0.179148	-0.00143626
3	10	mCYC	0.181336	-0.0017394
3	11	mCYC	0.184331	-0.00123682
3	12	mCYC	0.187209	-0.000850227
3	13	mCYC	0.191045	0.00049439
3	14	mCYC	0.196329	0.00328688
3	15	mCYC	0.205636	0.0101013
3	16	mCYC	0.220866	0.0228395
3	17	mCYC	0.248947	0.048429
3	18	mCYC	0.297508	0.0944983
3	19	mCYC	0.382323	0.176822
3	20	mCYC	0.522362	0.314369
3	21	mCYC	0.728988	0.518504
3	22	mCYC	0.992627	0.779651
3	23	mCYC	1.26867	1.0532
3	24	mCYC	1.50124	1.28328
3	25	mCYC	1.67238	1.45193
3	26	mCYC	1.78206	1.55911
3	27	mCYC	1.84963	1.62419
3	28	mCYC	1.89661	1.66868
3	29	mCYC	1.92059	1.69017
3	30	mCYC	1.93796	1.70505
3	31	mCYC	1.94843	1.71303
3	32	mCYC	1.95169	1.71379
3	33	mCYC	1.95112	1.71073
3	34	mCYC	1.94733	1.70446
3	35	mCYC	1.94538	1.70001
3	36	mCYC	1.94066	1.6928
3	37	mCYC	1.93483	1.68448
3	38	mCYC	1.92955	1.67671
3	39	mCYC	1.92363	1.6683
3	40	mCYC	1.91978	1.66195
4	1	mCYC	0.152101	0.00299408
4	2	mCYC	0.152756	0.00129077
4	3	mCYC	0.154779	0.000954371
4	4	mCYC	0.156922	0.00073839
4	5	mCYC	0.158619	7.71625e-05
4	6	mCYC	0.160832	-6.91403e-05
4	7	mCYC	0.162922	-0.000337901
4	8	mCYC	0.164473	-0.00114649
4	9	mCYC	0.166668	-0.00131045
4	10	mCYC	0.169573	-0.000763503
4	11	mCYC	0.172108	-0.000587493
4	12	mCYC	0.175199	0.000144582
4	13	mCYC	0.179714	0.00230046
4	14	mCYC	0.187154	0.00738182
4	15	mCYC	0.198505	0.0163734
4	16	mCYC	0.216654	0.0321637
4	17	mCYC	0.248776	0.0619269
4	18	mCYC	0.305327	0.116119
4	19	mCYC	0.403248	0.211681
4	20	mCYC	0.563526	0.3696
4	21	mCYC	0.794036	0.597751
4	22	mCYC	1.06791	0.869263
4	23	mCYC	1.33644	1.13543
4	24	mCYC	1.55381	1.35045
4	25	mCYC	1.70447	1.49875
4	26	mCYC	1.80081	1.59273
4	27	mCYC	1.86237	1.65193
4	28	mCYC	1.90456	1.69177
4	29	mCYC	1.92979	1.71464
4	30	mCYC	1.94736	1.72984
4	31	mCYC	1.95822	1.73835
4	32	mCYC	1.96571	1.74348
4	33	mCYC	1.9676	1.74301
4	34	mCYC	1.96627	1.73932
4	35	mCYC	1.96447	1.73516
4	36	mCYC	1.96151	1.72984
4	37	mCYC	1.95607	1.72204
4	38	mCYC	1.95131	1.71493
4	39	mCYC	1.94934	1.7106
4	40	mCYC	1.94716	1.70605
5	1	mCYC	0.208591	0.00136679
5	2	mCYC	0.209994	0.000278169
5	3	mCYC	0.212727	0.000519058
5	4	mCYC	0.215646	0.000945869
5	5	mCYC	0.218065	0.000873759
5	6	mCYC	0.219222	-0.000461671
5	7	mCYC	0.221256	-0.00091917
5	8	mCYC	0.223759	-0.000908489
5	9	mCYC	0.22657	-0.000589368
5	10	mCYC	0.228506	-0.00114527
5	11	mCYC	0.231406	-0.000737388
5	12	mCYC	0.234499	-0.000136248
5	13	mCYC	0.239686	0.00255892
5	14	mCYC	0.247123	0.00750424
5	15	mCYC	0.259545	0.0174344
5	16	mCYC	0.280734	0.0361313
5	17	mCYC	0.318827	0.0717324
5	18	mCYC	0.384462	0.134876
5	19	mCYC	0.497131	0.245053
5	20	mCYC	0.675303	0.420733
5	21	mCYC	0.923025	0.665963
5	22	mCYC	1.20595	0.946395
5	23	mCYC	1.47064	1.20859
5	24	mCYC	1.67315	1.40861
5	25	mCYC	1.8045	1.53748
5	26	mCYC	1.88806	1.61854
5	27	mCYC	1.94345	1.67144
5	28	mCYC	1.9801	1.7056
5	29	mCYC	2.00271	1.72571
5	30	mCYC	2.01649	1.737
5	31	mCYC	2.02626	1.74428
5	32	mCYC	2.03313	1.74866
5	33	mCYC	2.03315	1.74619
5	34	mCYC	2.0355	1.74604
5	35	mCYC	2.03232	1.74037
5	36	mCYC	2.02838	1.73394
5	37	mCYC	2.02285	1.72592
5	38	mCYC	2.01618	1.71676
5	39	mCYC	2.01086	1.70895
5	40	mCYC	2.00801	1.7036
6	1	mCYC	0.0830765	0.00473224
6	2	mCYC	0.0832926	0.00267939
6	3	mCYC	0.084476	0.00159392
6	4	mCYC	0.0857819	0.000630795
6	5	mCYC	0.0877092	0.000289198
6	6	mCYC	0.0894049	-0.000284148
6	7	mCYC	0.0912601	-0.000697867
6	8	mCYC	0.0926598	-0.00156708
6	9	mCYC	0.0950287	-0.00146714
6	10	mCYC	0.0975161	-0.00124875
6	11	mCYC	0.100545	-0.000488298
6	12	mCYC	0.103976	0.000673126
6	13	mCYC	0.108138	0.00256625
6	14	mCYC	0.115292	0.00745106
6	15	mCYC	0.126957	0.0168469
6	16	mCYC	0.145727	0.0333484
6	17	mCYC	0.179801	0.0651539
6	18	mCYC	0.240936	0.124019
6	19	mCYC	0.345796	0.22661
6	20	mCYC	0.513947	0.392492
6	21	mCYC	0.751173	0.62745
6	22	mCYC	1.03281	0.906813
6	23	mCYC	1.3035	1.17524
6	24	mCYC	1.52167	1.39114
6	25	mCYC	1.67034	1.53754
6	26	mCYC	1.76754	1.63247
6	27	mCYC	1.82659	1.68926
6	28	mCYC	1.86699	1.72739
6	29	mCYC	1.89397	1.7521
6	30	mCYC	1.9122	1.76805
6	31	mCYC	1.9199	1.77349
6	32	mCYC	1.92794	1.77926
6	33	mCYC	1.93262	1.78167
6	34	mCYC	1.93397	1.78075
6	35	mCYC	1.92965	1.77416
6	36	mCYC	1.92823	1.77047
6	37	mCYC	1.92469	1.76467
6	38	mCYC	1.92096	1.75866
6	39	mCYC	1.91752	1.75295
6	40	mCYC	1.91325	1.74642
7	1	mCYC	0.129696	0.00523668
7	2	mCYC	0.130122	0.00316518
7	3	mCYC	0.131514	0.00205811
7	4	mCYC	0.132941	0.000987551
7	5	mCYC	0.134509	5.69272e-05
7	6	mCYC	0.13649	-0.000460756
7	7	mCYC	0.138254	-0.00119498
7	8	mCYC	0.140184	-0.001763
7	9	mCYC	0.142961	-0.00148401
7	10	mCYC	0.145625	-0.00131886
7	11	mCYC	0.148781	-0.000660293
7	12	mCYC	0.152439	0.000498911
7	13	mCYC	0.157719	0.0032804
7	14	mCYC	0.166152	0.00921528
7	15	mCYC	0.179517	0.0200824
7	16	mCYC	0.203686	0.0417525
7	17	mCYC	0.245535	0.0811032
7	18	mCYC	0.318683	0.151753
7	19	mCYC	0.443938	0.27451
7	20	mCYC	0.637469	0.465543
7	21	mCYC	0.897029	0.722605
7	22	mCYC	1.1826	1.00568
7	23	mCYC	1.43526	1.25584
7	24	mCYC	1.62603	1.44411
7	25	mCYC	1.74856	1.56415
7	26	mCYC	1.82259	1.63567
7	27	mCYC	1.86536	1.67595
7	28	mCYC	1.88863	1.69672
7	29	mCYC	1.89848	1.70407
7	30	mCYC	1.90324	1.70633
7	31	mCYC	1.90725	1.70784
7	32	mCYC	1.90865	1.70674
7	33	mCYC	1.90415	1.69975
7	34	mCYC	1.90043	1.69352
7	35	mCYC	1.8933	1.6839
7	36	mCYC	1.88925	1.67735
7	37	mCYC	1.888	1.6736
7	38	mCYC	1.88393	1.66704
7	39	mCYC	1.87496	1.65557
7	40	mCYC	1.87045	1.64856
8	1	mCYC	0.10724	0.00276542
8	2	mCYC	0.108341	0.00148979
8	3	mCYC	0.109978	0.0007498
8	4	mCYC	0.11185	0.000245565
8	5	mCYC	0.114299	0.000318319
8	6	mCYC	0.11639	3.28109e-05
8	7	mCYC	0.118226	-0.000507365
8	8	mCYC	0.119859	-0.00125087
8	9	mCYC	0.12259	-0.000896177
8	10	mCYC	0.125363	-0.000499666
8	11	mCYC	0.128329	9.03442e-05
8	12	mCYC	0.132333	0.00171724
8	13	mCYC	0.138629	0.0056376
8	14	mCYC	0.147929	0.0125605
8	15	mCYC	0.16352	0.0257751
8	16	mCYC	0.190974	0.0508531
8	17	mCYC	0.23884	0.0963429
8	18	mCYC	0.322812	0.177938
8	19	mCYC	0.462622	0.315372
8	20	mCYC	0.67228	0.522653
8	21	mCYC	0.939893	0.78789
8	22	mCYC	1.22379	1.06941
8	23	mCYC	1.46394	1.30719
8	24	mCYC	1.63176	1.47263
8	25	mCYC	1.73779	1.57628
8	26	mCYC	1.80099	1.6371
8	27	mCYC	1.83808	1.67182
8	28	mCYC	1.85835	1.68971
8	29	mCYC	1.8689	1.69788
8	30	mCYC	1.87122	1.69783
8	31	mCYC	1.86937	1.69361
8	32	mCYC	1.87124	1.6931
8	33	mCYC	1.86926	1.68874
8	34	mCYC	1.86531	1.68241
8	35	mCYC	1.85902	1.67375
8	36	mCYC	1.85538	1.66773
8	37	mCYC	1.84998	1.65996
8	38	mCYC	1.84575	1.65335
8	39	mCYC	1.84115	1.64637
8	40	mCYC	1.83568	1.63852
9	1	mCYC	0.0697714	0.00265846
9	2	mCYC	0.0707658	0.00130121
9	3	mCYC	0.0723889	0.000572662
9	4	mCYC	0.074604	0.000436157
9	5	mCYC	0.076529	9.48924e-06
9	6	mCYC	0.0784948	-0.000376409
9	7	mCYC	0.0808993	-0.00032355
9	8	mCYC	0.0831367	-0.000437762
9	9	mCYC	0.0851779	-0.000748201
9	10	mCYC	0.0879166	-0.000361154
9	11	mCYC	0.090514	-0.000115474
9	12	mCYC	0.0943253	0.00134424
9	13	mCYC	0.100322	0.00498941
9	14	mCYC	0.10982	0.0121358
9	15	mCYC	0.118803	0.0187665
9	16	mCYC	0.139267	0.0368789
9	17	mCYC	0.17705	0.0723103
9	18	mCYC	0.245025	0.137934
9	19	mCYC	0.360626	0.251183
9	20	mCYC	0.543277	0.431483
9	21	mCYC	0.79568	0.681534
9	22	mCYC	1.08437	0.967873
9	23	mCYC	1.35301	1.23416
9	24	mCYC	1.56021	1.43901
9	25	mCYC	1.69871	1.57516
9	26	mCYC	1.78545	1.65955
9	27	mCYC	1.83382	1.70557
9	28	mCYC	1.86382	1.73321
9	29	mCYC	1.88048	1.74752
9	30	mCYC	1.88924	1.75392
9	31	mCYC	1.89351	1.75585
9	32	mCYC	1.89246	1.75245
9	33	mCYC	1.8919	1.74954
9	34	mCYC	1.88704	1.74233
9	35	mCYC	1.88359	1.73652
9	36	mCYC	1.87714	1.72772
9	37	mCYC	1.87066	1.71889
9	38	mCYC	1.86788	1.71375
9	39	mCYC	1.86056	1.70409
9	40	mCYC	1.85721	1.69838
10	1	mCYC	-0.0503029	0.00299237
10	2	mCYC	-0.0489948	0.00172808
10	3	mCYC	-0.0463338	0.00181669
10	4	mCYC	-0.0446355	0.000942506
10	5	mCYC	-0.0428955	0.000110169
10	6	mCYC	-0.041072	-0.000638729
10	7	mCYC	-0.038722	-0.000861229
10	8	mCYC	-0.0367597	-0.0014713
10	9	mCYC	-0.0344071	-0.00169112
10	10	mCYC	-0.0312246	-0.00108108
10	11	mCYC	-0.0280607	-0.00048954
10	12	mCYC	-0.0245478	0.000450942
10	13	mCYC	-0.0195136	0.00291269
10	14	mCYC	-0.0116151	0.00823881
10	15	mCYC	0.00116111	0.0184426
10	16	mCYC	0.0231486	0.0378577
10	17	mCYC	0.0627059	0.0748426
10	18	mCYC	0.131496	0.141061
10	19	mCYC	0.248745	0.255737
10	20	mCYC	0.43381	0.43823
10	21	mCYC	0.688356	0.690203
10	22	mCYC	0.981425	0.9807
10	23	mCYC	1.25126	1.24796
10	24	mCYC	1.45371	1.44784
10	25	mCYC	1.59343	1.58498
10	26	mCYC	1.67922	1.6682
10	27	mCYC	1.73125	1.71766
10	28	mCYC	1.76464	1.74848
10	29	mCYC	1.78684	1.76811
10	30	mCYC	1.80012	1.77881
10	31	mCYC	1.80526	1.78138
10	32	mCYC	1.80864	1.78219
10	33	mCYC	1.81045	1.78143
10	34	mCYC	1.80656	1.77497
10	35	mCYC	1.80021	1.76604
10	36	mCYC	1.79411	1.75737
10	37	mCYC	1.78952	1.75021
10	38	mCYC	1.78212	1.74024
10	39	mCYC	1.77739	1.73293
10	40	mCYC	1.77377	1.72674
11	1	mCYC	0.109337	0.0033735
11	2	mCYC	0.110288	0.00169939
11	3	mCYC	0.112344	0.00112964
11	4	mCYC	0.114615	0.000775829
11	5	mCYC	0.116722	0.000256535
11	6	mCYC	0.118993	-9.80053e-05
11	7	mCYC	0.121131	-0.000585263
11	8	mCYC	0.123106	-0.00123585
11	9	mCYC	0.125544	-0.00142277
11	10	mCYC	0.128333	-0.00125933
11	11	mCYC	0.131676	-0.000541746
11	12	mCYC	0.135442	0.000598286
11	13	mCYC	0.139852	0.00238267
11	14	mCYC	0.14704	0.00694553
11	15	mCYC	0.159026	0.0163058
11	16	mCYC	0.179188	0.0338426
11	17	mCYC	0.213965	0.0659942
11	18	mCYC	0.277065	0.126469
11	19	mCYC	0.38841	0.235189
11	20	mCYC	0.553931	0.398084
11	21	mCYC	0.794408	0.635935
11	22	mCYC	1.08006	0.918958
11	23	mCYC	1.35653	1.1928
11	24	mCYC	1.5717	1.40535
11	25	mCYC	1.71838	1.54941
11	26	mCYC	1.81278	1.64118
11	27	mCYC	1.87246	1.69823
11	28	mCYC	1.91129	1.73444
11	29	mCYC	1.93686	1.75738
11	30	mCYC	1.94565	1.76355
11	31	mCYC	1.95461	1.76988
11	32	mCYC	1.95459	1.76723
11	33	mCYC	1.95294	1.76296
11	34	mCYC	1.94774	1.75514
11	35	mCYC	1.94083	1.7456
11	36	mCYC	1.93556	1.73771
11	37	mCYC	1.93225	1.73177
11	38	mCYC	1.92633	1.72322
11	39	mCYC	1.91827	1.71254
11	40	mCYC	1.91163	1.70327
12	1	mCYC	0.0854593	0.00345309
12	2	mCYC	0.0863913	0.00217457
12	3	mCYC	0.0879928	0.00156559
12	4	mCYC	0.0893602	0.000722469
12	5	mCYC	0.0911169	0.000268719
12	6	mCYC	0.0926223	-0.000436481
12	7	mCYC	0.0944955	-0.000773682
12	8	mCYC	0.0966621	-0.000817673
12	9	mCYC	0.0982655	-0.00142473
12	10	mCYC	0.100253	-0.00164818
12	11	mCYC	0.103031	-0.00108002
12	12	mCYC	0.106603	0.000281397
12	13	mCYC	0.111875	0.00334258
12	14	mCYC	0.119301	0.00855861
12	15	mCYC	0.132375	0.0194222
12	16	mCYC	0.15473	0.0395663
12	17	mCYC	0.194539	0.077165
12	18	mCYC	0.264875	0.14529
12	19	mCYC	0.383291	0.261496
12	20	mCYC	0.567041	0.443035
12	21	mCYC	0.81566	0.689444
12	22	mCYC	1.09065	0.962221
12	23	mCYC	1.3411	1.21046
12	24	mCYC	1.52747	1.39462
12	25	mCYC	1.6497	1.51464
12	26	mCYC	1.7267	1.58943
12	27	mCYC	1.77463	1.63516
12	28	mCYC	1.80572	1.66403
12	29	mCYC	1.82091	1.67701
12	30	mCYC	1.83146	1.68535
12	31	mCYC	1.83757	1.68925
12	32	mCYC	1.84084	1.69031
12	33	mCYC	1.84039	1.68765
12	34	mCYC	1.83875	1.68379
12	35	mCYC	1.83291	1.67574
12	36	mCYC	1.82593	1.66655
12	37	mCYC	1.81844	1.65685
12	38	mCYC	1.81441	1.65061
12	39	mCYC	1.80805	1.64205
12	40	mCYC	1.8	1.63178
13	1	mCYC	0.109692	0.00458334
13	2	mCYC	0.110301	0.00283037
13	3	mCYC	0.111596	0.00176457
13	4	mCYC	0.113168	0.000975325
13	5	mCYC	0.11468	0.000126081
13	6	mCYC	0.116401	-0.000513676
13	7	mCYC	0.118183	-0.00109327
13	8	mCYC	0.120557	-0.00108044
13	9	mCYC	0.12286	-0.00113826
13	10	mCYC	0.125412	-0.00094717
13	11	mCYC	0.127894	-0.000827064
13	12	mCYC	0.130705	-0.000377106
13	13	mCYC	0.134105	0.000662059
13	14	mCYC	0.138253	0.00244895
13	15	mCYC	0.144262	0.00609713
13	16	mCYC	0.154422	0.0138959
13	17	mCYC	0.170966	0.0280787
13	18	mCYC	0.199084	0.0538354
13	19	mCYC	0.248868	0.101258
13	20	mCYC	0.337266	0.187295
13	21	mCYC	0.481651	0.329319
13	22	mCYC	0.703961	0.549267
13	23	mCYC	1.00818	0.851123
13	24	mCYC	1.26481	1.1054
13	25	mCYC	1.49596	1.33419
13	26	mCYC	1.67123	1.50709
13	27	mCYC	1.78578	1.61928
13	28	mCYC	1.85351	1.68465
13	29	mCYC	1.89626	1.72504
13	30	mCYC	1.91645	1.74287
13	31	mCYC	1.92718	1.75123
13	32	mCYC	1.92911	1.7508
13	33	mCYC	1.92763	1.74697
13	34	mCYC	1.92712	1.74409
13	35	mCYC	1.92324	1.73786
13	36	mCYC	1.91604	1.72829
13	37	mCYC	1.90986	1.71975
13	38	mCYC	1.90445	1.71197
13	39	mCYC	1.90157	1.70674
13	40	mCYC	1.89718	1.69999
14	1	mCYC	0.112686	0.00265582
14	2	mCYC	0.113859	0.00130102
14	3	mCYC	0.116198	0.00111276
14	4	mCYC	0.118312	0.000698218
14	5	mCYC	0.120239	9.77349e-05
14	6	mCYC	0.122763	9.32163e-05
14	7	mCYC	0.124938	-0.000259371
14	8	mCYC	0.127149	-0.000575749
14	9	mCYC	0.129044	-0.0012094
14	10	mCYC	0.13171	-0.00107098
14	11	mCYC	0.134067	-0.0012421
14	12	mCYC	0.136879	-0.000957307
14	13	mCYC	0.140759	0.000394009
14	14	mCYC	0.145812	0.00291897
14	15	mCYC	0.152706	0.00728554
14	16	mCYC	0.163548	0.0155995
14	17	mCYC	0.182277	0.0318007
14	18	mCYC	0.215057	0.0620532
14	19	mCYC	0.271475	0.115943
14	20	mCYC	0.369464	0.211404
14	21	mCYC	0.52973	0.369142
14	22	mCYC	0.762163	0.599047
14	23	mCYC	1.04863	0.882982
14	24	mCYC	1.33368	1.16551
14	25	mCYC	1.55955	1.38885
14	26	mCYC	1.71681	1.54359
14	27	mCYC	1.81316	1.6374
14	28	mCYC	1.87041	1.69212
14	29	mCYC	1.90417	1.72335
14	30	mCYC	1.91987	1.73654
14	31	mCYC	1.92712	1.74126
14	32	mCYC	1.92786	1.73946
14	33	mCYC	1.92548	1.73456
14	34	mCYC	1.92398	1.73053
14	35	mCYC	1.91705	1.72107
14	36	mCYC	1.90984	1.71133
14	37	mCYC	1.90505	1.70402
14	38	mCYC	1.90115	1.69759
14	39	mCYC	1.89512	1.68903
14	40	mCYC	1.88862	1.68
15	1	mCYC	0.128542	0.00264035
15	2	mCYC	0.129794	0.00132256
15	3	mCYC	0.13223	0.00118924
15	4	mCYC	0.134275	0.000664626
15	5	mCYC	0.136508	0.000327498
15	6	mCYC	0.138828	7.82725e-05
15	7	mCYC	0.140748	-0.000571824
15	8	mCYC	0.142802	-0.00108733
15	9	mCYC	0.145462	-0.000997066
15	10	mCYC	0.147939	-0.00108984
15	11	mCYC	0.150809	-0.000790111
15	12	mCYC	0.153534	-0.000634815
15	13	mCYC	0.156948	0.000209884
15	14	mCYC	0.16201	0.00270147
15	15	mCYC	0.168436	0.00655829
15	16	mCYC	0.178844	0.0143966
15	17	mCYC	0.196464	0.0294462
15	18	mCYC	0.227084	0.057497
15	19	mCYC	0.281437	0.10928
15	20	mCYC	0.37604	0.201313
15	21	mCYC	0.530959	0.353662
15	22	mCYC	0.757942	0.578075
15	23	mCYC	1.04042	0.857984
15	24	mCYC	1.3268	1.1418
15	25	mCYC	1.55473	1.36716
15	26	mCYC	1.71661	1.52647
15	27	mCYC	1.81299	1.62027
15	28	mCYC	1.87049	1.67521
15	29	mCYC	1.90202	1.70416
15	30	mCYC	1.92333	1.72291
15	31	mCYC	1.93456	1.73156
15	32	mCYC	1.938	1.73243
15	33	mCYC	1.93414	1.72601
15	34	mCYC	1.92888	1.71817
15	35	mCYC	1.92548	1.71221
15	36	mCYC	1.91996	1.70412
15	37	mCYC	1.91314	1.69473
15	38	mCYC	1.90959	1.68861
15	39	mCYC	1.90826	1.68471
15	40	mCYC	1.903	1.67688
16	1	mCYC	0.114297	0.00357121
16	2	mCYC	0.11515	0.00157523
16	3	mCYC	0.117777	0.00135393
16	4	mCYC	0.120581	0.00130895
16	5	mCYC	0.122751	0.000630168
16	6	mCYC	0.124564	-0.000405537
16	7	mCYC	0.1263	-0.00151795
16	8	mCYC	0.129164	-0.00150296
16	9	mCYC	0.132385	-0.00113054
16	10	mCYC	0.135026	-0.00133864
16	11	mCYC	0.1378	-0.0014131
16	12	mCYC	0.142526	0.000464279
16	13	mCYC	0.148462	0.00355139
16	14	mCYC	0.157227	0.00946798
16	15	mCYC	0.171861	0.0212538
16	16	mCYC	0.196315	0.0428587
16	17	mCYC	0.240173	0.0838683
16	18	mCYC	0.317494	0.158341
16	19	mCYC	0.448277	0.286275
16	20	mCYC	0.649735	0.484884
16	21	mCYC	0.920967	0.753267
16	22	mCYC	1.21857	1.04802
16	23	mCYC	1.48204	1.30864
16	24	mCYC	1.6771	1.50085
16	25	mCYC	1.80164	1.62255
16	26	mCYC	1.87523	1.69329
16	27	mCYC	1.91937	1.73458
16	28	mCYC	1.94313	1.75549
16	29	mCYC	1.95651	1.76602
16	30	mCYC	1.96487	1.77153
16	31	mCYC	1.96347	1.76728
16	32	mCYC	1.96085	1.76182
16	33	mCYC	1.95629	1.75441
16	34	mCYC	1.9506	1.74587
16	35	mCYC	1.94357	1.73599
16	36	mCYC	1.93527	1.72484
16	37	mCYC	1.9286	1.71532
16	38	mCYC	1.92379	1.70767
16	39	mCYC	1.91923	1.70025
16	40	mCYC	1.91731	1.69548
17	1	mCYC	0.125103	0.00199022
17	2	mCYC	0.126604	0.000620327
17	3	mCYC	0.130366	0.00151146
17	4	mCYC	0.132818	0.00109257
17	5	mCYC	0.13479	0.000193642
17	6	mCYC	0.136885	-0.000581752
17	7	mCYC	0.139569	-0.000768624
17	8	mCYC	0.142136	-0.0010729
17	9	mCYC	0.144534	-0.00154607
17	10	mCYC	0.147283	-0.001668
17	11	mCYC	0.15091	-0.000911886
17	12	mCYC	0.155256	0.000563704
17	13	mCYC	0.160751	0.00318786
17	14	mCYC	0.168863	0.00842917
17	15	mCYC	0.183674	0.0203689
17	16	mCYC	0.208296	0.0421196
17	17	mCYC	0.250305	0.0812586
17	18	mCYC	0.325929	0.154011
17	19	mCYC	0.453316	0.278528
17	20	mCYC	0.65093	0.47327
17	21	mCYC	0.918805	0.738274
17	22	mCYC	1.21736	1.03396
17	23	mCYC	1.48491	1.29864
17	24	mCYC	1.68168	1.49254
17	25	mCYC	1.81024	1.61822
17	26	mCYC	1.89113	1.69625
17	27	mCYC	1.93732	1.73956
17	28	mCYC	1.96027	1.75964
17	29	mCYC	1.97229	1.76879
17	30	mCYC	1.979	1.77263
17	31	mCYC	1.98023	1.77099
17	32	mCYC	1.9767	1.76459
17	33	mCYC	1.96976	1.75478
17	34	mCYC	1.96322	1.74537
17	35	mCYC	1.9599	1.73918
17	36	mCYC	1.95421	1.73061
17	37	mCYC	1.95029	1.72383
17	38	mCYC	1.94599	1.71665
17	39	mCYC	1.94045	1.70825
17	40	mCYC	1.93806	1.70299
18	1	mCYC	0.155656	0.00258334
18	2	mCYC	0.157309	0.00132087
18	3	mCYC	0.15996	0.00105808
18	4	mCYC	0.162677	0.000860239
18	5	mCYC	0.165242	0.00050984
18	6	mCYC	0.167321	-0.00032571
18	7	mCYC	0.169618	-0.000943286
18	8	mCYC	0.172582	-0.000893976
18	9	mCYC	0.17538	-0.00101037
18	10	mCYC	0.177999	-0.00130617
18	11	mCYC	0.180984	-0.00123619
18	12	mCYC	0.185575	0.000440253
18	13	mCYC	0.190896	0.00284728
18	14	mCYC	0.199556	0.00859183
18	15	mCYC	0.214048	0.0201696
18	16	mCYC	0.23901	0.0422169
18	17	mCYC	0.283141	0.0834329
18	18	mCYC	0.360402	0.157779
18	19	mCYC	0.490443	0.284906
18	20	mCYC	0.692178	0.483726
18	21	mCYC	0.961511	0.750145
18	22	mCYC	1.25969	1.04541
18	23	mCYC	1.52282	1.30562
18	24	mCYC	1.7167	1.49659
18	25	mCYC	1.8408	1.61778
18	26	mCYC	1.91881	1.69287
18	27	mCYC	1.96329	1.73444
18	28	mCYC	1.98603	1.75426
18	29	mCYC	1.99882	1.76414
18	30	mCYC	2.00589	1.76829
18	31	mCYC	2.0073	1.76679
18	32	mCYC	2.00403	1.76061
18	33	mCYC	1.99725	1.75091
18	34	mCYC	1.99284	1.74358
18	35	mCYC	1.98704	1.73487
18	36	mCYC	1.97856	1.72348
18	37	mCYC	1.97287	1.71487
18	38	mCYC	1.96915	1.70823
18	39	mCYC	1.96249	1.69866
18	40	mCYC	1.95712	1.69038
19	1	mCYC	0.133803	0.00206738
19	2	mCYC	0.135122	0.000471101
19	3	mCYC	0.138028	0.000461796
19	4	mCYC	0.141131	0.000649558
19	5	mCYC	0.143823	0.000425974
19	6	mCYC	0.146598	0.000285569
19	7	mCYC	0.14875	-0.000478406
19	8	mCYC	0.1517	-0.000443454
19	9	mCYC	0.153714	-0.00134504
19	10	mCYC	0.156799	-0.00117582
19	11	mCYC	0.159831	-0.0010586
19	12	mCYC	0.164047	0.000241748
19	13	mCYC	0.169157	0.00243667
19	14	mCYC	0.176511	0.00687472
19	15	mCYC	0.187938	0.0153861
19	16	mCYC	0.207301	0.0318336
19	17	mCYC	0.241346	0.0629632
19	18	mCYC	0.301572	0.120275
19	19	mCYC	0.405259	0.221046
19	20	mCYC	0.572145	0.385017
19	21	mCYC	0.811201	0.621157
19	22	mCYC	1.1008	0.907844
19	23	mCYC	1.38277	1.18689
19	24	mCYC	1.60357	1.40478
19	25	mCYC	1.754	1.5523
19	26	mCYC	1.84306	1.63844
19	27	mCYC	1.89981	1.69228
19	28	mCYC	1.93327	1.72282
19	29	mCYC	1.95308	1.73972
19	30	mCYC	1.96557	1.74929
19	31	mCYC	1.97098	1.75178
19	32	mCYC	1.97308	1.75097
19	33	mCYC	1.97121	1.74618
19	34	mCYC	1.97182	1.74388
19	35	mCYC	1.96613	1.73527
19	36	mCYC	1.9583	1.72452
19	37	mCYC	1.9521	1.7154
19	38	mCYC	1.94848	1.70887
19	39	mCYC	1.94039	1.69787
19	40	mCYC	1.93866	1.69322
20	1	mCYC	0.177534	-0.000640837
20	2	mCYC	0.18013	-0.00123337
20	3	mCYC	0.184907	0.000355147
20	4	mCYC	0.188424	0.000684294
20	5	mCYC	0.191388	0.000459565
20	6	mCYC	0.194309	0.00019265
20	7	mCYC	0.197033	-0.000271555
20	8	mCYC	0.199798	-0.000695453
20	9	mCYC	0.202333	-0.00134819
20	10	mCYC	0.205802	-0.0010676
20	11	mCYC	0.20942	-0.000638396
20	12	mCYC	0.21349	0.000243778
20	13	mCYC	0.218521	0.00208576
20	14	mCYC	0.225539	0.00591588
20	15	mCYC	0.236916	0.0141047
20	16	mCYC	0.256649	0.0306486
20	17	mCYC	0.289463	0.0602747
20	18	mCYC	0.347984	0.115607
20	19	mCYC	0.448657	0.213092
20	20	mCYC	0.610389	0.371636
20	21	mCYC	0.844607	0.602666
20	22	mCYC	1.13081	0.885677
20	23	mCYC	1.40968	1.16136
20	24	mCYC	1.62656	1.37505
20	25	mCYC	1.77922	1.52452
20	26	mCYC	1.87204	1.61416
20	27	mCYC	1.92341	1.66233
20	28	mCYC	1.95832	1.69406
20	29	mCYC	1.98164	1.71419
20	30	mCYC	1.99357	1.72294
20	31	mCYC	2.00051	1.72669
20	32	mCYC	1.99933	1.72232
20	33	mCYC	1.99987	1.71967
20	34	mCYC	2.00299	1.7196
20	35	mCYC	1.9985	1.71192
20	36	mCYC	1.98638	1.69661
20	37	mCYC	1.98037	1.68741
20	38	mCYC	1.97897	1.68282
20	39	mCYC	1.97366	1.67433
20	40	mCYC	1.96764	1.66512
21	1	mCYC	0.123555	0.00264853
21	2	mCYC	0.125294	0.00150595
21	3	mCYC	0.127898	0.00122924
21	4	mCYC	0.130254	0.000704302
21	5	mCYC	0.132522	9.15766e-05
21	6	mCYC	0.135224	-8.75397e-05
21	7	mCYC	0.137498	-0.000694215
21	8	mCYC	0.1402	-0.00087357
21	9	mCYC	0.142756	-0.00119775
21	10	mCYC	0.145584	-0.00125135
21	11	mCYC	0.148705	-0.00101087
21	12	mCYC	0.152946	0.000348934
21	13	mCYC	0.158219	0.00274124
21	14	mCYC	0.1651	0.00674081
21	15	mCYC	0.176087	0.0148476
21	16	mCYC	0.195461	0.03134
21	17	mCYC	0.227811	0.0608095
21	18	mCYC	0.284986	0.115104
21	19	mCYC	0.384287	0.211524
21	20	mCYC	0.54645	0.370806
21	21	mCYC	0.779018	0.600493
21	22	mCYC	1.06334	0.881934
21	23	mCYC	1.34359	1.1593
21	24	mCYC	1.56437	1.3772
21	25	mCYC	1.71632	1.52627
21	26	mCYC	1.80938	1.61645
21	27	mCYC	1.86214	1.66633
21	28	mCYC	1.89512	1.69643
21	29	mCYC	1.91663	1.71506
21	30	mCYC	1.92979	1.72534
21	31	mCYC	1.93844	1.7311
21	32	mCYC	1.94086	1.73065
21	33	mCYC	1.93932	1.72622
21	34	mCYC	1.93665	1.72067
21	35	mCYC	1.92895	1.71009
21	36	mCYC	1.9247	1.70296
21	37	mCYC	1.91704	1.69242
21	38	mCYC	1.90857	1.68107
21	39	mCYC	1.90605	1.67566
21	40	mCYC	1.90481	1.67155
22	1	mTAT	0.067161	-0.00296979
22	2	mTAT	0.068763	-0.00264384
22	3	mTAT	0.0718493	-0.00083368
22	4	mTAT	0.0746165	0.00065748
22	5	mTAT	0.0762755	0.00104039
22	6	mTAT	0.0770168	0.000505653
22	7	mTAT	0.0782359	0.000448665
22	8	mTAT	0.0789771	-8.61817e-05
22	9	mTAT	0.0800406	-0.000298768
22	10	mTAT	0.0809232	-0.000692292
22	11	mTAT	0.0819513	-0.000940194
22	12	mTAT	0.0830626	-0.00110496
22	13	mTAT	0.0842069	-0.00123679
22	14	mTAT	0.0863542	-0.000365596
22	15	mTAT	0.0909021	0.00290628
22	16	mTAT	0.0979078	0.00863585
22	17	mTAT	0.11168	0.0211321
22	18	mTAT	0.138224	0.0463997
22	19	mTAT	0.187481	0.0943806
22	20	mTAT	0.277394	0.183017
22	21	mTAT	0.429355	0.333703
22	22	mTAT	0.657551	0.560623
22	23	mTAT	0.945226	0.847022
22	24	mTAT	1.22983	1.13034
22	25	mTAT	1.44498	1.34422
22	26	mTAT	1.57986	1.47783
22	27	mTAT	1.67262	1.56931
22	28	mTAT	1.74492	1.64034
22	29	mTAT	1.79947	1.69361
22	30	mTAT	1.84027	1.73313
22	31	mTAT	1.87085	1.76244
22	32	mTAT	1.89145	1.78176
22	33	mTAT	1.90989	1.79892
22	34	mTAT	1.92297	1.81072
22	35	mTAT	1.93184	1.81832
22	36	mTAT	1.94328	1.82849
22	37	mTAT	1.95194	1.83587
22	38	mTAT	1.95956	1.84221
22	39	mTAT	1.9684	1.84978
22	40	mTAT	1.96721	1.84731
23	1	mTAT	0.0924826	-0.00604452
23	2	mTAT	0.0949819	-0.00503464
23	3	mTAT	0.0996906	-0.00181529
23	4	mTAT	0.102832	-0.00016308
23	5	mTAT	0.105279	0.000794123
23	6	mTAT	0.106672	0.000697798
23	7	mTAT	0.108668	0.00120481
23	8	mTAT	0.109993	0.00103994
23	9	mTAT	0.110509	6.71091e-05
23	10	mTAT	0.111722	-0.000209922
23	11	mTAT	0.112868	-0.000552496
23	12	mTAT	0.114306	-0.000604334
23	13	mTAT	0.115344	-0.00105546
23	14	mTAT	0.117108	-0.000781233
23	15	mTAT	0.120757	0.00137804
23	16	mTAT	0.12767	0.00680215
23	17	mTAT	0.140004	0.0176465
23	18	mTAT	0.163349	0.0395019
23	19	mTAT	0.207725	0.0823886
23	20	mTAT	0.287264	0.160439
23	21	mTAT	0.423684	0.295369
23	22	mTAT	0.628038	0.498234
23	23	mTAT	0.886085	0.754791
23	24	mTAT	1.1442	1.01141
23	25	mTAT	1.34112	1.20685
23	26	mTAT	1.46591	1.33015
23	27	mTAT	1.55035	1.4131
23	28	mTAT	1.61417	1.47543
23	29	mTAT	1.66235	1.52212
23	30	mTAT	1.69721	1.55549
23	31	mTAT	1.72445	1.58124
23	32	mTAT	1.74623	1.60153
23	33	mTAT	1.76404	1.61786
23	34	mTAT	1.77913	1.63145
23	35	mTAT	1.79161	1.64245
23	36	mTAT	1.80095	1.65029
23	37	mTAT	1.80575	1.65361
23	38	mTAT	1.81086	1.65722
23	39	mTAT	1.81512	1.66
23	40	mTAT	1.81789	1.66128
24	1	mTAT	0.0500633	-0.00375954
24	2	mTAT	0.0528723	-0.00224348
24	3	mTAT	0.0562074	-0.000201423
24	4	mTAT	0.0580257	0.000323791
24	5	mTAT	0.0599559	0.000961053
24	6	mTAT	0.0605531	0.000265228
24	7	mTAT	0.0621411	0.000560177
24	8	mTAT	0.062944	7.00433e-05
24	9	mTAT	0.063749	-0.000417944
24	10	mTAT	0.0644553	-0.00100471
24	11	mTAT	0.0652566	-0.00149639
24	12	mTAT	0.0668443	-0.00120171
24	13	mTAT	0.0686332	-0.000705852
24	14	mTAT	0.0710518	0.00041968
24	15	mTAT	0.0743532	0.00242805
24	16	mTAT	0.0813905	0.00817237
24	17	mTAT	0.0953923	0.0208811
24	18	mTAT	0.120671	0.0448666
24	19	mTAT	0.168717	0.0916196
24	20	mTAT	0.256154	0.177764
24	21	mTAT	0.40408	0.324397
24	22	mTAT	0.627304	0.546328
24	23	mTAT	0.907342	0.825073
24	24	mTAT	1.18611	1.10255
24	25	mTAT	1.39641	1.31155
24	26	mTAT	1.52914	1.44299
24	27	mTAT	1.62326	1.53582
24	28	mTAT	1.69412	1.60539
24	29	mTAT	1.74496	1.65494
24	30	mTAT	1.78454	1.69322
24	31	mTAT	1.81597	1.72336
24	32	mTAT	1.8332	1.73929
24	33	mTAT	1.85101	1.75581
24	34	mTAT	1.8646	1.76811
24	35	mTAT	1.87678	1.77899
24	36	mTAT	1.88413	1.78505
24	37	mTAT	1.8925	1.79213
24	38	mTAT	1.89709	1.79543
24	39	mTAT	1.90444	1.80148
24	40	mTAT	1.90945	1.80519
25	1	mALDOB	0.309644	-0.00455864
25	2	mALDOB	0.311228	-0.00470715
25	3	mALDOB	0.315907	-0.0017615
25	4	mALDOB	0.319184	-0.00021701
25	5	mALDOB	0.321995	0.000860422
25	6	mALDOB	0.323744	0.000877219
25	7	mALDOB	0.325805	0.00120521
25	8	mALDOB	0.32774	0.00140646
25	9	mALDOB	0.328145	7.92574e-05
25	10	mALDOB	0.328385	-0.001414
25	11	mALDOB	0.330344	-0.00118817
25	12	mALDOB	0.331847	-0.00141802
25	13	mALDOB	0.336568	0.00157013
25	14	mALDOB	0.34595	0.00921874
25	15	mALDOB	0.362911	0.0244466
25	16	mALDOB	0.39623	0.0560327
25	17	mALDOB	0.456693	0.114763
25	18	mALDOB	0.565586	0.221923
25	19	mALDOB	0.740858	0.395462
25	20	mALDOB	0.986365	0.639236
25	21	mALDOB	1.27259	0.923726
25	22	mALDOB	1.54019	1.1896
25	23	mALDOB	1.73879	1.38647
25	24	mALDOB	1.87435	1.52029
25	25	mALDOB	1.967	1.6112
25	26	mALDOB	2.02886	1.67133
25	27	mALDOB	2.07234	1.71308
25	28	mALDOB	2.09783	1.73684
25	29	mALDOB	2.12185	1.75912
25	30	mALDOB	2.14235	1.77789
25	31	mALDOB	2.15605	1.78985
25	32	mALDOB	2.16329	1.79536
25	33	mALDOB	2.17148	1.80183
25	34	mALDOB	2.18338	1.81199
25	35	mALDOB	2.1923	1.81918
25	36	mALDOB	2.19654	1.82168
25	37	mALDOB	2.19508	1.81849
25	38	mALDOB	2.19686	1.81854
25	39	mALDOB	2.19914	1.81908
25	40	mALDOB	2.19912	1.81733
26	1	mALDOB	0.0815544	0.00445751
26	2	mALDOB	0.0812612	0.00364623
26	3	mALDOB	0.0802651	0.002132
26	4	mALDOB	0.0792072	0.000555968
26	5	mALDOB	0.0788831	-0.00028618
26	6	mALDOB	0.0789321	-0.000755315
26	7	mALDOB	0.0792116	-0.000993966
26	8	mALDOB	0.079757	-0.000966668
26	9	mALDOB	0.0801797	-0.00106211
26	10	mALDOB	0.0807755	-0.000984366
26	11	mALDOB	0.0817181	-0.000559901
26	12	mALDOB	0.0831676	0.00037142
26	13	mALDOB	0.0858634	0.00254912
26	14	mALDOB	0.0914082	0.00757582
26	15	mALDOB	0.102042	0.0176913
26	16	mALDOB	0.122907	0.0380384
26	17	mALDOB	0.162887	0.0775002
26	18	mALDOB	0.234408	0.148503
26	19	mALDOB	0.352095	0.265672
26	20	mALDOB	0.520686	0.433745
26	21	mALDOB	0.723362	0.635903
26	22	mALDOB	0.92348	0.835503
26	23	mALDOB	1.08488	0.996387
26	24	mALDOB	1.20147	1.11246
26	25	mALDOB	1.28546	1.19593
26	26	mALDOB	1.34356	1.25351
26	27	mALDOB	1.38956	1.299
26	28	mALDOB	1.42443	1.33334
26	29	mALDOB	1.45387	1.36227
26	30	mALDOB	1.47623	1.3841
26	31	mALDOB	1.49719	1.40455
26	32	mALDOB	1.51615	1.42299
26	33	mALDOB	1.53396	1.44029
26	34	mALDOB	1.54811	1.45392
26	35	mALDOB	1.55866	1.46395
26	36	mALDOB	1.56919	1.47396
26	37	mALDOB	1.57828	1.48253
26	38	mALDOB	1.58529	1.48902
26	39	mALDOB	1.59125	1.49446
26	40	mALDOB	1.5965	1.4992
27	1	mALDOB	0.151217	-0.000297644
27	2	mALDOB	0.152372	-0.000247027
27	3	mALDOB	0.154026	0.000302867
27	4	mALDOB	0.15579	0.000962047
27	5	mALDOB	0.156872	0.000938739
27	6	mALDOB	0.157258	0.000220203
27	7	mALDOB	0.157583	-0.000558848
27	8	mALDOB	0.157869	-0.00137835
27	9	mALDOB	0.159099	-0.00125211
27	10	mALDOB	0.160336	-0.00112027
27	11	mALDOB	0.16154	-0.00102056
27	12	mALDOB	0.163582	-8.31864e-05
27	13	mALDOB	0.16776	0.00298947
27	14	mALDOB	0.175533	0.00965844
27	15	mALDOB	0.190408	0.0234284
27	16	mALDOB	0.219077	0.0509931
27	17	mALDOB	0.273176	0.103987
27	18	mALDOB	0.370087	0.199793
27	19	mALDOB	0.53335	0.361952
27	20	mALDOB	0.775714	0.603211
27	21	mALDOB	1.07159	0.897981
27	22	mALDOB	1.36671	1.192
27	23	mALDOB	1.60992	1.4341
27	24	mALDOB	1.78034	1.60342
27	25	mALDOB	1.88742	1.7094
27	26	mALDOB	1.95519	1.77606
27	27	mALDOB	2.00626	1.82603
27	28	mALDOB	2.04142	1.86008
27	29	mALDOB	2.06732	1.88487
27	30	mALDOB	2.08582	1.90227
27	31	mALDOB	2.10022	1.91557
27	32	mALDOB	2.11016	1.9244
27	33	mALDOB	2.1199	1.93304
27	34	mALDOB	2.12631	1.93834
27	35	mALDOB	2.13266	1.94358
27	36	mALDOB	2.14142	1.95124
27	37	mALDOB	2.14694	1.95566
27	38	mALDOB	2.14829	1.9559
27	39	mALDOB	2.15186	1.95837
27	40	mALDOB	2.15245	1.95786
28	1	mALDOB	0.771804	-0.0184772
28	2	mALDOB	0.778576	-0.0173453
28	3	mALDOB	0.793464	-0.00809894
28	4	mALDOB	0.807175	-2.84268e-05
28	5	mALDOB	0.815094	0.00224994
28	6	mALDOB	0.823206	0.00472089
28	7	mALDOB	0.827523	0.00339693
28	8	mALDOB	0.832801	0.00303458
28	9	mALDOB	0.836355	0.000947798
28	10	mALDOB	0.839629	-0.00141918
28	11	mALDOB	0.845374	-0.00131477
28	12	mALDOB	0.850336	-0.00199327
28	13	mALDOB	0.856209	-0.00176143
28	14	mALDOB	0.863877	0.000265882
28	15	mALDOB	0.875449	0.00619736
28	16	mALDOB	0.894528	0.0196351
28	17	mALDOB	0.928727	0.0481933
28	18	mALDOB	0.990751	0.104577
28	19	mALDOB	1.09737	0.205556
28	20	mALDOB	1.26622	0.368766
28	21	mALDOB	1.49187	0.588772
28	22	mALDOB	1.73428	0.825539
28	23	mALDOB	1.94266	1.02828
28	24	mALDOB	2.0945	1.17448
28	25	mALDOB	2.19225	1.26659
28	26	mALDOB	2.25794	1.32664
28	27	mALDOB	2.29952	1.36258
28	28	mALDOB	2.33112	1.38854
28	29	mALDOB	2.35309	1.40486
28	30	mALDOB	2.36783	1.41397
28	31	mALDOB	2.38105	1.42155
28	32	mALDOB	2.39353	1.42838
28	33	mALDOB	2.40437	1.43359
28	34	mALDOB	2.40996	1.43354
28	35	mALDOB	2.41374	1.43167
28	36	mALDOB	2.41474	1.42703
28	37	mALDOB	2.41972	1.42637
28	38	mALDOB	2.42533	1.42634
28	39	mALDOB	2.42734	1.42271
28	40	mALDOB	2.42887	1.4186
29	1	mALDOB	0.137115	-0.000321022
29	2	mALDOB	0.138095	-0.000532899
29	3	mALDOB	0.139875	5.42998e-05
29	4	mALDOB	0.141638	0.000625882
29	5	mALDOB	0.142837	0.000632546
29	6	mALDOB	0.143416	1.95005e-05
29	7	mALDOB	0.144268	-0.000321107
29	8	mALDOB	0.145162	-0.000618918
29	9	mALDOB	0.146576	-0.000397633
29	10	mALDOB	0.14714	-0.00102491
29	11	mALDOB	0.14856	-0.000797976
29	12	mALDOB	0.150459	-9.03612e-05
29	13	mALDOB	0.153661	0.00191868
29	14	mALDOB	0.160526	0.00759249
29	15	mALDOB	0.173092	0.0189655
29	16	mALDOB	0.196787	0.041469
29	17	mALDOB	0.241578	0.0850672
29	18	mALDOB	0.323697	0.165995
29	19	mALDOB	0.464967	0.306072
29	20	mALDOB	0.68538	0.525294
29	21	mALDOB	0.974606	0.813327
29	22	mALDOB	1.28163	1.11916
29	23	mALDOB	1.54369	1.38003
29	24	mALDOB	1.72974	1.56489
29	25	mALDOB	1.85621	1.69017
29	26	mALDOB	1.93754	1.7703
29	27	mALDOB	1.98656	1.81813
29	28	mALDOB	2.0235	1.85388
29	29	mALDOB	2.04944	1.87862
29	30	mALDOB	2.06853	1.89652
29	31	mALDOB	2.08483	1.91162
29	32	mALDOB	2.09769	1.9233
29	33	mALDOB	2.10685	1.93126
29	34	mALDOB	2.11442	1.93764
29	35	mALDOB	2.12278	1.94481
29	36	mALDOB	2.12913	1.94997
29	37	mALDOB	2.13129	1.95093
29	38	mALDOB	2.13589	1.95434
29	39	mALDOB	2.13748	1.95474
29	40	mALDOB	2.13549	1.95156
30	1	mALDOB	1.18471	-0.0409928
30	2	mALDOB	1.20024	-0.0314887
30	3	mALDOB	1.22683	-0.0109216
30	4	mALDOB	1.24452	0.000744266
30	5	mALDOB	1.25407	0.004271
30	6	mALDOB	1.2619	0.00607896
30	7	mALDOB	1.2657	0.00385456
30	8	mALDOB	1.26956	0.00169477
30	9	mALDOB	1.27417	0.000276815
30	10	mALDOB	1.27875	-0.00116796
30	11	mALDOB	1.28483	-0.00111213
30	12	mALDOB	1.29065	-0.00131343
30	13	mALDOB	1.29571	-0.00227529
30	14	mALDOB	1.30388	-0.00012996
30	15	mALDOB	1.31586	0.00583257
30	16	mALDOB	1.34135	0.025296
30	17	mALDOB	1.38473	0.0626494
30	18	mALDOB	1.46254	0.134436
30	19	mALDOB	1.59467	0.26055
30	20	mALDOB	1.79903	0.458882
30	21	mALDOB	2.06441	0.718243
30	22	mALDOB	2.34091	0.988717
30	23	mALDOB	2.57243	1.21421
30	24	mALDOB	2.73827	1.37402
30	25	mALDOB	2.84886	1.4786
30	26	mALDOB	2.92255	1.54626
30	27	mALDOB	2.97767	1.59536
30	28	mALDOB	3.01865	1.63031
30	29	mALDOB	3.04535	1.65099
30	30	mALDOB	3.0562	1.65582
30	31	mALDOB	3.06712	1.66072
30	32	mALDOB	3.08274	1.67031
30	33	mALDOB	3.0955	1.67705
30	34	mALDOB	3.10109	1.67662
30	35	mALDOB	3.10302	1.67252
30	36	mALDOB	3.11254	1.67602
30	37	mALDOB	3.11996	1.67741
30	38	mALDOB	3.12537	1.67681
30	39	mALDOB	3.12883	1.67424
30	40	mALDOB	3.13373	1.67311
31	1	mALDOB	0.275926	-0.00403799
31	2	mALDOB	0.279637	-0.00210511
31	3	mALDOB	0.283462	-5.83042e-05
31	4	mALDOB	0.285704	0.000405197
31	5	mALDOB	0.287563	0.000486602
31	6	mALDOB	0.289126	0.000270878
31	7	mALDOB	0.290847	0.00021397
31	8	mALDOB	0.2919	-0.000511195
31	9	mALDOB	0.292596	-0.00159315
31	10	mALDOB	0.295043	-0.000924165
31	11	mALDOB	0.2976	-0.000145594
31	12	mALDOB	0.30138	0.00185577
31	13	mALDOB	0.307396	0.00609373
31	14	mALDOB	0.319151	0.0160712
31	15	mALDOB	0.340894	0.0360362
31	16	mALDOB	0.382736	0.0760996
31	17	mALDOB	0.459283	0.150868
31	18	mALDOB	0.593665	0.283472
31	19	mALDOB	0.802228	0.490258
31	20	mALDOB	1.08004	0.766294
31	21	mALDOB	1.38083	1.0653
31	22	mALDOB	1.64141	1.32411
31	23	mALDOB	1.83116	1.51208
31	24	mALDOB	1.9585	1.63764
31	25	mALDOB	2.03847	1.71583
31	26	mALDOB	2.09136	1.76695
31	27	mALDOB	2.12719	1.80099
31	28	mALDOB	2.15772	1.82974
31	29	mALDOB	2.17989	1.85014
31	30	mALDOB	2.19436	1.86283
31	31	mALDOB	2.20659	1.87328
31	32	mALDOB	2.22107	1.88598
31	33	mALDOB	2.22932	1.89245
31	34	mALDOB	2.23578	1.89713
31	35	mALDOB	2.24387	1.90345
31	36	mALDOB	2.24456	1.90236
31	37	mALDOB	2.24747	1.90349
31	38	mALDOB	2.25456	1.9088
31	39	mALDOB	2.25946	1.91193
31	40	mALDOB	2.25791	1.9086
32	1	mALDOB	0.0886026	3.35841e-05
32	2	mALDOB	0.0889868	-0.000488064
32	3	mALDOB	0.0906646	0.000283775
32	4	mALDOB	0.0919771	0.000690358
32	5	mALDOB	0.0925805	0.000387794
32	6	mALDOB	0.0929885	-0.000110132
32	7	mALDOB	0.0933245	-0.000680119
32	8	mALDOB	0.094063	-0.000847604
32	9	mALDOB	0.0950985	-0.000718042
32	10	mALDOB	0.0962321	-0.00049037
32	11	mALDOB	0.0974237	-0.000204726
32	12	mALDOB	0.100223	0.00168907
32	13	mALDOB	0.106166	0.00672526
32	14	mALDOB	0.116591	0.016245
32	15	mALDOB	0.136867	0.0356144
32	16	mALDOB	0.175642	0.0734842
32	17	mALDOB	0.247831	0.144766
32	18	mALDOB	0.375095	0.271125
32	19	mALDOB	0.577054	0.472178
32	20	mALDOB	0.853236	0.747454
32	21	mALDOB	1.16303	1.05635
32	22	mALDOB	1.44025	1.33265
32	23	mALDOB	1.64265	1.53415
32	24	mALDOB	1.78007	1.67066
32	25	mALDOB	1.86772	1.75741
32	26	mALDOB	1.92624	1.81502
32	27	mALDOB	1.96421	1.85209
32	28	mALDOB	1.9941	1.88107
32	29	mALDOB	2.01551	1.90158
32	30	mALDOB	2.02835	1.91351
32	31	mALDOB	2.04062	1.92488
32	32	mALDOB	2.05301	1.93636
32	33	mALDOB	2.0612	1.94364
32	34	mALDOB	2.06861	1.95014
32	35	mALDOB	2.07457	1.9552
32	36	mALDOB	2.07669	1.95641
32	37	mALDOB	2.0789	1.95772
32	38	mALDOB	2.08343	1.96134
32	39	mALDOB	2.08489	1.9619
32	40	mALDOB	2.08558	1.96168
33	1	mALDOB	0.111697	-0.00121506
33	2	mALDOB	0.113238	-0.000887707
33	3	mALDOB	0.115279	-6.07505e-05
33	4	mALDOB	0.116986	0.000433627
33	5	mALDOB	0.11851	0.000744191
33	6	mALDOB	0.11956	0.000580339
33	7	mALDOB	0.119875	-0.000317775
33	8	mALDOB	0.120614	-0.000792189
33	9	mALDOB	0.121521	-0.00109898
33	10	mALDOB	0.12223	-0.00160303
33	11	mALDOB	0.124694	-0.00035301
33	12	mALDOB	0.128728	0.00246757
33	13	mALDOB	0.13499	0.00751656
33	14	mALDOB	0.147036	0.0183488
33	15	mALDOB	0.17022	0.0403199
33	16	mALDOB	0.214678	0.0835644
33	17	mALDOB	0.294648	0.162321
33	18	mALDOB	0.432981	0.29944
33	19	mALDOB	0.649267	0.514512
33	20	mALDOB	0.934135	0.798168
33	21	mALDOB	1.23618	1.099
33	22	mALDOB	1.49567	1.35727
33	23	mALDOB	1.68576	1.54615
33	24	mALDOB	1.80526	1.66444
33	25	mALDOB	1.88245	1.74042
33	26	mALDOB	1.93138	1.78813
33	27	mALDOB	1.96849	1.82403
33	28	mALDOB	1.99551	1.84983
33	29	mALDOB	2.01324	1.86635
33	30	mALDOB	2.02883	1.88073
33	31	mALDOB	2.042	1.89269
33	32	mALDOB	2.04824	1.89771
33	33	mALDOB	2.0551	1.90336
33	34	mALDOB	2.06296	1.91
33	35	mALDOB	2.07003	1.91586
33	36	mALDOB	2.07296	1.91758
33	37	mALDOB	2.07561	1.91901
33	38	mALDOB	2.08002	1.92221
33	39	mALDOB	2.08165	1.92263
33	40	mALDOB	2.08337	1.92313
34	1	mALDOB	0.104728	-0.000501236
34	2	mALDOB	0.105644	-0.000651254
34	3	mALDOB	0.107312	-4.95386e-05
34	4	mALDOB	0.108783	0.000354811
34	5	mALDOB	0.110244	0.000750265
34	6	mALDOB	0.110587	2.72233e-05
34	7	mALDOB	0.111078	-0.000548387
34	8	mALDOB	0.112002	-0.000690455
34	9	mALDOB	0.112669	-0.00109019
34	10	mALDOB	0.114545	-0.00027978
34	11	mALDOB	0.117417	0.00152605
34	12	mALDOB	0.123602	0.00664474
34	13	mALDOB	0.13529	0.0172665
34	14	mALDOB	0.157281	0.0381904
34	15	mALDOB	0.19874	0.0785832
34	16	mALDOB	0.275148	0.153925
34	17	mALDOB	0.409116	0.286827
34	18	mALDOB	0.620631	0.497276
34	19	mALDOB	0.90528	0.780859
34	20	mALDOB	1.2175	1.09201
34	21	mALDOB	1.49297	1.36642
34	22	mALDOB	1.69657	1.56895
34	23	mALDOB	1.83224	1.70356
34	24	mALDOB	1.92049	1.79074
34	25	mALDOB	1.97857	1.84775
34	26	mALDOB	2.0159	1.88402
34	27	mALDOB	2.04671	1.91376
34	28	mALDOB	2.0664	1.93238
34	29	mALDOB	2.0767	1.94162
34	30	mALDOB	2.09395	1.9578
34	31	mALDOB	2.10827	1.97105
34	32	mALDOB	2.1181	1.97982
34	33	mALDOB	2.12218	1.98283
34	34	mALDOB	2.12621	1.9858
34	35	mALDOB	2.13403	1.99255
34	36	mALDOB	2.13591	1.99336
34	37	mALDOB	2.13431	1.9907
34	38	mALDOB	2.13802	1.99334
34	39	mALDOB	2.13971	1.99396
34	40	mALDOB	2.1408	1.99399
35	1	mALDOB	0.0972182	0.00116684
35	2	mALDOB	0.0980201	0.00072197
35	3	mALDOB	0.0994434	0.000898449
35	4	mALDOB	0.100444	0.000652108
35	5	mALDOB	0.101079	4.06216e-05
35	6	mALDOB	0.101866	-0.000419648
35	7	mALDOB	0.102472	-0.0010606
35	8	mALDOB	0.103518	-0.00126119
35	9	mALDOB	0.105107	-0.000918442
35	10	mALDOB	0.107238	-3.4985e-05
35	11	mALDOB	0.110623	0.00210369
35	12	mALDOB	0.117342	0.00757529
35	13	mALDOB	0.130533	0.0195194
35	14	mALDOB	0.156506	0.0442456
35	15	mALDOB	0.205415	0.0919086
35	16	mALDOB	0.294271	0.179517
35	17	mALDOB	0.445624	0.329624
35	18	mALDOB	0.67801	0.560763
35	19	mALDOB	0.978343	0.859849
35	20	mALDOB	1.2881	1.16836
35	21	mALDOB	1.55038	1.42939
35	22	mALDOB	1.73511	1.61288
35	23	mALDOB	1.85311	1.72963
35	24	mALDOB	1.92518	1.80046
35	25	mALDOB	1.97723	1.85126
35	26	mALDOB	2.01625	1.88903
35	27	mALDOB	2.04039	1.91192
35	28	mALDOB	2.05758	1.92787
35	29	mALDOB	2.07127	1.94031
35	30	mALDOB	2.08139	1.94918
35	31	mALDOB	2.09179	1.95833
35	32	mALDOB	2.09861	1.9639
35	33	mALDOB	2.10279	1.96684
35	34	mALDOB	2.10383	1.96663
35	35	mALDOB	2.10978	1.97134
35	36	mALDOB	2.11492	1.97523
35	37	mALDOB	2.11902	1.97808
35	38	mALDOB	2.1226	1.98041
35	39	mALDOB	2.12282	1.97939
35	40	mALDOB	2.12832	1.98364
36	1	mALDOB	0.10179	-0.00140717
36	2	mALDOB	0.103204	-0.00100937
36	3	mALDOB	0.105776	0.00054546
36	4	mALDOB	0.106899	0.000651091
36	5	mALDOB	0.107101	-0.000164371
36	6	mALDOB	0.108121	-0.000161201
36	7	mALDOB	0.108823	-0.000476581
36	8	mALDOB	0.109489	-0.000827656
36	9	mALDOB	0.110205	-0.00112819
36	10	mALDOB	0.111867	-0.000483424
36	11	mALDOB	0.115412	0.00204487
36	12	mALDOB	0.120414	0.00602961
36	13	mALDOB	0.130864	0.0154618
36	14	mALDOB	0.15137	0.0349514
36	15	mALDOB	0.190265	0.0728291
36	16	mALDOB	0.262349	0.143896
36	17	mALDOB	0.389648	0.270178
36	18	mALDOB	0.593316	0.472829
36	19	mALDOB	0.873247	0.751743
36	20	mALDOB	1.18774	1.06521
36	21	mALDOB	1.47065	1.34711
36	22	mALDOB	1.682	1.55745
36	23	mALDOB	1.82322	1.69765
36	24	mALDOB	1.91201	1.78542
36	25	mALDOB	1.97319	1.84559
36	26	mALDOB	2.01298	1.88436
36	27	mALDOB	2.0454	1.91575
36	28	mALDOB	2.06552	1.93486
36	29	mALDOB	2.07995	1.94828
36	30	mALDOB	2.09238	1.95969
36	31	mALDOB	2.10546	1.97175
36	32	mALDOB	2.11232	1.9776
36	33	mALDOB	2.11824	1.98249
36	34	mALDOB	2.12276	1.986
36	35	mALDOB	2.12615	1.98837
36	36	mALDOB	2.12746	1.98866
36	37	mALDOB	2.1307	1.99088
36	38	mALDOB	2.12976	1.98893
36	39	mALDOB	2.1316	1.98975
36	40	mALDOB	2.13552	1.99266
37	1	mALDOB	0.10604	-0.00222437
37	2	mALDOB	0.107434	-0.00153452
37	3	mALDOB	0.109578	-9.53234e-05
37	4	mALDOB	0.11078	0.000401758
37	5	mALDOB	0.111474	0.000391031
37	6	mALDOB	0.111626	-0.000160817
37	7	mALDOB	0.112253	-0.000238675
37	8	mALDOB	0.113208	1.19345e-05
37	9	mALDOB	0.113683	-0.000217319
37	10	mALDOB	0.114321	-0.000284276
37	11	mALDOB	0.114818	-0.000491788
37	12	mALDOB	0.115427	-0.000587064
37	13	mALDOB	0.11799	0.00127054
37	14	mALDOB	0.122496	0.00507276
37	15	mALDOB	0.129836	0.0117083
37	16	mALDOB	0.144505	0.0256729
37	17	mALDOB	0.173203	0.0536657
37	18	mALDOB	0.227688	0.107447
37	19	mALDOB	0.325403	0.204457
37	20	mALDOB	0.491197	0.369546
37	21	mALDOB	0.739479	0.617123
37	22	mALDOB	1.0494	0.926336
37	23	mALDOB	1.35681	1.23305
37	24	mALDOB	1.60332	1.47885
37	25	mALDOB	1.77396	1.64878
37	26	mALDOB	1.88399	1.75811
37	27	mALDOB	1.95455	1.82797
37	28	mALDOB	1.998	1.87071
37	29	mALDOB	2.03039	1.9024
37	30	mALDOB	2.05111	1.92241
37	31	mALDOB	2.06931	1.93991
37	32	mALDOB	2.08394	1.95383
37	33	mALDOB	2.09582	1.96501
37	34	mALDOB	2.10464	1.97313
37	35	mALDOB	2.11123	1.97901
37	36	mALDOB	2.11496	1.98204
37	37	mALDOB	2.12328	1.98965
37	38	mALDOB	2.12698	1.99265
37	39	mALDOB	2.12688	1.99184
37	40	mALDOB	2.13456	1.99882
38	1	mALDOB	0.0971257	0.00128654
38	2	mALDOB	0.0971437	0.000607075
38	3	mALDOB	0.0975199	0.000285878
38	4	mALDOB	0.0982759	0.000344476
38	5	mALDOB	0.0991848	0.000555906
38	6	mALDOB	0.0997458	0.000419529
38	7	mALDOB	0.0996777	-0.000345982
38	8	mALDOB	0.0998007	-0.000920379
38	9	mALDOB	0.100794	-0.0006246
38	10	mALDOB	0.101063	-0.00105332
38	11	mALDOB	0.102133	-0.000680386
38	12	mALDOB	0.103865	0.000353887
38	13	mALDOB	0.105873	0.00166499
38	14	mALDOB	0.1098	0.00489392
38	15	mALDOB	0.117437	0.011834
38	16	mALDOB	0.132984	0.0266832
38	17	mALDOB	0.162307	0.0553087
38	18	mALDOB	0.216511	0.108815
38	19	mALDOB	0.315213	0.20682
38	20	mALDOB	0.481609	0.372519
38	21	mALDOB	0.731074	0.621286
38	22	mALDOB	1.04135	0.930863
38	23	mALDOB	1.34924	1.23806
38	24	mALDOB	1.59518	1.4833
38	25	mALDOB	1.76571	1.65313
38	26	mALDOB	1.8733	1.76003
38	27	mALDOB	1.94384	1.82987
38	28	mALDOB	1.99231	1.87764
38	29	mALDOB	2.02442	1.90905
38	30	mALDOB	2.04579	1.92973
38	31	mALDOB	2.06066	1.94389
38	32	mALDOB	2.07646	1.959
38	33	mALDOB	2.08917	1.97101
38	34	mALDOB	2.09503	1.97618
38	35	mALDOB	2.10059	1.98103
38	36	mALDOB	2.10766	1.98741
38	37	mALDOB	2.11471	1.99376
38	38	mALDOB	2.11566	1.99401
38	39	mALDOB	2.1197	1.99736
38	40	mALDOB	2.1216	1.99856
39	1	mALDOB	0.118589	-0.000177366
39	2	mALDOB	0.119155	-0.00027258
39	3	mALDOB	0.120285	0.000196647
39	4	mALDOB	0.120932	0.000183166
39	5	mALDOB	0.121495	8.59704e-05
39	6	mALDOB	0.122127	5.67536e-05
39	7	mALDOB	0.122666	-6.48428e-05
39	8	mALDOB	0.12313	-0.000261861
39	9	mALDOB	0.123717	-0.000335677
39	10	mALDOB	0.124387	-0.000326106
39	11	mALDOB	0.125053	-0.000320417
39	12	mALDOB	0.125995	-3.97791e-05
39	13	mALDOB	0.127521	0.000826147
39	14	mALDOB	0.13167	0.00431405
39	15	mALDOB	0.139549	0.0115323
39	16	mALDOB	0.154321	0.0256442
39	17	mALDOB	0.182952	0.0536146
39	18	mALDOB	0.236622	0.106624
39	19	mALDOB	0.33476	0.204101
39	20	mALDOB	0.499391	0.368071
39	21	mALDOB	0.748213	0.616232
39	22	mALDOB	1.05997	0.927326
39	23	mALDOB	1.37154	1.23824
39	24	mALDOB	1.61649	1.48253
39	25	mALDOB	1.78677	1.65215
39	26	mALDOB	1.89982	1.76453
39	27	mALDOB	1.97182	1.83587
39	28	mALDOB	2.02019	1.88359
39	29	mALDOB	2.05365	1.91638
39	30	mALDOB	2.07605	1.93812
39	31	mALDOB	2.09063	1.95205
39	32	mALDOB	2.10727	1.96802
39	33	mALDOB	2.1194	1.97949
39	34	mALDOB	2.12759	1.98702
39	35	mALDOB	2.13127	1.99004
39	36	mALDOB	2.13736	1.99547
39	37	mALDOB	2.14026	1.9977
39	38	mALDOB	2.14705	2.00384
39	39	mALDOB	2.14855	2.00467
39	40	mALDOB	2.1431	1.99856
40	1	mALDOB	0.149324	-0.000821864
40	2	mALDOB	0.15078	-0.000350836
40	3	mALDOB	0.152049	-6.66686e-05
40	4	mALDOB	0.153193	9.34316e-05
40	5	mALDOB	0.154454	0.00036994
40	6	mALDOB	0.155187	0.000118366
40	7	mALDOB	0.15615	9.63588e-05
40	8	mALDOB	0.156686	-0.00035209
40	9	mALDOB	0.157696	-0.000327366
40	10	mALDOB	0.158532	-0.000475437
40	11	mALDOB	0.159404	-0.00058767
40	12	mALDOB	0.162108	0.00113114
40	13	mALDOB	0.166601	0.00463957
40	14	mALDOB	0.175431	0.0124852
40	15	mALDOB	0.192073	0.0281424
40	16	mALDOB	0.224001	0.0590861
40	17	mALDOB	0.284374	0.118475
40	18	mALDOB	0.392812	0.225927
40	19	mALDOB	0.572297	0.404429
40	20	mALDOB	0.833034	0.664181
40	21	mALDOB	1.14891	0.979072
40	22	mALDOB	1.45142	1.2806
40	23	mALDOB	1.68497	1.51316
40	24	mALDOB	1.84125	1.66846
40	25	mALDOB	1.94256	1.76878
40	26	mALDOB	2.00728	1.83252
40	27	mALDOB	2.04921	1.87346
40	28	mALDOB	2.08188	1.90515
40	29	mALDOB	2.10578	1.92806
40	30	mALDOB	2.12696	1.94826
40	31	mALDOB	2.13899	1.9593
40	32	mALDOB	2.14568	1.96501
40	33	mALDOB	2.15059	1.96893
40	34	mALDOB	2.16277	1.98013
40	35	mALDOB	2.16979	1.98617
40	36	mALDOB	2.17149	1.98688
40	37	mALDOB	2.17391	1.98832
40	38	mALDOB	2.17468	1.98811
40	39	mALDOB	2.17607	1.98851
40	40	mALDOB	2.17675	1.98821
41	1	mALDOB	0.143518	-0.0029385
41	2	mALDOB	0.145437	-0.00223671
41	3	mALDOB	0.148333	-0.000556856
41	4	mALDOB	0.150447	0.00033993
41	5	mALDOB	0.151895	0.000570143
41	6	mALDOB	0.152919	0.000377208
41	7	mALDOB	0.153653	-0.000105078
41	8	mALDOB	0.154937	-3.85841e-05
41	9	mALDOB	0.155819	-0.000373557
41	10	mALDOB	0.156597	-0.000812168
41	11	mALDOB	0.158089	-0.000537251
41	12	mALDOB	0.16098	0.00113621
41	13	mALDOB	0.16556	0.00449952
41	14	mALDOB	0.174852	0.0125743
41	15	mALDOB	0.192629	0.0291337
41	16	mALDOB	0.227126	0.062414
41	17	mALDOB	0.291498	0.125569
41	18	mALDOB	0.406775	0.239629
41	19	mALDOB	0.594768	0.426405
41	20	mALDOB	0.86283	0.693249
41	21	mALDOB	1.17952	1.00872
41	22	mALDOB	1.47315	1.30113
41	23	mALDOB	1.69498	1.52175
41	24	mALDOB	1.84294	1.66849
41	25	mALDOB	1.93692	1.76125
41	26	mALDOB	1.99554	1.81866
41	27	mALDOB	2.03316	1.85506
41	28	mALDOB	2.06464	1.88533
41	29	mALDOB	2.08688	1.90635
41	30	mALDOB	2.10638	1.92463
41	31	mALDOB	2.11863	1.93566
41	32	mALDOB	2.12685	1.94267
41	33	mALDOB	2.13331	1.94791
41	34	mALDOB	2.13842	1.9518
41	35	mALDOB	2.14152	1.95368
41	36	mALDOB	2.14231	1.95326
41	37	mALDOB	2.14758	1.95731
41	38	mALDOB	2.15154	1.96005
41	39	mALDOB	2.15535	1.96265
41	40	mALDOB	2.1561	1.96218
42	1	mALDOB	0.127372	-0.00313989
42	2	mALDOB	0.129414	-0.00236055
42	3	mALDOB	0.132712	-0.000325209
42	4	mALDOB	0.134649	0.000349164
42	5	mALDOB	0.135798	0.000234835
42	6	mALDOB	0.137297	0.000471144
42	7	mALDOB	0.138197	0.000109082
42	8	mALDOB	0.13906	-0.00029065
42	9	mALDOB	0.139808	-0.000805895
42	10	mALDOB	0.141279	-0.00059763
42	11	mALDOB	0.143032	-0.000107003
42	12	mALDOB	0.145364	0.000962162
42	13	mALDOB	0.150398	0.00473298
42	14	mALDOB	0.15983	0.0129028
42	15	mALDOB	0.177645	0.0294544
42	16	mALDOB	0.211945	0.0624924
42	17	mALDOB	0.276123	0.125407
42	18	mALDOB	0.391083	0.239105
42	19	mALDOB	0.58005	0.426809
42	20	mALDOB	0.852247	0.697744
42	21	mALDOB	1.17508	1.01931
42	22	mALDOB	1.4784	1.32137
42	23	mALDOB	1.70972	1.55143
42	24	mALDOB	1.86411	1.70456
42	25	mALDOB	1.96298	1.80217
42	26	mALDOB	2.02561	1.86353
42	27	mALDOB	2.06795	1.9046
42	28	mALDOB	2.09948	1.93487
42	29	mALDOB	2.11853	1.95266
42	30	mALDOB	2.1345	1.96737
42	31	mALDOB	2.14553	1.97714
42	32	mALDOB	2.1567	1.98705
42	33	mALDOB	2.16547	1.99456
42	34	mALDOB	2.17198	1.9998
42	35	mALDOB	2.17821	2.00477
42	36	mALDOB	2.18417	2.00947
42	37	mALDOB	2.18644	2.01047
42	38	mALDOB	2.19151	2.01427
42	39	mALDOB	2.19015	2.01165
42	40	mALDOB	2.19214	2.01238
43	1
43	2
43	3
43	4
43	5
43	6
43	7
43	8
43	9
43	10
43	11
43	12
43	13
43	14
43	15
43	16
43	17
43	18
43	19
43	20
43	21
43	22
43	23
43	24
43	25
43	26
43	27
43	28
43	29
43	30
43	31
43	32
43	33
43	34
43	35
43	36
43	37
43	38
43	39
43	40
44	1
44	2
44	3
44	4
44	5
44	6
44	7
44	8
44	9
44	10
44	11
44	12
44	13
44	14
44	15
44	16
44	17
44	18
44	19
44	20
44	21
44	22
44	23
44	24
44	25
44	26
44	27
44	28
44	29
44	30
44	31
44	32
44	33
44	34
44	35
44	36
44	37
44	38
44	39
44	40
45	1
45	2
45	3
45	4
45	5
45	6
45	7
45	8
45	9
45	10
45	11
45	12
45	13
45	14
45	15
45	16
45	17
45	18
45	19
45	20
45	21
45	22
45	23
45	24
45	25
45	26
45	27
45	28
45	29
45	30
45	31
45	32
45	33
45	34
45	35
45	36
45	37
45	38
45	39
45	40
46	1
46	2
46	3
46	4
46	5
46	6
46	7
46	8
46	9
46	10
46	11
46	12
46	13
46	14
46	15
46	16
46	17
46	18
46	19
46	20
46	21
46	22
46	23
46	24
46	25
46	26
46	27
46	28
46	29
46	30
46	31
46	32
46	33
46	34
46	35
46	36
46	37
46	38
46	39
46	40
47	1
47	2
47	3
47	4
47	5
47	6
47	7
47	8
47	9
47	10
47	11
47	12
47	13
47	14
47	15
47	16
47	17
47	18
47	19
47	20
47	21
47	22
47	23
47	24
47	25
47	26
47	27
47	28
47	29
47	30
47	31
47	32
47	33
47	34
47	35
47	36
47	37
47	38
47	39
47	40
48	1
48	2
48	3
48	4
48	5
48	6
48	7
48	8
48	9
48	10
48	11
48	12
48	13
48	14
48	15
48	16
48	17
48	18
48	19
48	20
48	21
48	22
48	23
48	24
48	25
48	26
48	27
48	28
48	29
48	30
48	31
48	32
48	33
48	34
48	35
48	36
48	37
48	38
48	39
48	40
49	1	mALDH8A1	0.237505	-0.00273189
49	2	mALDH8A1	0.238597	-0.00199952
49	3	mALDH8A1	0.239551	-0.00140538
49	4	mALDH8A1	0.240287	-0.00102958
49	5	mALDH8A1	0.24186	0.00018316
49	6	mALDH8A1	0.2431	0.0010635
49	7	mALDH8A1	0.243704	0.00130686
49	8	mALDH8A1	0.244142	0.00138536
49	9	mALDH8A1	0.244191	0.00107408
49	10	mALDH8A1	0.244588	0.00111122
49	11	mALDH8A1	0.244323	0.000485594
49	12	mALDH8A1	0.243295	-0.000902365
49	13	mALDH8A1	0.242471	-0.00208658
49	14	mALDH8A1	0.242593	-0.00232401
49	15	mALDH8A1	0.24373	-0.00154705
49	16	mALDH8A1	0.245505	-0.000132263
49	17	mALDH8A1	0.246214	0.000215868
49	18	mALDH8A1	0.248959	0.00260158
49	19	mALDH8A1	0.253622	0.00690415
49	20	mALDH8A1	0.263151	0.016073
49	21	mALDH8A1	0.283022	0.0355846
49	22	mALDH8A1	0.319469	0.0716713
49	23	mALDH8A1	0.384084	0.135926
49	24	mALDH8A1	0.490375	0.241857
49	25	mALDH8A1	0.64664	0.397762
49	26	mALDH8A1	0.841256	0.592018
49	27	mALDH8A1	1.04622	0.796619
49	28	mALDH8A1	1.22652	0.976559
49	29	mALDH8A1	1.36786	1.11755
49	30	mALDH8A1	1.47669	1.22602
49	31	mALDH8A1	1.56058	1.30954
49	32	mALDH8A1	1.62791	1.37651
49	33	mALDH8A1	1.68134	1.42958
49	34	mALDH8A1	1.72336	1.47124
49	35	mALDH8A1	1.756	1.50352
49	36	mALDH8A1	1.78085	1.52801
49	37	mALDH8A1	1.7988	1.5456
49	38	mALDH8A1	1.81488	1.56132
49	39	mALDH8A1	1.82241	1.56849
49	40	mALDH8A1	1.82598	1.5717
50	1	mALDH8A1	0.245217	-0.00318092
50	2	mALDH8A1	0.246158	-0.00251614
50	3	mALDH8A1	0.247433	-0.00151669
50	4	mALDH8A1	0.248768	-0.000457463
50	5	mALDH8A1	0.250474	0.000972089
[truncated: 13,395 more rows]

## Sheet: Results
Block Type	384-Well Block
Calibration Background is expired	Yes
Calibration Background performed on	10-12-2018 11:47:46 PDT
Calibration FAM is expired	Yes
Calibration FAM performed on	10-23-2018 10:23:19 PDT
Calibration MELTDOCTOR is expired	Yes
Calibration MELTDOCTOR performed on	09-26-2017 21:22:46 PDT
Calibration NED is expired	Yes
Calibration NED performed on	10-23-2018 10:33:14 PDT
Calibration ROI is expired	Yes
Calibration ROI performed on	10-12-2018 09:37:21 PDT
Calibration ROX is expired	Yes
Calibration ROX performed on	10-23-2018 10:07:21 PDT
Calibration SYBR is expired	Yes
Calibration SYBR performed on	10-23-2018 09:57:53 PDT
Calibration TAMRA is expired	Yes
Calibration TAMRA performed on	10-23-2018 10:45:25 PDT
Calibration Uniformity is expired	Yes
Calibration Uniformity performed on	10-12-2018 10:06:59 PDT
Calibration VIC is expired	Yes
Calibration VIC performed on	10-23-2018 10:54:25 PDT
Chemistry	SYBR_GREEN
Date Created	02-03-2021 22:18:32 PST
Experiment File Name	D:\NZZ\2021-02-03 203555.eds
Experiment Name	2021-02-03 203555
Experiment Run End Time	02-03-2021 15:13:12 PST
Experiment Type	Comparative Cт (ΔΔCт)
Instrument Name	285880860
Instrument Serial Number	285880860
Instrument Type	QuantStudio 12K Flex
Passive Reference	ROX
Quantification Cycle Method	Ct
Signal Smoothing On	true
Stage/ Cycle where Analysis is performed	Stage 2, Step 2
Well	Well Position	Omit	Sample Name	Target Name	Task	Reporter	Quencher	RQ	RQ Min	RQ Max	CT	Ct Mean	Ct SE	Quantity	Delta Ct Mean	Delta Ct SE	Delta Delta Ct	Automatic Ct Threshold	Ct Threshold	Automatic Baseline	Baseline Start	Baseline End	Efficiency	Comments	Amp Score	Cq Conf	Tm1	Tm2	Tm3	MTP	EXPFAIL	HIGHSD	NOAMP	THOLDFAIL	OUTLIERRG
4	A4	false	vec-c	mCYC	UNKNOWN	SYBR	None				18.935	18.8106	0.0738117					true	0.205133	true	3	13			1.34737	0.97739	85.2361			N	N	N	N	N	N
5	A5	false	vec-c	mCYC	UNKNOWN	SYBR	None				18.679	18.8106	0.0738117					true	0.205133	true	3	13			1.34902	0.973292	85.2361			N	N	N	N	N	N
6	A6	false	vec-c	mCYC	UNKNOWN	SYBR	None				18.818	18.8106	0.0738117					true	0.205133	true	3	13			1.35116	0.975266	85.2361			N	N	N	N	N	N
10	A10	false	HBx-n	mCYC	UNKNOWN	SYBR	None				18.603	18.6446	0.0651784					true	0.205133	true	3	13			1.35376	0.97261	85.2361			N	N	N	N	N	N
11	A11	false	HBx-n	mCYC	UNKNOWN	SYBR	None				18.772	18.6446	0.0651784					true	0.205133	true	3	13			1.35331	0.971738	85.3647			N	N	N	N	N	N
12	A12	false	HBx-n	mCYC	UNKNOWN	SYBR	None				18.558	18.6446	0.0651784					true	0.205133	true	3	13			1.34072	0.974619	85.3647			N	N	N	N	N	N
16	A16	false	HBx-w10	mCYC	UNKNOWN	SYBR	None				18.406	18.4236	0.0154412					true	0.205133	true	3	13			1.35535	0.971707	85.3647			N	N	N	N	N	N
17	A17	false	HBx-w10	mCYC	UNKNOWN	SYBR	None				18.454	18.4236	0.0154412					true	0.205133	true	3	13			1.35606	0.966308	85.3647			N	N	N	N	N	N
18	A18	false	HBx-w10	mCYC	UNKNOWN	SYBR	None				18.411	18.4236	0.0154412					true	0.205133	true	3	13			1.35475	0.966394	85.2361			N	N	N	N	N	N
28	B4	false	vec-c	mALDOB	UNKNOWN	SYBR	None	0.56756	0.385202	0.836249	18.485	18.1475	0.18738		-0.66313	0.201394	0.817155	true	0.149416	true	3	14			1.30857	0.913791	83.9498			N	N	N	N	N	N
29	B5	false	vec-c	mALDOB	UNKNOWN	SYBR	None	0.56756	0.385202	0.836249	17.838	18.1475	0.18738		-0.66313	0.201394	0.817155	true	0.149416	true	3	13			1.36594	0.974194	83.8212			N	N	N	N	N	N
30	B6	false	vec-c	mALDOB	UNKNOWN	SYBR	None	0.56756	0.385202	0.836249	18.119	18.1475	0.18738		-0.66313	0.201394	0.817155	true	0.149416	true	3	14			1.3446	0.872213	83.9498			N	N	N	N	N	N
34	B10	false	HBx-n	mALDOB	UNKNOWN	SYBR	None	2.3963	1.91678	2.99578	15.952	15.9035	0.0959817		-2.74109	0.11602	-1.26081	true	0.149416	true	3	11			1.36538	0.975984	83.9498			N	N	N	N	N	N
35	B11	false	HBx-n	mALDOB	UNKNOWN	SYBR	None	2.3963	1.91678	2.99578	15.718	15.9035	0.0959817		-2.74109	0.11602	-1.26081	true	0.149416	true	3	11			1.37112	0.977518	83.9498			N	N	N	N	N	N
36	B12	false	HBx-n	mALDOB	UNKNOWN	SYBR	None	2.3963	1.91678	2.99578	16.04	15.9035	0.0959817		-2.74109	0.11602	-1.26081	true	0.149416	true	3	11			1.36794	0.969673	83.9498			N	N	N	N	N	N
40	B16	false	HBx-w10	mALDOB	UNKNOWN	SYBR	None	0.789724	0.739506	0.843354	17.345	17.2839	0.0304486		-1.13971	0.0341402	0.340579	true	0.149416	true	3	12			1.37267	0.974685	83.9498			N	N	N	N	N	N
41	B17	false	HBx-w10	mALDOB	UNKNOWN	SYBR	None	0.789724	0.739506	0.843354	17.25	17.2839	0.0304486		-1.13971	0.0341402	0.340579	true	0.149416	true	3	12			1.37022	0.964319	83.9498			N	N	N	N	N	N
42	B18	false	HBx-w10	mALDOB	UNKNOWN	SYBR	None	0.789724	0.739506	0.843354	17.257	17.2839	0.0304486		-1.13971	0.0341402	0.340579	true	0.149416	true	3	12			1.37596	0.964377	83.9498			N	N	N	N	N	N
52	C4	false	vec-c	mALDH8A1	UNKNOWN	SYBR	None	0.771353	0.657151	0.905401	22.459	22.4091	0.0385232		3.59848	0.0832598	0.374538	true	0.15147	true	3	17			1.29187	0.985984	84.3357			N	N	N	N	N	N
53	C5	false	vec-c	mALDH8A1	UNKNOWN	SYBR	None	0.771353	0.657151	0.905401	22.333	22.4091	0.0385232		3.59848	0.0832598	0.374538	true	0.15147	true	3	17			1.29995	0.987715	84.3357			N	N	N	N	N	N
54	C6	false	vec-c	mALDH8A1	UNKNOWN	SYBR	None	0.771353	0.657151	0.905401	22.435	22.4091	0.0385232		3.59848	0.0832598	0.374538	true	0.15147	true	3	17			1.29441	0.975617	84.3357			N	N	N	N	N	N
58	C10	false	HBx-n	mALDH8A1	UNKNOWN	SYBR	None	0.475775	0.414345	0.546313	22.88	22.9402	0.0302018		4.29559	0.0718358	1.07165	true	0.15147	true	3	18			1.29579	0.973806	84.3357			N	N	N	N	N	N
59	C11	false	HBx-n	mALDH8A1	UNKNOWN	SYBR	None	0.475775	0.414345	0.546313	22.976	22.9402	0.0302018		4.29559	0.0718358	1.07165	true	0.15147	true	3	18			1.296	0.979	84.4643			N	N	N	N	N	N
60	C12	false	HBx-n	mALDH8A1	UNKNOWN	SYBR	None	0.475775	0.414345	0.546313	22.964	22.9402	0.0302018		4.29559	0.0718358	1.07165	true	0.15147	true	3	18			1.29485	0.982162	84.4643			N	N	N	N	N	N
64	C16	false	HBx-w10	mALDH8A1	UNKNOWN	SYBR	None	0.85605	0.79419	0.922728	21.943	21.8718	0.0357852		3.44817	0.0389745	0.224233	true	0.15147	true	3	17			1.30079	0.983029	84.4643			N	N	N	N	N	N
65	C17	false	HBx-w10	mALDH8A1	UNKNOWN	SYBR	None	0.85605	0.79419	0.922728	21.838	21.8718	0.0357852		3.44817	0.0389745	0.224233	true	0.15147	true	3	17			1.30174	0.968157	84.4643			N	N	N	N	N	N
66	C18	false	HBx-w10	mALDH8A1	UNKNOWN	SYBR	None	0.85605	0.79419	0.922728	21.834	21.8718	0.0357852		3.44817	0.0389745	0.224233	true	0.15147	true	3	17			1.30002	0.979566	84.4643			N	N	N	N	N	N
76	D4	false	vec-c	mTAT	UNKNOWN	SYBR	None	0.319025	0.271596	0.374736	20.629	20.5699	0.0393272		1.75929	0.0836349	1.64826	true	0.180587	true	3	15			1.34436	0.975091	85.7506			N	N	N	N	N	N
77	D5	false	vec-c	mTAT	UNKNOWN	SYBR	None	0.319025	0.271596	0.374736	20.496	20.5699	0.0393272		1.75929	0.0836349	1.64826	true	0.180587	true	3	15			1.35035	0.970083	85.7506			N	N	N	N	N	N
78	D6	false	vec-c	mTAT	UNKNOWN	SYBR	None	0.319025	0.271596	0.374736	20.585	20.5699	0.0393272		1.75929	0.0836349	1.64826	true	0.180587	true	3	15			1.3413	0.963364	85.622			N	N	N	N	N	N
82	D10	false	HBx-n	mTAT	UNKNOWN	SYBR	None	0.342114	0.283205	0.413277	20.381	20.3031	0.0734435		1.65848	0.0981946	1.54745	true	0.180587	true	3	15			1.33901	0.960472	85.7506			N	N	N	N	N	N
83	D11	false	HBx-n	mTAT	UNKNOWN	SYBR	None	0.342114	0.283205	0.413277	20.372	20.3031	0.0734435		1.65848	0.0981946	1.54745	true	0.180587	true	3	15			1.34278	0.972503	85.7506			N	N	N	N	N	N
84	D12	false	HBx-n	mTAT	UNKNOWN	SYBR	None	0.342114	0.283205	0.413277	20.156	20.3031	0.0734435		1.65848	0.0981946	1.54745	true	0.180587	true	3	15			1.35257	0.966043	85.7506			N	N	N	N	N	N
88	D16	false	HBx-w10	mTAT	UNKNOWN	SYBR	None	0.677005	0.654908	0.699846	19.112	19.0974	0.00767277		0.673794	0.0172425	0.562763	true	0.180587	true	3	14			1.35954	0.951915	85.7506			N	N	N	N	N	N
89	D17	false	HBx-w10	mTAT	UNKNOWN	SYBR	None	0.677005	0.654908	0.699846	19.095	19.0974	0.00767277		0.673794	0.0172425	0.562763	true	0.180587	true	3	14			1.36014	0.964001	85.7506			N	N	N	N	N	N
90	D18	false	HBx-w10	mTAT	UNKNOWN	SYBR	None	0.677005	0.654908	0.699846	19.085	19.0974	0.00767277		0.673794	0.0172425	0.562763	true	0.180587	true	3	14			1.35743	0.960346	85.7506			N	N	N	N	N	N
100	E4	false	vec-c	mANGPTL6	UNKNOWN	SYBR	None	2.49947	2.10339	2.97013	26.134	26.0559	0.0508804		7.24531	0.0896492	-1.32162	true	0.203563	true	3	21			1.3479	0.970513	88.3231			N	N	N	N	N	N
101	E5	false	vec-c	mANGPTL6	UNKNOWN	SYBR	None	2.49947	2.10339	2.97013	25.96	26.0559	0.0508804		7.24531	0.0896492	-1.32162	true	0.203563	true	3	20			1.34951	0.978334	88.3231			N	N	N	N	N	N
102	E6	false	vec-c	mANGPTL6	UNKNOWN	SYBR	None	2.49947	2.10339	2.97013	26.073	26.0559	0.0508804		7.24531	0.0896492	-1.32162	true	0.203563	true	3	20			1.35048	0.9753	88.3231			N	N	N	N	N	N
106	E10	false	HBx-n	mANGPTL6	UNKNOWN	SYBR	None	1.13518	0.926745	1.39049	27.192	27.0286	0.0828478		8.38401	0.105413	-0.182919	true	0.203563	true	3	22			1.35402	0.961226	88.5804			N	N	N	N	N	N
107	E11	false	HBx-n	mANGPTL6	UNKNOWN	SYBR	None	1.13518	0.926745	1.39049	26.973	27.0286	0.0828478		8.38401	0.105413	-0.182919	true	0.203563	true	3	21			1.34998	0.977378	88.5804			N	N	N	N	N	N
108	E12	false	HBx-n	mANGPTL6	UNKNOWN	SYBR	None	1.13518	0.926745	1.39049	26.922	27.0286	0.0828478		8.38401	0.105413	-0.182919	true	0.203563	true	3	21			1.35195	0.969155	88.5804			N	N	N	N	N	N
112	E16	false	HBx-w10	mANGPTL6	UNKNOWN	SYBR	None	1.48508	1.28994	1.70975	26.346	26.42	0.0715536		7.99638	0.0732008	-0.570545	true	0.203563	true	3	21			1.35716	0.97493	88.4518			N	N	N	N	N	N
113	E17	false	HBx-w10	mANGPTL6	UNKNOWN	SYBR	None	1.48508	1.28994	1.70975	26.351	26.42	0.0715536		7.99638	0.0732008	-0.570545	true	0.203563	true	3	21			1.35518	0.969813	88.4518			N	N	N	N	N	N
114	E18	false	HBx-w10	mANGPTL6	UNKNOWN	SYBR	None	1.48508	1.28994	1.70975	26.563	26.42	0.0715536		7.99638	0.0732008	-0.570545	true	0.203563	true	3	21			1.35756	0.972684	88.4518			N	N	N	N	N	N
124	F4	false	vec-c	mMAGEA6	UNKNOWN	SYBR	None				Undetermined							true	0.04	true	3	39			0	0	61.3113			N	Y	N	Y	Y	N
125	F5	false	vec-c	mMAGEA6	UNKNOWN	SYBR	None				Undetermined							true	0.04	true	3	39			0	0	61.4399			N	Y	N	Y	Y	N
126	F6	false	vec-c	mMAGEA6	UNKNOWN	SYBR	None				Undetermined							true	0.04	true	3	39			0	0	61.3113			N	Y	N	Y	Y	N
130	F10	false	HBx-n	mMAGEA6	UNKNOWN	SYBR	None				Undetermined							true	0.04	true	3	39			0	0	61.3113	88.1945	83.4353	Y	Y	N	Y	Y	N
131	F11	false	HBx-n	mMAGEA6	UNKNOWN	SYBR	None				Undetermined							true	0.04	true	3	39			0	0	61.3113			N	Y	N	Y	Y	N
132	F12	false	HBx-n	mMAGEA6	UNKNOWN	SYBR	None				Undetermined							true	0.04	true	3	39			0	0	61.3113			N	Y	N	Y	Y	N
136	F16	false	HBx-w10	mMAGEA6	UNKNOWN	SYBR	None				Undetermined							true	0.04	true	3	39			0	0	61.3113			N	Y	N	Y	Y	N
137	F17	false	HBx-w10	mMAGEA6	UNKNOWN	SYBR	None				Undetermined							true	0.04	true	3	39			0	0	61.3113			N	Y	N	Y	Y	N
138	F18	false	HBx-w10	mMAGEA6	UNKNOWN	SYBR	None				Undetermined							true	0.04	true	3	39			0	0	61.3113			N	Y	N	N	Y	N
148	G4	false	vec-c	mGNAL	UNKNOWN	SYBR	None	0.920503	0.487762	1.73717	31.699	31.4155	0.321646		12.6049	0.330006	0.119505	true	0.17384	true	3	26			1.37196	0.976214	83.0494			N	N	Y	N	N	N
149	G5	false	vec-c	mGNAL	UNKNOWN	SYBR	None	0.920503	0.487762	1.73717	31.774	31.4155	0.321646		12.6049	0.330006	0.119505	true	0.17384	true	3	26			1.37658	0.975728	83.0494			N	N	Y	N	N	N
150	G6	false	vec-c	mGNAL	UNKNOWN	SYBR	None	0.920503	0.487762	1.73717	30.774	31.4155	0.321646		12.6049	0.330006	0.119505	true	0.17384	true	3	25			1.38461	0.979249	83.0494			N	N	Y	N	N	N
154	G10	false	HBx-n	mGNAL	UNKNOWN	SYBR	None	0.894086	0.247188	3.23394	31.929	31.2916	0.664864		12.647	0.668051	0.161515	true	0.17384	true	3	26			1.37778	0.971642	83.0494			N	N	Y	N	N	N
155	G11	false	HBx-n	mGNAL	UNKNOWN	SYBR	None	0.894086	0.247188	3.23394	31.984	31.2916	0.664864		12.647	0.668051	0.161515	true	0.17384	true	3	27			1.37522	0.960567	83.0494			N	N	Y	N	N	N
156	G12	false	HBx-n	mGNAL	UNKNOWN	SYBR	None	0.894086	0.247188	3.23394	29.962	31.2916	0.664864		12.647	0.668051	0.161515	true	0.17384	true	3	25			1.35299	0.973893	83.0494	76.3607		Y	N	Y	N	N	Y
160	G16	false	HBx-w10	mGNAL	UNKNOWN	SYBR	None	1.19587	0.67867	2.10721	30.277	30.651	0.293955		12.2274	0.29436	-0.258058	true	0.17384	true	3	25			1.38282	0.979523	83.0494			N	N	Y	N	N	N
161	G17	false	HBx-w10	mGNAL	UNKNOWN	SYBR	None	1.19587	0.67867	2.10721	30.445	30.651	0.293955		12.2274	0.29436	-0.258058	true	0.17384	true	3	25			1.38186	0.973028	83.0494			N	N	Y	N	N	N
162	G18	false	HBx-w10	mGNAL	UNKNOWN	SYBR	None	1.19587	0.67867	2.10721	31.231	30.651	0.293955		12.2274	0.29436	-0.258058	true	0.17384	true	3	26			1.3812	0.97498	83.0494			N	N	Y	N	N	N
172	H4	false	vec-c	mRGS5	UNKNOWN	SYBR	None	2.77813	2.07498	3.71957	23.633	23.5689	0.132462		4.75832	0.151639	-1.47412	true	0.120512	true	3	19			1.34827	0.971484	86.2651			N	N	N	N	N	N
173	H5	false	vec-c	mRGS5	UNKNOWN	SYBR	None	2.77813	2.07498	3.71957	23.76	23.5689	0.132462		4.75832	0.151639	-1.47412	true	0.120512	true	3	19			1.22227	0.990398	86.1365			N	N	N	N	N	N
174	H6	false	vec-c	mRGS5	UNKNOWN	SYBR	None	2.77813	2.07498	3.71957	23.314	23.5689	0.132462		4.75832	0.151639	-1.47412	true	0.120512	true	3	19			1.35848	0.963721	86.2651			N	N	N	N	N	N
178	H10	false	HBx-n	mRGS5	UNKNOWN	SYBR	None	0.615715	0.518901	0.730592	25.456	25.5767	0.0604446		6.9321	0.088892	0.699666	true	0.120512	true	3	21			1.35491	0.961126	86.2651			N	N	N	N	N	N
179	H11	false	HBx-n	mRGS5	UNKNOWN	SYBR	None	0.615715	0.518901	0.730592	25.635	25.5767	0.0604446		6.9321	0.088892	0.699666	true	0.120512	true	3	21			1.35692	0.97269	86.2651			N	N	N	N	N	N
180	H12	false	HBx-n	mRGS5	UNKNOWN	SYBR	None	0.615715	0.518901	0.730592	25.639	25.5767	0.0604446		6.9321	0.088892	0.699666	true	0.120512	true	3	21			1.35319	0.963344	86.2651			N	N	N	N	N	N
184	H16	false	HBx-w10	mRGS5	UNKNOWN	SYBR	None	1.63151	1.39886	1.90285	24.107	23.9499	0.0784367		5.52623	0.0799421	-0.70621	true	0.120512	true	3	19			1.35963	0.963642	86.2651			N	N	N	N	N	N
185	H17	false	HBx-w10	mRGS5	UNKNOWN	SYBR	None	1.63151	1.39886	1.90285	23.869	23.9499	0.0784367		5.52623	0.0799421	-0.70621	true	0.120512	true	3	19			1.36309	0.974124	86.2651			N	N	N	N	N	N
186	H18	false	HBx-w10	mRGS5	UNKNOWN	SYBR	None	1.63151	1.39886	1.90285	23.873	23.9499	0.0784367		5.52623	0.0799421	-0.70621	true	0.120512	true	3	19			1.3642	0.975272	86.2651			N	N	N	N	N	N
196	I4	false	vec-c	mFAM110C	UNKNOWN	SYBR	None	3.64461	3.15341	4.21232	28.638	28.6667	0.0144986		9.85607	0.0752222	-1.86577	true	0.212711	true	3	23			1.35501	0.969281	90.5098			N	N	N	N	N	N
197	I5	false	vec-c	mFAM110C	UNKNOWN	SYBR	None	3.64461	3.15341	4.21232	28.676	28.6667	0.0144986		9.85607	0.0752222	-1.86577	true	0.212711	true	3	23			1.35918	0.976819	90.5098			N	N	N	N	N	N
198	I6	false	vec-c	mFAM110C	UNKNOWN	SYBR	None	3.64461	3.15341	4.21232	28.686	28.6667	0.0144986		9.85607	0.0752222	-1.86577	true	0.212711	true	3	23			1.36167	0.965795	90.5098			N	N	N	N	N	N
202	I10	false	HBx-n	mFAM110C	UNKNOWN	SYBR	None	1.85583	1.32345	2.60236	29.195	29.4744	0.163138		10.8298	0.175677	-0.892061	true	0.212711	true	3	24			1.35434	0.965052	90.5098			N	N	N	N	N	N
203	I11	false	HBx-n	mFAM110C	UNKNOWN	SYBR	None	1.85583	1.32345	2.60236	29.76	29.4744	0.163138		10.8298	0.175677	-0.892061	true	0.212711	true	3	24			1.35782	0.963774	90.5098			N	N	N	N	N	N
204	I12	false	HBx-n	mFAM110C	UNKNOWN	SYBR	None	1.85583	1.32345	2.60236	29.468	29.4744	0.163138		10.8298	0.175677	-0.892061	true	0.212711	true	3	24			1.35299	0.958029	90.5098			N	N	N	N	N	N
208	I16	false	HBx-w10	mFAM110C	UNKNOWN	SYBR	None	0.981149	0.640228	1.50361	29.888	30.1729	0.221288		11.7493	0.221826	0.0274556	true	0.212711	true	3	24			1.35997	0.968393	90.5098			N	N	N	N	N	N
209	I17	false	HBx-w10	mFAM110C	UNKNOWN	SYBR	None	0.981149	0.640228	1.50361	30.609	30.1729	0.221288		11.7493	0.221826	0.0274556	true	0.212711	true	3	25			1.35942	0.97102	90.5098			N	N	N	N	N	N
210	I18	false	HBx-w10	mFAM110C	UNKNOWN	SYBR	None	0.981149	0.640228	1.50361	30.022	30.1729	0.221288		11.7493	0.221826	0.0274556	true	0.212711	true	3	24			1.365	0.967529	90.5098			N	N	N	N	N	N
220	J4	false	vec-c	HBx	UNKNOWN	SYBR	None	0.0937975	0.0477776	0.184144	34.712	34.2462	0.342666		15.4356	0.350526	3.41431	true	0.0960351	true	3	30			1.33469	0.961103	81.2486			N	N	Y	N	N	N
221	J5	false	vec-c	HBx	UNKNOWN	SYBR	None	0.0937975	0.0477776	0.184144	34.449	34.2462	0.342666		15.4356	0.350526	3.41431	true	0.0960351	true	3	30			1.34303	0.972061	81.2486			N	N	Y	N	N	N
222	J6	false	vec-c	HBx	UNKNOWN	SYBR	None	0.0937975	0.0477776	0.184144	33.578	34.2462	0.342666		15.4356	0.350526	3.41431	true	0.0960351	true	3	29			1.35029	0.970098	81.2486			N	N	Y	N	N	N
226	J10	false	HBx-n	HBx	UNKNOWN	SYBR	None	20381.9	17731.8	23428	16.408	16.3509	0.0314652		-2.29369	0.072376	-14.315	true	0.0960351	true	3	12			1.3533	0.96816	81.5059			N	N	N	N	N	N
227	J11	false	HBx-n	HBx	UNKNOWN	SYBR	None	20381.9	17731.8	23428	16.299	16.3509	0.0314652		-2.29369	0.072376	-14.315	true	0.0960351	true	3	12			1.35633	0.966446	81.5059			N	N	N	N	N	N
228	J12	false	HBx-n	HBx	UNKNOWN	SYBR	None	20381.9	17731.8	23428	16.346	16.3509	0.0314652		-2.29369	0.072376	-14.315	true	0.0960351	true	3	12			1.35618	0.968456	81.5059			N	N	N	N	N	N
232	J16	false	HBx-w10	HBx	UNKNOWN	SYBR	None	2728.81	2480.92	3001.47	19.125	19.0309	0.0470159		0.607255	0.0494866	-11.4141	true	0.0960351	true	3	15			1.3649	0.955219	81.5059			N	N	N	N	N	N
233	J17	false	HBx-w10	HBx	UNKNOWN	SYBR	None	2728.81	2480.92	3001.47	18.981	19.0309	0.0470159		0.607255	0.0494866	-11.4141	true	0.0960351	true	3	15			1.36177	0.965921	81.3772			N	N	N	N	N	N
234	J18	false	HBx-w10	HBx	UNKNOWN	SYBR	None	2728.81	2480.92	3001.47	18.987	19.0309	0.0470159		0.607255	0.0494866	-11.4141	true	0.0960351	true	3	15			1.36626	0.970844	81.3772			N	N	N	N	N	N
244	K4	false	vec-c	mARG1	UNKNOWN	SYBR	None	0.815112	0.695419	0.955406	17.959	17.9429	0.0368995		-0.867645	0.0825211	0.29493	true	0.133785	true	3	13			1.32547	0.973154	84.207			N	N	N	N	N	N
245	K5	false	vec-c	mARG1	UNKNOWN	SYBR	None	0.815112	0.695419	0.955406	17.873	17.9429	0.0368995		-0.867645	0.0825211	0.29493	true	0.133785	true	3	13			1.323	0.968005	84.207			N	N	N	N	N	N
246	K6	false	vec-c	mARG1	UNKNOWN	SYBR	None	0.815112	0.695419	0.955406	17.998	17.9429	0.0368995		-0.867645	0.0825211	0.29493	true	0.133785	true	3	13			1.32939	0.961436	84.207			N	N	N	N	N	N
250	K10	false	HBx-n	mARG1	UNKNOWN	SYBR	None	0.826259	0.653919	1.04402	17.562	17.7574	0.102599		-0.887241	0.121552	0.275334	true	0.133785	true	3	13			1.32649	0.964487	84.207			N	N	N	N	N	N
251	K11	false	HBx-n	mARG1	UNKNOWN	SYBR	None	0.826259	0.653919	1.04402	17.909	17.7574	0.102599		-0.887241	0.121552	0.275334	true	0.133785	true	3	13			1.32822	0.968922	84.207			N	N	N	N	N	N
252	K12	false	HBx-n	mARG1	UNKNOWN	SYBR	None	0.826259	0.653919	1.04402	17.802	17.7574	0.102599		-0.887241	0.121552	0.275334	true	0.133785	true	3	13			1.3285	0.970054	84.207			N	N	N	N	N	N
256	K16	false	HBx-w10	mARG1	UNKNOWN	SYBR	None	0.811567	0.751934	0.87593	17.634	17.5623	0.0365271		-0.861357	0.0396568	0.301217	true	0.133785	true	3	13			1.33567	0.962776	84.207			N	N	N	N	N	N
257	K17	false	HBx-w10	mARG1	UNKNOWN	SYBR	None	0.811567	0.751934	0.87593	17.54	17.5623	0.0365271		-0.861357	0.0396568	0.301217	true	0.133785	true	3	13			1.33242	0.965541	84.207			N	N	N	N	N	N
258	K18	false	HBx-w10	mARG1	UNKNOWN	SYBR	None	0.811567	0.751934	0.87593	17.513	17.5623	0.0365271		-0.861357	0.0396568	0.301217	true	0.133785	true	3	13			1.34079	0.979817	84.207			N	N	N	N	N	N
268	L4	false	vec-c	mPALM2	UNKNOWN	SYBR	None	1.16013	0.855691	1.57288	30.084	29.8476	0.139881		11.037	0.158161	-0.214287	true	0.212059	true	3	24			1.37392	0.970317	82.0204			N	N	N	N	N	N
269	L5	false	vec-c	mPALM2	UNKNOWN	SYBR	None	1.16013	0.855691	1.57288	29.6	29.8476	0.139881		11.037	0.158161	-0.214287	true	0.212059	true	3	24			1.37667	0.977567	82.0204			N	N	N	N	N	N
270	L6	false	vec-c	mPALM2	UNKNOWN	SYBR	None	1.16013	0.855691	1.57288	29.86	29.8476	0.139881		11.037	0.158161	-0.214287	true	0.212059	true	3	24			1.37119	0.962369	82.0204			N	N	N	N	N	N
274	L10	false	HBx-n	mPALM2	UNKNOWN	SYBR	None	1.37325	1.15648	1.63065	29.32	29.4383	0.0610002		10.7937	0.0892707	-0.45759	true	0.212059	true	3	24			1.37098	0.979243	82.2776			N	N	N	N	N	N
275	L11	false	HBx-n	mPALM2	UNKNOWN	SYBR	None	1.37325	1.15648	1.63065	29.47	29.4383	0.0610002		10.7937	0.0892707	-0.45759	true	0.212059	true	3	24			1.36892	0.966083	82.4062			N	N	N	N	N	N
276	L12	false	HBx-n	mPALM2	UNKNOWN	SYBR	None	1.37325	1.15648	1.63065	29.524	29.4383	0.0610002		10.7937	0.0892707	-0.45759	true	0.212059	true	3	24			1.37145	0.971414	82.4062			N	N	N	N	N	N
280	L16	false	HBx-w10	mPALM2	UNKNOWN	SYBR	None	1.39599	1.16769	1.66892	29.017	29.1936	0.0914964		10.77	0.0927903	-0.48129	true	0.212059	true	3	23			1.37724	0.963561	82.2776			N	N	N	N	N	N
281	L17	false	HBx-w10	mPALM2	UNKNOWN	SYBR	None	1.39599	1.16769	1.66892	29.324	29.1936	0.0914964		10.77	0.0927903	-0.48129	true	0.212059	true	3	24			1.36864	0.968858	82.2776			N	N	N	N	N	N
282	L18	false	HBx-w10	mPALM2	UNKNOWN	SYBR	None	1.39599	1.16769	1.66892	29.239	29.1936	0.0914964		10.77	0.0927903	-0.48129	true	0.212059	true	3	24			1.3821	0.970948	82.2776			N	N	N	N	N	N
292	M4	false	vec-c	mC8A	UNKNOWN	SYBR	None	0.394086	0.337152	0.460636	22.495	22.4408	0.0335535		3.6302	0.0810802	1.34342	true	0.189122	true	3	17			1.33685	0.943549	83.6925			N	N	N	N	N	N
293	M5	false	vec-c	mC8A	UNKNOWN	SYBR	None	0.394086	0.337152	0.460636	22.379	22.4408	0.0335535		3.6302	0.0810802	1.34342	true	0.189122	true	3	17			1.33925	0.965657	83.6925			N	N	N	N	N	N
294	M6	false	vec-c	mC8A	UNKNOWN	SYBR	None	0.394086	0.337152	0.460636	22.448	22.4408	0.0335535		3.6302	0.0810802	1.34342	true	0.189122	true	3	17			1.34057	0.967182	83.6925			N	N	N	N	N	N
298	M10	false	HBx-n	mC8A	UNKNOWN	SYBR	None	0.646374	0.564726	0.739827	21.548	21.5609	0.0259881		2.91635	0.0701685	0.629559	true	0.189122	true	3	16			1.34565	0.972016	83.6925			N	N	N	N	N	N
299	M11	false	HBx-n	mC8A	UNKNOWN	SYBR	None	0.646374	0.564726	0.739827	21.611	21.5609	0.0259881		2.91635	0.0701685	0.629559	true	0.189122	true	3	16			1.33901	0.97073	83.6925			N	N	N	N	N	N
300	M12	false	HBx-n	mC8A	UNKNOWN	SYBR	None	0.646374	0.564726	0.739827	21.524	21.5609	0.0259881		2.91635	0.0701685	0.629559	true	0.189122	true	3	16			1.34847	0.971605	83.6925			N	N	N	N	N	N
304	M16	false	HBx-w10	mC8A	UNKNOWN	SYBR	None	1.03021	0.953273	1.11336	20.739	20.6675	0.0372584		2.24385	0.0403314	-0.0429395	true	0.189122	true	3	16			1.34064	0.956893	83.6925			N	N	N	N	N	N
305	M17	false	HBx-w10	mC8A	UNKNOWN	SYBR	None	1.03021	0.953273	1.11336	20.613	20.6675	0.0372584		2.24385	0.0403314	-0.0429395	true	0.189122	true	3	15			1.34695	0.965718	83.6925			N	N	N	N	N	N
306	M18	false	HBx-w10	mC8A	UNKNOWN	SYBR	None	1.03021	0.953273	1.11336	20.65	20.6675	0.0372584		2.24385	0.0403314	-0.0429395	true	0.189122	true	3	15			1.3446	0.958998	83.6925			N	N	N	N	N	N
316	N4	false	vec-c	mCPEB3	UNKNOWN	SYBR	None	1.30112	1.09587	1.5448	26.974	27.012	0.0500926		8.20139	0.0892044	-0.379753	true	0.211729	true	3	21			1.36021	0.964969	93.7255			N	N	N	N	N	N
317	N5	false	vec-c	mCPEB3	UNKNOWN	SYBR	None	1.30112	1.09587	1.5448	26.95	27.012	0.0500926		8.20139	0.0892044	-0.379753	true	0.211729	true	3	21			1.3614	0.96257	93.7255			N	N	N	N	N	N
318	N6	false	vec-c	mCPEB3	UNKNOWN	SYBR	None	1.30112	1.09587	1.5448	27.111	27.012	0.0500926		8.20139	0.0892044	-0.379753	true	0.211729	true	3	21			1.36212	0.961715	93.7255			N	N	N	N	N	N
322	N10	false	HBx-n	mCPEB3	UNKNOWN	SYBR	None	1.33136	1.12959	1.56917	26.708	26.8128	0.0551775		8.16825	0.0853978	-0.412898	true	0.211729	true	3	21			1.36169	0.972084	93.7255			N	N	N	N	N	N
323	N11	false	HBx-n	mCPEB3	UNKNOWN	SYBR	None	1.33136	1.12959	1.56917	26.836	26.8128	0.0551775		8.16825	0.0853978	-0.412898	true	0.211729	true	3	21			1.35792	0.968261	93.7255			N	N	N	N	N	N
324	N12	false	HBx-n	mCPEB3	UNKNOWN	SYBR	None	1.33136	1.12959	1.56917	26.895	26.8128	0.0551775		8.16825	0.0853978	-0.412898	true	0.211729	true	3	21			1.35854	0.968176	93.7255			N	N	N	N	N	N
328	N16	false	HBx-w10	mCPEB3	UNKNOWN	SYBR	None	1.0384	0.991636	1.08737	26.916	26.9504	0.0183011		8.52678	0.023945	-0.0543652	true	0.211729	true	3	21			1.36226	0.967246	93.7255			N	N	N	N	N	N
329	N17	false	HBx-w10	mCPEB3	UNKNOWN	SYBR	None	1.0384	0.991636	1.08737	26.957	26.9504	0.0183011		8.52678	0.023945	-0.0543652	true	0.211729	true	3	21			1.36297	0.969032	93.7255			N	N	N	N	N	N
330	N18	false	HBx-w10	mCPEB3	UNKNOWN	SYBR	None	1.0384	0.991636	1.08737	26.978	26.9504	0.0183011		8.52678	0.023945	-0.0543652	true	0.211729	true	3	21			1.36373	0.964881	93.5969			N	N	N	N	N	N
Analysis Type	Singleplex
Endogenous Control	mCYC
RQ Min/Max Confidence Level	95.0
Reference Sample	vec-w9

## Sheet: Melt Curve Raw Data
Block Type	384-Well Block
Calibration Background is expired	Yes
Calibration Background performed on	10-12-2018 11:47:46 PDT
Calibration FAM is expired	Yes
Calibration FAM performed on	10-23-2018 10:23:19 PDT
Calibration MELTDOCTOR is expired	Yes
Calibration MELTDOCTOR performed on	09-26-2017 21:22:46 PDT
Calibration NED is expired	Yes
Calibration NED performed on	10-23-2018 10:33:14 PDT
Calibration ROI is expired	Yes
Calibration ROI performed on	10-12-2018 09:37:21 PDT
Calibration ROX is expired	Yes
Calibration ROX performed on	10-23-2018 10:07:21 PDT
Calibration SYBR is expired	Yes
Calibration SYBR performed on	10-23-2018 09:57:53 PDT
Calibration TAMRA is expired	Yes
Calibration TAMRA performed on	10-23-2018 10:45:25 PDT
Calibration Uniformity is expired	Yes
Calibration Uniformity performed on	10-12-2018 10:06:59 PDT
Calibration VIC is expired	Yes
Calibration VIC performed on	10-23-2018 10:54:25 PDT
Chemistry	SYBR_GREEN
Date Created	02-03-2021 22:18:32 PST
Experiment File Name	D:\NZZ\2021-02-03 203555.eds
Experiment Name	2021-02-03 203555
Experiment Run End Time	02-03-2021 15:13:12 PST
Experiment Type	Comparative Cт (ΔΔCт)
Instrument Name	285880860
Instrument Serial Number	285880860
Instrument Type	QuantStudio 12K Flex
Passive Reference	ROX
Quantification Cycle Method	Ct
Signal Smoothing On	true
Stage/ Cycle where Analysis is performed	Stage 2, Step 2
Well	Well Position	Reading	Temperature	Fluorescence	Derivative
1	A1	1	60.1536	1.896	0.0832211
1	A1	2	60.4109	1.89085	0.0832792
1	A1	3	60.6681	1.88128	0.0833144
1	A1	4	60.9254	1.87247	0.0832536
1	A1	5	61.1826	1.86154	0.0830757
1	A1	6	61.4399	1.84933	0.0828502
1	A1	7	61.6971	1.83629	0.0827271
1	A1	8	61.9544	1.83283	0.0828667
1	A1	9	62.2116	1.82093	0.0833526
1	A1	10	62.4689	1.80825	0.0841463
1	A1	11	62.7262	1.79976	0.0851087
1	A1	12	62.9834	1.78827	0.0860605
1	A1	13	63.2407	1.77648	0.0868456
1	A1	14	63.4979	1.76465	0.0873551
1	A1	15	63.7552	1.75652	0.0875274
1	A1	16	64.0124	1.74361	0.0873423
1	A1	17	64.2697	1.72904	0.0868294
1	A1	18	64.527	1.72497	0.0860678
1	A1	19	64.7842	1.70715	0.0851721
1	A1	20	65.0415	1.70187	0.0842371
1	A1	21	65.2987	1.68724	0.0832911
1	A1	22	65.556	1.68249	0.0822772
1	A1	23	65.8132	1.6703	0.0811082
1	A1	24	66.0705	1.65666	0.0797561
1	A1	25	66.3277	1.64571	0.0783009
1	A1	26	66.585	1.63956	0.0768923
1	A1	27	66.8423	1.62981	0.0756455
1	A1	28	67.0995	1.6233	0.0745682
1	A1	29	67.3568	1.61184	0.0736001
1	A1	30	67.614	1.59824	0.0727267
1	A1	31	67.8713	1.59291	0.0720675
1	A1	32	68.1285	1.58203	0.0718269
1	A1	33	68.3858	1.57702	0.072135
1	A1	34	68.6431	1.56971	0.0728927
1	A1	35	68.9003	1.5587	0.0737491
1	A1	36	69.1576	1.54991	0.0742348
1	A1	37	69.4148	1.5346	0.0739585
1	A1	38	69.6721	1.52737	0.072745
1	A1	39	69.9293	1.51915	0.0706493
1	A1	40	70.1866	1.51043	0.067888
1	A1	41	70.4438	1.49959	0.0647624
1	A1	42	70.7011	1.49313	0.0616234
1	A1	43	70.9584	1.48431	0.0588531
1	A1	44	71.2156	1.47928	0.0568371
1	A1	45	71.4729	1.47555	0.0558996
1	A1	46	71.7301	1.46449	0.056227
1	A1	47	71.9874	1.46071	0.0577974
1	A1	48	72.2446	1.45678	0.0603503
1	A1	49	72.5019	1.44564	0.0634283
1	A1	50	72.7591	1.43946	0.066494
1	A1	51	73.0164	1.42801	0.069099
1	A1	52	73.2737	1.4165	0.0710336
1	A1	53	73.5309	1.40913	0.0723767
1	A1	54	73.7882	1.40042	0.0734253
1	A1	55	74.0454	1.38884	0.074528
1	A1	56	74.3027	1.38412	0.0759069
1	A1	57	74.5599	1.37362	0.0775478
1	A1	58	74.8172	1.36065	0.0792068
1	A1	59	75.0745	1.35377	0.0805375
1	A1	60	75.3317	1.34319	0.0812819
1	A1	61	75.589	1.32404	0.0814308
1	A1	62	75.8462	1.31946	0.0812514
1	A1	63	76.1035	1.30879	0.0811545
1	A1	64	76.3607	1.30128	0.0814659
1	A1	65	76.618	1.29482	0.0822455
1	A1	66	76.8752	1.27939	0.0832732
1	A1	67	77.1325	1.2674	0.0841954
1	A1	68	77.3898	1.25641	0.0847079
1	A1	69	77.647	1.24752	0.0846703
1	A1	70	77.9043	1.23707	0.0841094
1	A1	71	78.1615	1.22592	0.0831739
1	A1	72	78.4188	1.21213	0.0820831
1	A1	73	78.676	1.20541	0.0810891
1	A1	74	78.9333	1.19474	0.0804254
1	A1	75	79.1906	1.18746	0.0802441
1	A1	76	79.4478	1.17549	0.0805769
1	A1	77	79.7051	1.16709	0.0813556
1	A1	78	79.9623	1.15245	0.082482
1	A1	79	80.2196	1.14775	0.0839082
1	A1	80	80.4768	1.13353	0.0856799
1	A1	81	80.7341	1.12228	0.0879212
1	A1	82	80.9913	1.11333	0.0907747
1	A1	83	81.2486	1.10288	0.0943171
1	A1	84	81.5059	1.0903	0.0984992
1	A1	85	81.7631	1.07595	0.103157
1	A1	86	82.0204	1.06625	0.108141
1	A1	87	82.2776	1.04791	0.113597
1	A1	88	82.5349	1.03382	0.12038
1	A1	89	82.7921	1.01635	0.13052
1	A1	90	83.0494	1.00171	0.14755
1	A1	91	83.3066	0.98771	0.176407
1	A1	92	83.5639	0.976046	0.222577
1	A1	93	83.8212	0.957033	0.290303
1	A1	94	84.0784	0.93582	0.380044
1	A1	95	84.3357	0.904848	0.486042
1	A1	96	84.5929	0.848662	0.595332
1	A1	97	84.8502	0.734074	0.689438
1	A1	98	85.1074	0.573416	0.748964
1	A1	99	85.3647	0.401757	0.759676
1	A1	100	85.622	0.25875	0.717511
1	A1	101	85.8792	0.159256	0.630136
1	A1	102	86.1365	0.111288	0.514275
1	A1	103	86.3937	0.0948228	0.390108
1	A1	104	86.651	0.0882658	0.27533
1	A1	105	86.9082	0.0863312	0.181215
1	A1	106	87.1655	0.0828524	0.111706
1	A1	107	87.4227	0.082343	0.0649881
1	A1	108	87.68	0.0814147	0.0361613
1	A1	109	87.9373	0.0809598	0.0196805
1	A1	110	88.1945	0.0807016	0.0108567
1	A1	111	88.4518	0.0812708	0.00637737
1	A1	112	88.709	0.0799289	0.00419114
1	A1	113	88.9663	0.0800473	0.00314692
1	A1	114	89.2235	0.0794452	0.00264489
1	A1	115	89.4808	0.0798153	0.00239362
1	A1	116	89.7381	0.0786564	0.00226733
1	A1	117	89.9953	0.0790518	0.00222507
1	A1	118	90.2526	0.0788485	0.00226084
1	A1	119	90.5098	0.0783222	0.00237014
1	A1	120	90.7671	0.0784052	0.00252988
1	A1	121	91.0243	0.0775964	0.00269239
1	A1	122	91.2816	0.0771257	0.00279457
1	A1	123	91.5388	0.0771717	0.00277852
1	A1	124	91.7961	0.0757159	0.0026166
1	A1	125	92.0534	0.0760954	0.00232936
1	A1	126	92.3106	0.0756524	0.00198543
1	A1	127	92.5679	0.0758735	0.00167901
1	A1	128	92.8251	0.0763448	0.00149129
1	A1	129	93.0824	0.0756609	0.00145468
1	A1	130	93.3396	0.0756053	0.00153732
1	A1	131	93.5969	0.0752353	0.00165737
1	A1	132	93.8542	0.0751886	0.00171939
1	A1	133	94.1114	0.0735441	0.00165523
1	A1	134	94.3687	0.0746929	0.00144969
1	A1	135	94.6259	0.0741706	0.00114059
1	A1	136	94.8832	0.074167	0.000796094
2	A2	1	60.1536	1.89063	0.0830305
2	A2	2	60.4109	1.87432	0.0831297
2	A2	3	60.6681	1.8701	0.0833741
2	A2	4	60.9254	1.85903	0.0838144
2	A2	5	61.1826	1.85211	0.0844437
2	A2	6	61.4399	1.83728	0.0851678
2	A2	7	61.6971	1.8291	0.0858232
2	A2	8	61.9544	1.81634	0.0862575
2	A2	9	62.2116	1.80161	0.086388
2	A2	10	62.4689	1.79339	0.086225
2	A2	11	62.7262	1.78716	0.0858351
2	A2	12	62.9834	1.76647	0.0853011
2	A2	13	63.2407	1.76174	0.0846926
2	A2	14	63.4979	1.75036	0.0840444
2	A2	15	63.7552	1.73556	0.0833392
2	A2	16	64.0124	1.73157	0.0825185
2	A2	17	64.2697	1.71928	0.0815324
2	A2	18	64.527	1.70347	0.0804103
2	A2	19	64.7842	1.69422	0.0793008
2	A2	20	65.0415	1.68901	0.0784235
2	A2	21	65.2987	1.67733	0.0779545
2	A2	22	65.556	1.66739	0.0779233
2	A2	23	65.8132	1.66072	0.0781873
2	A2	24	66.0705	1.64762	0.0785052
2	A2	25	66.3277	1.63508	0.0786444
2	A2	26	66.585	1.6285	0.0784616
2	A2	27	66.8423	1.61653	0.0779313
2	A2	28	67.0995	1.60698	0.0771276
2	A2	29	67.3568	1.59649	0.0761836
2	A2	30	67.614	1.5858	0.0752354
2	A2	31	67.8713	1.57698	0.0743646
2	A2	32	68.1285	1.57184	0.0735603
2	A2	33	68.3858	1.55877	0.0727362
2	A2	34	68.6431	1.55015	0.0718006
2	A2	35	68.9003	1.53748	0.0707291
2	A2	36	69.1576	1.53105	0.0695708
2	A2	37	69.4148	1.52485	0.0683888
2	A2	38	69.6721	1.51304	0.0671719
2	A2	39	69.9293	1.50645	0.0658119
2	A2	40	70.1866	1.49687	0.0641638
2	A2	41	70.4438	1.48765	0.0621598
2	A2	42	70.7011	1.47861	0.0599046
2	A2	43	70.9584	1.47211	0.0576959
2	A2	44	71.2156	1.46607	0.0559468
2	A2	45	71.4729	1.45748	0.0550582
2	A2	46	71.7301	1.45644	0.0552862
2	A2	47	71.9874	1.44545	0.0566678
2	A2	48	72.2446	1.44223	0.0590228
2	A2	49	72.5019	1.43215	0.0620244
2	A2	50	72.7591	1.42419	0.0652899
2	A2	51	73.0164	1.41509	0.0684613
2	A2	52	73.2737	1.40675	0.0712472
2	A2	53	73.5309	1.39477	0.0734307
2	A2	54	73.7882	1.38736	0.0748781
2	A2	55	74.0454	1.37539	0.0755494
2	A2	56	74.3027	1.36347	0.0755318
2	A2	57	74.5599	1.35696	0.0750524
2	A2	58	74.8172	1.34381	0.0744556
2	A2	59	75.0745	1.33471	0.0741165
2	A2	60	75.3317	1.32948	0.0743107
2	A2	61	75.589	1.31923	0.0750982
2	A2	62	75.8462	1.3092	0.0762808
2	A2	63	76.1035	1.29995	0.0774767
2	A2	64	76.3607	1.28874	0.0782922
2	A2	65	76.618	1.27735	0.0785057
2	A2	66	76.8752	1.26195	0.0781715
2	A2	67	77.1325	1.25864	0.0775708
2	A2	68	77.3898	1.24793	0.0770569
2	A2	69	77.647	1.23884	0.0768797
2	A2	70	77.9043	1.22949	0.0771065
2	A2	71	78.1615	1.21879	0.077657
2	A2	72	78.4188	1.20781	0.0784078
2	A2	73	78.676	1.19678	0.0792693
2	A2	74	78.9333	1.18951	0.0801923
2	A2	75	79.1906	1.17975	0.0811302
2	A2	76	79.4478	1.16689	0.0820181
2	A2	77	79.7051	1.15484	0.0828026
2	A2	78	79.9623	1.14793	0.0835047
2	A2	79	80.2196	1.13142	0.084253
2	A2	80	80.4768	1.12437	0.0852662
2	A2	81	80.7341	1.11671	0.0867875
2	A2	82	80.9913	1.09944	0.0890207
2	A2	83	81.2486	1.09424	0.0920843
2	A2	84	81.5059	1.07834	0.0959954
2	A2	85	81.7631	1.06692	0.100681
2	A2	86	82.0204	1.05705	0.106059
2	A2	87	82.2776	1.0401	0.112258
2	A2	88	82.5349	1.02477	0.120031
2	A2	89	82.7921	1.00727	0.131291
2	A2	90	83.0494	0.988092	0.149522
2	A2	91	83.3066	0.977485	0.179689
2	A2	92	83.5639	0.962418	0.227294
2	A2	93	83.8212	0.946519	0.296417
2	A2	94	84.0784	0.925804	0.387093
2	A2	95	84.3357	0.88681	0.492981
2	A2	96	84.5929	0.82699	0.600645
2	A2	97	84.8502	0.706588	0.691561
2	A2	98	85.1074	0.541366	0.746842
2	A2	99	85.3647	0.371003	0.753187
2	A2	100	85.622	0.228182	0.707533
2	A2	101	85.8792	0.131258	0.618237
2	A2	102	86.1365	0.085242	0.502186
2	A2	103	86.3937	0.0683688	0.379236
2	A2	104	86.651	0.0622197	0.266488
2	A2	105	86.9082	0.0601743	0.174619
2	A2	106	87.1655	0.0582083	0.107155
2	A2	107	87.4227	0.0562355	0.0620954
2	A2	108	87.68	0.0563993	0.0345276
2	A2	109	87.9373	0.0561399	0.0189756
2	A2	110	88.1945	0.0554246	0.0108222
2	A2	111	88.4518	0.0554562	0.00679746
2	A2	112	88.709	0.0541539	0.00487044
2	A2	113	88.9663	0.0536006	0.0039131
2	A2	114	89.2235	0.0537016	0.00336734
2	A2	115	89.4808	0.0531872	0.00299646
2	A2	116	89.7381	0.0532866	0.00272173
2	A2	117	89.9953	0.0527759	0.00252452
2	A2	118	90.2526	0.0522565	0.00239767
2	A2	119	90.5098	0.0521944	0.00232991
2	A2	120	90.7671	0.0519081	0.00230596
2	A2	121	91.0243	0.0517399	0.00230818
2	A2	122	91.2816	0.0513646	0.002316
2	A2	123	91.5388	0.0507801	0.0023061
2	A2	124	91.7961	0.0506716	0.00225762
2	A2	125	92.0534	0.0503773	0.00216063
2	A2	126	92.3106	0.0497962	0.00202324
2	A2	127	92.5679	0.0501633	0.00187247
2	A2	128	92.8251	0.0493768	0.00174656
2	A2	129	93.0824	0.0496181	0.0016789
2	A2	130	93.3396	0.049725	0.00167857
2	A2	131	93.5969	0.0493639	0.00171754
2	A2	132	93.8542	0.0490433	0.00173583
2	A2	133	94.1114	0.0481006	0.0016676
2	A2	134	94.3687	0.0477671	0.00147607
2	A2	135	94.6259	0.0482705	0.00117525
2	A2	136	94.8832	0.0482024	0.000823686
3	A3	1	60.1536	1.90856	0.083843
3	A3	2	60.4109	1.89603	0.0843985
3	A3	3	60.6681	1.88472	0.0848682
3	A3	4	60.9254	1.87828	0.0851905
3	A3	5	61.1826	1.86421	0.0854168
3	A3	6	61.4399	1.85	0.0856475
3	A3	7	61.6971	1.84891	0.0859356
3	A3	8	61.9544	1.83319	0.0862318
3	A3	9	62.2116	1.81885	0.0864117
3	A3	10	62.4689	1.80965	0.0863597
3	A3	11	62.7262	1.79877	0.0860354
3	A3	12	62.9834	1.78642	0.0854824
3	A3	13	63.2407	1.77657	0.0847955
3	A3	14	63.4979	1.76463	0.084074
3	A3	15	63.7552	1.75468	0.0834078
3	A3	16	64.0124	1.74562	0.0828834
3	A3	17	64.2697	1.7292	0.0825852
3	A3	18	64.527	1.72609	0.082578
3	A3	19	64.7842	1.71146	0.0828645
3	A3	20	65.0415	1.70365	0.083352
3	A3	21	65.2987	1.69136	0.0838538
3	A3	22	65.556	1.6802	0.0841421
3	A3	23	65.8132	1.67186	0.0840299
3	A3	24	66.0705	1.65526	0.0834457
3	A3	25	66.3277	1.64576	0.0824543
3	A3	26	66.585	1.6388	0.0812183
3	A3	27	66.8423	1.62441	0.0799252
3	A3	28	67.0995	1.61689	0.0787165
3	A3	29	67.3568	1.60612	0.077659
3	A3	30	67.614	1.59719	0.0767542
3	A3	31	67.8713	1.58567	0.0759718
3	A3	32	68.1285	1.5769	0.0752708
3	A3	33	68.3858	1.56713	0.0746116
3	A3	34	68.6431	1.55906	0.0739493
3	A3	35	68.9003	1.54895	0.0732356
3	A3	36	69.1576	1.53636	0.0724143
3	A3	37	69.4148	1.53115	0.0714077
3	A3	38	69.6721	1.51879	0.0701114
3	A3	39	69.9293	1.51432	0.0684151
3	A3	40	70.1866	1.50077	0.0662722
3	A3	41	70.4438	1.49121	0.0637772
3	A3	42	70.7011	1.48331	0.0611928
3	A3	43	70.9584	1.47699	0.0588963
3	A3	44	71.2156	1.47457	0.0572673
3	A3	45	71.4729	1.46247	0.0565831
3	A3	46	71.7301	1.45742	0.0569658
3	A3	47	71.9874	1.45051	0.0583766
3	A3	48	72.2446	1.44559	0.0606336
3	A3	49	72.5019	1.43758	0.0634432
3	A3	50	72.7591	1.42455	0.0664615
3	A3	51	73.0164	1.42131	0.0693664
3	A3	52	73.2737	1.40743	0.0719208
3	A3	53	73.5309	1.39728	0.0739954
3	A3	54	73.7882	1.38984	0.0755552
3	A3	55	74.0454	1.38135	0.0766334
3	A3	56	74.3027	1.36451	0.0773172
3	A3	57	74.5599	1.35924	0.0777468
3	A3	58	74.8172	1.34782	0.0780871
3	A3	59	75.0745	1.33656	0.0784753
3	A3	60	75.3317	1.3298	0.0789661
3	A3	61	75.589	1.31912	0.0795154
3	A3	62	75.8462	1.3063	0.0800266
3	A3	63	76.1035	1.29547	0.0804204
3	A3	64	76.3607	1.28602	0.0806873
3	A3	65	76.618	1.2764	0.0808733
3	A3	66	76.8752	1.2659	0.0810246
3	A3	67	77.1325	1.25496	0.0811408
3	A3	68	77.3898	1.24378	0.0811651
3	A3	69	77.647	1.23514	0.0810245
3	A3	70	77.9043	1.22309	0.0806917
3	A3	71	78.1615	1.21135	0.0802342
3	A3	72	78.4188	1.20302	0.0798122
3	A3	73	78.676	1.19112	0.0796224
3	A3	74	78.9333	1.18341	0.0797973
3	A3	75	79.1906	1.17468	0.080341
3	A3	76	79.4478	1.16321	0.0811342
3	A3	77	79.7051	1.1513	0.0820264
3	A3	78	79.9623	1.13744	0.0829452
3	A3	79	80.2196	1.13104	0.0839519
3	A3	80	80.4768	1.11991	0.0852141
3	A3	81	80.7341	1.1084	0.0869307
3	A3	82	80.9913	1.09891	0.0892751
3	A3	83	81.2486	1.08367	0.0923686
3	A3	84	81.5059	1.07466	0.0962642
3	A3	85	81.7631	1.06332	0.100938
3	A3	86	82.0204	1.04823	0.10633
3	A3	87	82.2776	1.03746	0.112551
3	A3	88	82.5349	1.01913	0.120324
3	A3	89	82.7921	0.99845	0.131572
3	A3	90	83.0494	0.983831	0.149895
3	A3	91	83.3066	0.971257	0.180491
3	A3	92	83.5639	0.954679	0.229142
3	A3	93	83.8212	0.941293	0.300088
3	A3	94	84.0784	0.920265	0.393221
3	A3	95	84.3357	0.884113	0.501638
3	A3	96	84.5929	0.8236	0.611045
3	A3	97	84.8502	0.688308	0.70211
3	A3	98	85.1074	0.519227	0.755601
3	A3	99	85.3647	0.348729	0.758566
3	A3	100	85.622	0.208297	0.708867
3	A3	101	85.8792	0.113933	0.615949
3	A3	102	86.1365	0.0697955	0.497507
3	A3	103	86.3937	0.0544015	0.373671
3	A3	104	86.651	0.0493558	0.261305
3	A3	105	86.9082	0.0461734	0.170572
3	A3	106	87.1655	0.0443568	0.104462
3	A3	107	87.4227	0.0427274	0.0605875
3	A3	108	87.68	0.0419113	0.0338504
3	A3	109	87.9373	0.0423767	0.0187553
3	A3	110	88.1945	0.0413024	0.0107654
3	A3	111	88.4518	0.0406837	0.00673396
3	A3	112	88.709	0.0404791	0.00475738
3	A3	113	88.9663	0.0397373	0.00380963
3	A3	114	89.2235	0.0404038	0.00338688
3	A3	115	89.4808	0.0394266	0.00324838
3	A3	116	89.7381	0.0390777	0.0032621
3	A3	117	89.9953	0.0386486	0.00333309
3	A3	118	90.2526	0.0380231	0.00338604
3	A3	119	90.5098	0.0371923	0.00337223
3	A3	120	90.7671	0.0371959	0.003277
3	A3	121	91.0243	0.0366474	0.00311512
3	A3	122	91.2816	0.0364751	0.00291638
3	A3	123	91.5388	0.0362093	0.0027113
3	A3	124	91.7961	0.0355319	0.00252555
3	A3	125	92.0534	0.0352482	0.0023815
3	A3	126	92.3106	0.0354934	0.002299
3	A3	127	92.5679	0.0351033	0.00228912
3	A3	128	92.8251	0.0350467	0.00234423
3	A3	129	93.0824	0.0343464	0.00243318
3	A3	130	93.3396	0.0333787	0.00250699
3	A3	131	93.5969	0.0341824	0.00251188
3	A3	132	93.8542	0.0334201	0.00240405
3	A3	133	94.1114	0.032474	0.00216276
3	A3	134	94.3687	0.0322416	0.00180015
3	A3	135	94.6259	0.0324582	0.00136297
3	A3	136	94.8832	0.0327999	0.000920348
4	A4	1	60.1536	1.93264	0.0867138
4	A4	2	60.4109	1.92507	0.0877793
4	A4	3	60.6681	1.91197	0.0886851
4	A4	4	60.9254	1.9014	0.0891395
4	A4	5	61.1826	1.88774	0.0890095
4	A4	6	61.4399	1.87851	0.0883688
4	A4	7	61.6971	1.86594	0.0874492
4	A4	8	61.9544	1.85716	0.0865509
4	A4	9	62.2116	1.84067	0.0859347
4	A4	10	62.4689	1.83696	0.0857429
4	A4	11	62.7262	1.82629	0.0859681
4	A4	12	62.9834	1.81049	0.0864792
4	A4	13	63.2407	1.80306	0.0871028
4	A4	14	63.4979	1.79083	0.0877041
4	A4	15	63.7552	1.77822	0.0882266
4	A4	16	64.0124	1.7665	0.0886697
4	A4	17	64.2697	1.7579	0.0890176
4	A4	18	64.527	1.74713	0.0891933
4	A4	19	64.7842	1.73317	0.0890739
4	A4	20	65.0415	1.72258	0.0885542
4	A4	21	65.2987	1.70912	0.0876172
4	A4	22	65.556	1.69853	0.0863536
4	A4	23	65.8132	1.69054	0.0849236
4	A4	24	66.0705	1.67773	0.0834969
4	A4	25	66.3277	1.6665	0.082198
4	A4	26	66.585	1.65685	0.0810851
4	A4	27	66.8423	1.64879	0.0801485
4	A4	28	67.0995	1.63778	0.079335
4	A4	29	67.3568	1.62644	0.0785796
4	A4	30	67.614	1.61465	0.0778415
4	A4	31	67.8713	1.61008	0.0771252
4	A4	32	68.1285	1.59769	0.0764833
4	A4	33	68.3858	1.58663	0.0759999
4	A4	34	68.6431	1.57634	0.0757551
4	A4	35	68.9003	1.57301	0.0757892
4	A4	36	69.1576	1.55872	0.076074
4	A4	37	69.4148	1.55134	0.0765217
4	A4	38	69.6721	1.53832	0.0770165
4	A4	39	69.9293	1.52987	0.0774534
4	A4	40	70.1866	1.52225	0.0777736
4	A4	41	70.4438	1.5108	0.0779858
4	A4	42	70.7011	1.4972	0.0781643
4	A4	43	70.9584	1.48874	0.0784089
4	A4	44	71.2156	1.48313	0.0787806
4	A4	45	71.4729	1.47131	0.0792377
4	A4	46	71.7301	1.46088	0.0796433
4	A4	47	71.9874	1.45034	0.0798461
4	A4	48	72.2446	1.43529	0.0797743
4	A4	49	72.5019	1.43225	0.0794735
4	A4	50	72.7591	1.41618	0.0790707
4	A4	51	73.0164	1.41083	0.0786992
4	A4	52	73.2737	1.39995	0.0784512
4	A4	53	73.5309	1.38825	0.0783743
4	A4	54	73.7882	1.37818	0.0784925
4	A4	55	74.0454	1.36861	0.0788132
4	A4	56	74.3027	1.36282	0.079313
4	A4	57	74.5599	1.34815	0.0799351
4	A4	58	74.8172	1.33694	0.080601
4	A4	59	75.0745	1.3285	0.081244
4	A4	60	75.3317	1.31885	0.0818162
4	A4	61	75.589	1.30737	0.0822837
4	A4	62	75.8462	1.294	0.0826065
4	A4	63	76.1035	1.28829	0.0827429
4	A4	64	76.3607	1.27536	0.0826693
4	A4	65	76.618	1.26294	0.0824115
4	A4	66	76.8752	1.25448	0.0820607
4	A4	67	77.1325	1.24144	0.081746
4	A4	68	77.3898	1.23562	0.0815719
4	A4	69	77.647	1.22368	0.0815614
4	A4	70	77.9043	1.21295	0.0816437
4	A4	71	78.1615	1.20286	0.0817021
4	A4	72	78.4188	1.19118	0.081655
4	A4	73	78.676	1.18022	0.08151
4	A4	74	78.9333	1.17162	0.0813597
4	A4	75	79.1906	1.16088	0.0813233
4	A4	76	79.4478	1.15077	0.0814793
4	A4	77	79.7051	1.14041	0.0818364
4	A4	78	79.9623	1.13182	0.0823659
4	A4	79	80.2196	1.11777	0.0830757
4	A4	80	80.4768	1.10692	0.0840687
4	A4	81	80.7341	1.0992	0.0855313
4	A4	82	80.9913	1.0869	0.0876449
4	A4	83	81.2486	1.07869	0.0904601
4	A4	84	81.5059	1.06579	0.0938271
4	A4	85	81.7631	1.05329	0.097464
4	A4	86	82.0204	1.04167	0.101198
4	A4	87	82.2776	1.02423	0.105352
4	A4	88	82.5349	1.00779	0.111184
4	A4	89	82.7921	0.997613	0.121271
4	A4	90	83.0494	0.986974	0.139654
4	A4	91	83.3066	0.971506	0.171566
4	A4	92	83.5639	0.959517	0.222443
4	A4	93	83.8212	0.942784	0.296054
4	A4	94	84.0784	0.920713	0.39195
4	A4	95	84.3357	0.886485	0.503127
4	A4	96	84.5929	0.824177	0.615312
4	A4	97	84.8502	0.703746	0.709117
4	A4	98	85.1074	0.519634	0.76507
4	A4	99	85.3647	0.352371	0.769846
4	A4	100	85.622	0.212579	0.720983
4	A4	101	85.8792	0.116396	0.627813
4	A4	102	86.1365	0.0707595	0.508167
4	A4	103	86.3937	0.0544465	0.382492
4	A4	104	86.651	0.048667	0.268039
4	A4	105	86.9082	0.046004	0.175317
4	A4	106	87.1655	0.0440545	0.107555
4	A4	107	87.4227	0.0425619	0.0624782
4	A4	108	87.68	0.0419245	0.0349795
4	A4	109	87.9373	0.0422746	0.0194686
4	A4	110	88.1945	0.0409119	0.0112721
4	A4	111	88.4518	0.0403264	0.00710842
4	A4	112	88.709	0.0396463	0.00496898
4	A4	113	88.9663	0.0396357	0.00376814
4	A4	114	89.2235	0.039575	0.00299101
4	A4	115	89.4808	0.0388016	0.00243208
4	A4	116	89.7381	0.0390639	0.00203221
4	A4	117	89.9953	0.0386896	0.00178781
4	A4	118	90.2526	0.0387284	0.00170191
4	A4	119	90.5098	0.0389689	0.00175733
4	A4	120	90.7671	0.0386214	0.00190624
4	A4	121	91.0243	0.0373561	0.00207815
4	A4	122	91.2816	0.0378349	0.00220321
4	A4	123	91.5388	0.0367281	0.00223789
4	A4	124	91.7961	0.0370222	0.00217776
4	A4	125	92.0534	0.0367876	0.0020511
4	A4	126	92.3106	0.0365036	0.0019008
4	A4	127	92.5679	0.035856	0.0017659
4	A4	128	92.8251	0.0366763	0.0016712
4	A4	129	93.0824	0.0356111	0.00162396
4	A4	130	93.3396	0.0359761	0.00161487
4	A4	131	93.5969	0.0353546	0.00162043
4	A4	132	93.8542	0.0353808	0.00160729
4	A4	133	94.1114	0.0350977	0.00153986
4	A4	134	94.3687	0.0346732	0.00139161
4	A4	135	94.6259	0.0347488	0.00115732
4	A4	136	94.8832	0.0337895	0.000860234
5	A5	1	60.1536	2.01764	0.0909358
5	A5	2	60.4109	2.00258	0.0917626
5	A5	3	60.6681	1.98784	0.0923423
5	A5	4	60.9254	1.97826	0.0925925
5	A5	5	61.1826	1.97102	0.0925956
5	A5	6	61.4399	1.95609	0.0925115
5	A5	7	61.6971	1.94716	0.0924685
5	A5	8	61.9544	1.93551	0.092502
5	A5	9	62.2116	1.91999	0.0925654
5	A5	10	62.4689	1.91118	0.0925577
5	A5	11	62.7262	1.9021	0.0923568
5	A5	12	62.9834	1.88813	0.0918643
5	A5	13	63.2407	1.87492	0.0910747
5	A5	14	63.4979	1.86311	0.0901175
5	A5	15	63.7552	1.85294	0.0892401
5	A5	16	64.0124	1.84139	0.0886959
5	A5	17	64.2697	1.83585	0.0886135
5	A5	18	64.527	1.82051	0.0889227
5	A5	19	64.7842	1.81152	0.0893911
5	A5	20	65.0415	1.79916	0.0897322
5	A5	21	65.2987	1.78689	0.0897246
5	A5	22	65.556	1.77598	0.0892774
5	A5	23	65.8132	1.76525	0.0884354
5	A5	24	66.0705	1.753	0.0873419
5	A5	25	66.3277	1.74409	0.0861917
5	A5	26	66.585	1.73069	0.0851712
5	A5	27	66.8423	1.72209	0.0843975
5	A5	28	67.0995	1.71265	0.0838673
5	A5	29	67.3568	1.70311	0.0834537
5	A5	30	67.614	1.69178	0.082985
5	A5	31	67.8713	1.67969	0.0823564
5	A5	32	68.1285	1.6684	0.0816062
5	A5	33	68.3858	1.65823	0.0808898
5	A5	34	68.6431	1.65234	0.0803677
5	A5	35	68.9003	1.64328	0.0800937
5	A5	36	69.1576	1.63081	0.0799982
5	A5	37	69.4148	1.61942	0.0799697
5	A5	38	69.6721	1.60998	0.0799514
5	A5	39	69.9293	1.60093	0.079975
5	A5	40	70.1866	1.59107	0.0801041
5	A5	41	70.4438	1.58006	0.0803421
5	A5	42	70.7011	1.57203	0.0805856
5	A5	43	70.9584	1.56373	0.0806621
5	A5	44	71.2156	1.54722	0.0804364
5	A5	45	71.4729	1.53965	0.0799119
5	A5	46	71.7301	1.52799	0.0792604
5	A5	47	71.9874	1.52439	0.0787669
5	A5	48	72.2446	1.50699	0.0787161
5	A5	49	72.5019	1.50241	0.0792691
5	A5	50	72.7591	1.4939	0.0803848
5	A5	51	73.0164	1.48167	0.0818081
5	A5	52	73.2737	1.47203	0.083151
5	A5	53	73.5309	1.46299	0.0840442
5	A5	54	73.7882	1.44823	0.0843097
5	A5	55	74.0454	1.43226	0.0840472
5	A5	56	74.3027	1.42968	0.08358
5	A5	57	74.5599	1.41899	0.0832796
5	A5	58	74.8172	1.40852	0.0833826
5	A5	59	75.0745	1.39657	0.0839057
5	A5	60	75.3317	1.38843	0.0846856
5	A5	61	75.589	1.3743	0.0854892
5	A5	62	75.8462	1.36615	0.0861102
5	A5	63	76.1035	1.3531	0.0864128
5	A5	64	76.3607	1.34342	0.0863354
5	A5	65	76.618	1.33333	0.0858855
5	A5	66	76.8752	1.3192	0.0851443
5	A5	67	77.1325	1.31034	0.0842641
5	A5	68	77.3898	1.30013	0.0834397
5	A5	69	77.647	1.29072	0.0828492
5	A5	70	77.9043	1.28124	0.0825899
5	A5	71	78.1615	1.2692	0.082648
5	A5	72	78.4188	1.26101	0.0829201
5	A5	73	78.676	1.24988	0.0832668
5	A5	74	78.9333	1.23902	0.0835867
5	A5	75	79.1906	1.22683	0.0838577
5	A5	76	79.4478	1.21839	0.0841429
5	A5	77	79.7051	1.20621	0.0845518
5	A5	78	79.9623	1.20142	0.0852094
5	A5	79	80.2196	1.18325	0.0862427
5	A5	80	80.4768	1.17582	0.0877767
5	A5	81	80.7341	1.16412	0.0899025
5	A5	82	80.9913	1.15547	0.092612
5	A5	83	81.2486	1.14613	0.0957365
5	A5	84	81.5059	1.12793	0.098967
5	A5	85	81.7631	1.11756	0.102009
5	A5	86	82.0204	1.10468	0.104867
5	A5	87	82.2776	1.08641	0.108198
5	A5	88	82.5349	1.07547	0.113689
5	A5	89	82.7921	1.062	0.124366
5	A5	90	83.0494	1.04947	0.1447
5	A5	91	83.3066	1.04085	0.180257
5	A5	92	83.5639	1.0227	0.236562
5	A5	93	83.8212	1.00986	0.317014
5	A5	94	84.0784	0.984868	0.420198
5	A5	95	84.3357	0.949641	0.537645
5	A5	96	84.5929	0.881857	0.653548
5	A5	97	84.8502	0.732019	0.747515
5	A5	98	85.1074	0.560246	0.800044
5	A5	99	85.3647	0.393127	0.798775
5	A5	100	85.622	0.25419	0.742765
5	A5	101	85.8792	0.161189	0.6428
5	A5	102	86.1365	0.115911	0.517642
5	A5	103	86.3937	0.100447	0.388029
5	A5	104	86.651	0.093724	0.271029
5	A5	105	86.9082	0.0912714	0.176774
5	A5	106	87.1655	0.0891276	0.108129
5	A5	107	87.4227	0.0890553	0.0625649
5	A5	108	87.68	0.0878521	0.034825
5	A5	109	87.9373	0.08728	0.019239
5	A5	110	88.1945	0.0867783	0.0110913
5	A5	111	88.4518	0.0866245	0.00707473
5	A5	112	88.709	0.085828	0.00515735
5	A5	113	88.9663	0.0855439	0.00422123
5	A5	114	89.2235	0.0848434	0.00370966
5	A5	115	89.4808	0.0844259	0.00337474
5	A5	116	89.7381	0.0841517	0.00312391
5	A5	117	89.9953	0.0844389	0.0029329
5	A5	118	90.2526	0.0834839	0.00279731
5	A5	119	90.5098	0.083342	0.00271025
5	A5	120	90.7671	0.0828394	0.00265787
5	A5	121	91.0243	0.0827473	0.00262445
5	A5	122	91.2816	0.0824294	0.00259774
5	A5	123	91.5388	0.0820445	0.00257093
5	A5	124	91.7961	0.0815973	0.00254265
5	A5	125	92.0534	0.0811894	0.0025163
5	A5	126	92.3106	0.0813752	0.00249667
5	A5	127	92.5679	0.080714	0.00248432
5	A5	128	92.8251	0.0807044	0.00247003
5	A5	129	93.0824	0.0800549	0.00243572
5	A5	130	93.3396	0.0796986	0.00236282
5	A5	131	93.5969	0.0792406	0.00224097
5	A5	132	93.8542	0.079487	0.0020691
5	A5	133	94.1114	0.0792478	0.00184867
5	A5	134	94.3687	0.0791549	0.00157828
5	A5	135	94.6259	0.0779912	0.00125889
5	A5	136	94.8832	0.0781667	0.000906332
6	A6	1	60.1536	1.91134	0.0860551
6	A6	2	60.4109	1.8986	0.0859812
6	A6	3	60.6681	1.8847	0.0858802
6	A6	4	60.9254	1.87551	0.0859744
6	A6	5	61.1826	1.86993	0.0864868
6	A6	6	61.4399	1.8564	0.0874414
6	A6	7	61.6971	1.85006	0.0885724
6	A6	8	61.9544	1.83567	0.0894384
6	A6	9	62.2116	1.81752	0.0896751
6	A6	10	62.4689	1.8059	0.0892112
6	A6	11	62.7262	1.79623	0.0882925
6	A6	12	62.9834	1.78836	0.0873116
6	A6	13	63.2407	1.77149	0.0865593
6	A6	14	63.4979	1.7656	0.0860788
6	A6	15	63.7552	1.75568	0.0856768
6	A6	16	64.0124	1.74185	0.0850962
6	A6	17	64.2697	1.72507	0.0842095
6	A6	18	64.527	1.7186	0.0831196
6	A6	19	64.7842	1.70796	0.0821021
6	A6	20	65.0415	1.69755	0.0814317
6	A6	21	65.2987	1.68879	0.0812215
6	A6	22	65.556	1.68038	0.0813654
6	A6	23	65.8132	1.66598	0.0816106
6	A6	24	66.0705	1.65521	0.0816995
6	A6	25	66.3277	1.64361	0.0814871
6	A6	26	66.585	1.63781	0.080984
6	A6	27	66.8423	1.61985	0.0803209
6	A6	28	67.0995	1.61316	0.0796639
6	A6	29	67.3568	1.60342	0.0791364
6	A6	30	67.614	1.59624	0.078775
6	A6	31	67.8713	1.58087	0.0785515
6	A6	32	68.1285	1.57195	0.0784226
6	A6	33	68.3858	1.56275	0.0783716
6	A6	34	68.6431	1.55329	0.0784088
6	A6	35	68.9003	1.5404	0.0785279
6	A6	36	69.1576	1.53352	0.078678
6	A6	37	69.4148	1.52481	0.0787725
6	A6	38	69.6721	1.50849	0.0787442
6	A6	39	69.9293	1.49844	0.0785842
6	A6	40	70.1866	1.49259	0.0783337
6	A6	41	70.4438	1.48151	0.078032
6	A6	42	70.7011	1.46798	0.0776652
6	A6	43	70.9584	1.46203	0.0771689
6	A6	44	71.2156	1.45054	0.0764847
6	A6	45	71.4729	1.43728	0.0756304
6	A6	46	71.7301	1.43029	0.0747336
6	A6	47	71.9874	1.41971	0.0739958
6	A6	48	72.2446	1.41128	0.0736143
6	A6	49	72.5019	1.40212	0.0737114
6	A6	50	72.7591	1.39476	0.0742995
6	A6	51	73.0164	1.38028	0.0752953
6	A6	52	73.2737	1.37313	0.0765568
6	A6	53	73.5309	1.36553	0.0779144
6	A6	54	73.7882	1.35068	0.0791971
6	A6	55	74.0454	1.34365	0.0802755
6	A6	56	74.3027	1.33005	0.0811004
6	A6	57	74.5599	1.31781	0.0817212
6	A6	58	74.8172	1.31074	0.0822492
6	A6	59	75.0745	1.29689	0.0827739
6	A6	60	75.3317	1.29039	0.0832912
6	A6	61	75.589	1.27601	0.0836928
6	A6	62	75.8462	1.2665	0.0838369
6	A6	63	76.1035	1.2524	0.0836482
6	A6	64	76.3607	1.24098	0.0831785
6	A6	65	76.618	1.23311	0.0825783
6	A6	66	76.8752	1.22325	0.0820238
6	A6	67	77.1325	1.21166	0.0816338
6	A6	68	77.3898	1.19897	0.0814416
6	A6	69	77.647	1.19019	0.0813948
6	A6	70	77.9043	1.18095	0.0813823
6	A6	71	78.1615	1.17025	0.0812653
6	A6	72	78.4188	1.15748	0.0809367
6	A6	73	78.676	1.14636	0.0803898
6	A6	74	78.9333	1.13646	0.0797575
6	A6	75	79.1906	1.12521	0.0792793
6	A6	76	79.4478	1.11824	0.0792075
6	A6	77	79.7051	1.1086	0.079703
6	A6	78	79.9623	1.09706	0.080799
6	A6	79	80.2196	1.08499	0.0824368
6	A6	80	80.4768	1.07625	0.0845355
6	A6	81	80.7341	1.06432	0.0870356
6	A6	82	80.9913	1.05211	0.0898836
6	A6	83	81.2486	1.0434	0.0929843
6	A6	84	81.5059	1.02807	0.0961809
6	A6	85	81.7631	1.01539	0.0993282
6	A6	86	82.0204	1.00464	0.102491
6	A6	87	82.2776	0.984944	0.106255
6	A6	88	82.5349	0.970292	0.11211
6	A6	89	82.7921	0.961735	0.122781
6	A6	90	83.0494	0.946742	0.142383
6	A6	91	83.3066	0.932987	0.176118
6	A6	92	83.5639	0.919384	0.229241
6	A6	93	83.8212	0.902404	0.305126
6	A6	94	84.0784	0.879977	0.402734
6	A6	95	84.3357	0.844271	0.514441
6	A6	96	84.5929	0.768193	0.625626
6	A6	97	84.8502	0.635245	0.717051
6	A6	98	85.1074	0.462296	0.769882
6	A6	99	85.3647	0.29044	0.771632
6	A6	100	85.622	0.146153	0.720489
6	A6	101	85.8792	0.0484646	0.626017
6	A6	102	86.1365	0.00161802	0.505888
6	A6	103	86.3937	-0.0152787	0.380212
6	A6	104	86.651	-0.0206688	0.265939
6	A6	105	86.9082	-0.0231474	0.173405
6	A6	106	87.1655	-0.0246403	0.105787
6	A6	107	87.4227	-0.0252899	0.0608061
6	A6	108	87.68	-0.0267908	0.0333606
6	A6	109	87.9373	-0.0269514	0.0178713
6	A6	110	88.1945	-0.0268204	0.00969339
6	A6	111	88.4518	-0.027434	0.00558982
6	A6	112	88.709	-0.0271648	0.00358974
6	A6	113	88.9663	-0.0279682	0.00261181
6	A6	114	89.2235	-0.0281665	0.00210447
6	A6	115	89.4808	-0.0280375	0.00180046
6	A6	116	89.7381	-0.0285857	0.00158045
6	A6	117	89.9953	-0.0288602	0.00140349
6	A6	118	90.2526	-0.0285329	0.0012674
6	A6	119	90.5098	-0.0287323	0.00118079
6	A6	120	90.7671	-0.0287452	0.00114398
6	A6	121	91.0243	-0.0293017	0.00114177
6	A6	122	91.2816	-0.0291795	0.00114865
6	A6	123	91.5388	-0.0294606	0.00114087
6	A6	124	91.7961	-0.0299511	0.00110646
6	A6	125	92.0534	-0.0294047	0.00104788
6	A6	126	92.3106	-0.0297683	0.000978011
6	A6	127	92.5679	-0.0302311	0.000914131
6	A6	128	92.8251	-0.0301469	0.000872332
6	A6	129	93.0824	-0.0299097	0.000862065
6	A6	130	93.3396	-0.0298904	0.000880511
6	A6	131	93.5969	-0.0305382	0.000909916
6	A6	132	93.8542	-0.0308433	0.000921891
6	A6	133	94.1114	-0.0302882	0.000888557
6	A6	134	94.3687	-0.030938	0.000795139
6	A6	135	94.6259	-0.0312893	0.000647194
6	A6	136	94.8832	-0.0308425	0.000468791
7	A7	1	60.1536	1.87751	0.0826246
7	A7	2	60.4109	1.86634	0.0838268
7	A7	3	60.6681	1.85415	0.08469
7	A7	4	60.9254	1.84269	0.0849533
7	A7	5	61.1826	1.82787	0.0846384
7	A7	6	61.4399	1.81658	0.0840132
7	A7	7	61.6971	1.81476	0.0834119
7	A7	8	61.9544	1.79846	0.0830481
7	A7	9	62.2116	1.78493	0.0829314
7	A7	10	62.4689	1.78051	0.0829123
7	A7	11	62.7262	1.76545	0.0828024
7	A7	12	62.9834	1.75209	0.0824782
7	A7	13	63.2407	1.74486	0.0819205
7	A7	14	63.4979	1.73255	0.0811905
7	A7	15	63.7552	1.71957	0.0803778
7	A7	16	64.0124	1.71478	0.0795527
7	A7	17	64.2697	1.69977	0.0787626
7	A7	18	64.527	1.69036	0.0780542
7	A7	19	64.7842	1.68106	0.0774949
7	A7	20	65.0415	1.66953	0.0771641
7	A7	21	65.2987	1.66005	0.0771058
7	A7	22	65.556	1.65444	0.0772808
7	A7	23	65.8132	1.63947	0.0775521
7	A7	24	66.0705	1.62936	0.0777229
7	A7	25	66.3277	1.62222	0.0776077
7	A7	26	66.585	1.60785	0.0771024
7	A7	27	66.8423	1.59769	0.0762168
7	A7	28	67.0995	1.59032	0.0750651
7	A7	29	67.3568	1.57587	0.0738096
7	A7	30	67.614	1.5706	0.0725953
7	A7	31	67.8713	1.5619	0.071506
7	A7	32	68.1285	1.5492	0.0705649
7	A7	33	68.3858	1.54272	0.0697677
7	A7	34	68.6431	1.53104	0.06911
7	A7	35	68.9003	1.5236	0.0685651
7	A7	36	69.1576	1.51566	0.0680256
7	A7	37	69.4148	1.50664	0.0672659
7	A7	38	69.6721	1.49563	0.0659761
7	A7	39	69.9293	1.49074	0.0638976
7	A7	40	70.1866	1.47611	0.0609824
7	A7	41	70.4438	1.46421	0.0574814
7	A7	42	70.7011	1.46121	0.0538822
7	A7	43	70.9584	1.46084	0.0507458
7	A7	44	71.2156	1.4526	0.0485336
7	A7	45	71.4729	1.44117	0.0475212
7	A7	46	71.7301	1.43843	0.0477933
7	A7	47	71.9874	1.43893	0.0492671
7	A7	48	72.2446	1.426	0.0517057
7	A7	49	72.5019	1.42375	0.0547548
7	A7	50	72.7591	1.41329	0.0580145
7	A7	51	73.0164	1.40437	0.0611449
7	A7	52	73.2737	1.39709	0.063941
7	A7	53	73.5309	1.38686	0.0663498
7	A7	54	73.7882	1.37733	0.0684237
7	A7	55	74.0454	1.3717	0.0702574
7	A7	56	74.3027	1.35847	0.071942
7	A7	57	74.5599	1.34963	0.0735484
7	A7	58	74.8172	1.33858	0.0751043
7	A7	59	75.0745	1.3294	0.0765664
7	A7	60	75.3317	1.32264	0.0778056
7	A7	61	75.589	1.30849	0.0786421
7	A7	62	75.8462	1.29686	0.0789429
7	A7	63	76.1035	1.28251	0.0787163
7	A7	64	76.3607	1.27835	0.0781365
7	A7	65	76.618	1.2661	0.0774635
7	A7	66	76.8752	1.25565	0.0769279
7	A7	67	77.1325	1.24604	0.076633
7	A7	68	77.3898	1.23927	0.0765485
7	A7	69	77.647	1.22439	0.0765756
7	A7	70	77.9043	1.2159	0.0766394
7	A7	71	78.1615	1.20483	0.0767399
7	A7	72	78.4188	1.19637	0.0769426
7	A7	73	78.676	1.1858	0.0773135
7	A7	74	78.9333	1.17583	0.0778612
7	A7	75	79.1906	1.16725	0.0785242
7	A7	76	79.4478	1.15489	0.0792251
7	A7	77	79.7051	1.14081	0.079947
7	A7	78	79.9623	1.13553	0.080787
7	A7	79	80.2196	1.12205	0.0819489
7	A7	80	80.4768	1.1134	0.0836879
7	A7	81	80.7341	1.10064	0.086236
7	A7	82	80.9913	1.09071	0.0897294
7	A7	83	81.2486	1.08067	0.0941515
7	A7	84	81.5059	1.06697	0.0993159
7	A7	85	81.7631	1.05256	0.104916
7	A7	86	82.0204	1.03919	0.110702
7	A7	87	82.2776	1.02294	0.116814
7	A7	88	82.5349	1.0045	0.124259
7	A7	89	82.7921	0.984519	0.135408
7	A7	90	83.0494	0.973277	0.15427
7	A7	91	83.3066	0.954277	0.186203
7	A7	92	83.5639	0.944115	0.236735
7	A7	93	83.8212	0.923052	0.309415
7	A7	94	84.0784	0.903455	0.403156
7	A7	95	84.3357	0.866301	0.510115
7	A7	96	84.5929	0.785251	0.615527
7	A7	97	84.8502	0.652519	0.700366
7	A7	98	85.1074	0.479141	0.746516
7	A7	99	85.3647	0.31185	0.742605
7	A7	100	85.622	0.174077	0.68798
7	A7	101	85.8792	0.0850252	0.592961
7	A7	102	86.1365	0.0447003	0.475275
7	A7	103	86.3937	0.030765	0.354361
7	A7	104	86.651	0.0248942	0.246038
7	A7	105	86.9082	0.0231418	0.15947
7	A7	106	87.1655	0.0209714	0.0969601
7	A7	107	87.4227	0.0197647	0.0558225
7	A7	108	87.68	0.0193502	0.0309643
7	A7	109	87.9373	0.0189713	0.0170534
7	A7	110	88.1945	0.018454	0.00975428
7	A7	111	88.4518	0.0176872	0.00609008
7	A7	112	88.709	0.0174121	0.00426997
7	A7	113	88.9663	0.0173948	0.00332631
7	A7	114	89.2235	0.0172463	0.00277592
7	A7	115	89.4808	0.0163667	0.00238831
7	A7	116	89.7381	0.0159148	0.00205929
7	A7	117	89.9953	0.0163664	0.00175392
7	A7	118	90.2526	0.0157811	0.00147976
7	A7	119	90.5098	0.0161456	0.0012662
7	A7	120	90.7671	0.0157113	0.00114352
7	A7	121	91.0243	0.0159279	0.00112634
7	A7	122	91.2816	0.0157398	0.00120665
7	A7	123	91.5388	0.0151859	0.00135589
7	A7	124	91.7961	0.0154846	0.0015323
7	A7	125	92.0534	0.0148291	0.00169025
7	A7	126	92.3106	0.014567	0.00179011
7	A7	127	92.5679	0.0142774	0.00180828
7	A7	128	92.8251	0.0137945	0.00174435
7	A7	129	93.0824	0.0137637	0.00162096
7	A7	130	93.3396	0.0138473	0.00147334
7	A7	131	93.5969	0.013627	0.00133196
7	A7	132	93.8542	0.0134487	0.00120757
7	A7	133	94.1114	0.0134435	0.00108799
7	A7	134	94.3687	0.0128821	0.000949419
7	A7	135	94.6259	0.0129657	0.00077528
7	A7	136	94.8832	0.0125764	0.000570138
8	A8	1	60.1536	1.83229	0.0802532
8	A8	2	60.4109	1.82132	0.0806821
8	A8	3	60.6681	1.80968	0.0810724
8	A8	4	60.9254	1.79924	0.0814102
8	A8	5	61.1826	1.79177	0.0817633
8	A8	6	61.4399	1.77907	0.082205
8	A8	7	61.6971	1.77004	0.0827345
8	A8	8	61.9544	1.758	0.0832412
8	A8	9	62.2116	1.74417	0.0835398
8	A8	10	62.4689	1.73812	0.0834586
8	A8	11	62.7262	1.72391	0.0829317
8	A8	12	62.9834	1.70861	0.082046
8	A8	13	63.2407	1.69875	0.0810022
8	A8	14	63.4979	1.69454	0.0800105
8	A8	15	63.7552	1.67779	0.079185
8	A8	16	64.0124	1.67606	0.0785187
8	A8	17	64.2697	1.65413	0.0779388
8	A8	18	64.527	1.64839	0.0773987
8	A8	19	64.7842	1.64123	0.0769222
8	A8	20	65.0415	1.62913	0.0765781
8	A8	21	65.2987	1.61714	0.0764122
8	A8	22	65.556	1.6102	0.0763909
8	A8	23	65.8132	1.59899	0.0763902
8	A8	24	66.0705	1.59099	0.076239
8	A8	25	66.3277	1.57635	0.0757987
8	A8	26	66.585	1.56739	0.075037
8	A8	27	66.8423	1.55775	0.0740461
8	A8	28	67.0995	1.54524	0.0729959
8	A8	29	67.3568	1.54196	0.0720427
8	A8	30	67.614	1.52869	0.0712681
8	A8	31	67.8713	1.51971	0.0706648
8	A8	32	68.1285	1.51125	0.0701739
8	A8	33	68.3858	1.49944	0.0697149
8	A8	34	68.6431	1.49313	0.0691954
8	A8	35	68.9003	1.48423	0.0684988
8	A8	36	69.1576	1.47388	0.067486
8	A8	37	69.4148	1.46328	0.0660232
8	A8	38	69.6721	1.45445	0.0640103
8	A8	39	69.9293	1.44742	0.0614193
8	A8	40	70.1866	1.43856	0.0583195
8	A8	41	70.4438	1.43041	0.0549032
8	A8	42	70.7011	1.42017	0.0514917
8	A8	43	70.9584	1.41701	0.0484903
8	A8	44	71.2156	1.41233	0.0462943
8	A8	45	71.4729	1.4072	0.0451871
8	A8	46	71.7301	1.40163	0.0452875
8	A8	47	71.9874	1.398	0.0465723
8	A8	48	72.2446	1.3864	0.0489185
8	A8	49	72.5019	1.38536	0.0521266
8	A8	50	72.7591	1.37773	0.0559048
8	A8	51	73.0164	1.37067	0.0598648
8	A8	52	73.2737	1.3626	0.0635815
8	A8	53	73.5309	1.34792	0.066712
8	A8	54	73.7882	1.34099	0.0691057
8	A8	55	74.0454	1.33027	0.0708361
8	A8	56	74.3027	1.32193	0.0721242
8	A8	57	74.5599	1.31281	0.073212
8	A8	58	74.8172	1.29936	0.0742573
8	A8	59	75.0745	1.29573	0.0752957
8	A8	60	75.3317	1.28049	0.0762684
8	A8	61	75.589	1.26967	0.0770819
8	A8	62	75.8462	1.26097	0.0776578
8	A8	63	76.1035	1.25192	0.0779587
8	A8	64	76.3607	1.23774	0.0779918
8	A8	65	76.618	1.22996	0.0778048
8	A8	66	76.8752	1.21682	0.0774686
8	A8	67	77.1325	1.20949	0.0770545
8	A8	68	77.3898	1.19829	0.076613
8	A8	69	77.647	1.18881	0.0761736
8	A8	70	77.9043	1.17814	0.0757683
8	A8	71	78.1615	1.16548	0.0754521
8	A8	72	78.4188	1.15905	0.0752931
8	A8	73	78.676	1.14803	0.0753287
8	A8	74	78.9333	1.14174	0.075531
8	A8	75	79.1906	1.12616	0.0758272
8	A8	76	79.4478	1.1192	0.0761687
8	A8	77	79.7051	1.10458	0.0766031
8	A8	78	79.9623	1.09905	0.0772851
8	A8	79	80.2196	1.08745	0.0784249
8	A8	80	80.4768	1.0791	0.0802162
8	A8	81	80.7341	1.06731	0.0827991
8	A8	82	80.9913	1.05488	0.0862568
8	A8	83	81.2486	1.04448	0.0906082
8	A8	84	81.5059	1.03391	0.0957733
8	A8	85	81.7631	1.02127	0.101555
8	A8	86	82.0204	1.00737	0.107742
8	A8	87	82.2776	0.989682	0.11442
8	A8	88	82.5349	0.971766	0.122491
8	A8	89	82.7921	0.955296	0.134229
8	A8	90	83.0494	0.937075	0.153577
8	A8	91	83.3066	0.922425	0.185823
8	A8	92	83.5639	0.911076	0.236364
8	A8	93	83.8212	0.89457	0.308544
8	A8	94	84.0784	0.870346	0.401084
8	A8	95	84.3357	0.824708	0.506119
8	A8	96	84.5929	0.752106	0.609143
8	A8	97	84.8502	0.618054	0.691644
8	A8	98	85.1074	0.446519	0.736096
8	A8	99	85.3647	0.280477	0.73155
8	A8	100	85.622	0.145361	0.677455
8	A8	101	85.8792	0.0564505	0.583907
8	A8	102	86.1365	0.015572	0.468201
8	A8	103	86.3937	0.000886645	0.349318
8	A8	104	86.651	-0.00327784	0.242729
8	A8	105	86.9082	-0.00645916	0.157426
8	A8	106	87.1655	-0.00854061	0.0957038
8	A8	107	87.4227	-0.00921685	0.0549715
8	A8	108	87.68	-0.00968039	0.0302722
8	A8	109	87.9373	-0.010178	0.0164042
8	A8	110	88.1945	-0.0107356	0.00912996
8	A8	111	88.4518	-0.0104264	0.00552948
8	A8	112	88.709	-0.0110725	0.00383031
8	A8	113	88.9663	-0.0116326	0.00305519
8	A8	114	89.2235	-0.0116356	0.00269797
8	A8	115	89.4808	-0.0120787	0.00250358
8	A8	116	89.7381	-0.0123982	0.00234687
8	A8	117	89.9953	-0.01324	0.00217607
8	A8	118	90.2526	-0.0127734	0.00198735
8	A8	119	90.5098	-0.0134313	0.00180778
8	A8	120	90.7671	-0.0132246	0.00167596
8	A8	121	91.0243	-0.0134071	0.00162083
8	A8	122	91.2816	-0.0134014	0.00164625
8	A8	123	91.5388	-0.0140019	0.00172794
8	A8	124	91.7961	-0.0143749	0.00182323
8	A8	125	92.0534	-0.0145923	0.00188688
8	A8	126	92.3106	-0.014538	0.00188524
8	A8	127	92.5679	-0.015203	0.00180499
8	A8	128	92.8251	-0.0157903	0.00165665
8	A8	129	93.0824	-0.0153246	0.00147209
8	A8	130	93.3396	-0.0156905	0.0012939
8	A8	131	93.5969	-0.0155243	0.00115669
8	A8	132	93.8542	-0.0155671	0.00106841
8	A8	133	94.1114	-0.0158054	0.00100443
8	A8	134	94.3687	-0.0162412	0.000921442
8	A8	135	94.6259	-0.0167453	0.000784763
8	A8	136	94.8832	-0.016595	0.000591034
9	A9	1	60.1536	1.84992	0.0795882
9	A9	2	60.4109	1.84464	0.0803757
9	A9	3	60.6681	1.83025	0.0813327
9	A9	4	60.9254	1.82344	0.0822513
9	A9	5	61.1826	1.81314	0.0829288
9	A9	6	61.4399	1.79972	0.0832315
9	A9	7	61.6971	1.78623	0.0831302
9	A9	8	61.9544	1.77689	0.0827071
9	A9	9	62.2116	1.76906	0.082133
9	A9	10	62.4689	1.75427	0.0816105
9	A9	11	62.7262	1.74222	0.0812945
9	A9	12	62.9834	1.7363	0.081204
9	A9	13	63.2407	1.72191	0.0811854
9	A9	14	63.4979	1.72105	0.0809801
9	A9	15	63.7552	1.6994	0.0803834
9	A9	16	64.0124	1.68246	0.0794057
9	A9	17	64.2697	1.68102	0.0782895
9	A9	18	64.527	1.67159	0.077368
9	A9	19	64.7842	1.66187	0.0768545
9	A9	20	65.0415	1.65159	0.0767305
9	A9	21	65.2987	1.63995	0.0767991
9	A9	22	65.556	1.62974	0.0768334
9	A9	23	65.8132	1.62055	0.0767068
9	A9	24	66.0705	1.60618	0.0764187
9	A9	25	66.3277	1.60094	0.0760348
9	A9	26	66.585	1.59076	0.0756077
9	A9	27	66.8423	1.57871	0.0751422
9	A9	28	67.0995	1.56852	0.0746219
9	A9	29	67.3568	1.56054	0.0740555
9	A9	30	67.614	1.5461	0.0734965
9	A9	31	67.8713	1.54235	0.0730256
9	A9	32	68.1285	1.53199	0.0726965
9	A9	33	68.3858	1.51713	0.0724898
9	A9	34	68.6431	1.51434	0.072284
9	A9	35	68.9003	1.50161	0.071862
9	A9	36	69.1576	1.49279	0.070956
9	A9	37	69.4148	1.48259	0.0693355
9	A9	38	69.6721	1.47055	0.0669102
9	A9	39	69.9293	1.46195	0.0637901
9	A9	40	70.1866	1.45496	0.0602793
9	A9	41	70.4438	1.44393	0.0567965
9	A9	42	70.7011	1.44352	0.0537574
9	A9	43	70.9584	1.43225	0.0514753
9	A9	44	71.2156	1.42748	0.0501069
9	A9	45	71.4729	1.42214	0.0496553
9	A9	46	71.7301	1.41939	0.0500334
9	A9	47	71.9874	1.40766	0.0511528
9	A9	48	72.2446	1.39992	0.0529816
9	A9	49	72.5019	1.39676	0.0555311
9	A9	50	72.7591	1.38981	0.0587619
9	A9	51	73.0164	1.38081	0.0624886
9	A9	52	73.2737	1.37619	0.0663636
9	A9	53	73.5309	1.36269	0.0699768
9	A9	54	73.7882	1.34979	0.0730084
9	A9	55	74.0454	1.34066	0.075324
9	A9	56	74.3027	1.33177	0.0769605
9	A9	57	74.5599	1.3218	0.0780383
9	A9	58	74.8172	1.31218	0.0786803
9	A9	59	75.0745	1.29409	0.0790003
9	A9	60	75.3317	1.2909	0.0791204
9	A9	61	75.589	1.27562	0.0791693
9	A9	62	75.8462	1.26894	0.0792423
9	A9	63	76.1035	1.25826	0.0793595
9	A9	64	76.3607	1.24753	0.079476
9	A9	65	76.618	1.23288	0.0795347
9	A9	66	76.8752	1.22504	0.0795148
9	A9	67	77.1325	1.21535	0.0794342
9	A9	68	77.3898	1.20416	0.0793062
9	A9	69	77.647	1.19416	0.0791034
9	A9	70	77.9043	1.18354	0.0787795
9	A9	71	78.1615	1.17121	0.0783344
9	A9	72	78.4188	1.16107	0.0778703
9	A9	73	78.676	1.15095	0.0775816
9	A9	74	78.9333	1.1431	0.0776721
9	A9	75	79.1906	1.1323	0.0782478
9	A9	76	79.4478	1.12225	0.0792574
9	A9	77	79.7051	1.11286	0.080534
9	A9	78	79.9623	1.10047	0.0819254
9	A9	79	80.2196	1.08639	0.0834346
9	A9	80	80.4768	1.07564	0.0852773
9	A9	81	80.7341	1.06779	0.0878098
9	A9	82	80.9913	1.05788	0.0913541
9	A9	83	81.2486	1.04386	0.0960289
9	A9	84	81.5059	1.03256	0.101666
9	A9	85	81.7631	1.0177	0.107877
9	A9	86	82.0204	1.0027	0.114261
9	A9	87	82.2776	0.983813	0.120753
9	A9	88	82.5349	0.969719	0.128089
9	A9	89	82.7921	0.947213	0.138328
9	A9	90	83.0494	0.929172	0.155212
9	A9	91	83.3066	0.915397	0.184047
9	A9	92	83.5639	0.899921	0.230697
9	A9	93	83.8212	0.884172	0.299531
9	A9	94	84.0784	0.861923	0.390652
9	A9	95	84.3357	0.828773	0.497446
9	A9	96	84.5929	0.764431	0.605911
9	A9	97	84.8502	0.629996	0.696907
9	A9	98	85.1074	0.45637	0.751219
9	A9	99	85.3647	0.280954	0.755704
9	A9	100	85.622	0.135785	0.707879
9	A9	101	85.8792	0.0386434	0.616797
9	A9	102	86.1365	-0.00832934	0.499813
9	A9	103	86.3937	-0.0251806	0.376857
9	A9	104	86.651	-0.0319044	0.264759
9	A9	105	86.9082	-0.0351335	0.173796
9	A9	106	87.1655	-0.0374785	0.107149
9	A9	107	87.4227	-0.0388457	0.0626278
9	A9	108	87.68	-0.0395418	0.0352791
9	A9	109	87.9373	-0.0398148	0.019675
9	A9	110	88.1945	-0.0407897	0.0112831
9	A9	111	88.4518	-0.0411898	0.00692703
9	A9	112	88.709	-0.0414379	0.00466544
9	A9	113	88.9663	-0.0417294	0.0034417
9	A9	114	89.2235	-0.0420621	0.00273594
9	A9	115	89.4808	-0.0422567	0.00231065
9	A9	116	89.7381	-0.0422473	0.00205604
9	A9	117	89.9953	-0.0426068	0.00190946
9	A9	118	90.2526	-0.042897	0.00182174
9	A9	119	90.5098	-0.0431355	0.00175116
9	A9	120	90.7671	-0.0434509	0.0016703
9	A9	121	91.0243	-0.0437806	0.00157336
9	A9	122	91.2816	-0.0439675	0.00147428
9	A9	123	91.5388	-0.0435615	0.00139394
9	A9	124	91.7961	-0.0435961	0.00134398
9	A9	125	92.0534	-0.0447445	0.0013186
9	A9	126	92.3106	-0.0444472	0.00129983
9	A9	127	92.5679	-0.044577	0.00127075
9	A9	128	92.8251	-0.0446272	0.00122561
9	A9	129	93.0824	-0.0451362	0.00116983
9	A9	130	93.3396	-0.0449881	0.00111177
9	A9	131	93.5969	-0.0450316	0.00105331
9	A9	132	93.8542	-0.0454302	0.000985821
9	A9	133	94.1114	-0.0452146	0.000894013
9	A9	134	94.3687	-0.0458424	0.000765878
9	A9	135	94.6259	-0.0460208	0.000602835
9	A9	136	94.8832	-0.0454671	0.000422993
10	A10	1	60.1536	1.75844	0.0852345
10	A10	2	60.4109	1.74933	0.0856568
10	A10	3	60.6681	1.73472	0.085927
10	A10	4	60.9254	1.7262	0.0859832
10	A10	5	61.1826	1.71841	0.0859269
10	A10	6	61.4399	1.69954	0.0859878
10	A10	7	61.6971	1.69343	0.0863912
10	A10	8	61.9544	1.68121	0.0871891
10	A10	9	62.2116	1.67337	0.0881638
10	A10	10	62.4689	1.66247	0.0888847
10	A10	11	62.7262	1.64586	0.0889219
10	A10	12	62.9834	1.63049	0.0880921
10	A10	13	63.2407	1.61762	0.0865725
10	A10	14	63.4979	1.61056	0.0847881
10	A10	15	63.7552	1.60051	0.0831659
10	A10	16	64.0124	1.59103	0.0819249
10	A10	17	64.2697	1.5801	0.0810492
10	A10	18	64.527	1.56777	0.0804205
10	A10	19	64.7842	1.55342	0.0799701
10	A10	20	65.0415	1.54697	0.0797251
10	A10	21	65.2987	1.53879	0.0797276
10	A10	22	65.556	1.52877	0.0799339
10	A10	23	65.8132	1.51599	0.080185
10	A10	24	66.0705	1.50496	0.0802865
10	A10	25	66.3277	1.49151	0.0801079
10	A10	26	66.585	1.48715	0.0796428
10	A10	27	66.8423	1.47059	0.0789975
10	A10	28	67.0995	1.46359	0.0783346
10	A10	29	67.3568	1.45172	0.0778131
10	A10	30	67.614	1.44169	0.0775374
10	A10	31	67.8713	1.43519	0.0775166
10	A10	32	68.1285	1.42239	0.0776467
10	A10	33	68.3858	1.41035	0.0777161
10	A10	34	68.6431	1.40264	0.0774597
10	A10	35	68.9003	1.39573	0.0766513
10	A10	36	69.1576	1.37775	0.0752125
10	A10	37	69.4148	1.3677	0.0732615
10	A10	38	69.6721	1.35724	0.0710645
10	A10	39	69.9293	1.35637	0.0689007
10	A10	40	70.1866	1.34528	0.0669416
10	A10	41	70.4438	1.33288	0.06523
10	A10	42	70.7011	1.32372	0.063753
10	A10	43	70.9584	1.31757	0.0625252
10	A10	44	71.2156	1.31194	0.0616165
10	A10	45	71.4729	1.30083	0.0611225
10	A10	46	71.7301	1.2968	0.0611315
10	A10	47	71.9874	1.28409	0.0617145
10	A10	48	72.2446	1.27744	0.0629136
10	A10	49	72.5019	1.27367	0.064706
10	A10	50	72.7591	1.26203	0.0669604
10	A10	51	73.0164	1.25355	0.0694206
10	A10	52	73.2737	1.24389	0.0717553
10	A10	53	73.5309	1.23492	0.0736603
10	A10	54	73.7882	1.22184	0.0749668
10	A10	55	74.0454	1.21177	0.075703
10	A10	56	74.3027	1.19934	0.0760707
10	A10	57	74.5599	1.19626	0.0763399
10	A10	58	74.8172	1.17973	0.0767274
10	A10	59	75.0745	1.17288	0.0773032
10	A10	60	75.3317	1.16378	0.077989
10	A10	61	75.589	1.15099	0.0786349
10	A10	62	75.8462	1.14229	0.0791271
10	A10	63	76.1035	1.12391	0.0794579
10	A10	64	76.3607	1.12268	0.0797059
10	A10	65	76.618	1.11015	0.0799488
10	A10	66	76.8752	1.09883	0.0801823
10	A10	67	77.1325	1.08722	0.0803115
10	A10	68	77.3898	1.0792	0.0802243
10	A10	69	77.647	1.06339	0.0798881
10	A10	70	77.9043	1.05391	0.0793887
10	A10	71	78.1615	1.04835	0.0788905
10	A10	72	78.4188	1.03332	0.0785393
10	A10	73	78.676	1.02665	0.0783908
10	A10	74	78.9333	1.01521	0.0784074
10	A10	75	79.1906	1.00515	0.0785167
10	A10	76	79.4478	0.991197	0.0786922
10	A10	77	79.7051	0.983477	0.078986
10	A10	78	79.9623	0.974641	0.0795081
10	A10	79	80.2196	0.963535	0.0803812
10	A10	80	80.4768	0.952227	0.0817058
10	A10	81	80.7341	0.939994	0.0835501
10	A10	82	80.9913	0.931656	0.0859365
10	A10	83	81.2486	0.920712	0.088823
10	A10	84	81.5059	0.908919	0.0920904
10	A10	85	81.7631	0.893368	0.0955981
10	A10	86	82.0204	0.883249	0.0993411
10	A10	87	82.2776	0.869194	0.103737
10	A10	88	82.5349	0.850123	0.109995
10	A10	89	82.7921	0.839582	0.120501
10	A10	90	83.0494	0.82641	0.139037
10	A10	91	83.3066	0.812465	0.17059
10	A10	92	83.5639	0.797068	0.220438
10	A10	93	83.8212	0.782346	0.292341
10	A10	94	84.0784	0.759765	0.386079
10	A10	95	84.3357	0.726387	0.49522
10	A10	96	84.5929	0.653876	0.606401
10	A10	97	84.8502	0.532413	0.701229
10	A10	98	85.1074	0.362941	0.760828
10	A10	99	85.3647	0.189785	0.7716
10	A10	100	85.622	0.0388065	0.729836
10	A10	101	85.8792	-0.070288	0.643064
10	A10	102	86.1365	-0.126246	0.52751
10	A10	103	86.3937	-0.147789	0.402859
10	A10	104	86.651	-0.155651	0.286632
10	A10	105	86.9082	-0.158878	0.190337
10	A10	106	87.1655	-0.160839	0.118395
10	A10	107	87.4227	-0.162198	0.0694631
10	A10	108	87.68	-0.16299	0.0389181
10	A10	109	87.9373	-0.16346	0.0212645
10	A10	110	88.1945	-0.164317	0.0117119
10	A10	111	88.4518	-0.163898	0.00680546
10	A10	112	88.709	-0.164194	0.00438099
10	A10	113	88.9663	-0.164574	0.00322123
10	A10	114	89.2235	-0.165129	0.00268866
10	A10	115	89.4808	-0.165228	0.00246054
10	A10	116	89.7381	-0.165614	0.00237633
10	A10	117	89.9953	-0.165939	0.00235881
10	A10	118	90.2526	-0.166162	0.00237061
10	A10	119	90.5098	-0.16619	0.00238788
10	A10	120	90.7671	-0.166923	0.00238835
10	A10	121	91.0243	-0.167464	0.00235313
10	A10	122	91.2816	-0.167682	0.00227605
10	A10	123	91.5388	-0.16753	0.00217016
10	A10	124	91.7961	-0.168172	0.00206426
10	A10	125	92.0534	-0.168347	0.0019904
10	A10	126	92.3106	-0.168044	0.00196937
10	A10	127	92.5679	-0.168928	0.00200117
10	A10	128	92.8251	-0.168867	0.00206353
10	A10	129	93.0824	-0.169218	0.00211802
10	A10	130	93.3396	-0.169745	0.00212126
10	A10	131	93.5969	-0.170009	0.00203814
10	A10	132	93.8542	-0.170502	0.00185336
10	A10	133	94.1114	-0.170396	0.00157727
10	A10	134	94.3687	-0.170727	0.00124353
10	A10	135	94.6259	-0.17078	0.000898822
10	A10	136	94.8832	-0.170444	0.000588436
11	A11	1	60.1536	1.90801	0.0812739
11	A11	2	60.4109	1.89931	0.0816393
11	A11	3	60.6681	1.89054	0.0820767
11	A11	4	60.9254	1.87526	0.0825157
11	A11	5	61.1826	1.87363	0.0828886
11	A11	6	61.4399	1.85596	0.083133
11	A11	7	61.6971	1.846	0.0832017
11	A11	8	61.9544	1.833	0.083084
11	A11	9	62.2116	1.82556	0.0828166
11	A11	10	62.4689	1.81072	0.0824765
11	A11	11	62.7262	1.80297	0.0821619
11	A11	12	62.9834	1.79034	0.0819759
11	A11	13	63.2407	1.77981	0.0819957
11	A11	14	63.4979	1.76723	0.0822357
11	A11	15	63.7552	1.75962	0.0826098
11	A11	16	64.0124	1.74947	0.0829375
11	A11	17	64.2697	1.73822	0.0830202
11	A11	18	64.527	1.71991	0.082745
11	A11	19	64.7842	1.71178	0.0821389
11	A11	20	65.0415	1.70309	0.0813274
11	A11	21	65.2987	1.69448	0.0804439
11	A11	22	65.556	1.68121	0.0795689
11	A11	23	65.8132	1.67037	0.0787363
11	A11	24	66.0705	1.65793	0.0779789
11	A11	25	66.3277	1.6492	0.0773298
11	A11	26	66.585	1.64327	0.0767816
11	A11	27	66.8423	1.62963	0.0762535
11	A11	28	67.0995	1.61939	0.0756262
11	A11	29	67.3568	1.60877	0.0748227
11	A11	30	67.614	1.598	0.0738696
11	A11	31	67.8713	1.58779	0.072891
11	A11	32	68.1285	1.58162	0.0720307
11	A11	33	68.3858	1.572	0.0713845
11	A11	34	68.6431	1.5613	0.0709774
11	A11	35	68.9003	1.5504	0.0707938
11	A11	36	69.1576	1.54337	0.0707938
11	A11	37	69.4148	1.53284	0.0708918
11	A11	38	69.6721	1.52493	0.0709219
11	A11	39	69.9293	1.51539	0.0706429
11	A11	40	70.1866	1.50609	0.0698292
11	A11	41	70.4438	1.49087	0.068394
11	A11	42	70.7011	1.48319	0.0664673
11	A11	43	70.9584	1.47601	0.0643708
11	A11	44	71.2156	1.47056	0.0625022
11	A11	45	71.4729	1.45923	0.0612088
11	A11	46	71.7301	1.45405	0.0607013
11	A11	47	71.9874	1.44382	0.0610362
11	A11	48	72.2446	1.43894	0.0621215
11	A11	49	72.5019	1.43226	0.0637502
11	A11	50	72.7591	1.4191	0.0656546
11	A11	51	73.0164	1.41272	0.0675848
11	A11	52	73.2737	1.40329	0.0693708
11	A11	53	73.5309	1.38906	0.0709355
11	A11	54	73.7882	1.38526	0.0722509
11	A11	55	74.0454	1.37379	0.073291
11	A11	56	74.3027	1.36576	0.0740323
11	A11	57	74.5599	1.34916	0.0744971
11	A11	58	74.8172	1.3403	0.0748037
11	A11	59	75.0745	1.33424	0.0751314
11	A11	60	75.3317	1.3224	0.0756283
11	A11	61	75.589	1.31508	0.0763125
11	A11	62	75.8462	1.30283	0.0770532
11	A11	63	76.1035	1.28968	0.0776353
11	A11	64	76.3607	1.28203	0.0778655
11	A11	65	76.618	1.27061	0.0776481
11	A11	66	76.8752	1.2586	0.0770149
11	A11	67	77.1325	1.25108	0.0761105
11	A11	68	77.3898	1.23723	0.0751603
11	A11	69	77.647	1.22796	0.0744082
11	A11	70	77.9043	1.22361	0.0740541
11	A11	71	78.1615	1.21145	0.0742078
11	A11	72	78.4188	1.20045	0.0748774
11	A11	73	78.676	1.1909	0.0759843
11	A11	74	78.9333	1.17983	0.0773774
11	A11	75	79.1906	1.17376	0.0788368
11	A11	76	79.4478	1.16178	0.0801081
11	A11	77	79.7051	1.14794	0.0809929
11	A11	78	79.9623	1.13283	0.0814535
11	A11	79	80.2196	1.12697	0.0816619
11	A11	80	80.4768	1.11499	0.0819318
11	A11	81	80.7341	1.10524	0.0825761
11	A11	82	80.9913	1.09819	0.0837887
11	A11	83	81.2486	1.08046	0.0856173
11	A11	84	81.5059	1.07193	0.0880246
11	A11	85	81.7631	1.05931	0.0909796
11	A11	86	82.0204	1.0496	0.0945555
11	A11	87	82.2776	1.03505	0.0990973
11	A11	88	82.5349	1.02177	0.105523
11	A11	89	82.7921	1.00739	0.11576
11	A11	90	83.0494	0.988247	0.133134
11	A11	91	83.3066	0.980057	0.162373
11	A11	92	83.5639	0.964939	0.208845
11	A11	93	83.8212	0.951381	0.276815
11	A11	94	84.0784	0.928011	0.366936
11	A11	95	84.3357	0.894368	0.473828
11	A11	96	84.5929	0.842425	0.585048
11	A11	97	84.8502	0.717122	0.682634
11	A11	98	85.1074	0.549917	0.747416
11	A11	99	85.3647	0.377216	0.764808
11	A11	100	85.622	0.223279	0.729716
11	A11	101	85.8792	0.108088	0.648344
11	A11	102	86.1365	0.045428	0.536066
11	A11	103	86.3937	0.0209785	0.412389
11	A11	104	86.651	0.0132243	0.295269
11	A11	105	86.9082	0.00992896	0.196997
11	A11	106	87.1655	0.00849141	0.122796
11	A11	107	87.4227	0.00709743	0.0718994
11	A11	108	87.68	0.00662989	0.0399527
11	A11	109	87.9373	0.00592509	0.0214695
11	A11	110	88.1945	0.00578871	0.0115236
11	A11	111	88.4518	0.00554582	0.00648487
11	A11	112	88.709	0.00533334	0.00404085
11	A11	113	88.9663	0.00510488	0.00287593
11	A11	114	89.2235	0.00473092	0.00230138
11	A11	115	89.4808	0.0044331	0.00197728
11	A11	116	89.7381	0.00395124	0.00174782
11	A11	117	89.9953	0.00395981	0.00155586
11	A11	118	90.2526	0.00441292	0.00139637
11	A11	119	90.5098	0.00330178	0.00128482
11	A11	120	90.7671	0.00390159	0.0012333
11	A11	121	91.0243	0.00359594	0.00123552
11	A11	122	91.2816	0.00367464	0.00126438
11	A11	123	91.5388	0.0029955	0.00128289
11	A11	124	91.7961	0.00253265	0.00126397
11	A11	125	92.0534	0.00254122	0.00120713
11	A11	126	92.3106	0.00281632	0.00113954
11	A11	127	92.5679	0.00264417	0.00109813
11	A11	128	92.8251	0.0027883	0.00110451
11	A11	129	93.0824	0.00226839	0.00115026
11	A11	130	93.3396	0.00168164	0.00120202
11	A11	131	93.5969	0.00195511	0.0012202
11	A11	132	93.8542	0.00170479	0.00117694
11	A11	133	94.1114	0.00156843	0.00106386
11	A11	134	94.3687	0.00122811	0.000890817
11	A11	135	94.6259	0.00106646	0.000680883
11	A11	136	94.8832	0.00138491	0.000464586
12	A12	1	60.1536	1.78937	0.0751837
12	A12	2	60.4109	1.78546	0.0757857
12	A12	3	60.6681	1.77094	0.0765894
12	A12	4	60.9254	1.76475	0.0774274
12	A12	5	61.1826	1.75469	0.0780804
12	A12	6	61.4399	1.74461	0.07834
12	A12	7	61.6971	1.73092	0.0781087
12	A12	8	61.9544	1.71787	0.0774816
12	A12	9	62.2116	1.70941	0.0767355
12	A12	10	62.4689	1.70018	0.0762117
12	A12	11	62.7262	1.68973	0.0761379
12	A12	12	62.9834	1.68537	0.076502
12	A12	13	63.2407	1.66865	0.077059
12	A12	14	63.4979	1.65964	0.0774725
12	A12	15	63.7552	1.65021	0.0775002
12	A12	16	64.0124	1.63522	0.0771258
12	A12	17	64.2697	1.6268	0.0765584
12	A12	18	64.527	1.61568	0.0761021
12	A12	19	64.7842	1.6081	0.0759658
12	A12	20	65.0415	1.60102	0.0761329
12	A12	21	65.2987	1.58873	0.0763672
12	A12	22	65.556	1.57641	0.076359
12	A12	23	65.8132	1.56586	0.0759135
12	A12	24	66.0705	1.55217	0.0750572
12	A12	25	66.3277	1.54663	0.0740027
12	A12	26	66.585	1.53611	0.0730109
12	A12	27	66.8423	1.52736	0.0722455
12	A12	28	67.0995	1.51638	0.0717053
12	A12	29	67.3568	1.50774	0.0712529
12	A12	30	67.614	1.49801	0.0707109
12	A12	31	67.8713	1.48806	0.0699653
12	A12	32	68.1285	1.47847	0.0690252
12	A12	33	68.3858	1.46469	0.0680102
12	A12	34	68.6431	1.46256	0.0670648
12	A12	35	68.9003	1.45204	0.0662635
12	A12	36	69.1576	1.4454	0.0655678
12	A12	37	69.4148	1.43143	0.0648583
12	A12	38	69.6721	1.42448	0.0640087
12	A12	39	69.9293	1.41607	0.0629295
12	A12	40	70.1866	1.40701	0.0615741
12	A12	41	70.4438	1.40198	0.0599289
12	A12	42	70.7011	1.38849	0.0580476
12	A12	43	70.9584	1.38492	0.056109
12	A12	44	71.2156	1.37127	0.0544481
12	A12	45	71.4729	1.37063	0.0534924
12	A12	46	71.7301	1.36193	0.0536044
12	A12	47	71.9874	1.35909	0.0549184
12	A12	48	72.2446	1.35245	0.0572596
12	A12	49	72.5019	1.34125	0.0601992
12	A12	50	72.7591	1.3336	0.0632012
12	A12	51	73.0164	1.3225	0.0657939
12	A12	52	73.2737	1.31772	0.0676935
12	A12	53	73.5309	1.30349	0.0688634
12	A12	54	73.7882	1.2904	0.0694918
12	A12	55	74.0454	1.28615	0.0698981
12	A12	56	74.3027	1.27679	0.0703837
12	A12	57	74.5599	1.26901	0.071103
12	A12	58	74.8172	1.25516	0.072009
12	A12	59	75.0745	1.24916	0.0729049
12	A12	60	75.3317	1.23679	0.0735546
12	A12	61	75.589	1.22438	0.0737919
12	A12	62	75.8462	1.21567	0.0735704
12	A12	63	76.1035	1.20851	0.0729583
12	A12	64	76.3607	1.1944	0.0721046
12	A12	65	76.618	1.18562	0.0711999
12	A12	66	76.8752	1.17757	0.0704396
12	A12	67	77.1325	1.16984	0.0699897
12	A12	68	77.3898	1.15636	0.0699455
12	A12	69	77.647	1.1517	0.0703038
12	A12	70	77.9043	1.1415	0.0709563
12	A12	71	78.1615	1.12967	0.0717222
12	A12	72	78.4188	1.12341	0.0724106
12	A12	73	78.676	1.10839	0.0728934
12	A12	74	78.9333	1.10087	0.0731435
12	A12	75	79.1906	1.09014	0.0732251
12	A12	76	79.4478	1.08156	0.073246
12	A12	77	79.7051	1.07217	0.0733081
12	A12	78	79.9623	1.06125	0.073495
12	A12	79	80.2196	1.05026	0.0738962
12	A12	80	80.4768	1.04069	0.0746195
12	A12	81	80.7341	1.03221	0.0757785
12	A12	82	80.9913	1.02378	0.0774486
12	A12	83	81.2486	1.01119	0.0796321
12	A12	84	81.5059	0.998914	0.0822643
12	A12	85	81.7631	0.990932	0.0852677
12	A12	86	82.0204	0.978287	0.0886707
12	A12	87	82.2776	0.963106	0.0928114
12	A12	88	82.5349	0.953477	0.0986632
12	A12	89	82.7921	0.939021	0.108245
12	A12	90	83.0494	0.923007	0.124953
12	A12	91	83.3066	0.911709	0.15351
12	A12	92	83.5639	0.899748	0.199147
12	A12	93	83.8212	0.887352	0.265834
12	A12	94	84.0784	0.867802	0.353818
12	A12	95	84.3357	0.836101	0.457346
12	A12	96	84.5929	0.771089	0.563881
12	A12	97	84.8502	0.657458	0.655858
12	A12	98	85.1074	0.489544	0.715022
12	A12	99	85.3647	0.324786	0.728004
12	A12	100	85.622	0.176554	0.690827
12	A12	101	85.8792	0.0693814	0.610318
12	A12	102	86.1365	0.0151717	0.501755
12	A12	103	86.3937	-0.00651373	0.383886
12	A12	104	86.651	-0.0143093	0.27352
12	A12	105	86.9082	-0.0171662	0.181794
12	A12	106	87.1655	-0.0191368	0.113091
12	A12	107	87.4227	-0.0206182	0.0662565
12	A12	108	87.68	-0.021351	0.0369685
12	A12	109	87.9373	-0.0213979	0.0200254
12	A12	110	88.1945	-0.0217086	0.0108595
12	A12	111	88.4518	-0.0220067	0.00614812
12	A12	112	88.709	-0.0226174	0.0037895
12	A12	113	88.9663	-0.0225541	0.00259529
12	A12	114	89.2235	-0.022612	0.00195338
12	A12	115	89.4808	-0.0232844	0.0015731
12	A12	116	89.7381	-0.0228552	0.00132673
12	A12	117	89.9953	-0.0233399	0.00116183
12	A12	118	90.2526	-0.0232511	0.00105603
12	A12	119	90.5098	-0.0232341	0.00099566
12	A12	120	90.7671	-0.0237619	0.000967733
12	A12	121	91.0243	-0.0238035	0.000959152
12	A12	122	91.2816	-0.0235089	0.000959062
12	A12	123	91.5388	-0.0239869	0.000961926
12	A12	124	91.7961	-0.0243159	0.00096993
12	A12	125	92.0534	-0.0242711	0.000992473
12	A12	126	92.3106	-0.0241729	0.00104028
12	A12	127	92.5679	-0.0242999	0.00111487
12	A12	128	92.8251	-0.0244628	0.00119986
12	A12	129	93.0824	-0.0248911	0.00126238
12	A12	130	93.3396	-0.0254556	0.00126677
12	A12	131	93.5969	-0.0252666	0.00119257
12	A12	132	93.8542	-0.0255676	0.00104472
12	A12	133	94.1114	-0.0253959	0.000849713
12	A12	134	94.3687	-0.0255825	0.000641963
12	A12	135	94.6259	-0.0256044	0.000450269
12	A12	136	94.8832	-0.0256369	0.000291447
13	A13	1	60.1536	1.88553	0.0786994
13	A13	2	60.4109	1.87345	0.0792687
13	A13	3	60.6681	1.86334	0.0798175
13	A13	4	60.9254	1.85463	0.0802485
13	A13	5	61.1826	1.84541	0.0805414
13	A13	6	61.4399	1.8317	0.0807309
13	A13	7	61.6971	1.81916	0.0808493
13	A13	8	61.9544	1.81252	0.0808709
13	A13	9	62.2116	1.80381	0.0807115
13	A13	10	62.4689	1.78739	0.0802972
13	A13	11	62.7262	1.77709	0.0796555
13	A13	12	62.9834	1.76245	0.078947
13	A13	13	63.2407	1.75982	0.0783963
13	A13	14	63.4979	1.74863	0.0781558
13	A13	15	63.7552	1.73356	0.0782018
13	A13	16	64.0124	1.7282	0.078337
13	A13	17	64.2697	1.7172	0.0782899
13	A13	18	64.527	1.70228	0.0778645
13	A13	19	64.7842	1.69128	0.0770357
13	A13	20	65.0415	1.68383	0.0759602
13	A13	21	65.2987	1.67433	0.0748946
13	A13	22	65.556	1.66131	0.0740744
13	A13	23	65.8132	1.65468	0.0736158
13	A13	24	66.0705	1.64659	0.0734762
13	A13	25	66.3277	1.63404	0.0734898
13	A13	26	66.585	1.62523	0.0734567
13	A13	27	66.8423	1.61306	0.0732372
13	A13	28	67.0995	1.60556	0.0727945
13	A13	29	67.3568	1.59083	0.0721803
13	A13	30	67.614	1.58855	0.0714764
13	A13	31	67.8713	1.57526	0.0707462
13	A13	32	68.1285	1.56575	0.070012
13	A13	33	68.3858	1.55587	0.0692591
13	A13	34	68.6431	1.54563	0.0684368
13	A13	35	68.9003	1.54283	0.0674601
13	A13	36	69.1576	1.52831	0.066236
13	A13	37	69.4148	1.51966	0.064713
13	A13	38	69.6721	1.50828	0.062916
13	A13	39	69.9293	1.50425	0.0609371
13	A13	40	70.1866	1.49402	0.0588767
13	A13	41	70.4438	1.48908	0.0568049
13	A13	42	70.7011	1.48011	0.0547825
13	A13	43	70.9584	1.47003	0.052934
13	A13	44	71.2156	1.46428	0.0514991
13	A13	45	71.4729	1.45886	0.050793
13	A13	46	71.7301	1.45514	0.0510837
13	A13	47	71.9874	1.44732	0.0524587
13	A13	48	72.2446	1.44171	0.0547669
13	A13	49	72.5019	1.43422	0.057661
13	A13	50	72.7591	1.42473	0.0607274
13	A13	51	73.0164	1.41743	0.0636278
13	A13	52	73.2737	1.40518	0.0661978
13	A13	53	73.5309	1.39807	0.0684432
13	A13	54	73.7882	1.38568	0.0704526
13	A13	55	74.0454	1.3809	0.0722755
13	A13	56	74.3027	1.3712	0.0738498
13	A13	57	74.5599	1.35709	0.0750329
13	A13	58	74.8172	1.34608	0.0757036
13	A13	59	75.0745	1.33449	0.0758632
13	A13	60	75.3317	1.32703	0.075645
13	A13	61	75.589	1.31602	0.0752411
13	A13	62	75.8462	1.30634	0.074813
13	A13	63	76.1035	1.29661	0.0744513
13	A13	64	76.3607	1.28674	0.0742069
13	A13	65	76.618	1.27392	0.0741364
13	A13	66	76.8752	1.26592	0.074313
13	A13	67	77.1325	1.25887	0.0747788
13	A13	68	77.3898	1.24659	0.0754817
13	A13	69	77.647	1.2375	0.0762644
13	A13	70	77.9043	1.2273	0.0769212
13	A13	71	78.1615	1.21297	0.0772937
13	A13	72	78.4188	1.20291	0.0773423
13	A13	73	78.676	1.19728	0.0771505
13	A13	74	78.9333	1.1826	0.0768742
13	A13	75	79.1906	1.17263	0.0766787
13	A13	76	79.4478	1.16411	0.0766927
13	A13	77	79.7051	1.15427	0.0770007
13	A13	78	79.9623	1.14331	0.0776668
13	A13	79	80.2196	1.13202	0.078776
13	A13	80	80.4768	1.12253	0.0804655
13	A13	81	80.7341	1.11053	0.0829205
13	A13	82	80.9913	1.10183	0.0863156
13	A13	83	81.2486	1.09103	0.0907277
13	A13	84	81.5059	1.07734	0.0960516
13	A13	85	81.7631	1.06479	0.101995
13	A13	86	82.0204	1.05194	0.108194
13	A13	87	82.2776	1.03302	0.114504
13	A13	88	82.5349	1.01716	0.121456
13	A13	89	82.7921	0.998259	0.130808
13	A13	90	83.0494	0.977554	0.145955
13	A13	91	83.3066	0.965825	0.171905
13	A13	92	83.5639	0.953013	0.214453
13	A13	93	83.8212	0.935731	0.278365
13	A13	94	84.0784	0.913496	0.36481
13	A13	95	84.3357	0.884418	0.468839
13	A13	96	84.5929	0.829193	0.578257
13	A13	97	84.8502	0.710465	0.675084
13	A13	98	85.1074	0.543346	0.739881
13	A13	99	85.3647	0.366513	0.757661
13	A13	100	85.622	0.209361	0.72299
13	A13	101	85.8792	0.0956777	0.641933
13	A13	102	86.1365	0.0351817	0.52993
13	A13	103	86.3937	0.0123236	0.406647
13	A13	104	86.651	0.00500265	0.29015
13	A13	105	86.9082	0.00167405	0.192719
13	A13	106	87.1655	2.61432e-05	0.119473
13	A13	107	87.4227	-0.000167082	0.0695156
13	A13	108	87.68	-0.00105657	0.0383979
13	A13	109	87.9373	-0.0015689	0.0205813
13	A13	110	88.1945	-0.00211101	0.0111199
13	A13	111	88.4518	-0.00241441	0.00638815
13	A13	112	88.709	-0.00308846	0.00410368
13	A13	113	88.9663	-0.00286695	0.00300629
13	A13	114	89.2235	-0.00292514	0.00247228
13	A13	115	89.4808	-0.00338785	0.0022088
13	A13	116	89.7381	-0.00387687	0.00206707
13	A13	117	89.9953	-0.00383755	0.00195598
13	A13	118	90.2526	-0.00469764	0.00181801
13	A13	119	90.5098	-0.00451483	0.00163021
13	A13	120	90.7671	-0.00479372	0.00140591
13	A13	121	91.0243	-0.00502028	0.00118586
13	A13	122	91.2816	-0.00469011	0.00101944
13	A13	123	91.5388	-0.00482869	0.000942142
13	A13	124	91.7961	-0.0049397	0.000958486
13	A13	125	92.0534	-0.00486029	0.00103859
13	A13	126	92.3106	-0.00541635	0.00113158
13	A13	127	92.5679	-0.00607062	0.00119048
13	A13	128	92.8251	-0.00575356	0.00119511
13	A13	129	93.0824	-0.00591412	0.0011591
13	A13	130	93.3396	-0.00620309	0.00111573
13	A13	131	93.5969	-0.00579539	0.00109116
13	A13	132	93.8542	-0.0060713	0.00108288
13	A13	133	94.1114	-0.00646671	0.0010587
13	A13	134	94.3687	-0.00701427	0.000977871
13	A13	135	94.6259	-0.00731564	0.000819984
13	A13	136	94.8832	-0.00680078	0.000601186
14	A14	1	60.1536	1.88735	0.0817625
14	A14	2	60.4109	1.86886	0.0823793
14	A14	3	60.6681	1.85366	0.0827111
14	A14	4	60.9254	1.84874	0.0827538
14	A14	5	61.1826	1.83914	0.0826484
14	A14	6	61.4399	1.82775	0.0825542
14	A14	7	61.6971	1.81491	0.0825348
14	A14	8	61.9544	1.80609	0.0825391
14	A14	9	62.2116	1.79424	0.0824627
14	A14	10	62.4689	1.78158	0.0822428
14	A14	11	62.7262	1.76957	0.0818917
14	A14	12	62.9834	1.75962	0.0814774
14	A14	13	63.2407	1.75347	0.0810705
14	A14	14	63.4979	1.73638	0.08071
14	A14	15	63.7552	1.72681	0.0803976
14	A14	16	64.0124	1.71757	0.0801092
14	A14	17	64.2697	1.70633	0.0798039
14	A14	18	64.527	1.69754	0.0794334
14	A14	19	64.7842	1.68382	0.0789635
14	A14	20	65.0415	1.67456	0.0783914
14	A14	21	65.2987	1.66185	0.0777335
14	A14	22	65.556	1.65363	0.0769938
14	A14	23	65.8132	1.64773	0.0761539
14	A14	24	66.0705	1.63312	0.07521
14	A14	25	66.3277	1.61866	0.0742338
14	A14	26	66.585	1.6122	0.0733698
14	A14	27	66.8423	1.60389	0.0727518
14	A14	28	67.0995	1.59738	0.07239
14	A14	29	67.3568	1.58671	0.0721337
14	A14	30	67.614	1.57287	0.0717643
14	A14	31	67.8713	1.56355	0.0711406
14	A14	32	68.1285	1.55439	0.0702774
14	A14	33	68.3858	1.54477	0.0693059
14	A14	34	68.6431	1.53917	0.0683629
14	A14	35	68.9003	1.52995	0.0674952
14	A14	36	69.1576	1.51652	0.0666459
14	A14	37	69.4148	1.5085	0.0656875
14	A14	38	69.6721	1.50329	0.064469
14	A14	39	69.9293	1.49419	0.062843
14	A14	40	70.1866	1.47867	0.0607082
14	A14	41	70.4438	1.47864	0.0580712
14	A14	42	70.7011	1.46571	0.0551092
14	A14	43	70.9584	1.45705	0.0521985
14	A14	44	71.2156	1.45498	0.0498606
14	A14	45	71.4729	1.44743	0.048628
14	A14	46	71.7301	1.44087	0.048867
14	A14	47	71.9874	1.44076	0.0506312
14	A14	48	72.2446	1.43383	0.0536304
14	A14	49	72.5019	1.42373	0.0573348
14	A14	50	72.7591	1.41564	0.0611648
14	A14	51	73.0164	1.40391	0.0646617
14	A14	52	73.2737	1.39729	0.0675614
14	A14	53	73.5309	1.38801	0.0697765
14	A14	54	73.7882	1.37988	0.0713383
14	A14	55	74.0454	1.36336	0.0723631
14	A14	56	74.3027	1.35561	0.0730227
14	A14	57	74.5599	1.34796	0.0735003
14	A14	58	74.8172	1.34101	0.0739301
14	A14	59	75.0745	1.32324	0.0743478
14	A14	60	75.3317	1.31881	0.0746986
14	A14	61	75.589	1.30711	0.0748916
14	A14	62	75.8462	1.29716	0.0748743
14	A14	63	76.1035	1.28434	0.0746832
14	A14	64	76.3607	1.27666	0.0744389
14	A14	65	76.618	1.2653	0.074299
14	A14	66	76.8752	1.25952	0.0743907
14	A14	67	77.1325	1.24685	0.0747602
14	A14	68	77.3898	1.23646	0.0753668
14	A14	69	77.647	1.22641	0.0761081
14	A14	70	77.9043	1.21881	0.0768489
14	A14	71	78.1615	1.20489	0.0774458
14	A14	72	78.4188	1.1953	0.0777709
14	A14	73	78.676	1.18691	0.0777548
14	A14	74	78.9333	1.17317	0.0774272
14	A14	75	79.1906	1.15977	0.0769338
14	A14	76	79.4478	1.15497	0.0764981
14	A14	77	79.7051	1.14528	0.0763515
14	A14	78	79.9623	1.13536	0.0766758
14	A14	79	80.2196	1.1201	0.0775922
14	A14	80	80.4768	1.11363	0.0791788
14	A14	81	80.7341	1.10463	0.0814892
14	A14	82	80.9913	1.0936	0.0845438
14	A14	83	81.2486	1.08026	0.088312
14	A14	84	81.5059	1.06768	0.0926943
14	A14	85	81.7631	1.05765	0.0975311
14	A14	86	82.0204	1.0434	0.102676
14	A14	87	82.2776	1.02869	0.108211
14	A14	88	82.5349	1.01439	0.114844
14	A14	89	82.7921	0.991078	0.12444
14	A14	90	83.0494	0.977599	0.140437
14	A14	91	83.3066	0.965755	0.167807
14	A14	92	83.5639	0.951151	0.212201
14	A14	93	83.8212	0.938017	0.278109
14	A14	94	84.0784	0.912379	0.366304
14	A14	95	84.3357	0.882274	0.471408
14	A14	96	84.5929	0.828519	0.580907
14	A14	97	84.8502	0.703812	0.676757
14	A14	98	85.1074	0.537327	0.73978
14	A14	99	85.3647	0.360768	0.755514
14	A14	100	85.622	0.209663	0.719119
14	A14	101	85.8792	0.0979777	0.637085
14	A14	102	86.1365	0.0380166	0.524973
14	A14	103	86.3937	0.0146023	0.40228
14	A14	104	86.651	0.00710969	0.286756
14	A14	105	86.9082	0.0047989	0.190372
14	A14	106	87.1655	0.00339699	0.118048
14	A14	107	87.4227	0.00257669	0.0687989
14	A14	108	87.68	0.00181057	0.0381595
14	A14	109	87.9373	0.00126417	0.0206137
14	A14	110	88.1945	-4.13297e-05	0.0112547
14	A14	111	88.4518	0.000550024	0.00650452
14	A14	112	88.709	-0.000366543	0.00412845
14	A14	113	88.9663	0.000170002	0.00290665
14	A14	114	89.2235	-0.000811982	0.00224789
14	A14	115	89.4808	-0.000567818	0.0018895
14	A14	116	89.7381	-0.000799037	0.00171356
14	A14	117	89.9953	-0.000691268	0.00165354
14	A14	118	90.2526	-0.00130745	0.00165693
14	A14	119	90.5098	-0.00124288	0.00167889
14	A14	120	90.7671	-0.00242606	0.00168957
14	A14	121	91.0243	-0.00189591	0.00168048
14	A14	122	91.2816	-0.00176391	0.00165981
14	A14	123	91.5388	-0.00252664	0.00163798
14	A14	124	91.7961	-0.002368	0.00161461
14	A14	125	92.0534	-0.00314327	0.00157736
14	A14	126	92.3106	-0.00305427	0.00151279
14	A14	127	92.5679	-0.00333868	0.00141897
14	A14	128	92.8251	-0.00347571	0.00130957
14	A14	129	93.0824	-0.0032596	0.00120676
14	A14	130	93.3396	-0.00377332	0.00112873
14	A14	131	93.5969	-0.00403897	0.00107889
14	A14	132	93.8542	-0.00336807	0.00104178
14	A14	133	94.1114	-0.00421036	0.000987861
14	A14	134	94.3687	-0.00420169	0.000886918
14	A14	135	94.6259	-0.00502326	0.000725145
14	A14	136	94.8832	-0.0044697	0.000516167
15	A15	1	60.1536	1.89144	0.0803479
15	A15	2	60.4109	1.88651	0.0812072
15	A15	3	60.6681	1.86817	0.0819097
15	A15	4	60.9254	1.86167	0.0823072
15	A15	5	61.1826	1.84775	0.0824095
15	A15	6	61.4399	1.83595	0.082318
15	A15	7	61.6971	1.83429	0.0821103
15	A15	8	61.9544	1.81559	0.0817832
15	A15	9	62.2116	1.80578	0.0813107
15	A15	10	62.4689	1.79406	0.0807452
15	A15	11	62.7262	1.78121	0.0802454
15	A15	12	62.9834	1.77274	0.0799735
15	A15	13	63.2407	1.76722	0.0799404
15	A15	14	63.4979	1.75406	0.0799324
15	A15	15	63.7552	1.74268	0.0796117
15	A15	16	64.0124	1.7294	0.0787256
15	A15	17	64.2697	1.71548	0.0772903
15	A15	18	64.527	1.70911	0.0756093
15	A15	19	64.7842	1.70086	0.0741289
15	A15	20	65.0415	1.68916	0.0732208
15	A15	21	65.2987	1.6837	0.0730255
15	A15	22	65.556	1.67085	0.0734144
15	A15	23	65.8132	1.66566	0.0740887
15	A15	24	66.0705	1.65226	0.0747242
15	A15	25	66.3277	1.63839	0.0750973
15	A15	26	66.585	1.63259	0.075118
15	A15	27	66.8423	1.62015	0.0747919
15	A15	28	67.0995	1.6144	0.0741442
15	A15	29	67.3568	1.59994	0.073199
15	A15	30	67.614	1.58999	0.0720083
15	A15	31	67.8713	1.58259	0.0707056
15	A15	32	68.1285	1.5713	0.0695122
15	A15	33	68.3858	1.56306	0.0686626
15	A15	34	68.6431	1.55322	0.0682846
15	A15	35	68.9003	1.55181	0.0682965
15	A15	36	69.1576	1.53629	0.0684043
15	A15	37	69.4148	1.5287	0.0681921
15	A15	38	69.6721	1.51561	0.0672732
15	A15	39	69.9293	1.51007	0.0654232
15	A15	40	70.1866	1.49727	0.0626422
15	A15	41	70.4438	1.4911	0.0591581
15	A15	42	70.7011	1.48008	0.0553782
15	A15	43	70.9584	1.47618	0.0518188
15	A15	44	71.2156	1.47011	0.0490222
15	A15	45	71.4729	1.46417	0.0474688
15	A15	46	71.7301	1.45907	0.0474832
15	A15	47	71.9874	1.45423	0.049153
15	A15	48	72.2446	1.45017	0.0522733
15	A15	49	72.5019	1.44164	0.0563649
15	A15	50	72.7591	1.43803	0.0607757
15	A15	51	73.0164	1.42142	0.0648547
15	A15	52	73.2737	1.4129	0.0681273
15	A15	53	73.5309	1.40691	0.0703961
15	A15	54	73.7882	1.39126	0.0717374
15	A15	55	74.0454	1.38381	0.0724034
15	A15	56	74.3027	1.3752	0.0727
15	A15	57	74.5599	1.36411	0.0728874
15	A15	58	74.8172	1.3559	0.0731366
15	A15	59	75.0745	1.34472	0.0735294
15	A15	60	75.3317	1.33259	0.0740755
15	A15	61	75.589	1.32959	0.0747218
[truncated: 38,019 more rows]
