# Supplementary material for: Transcriptomic identification of HBx-associated hub genes in hepatocellular carcinoma
Source: PeerJ. 2021 Dec 22;9:e12697. doi: 10.7717/peerj.12697 (PMC8710059; doi:10.7717/peerj.12697)
Supplement: Supplemental Information 15 [file peerj-09-12697-s015.xlsx]

## Sheet: Sample Setup
Block Type	384-Well Block
Calibration Background is expired	Yes
Calibration Background performed on	10-12-2018 11:47:46 PDT
Calibration FAM is expired	Yes
Calibration FAM performed on	10-23-2018 10:23:19 PDT
Calibration MELTDOCTOR is expired	Yes
Calibration MELTDOCTOR performed on	09-26-2017 21:22:46 PDT
Calibration NED is expired	Yes
Calibration NED performed on	10-23-2018 10:33:14 PDT
Calibration ROI is expired	Yes
Calibration ROI performed on	10-12-2018 09:37:21 PDT
Calibration ROX is expired	Yes
Calibration ROX performed on	10-23-2018 10:07:21 PDT
Calibration SYBR is expired	Yes
Calibration SYBR performed on	10-23-2018 09:57:53 PDT
Calibration TAMRA is expired	Yes
Calibration TAMRA performed on	10-23-2018 10:45:25 PDT
Calibration Uniformity is expired	Yes
Calibration Uniformity performed on	10-12-2018 10:06:59 PDT
Calibration VIC is expired	Yes
Calibration VIC performed on	10-23-2018 10:54:25 PDT
Chemistry	SYBR_GREEN
Date Created	02-07-2021 22:20:48 PST
Experiment File Name	D:\NZZ\2021-02-07 205722.eds
Experiment Name	2021-02-07 205722
Experiment Run End Time	02-07-2021 15:32:51 PST
Experiment Type	Comparative Cт (ΔΔCт)
Instrument Name	285880860
Instrument Serial Number	285880860
Instrument Type	QuantStudio 12K Flex
Passive Reference	ROX
Quantification Cycle Method	Ct
Signal Smoothing On	true
Stage/ Cycle where Analysis is performed	Stage 2, Step 2
Well	Well Position	Sample Name	Sample Color	Biogroup Name	Biogroup Color	Target Name	Target Color	Task	Reporter	Quencher	Quantity	Comments
1	A1	vec-1	RGB(176,23,31)			mCYC	RGB(176,23,31)	UNKNOWN	SYBR	None
2	A2	vec-1	RGB(176,23,31)			mCYC	RGB(176,23,31)	UNKNOWN	SYBR	None
3	A3	vec-1	RGB(176,23,31)			mCYC	RGB(176,23,31)	UNKNOWN	SYBR	None
4	A4	vec-4	RGB(0,0,255)			mCYC	RGB(176,23,31)	UNKNOWN	SYBR	None
5	A5	vec-4	RGB(0,0,255)			mCYC	RGB(176,23,31)	UNKNOWN	SYBR	None
6	A6	vec-4	RGB(0,0,255)			mCYC	RGB(176,23,31)	UNKNOWN	SYBR	None
7	A7	vec-6	RGB(0,139,69)			mCYC	RGB(176,23,31)	UNKNOWN	SYBR	None
8	A8	vec-6	RGB(0,139,69)			mCYC	RGB(176,23,31)	UNKNOWN	SYBR	None
9	A9	vec-6	RGB(0,139,69)			mCYC	RGB(176,23,31)	UNKNOWN	SYBR	None
10	A10	vec-7	RGB(255,127,0)			mCYC	RGB(176,23,31)	UNKNOWN	SYBR	None
11	A11	vec-7	RGB(255,127,0)			mCYC	RGB(176,23,31)	UNKNOWN	SYBR	None
12	A12	vec-7	RGB(255,127,0)			mCYC	RGB(176,23,31)	UNKNOWN	SYBR	None
13	A13	HBx-2	RGB(139,137,112)			mCYC	RGB(176,23,31)	UNKNOWN	SYBR	None
14	A14	HBx-2	RGB(139,137,112)			mCYC	RGB(176,23,31)	UNKNOWN	SYBR	None
15	A15	HBx-2	RGB(139,137,112)			mCYC	RGB(176,23,31)	UNKNOWN	SYBR	None
16	A16	HBx-3	RGB(238,121,66)			mCYC	RGB(176,23,31)	UNKNOWN	SYBR	None
17	A17	HBx-3	RGB(238,121,66)			mCYC	RGB(176,23,31)	UNKNOWN	SYBR	None
18	A18	HBx-3	RGB(238,121,66)			mCYC	RGB(176,23,31)	UNKNOWN	SYBR	None
19	A19	HBx-5	RGB(142,56,142)			mCYC	RGB(176,23,31)	UNKNOWN	SYBR	None
20	A20	HBx-5	RGB(142,56,142)			mCYC	RGB(176,23,31)	UNKNOWN	SYBR	None
21	A21	HBx-5	RGB(142,56,142)			mCYC	RGB(176,23,31)	UNKNOWN	SYBR	None
22	A22	HBx-8	RGB(198,113,113)			mCYC	RGB(176,23,31)	UNKNOWN	SYBR	None
23	A23	HBx-8	RGB(198,113,113)			mCYC	RGB(176,23,31)	UNKNOWN	SYBR	None
24	A24	HBx-8	RGB(198,113,113)			mCYC	RGB(176,23,31)	UNKNOWN	SYBR	None
25	B1	vec-1	RGB(176,23,31)			mGNAL	RGB(0,0,255)	UNKNOWN	SYBR	None
26	B2	vec-1	RGB(176,23,31)			mGNAL	RGB(0,0,255)	UNKNOWN	SYBR	None
27	B3	vec-1	RGB(176,23,31)			mGNAL	RGB(0,0,255)	UNKNOWN	SYBR	None
28	B4	vec-4	RGB(0,0,255)			mGNAL	RGB(0,0,255)	UNKNOWN	SYBR	None
29	B5	vec-4	RGB(0,0,255)			mGNAL	RGB(0,0,255)	UNKNOWN	SYBR	None
30	B6	vec-4	RGB(0,0,255)			mGNAL	RGB(0,0,255)	UNKNOWN	SYBR	None
31	B7	vec-6	RGB(0,139,69)			mGNAL	RGB(0,0,255)	UNKNOWN	SYBR	None
32	B8	vec-6	RGB(0,139,69)			mGNAL	RGB(0,0,255)	UNKNOWN	SYBR	None
33	B9	vec-6	RGB(0,139,69)			mGNAL	RGB(0,0,255)	UNKNOWN	SYBR	None
34	B10	vec-7	RGB(255,127,0)			mGNAL	RGB(0,0,255)	UNKNOWN	SYBR	None
35	B11	vec-7	RGB(255,127,0)			mGNAL	RGB(0,0,255)	UNKNOWN	SYBR	None
36	B12	vec-7	RGB(255,127,0)			mGNAL	RGB(0,0,255)	UNKNOWN	SYBR	None
37	B13	HBx-2	RGB(139,137,112)			mGNAL	RGB(0,0,255)	UNKNOWN	SYBR	None
38	B14	HBx-2	RGB(139,137,112)			mGNAL	RGB(0,0,255)	UNKNOWN	SYBR	None
39	B15	HBx-2	RGB(139,137,112)			mGNAL	RGB(0,0,255)	UNKNOWN	SYBR	None
40	B16	HBx-3	RGB(238,121,66)			mGNAL	RGB(0,0,255)	UNKNOWN	SYBR	None
41	B17	HBx-3	RGB(238,121,66)			mGNAL	RGB(0,0,255)	UNKNOWN	SYBR	None
42	B18	HBx-3	RGB(238,121,66)			mGNAL	RGB(0,0,255)	UNKNOWN	SYBR	None
43	B19	HBx-5	RGB(142,56,142)			mGNAL	RGB(0,0,255)	UNKNOWN	SYBR	None
44	B20	HBx-5	RGB(142,56,142)			mGNAL	RGB(0,0,255)	UNKNOWN	SYBR	None
45	B21	HBx-5	RGB(142,56,142)			mGNAL	RGB(0,0,255)	UNKNOWN	SYBR	None
46	B22	HBx-8	RGB(198,113,113)			mGNAL	RGB(0,0,255)	UNKNOWN	SYBR	None
47	B23	HBx-8	RGB(198,113,113)			mGNAL	RGB(0,0,255)	UNKNOWN	SYBR	None
48	B24	HBx-8	RGB(198,113,113)			mGNAL	RGB(0,0,255)	UNKNOWN	SYBR	None
49	C1	vec-1	RGB(176,23,31)			mFAM110C	RGB(0,139,69)	UNKNOWN	SYBR	None
50	C2	vec-1	RGB(176,23,31)			mFAM110C	RGB(0,139,69)	UNKNOWN	SYBR	None
51	C3	vec-1	RGB(176,23,31)			mFAM110C	RGB(0,139,69)	UNKNOWN	SYBR	None
52	C4	vec-4	RGB(0,0,255)			mFAM110C	RGB(0,139,69)	UNKNOWN	SYBR	None
53	C5	vec-4	RGB(0,0,255)			mFAM110C	RGB(0,139,69)	UNKNOWN	SYBR	None
54	C6	vec-4	RGB(0,0,255)			mFAM110C	RGB(0,139,69)	UNKNOWN	SYBR	None
55	C7	vec-6	RGB(0,139,69)			mFAM110C	RGB(0,139,69)	UNKNOWN	SYBR	None
56	C8	vec-6	RGB(0,139,69)			mFAM110C	RGB(0,139,69)	UNKNOWN	SYBR	None
57	C9	vec-6	RGB(0,139,69)			mFAM110C	RGB(0,139,69)	UNKNOWN	SYBR	None
58	C10	vec-7	RGB(255,127,0)			mFAM110C	RGB(0,139,69)	UNKNOWN	SYBR	None
59	C11	vec-7	RGB(255,127,0)			mFAM110C	RGB(0,139,69)	UNKNOWN	SYBR	None
60	C12	vec-7	RGB(255,127,0)			mFAM110C	RGB(0,139,69)	UNKNOWN	SYBR	None
61	C13	HBx-2	RGB(139,137,112)			mFAM110C	RGB(0,139,69)	UNKNOWN	SYBR	None
62	C14	HBx-2	RGB(139,137,112)			mFAM110C	RGB(0,139,69)	UNKNOWN	SYBR	None
63	C15	HBx-2	RGB(139,137,112)			mFAM110C	RGB(0,139,69)	UNKNOWN	SYBR	None
64	C16	HBx-3	RGB(238,121,66)			mFAM110C	RGB(0,139,69)	UNKNOWN	SYBR	None
65	C17	HBx-3	RGB(238,121,66)			mFAM110C	RGB(0,139,69)	UNKNOWN	SYBR	None
66	C18	HBx-3	RGB(238,121,66)			mFAM110C	RGB(0,139,69)	UNKNOWN	SYBR	None
67	C19	HBx-5	RGB(142,56,142)			mFAM110C	RGB(0,139,69)	UNKNOWN	SYBR	None
68	C20	HBx-5	RGB(142,56,142)			mFAM110C	RGB(0,139,69)	UNKNOWN	SYBR	None
69	C21	HBx-5	RGB(142,56,142)			mFAM110C	RGB(0,139,69)	UNKNOWN	SYBR	None
70	C22	HBx-8	RGB(198,113,113)			mFAM110C	RGB(0,139,69)	UNKNOWN	SYBR	None
71	C23	HBx-8	RGB(198,113,113)			mFAM110C	RGB(0,139,69)	UNKNOWN	SYBR	None
72	C24	HBx-8	RGB(198,113,113)			mFAM110C	RGB(0,139,69)	UNKNOWN	SYBR	None
73	D1	vec-1	RGB(176,23,31)			mRGS5	RGB(238,238,0)	UNKNOWN	SYBR	None
74	D2	vec-1	RGB(176,23,31)			mRGS5	RGB(238,238,0)	UNKNOWN	SYBR	None
75	D3	vec-1	RGB(176,23,31)			mRGS5	RGB(238,238,0)	UNKNOWN	SYBR	None
76	D4	vec-4	RGB(0,0,255)			mRGS5	RGB(238,238,0)	UNKNOWN	SYBR	None
77	D5	vec-4	RGB(0,0,255)			mRGS5	RGB(238,238,0)	UNKNOWN	SYBR	None
78	D6	vec-4	RGB(0,0,255)			mRGS5	RGB(238,238,0)	UNKNOWN	SYBR	None
79	D7	vec-6	RGB(0,139,69)			mRGS5	RGB(238,238,0)	UNKNOWN	SYBR	None
80	D8	vec-6	RGB(0,139,69)			mRGS5	RGB(238,238,0)	UNKNOWN	SYBR	None
81	D9	vec-6	RGB(0,139,69)			mRGS5	RGB(238,238,0)	UNKNOWN	SYBR	None
82	D10	vec-7	RGB(255,127,0)			mRGS5	RGB(238,238,0)	UNKNOWN	SYBR	None
83	D11	vec-7	RGB(255,127,0)			mRGS5	RGB(238,238,0)	UNKNOWN	SYBR	None
84	D12	vec-7	RGB(255,127,0)			mRGS5	RGB(238,238,0)	UNKNOWN	SYBR	None
85	D13	HBx-2	RGB(139,137,112)			mRGS5	RGB(238,238,0)	UNKNOWN	SYBR	None
86	D14	HBx-2	RGB(139,137,112)			mRGS5	RGB(238,238,0)	UNKNOWN	SYBR	None
87	D15	HBx-2	RGB(139,137,112)			mRGS5	RGB(238,238,0)	UNKNOWN	SYBR	None
88	D16	HBx-3	RGB(238,121,66)			mRGS5	RGB(238,238,0)	UNKNOWN	SYBR	None
89	D17	HBx-3	RGB(238,121,66)			mRGS5	RGB(238,238,0)	UNKNOWN	SYBR	None
90	D18	HBx-3	RGB(238,121,66)			mRGS5	RGB(238,238,0)	UNKNOWN	SYBR	None
91	D19	HBx-5	RGB(142,56,142)			mRGS5	RGB(238,238,0)	UNKNOWN	SYBR	None
92	D20	HBx-5	RGB(142,56,142)			mRGS5	RGB(238,238,0)	UNKNOWN	SYBR	None
93	D21	HBx-5	RGB(142,56,142)			mRGS5	RGB(238,238,0)	UNKNOWN	SYBR	None
94	D22	HBx-8	RGB(198,113,113)			mRGS5	RGB(238,238,0)	UNKNOWN	SYBR	None
95	D23	HBx-8	RGB(198,113,113)			mRGS5	RGB(238,238,0)	UNKNOWN	SYBR	None
96	D24	HBx-8	RGB(198,113,113)			mRGS5	RGB(238,238,0)	UNKNOWN	SYBR	None
97	E1	vec-1	RGB(176,23,31)			mSERPTNE1	RGB(139,137,112)	UNKNOWN	SYBR	None
98	E2	vec-1	RGB(176,23,31)			mSERPTNE1	RGB(139,137,112)	UNKNOWN	SYBR	None
99	E3	vec-1	RGB(176,23,31)			mSERPTNE1	RGB(139,137,112)	UNKNOWN	SYBR	None
100	E4	vec-4	RGB(0,0,255)			mSERPTNE1	RGB(139,137,112)	UNKNOWN	SYBR	None
101	E5	vec-4	RGB(0,0,255)			mSERPTNE1	RGB(139,137,112)	UNKNOWN	SYBR	None
102	E6	vec-4	RGB(0,0,255)			mSERPTNE1	RGB(139,137,112)	UNKNOWN	SYBR	None
103	E7	vec-6	RGB(0,139,69)			mSERPTNE1	RGB(139,137,112)	UNKNOWN	SYBR	None
104	E8	vec-6	RGB(0,139,69)			mSERPTNE1	RGB(139,137,112)	UNKNOWN	SYBR	None
105	E9	vec-6	RGB(0,139,69)			mSERPTNE1	RGB(139,137,112)	UNKNOWN	SYBR	None
106	E10	vec-7	RGB(255,127,0)			mSERPTNE1	RGB(139,137,112)	UNKNOWN	SYBR	None
107	E11	vec-7	RGB(255,127,0)			mSERPTNE1	RGB(139,137,112)	UNKNOWN	SYBR	None
108	E12	vec-7	RGB(255,127,0)			mSERPTNE1	RGB(139,137,112)	UNKNOWN	SYBR	None
109	E13	HBx-2	RGB(139,137,112)			mSERPTNE1	RGB(139,137,112)	UNKNOWN	SYBR	None
110	E14	HBx-2	RGB(139,137,112)			mSERPTNE1	RGB(139,137,112)	UNKNOWN	SYBR	None
111	E15	HBx-2	RGB(139,137,112)			mSERPTNE1	RGB(139,137,112)	UNKNOWN	SYBR	None
112	E16	HBx-3	RGB(238,121,66)			mSERPTNE1	RGB(139,137,112)	UNKNOWN	SYBR	None
113	E17	HBx-3	RGB(238,121,66)			mSERPTNE1	RGB(139,137,112)	UNKNOWN	SYBR	None
114	E18	HBx-3	RGB(238,121,66)			mSERPTNE1	RGB(139,137,112)	UNKNOWN	SYBR	None
115	E19	HBx-5	RGB(142,56,142)			mSERPTNE1	RGB(139,137,112)	UNKNOWN	SYBR	None
116	E20	HBx-5	RGB(142,56,142)			mSERPTNE1	RGB(139,137,112)	UNKNOWN	SYBR	None
117	E21	HBx-5	RGB(142,56,142)			mSERPTNE1	RGB(139,137,112)	UNKNOWN	SYBR	None
118	E22	HBx-8	RGB(198,113,113)			mSERPTNE1	RGB(139,137,112)	UNKNOWN	SYBR	None
119	E23	HBx-8	RGB(198,113,113)			mSERPTNE1	RGB(139,137,112)	UNKNOWN	SYBR	None
120	E24	HBx-8	RGB(198,113,113)			mSERPTNE1	RGB(139,137,112)	UNKNOWN	SYBR	None
121	F1	vec-1	RGB(176,23,31)			HBx	RGB(238,121,66)	UNKNOWN	SYBR	None
122	F2	vec-1	RGB(176,23,31)			HBx	RGB(238,121,66)	UNKNOWN	SYBR	None
123	F3	vec-1	RGB(176,23,31)			HBx	RGB(238,121,66)	UNKNOWN	SYBR	None
124	F4	vec-4	RGB(0,0,255)			HBx	RGB(238,121,66)	UNKNOWN	SYBR	None
125	F5	vec-4	RGB(0,0,255)			HBx	RGB(238,121,66)	UNKNOWN	SYBR	None
126	F6	vec-4	RGB(0,0,255)			HBx	RGB(238,121,66)	UNKNOWN	SYBR	None
127	F7	vec-6	RGB(0,139,69)			HBx	RGB(238,121,66)	UNKNOWN	SYBR	None
128	F8	vec-6	RGB(0,139,69)			HBx	RGB(238,121,66)	UNKNOWN	SYBR	None
129	F9	vec-6	RGB(0,139,69)			HBx	RGB(238,121,66)	UNKNOWN	SYBR	None
130	F10	vec-7	RGB(255,127,0)			HBx	RGB(238,121,66)	UNKNOWN	SYBR	None
131	F11	vec-7	RGB(255,127,0)			HBx	RGB(238,121,66)	UNKNOWN	SYBR	None
132	F12	vec-7	RGB(255,127,0)			HBx	RGB(238,121,66)	UNKNOWN	SYBR	None
133	F13	HBx-2	RGB(139,137,112)			HBx	RGB(238,121,66)	UNKNOWN	SYBR	None
134	F14	HBx-2	RGB(139,137,112)			HBx	RGB(238,121,66)	UNKNOWN	SYBR	None
135	F15	HBx-2	RGB(139,137,112)			HBx	RGB(238,121,66)	UNKNOWN	SYBR	None
136	F16	HBx-3	RGB(238,121,66)			HBx	RGB(238,121,66)	UNKNOWN	SYBR	None
137	F17	HBx-3	RGB(238,121,66)			HBx	RGB(238,121,66)	UNKNOWN	SYBR	None
138	F18	HBx-3	RGB(238,121,66)			HBx	RGB(238,121,66)	UNKNOWN	SYBR	None
139	F19	HBx-5	RGB(142,56,142)			HBx	RGB(238,121,66)	UNKNOWN	SYBR	None
140	F20	HBx-5	RGB(142,56,142)			HBx	RGB(238,121,66)	UNKNOWN	SYBR	None
141	F21	HBx-5	RGB(142,56,142)			HBx	RGB(238,121,66)	UNKNOWN	SYBR	None
142	F22	HBx-8	RGB(198,113,113)			HBx	RGB(238,121,66)	UNKNOWN	SYBR	None
143	F23	HBx-8	RGB(198,113,113)			HBx	RGB(238,121,66)	UNKNOWN	SYBR	None
144	F24	HBx-8	RGB(198,113,113)			HBx	RGB(238,121,66)	UNKNOWN	SYBR	None
145	G1	vec-1	RGB(176,23,31)			mCPEB3	RGB(142,56,142)	UNKNOWN	SYBR	None
146	G2	vec-1	RGB(176,23,31)			mCPEB3	RGB(142,56,142)	UNKNOWN	SYBR	None
147	G3	vec-1	RGB(176,23,31)			mCPEB3	RGB(142,56,142)	UNKNOWN	SYBR	None
148	G4	vec-4	RGB(0,0,255)			mCPEB3	RGB(142,56,142)	UNKNOWN	SYBR	None
149	G5	vec-4	RGB(0,0,255)			mCPEB3	RGB(142,56,142)	UNKNOWN	SYBR	None
150	G6	vec-4	RGB(0,0,255)			mCPEB3	RGB(142,56,142)	UNKNOWN	SYBR	None
151	G7	vec-6	RGB(0,139,69)			mCPEB3	RGB(142,56,142)	UNKNOWN	SYBR	None
152	G8	vec-6	RGB(0,139,69)			mCPEB3	RGB(142,56,142)	UNKNOWN	SYBR	None
153	G9	vec-6	RGB(0,139,69)			mCPEB3	RGB(142,56,142)	UNKNOWN	SYBR	None
154	G10	vec-7	RGB(255,127,0)			mCPEB3	RGB(142,56,142)	UNKNOWN	SYBR	None
155	G11	vec-7	RGB(255,127,0)			mCPEB3	RGB(142,56,142)	UNKNOWN	SYBR	None
156	G12	vec-7	RGB(255,127,0)			mCPEB3	RGB(142,56,142)	UNKNOWN	SYBR	None
157	G13	HBx-2	RGB(139,137,112)			mCPEB3	RGB(142,56,142)	UNKNOWN	SYBR	None
158	G14	HBx-2	RGB(139,137,112)			mCPEB3	RGB(142,56,142)	UNKNOWN	SYBR	None
159	G15	HBx-2	RGB(139,137,112)			mCPEB3	RGB(142,56,142)	UNKNOWN	SYBR	None
160	G16	HBx-3	RGB(238,121,66)			mCPEB3	RGB(142,56,142)	UNKNOWN	SYBR	None
161	G17	HBx-3	RGB(238,121,66)			mCPEB3	RGB(142,56,142)	UNKNOWN	SYBR	None
162	G18	HBx-3	RGB(238,121,66)			mCPEB3	RGB(142,56,142)	UNKNOWN	SYBR	None
163	G19	HBx-5	RGB(142,56,142)			mCPEB3	RGB(142,56,142)	UNKNOWN	SYBR	None
164	G20	HBx-5	RGB(142,56,142)			mCPEB3	RGB(142,56,142)	UNKNOWN	SYBR	None
165	G21	HBx-5	RGB(142,56,142)			mCPEB3	RGB(142,56,142)	UNKNOWN	SYBR	None
166	G22	HBx-8	RGB(198,113,113)			mCPEB3	RGB(142,56,142)	UNKNOWN	SYBR	None
167	G23	HBx-8	RGB(198,113,113)			mCPEB3	RGB(142,56,142)	UNKNOWN	SYBR	None
168	G24	HBx-8	RGB(198,113,113)			mCPEB3	RGB(142,56,142)	UNKNOWN	SYBR	None
169	H1	vec-1	RGB(176,23,31)			mARG1	RGB(198,113,113)	UNKNOWN	SYBR	None
170	H2	vec-1	RGB(176,23,31)			mARG1	RGB(198,113,113)	UNKNOWN	SYBR	None
171	H3	vec-1	RGB(176,23,31)			mARG1	RGB(198,113,113)	UNKNOWN	SYBR	None
172	H4	vec-4	RGB(0,0,255)			mARG1	RGB(198,113,113)	UNKNOWN	SYBR	None
173	H5	vec-4	RGB(0,0,255)			mARG1	RGB(198,113,113)	UNKNOWN	SYBR	None
174	H6	vec-4	RGB(0,0,255)			mARG1	RGB(198,113,113)	UNKNOWN	SYBR	None
175	H7	vec-6	RGB(0,139,69)			mARG1	RGB(198,113,113)	UNKNOWN	SYBR	None
176	H8	vec-6	RGB(0,139,69)			mARG1	RGB(198,113,113)	UNKNOWN	SYBR	None
177	H9	vec-6	RGB(0,139,69)			mARG1	RGB(198,113,113)	UNKNOWN	SYBR	None
178	H10	vec-7	RGB(255,127,0)			mARG1	RGB(198,113,113)	UNKNOWN	SYBR	None
179	H11	vec-7	RGB(255,127,0)			mARG1	RGB(198,113,113)	UNKNOWN	SYBR	None
180	H12	vec-7	RGB(255,127,0)			mARG1	RGB(198,113,113)	UNKNOWN	SYBR	None
181	H13	HBx-2	RGB(139,137,112)			mARG1	RGB(198,113,113)	UNKNOWN	SYBR	None
182	H14	HBx-2	RGB(139,137,112)			mARG1	RGB(198,113,113)	UNKNOWN	SYBR	None
183	H15	HBx-2	RGB(139,137,112)			mARG1	RGB(198,113,113)	UNKNOWN	SYBR	None
184	H16	HBx-3	RGB(238,121,66)			mARG1	RGB(198,113,113)	UNKNOWN	SYBR	None
185	H17	HBx-3	RGB(238,121,66)			mARG1	RGB(198,113,113)	UNKNOWN	SYBR	None
186	H18	HBx-3	RGB(238,121,66)			mARG1	RGB(198,113,113)	UNKNOWN	SYBR	None
187	H19	HBx-5	RGB(142,56,142)			mARG1	RGB(198,113,113)	UNKNOWN	SYBR	None
188	H20	HBx-5	RGB(142,56,142)			mARG1	RGB(198,113,113)	UNKNOWN	SYBR	None
189	H21	HBx-5	RGB(142,56,142)			mARG1	RGB(198,113,113)	UNKNOWN	SYBR	None
190	H22	HBx-8	RGB(198,113,113)			mARG1	RGB(198,113,113)	UNKNOWN	SYBR	None
191	H23	HBx-8	RGB(198,113,113)			mARG1	RGB(198,113,113)	UNKNOWN	SYBR	None
192	H24	HBx-8	RGB(198,113,113)			mARG1	RGB(198,113,113)	UNKNOWN	SYBR	None
193	I1	vec-1	RGB(176,23,31)			mALDOB	RGB(0,245,255)	UNKNOWN	SYBR	None
194	I2	vec-1	RGB(176,23,31)			mALDOB	RGB(0,245,255)	UNKNOWN	SYBR	None
195	I3	vec-1	RGB(176,23,31)			mALDOB	RGB(0,245,255)	UNKNOWN	SYBR	None
196	I4	vec-4	RGB(0,0,255)			mALDOB	RGB(0,245,255)	UNKNOWN	SYBR	None
197	I5	vec-4	RGB(0,0,255)			mALDOB	RGB(0,245,255)	UNKNOWN	SYBR	None
198	I6	vec-4	RGB(0,0,255)			mALDOB	RGB(0,245,255)	UNKNOWN	SYBR	None
199	I7	vec-6	RGB(0,139,69)			mALDOB	RGB(0,245,255)	UNKNOWN	SYBR	None
200	I8	vec-6	RGB(0,139,69)			mALDOB	RGB(0,245,255)	UNKNOWN	SYBR	None
201	I9	vec-6	RGB(0,139,69)			mALDOB	RGB(0,245,255)	UNKNOWN	SYBR	None
202	I10	vec-7	RGB(255,127,0)			mALDOB	RGB(0,245,255)	UNKNOWN	SYBR	None
203	I11	vec-7	RGB(255,127,0)			mALDOB	RGB(0,245,255)	UNKNOWN	SYBR	None
204	I12	vec-7	RGB(255,127,0)			mALDOB	RGB(0,245,255)	UNKNOWN	SYBR	None
205	I13	HBx-2	RGB(139,137,112)			mALDOB	RGB(0,245,255)	UNKNOWN	SYBR	None
206	I14	HBx-2	RGB(139,137,112)			mALDOB	RGB(0,245,255)	UNKNOWN	SYBR	None
207	I15	HBx-2	RGB(139,137,112)			mALDOB	RGB(0,245,255)	UNKNOWN	SYBR	None
208	I16	HBx-3	RGB(238,121,66)			mALDOB	RGB(0,245,255)	UNKNOWN	SYBR	None
209	I17	HBx-3	RGB(238,121,66)			mALDOB	RGB(0,245,255)	UNKNOWN	SYBR	None
210	I18	HBx-3	RGB(238,121,66)			mALDOB	RGB(0,245,255)	UNKNOWN	SYBR	None
211	I19	HBx-5	RGB(142,56,142)			mALDOB	RGB(0,245,255)	UNKNOWN	SYBR	None
212	I20	HBx-5	RGB(142,56,142)			mALDOB	RGB(0,245,255)	UNKNOWN	SYBR	None
213	I21	HBx-5	RGB(142,56,142)			mALDOB	RGB(0,245,255)	UNKNOWN	SYBR	None
214	I22	HBx-8	RGB(198,113,113)			mALDOB	RGB(0,245,255)	UNKNOWN	SYBR	None
215	I23	HBx-8	RGB(198,113,113)			mALDOB	RGB(0,245,255)	UNKNOWN	SYBR	None
216	I24	HBx-8	RGB(198,113,113)			mALDOB	RGB(0,245,255)	UNKNOWN	SYBR	None
217	J1	vec-1	RGB(176,23,31)			mALDH8A1	RGB(238,220,130)	UNKNOWN	SYBR	None
218	J2	vec-1	RGB(176,23,31)			mALDH8A1	RGB(238,220,130)	UNKNOWN	SYBR	None
219	J3	vec-1	RGB(176,23,31)			mALDH8A1	RGB(238,220,130)	UNKNOWN	SYBR	None
220	J4	vec-4	RGB(0,0,255)			mALDH8A1	RGB(238,220,130)	UNKNOWN	SYBR	None
221	J5	vec-4	RGB(0,0,255)			mALDH8A1	RGB(238,220,130)	UNKNOWN	SYBR	None
222	J6	vec-4	RGB(0,0,255)			mALDH8A1	RGB(238,220,130)	UNKNOWN	SYBR	None
223	J7	vec-6	RGB(0,139,69)			mALDH8A1	RGB(238,220,130)	UNKNOWN	SYBR	None
224	J8	vec-6	RGB(0,139,69)			mALDH8A1	RGB(238,220,130)	UNKNOWN	SYBR	None
225	J9	vec-6	RGB(0,139,69)			mALDH8A1	RGB(238,220,130)	UNKNOWN	SYBR	None
226	J10	vec-7	RGB(255,127,0)			mALDH8A1	RGB(238,220,130)	UNKNOWN	SYBR	None
227	J11	vec-7	RGB(255,127,0)			mALDH8A1	RGB(238,220,130)	UNKNOWN	SYBR	None
228	J12	vec-7	RGB(255,127,0)			mALDH8A1	RGB(238,220,130)	UNKNOWN	SYBR	None
229	J13	HBx-2	RGB(139,137,112)			mALDH8A1	RGB(238,220,130)	UNKNOWN	SYBR	None
230	J14	HBx-2	RGB(139,137,112)			mALDH8A1	RGB(238,220,130)	UNKNOWN	SYBR	None
231	J15	HBx-2	RGB(139,137,112)			mALDH8A1	RGB(238,220,130)	UNKNOWN	SYBR	None
232	J16	HBx-3	RGB(238,121,66)			mALDH8A1	RGB(238,220,130)	UNKNOWN	SYBR	None
233	J17	HBx-3	RGB(238,121,66)			mALDH8A1	RGB(238,220,130)	UNKNOWN	SYBR	None
234	J18	HBx-3	RGB(238,121,66)			mALDH8A1	RGB(238,220,130)	UNKNOWN	SYBR	None
235	J19	HBx-5	RGB(142,56,142)			mALDH8A1	RGB(238,220,130)	UNKNOWN	SYBR	None
236	J20	HBx-5	RGB(142,56,142)			mALDH8A1	RGB(238,220,130)	UNKNOWN	SYBR	None
237	J21	HBx-5	RGB(142,56,142)			mALDH8A1	RGB(238,220,130)	UNKNOWN	SYBR	None
238	J22	HBx-8	RGB(198,113,113)			mALDH8A1	RGB(238,220,130)	UNKNOWN	SYBR	None
239	J23	HBx-8	RGB(198,113,113)			mALDH8A1	RGB(238,220,130)	UNKNOWN	SYBR	None
240	J24	HBx-8	RGB(198,113,113)			mALDH8A1	RGB(238,220,130)	UNKNOWN	SYBR	None
241	K1	vec-1	RGB(176,23,31)			mPALM2	RGB(255,127,0)	UNKNOWN	SYBR	None
242	K2	vec-1	RGB(176,23,31)			mPALM2	RGB(255,127,0)	UNKNOWN	SYBR	None
243	K3	vec-1	RGB(176,23,31)			mPALM2	RGB(255,127,0)	UNKNOWN	SYBR	None
244	K4	vec-4	RGB(0,0,255)			mPALM2	RGB(255,127,0)	UNKNOWN	SYBR	None
245	K5	vec-4	RGB(0,0,255)			mPALM2	RGB(255,127,0)	UNKNOWN	SYBR	None
246	K6	vec-4	RGB(0,0,255)			mPALM2	RGB(255,127,0)	UNKNOWN	SYBR	None
247	K7	vec-6	RGB(0,139,69)			mPALM2	RGB(255,127,0)	UNKNOWN	SYBR	None
248	K8	vec-6	RGB(0,139,69)			mPALM2	RGB(255,127,0)	UNKNOWN	SYBR	None
249	K9	vec-6	RGB(0,139,69)			mPALM2	RGB(255,127,0)	UNKNOWN	SYBR	None
250	K10	vec-7	RGB(255,127,0)			mPALM2	RGB(255,127,0)	UNKNOWN	SYBR	None
251	K11	vec-7	RGB(255,127,0)			mPALM2	RGB(255,127,0)	UNKNOWN	SYBR	None
252	K12	vec-7	RGB(255,127,0)			mPALM2	RGB(255,127,0)	UNKNOWN	SYBR	None
253	K13	HBx-2	RGB(139,137,112)			mPALM2	RGB(255,127,0)	UNKNOWN	SYBR	None
254	K14	HBx-2	RGB(139,137,112)			mPALM2	RGB(255,127,0)	UNKNOWN	SYBR	None
255	K15	HBx-2	RGB(139,137,112)			mPALM2	RGB(255,127,0)	UNKNOWN	SYBR	None
256	K16	HBx-3	RGB(238,121,66)			mPALM2	RGB(255,127,0)	UNKNOWN	SYBR	None
257	K17	HBx-3	RGB(238,121,66)			mPALM2	RGB(255,127,0)	UNKNOWN	SYBR	None
258	K18	HBx-3	RGB(238,121,66)			mPALM2	RGB(255,127,0)	UNKNOWN	SYBR	None
259	K19	HBx-5	RGB(142,56,142)			mPALM2	RGB(255,127,0)	UNKNOWN	SYBR	None
260	K20	HBx-5	RGB(142,56,142)			mPALM2	RGB(255,127,0)	UNKNOWN	SYBR	None
261	K21	HBx-5	RGB(142,56,142)			mPALM2	RGB(255,127,0)	UNKNOWN	SYBR	None
262	K22	HBx-8	RGB(198,113,113)			mPALM2	RGB(255,127,0)	UNKNOWN	SYBR	None
263	K23	HBx-8	RGB(198,113,113)			mPALM2	RGB(255,127,0)	UNKNOWN	SYBR	None
264	K24	HBx-8	RGB(198,113,113)			mPALM2	RGB(255,127,0)	UNKNOWN	SYBR	None
265	L1	vec-1	RGB(176,23,31)			mC8A	RGB(142,142,56)	UNKNOWN	SYBR	None
266	L2	vec-1	RGB(176,23,31)			mC8A	RGB(142,142,56)	UNKNOWN	SYBR	None
267	L3	vec-1	RGB(176,23,31)			mC8A	RGB(142,142,56)	UNKNOWN	SYBR	None
268	L4	vec-4	RGB(0,0,255)			mC8A	RGB(142,142,56)	UNKNOWN	SYBR	None
269	L5	vec-4	RGB(0,0,255)			mC8A	RGB(142,142,56)	UNKNOWN	SYBR	None
270	L6	vec-4	RGB(0,0,255)			mC8A	RGB(142,142,56)	UNKNOWN	SYBR	None
271	L7	vec-6	RGB(0,139,69)			mC8A	RGB(142,142,56)	UNKNOWN	SYBR	None
272	L8	vec-6	RGB(0,139,69)			mC8A	RGB(142,142,56)	UNKNOWN	SYBR	None
273	L9	vec-6	RGB(0,139,69)			mC8A	RGB(142,142,56)	UNKNOWN	SYBR	None
274	L10	vec-7	RGB(255,127,0)			mC8A	RGB(142,142,56)	UNKNOWN	SYBR	None
275	L11	vec-7	RGB(255,127,0)			mC8A	RGB(142,142,56)	UNKNOWN	SYBR	None
276	L12	vec-7	RGB(255,127,0)			mC8A	RGB(142,142,56)	UNKNOWN	SYBR	None
277	L13	HBx-2	RGB(139,137,112)			mC8A	RGB(142,142,56)	UNKNOWN	SYBR	None
278	L14	HBx-2	RGB(139,137,112)			mC8A	RGB(142,142,56)	UNKNOWN	SYBR	None
279	L15	HBx-2	RGB(139,137,112)			mC8A	RGB(142,142,56)	UNKNOWN	SYBR	None
280	L16	HBx-3	RGB(238,121,66)			mC8A	RGB(142,142,56)	UNKNOWN	SYBR	None
281	L17	HBx-3	RGB(238,121,66)			mC8A	RGB(142,142,56)	UNKNOWN	SYBR	None
282	L18	HBx-3	RGB(238,121,66)			mC8A	RGB(142,142,56)	UNKNOWN	SYBR	None
283	L19	HBx-5	RGB(142,56,142)			mC8A	RGB(142,142,56)	UNKNOWN	SYBR	None
284	L20	HBx-5	RGB(142,56,142)			mC8A	RGB(142,142,56)	UNKNOWN	SYBR	None
285	L21	HBx-5	RGB(142,56,142)			mC8A	RGB(142,142,56)	UNKNOWN	SYBR	None
286	L22	HBx-8	RGB(198,113,113)			mC8A	RGB(142,142,56)	UNKNOWN	SYBR	None
287	L23	HBx-8	RGB(198,113,113)			mC8A	RGB(142,142,56)	UNKNOWN	SYBR	None
288	L24	HBx-8	RGB(198,113,113)			mC8A	RGB(142,142,56)	UNKNOWN	SYBR	None
289	M1	vec-1	RGB(176,23,31)			mTAT	RGB(238,44,44)	UNKNOWN	SYBR	None
290	M2	vec-1	RGB(176,23,31)			mTAT	RGB(238,44,44)	UNKNOWN	SYBR	None
291	M3	vec-1	RGB(176,23,31)			mTAT	RGB(238,44,44)	UNKNOWN	SYBR	None
292	M4	vec-4	RGB(0,0,255)			mTAT	RGB(238,44,44)	UNKNOWN	SYBR	None
293	M5	vec-4	RGB(0,0,255)			mTAT	RGB(238,44,44)	UNKNOWN	SYBR	None
294	M6	vec-4	RGB(0,0,255)			mTAT	RGB(238,44,44)	UNKNOWN	SYBR	None
295	M7	vec-6	RGB(0,139,69)			mTAT	RGB(238,44,44)	UNKNOWN	SYBR	None
296	M8	vec-6	RGB(0,139,69)			mTAT	RGB(238,44,44)	UNKNOWN	SYBR	None
297	M9	vec-6	RGB(0,139,69)			mTAT	RGB(238,44,44)	UNKNOWN	SYBR	None
298	M10	vec-7	RGB(255,127,0)			mTAT	RGB(238,44,44)	UNKNOWN	SYBR	None
299	M11	vec-7	RGB(255,127,0)			mTAT	RGB(238,44,44)	UNKNOWN	SYBR	None
300	M12	vec-7	RGB(255,127,0)			mTAT	RGB(238,44,44)	UNKNOWN	SYBR	None
301	M13	HBx-2	RGB(139,137,112)			mTAT	RGB(238,44,44)	UNKNOWN	SYBR	None
302	M14	HBx-2	RGB(139,137,112)			mTAT	RGB(238,44,44)	UNKNOWN	SYBR	None
303	M15	HBx-2	RGB(139,137,112)			mTAT	RGB(238,44,44)	UNKNOWN	SYBR	None
304	M16	HBx-3	RGB(238,121,66)			mTAT	RGB(238,44,44)	UNKNOWN	SYBR	None
305	M17	HBx-3	RGB(238,121,66)			mTAT	RGB(238,44,44)	UNKNOWN	SYBR	None
306	M18	HBx-3	RGB(238,121,66)			mTAT	RGB(238,44,44)	UNKNOWN	SYBR	None
307	M19	HBx-5	RGB(142,56,142)			mTAT	RGB(238,44,44)	UNKNOWN	SYBR	None
308	M20	HBx-5	RGB(142,56,142)			mTAT	RGB(238,44,44)	UNKNOWN	SYBR	None
309	M21	HBx-5	RGB(142,56,142)			mTAT	RGB(238,44,44)	UNKNOWN	SYBR	None
310	M22	HBx-8	RGB(198,113,113)			mTAT	RGB(238,44,44)	UNKNOWN	SYBR	None
311	M23	HBx-8	RGB(198,113,113)			mTAT	RGB(238,44,44)	UNKNOWN	SYBR	None
312	M24	HBx-8	RGB(198,113,113)			mTAT	RGB(238,44,44)	UNKNOWN	SYBR	None
313	N1	vec-1	RGB(176,23,31)			mANGPTL6	RGB(51,161,201)	UNKNOWN	SYBR	None
314	N2	vec-1	RGB(176,23,31)			mANGPTL6	RGB(51,161,201)	UNKNOWN	SYBR	None
315	N3	vec-1	RGB(176,23,31)			mANGPTL6	RGB(51,161,201)	UNKNOWN	SYBR	None
316	N4	vec-4	RGB(0,0,255)			mANGPTL6	RGB(51,161,201)	UNKNOWN	SYBR	None
317	N5	vec-4	RGB(0,0,255)			mANGPTL6	RGB(51,161,201)	UNKNOWN	SYBR	None
318	N6	vec-4	RGB(0,0,255)			mANGPTL6	RGB(51,161,201)	UNKNOWN	SYBR	None
319	N7	vec-6	RGB(0,139,69)			mANGPTL6	RGB(51,161,201)	UNKNOWN	SYBR	None
320	N8	vec-6	RGB(0,139,69)			mANGPTL6	RGB(51,161,201)	UNKNOWN	SYBR	None
321	N9	vec-6	RGB(0,139,69)			mANGPTL6	RGB(51,161,201)	UNKNOWN	SYBR	None
322	N10	vec-7	RGB(255,127,0)			mANGPTL6	RGB(51,161,201)	UNKNOWN	SYBR	None
323	N11	vec-7	RGB(255,127,0)			mANGPTL6	RGB(51,161,201)	UNKNOWN	SYBR	None
324	N12	vec-7	RGB(255,127,0)			mANGPTL6	RGB(51,161,201)	UNKNOWN	SYBR	None
325	N13	HBx-2	RGB(139,137,112)			mANGPTL6	RGB(51,161,201)	UNKNOWN	SYBR	None
326	N14	HBx-2	RGB(139,137,112)			mANGPTL6	RGB(51,161,201)	UNKNOWN	SYBR	None
327	N15	HBx-2	RGB(139,137,112)			mANGPTL6	RGB(51,161,201)	UNKNOWN	SYBR	None
328	N16	HBx-3	RGB(238,121,66)			mANGPTL6	RGB(51,161,201)	UNKNOWN	SYBR	None
329	N17	HBx-3	RGB(238,121,66)			mANGPTL6	RGB(51,161,201)	UNKNOWN	SYBR	None
330	N18	HBx-3	RGB(238,121,66)			mANGPTL6	RGB(51,161,201)	UNKNOWN	SYBR	None
331	N19	HBx-5	RGB(142,56,142)			mANGPTL6	RGB(51,161,201)	UNKNOWN	SYBR	None
332	N20	HBx-5	RGB(142,56,142)			mANGPTL6	RGB(51,161,201)	UNKNOWN	SYBR	None
333	N21	HBx-5	RGB(142,56,142)			mANGPTL6	RGB(51,161,201)	UNKNOWN	SYBR	None
334	N22	HBx-8	RGB(198,113,113)			mANGPTL6	RGB(51,161,201)	UNKNOWN	SYBR	None
335	N23	HBx-8	RGB(198,113,113)			mANGPTL6	RGB(51,161,201)	UNKNOWN	SYBR	None
336	N24	HBx-8	RGB(198,113,113)			mANGPTL6	RGB(51,161,201)	UNKNOWN	SYBR	None
337	O1	vec-1	RGB(176,23,31)			mMAGEA6	RGB(238,18,137)	UNKNOWN	SYBR	None
338	O2	vec-1	RGB(176,23,31)			mMAGEA6	RGB(238,18,137)	UNKNOWN	SYBR	None
339	O3	vec-1	RGB(176,23,31)			mMAGEA6	RGB(238,18,137)	UNKNOWN	SYBR	None
340	O4	vec-4	RGB(0,0,255)			mMAGEA6	RGB(238,18,137)	UNKNOWN	SYBR	None
341	O5	vec-4	RGB(0,0,255)			mMAGEA6	RGB(238,18,137)	UNKNOWN	SYBR	None
342	O6	vec-4	RGB(0,0,255)			mMAGEA6	RGB(238,18,137)	UNKNOWN	SYBR	None
343	O7	vec-6	RGB(0,139,69)			mMAGEA6	RGB(238,18,137)	UNKNOWN	SYBR	None
344	O8	vec-6	RGB(0,139,69)			mMAGEA6	RGB(238,18,137)	UNKNOWN	SYBR	None
345	O9	vec-6	RGB(0,139,69)			mMAGEA6	RGB(238,18,137)	UNKNOWN	SYBR	None
346	O10	vec-7	RGB(255,127,0)			mMAGEA6	RGB(238,18,137)	UNKNOWN	SYBR	None
347	O11	vec-7	RGB(255,127,0)			mMAGEA6	RGB(238,18,137)	UNKNOWN	SYBR	None
348	O12	vec-7	RGB(255,127,0)			mMAGEA6	RGB(238,18,137)	UNKNOWN	SYBR	None
349	O13	HBx-2	RGB(139,137,112)			mMAGEA6	RGB(238,18,137)	UNKNOWN	SYBR	None
350	O14	HBx-2	RGB(139,137,112)			mMAGEA6	RGB(238,18,137)	UNKNOWN	SYBR	None
351	O15	HBx-2	RGB(139,137,112)			mMAGEA6	RGB(238,18,137)	UNKNOWN	SYBR	None
352	O16	HBx-3	RGB(238,121,66)			mMAGEA6	RGB(238,18,137)	UNKNOWN	SYBR	None
353	O17	HBx-3	RGB(238,121,66)			mMAGEA6	RGB(238,18,137)	UNKNOWN	SYBR	None
354	O18	HBx-3	RGB(238,121,66)			mMAGEA6	RGB(238,18,137)	UNKNOWN	SYBR	None
355	O19	HBx-5	RGB(142,56,142)			mMAGEA6	RGB(238,18,137)	UNKNOWN	SYBR	None
356	O20	HBx-5	RGB(142,56,142)			mMAGEA6	RGB(238,18,137)	UNKNOWN	SYBR	None
357	O21	HBx-5	RGB(142,56,142)			mMAGEA6	RGB(238,18,137)	UNKNOWN	SYBR	None
358	O22	HBx-8	RGB(198,113,113)			mMAGEA6	RGB(238,18,137)	UNKNOWN	SYBR	None
359	O23	HBx-8	RGB(198,113,113)			mMAGEA6	RGB(238,18,137)	UNKNOWN	SYBR	None
360	O24	HBx-8	RGB(198,113,113)			mMAGEA6	RGB(238,18,137)	UNKNOWN	SYBR	None
361	P1	vec-1	RGB(176,23,31)			mCTSD	RGB(176,23,31)	UNKNOWN	SYBR	None
362	P2	vec-1	RGB(176,23,31)			mCTSD	RGB(176,23,31)	UNKNOWN	SYBR	None
363	P3	vec-1	RGB(176,23,31)			mCTSD	RGB(176,23,31)	UNKNOWN	SYBR	None
364	P4	vec-4	RGB(0,0,255)			mCTSD	RGB(176,23,31)	UNKNOWN	SYBR	None
365	P5	vec-4	RGB(0,0,255)			mCTSD	RGB(176,23,31)	UNKNOWN	SYBR	None
366	P6	vec-4	RGB(0,0,255)			mCTSD	RGB(176,23,31)	UNKNOWN	SYBR	None
367	P7	vec-6	RGB(0,139,69)			mCTSD	RGB(176,23,31)	UNKNOWN	SYBR	None
368	P8	vec-6	RGB(0,139,69)			mCTSD	RGB(176,23,31)	UNKNOWN	SYBR	None
369	P9	vec-6	RGB(0,139,69)			mCTSD	RGB(176,23,31)	UNKNOWN	SYBR	None
370	P10	vec-7	RGB(255,127,0)			mCTSD	RGB(176,23,31)	UNKNOWN	SYBR	None
371	P11	vec-7	RGB(255,127,0)			mCTSD	RGB(176,23,31)	UNKNOWN	SYBR	None
372	P12	vec-7	RGB(255,127,0)			mCTSD	RGB(176,23,31)	UNKNOWN	SYBR	None
373	P13	HBx-2	RGB(139,137,112)			mCTSD	RGB(176,23,31)	UNKNOWN	SYBR	None
374	P14	HBx-2	RGB(139,137,112)			mCTSD	RGB(176,23,31)	UNKNOWN	SYBR	None
375	P15	HBx-2	RGB(139,137,112)			mCTSD	RGB(176,23,31)	UNKNOWN	SYBR	None
376	P16	HBx-3	RGB(238,121,66)			mCTSD	RGB(176,23,31)	UNKNOWN	SYBR	None
377	P17	HBx-3	RGB(238,121,66)			mCTSD	RGB(176,23,31)	UNKNOWN	SYBR	None
378	P18	HBx-3	RGB(238,121,66)			mCTSD	RGB(176,23,31)	UNKNOWN	SYBR	None
379	P19	HBx-5	RGB(142,56,142)			mCTSD	RGB(176,23,31)	UNKNOWN	SYBR	None
380	P20	HBx-5	RGB(142,56,142)			mCTSD	RGB(176,23,31)	UNKNOWN	SYBR	None
381	P21	HBx-5	RGB(142,56,142)			mCTSD	RGB(176,23,31)	UNKNOWN	SYBR	None
382	P22	HBx-8	RGB(198,113,113)			mCTSD	RGB(176,23,31)	UNKNOWN	SYBR	None
383	P23	HBx-8	RGB(198,113,113)			mCTSD	RGB(176,23,31)	UNKNOWN	SYBR	None
384	P24	HBx-8	RGB(198,113,113)			mCTSD	RGB(176,23,31)	UNKNOWN	SYBR	None

## Sheet: Amplification Data
Block Type	384-Well Block
Calibration Background is expired	Yes
Calibration Background performed on	10-12-2018 11:47:46 PDT
Calibration FAM is expired	Yes
Calibration FAM performed on	10-23-2018 10:23:19 PDT
Calibration MELTDOCTOR is expired	Yes
Calibration MELTDOCTOR performed on	09-26-2017 21:22:46 PDT
Calibration NED is expired	Yes
Calibration NED performed on	10-23-2018 10:33:14 PDT
Calibration ROI is expired	Yes
Calibration ROI performed on	10-12-2018 09:37:21 PDT
Calibration ROX is expired	Yes
Calibration ROX performed on	10-23-2018 10:07:21 PDT
Calibration SYBR is expired	Yes
Calibration SYBR performed on	10-23-2018 09:57:53 PDT
Calibration TAMRA is expired	Yes
Calibration TAMRA performed on	10-23-2018 10:45:25 PDT
Calibration Uniformity is expired	Yes
Calibration Uniformity performed on	10-12-2018 10:06:59 PDT
Calibration VIC is expired	Yes
Calibration VIC performed on	10-23-2018 10:54:25 PDT
Chemistry	SYBR_GREEN
Date Created	02-07-2021 22:20:48 PST
Experiment File Name	D:\NZZ\2021-02-07 205722.eds
Experiment Name	2021-02-07 205722
Experiment Run End Time	02-07-2021 15:32:51 PST
Experiment Type	Comparative Cт (ΔΔCт)
Instrument Name	285880860
Instrument Serial Number	285880860
Instrument Type	QuantStudio 12K Flex
Passive Reference	ROX
Quantification Cycle Method	Ct
Signal Smoothing On	true
Stage/ Cycle where Analysis is performed	Stage 2, Step 2
Well	Cycle	Target Name	Rn	Delta Rn
1	1	mCYC	0.23356	-0.00145021
1	2	mCYC	0.236691	-0.00132816
1	3	mCYC	0.24168	0.000652456
1	4	mCYC	0.245615	0.0015797
1	5	mCYC	0.248072	0.00102843
1	6	mCYC	0.249982	-6.97483e-05
1	7	mCYC	0.25142	-0.00164049
1	8	mCYC	0.254253	-0.00181576
1	9	mCYC	0.25756	-0.00151764
1	10	mCYC	0.260944	-0.00114147
1	11	mCYC	0.265134	4.04031e-05
1	12	mCYC	0.267957	-0.000145202
1	13	mCYC	0.27414	0.00302931
1	14	mCYC	0.281921	0.00780201
1	15	mCYC	0.29338	0.0162523
1	16	mCYC	0.314918	0.0347824
1	17	mCYC	0.351126	0.0679815
1	18	mCYC	0.415804	0.129651
1	19	mCYC	0.527761	0.2386
1	20	mCYC	0.706218	0.414049
1	21	mCYC	0.960695	0.665517
1	22	mCYC	1.26443	0.966241
1	23	mCYC	1.56006	1.25886
1	24	mCYC	1.78815	1.48394
1	25	mCYC	1.94113	1.63391
1	26	mCYC	2.02571	1.71549
1	27	mCYC	2.07548	1.76225
1	28	mCYC	2.10511	1.78887
1	29	mCYC	2.11894	1.79969
1	30	mCYC	2.12439	1.80214
1	31	mCYC	2.12825	1.80299
1	32	mCYC	2.12748	1.79921
1	33	mCYC	2.12877	1.7975
1	34	mCYC	2.12485	1.79057
1	35	mCYC	2.12314	1.78585
1	36	mCYC	2.1161	1.7758
1	37	mCYC	2.10785	1.76454
1	38	mCYC	2.10528	1.75896
1	39	mCYC	2.10121	1.75188
1	40	mCYC	2.09765	1.74531
2	1	mCYC	0.193771	0.00181383
2	2	mCYC	0.195227	0.000329593
2	3	mCYC	0.198849	0.0010125
2	4	mCYC	0.202116	0.0013398
2	5	mCYC	0.204894	0.0011784
2	6	mCYC	0.206467	-0.000187547
2	7	mCYC	0.207937	-0.00165767
2	8	mCYC	0.210683	-0.00185054
2	9	mCYC	0.213628	-0.00184589
2	10	mCYC	0.21738	-0.00103268
2	11	mCYC	0.220947	-0.000405103
2	12	mCYC	0.224485	0.000192997
2	13	mCYC	0.230487	0.00325573
2	14	mCYC	0.239075	0.00890361
2	15	mCYC	0.250801	0.0176907
2	16	mCYC	0.271693	0.035643
2	17	mCYC	0.308697	0.0697075
2	18	mCYC	0.374006	0.132077
2	19	mCYC	0.486776	0.241908
2	20	mCYC	0.667014	0.419206
2	21	mCYC	0.922641	0.671894
2	22	mCYC	1.22906	0.975378
2	23	mCYC	1.52445	1.26782
2	24	mCYC	1.75886	1.49929
2	25	mCYC	1.91383	1.65132
2	26	mCYC	2.00377	1.73832
2	27	mCYC	2.05236	1.78398
2	28	mCYC	2.07741	1.80609
2	29	mCYC	2.09033	1.81607
2	30	mCYC	2.09492	1.81772
2	31	mCYC	2.09873	1.81858
2	32	mCYC	2.09912	1.81604
2	33	mCYC	2.09889	1.81287
2	34	mCYC	2.0985	1.80954
2	35	mCYC	2.09473	1.80283
2	36	mCYC	2.08446	1.78962
2	37	mCYC	2.07615	1.77837
2	38	mCYC	2.07385	1.77313
2	39	mCYC	2.07128	1.76762
2	40	mCYC	2.06278	1.75618
3	1	mCYC	0.181552	0.00158663
3	2	mCYC	0.183278	0.000473035
3	3	mCYC	0.186752	0.00110815
3	4	mCYC	0.189404	0.000921265
3	5	mCYC	0.191653	0.00033191
3	6	mCYC	0.193865	-0.000294817
3	7	mCYC	0.196228	-0.000770743
3	8	mCYC	0.198654	-0.0011837
3	9	mCYC	0.201495	-0.00118198
3	10	mCYC	0.204352	-0.00116316
3	11	mCYC	0.207625	-0.000729015
3	12	mCYC	0.211447	0.000253911
3	13	mCYC	0.21674	0.00270818
3	14	mCYC	0.224462	0.00759078
3	15	mCYC	0.236862	0.017152
3	16	mCYC	0.25804	0.0354915
3	17	mCYC	0.295271	0.0698833
3	18	mCYC	0.359658	0.131432
3	19	mCYC	0.473135	0.24207
3	20	mCYC	0.654582	0.420678
3	21	mCYC	0.9113	0.674557
3	22	mCYC	1.21528	0.975694
3	23	mCYC	1.50849	1.26607
3	24	mCYC	1.74225	1.49699
3	25	mCYC	1.89749	1.64939
3	26	mCYC	1.99193	1.741
3	27	mCYC	2.04269	1.78891
3	28	mCYC	2.06396	1.80735
3	29	mCYC	2.07541	1.81595
3	30	mCYC	2.08226	1.81997
3	31	mCYC	2.08764	1.82251
3	32	mCYC	2.08802	1.82005
3	33	mCYC	2.08526	1.81446
3	34	mCYC	2.08278	1.80914
3	35	mCYC	2.08029	1.8038
3	36	mCYC	2.07496	1.79564
3	37	mCYC	2.07022	1.78805
3	38	mCYC	2.06742	1.78242
3	39	mCYC	2.0655	1.77766
3	40	mCYC	2.0574	1.76672
4	1	mCYC	0.179784	0.00188541
4	2	mCYC	0.181214	0.000324705
4	3	mCYC	0.184871	0.000991675
4	4	mCYC	0.18749	0.000620392
4	5	mCYC	0.189847	-1.36137e-05
4	6	mCYC	0.192703	-0.000148311
4	7	mCYC	0.195257	-0.000584534
4	8	mCYC	0.19751	-0.00132219
4	9	mCYC	0.200665	-0.00115758
4	10	mCYC	0.20415	-0.000663096
4	11	mCYC	0.207911	0.000107333
4	12	mCYC	0.212964	0.00216993
4	13	mCYC	0.220552	0.00676757
4	14	mCYC	0.231856	0.0150814
4	15	mCYC	0.249534	0.0297681
4	16	mCYC	0.280369	0.0576128
4	17	mCYC	0.337571	0.111825
4	18	mCYC	0.435423	0.206686
4	19	mCYC	0.596972	0.365244
4	20	mCYC	0.834925	0.600207
4	21	mCYC	1.13147	0.89376
4	22	mCYC	1.43294	1.19224
4	23	mCYC	1.6814	1.43771
4	24	mCYC	1.85748	1.6108
4	25	mCYC	1.9683	1.71863
4	26	mCYC	2.03521	1.78254
4	27	mCYC	2.07699	1.82134
4	28	mCYC	2.10465	1.84601
4	29	mCYC	2.11991	1.85828
4	30	mCYC	2.12529	1.86067
4	31	mCYC	2.12582	1.85821
4	32	mCYC	2.12717	1.85656
4	33	mCYC	2.12181	1.84821
4	34	mCYC	2.1168	1.84021
4	35	mCYC	2.11308	1.8335
4	36	mCYC	2.10727	1.8247
4	37	mCYC	2.09923	1.81367
4	38	mCYC	2.09224	1.80369
4	39	mCYC	2.08679	1.79525
4	40	mCYC	2.08161	1.78708
5	1	mCYC	0.234327	0.00186234
5	2	mCYC	0.236294	0.000396067
5	3	mCYC	0.240073	0.000741745
5	4	mCYC	0.24366	0.000895868
5	5	mCYC	0.246867	0.000669431
5	6	mCYC	0.249487	-0.000143382
5	7	mCYC	0.252019	-0.0010449
5	8	mCYC	0.254923	-0.00157465
5	9	mCYC	0.258485	-0.00144491
5	10	mCYC	0.262346	-0.00101729
5	11	mCYC	0.267021	0.000224025
5	12	mCYC	0.272924	0.00269406
5	13	mCYC	0.280465	0.0068017
5	14	mCYC	0.292564	0.0154675
5	15	mCYC	0.312326	0.0317967
5	16	mCYC	0.347545	0.0635819
5	17	mCYC	0.40968	0.122285
5	18	mCYC	0.516503	0.225674
5	19	mCYC	0.690603	0.396341
5	20	mCYC	0.944439	0.646744
5	21	mCYC	1.2559	0.954774
5	22	mCYC	1.55982	1.25526
5	23	mCYC	1.80687	1.49887
5	24	mCYC	1.97732	1.66589
5	25	mCYC	2.08096	1.7661
5	26	mCYC	2.14155	1.82326
5	27	mCYC	2.17767	1.85594
5	28	mCYC	2.20193	1.87677
5	29	mCYC	2.21559	1.88699
5	30	mCYC	2.21941	1.88739
5	31	mCYC	2.21682	1.88136
5	32	mCYC	2.2125	1.87361
5	33	mCYC	2.21111	1.86878
5	34	mCYC	2.20499	1.85923
5	35	mCYC	2.19921	1.85002
5	36	mCYC	2.19319	1.84056
5	37	mCYC	2.18383	1.82777
5	38	mCYC	2.17436	1.81487
5	39	mCYC	2.17019	1.80726
5	40	mCYC	2.16597	1.79961
6	1	mCYC	0.112376	0.00527554
6	2	mCYC	0.112726	0.00267425
6	3	mCYC	0.114573	0.00156932
6	4	mCYC	0.11652	0.000565126
6	5	mCYC	0.118861	-4.4597e-05
6	6	mCYC	0.121199	-0.000657681
6	7	mCYC	0.124039	-0.000768789
6	8	mCYC	0.126468	-0.00129162
6	9	mCYC	0.129479	-0.00123161
6	10	mCYC	0.132681	-0.000980281
6	11	mCYC	0.136892	0.000279153
6	12	mCYC	0.142125	0.00256097
6	13	mCYC	0.149841	0.00732574
6	14	mCYC	0.163003	0.0175368
6	15	mCYC	0.183319	0.0349017
6	16	mCYC	0.218628	0.0672587
6	17	mCYC	0.28114	0.12682
6	18	mCYC	0.389099	0.231828
6	19	mCYC	0.564997	0.404774
6	20	mCYC	0.820342	0.657169
6	21	mCYC	1.13392	0.967799
6	22	mCYC	1.44469	1.27561
6	23	mCYC	1.69528	1.52326
6	24	mCYC	1.86343	1.68845
6	25	mCYC	1.9696	1.79167
6	26	mCYC	2.03328	1.8524
6	27	mCYC	2.06783	1.88399
6	28	mCYC	2.09045	1.90366
6	29	mCYC	2.10032	1.91058
6	30	mCYC	2.10653	1.91385
6	31	mCYC	2.10628	1.91065
6	32	mCYC	2.10389	1.9053
6	33	mCYC	2.10105	1.89951
6	34	mCYC	2.09369	1.8892
6	35	mCYC	2.08592	1.87848
6	36	mCYC	2.07944	1.86904
6	37	mCYC	2.07104	1.85769
6	38	mCYC	2.06718	1.85088
6	39	mCYC	2.06538	1.84614
6	40	mCYC	2.06243	1.84024
7	1	mCYC	0.15723	0.00323232
7	2	mCYC	0.158586	0.0016536
7	3	mCYC	0.161357	0.00149014
7	4	mCYC	0.163403	0.000601751
7	5	mCYC	0.16545	-0.000285507
7	6	mCYC	0.168454	-0.000216214
7	7	mCYC	0.170907	-0.000697311
7	8	mCYC	0.173083	-0.00145596
7	9	mCYC	0.176075	-0.00139768
7	10	mCYC	0.17952	-0.000887533
7	11	mCYC	0.183691	0.000349042
7	12	mCYC	0.188776	0.00249927
7	13	mCYC	0.196595	0.00738464
7	14	mCYC	0.209468	0.0173226
7	15	mCYC	0.230135	0.035055
7	16	mCYC	0.266894	0.0688796
7	17	mCYC	0.331566	0.130617
7	18	mCYC	0.443489	0.239606
7	19	mCYC	0.623944	0.417126
7	20	mCYC	0.881394	0.671642
7	21	mCYC	1.18915	0.976459
7	22	mCYC	1.48638	1.27076
7	23	mCYC	1.71733	1.49877
7	24	mCYC	1.87729	1.6558
7	25	mCYC	1.97322	1.7488
7	26	mCYC	2.02563	1.79828
7	27	mCYC	2.05618	1.82588
7	28	mCYC	2.07668	1.84345
7	29	mCYC	2.08321	1.84705
7	30	mCYC	2.08286	1.84376
7	31	mCYC	2.08166	1.83963
7	32	mCYC	2.07692	1.83195
7	33	mCYC	2.07563	1.82773
7	34	mCYC	2.07203	1.82119
7	35	mCYC	2.06569	1.81192
7	36	mCYC	2.06166	1.80496
7	37	mCYC	2.05879	1.79916
7	38	mCYC	2.05147	1.7889
7	39	mCYC	2.04651	1.78101
7	40	mCYC	2.0442	1.77576
8	1	mCYC	0.106485	0.00276436
8	2	mCYC	0.107701	0.00121462
8	3	mCYC	0.110259	0.00100712
8	4	mCYC	0.112668	0.00065008
8	5	mCYC	0.114857	7.35366e-05
8	6	mCYC	0.117114	-0.000434618
8	7	mCYC	0.11949	-0.000824361
8	8	mCYC	0.122169	-0.000911141
8	9	mCYC	0.12479	-0.00105571
8	10	mCYC	0.127907	-0.000704252
8	11	mCYC	0.131547	0.000170272
8	12	mCYC	0.136172	0.00202908
8	13	mCYC	0.143058	0.00614928
8	14	mCYC	0.153917	0.0142434
8	15	mCYC	0.171033	0.028593
8	16	mCYC	0.200627	0.0554214
8	17	mCYC	0.253969	0.105998
8	18	mCYC	0.348536	0.197799
8	19	mCYC	0.504398	0.350896
8	20	mCYC	0.736469	0.580201
8	21	mCYC	1.03451	0.875477
8	22	mCYC	1.34208	1.18028
8	23	mCYC	1.6014	1.43683
8	24	mCYC	1.78354	1.61621
8	25	mCYC	1.89709	1.727
8	26	mCYC	1.96718	1.79432
8	27	mCYC	2.00716	1.83153
8	28	mCYC	2.027	1.84861
8	29	mCYC	2.03625	1.85509
8	30	mCYC	2.04237	1.85845
8	31	mCYC	2.04452	1.85783
8	32	mCYC	2.04305	1.85359
8	33	mCYC	2.0387	1.84648
8	34	mCYC	2.03381	1.83883
8	35	mCYC	2.02917	1.83142
8	36	mCYC	2.02059	1.82007
8	37	mCYC	2.01415	1.81086
8	38	mCYC	2.00863	1.80258
8	39	mCYC	2.00369	1.79488
8	40	mCYC	2.00118	1.7896
9	1	mCYC	0.0929457	0.00359185
9	2	mCYC	0.0946254	0.00209112
9	3	mCYC	0.0971425	0.0014278
9	4	mCYC	0.0996637	0.000768609
9	5	mCYC	0.102072	-3.0518e-06
9	6	mCYC	0.104742	-0.00051421
9	7	mCYC	0.107277	-0.00115893
9	8	mCYC	0.110159	-0.00145794
9	9	mCYC	0.113756	-0.00104114
9	10	mCYC	0.117316	-0.000661912
9	11	mCYC	0.121339	0.000181243
9	12	mCYC	0.126798	0.00245954
9	13	mCYC	0.134503	0.00698448
9	14	mCYC	0.146925	0.0162263
9	15	mCYC	0.166586	0.0327063
9	16	mCYC	0.202112	0.0650525
9	17	mCYC	0.264598	0.124358
9	18	mCYC	0.373531	0.23011
9	19	mCYC	0.55155	0.404949
9	20	mCYC	0.809688	0.659906
9	21	mCYC	1.12397	0.971007
9	22	mCYC	1.43348	1.27733
9	23	mCYC	1.6794	1.52008
9	24	mCYC	1.84765	1.68515
9	25	mCYC	1.95164	1.78596
9	26	mCYC	2.01422	1.84535
9	27	mCYC	2.06269	1.89065
9	28	mCYC	2.06738	1.89216
9	29	mCYC	2.06922	1.89081
9	30	mCYC	2.07694	1.89536
9	31	mCYC	2.07684	1.89207
9	32	mCYC	2.07473	1.88678
9	33	mCYC	2.07585	1.88473
9	34	mCYC	2.07061	1.8763
9	35	mCYC	2.06411	1.86663
9	36	mCYC	2.05722	1.85655
9	37	mCYC	2.05185	1.848
9	38	mCYC	2.04778	1.84075
9	39	mCYC	2.04302	1.83281
9	40	mCYC	2.0398	1.82642
10	1	mCYC	-0.0382923	0.00293931
10	2	mCYC	-0.0368098	0.00138279
10	3	mCYC	-0.0339255	0.00122794
10	4	mCYC	-0.0317704	0.000343994
10	5	mCYC	-0.0291162	-4.09706e-05
10	6	mCYC	-0.026071	-3.48671e-05
10	7	mCYC	-0.0235829	-0.000585886
10	8	mCYC	-0.0215131	-0.00155511
10	9	mCYC	-0.0180487	-0.00112981
10	10	mCYC	-0.0143331	-0.000453323
10	11	mCYC	-0.0107022	0.000138491
10	12	mCYC	-0.00571203	0.00208954
10	13	mCYC	0.00218869	0.00695116
10	14	mCYC	0.0138685	0.0155919
10	15	mCYC	0.0332873	0.0319715
10	16	mCYC	0.0671834	0.0628286
10	17	mCYC	0.127327	0.119933
10	18	mCYC	0.232201	0.221768
10	19	mCYC	0.403582	0.39011
10	20	mCYC	0.65674	0.640228
10	21	mCYC	0.973004	0.953454
10	22	mCYC	1.29104	1.26845
10	23	mCYC	1.54959	1.52396
10	24	mCYC	1.72801	1.69934
10	25	mCYC	1.83829	1.80658
10	26	mCYC	1.90713	1.87239
10	27	mCYC	1.94516	1.90738
10	28	mCYC	1.96511	1.92428
10	29	mCYC	1.97567	1.9318
10	30	mCYC	1.97965	1.93275
10	31	mCYC	1.97958	1.92964
10	32	mCYC	1.97836	1.92538
10	33	mCYC	1.97428	1.91826
10	34	mCYC	1.96838	1.90932
10	35	mCYC	1.96116	1.89906
10	36	mCYC	1.95167	1.88654
10	37	mCYC	1.94385	1.87567
10	38	mCYC	1.94104	1.86983
10	39	mCYC	1.93858	1.86433
10	40	mCYC	1.93319	1.8559
11	1	mCYC	0.141317	0.00359876
11	2	mCYC	0.143107	0.00181844
11	3	mCYC	0.146595	0.00173581
11	4	mCYC	0.1496	0.0011698
11	5	mCYC	0.152228	0.000226663
11	6	mCYC	0.154943	-0.000629129
11	7	mCYC	0.15798	-0.00116222
11	8	mCYC	0.160964	-0.00174979
11	9	mCYC	0.163201	-0.00308282
11	10	mCYC	0.167901	-0.00195357
11	11	mCYC	0.176599	0.00317325
11	12	mCYC	0.179269	0.00227201
11	13	mCYC	0.185935	0.00536729
11	14	mCYC	0.197925	0.0137872
11	15	mCYC	0.218631	0.0309217
11	16	mCYC	0.253558	0.0622781
11	17	mCYC	0.318076	0.123226
11	18	mCYC	0.429136	0.230715
11	19	mCYC	0.607583	0.405591
11	20	mCYC	0.866504	0.660941
11	21	mCYC	1.18052	0.971383
11	22	mCYC	1.49002	1.27732
11	23	mCYC	1.73639	1.52011
11	24	mCYC	1.90696	1.68712
11	25	mCYC	2.00435	1.78094
11	26	mCYC	2.06635	1.83936
11	27	mCYC	2.10208	1.87152
11	28	mCYC	2.1175	1.88337
11	29	mCYC	2.12943	1.89173
11	30	mCYC	2.13582	1.89455
11	31	mCYC	2.13699	1.89215
11	32	mCYC	2.13134	1.88293
11	33	mCYC	2.12535	1.87337
11	34	mCYC	2.12068	1.86512
11	35	mCYC	2.11869	1.85956
11	36	mCYC	2.11017	1.84748
11	37	mCYC	2.10159	1.83532
11	38	mCYC	2.0961	1.82626
11	39	mCYC	2.08665	1.81325
11	40	mCYC	2.08415	1.80718
12	1	mCYC	0.103135	0.00444826
12	2	mCYC	0.104388	0.00280632
12	3	mCYC	0.106037	0.00156063
12	4	mCYC	0.108104	0.000732869
12	5	mCYC	0.110392	0.000125634
12	6	mCYC	0.112626	-0.000535074
12	7	mCYC	0.114988	-0.00106746
12	8	mCYC	0.117461	-0.00148877
12	9	mCYC	0.120527	-0.00131838
12	10	mCYC	0.123416	-0.00132413
12	11	mCYC	0.127953	0.000318127
12	12	mCYC	0.133526	0.00299655
12	13	mCYC	0.141046	0.0076225
12	14	mCYC	0.153098	0.0167791
12	15	mCYC	0.174981	0.0357681
12	16	mCYC	0.21527	0.0731623
12	17	mCYC	0.275578	0.130576
12	18	mCYC	0.383151	0.235254
12	19	mCYC	0.561304	0.410512
12	20	mCYC	0.820108	0.666421
12	21	mCYC	1.13473	0.978149
12	22	mCYC	1.44186	1.28238
12	23	mCYC	1.68565	1.52328
12	24	mCYC	1.85637	1.6911
12	25	mCYC	1.95907	1.79091
12	26	mCYC	2.02228	1.85123
12	27	mCYC	2.0597	1.88575
12	28	mCYC	2.07589	1.89904
12	29	mCYC	2.089	1.90926
12	30	mCYC	2.09002	1.90739
12	31	mCYC	2.09048	1.90495
12	32	mCYC	2.08567	1.89725
12	33	mCYC	2.08295	1.89163
12	34	mCYC	2.08044	1.88623
12	35	mCYC	2.07811	1.881
12	36	mCYC	2.06913	1.86913
12	37	mCYC	2.06295	1.86005
12	38	mCYC	2.05841	1.85262
12	39	mCYC	2.05262	1.84393
12	40	mCYC	2.04493	1.83335
13	1	mCYC	0.141589	0.00305597
13	2	mCYC	0.142933	0.00135861
13	3	mCYC	0.145894	0.00127813
13	4	mCYC	0.148066	0.000409173
13	5	mCYC	0.150864	0.000165841
13	6	mCYC	0.153383	-0.00035662
13	7	mCYC	0.155593	-0.00118762
13	8	mCYC	0.15854	-0.00128239
13	9	mCYC	0.162234	-0.000628853
13	10	mCYC	0.165368	-0.000536314
13	11	mCYC	0.169175	0.000229148
13	12	mCYC	0.173897	0.00190951
13	13	mCYC	0.180447	0.00541892
13	14	mCYC	0.192074	0.0140044
13	15	mCYC	0.213428	0.0323173
13	16	mCYC	0.232162	0.0480095
13	17	mCYC	0.274816	0.0876225
13	18	mCYC	0.354225	0.16399
13	19	mCYC	0.489056	0.29578
13	20	mCYC	0.700581	0.504264
13	21	mCYC	0.987567	0.788208
13	22	mCYC	1.30986	1.10746
13	23	mCYC	1.60186	1.39642
13	24	mCYC	1.82063	1.61215
13	25	mCYC	1.95586	1.74434
13	26	mCYC	2.03869	1.82413
13	27	mCYC	2.08334	1.86573
13	28	mCYC	2.10824	1.8876
13	29	mCYC	2.11725	1.89356
13	30	mCYC	2.11817	1.89144
13	31	mCYC	2.12107	1.8913
13	32	mCYC	2.12122	1.88841
13	33	mCYC	2.11924	1.88339
13	34	mCYC	2.10992	1.87102
13	35	mCYC	2.10892	1.86698
13	36	mCYC	2.10217	1.85719
13	37	mCYC	2.0945	1.84648
13	38	mCYC	2.08742	1.83636
13	39	mCYC	2.08314	1.82904
13	40	mCYC	2.08124	1.8241
14	1	mCYC	0.135617	0.00319903
14	2	mCYC	0.137186	0.00148174
14	3	mCYC	0.140117	0.0011265
14	4	mCYC	0.143054	0.000776782
14	5	mCYC	0.146437	0.000873499
14	6	mCYC	0.149263	0.000413182
14	7	mCYC	0.151297	-0.000838522
14	8	mCYC	0.153541	-0.00188139
14	9	mCYC	0.156947	-0.00176093
14	10	mCYC	0.160298	-0.00169691
14	11	mCYC	0.164273	-0.0010076
14	12	mCYC	0.169019	0.000451368
14	13	mCYC	0.175398	0.00354401
14	14	mCYC	0.184505	0.00936456
14	15	mCYC	0.19869	0.0202635
14	16	mCYC	0.223181	0.0414679
14	17	mCYC	0.266831	0.081832
14	18	mCYC	0.343138	0.154853
14	19	mCYC	0.47332	0.281748
14	20	mCYC	0.677519	0.482662
14	21	mCYC	0.961445	0.763301
14	22	mCYC	1.28482	1.08339
14	23	mCYC	1.57828	1.37356
14	24	mCYC	1.79841	1.5904
14	25	mCYC	1.94184	1.73055
14	26	mCYC	2.02605	1.81147
14	27	mCYC	2.07264	1.85478
14	28	mCYC	2.09634	1.87519
14	29	mCYC	2.10637	1.88194
14	30	mCYC	2.11001	1.88228
14	31	mCYC	2.11195	1.88095
14	32	mCYC	2.10956	1.87527
14	33	mCYC	2.10611	1.86853
14	34	mCYC	2.09957	1.85871
14	35	mCYC	2.08984	1.84569
14	36	mCYC	2.08443	1.83699
14	37	mCYC	2.08148	1.83075
14	38	mCYC	2.076	1.82199
14	39	mCYC	2.06935	1.81206
14	40	mCYC	2.06565	1.80507
15	1	mCYC	0.150523	0.00305464
15	2	mCYC	0.15276	0.00191398
15	3	mCYC	0.155776	0.00155288
15	4	mCYC	0.158619	0.00101846
15	5	mCYC	0.161039	6.07169e-05
15	6	mCYC	0.163559	-0.000796475
15	7	mCYC	0.166985	-0.000747318
15	8	mCYC	0.170128	-0.000982595
15	9	mCYC	0.173479	-0.00100887
15	10	mCYC	0.176539	-0.00132542
15	11	mCYC	0.180037	-0.00120531
15	12	mCYC	0.184833	0.00021387
15	13	mCYC	0.191217	0.00322006
15	14	mCYC	0.200465	0.00909061
15	15	mCYC	0.215164	0.0204122
15	16	mCYC	0.240308	0.0421789
15	17	mCYC	0.284791	0.0832852
15	18	mCYC	0.36197	0.157087
15	19	mCYC	0.492865	0.284604
15	20	mCYC	0.699485	0.487847
15	21	mCYC	0.983167	0.768151
15	22	mCYC	1.30239	1.084
15	23	mCYC	1.59415	1.37238
15	24	mCYC	1.80913	1.58398
15	25	mCYC	1.95082	1.7223
15	26	mCYC	2.03245	1.80055
15	27	mCYC	2.07607	1.84079
15	28	mCYC	2.0995	1.86084
15	29	mCYC	2.11365	1.87162
15	30	mCYC	2.11735	1.87194
15	31	mCYC	2.11852	1.86974
15	32	mCYC	2.11528	1.86311
15	33	mCYC	2.11102	1.85548
15	34	mCYC	2.1052	1.84628
15	35	mCYC	2.099	1.8367
15	36	mCYC	2.09167	1.82599
15	37	mCYC	2.0859	1.81685
15	38	mCYC	2.08164	1.80921
15	39	mCYC	2.07525	1.79945
15	40	mCYC	2.07144	1.79226
16	1	mCYC	0.125639	0.003133
16	2	mCYC	0.127589	0.00174728
16	3	mCYC	0.130881	0.00170397
16	4	mCYC	0.133731	0.00121801
16	5	mCYC	0.136237	0.00038793
16	6	mCYC	0.139047	-0.000137848
16	7	mCYC	0.141539	-0.000981438
16	8	mCYC	0.143903	-0.00195354
16	9	mCYC	0.147184	-0.00200844
16	10	mCYC	0.151035	-0.00149338
16	11	mCYC	0.154497	-0.00136664
16	12	mCYC	0.159963	0.000763252
16	13	mCYC	0.166403	0.00386813
16	14	mCYC	0.17592	0.0100489
16	15	mCYC	0.191229	0.022022
16	16	mCYC	0.217355	0.0448123
16	17	mCYC	0.262843	0.0869643
16	18	mCYC	0.342334	0.16312
16	19	mCYC	0.478522	0.295972
16	20	mCYC	0.689833	0.503947
16	21	mCYC	0.978893	0.789672
16	22	mCYC	1.30759	1.11503
16	23	mCYC	1.60574	1.40985
16	24	mCYC	1.8272	1.62797
16	25	mCYC	1.96935	1.76678
16	26	mCYC	2.04394	1.83804
16	27	mCYC	2.08659	1.87735
16	28	mCYC	2.10844	1.89587
16	29	mCYC	2.12228	1.90637
16	30	mCYC	2.12722	1.90797
16	31	mCYC	2.12655	1.90397
16	32	mCYC	2.12276	1.89685
16	33	mCYC	2.11688	1.88763
16	34	mCYC	2.1077	1.87511
16	35	mCYC	2.10327	1.86735
16	36	mCYC	2.09657	1.85731
16	37	mCYC	2.08975	1.84716
16	38	mCYC	2.08402	1.83809
16	39	mCYC	2.07989	1.83063
16	40	mCYC	2.0741	1.82149
17	1	mCYC	0.14157	0.00375795
17	2	mCYC	0.142975	0.00183016
17	3	mCYC	0.146252	0.00177562
17	4	mCYC	0.14905	0.00124121
17	5	mCYC	0.151604	0.000462503
17	6	mCYC	0.154332	-0.000141514
17	7	mCYC	0.156339	-0.0014671
17	8	mCYC	0.159394	-0.00174404
17	9	mCYC	0.162409	-0.00206208
17	10	mCYC	0.16629	-0.00151307
17	11	mCYC	0.170085	-0.00105025
17	12	mCYC	0.175242	0.000774365
17	13	mCYC	0.181524	0.00372436
17	14	mCYC	0.19061	0.0094776
17	15	mCYC	0.205567	0.0211024
17	16	mCYC	0.23025	0.0424527
17	17	mCYC	0.273159	0.08203
17	18	mCYC	0.349971	0.155509
17	19	mCYC	0.481174	0.283381
17	20	mCYC	0.688419	0.487293
17	21	mCYC	0.974497	0.770038
17	22	mCYC	1.30313	1.09534
17	23	mCYC	1.60663	1.3955
17	24	mCYC	1.83251	1.61806
17	25	mCYC	1.97794	1.76015
17	26	mCYC	2.06307	1.84195
17	27	mCYC	2.10928	1.88483
17	28	mCYC	2.13134	1.90355
17	29	mCYC	2.13986	1.90875
17	30	mCYC	2.14482	1.91037
17	31	mCYC	2.14443	1.90665
17	32	mCYC	2.14274	1.90163
17	33	mCYC	2.13953	1.89509
17	34	mCYC	2.13246	1.88468
17	35	mCYC	2.12798	1.87687
17	36	mCYC	2.12139	1.86695
17	37	mCYC	2.11412	1.85635
17	38	mCYC	2.10945	1.84834
17	39	mCYC	2.10544	1.841
17	40	mCYC	2.09866	1.83089
18	1	mCYC	0.179954	0.00277898
18	2	mCYC	0.182106	0.00163711
18	3	mCYC	0.185609	0.00184635
18	4	mCYC	0.188439	0.00138372
18	5	mCYC	0.190612	0.000263063
18	6	mCYC	0.193276	-0.000366725
18	7	mCYC	0.195969	-0.000966502
18	8	mCYC	0.198261	-0.00196846
18	9	mCYC	0.201198	-0.0023245
18	10	mCYC	0.20511	-0.00170596
18	11	mCYC	0.209575	-0.000534284
18	12	mCYC	0.214074	0.000671289
18	13	mCYC	0.220399	0.003702
18	14	mCYC	0.229627	0.00963714
18	15	mCYC	0.244991	0.0217073
18	16	mCYC	0.270686	0.044109
18	17	mCYC	0.315281	0.0854101
18	18	mCYC	0.39327	0.160106
18	19	mCYC	0.52576	0.289303
18	20	mCYC	0.734288	0.494538
18	21	mCYC	1.02171	0.778662
18	22	mCYC	1.34705	1.10071
18	23	mCYC	1.64672	1.39708
18	24	mCYC	1.86833	1.61541
18	25	mCYC	2.01143	1.75522
18	26	mCYC	2.09052	1.83101
18	27	mCYC	2.13374	1.87094
18	28	mCYC	2.15483	1.88874
18	29	mCYC	2.16495	1.89556
18	30	mCYC	2.16752	1.89483
18	31	mCYC	2.16806	1.89208
18	32	mCYC	2.16444	1.88517
18	33	mCYC	2.16066	1.87809
18	34	mCYC	2.15579	1.86993
18	35	mCYC	2.15048	1.86133
18	36	mCYC	2.14303	1.85059
18	37	mCYC	2.13603	1.84029
18	38	mCYC	2.12963	1.8306
18	39	mCYC	2.12348	1.82115
18	40	mCYC	2.11912	1.8135
19	1	mCYC	0.153208	0.00409623
19	2	mCYC	0.154704	0.00230315
19	3	mCYC	0.157562	0.0018716
19	4	mCYC	0.160076	0.00109674
19	5	mCYC	0.162733	0.000464449
19	6	mCYC	0.165148	-0.000409975
19	7	mCYC	0.166828	-0.0020197
19	8	mCYC	0.169442	-0.00269452
19	9	mCYC	0.173694	-0.00173187
19	10	mCYC	0.178089	-0.000626154
19	11	mCYC	0.18292	0.000914841
19	12	mCYC	0.188429	0.00313458
19	13	mCYC	0.196248	0.00766414
19	14	mCYC	0.208691	0.016818
19	15	mCYC	0.230288	0.0351254
19	16	mCYC	0.267712	0.0692609
19	17	mCYC	0.334123	0.132382
19	18	mCYC	0.44794	0.242909
19	19	mCYC	0.632019	0.423699
19	20	mCYC	0.898668	0.687059
19	21	mCYC	1.21894	1.00404
19	22	mCYC	1.52701	1.30882
19	23	mCYC	1.76925	1.54778
19	24	mCYC	1.93521	1.71044
19	25	mCYC	2.03775	1.80969
19	26	mCYC	2.0959	1.86455
19	27	mCYC	2.13105	1.89642
19	28	mCYC	2.14964	1.91172
19	29	mCYC	2.16174	1.92053
19	30	mCYC	2.16814	1.92364
19	31	mCYC	2.17092	1.92313
19	32	mCYC	2.16627	1.91519
19	33	mCYC	2.16411	1.90973
19	34	mCYC	2.15748	1.89982
19	35	mCYC	2.15115	1.8902
19	36	mCYC	2.14311	1.87888
19	37	mCYC	2.1371	1.86957
19	38	mCYC	2.13017	1.85935
19	39	mCYC	2.12576	1.85165
19	40	mCYC	2.12252	1.84513
20	1	mCYC	0.207506	5.10197e-05
20	2	mCYC	0.210144	-0.000709224
20	3	mCYC	0.215233	0.000980001
20	4	mCYC	0.218919	0.00126776
20	5	mCYC	0.221436	0.000385576
20	6	mCYC	0.223877	-0.000572629
20	7	mCYC	0.226747	-0.00110167
20	8	mCYC	0.229477	-0.00177101
20	9	mCYC	0.233316	-0.00133071
20	10	mCYC	0.237111	-0.000934285
20	11	mCYC	0.241672	0.000227781
20	12	mCYC	0.247693	0.00284919
20	13	mCYC	0.2557	0.00745763
20	14	mCYC	0.267662	0.0160206
20	15	mCYC	0.289245	0.0342041
20	16	mCYC	0.326644	0.0682041
20	17	mCYC	0.392796	0.130957
20	18	mCYC	0.505601	0.240364
20	19	mCYC	0.68804	0.419404
20	20	mCYC	0.95167	0.679634
20	21	mCYC	1.26874	0.993305
20	22	mCYC	1.57568	1.29685
20	23	mCYC	1.81467	1.53244
20	24	mCYC	1.97846	1.69283
20	25	mCYC	2.07928	1.79025
20	26	mCYC	2.13946	1.84703
20	27	mCYC	2.17438	1.87856
20	28	mCYC	2.19093	1.8917
20	29	mCYC	2.20689	1.90427
20	30	mCYC	2.21021	1.90418
20	31	mCYC	2.20965	1.90023
20	32	mCYC	2.20463	1.89181
20	33	mCYC	2.20289	1.88667
20	34	mCYC	2.1984	1.87878
20	35	mCYC	2.19277	1.86975
20	36	mCYC	2.18757	1.86115
20	37	mCYC	2.18192	1.8521
20	38	mCYC	2.17701	1.8438
20	39	mCYC	2.17042	1.8338
20	40	mCYC	2.16252	1.82251
21	1	mCYC	0.142674	0.00289289
21	2	mCYC	0.144162	0.00104946
21	3	mCYC	0.147526	0.00108253
21	4	mCYC	0.150575	0.000800674
21	5	mCYC	0.153406	0.000300889
21	6	mCYC	0.156125	-0.000310669
21	7	mCYC	0.15869	-0.0010766
21	8	mCYC	0.161855	-0.00124309
21	9	mCYC	0.165186	-0.00124221
21	10	mCYC	0.16864	-0.00111967
21	11	mCYC	0.173022	-6.90001e-05
21	12	mCYC	0.179299	0.00287715
21	13	mCYC	0.187579	0.00782656
21	14	mCYC	0.200469	0.0173857
21	15	mCYC	0.222512	0.0360975
21	16	mCYC	0.260441	0.0706956
21	17	mCYC	0.327415	0.134339
21	18	mCYC	0.442176	0.245769
21	19	mCYC	0.627621	0.427883
21	20	mCYC	0.893459	0.69039
21	21	mCYC	1.20883	1.00243
21	22	mCYC	1.51079	1.30106
21	23	mCYC	1.7502	1.53714
21	24	mCYC	1.90879	1.6924
21	25	mCYC	2.00322	1.7835
21	26	mCYC	2.05867	1.83561
21	27	mCYC	2.09233	1.86595
21	28	mCYC	2.11316	1.88344
21	29	mCYC	2.12352	1.89047
21	30	mCYC	2.12924	1.89286
21	31	mCYC	2.13175	1.89204
21	32	mCYC	2.12841	1.88537
21	33	mCYC	2.12262	1.87625
21	34	mCYC	2.11665	1.86695
21	35	mCYC	2.10962	1.85659
21	36	mCYC	2.10431	1.84794
21	37	mCYC	2.09833	1.83863
21	38	mCYC	2.09079	1.82776
21	39	mCYC	2.08452	1.81817
21	40	mCYC	2.08013	1.81044
22	1	mCYC	0.147346	0.00229308
22	2	mCYC	0.149204	0.000531805
22	3	mCYC	0.153005	0.000713249
22	4	mCYC	0.156313	0.000402211
22	5	mCYC	0.159268	-0.000262001
22	6	mCYC	0.162939	-0.000210718
22	7	mCYC	0.166719	-4.93299e-05
22	8	mCYC	0.169901	-0.000487148
22	9	mCYC	0.173193	-0.000813848
22	10	mCYC	0.176741	-0.000885216
22	11	mCYC	0.181114	-0.000131403
22	12	mCYC	0.186589	0.0017242
22	13	mCYC	0.193619	0.00513483
22	14	mCYC	0.20587	0.0137668
22	15	mCYC	0.225286	0.0295634
22	16	mCYC	0.259184	0.0598422
22	17	mCYC	0.318163	0.115201
22	18	mCYC	0.420881	0.2143
22	19	mCYC	0.59054	0.38034
22	20	mCYC	0.840437	0.626617
22	21	mCYC	1.15044	0.932998
22	22	mCYC	1.46261	1.24155
22	23	mCYC	1.71697	1.4923
22	24	mCYC	1.89309	1.66479
22	25	mCYC	1.9965	1.76459
22	26	mCYC	2.05928	1.82375
22	27	mCYC	2.09543	1.85627
22	28	mCYC	2.11477	1.872
22	29	mCYC	2.12535	1.87895
22	30	mCYC	2.12804	1.87803
22	31	mCYC	2.12257	1.86894
22	32	mCYC	2.12047	1.86322
22	33	mCYC	2.11502	1.85415
22	34	mCYC	2.11375	1.84926
22	35	mCYC	2.10506	1.83695
22	36	mCYC	2.09603	1.8243
22	37	mCYC	2.09178	1.81643
22	38	mCYC	2.0869	1.80794
22	39	mCYC	2.08208	1.79949
22	40	mCYC	2.07816	1.79195
23	1	mCYC	0.172862	0.000632736
23	2	mCYC	0.174836	-0.00107696
23	3	mCYC	0.179973	0.00037659
23	4	mCYC	0.184073	0.000793483
23	5	mCYC	0.187343	0.000379695
23	6	mCYC	0.190985	0.000338138
23	7	mCYC	0.194725	0.000394362
23	8	mCYC	0.197325	-0.000690067
23	9	mCYC	0.199776	-0.00192191
23	10	mCYC	0.203637	-0.00174481
23	11	mCYC	0.207701	-0.00136505
23	12	mCYC	0.213174	0.000424594
23	13	mCYC	0.219448	0.00301498
23	14	mCYC	0.229699	0.00958276
23	15	mCYC	0.247768	0.0239681
23	16	mCYC	0.277795	0.0503107
23	17	mCYC	0.330418	0.0992501
23	18	mCYC	0.422407	0.187556
23	19	mCYC	0.571863	0.333328
23	20	mCYC	0.791424	0.549205
23	21	mCYC	1.06319	0.81729
23	22	mCYC	1.33603	1.08644
23	23	mCYC	1.56108	1.30781
23	24	mCYC	1.71522	1.45827
23	25	mCYC	1.81247	1.55184
23	26	mCYC	1.86688	1.60256
23	27	mCYC	1.90298	1.63498
23	28	mCYC	1.92653	1.65485
23	29	mCYC	1.93553	1.66016
23	30	mCYC	1.9362	1.65715
23	31	mCYC	1.93861	1.65587
23	32	mCYC	1.94063	1.65421
23	33	mCYC	1.94013	1.65002
23	34	mCYC	1.93692	1.64313
23	35	mCYC	1.93214	1.63467
23	36	mCYC	1.93252	1.63137
23	37	mCYC	1.93083	1.62598
23	38	mCYC	1.93004	1.62151
23	39	mCYC	1.92765	1.61544
23	40	mCYC	1.92814	1.61225
24	1	mCYC	0.133957	0.000799652
24	2	mCYC	0.1366	-0.000438294
24	3	mCYC	0.141469	0.000548132
24	4	mCYC	0.145342	0.000539994
24	5	mCYC	0.148711	2.63344e-05
24	6	mCYC	0.152545	-2.1336e-05
24	7	mCYC	0.155906	-0.000542223
24	8	mCYC	0.159393	-0.000936434
24	9	mCYC	0.163736	-0.000475752
24	10	mCYC	0.167477	-0.000616614
24	11	mCYC	0.171783	-0.000192126
24	12	mCYC	0.177527	0.00167003
24	13	mCYC	0.185315	0.00557605
24	14	mCYC	0.198374	0.0147531
24	15	mCYC	0.217839	0.0303362
24	16	mCYC	0.251784	0.0603999
24	17	mCYC	0.312671	0.117404
24	18	mCYC	0.41752	0.218372
24	19	mCYC	0.589169	0.386139
24	20	mCYC	0.834922	0.62801
24	21	mCYC	1.1348	0.924011
24	22	mCYC	1.43376	1.21908
24	23	mCYC	1.67613	1.45757
24	24	mCYC	1.83961	1.61717
24	25	mCYC	1.93968	1.71335
24	26	mCYC	1.9954	1.76519
24	27	mCYC	2.03032	1.79623
24	28	mCYC	2.05212	1.81415
24	29	mCYC	2.06102	1.81917
24	30	mCYC	2.05804	1.81231
24	31	mCYC	2.05713	1.80752
24	32	mCYC	2.05267	1.79917
24	33	mCYC	2.04847	1.79109
24	34	mCYC	2.04613	1.78488
24	35	mCYC	2.03948	1.77434
24	36	mCYC	2.02967	1.76065
24	37	mCYC	2.02454	1.75163
24	38	mCYC	2.0186	1.74182
24	39	mCYC	2.01142	1.73075
24	40	mCYC	2.00778	1.72323
25	1	mGNAL	0.281302	-0.0143328
25	2	mGNAL	0.284789	-0.0119532
25	3	mGNAL	0.291947	-0.00590317
25	4	mGNAL	0.297535	-0.00142291
25	5	mGNAL	0.300553	0.000488174
25	6	mGNAL	0.301828	0.000655675
25	7	mGNAL	0.302974	0.000694162
25	8	mGNAL	0.304334	0.00094648
25	9	mGNAL	0.305963	0.0014677
25	10	mGNAL	0.308102	0.00249962
25	11	mGNAL	0.308716	0.00200599
25	12	mGNAL	0.309071	0.00125346
25	13	mGNAL	0.309517	0.000591266
25	14	mGNAL	0.310414	0.00038147
25	15	mGNAL	0.312094	0.000954163
25	16	mGNAL	0.312548	0.000299746
25	17	mGNAL	0.31378	0.000425017
25	18	mGNAL	0.315089	0.000626582
25	19	mGNAL	0.315212	-0.000358909
25	20	mGNAL	0.315345	-0.00133317
25	21	mGNAL	0.315554	-0.00223184
25	22	mGNAL	0.31661	-0.00228321
25	23	mGNAL	0.318649	-0.00135155
25	24	mGNAL	0.320679	-0.000429571
25	25	mGNAL	0.32424	0.00202481
25	26	mGNAL	0.330756	0.0074326
25	27	mGNAL	0.342854	0.0184231
25	28	mGNAL	0.365194	0.0396562
25	29	mGNAL	0.409349	0.0827028
25	30	mGNAL	0.490485	0.162732
25	31	mGNAL	0.629478	0.300617
25	32	mGNAL	0.84721	0.517241
25	33	mGNAL	1.14291	0.811839
25	34	mGNAL	1.46508	1.13289
25	35	mGNAL	1.73845	1.40516
25	36	mGNAL	1.9253	1.5909
25	37	mGNAL	2.04159	1.70608
25	38	mGNAL	2.1097	1.77308
25	39	mGNAL	2.15253	1.81481
25	40	mGNAL	2.17781	1.83898
26	1	mGNAL	0.073011	-0.00596956
26	2	mGNAL	0.0752037	-0.00460384
26	3	mGNAL	0.0787328	-0.00190163
26	4	mGNAL	0.0812381	-0.000223316
26	5	mGNAL	0.082468	0.000179648
26	6	mGNAL	0.0835311	0.000415868
26	7	mGNAL	0.0843491	0.000406949
26	8	mGNAL	0.0855214	0.000752246
26	9	mGNAL	0.0863356	0.000739504
26	10	mGNAL	0.0868089	0.000385907
26	11	mGNAL	0.0883145	0.00106453
26	12	mGNAL	0.0893165	0.00123967
26	13	mGNAL	0.0894631	0.000559332
26	14	mGNAL	0.0898667	0.000136026
26	15	mGNAL	0.0903998	-0.000157848
26	16	mGNAL	0.0905206	-0.000864007
26	17	mGNAL	0.0914668	-0.000744761
26	18	mGNAL	0.092327	-0.000711502
26	19	mGNAL	0.0928445	-0.0010209
26	20	mGNAL	0.093675	-0.00101734
26	21	mGNAL	0.0940812	-0.00143806
26	22	mGNAL	0.0949448	-0.00140141
26	23	mGNAL	0.0964741	-0.000698982
26	24	mGNAL	0.0989293	0.00092929
26	25	mGNAL	0.102198	0.00337077
26	26	mGNAL	0.107631	0.00797751
26	27	mGNAL	0.118478	0.0179972
26	28	mGNAL	0.138997	0.0376891
26	29	mGNAL	0.178357	0.0762223
26	30	mGNAL	0.250566	0.147604
26	31	mGNAL	0.379548	0.275759
26	32	mGNAL	0.59166	0.487045
26	33	mGNAL	0.892418	0.786976
26	34	mGNAL	1.23875	1.13248
26	35	mGNAL	1.5554	1.4483
26	36	mGNAL	1.77941	1.67149
26	37	mGNAL	1.91669	1.80794
26	38	mGNAL	1.99417	1.88459
26	39	mGNAL	2.042	1.93159
26	40	mGNAL	2.07573	1.9645
27	1	mGNAL	0.129311	-0.00375387
27	2	mGNAL	0.130849	-0.00306011
27	3	mGNAL	0.133086	-0.0016676
27	4	mGNAL	0.134774	-0.000823428
27	5	mGNAL	0.136546	0.00010374
27	6	mGNAL	0.137697	0.000410201
27	7	mGNAL	0.138743	0.000611996
27	8	mGNAL	0.139576	0.000600108
27	9	mGNAL	0.140545	0.000724924
27	10	mGNAL	0.141544	0.000879646
27	11	mGNAL	0.142466	0.000956956
27	12	mGNAL	0.142913	0.000560529
27	13	mGNAL	0.143118	-7.92339e-05
27	14	mGNAL	0.144153	0.000111281
27	15	mGNAL	0.145024	0.000137838
27	16	mGNAL	0.145329	-0.000401879
27	17	mGNAL	0.145835	-0.000739386
27	18	mGNAL	0.14648	-0.000939535
27	19	mGNAL	0.147884	-0.000380008
27	20	mGNAL	0.148509	-0.000599499
27	21	mGNAL	0.148912	-0.0010403
27	22	mGNAL	0.150449	-0.00034799
27	23	mGNAL	0.152074	0.000433206
27	24	mGNAL	0.153974	0.00148844
27	25	mGNAL	0.158287	0.00495679
27	26	mGNAL	0.166433	0.0122582
27	27	mGNAL	0.181146	0.0261269
27	28	mGNAL	0.209471	0.0536076
27	29	mGNAL	0.261929	0.105221
27	30	mGNAL	0.359334	0.201782
27	31	mGNAL	0.525287	0.366891
27	32	mGNAL	0.780358	0.621117
27	33	mGNAL	1.11069	0.950605
27	34	mGNAL	1.45155	1.29062
27	35	mGNAL	1.7256	1.56383
27	36	mGNAL	1.90707	1.74445
27	37	mGNAL	2.0114	1.84794
27	38	mGNAL	2.07233	1.90802
27	39	mGNAL	2.1173	1.95215
27	40	mGNAL	2.14489	1.97889
28	1	mGNAL	0.859675	-0.0486252
28	2	mGNAL	0.870512	-0.0409713
28	3	mGNAL	0.890725	-0.0239398
28	4	mGNAL	0.904964	-0.0128838
28	5	mGNAL	0.915967	-0.0050627
28	6	mGNAL	0.922549	-0.00166315
28	7	mGNAL	0.931018	0.00362444
28	8	mGNAL	0.93821	0.00763392
28	9	mGNAL	0.941966	0.00820762
28	10	mGNAL	0.947349	0.0104082
28	11	mGNAL	0.950453	0.0103298
28	12	mGNAL	0.953269	0.00996422
28	13	mGNAL	0.955686	0.00919878
28	14	mGNAL	0.955547	0.00587713
28	15	mGNAL	0.958564	0.00571232
28	16	mGNAL	0.958158	0.00212341
28	17	mGNAL	0.960628	0.00141185
28	18	mGNAL	0.962085	-0.000313826
28	19	mGNAL	0.963556	-0.0020246
28	20	mGNAL	0.965061	-0.00370199
28	21	mGNAL	0.967247	-0.00469823
28	22	mGNAL	0.970056	-0.00507171
28	23	mGNAL	0.971217	-0.00709249
28	24	mGNAL	0.973453	-0.00803942
28	25	mGNAL	0.979661	-0.005013
28	26	mGNAL	0.989352	0.00149517
28	27	mGNAL	1.00991	0.0188745
28	28	mGNAL	1.04479	0.0505717
28	29	mGNAL	1.11078	0.113373
28	30	mGNAL	1.22964	0.22906
28	31	mGNAL	1.41738	0.413615
28	32	mGNAL	1.65909	0.652137
28	33	mGNAL	1.89561	0.885474
28	34	mGNAL	2.06988	1.05656
28	35	mGNAL	2.18922	1.17273
28	36	mGNAL	2.27701	1.25734
28	37	mGNAL	2.3382	1.31534
28	38	mGNAL	2.3765	1.35045
28	39	mGNAL	2.39987	1.37064
28	40	mGNAL	2.41581	1.3834
29	1	mGNAL	0.105447	-0.0100677
29	2	mGNAL	0.107771	-0.00857931
29	3	mGNAL	0.112652	-0.00453541
29	4	mGNAL	0.115862	-0.00216115
29	5	mGNAL	0.117816	-0.00104393
29	6	mGNAL	0.120369	0.000672528
29	7	mGNAL	0.122467	0.0019341
29	8	mGNAL	0.123896	0.00252721
29	9	mGNAL	0.124915	0.00270956
29	10	mGNAL	0.125634	0.00259162
29	11	mGNAL	0.125688	0.00180923
29	12	mGNAL	0.126446	0.00173093
29	13	mGNAL	0.126287	0.000735915
29	14	mGNAL	0.126143	-0.00024502
29	15	mGNAL	0.126601	-0.000623084
29	16	mGNAL	0.127312	-0.000748931
29	17	mGNAL	0.128178	-0.000719373
29	18	mGNAL	0.127963	-0.00177079
29	19	mGNAL	0.128713	-0.00185663
29	20	mGNAL	0.129914	-0.00149227
29	21	mGNAL	0.130588	-0.00165457
29	22	mGNAL	0.131833	-0.00124573
29	23	mGNAL	0.13324	-0.000675514
29	24	mGNAL	0.135474	0.000722357
29	25	mGNAL	0.138927	0.00333895
29	26	mGNAL	0.145748	0.00932307
29	27	mGNAL	0.157525	0.0202642
29	28	mGNAL	0.178917	0.0408197
29	29	mGNAL	0.220914	0.0819807
29	30	mGNAL	0.298691	0.158921
29	31	mGNAL	0.436206	0.295599
29	32	mGNAL	0.659035	0.517592
29	33	mGNAL	0.967589	0.82531
29	34	mGNAL	1.30822	1.1651
29	35	mGNAL	1.60754	1.46358
29	36	mGNAL	1.81482	1.67003
29	37	mGNAL	1.9326	1.78698
29	38	mGNAL	2.00281	1.85635
29	39	mGNAL	2.05205	1.90475
29	40	mGNAL	2.08598	1.93784
30	1	mGNAL	1.12298	-0.0897164
30	2	mGNAL	1.14506	-0.0717697
30	3	mGNAL	1.18262	-0.0383324
30	4	mGNAL	1.20816	-0.01692
30	5	mGNAL	1.22674	-0.00247527
30	6	mGNAL	1.23803	0.00468969
30	7	mGNAL	1.24589	0.00842583
30	8	mGNAL	1.25009	0.00848973
30	9	mGNAL	1.25593	0.0102065
30	10	mGNAL	1.26091	0.0110595
30	11	mGNAL	1.26369	0.00970972
30	12	mGNAL	1.26777	0.00965536
30	13	mGNAL	1.27307	0.0108304
30	14	mGNAL	1.27524	0.0088743
30	15	mGNAL	1.2743	0.00380099
30	16	mGNAL	1.27876	0.00413764
30	17	mGNAL	1.28176	0.00300802
30	18	mGNAL	1.28448	0.00159479
30	19	mGNAL	1.28628	-0.000733125
30	20	mGNAL	1.28885	-0.00228726
30	21	mGNAL	1.29271	-0.00256179
30	22	mGNAL	1.29477	-0.00463079
30	23	mGNAL	1.29582	-0.00770448
30	24	mGNAL	1.29737	-0.0102846
30	25	mGNAL	1.30323	-0.00855277
30	26	mGNAL	1.30816	-0.0077493
30	27	mGNAL	1.32089	0.000851057
30	28	mGNAL	1.34481	0.0206433
30	29	mGNAL	1.38916	0.060865
30	30	mGNAL	1.47522	0.142794
30	31	mGNAL	1.62051	0.283958
30	32	mGNAL	1.84493	0.504245
30	33	mGNAL	2.13969	0.794879
30	34	mGNAL	2.44535	1.09641
30	35	mGNAL	2.68688	1.33381
30	36	mGNAL	2.83113	1.47393
30	37	mGNAL	2.92264	1.56131
30	38	mGNAL	2.98942	1.62396
30	39	mGNAL	3.03575	1.66616
30	40	mGNAL	3.06492	1.69121
31	1	mGNAL	0.244253	-0.0121997
31	2	mGNAL	0.248089	-0.00959039
31	3	mGNAL	0.25368	-0.00522689
31	4	mGNAL	0.257	-0.00313404
31	5	mGNAL	0.260139	-0.00122177
31	6	mGNAL	0.263009	0.000421535
31	7	mGNAL	0.26593	0.00211464
31	8	mGNAL	0.267672	0.00263038
31	9	mGNAL	0.268209	0.00193939
31	10	mGNAL	0.269745	0.00224824
31	11	mGNAL	0.271433	0.00270961
31	12	mGNAL	0.271834	0.00188365
31	13	mGNAL	0.272277	0.00109899
31	14	mGNAL	0.273054	0.000649758
31	15	mGNAL	0.273809	0.000177428
31	16	mGNAL	0.275051	0.000191919
31	17	mGNAL	0.275899	-0.000186683
31	18	mGNAL	0.27677	-0.00054338
31	19	mGNAL	0.277255	-0.00128497
31	20	mGNAL	0.27833	-0.00143714
31	21	mGNAL	0.279374	-0.00162003
31	22	mGNAL	0.280292	-0.00192934
31	23	mGNAL	0.281425	-0.00202369
31	24	mGNAL	0.284624	-5.1659e-05
31	25	mGNAL	0.288497	0.00259405
31	26	mGNAL	0.295931	0.00880146
31	27	mGNAL	0.310048	0.0216913
31	28	mGNAL	0.335449	0.0458652
31	29	mGNAL	0.384633	0.0938214
31	30	mGNAL	0.475107	0.183069
31	31	mGNAL	0.632568	0.339303
31	32	mGNAL	0.878762	0.584269
31	33	mGNAL	1.20483	0.909113
31	34	mGNAL	1.53581	1.23887
31	35	mGNAL	1.78231	1.48414
31	36	mGNAL	1.93903	1.63963
31	37	mGNAL	2.05212	1.75149
31	38	mGNAL	2.13532	1.83347
31	39	mGNAL	2.18835	1.88527
31	40	mGNAL	2.21218	1.90787
32	1	mGNAL	0.0529577	-0.0033555
32	2	mGNAL	0.0539227	-0.00317034
32	3	mGNAL	0.0561537	-0.00171928
32	4	mGNAL	0.0584044	-0.000248432
32	5	mGNAL	0.0598774	0.000444632
32	6	mGNAL	0.0608963	0.00068361
32	7	mGNAL	0.0618672	0.000874665
32	8	mGNAL	0.0625326	0.000760164
32	9	mGNAL	0.0638317	0.00127929
32	10	mGNAL	0.0644625	0.00113019
32	11	mGNAL	0.0647252	0.000613048
32	12	mGNAL	0.065238	0.000345956
32	13	mGNAL	0.0656011	-7.08181e-05
32	14	mGNAL	0.0663251	-0.000126791
32	15	mGNAL	0.0667026	-0.000529178
32	16	mGNAL	0.0672525	-0.000759137
32	17	mGNAL	0.0675169	-0.00127463
32	18	mGNAL	0.0678408	-0.00173065
32	19	mGNAL	0.0688203	-0.00153105
32	20	mGNAL	0.0700149	-0.00111638
32	21	mGNAL	0.0707392	-0.00117202
32	22	mGNAL	0.0718797	-0.000811329
32	23	mGNAL	0.0731613	-0.000309685
32	24	mGNAL	0.0754321	0.00118123
32	25	mGNAL	0.0791174	0.00408658
32	26	mGNAL	0.0849843	0.00917357
32	27	mGNAL	0.097407	0.0208165
32	28	mGNAL	0.119932	0.0425616
32	29	mGNAL	0.161957	0.0838066
32	30	mGNAL	0.240687	0.161757
32	31	mGNAL	0.379568	0.299858
32	32	mGNAL	0.603441	0.522951
32	33	mGNAL	0.910576	0.829306
32	34	mGNAL	1.25715	1.1751
32	35	mGNAL	1.56434	1.48151
32	36	mGNAL	1.7745	1.69089
32	37	mGNAL	1.89827	1.81388
32	38	mGNAL	1.96958	1.88441
32	39	mGNAL	2.0173	1.93135
32	40	mGNAL	2.05034	1.96361
33	1	mGNAL	0.0744461	-0.00502926
33	2	mGNAL	0.0758162	-0.00454121
33	3	mGNAL	0.0786187	-0.00262077
33	4	mGNAL	0.0813274	-0.000794049
33	5	mGNAL	0.0832322	0.000228719
33	6	mGNAL	0.0845505	0.00066497
33	7	mGNAL	0.085863	0.00109546
33	8	mGNAL	0.086827	0.00117742
33	9	mGNAL	0.0878324	0.00130074
33	10	mGNAL	0.0884247	0.00101108
33	11	mGNAL	0.0891674	0.00087171
33	12	mGNAL	0.0898634	0.000685636
33	13	mGNAL	0.0905667	0.000506894
33	14	mGNAL	0.0913537	0.000411934
33	15	mGNAL	0.0918512	2.74137e-05
33	16	mGNAL	0.0919456	-0.00076022
33	17	mGNAL	0.0924815	-0.00110635
33	18	mGNAL	0.0931162	-0.00135377
33	19	mGNAL	0.0938132	-0.00153874
33	20	mGNAL	0.095059	-0.001175
33	21	mGNAL	0.0956844	-0.0014316
33	22	mGNAL	0.0965977	-0.00140036
33	23	mGNAL	0.0982504	-0.000629705
33	24	mGNAL	0.100631	0.000868752
33	25	mGNAL	0.104604	0.00395982
33	26	mGNAL	0.110967	0.00944048
33	27	mGNAL	0.122547	0.0201389
33	28	mGNAL	0.145318	0.0420277
33	29	mGNAL	0.188031	0.0838587
33	30	mGNAL	0.267342	0.162288
33	31	mGNAL	0.407116	0.301179
33	32	mGNAL	0.63189	0.525072
33	33	mGNAL	0.940937	0.833237
33	34	mGNAL	1.28246	1.17388
33	35	mGNAL	1.57892	1.46946
33	36	mGNAL	1.77982	1.66947
33	37	mGNAL	1.89134	1.78011
33	38	mGNAL	1.95404	1.84193
33	39	mGNAL	1.99802	1.88502
33	40	mGNAL	2.02563	1.91176
34	1	mGNAL	0.0764835	-0.0043452
34	2	mGNAL	0.0780168	-0.0036288
34	3	mGNAL	0.0806635	-0.00179901
34	4	mGNAL	0.0827354	-0.000544072
34	5	mGNAL	0.0845401	0.00044366
34	6	mGNAL	0.085903	0.000989595
34	7	mGNAL	0.0865493	0.000818934
34	8	mGNAL	0.087503	0.000955705
34	9	mGNAL	0.0882839	0.000919639
34	10	mGNAL	0.088965	0.000783846
34	11	mGNAL	0.0897744	0.000776255
34	12	mGNAL	0.0897042	-0.000110921
34	13	mGNAL	0.0907433	0.000111234
34	14	mGNAL	0.0915309	8.19026e-05
34	15	mGNAL	0.0921064	-0.000159502
34	16	mGNAL	0.0924549	-0.000627971
34	17	mGNAL	0.0926446	-0.00125524
34	18	mGNAL	0.0928185	-0.0018983
34	19	mGNAL	0.0938068	-0.00172687
34	20	mGNAL	0.0950333	-0.00131734
34	21	mGNAL	0.0963122	-0.000855363
34	22	mGNAL	0.0977009	-0.000283671
34	23	mGNAL	0.100108	0.00130691
34	24	mGNAL	0.103009	0.00339058
34	25	mGNAL	0.108981	0.00854593
34	26	mGNAL	0.120286	0.0190335
34	27	mGNAL	0.14208	0.0400106
34	28	mGNAL	0.183493	0.0806065
34	29	mGNAL	0.258719	0.155016
34	30	mGNAL	0.392795	0.288275
34	31	mGNAL	0.611222	0.505885
34	32	mGNAL	0.913802	0.807648
34	33	mGNAL	1.24944	1.14247
34	34	mGNAL	1.5222	1.41441
34	35	mGNAL	1.70676	1.59816
34	36	mGNAL	1.83748	1.72806
34	37	mGNAL	1.92538	1.81515
34	38	mGNAL	1.981	1.86994
34	39	mGNAL	2.01782	1.90595
34	40	mGNAL	2.03413	1.92144
35	1	mGNAL	0.0608306	-0.00313605
35	2	mGNAL	0.0622241	-0.00251738
35	3	mGNAL	0.0647221	-0.000794199
35	4	mGNAL	0.0658083	-0.000482793
35	5	mGNAL	0.0669191	-0.000146681
35	6	mGNAL	0.0683868	0.00054618
35	7	mGNAL	0.0692539	0.000638532
35	8	mGNAL	0.0704904	0.00110019
35	9	mGNAL	0.070952	0.000787056
35	10	mGNAL	0.071641	0.000701227
35	11	mGNAL	0.0725957	0.000881183
35	12	mGNAL	0.0732235	0.000734162
35	13	mGNAL	0.0733549	9.08363e-05
35	14	mGNAL	0.0734829	-0.000555984
35	15	mGNAL	0.0744221	-0.000391526
35	16	mGNAL	0.0752224	-0.000366065
35	17	mGNAL	0.0751882	-0.00117504
35	18	mGNAL	0.0756723	-0.00146568
35	19	mGNAL	0.0759726	-0.00194019
35	20	mGNAL	0.0772499	-0.00143773
35	21	mGNAL	0.0783551	-0.00110724
35	22	mGNAL	0.0797497	-0.000487454
35	23	mGNAL	0.0812898	0.000277887
35	24	mGNAL	0.0828263	0.00103954
35	25	mGNAL	0.0861153	0.00355379
35	26	mGNAL	0.0913964	0.00806013
35	27	mGNAL	0.101078	0.0169671
35	28	mGNAL	0.118743	0.033857
35	29	mGNAL	0.152565	0.0669047
35	30	mGNAL	0.216867	0.130432
35	31	mGNAL	0.332121	0.244911
35	32	mGNAL	0.525104	0.437119
35	33	mGNAL	0.810767	0.722007
35	34	mGNAL	1.15966	1.07013
35	35	mGNAL	1.49221	1.4019
35	36	mGNAL	1.7325	1.64141
35	37	mGNAL	1.87293	1.78107
35	38	mGNAL	1.95848	1.86585
35	39	mGNAL	2.0239	1.93049
35	40	mGNAL	2.06123	1.96705
36	1	mGNAL	0.0793477	-0.00268791
36	2	mGNAL	0.0805869	-0.00230145
36	3	mGNAL	0.0830471	-0.000694044
36	4	mGNAL	0.0844763	-0.000117563
36	5	mGNAL	0.0855911	0.000144585
36	6	mGNAL	0.0865017	0.000202394
36	7	mGNAL	0.0878259	0.000673889
36	8	mGNAL	0.0887906	0.000785908
36	9	mGNAL	0.0894391	0.000581621
36	10	mGNAL	0.0902836	0.000573365
36	11	mGNAL	0.0914378	0.000874898
36	12	mGNAL	0.0924285	0.00101289
36	13	mGNAL	0.0925444	0.00027599
36	14	mGNAL	0.0929676	-0.000153521
36	15	mGNAL	0.0935923	-0.000381547
36	16	mGNAL	0.0940824	-0.000744152
36	17	mGNAL	0.0944787	-0.00120056
36	18	mGNAL	0.0948511	-0.00168095
36	19	mGNAL	0.0955778	-0.00180692
36	20	mGNAL	0.0967084	-0.00152904
36	21	mGNAL	0.0974141	-0.00167606
36	22	mGNAL	0.0990632	-0.000879701
36	23	mGNAL	0.100244	-0.000552025
36	24	mGNAL	0.103031	0.00138253
36	25	mGNAL	0.107409	0.00490801
36	26	mGNAL	0.114582	0.0112287
36	27	mGNAL	0.127993	0.0237865
36	28	mGNAL	0.153354	0.048295
36	29	mGNAL	0.202326	0.096414
36	30	mGNAL	0.292037	0.185273
36	31	mGNAL	0.446683	0.339065
36	32	mGNAL	0.691272	0.582802
36	33	mGNAL	1.01921	0.90989
36	34	mGNAL	1.37116	1.26099
36	35	mGNAL	1.66734	1.55631
36	36	mGNAL	1.86469	1.75281
36	37	mGNAL	1.97827	1.86554
36	38	mGNAL	2.0427	1.92912
36	39	mGNAL	2.08803	1.97359
36	40	mGNAL	2.11569	2.0004
37	1	mGNAL	0.075506	-0.00554819
37	2	mGNAL	0.077447	-0.00444324
37	3	mGNAL	0.0804316	-0.00229484
37	4	mGNAL	0.0824933	-0.00106919
37	5	mGNAL	0.0844658	6.71348e-05
37	6	mGNAL	0.0860846	0.000849847
37	7	mGNAL	0.0869713	0.000900391
37	8	mGNAL	0.087396	0.000489029
37	9	mGNAL	0.0888138	0.0010707
37	10	mGNAL	0.0897039	0.00112464
37	11	mGNAL	0.0902737	0.00085833
37	12	mGNAL	0.0913338	0.00108232
37	13	mGNAL	0.0917461	0.000658542
37	14	mGNAL	0.0918125	-0.000111246
37	15	mGNAL	0.0924395	-0.000320362
37	16	mGNAL	0.0932312	-0.000364783
37	17	mGNAL	0.0936369	-0.000795196
37	18	mGNAL	0.0940089	-0.00125934
37	19	mGNAL	0.0948186	-0.00128568
37	20	mGNAL	0.0960719	-0.000868542
37	21	mGNAL	0.096896	-0.00088059
37	22	mGNAL	0.0979166	-0.000696084
37	23	mGNAL	0.100098	0.000648849
37	24	mGNAL	0.102481	0.00219607
37	25	mGNAL	0.106503	0.00538158
37	26	mGNAL	0.114657	0.0126999
37	27	mGNAL	0.128938	0.0261452
37	28	mGNAL	0.156028	0.0523984
37	29	mGNAL	0.206773	0.102307
37	30	mGNAL	0.299825	0.194523
37	31	mGNAL	0.462059	0.355921
37	32	mGNAL	0.717022	0.610049
37	33	mGNAL	1.04992	0.942115
37	34	mGNAL	1.39325	1.28461
37	35	mGNAL	1.67658	1.5671
37	36	mGNAL	1.86024	1.74992
37	37	mGNAL	1.97082	1.85966
37	38	mGNAL	2.03381	1.92182
37	39	mGNAL	2.07719	1.96436
37	40	mGNAL	2.10535	1.99169
38	1	mGNAL	0.062413	-0.00402202
38	2	mGNAL	0.063769	-0.00348499
38	3	mGNAL	0.0667182	-0.00135482
38	4	mGNAL	0.0687249	-0.000167165
38	5	mGNAL	0.0701057	0.000394622
38	6	mGNAL	0.0715087	0.000978597
38	7	mGNAL	0.0721777	0.000828607
38	8	mGNAL	0.0730062	0.000838075
38	9	mGNAL	0.0737054	0.000718186
38	10	mGNAL	0.0747251	0.000918866
38	11	mGNAL	0.0753133	0.00068806
38	12	mGNAL	0.0756555	0.000211244
38	13	mGNAL	0.0760936	-0.000169684
38	14	mGNAL	0.0766948	-0.000387436
38	15	mGNAL	0.076917	-0.000984289
38	16	mGNAL	0.0780933	-0.000627013
38	17	mGNAL	0.0784762	-0.00106313
38	18	mGNAL	0.0786613	-0.00169704
38	19	mGNAL	0.0795374	-0.00164002
38	20	mGNAL	0.0805499	-0.00144646
38	21	mGNAL	0.0811064	-0.00170906
38	22	mGNAL	0.0830639	-0.000570555
38	23	mGNAL	0.0860172	0.00156373
38	24	mGNAL	0.0899492	0.00467669
38	25	mGNAL	0.0969345	0.010843
38	26	mGNAL	0.110662	0.0237512
38	27	mGNAL	0.136347	0.0486172
38	28	mGNAL	0.185113	0.0965642
38	29	mGNAL	0.274564	0.185196
38	30	mGNAL	0.429919	0.339733
38	31	mGNAL	0.674536	0.583531
38	32	mGNAL	0.998337	0.906512
38	33	mGNAL	1.33027	1.23762
38	34	mGNAL	1.57782	1.48436
38	35	mGNAL	1.74262	1.64834
38	36	mGNAL	1.8605	1.7654
38	37	mGNAL	1.93982	1.8439
38	38	mGNAL	1.99247	1.89573
38	39	mGNAL	2.0251	1.92754
38	40	mGNAL	2.04512	1.94674
39	1	mGNAL	0.0871138	-0.00383357
39	2	mGNAL	0.0880686	-0.00368836
39	3	mGNAL	0.0908123	-0.00175421
39	4	mGNAL	0.0927125	-0.000663589
39	5	mGNAL	0.0939967	-0.000188867
39	6	mGNAL	0.0955376	0.000542476
39	7	mGNAL	0.0969191	0.00111438
39	8	mGNAL	0.0979268	0.00131257
39	9	mGNAL	0.0982767	0.000852952
39	10	mGNAL	0.0988296	0.000596296
39	11	mGNAL	0.0994261	0.000383188
39	12	mGNAL	0.100123	0.00027079
39	13	mGNAL	0.100747	8.54874e-05
39	14	mGNAL	0.101418	-5.33605e-05
39	15	mGNAL	0.102055	-0.000225974
39	16	mGNAL	0.102903	-0.000188027
39	17	mGNAL	0.103304	-0.000596534
39	18	mGNAL	0.10394	-0.000770176
39	19	mGNAL	0.104383	-0.00113674
39	20	mGNAL	0.104966	-0.00136308
39	21	mGNAL	0.106225	-0.000913388
39	22	mGNAL	0.107938	-1.03914e-05
39	23	mGNAL	0.109198	0.000440198
39	24	mGNAL	0.111833	0.002266
39	25	mGNAL	0.116216	0.00583931
39	26	mGNAL	0.123755	0.0125691
39	27	mGNAL	0.138142	0.0261461
39	28	mGNAL	0.164618	0.0518132
39	29	mGNAL	0.215973	0.102358
39	30	mGNAL	0.310496	0.196071
39	31	mGNAL	0.47421	0.358976
39	32	mGNAL	0.727644	0.6116
39	33	mGNAL	1.06113	0.944275
39	34	mGNAL	1.41226	1.2946
39	35	mGNAL	1.7019	1.58343
39	36	mGNAL	1.89112	1.77184
39	37	mGNAL	2.00073	1.88064
39	38	mGNAL	2.06345	1.94255
39	39	mGNAL	2.1087	1.98699
39	40	mGNAL	2.13713	2.01461
40	1	mGNAL	0.105259	-0.00559577
40	2	mGNAL	0.106923	-0.00474232
40	3	mGNAL	0.11023	-0.002246
40	4	mGNAL	0.112709	-0.000578611
40	5	mGNAL	0.114354	0.000255674
40	6	mGNAL	0.115577	0.00066819
40	7	mGNAL	0.116321	0.000601774
40	8	mGNAL	0.117299	0.000768451
40	9	mGNAL	0.118383	0.00104158
40	10	mGNAL	0.118853	0.000700954
40	11	mGNAL	0.119622	0.000659386
40	12	mGNAL	0.120297	0.00052298
40	13	mGNAL	0.120969	0.000384838
40	14	mGNAL	0.121558	0.000162512
40	15	mGNAL	0.12196	-0.00024584
40	16	mGNAL	0.122867	-0.000150153
40	17	mGNAL	0.122987	-0.000840913
40	18	mGNAL	0.123554	-0.00108426
40	19	mGNAL	0.124532	-0.000917864
40	20	mGNAL	0.125388	-0.000872543
40	21	mGNAL	0.126423	-0.000647626
40	22	mGNAL	0.127274	-0.000607378
40	23	mGNAL	0.12892	0.000227265
40	24	mGNAL	0.131701	0.00219758
40	25	mGNAL	0.136127	0.00581302
40	26	mGNAL	0.143701	0.0125763
40	27	mGNAL	0.157039	0.0251035
40	28	mGNAL	0.183084	0.0503375
40	29	mGNAL	0.231952	0.0983946
40	30	mGNAL	0.321591	0.187222
40	31	mGNAL	0.477635	0.342456
40	32	mGNAL	0.726519	0.590529
40	33	mGNAL	1.05968	0.922883
40	34	mGNAL	1.41032	1.27271
40	35	mGNAL	1.70554	1.56712
40	36	mGNAL	1.90593	1.7667
40	37	mGNAL	2.02308	1.88303
40	38	mGNAL	2.09094	1.95008
40	39	mGNAL	2.13025	1.98858
40	40	mGNAL	2.15557	2.0131
41	1	mGNAL	0.104483	-0.00619154
41	2	mGNAL	0.106755	-0.00477378
41	3	mGNAL	0.11042	-0.00196332
41	4	mGNAL	0.112504	-0.000733465
41	5	mGNAL	0.114221	0.000128458
41	6	mGNAL	0.115746	0.000799392
41	7	mGNAL	0.116876	0.00107477
41	8	mGNAL	0.117597	0.000941158
41	9	mGNAL	0.118285	0.000774461
41	10	mGNAL	0.11905	0.000685577
41	11	mGNAL	0.119693	0.000474259
41	12	mGNAL	0.120552	0.000477956
41	13	mGNAL	0.121567	0.000638928
41	14	mGNAL	0.121955	0.000172538
41	15	mGNAL	0.121912	-0.0007255
41	16	mGNAL	0.122626	-0.000865808
41	17	mGNAL	0.123374	-0.000971991
41	18	mGNAL	0.12436	-0.000840934
41	19	mGNAL	0.125372	-0.000683121
41	20	mGNAL	0.125773	-0.00113637
41	21	mGNAL	0.126913	-0.000850904
41	22	mGNAL	0.128134	-0.000484177
41	23	mGNAL	0.130131	0.000657917
41	24	mGNAL	0.132758	0.00243018
41	25	mGNAL	0.13782	0.00663744
41	26	mGNAL	0.147941	0.0159039
41	27	mGNAL	0.165577	0.0326856
41	28	mGNAL	0.199148	0.0654025
41	29	mGNAL	0.26254	0.127939
41	30	mGNAL	0.376651	0.241197
41	31	mGNAL	0.567824	0.431515
41	32	mGNAL	0.852204	0.71504
41	33	mGNAL	1.19919	1.06117
41	34	mGNAL	1.53518	1.39631
41	35	mGNAL	1.79132	1.6516
41	36	mGNAL	1.94647	1.80589
41	37	mGNAL	2.03431	1.89287
41	38	mGNAL	2.08526	1.94297
41	39	mGNAL	2.12449	1.98134
41	40	mGNAL	2.14936	2.00536
42	1	mGNAL	0.0952764	-0.00854134
42	2	mGNAL	0.0979798	-0.00686217
42	3	mGNAL	0.102556	-0.00331049
42	4	mGNAL	0.105797	-0.00109384
42	5	mGNAL	0.107507	-0.000407817
42	6	mGNAL	0.109471	0.000532511
42	7	mGNAL	0.111131	0.00116728
42	8	mGNAL	0.112403	0.00141568
42	9	mGNAL	0.113458	0.00144647
42	10	mGNAL	0.114497	0.00146151
42	11	mGNAL	0.115338	0.00127745
42	12	mGNAL	0.116455	0.00137066
42	13	mGNAL	0.116906	0.000797353
42	14	mGNAL	0.117503	0.000369725
42	15	mGNAL	0.118359	0.000201772
42	16	mGNAL	0.118928	-0.00025384
42	17	mGNAL	0.118924	-0.0012812
42	18	mGNAL	0.119519	-0.00171138
42	19	mGNAL	0.120335	-0.00191922
42	20	mGNAL	0.121658	-0.00162082
42	21	mGNAL	0.122749	-0.00155398
42	22	mGNAL	0.124757	-0.000569546
42	23	mGNAL	0.127068	0.000716541
42	24	mGNAL	0.130341	0.00296518
42	25	mGNAL	0.136733	0.00833365
42	26	mGNAL	0.147968	0.0185446
42	27	mGNAL	0.168459	0.038011
42	28	mGNAL	0.207143	0.0756707
42	29	mGNAL	0.279404	0.146908
42	30	mGNAL	0.409278	0.275758
42	31	mGNAL	0.622809	0.488263
42	32	mGNAL	0.927915	0.792345
42	33	mGNAL	1.28606	1.14947
42	34	mGNAL	1.61328	1.47566
42	35	mGNAL	1.85031	1.71167
42	36	mGNAL	1.98814	1.84848
42	37	mGNAL	2.06093	1.92024
42	38	mGNAL	2.11227	1.97055
42	39	mGNAL	2.14865	2.00591
42	40	mGNAL	2.17315	2.02939
43	1	mGNAL	0.0891972	-0.00594005
43	2	mGNAL	0.0910948	-0.00494261
43	3	mGNAL	0.0952226	-0.00171492
43	4	mGNAL	0.0974239	-0.000413833
43	5	mGNAL	0.0992455	0.000507707
43	6	mGNAL	0.100317	0.000678801
43	7	mGNAL	0.101319	0.000781299
43	8	mGNAL	0.102554	0.00111549
43	9	mGNAL	0.103086	0.000747294
43	10	mGNAL	0.103408	0.000169546
43	11	mGNAL	0.10417	3.16427e-05
43	12	mGNAL	0.105507	0.000467889
43	13	mGNAL	0.106043	0.000104256
43	14	mGNAL	0.107096	0.000256761
43	15	mGNAL	0.107543	-0.000196733
43	16	mGNAL	0.108183	-0.000456483
43	17	mGNAL	0.108749	-0.000790918
43	18	mGNAL	0.109853	-0.000586713
43	19	mGNAL	0.110394	-0.00094595
43	20	mGNAL	0.111108	-0.00113251
43	21	mGNAL	0.112237	-0.000903482
43	22	mGNAL	0.1131	-0.000940422
43	23	mGNAL	0.11441	-0.000530261
43	24	mGNAL	0.116424	0.000583675
43	25	mGNAL	0.119909	0.00316786
43	26	mGNAL	0.12684	0.00919921
43	27	mGNAL	0.139137	0.0205956
43	28	mGNAL	0.163042	0.0436006
43	29	mGNAL	0.206513	0.0861718
43	30	mGNAL	0.28687	0.165628
43	31	mGNAL	0.429427	0.307285
43	32	mGNAL	0.65994	0.536898
43	33	mGNAL	0.976526	0.852584
43	34	mGNAL	1.33393	1.20909
43	35	mGNAL	1.6468	1.52106
43	36	mGNAL	1.85652	1.72988
43	37	mGNAL	1.9811	1.85355
43	38	mGNAL	2.05133	1.92289
43	39	mGNAL	2.09338	1.96404
43	40	mGNAL	2.12032	1.99008
44	1	mGNAL	0.139339	-0.00428272
44	2	mGNAL	0.14137	-0.0030842
44	3	mGNAL	0.144258	-0.00102827
44	4	mGNAL	0.1464	0.000281622
44	5	mGNAL	0.147801	0.000849738
44	6	mGNAL	0.148559	0.000775405
44	7	mGNAL	0.149354	0.000738042
44	8	mGNAL	0.150352	0.000903857
44	9	mGNAL	0.150659	0.000378779
44	10	mGNAL	0.150833	-0.000279963
44	11	mGNAL	0.151781	-0.000163978
44	12	mGNAL	0.152834	5.64792e-05
44	13	mGNAL	0.153634	2.49127e-05
44	14	mGNAL	0.154684	0.000242181
44	15	mGNAL	0.154943	-0.000330939
44	16	mGNAL	0.155057	-0.00104903
44	17	mGNAL	0.155536	-0.0014024
44	18	mGNAL	0.156733	-0.00103802
44	19	mGNAL	0.157647	-0.000956483
44	20	mGNAL	0.158047	-0.00138829
44	21	mGNAL	0.159293	-0.000975061
44	22	mGNAL	0.160831	-0.000269631
44	23	mGNAL	0.162184	0.00025183
44	24	mGNAL	0.163954	0.00118949
44	25	mGNAL	0.166787	0.00318973
44	26	mGNAL	0.171402	0.00697227
44	27	mGNAL	0.180497	0.0152352
44	28	mGNAL	0.197871	0.0317772
44	29	mGNAL	0.230169	0.0632432
44	30	mGNAL	0.290478	0.12272
44	31	mGNAL	0.400409	0.231818
44	32	mGNAL	0.586516	0.417093
44	33	mGNAL	0.867975	0.69772
44	34	mGNAL	1.21512	1.04403
44	35	mGNAL	1.55438	1.38246
44	36	mGNAL	1.79567	1.62292
44	37	mGNAL	1.92615	1.75256
44	38	mGNAL	2.0103	1.83588
44	39	mGNAL	2.07626	1.90101
44	40	mGNAL	2.1191	1.94302
45	1	mGNAL	0.0617105	-0.00658008
45	2	mGNAL	0.0635701	-0.00562417
45	3	mGNAL	0.0671064	-0.00299161
45	4	mGNAL	0.0699816	-0.00102003
45	5	mGNAL	0.0718848	-2.05741e-05
45	6	mGNAL	0.0735044	0.000695365
45	7	mGNAL	0.0747741	0.00106135
45	8	mGNAL	0.0761245	0.00150803
45	9	mGNAL	0.0767988	0.00127866
45	10	mGNAL	0.0776477	0.00122386
45	11	mGNAL	0.0785294	0.00120191
45	12	mGNAL	0.0792825	0.00105134
45	13	mGNAL	0.0793383	0.000203468
45	14	mGNAL	0.0804439	0.000405346
45	15	mGNAL	0.080866	-7.62915e-05
45	16	mGNAL	0.081466	-0.000379957
45	17	mGNAL	0.0819057	-0.00084393
45	18	mGNAL	0.0822691	-0.00138427
45	19	mGNAL	0.0828931	-0.00166392
45	20	mGNAL	0.0839894	-0.00147129
45	21	mGNAL	0.0850725	-0.00129191
45	22	mGNAL	0.0863232	-0.000944882
45	23	mGNAL	0.0877031	-0.000468659
45	24	mGNAL	0.0894628	0.000387306
45	25	mGNAL	0.0935199	0.0035407
45	26	mGNAL	0.0998686	0.00898572
45	27	mGNAL	0.111453	0.0196662
45	28	mGNAL	0.133231	0.0405406
45	29	mGNAL	0.174343	0.080749
45	30	mGNAL	0.251812	0.157315
45	31	mGNAL	0.388412	0.293011
45	32	mGNAL	0.610604	0.514299
45	33	mGNAL	0.924138	0.826929
45	34	mGNAL	1.28233	1.18422
45	35	mGNAL	1.60313	1.50411
45	36	mGNAL	1.82547	1.72555
45	37	mGNAL	1.95653	1.85571
45	38	mGNAL	2.03196	1.93023
45	39	mGNAL	2.07823	1.9756
45	40	mGNAL	2.10816	2.00463
46	1	mGNAL	0.259869	-0.0134139
46	2	mGNAL	0.263865	-0.010418
46	3	mGNAL	0.270753	-0.00452879
46	4	mGNAL	0.274188	-0.00209344
46	5	mGNAL	0.276426	-0.000854828
46	6	mGNAL	0.279292	0.00101148
46	7	mGNAL	0.280753	0.00147349
46	8	mGNAL	0.281854	0.00157517
46	9	mGNAL	0.283507	0.00222817
46	10	mGNAL	0.284234	0.00195618
46	11	mGNAL	0.284872	0.00159447
46	12	mGNAL	0.285175	0.000898157
46	13	mGNAL	0.285967	0.000690935
46	14	mGNAL	0.287062	0.000786951
46	15	mGNAL	0.287993	0.000718041
46	16	mGNAL	0.288342	6.82248e-05
46	17	mGNAL	0.288837	-0.000435829
46	18	mGNAL	0.289631	-0.000641322
46	19	mGNAL	0.290004	-0.00126849
46	20	mGNAL	0.290853	-0.00141831
46	21	mGNAL	0.291822	-0.00144872
46	22	mGNAL	0.292606	-0.00166384
46	23	mGNAL	0.293993	-0.00127659
46	24	mGNAL	0.296726	0.000457002
46	25	mGNAL	0.29944	0.00217188
46	26	mGNAL	0.304904	0.00663614
46	27	mGNAL	0.314428	0.0151608
46	28	mGNAL	0.333539	0.0332725
46	29	mGNAL	0.368322	0.0670566
46	30	mGNAL	0.435306	0.133041
46	31	mGNAL	0.555043	0.251779
46	32	mGNAL	0.750594	0.44633
46	33	mGNAL	1.03401	0.728747
46	34	mGNAL	1.36874	1.06247
46	35	mGNAL	1.67529	1.36803
46	36	mGNAL	1.89885	1.59059
46	37	mGNAL	2.0338	1.72454
46	38	mGNAL	2.11285	1.80259
46	39	mGNAL	2.16178	1.85052
46	40	mGNAL	2.19206	1.87981
47	1	mGNAL	0.0701709	-0.00428209
47	2	mGNAL	0.0711426	-0.00425209
47	3	mGNAL	0.0742041	-0.00213223
47	4	mGNAL	0.0762896	-0.000988441
47	5	mGNAL	0.0781987	-2.10206e-05
47	6	mGNAL	0.0799713	0.000809913
47	7	mGNAL	0.0811332	0.00103018
47	8	mGNAL	0.0824037	0.00135894
47	9	mGNAL	0.0834194	0.00143297
47	10	mGNAL	0.0839967	0.00106863
47	11	mGNAL	0.0849841	0.00111433
47	12	mGNAL	0.085286	0.000474538
47	13	mGNAL	0.0860902	0.000337059
47	14	mGNAL	0.0871008	0.000405955
47	15	mGNAL	0.0877333	9.68372e-05
47	16	mGNAL	0.0883553	-0.000222815
47	17	mGNAL	0.0885943	-0.000925584
47	18	mGNAL	0.0886947	-0.00176678
47	19	mGNAL	0.090123	-0.00128021
47	20	mGNAL	0.0906408	-0.00170404
47	21	mGNAL	0.0909735	-0.00231301
47	22	mGNAL	0.0925102	-0.001718
47	23	mGNAL	0.0941725	-0.000997439
47	24	mGNAL	0.0959395	-0.000172042
47	25	mGNAL	0.0985655	0.00151221
47	26	mGNAL	0.102595	0.00460005
47	27	mGNAL	0.110238	0.0113012
47	28	mGNAL	0.126513	0.0266349
47	29	mGNAL	0.156473	0.0556525
47	30	mGNAL	0.211866	0.110105
47	31	mGNAL	0.313029	0.210326
47	32	mGNAL	0.483928	0.380283
47	33	mGNAL	0.741918	0.637331
47	34	mGNAL	1.06586	0.960336
47	35	mGNAL	1.3878	1.28133
47	36	mGNAL	1.63879	1.53138
47	37	mGNAL	1.78957	1.68122
47	38	mGNAL	1.87652	1.76722
47	39	mGNAL	1.92853	1.81829
47	40	mGNAL	1.95897	1.84779
48	1	mGNAL	0.0623152	-0.0101929
48	2	mGNAL	0.0641065	-0.00942551
48	3	mGNAL	0.069001	-0.00555491
48	4	mGNAL	0.073648	-0.00193193
48	5	mGNAL	0.0767498	0.000145944
48	6	mGNAL	0.078515	0.00088727
48	7	mGNAL	0.0798648	0.00121314
48	8	mGNAL	0.0816315	0.00195585
48	9	mGNAL	0.0825709	0.00187138
48	10	mGNAL	0.0834959	0.00177244
48	11	mGNAL	0.0843927	0.00164532
48	12	mGNAL	0.0852508	0.0014794
48	13	mGNAL	0.0858336	0.0010383
48	14	mGNAL	0.0866604	0.000841138
48	15	mGNAL	0.087316	0.000472864
48	16	mGNAL	0.0876293	-0.000237765
48	17	mGNAL	0.0886144	-0.000276649
48	18	mGNAL	0.0890298	-0.000885197
48	19	mGNAL	0.0898088	-0.00113005
48	20	mGNAL	0.0908553	-0.00110752
48	21	mGNAL	0.0916477	-0.00133903
48	22	mGNAL	0.0921272	-0.00188351
48	23	mGNAL	0.0933556	-0.001679
48	24	mGNAL	0.0959698	-8.87357e-05
48	25	mGNAL	0.0998737	0.00279124
48	26	mGNAL	0.106984	0.00887732
48	27	mGNAL	0.120349	0.0212189
48	28	mGNAL	0.145703	0.0455483
48	29	mGNAL	0.192232	0.0910538
48	30	mGNAL	0.278838	0.176635
48	31	mGNAL	0.429405	0.326178
48	32	mGNAL	0.665583	0.561333
48	33	mGNAL	0.982423	0.877149
48	34	mGNAL	1.32501	1.21871
48	35	mGNAL	1.61366	1.50634
48	36	mGNAL	1.80177	1.69343
48	37	mGNAL	1.91318	1.80381
48	38	mGNAL	1.97557	1.86517
48	39	mGNAL	2.01772	1.90631
48	40	mGNAL	2.0491	1.93666
49	1	mFAM110C	0.127551	-0.00698076
49	2	mFAM110C	0.129628	-0.00595878
49	3	mFAM110C	0.133004	-0.00363769
49	4	mFAM110C	0.136569	-0.0011279
49	5	mFAM110C	0.13867	-8.17112e-05
49	6	mFAM110C	0.139894	8.63712e-05
49	7	mFAM110C	0.141976	0.00111382
49	8	mFAM110C	0.14326	0.00134233
49	9	mFAM110C	0.144385	0.0014121
49	10	mFAM110C	0.145228	0.00119967
49	11	mFAM110C	0.146026	0.000942504
49	12	mFAM110C	0.147471	0.00133221
49	13	mFAM110C	0.148255	0.00106172
49	14	mFAM110C	0.148562	0.000312922
49	15	mFAM110C	0.149389	8.49312e-05
49	16	mFAM110C	0.150413	5.40235e-05
49	17	mFAM110C	0.150612	-0.000802736
49	18	mFAM110C	0.151634	-0.000835447
49	19	mFAM110C	0.15247	-0.00105456
49	20	mFAM110C	0.153513	-0.00106728
49	21	mFAM110C	0.154404	-0.00123078
49	22	mFAM110C	0.155976	-0.000714908
49	23	mFAM110C	0.159356	0.00161042
49	24	mFAM110C	0.165011	0.00621012
49	25	mFAM110C	0.175132	0.015276
49	26	mFAM110C	0.19586	0.0349486
49	27	mFAM110C	0.233208	0.0712417
49	28	mFAM110C	0.300828	0.137806
49	29	mFAM110C	0.420079	0.256002
49	30	mFAM110C	0.610318	0.445186
49	31	mFAM110C	0.87368	0.707493
49	32	mFAM110C	1.17429	1.00705
49	33	mFAM110C	1.45587	1.28758
49	34	mFAM110C	1.6746	1.50524
49	35	mFAM110C	1.82844	1.65803
49	36	mFAM110C	1.92563	1.75417
49	37	mFAM110C	1.991	1.81848
49	38	mFAM110C	2.03171	1.85813
49	39	mFAM110C	2.06056	1.88593
49	40	mFAM110C	2.08493	1.90925
50	1	mFAM110C	0.137989	-0.00356708
50	2	mFAM110C	0.138918	-0.00341785
50	3	mFAM110C	0.141345	-0.00177013
50	4	mFAM110C	0.143493	-0.000401984
50	5	mFAM110C	0.145294	0.000619201
[truncated: 13,395 more rows]

## Sheet: Results
Block Type	384-Well Block
Calibration Background is expired	Yes
Calibration Background performed on	10-12-2018 11:47:46 PDT
Calibration FAM is expired	Yes
Calibration FAM performed on	10-23-2018 10:23:19 PDT
Calibration MELTDOCTOR is expired	Yes
Calibration MELTDOCTOR performed on	09-26-2017 21:22:46 PDT
Calibration NED is expired	Yes
Calibration NED performed on	10-23-2018 10:33:14 PDT
Calibration ROI is expired	Yes
Calibration ROI performed on	10-12-2018 09:37:21 PDT
Calibration ROX is expired	Yes
Calibration ROX performed on	10-23-2018 10:07:21 PDT
Calibration SYBR is expired	Yes
Calibration SYBR performed on	10-23-2018 09:57:53 PDT
Calibration TAMRA is expired	Yes
Calibration TAMRA performed on	10-23-2018 10:45:25 PDT
Calibration Uniformity is expired	Yes
Calibration Uniformity performed on	10-12-2018 10:06:59 PDT
Calibration VIC is expired	Yes
Calibration VIC performed on	10-23-2018 10:54:25 PDT
Chemistry	SYBR_GREEN
Date Created	02-07-2021 22:20:49 PST
Experiment File Name	D:\NZZ\2021-02-07 205722.eds
Experiment Name	2021-02-07 205722
Experiment Run End Time	02-07-2021 15:32:51 PST
Experiment Type	Comparative Cт (ΔΔCт)
Instrument Name	285880860
Instrument Serial Number	285880860
Instrument Type	QuantStudio 12K Flex
Passive Reference	ROX
Quantification Cycle Method	Ct
Signal Smoothing On	true
Stage/ Cycle where Analysis is performed	Stage 2, Step 2
Well	Well Position	Omit	Sample Name	Target Name	Task	Reporter	Quencher	RQ	RQ Min	RQ Max	CT	Ct Mean	Ct SE	Quantity	Delta Ct Mean	Delta Ct SE	Delta Delta Ct	Automatic Ct Threshold	Ct Threshold	Automatic Baseline	Baseline Start	Baseline End	Efficiency	Comments	Amp Score	Cq Conf	Tm1	Tm2	Tm3	MTP	EXPFAIL	HIGHSD	NOAMP	THOLDFAIL	OUTLIERRG
4	A4	false	vec-4	mCYC	UNKNOWN	SYBR	None				18.067	17.9716	0.0494097					true	0.219815	true	3	12			1.36709	0.972208	85.1726			N	N	N	N	N	N
5	A5	false	vec-4	mCYC	UNKNOWN	SYBR	None				17.947	17.9716	0.0494097					true	0.219815	true	3	12			1.37337	0.97218	85.1726			N	N	N	N	N	N
6	A6	false	vec-4	mCYC	UNKNOWN	SYBR	None				17.901	17.9716	0.0494097					true	0.219815	true	3	12			1.37608	0.98172	85.1726			N	N	N	N	N	N
7	A7	false	vec-6	mCYC	UNKNOWN	SYBR	None				17.843	17.9681	0.0921494					true	0.219815	true	3	12			1.36887	0.977449	85.1726			N	N	N	N	N	N
8	A8	false	vec-6	mCYC	UNKNOWN	SYBR	None				18.148	17.9681	0.0921494					true	0.219815	true	3	12			1.36959	0.970866	85.1726			N	N	N	N	N	N
9	A9	false	vec-6	mCYC	UNKNOWN	SYBR	None				17.914	17.9681	0.0921494					true	0.219815	true	3	12			1.37561	0.981928	85.1726			N	N	N	N	N	N
10	A10	false	vec-7	mCYC	UNKNOWN	SYBR	None				17.979	17.9207	0.0319927					true	0.219815	true	3	12			1.37908	0.981277	85.3009			N	N	N	N	N	N
11	A11	false	vec-7	mCYC	UNKNOWN	SYBR	None				17.914	17.9207	0.0319927					true	0.219815	true	3	12			1.37579	0.96954	85.3009			N	N	N	N	N	N
12	A12	false	vec-7	mCYC	UNKNOWN	SYBR	None				17.869	17.9207	0.0319927					true	0.219815	true	3	12			1.37494	0.974591	85.3009			N	N	N	N	N	N
19	A19	false	HBx-5	mCYC	UNKNOWN	SYBR	None				17.823	17.8211	0.011545					true	0.219815	true	3	12			1.37741	0.97359	85.3009			N	N	N	N	N	N
20	A20	false	HBx-5	mCYC	UNKNOWN	SYBR	None				17.84	17.8211	0.011545					true	0.219815	true	3	12			1.37538	0.975352	85.3009			N	N	N	N	N	N
21	A21	false	HBx-5	mCYC	UNKNOWN	SYBR	None				17.8	17.8211	0.011545					true	0.219815	true	3	12			1.37459	0.971179	85.3009			N	N	N	N	N	N
28	B4	false	vec-4	mGNAL	UNKNOWN	SYBR	None	0.567929	0.369745	0.872341	29.279	29.707	0.21747		11.7355	0.223012	0.816217	true	0.143993	true	3	24			1.31168	0.838359	82.991			N	N	N	N	N	N
29	B5	false	vec-4	mGNAL	UNKNOWN	SYBR	None	0.567929	0.369745	0.872341	29.854	29.707	0.21747		11.7355	0.223012	0.816217	true	0.143993	true	3	25			1.38092	0.96818	82.8627			N	N	N	N	N	N
30	B6	false	vec-4	mGNAL	UNKNOWN	SYBR	None	0.567929	0.369745	0.872341	29.988	29.707	0.21747		11.7355	0.223012	0.816217	true	0.143993	true	3	25			1.36344	0.804264	82.991			N	N	N	N	N	N
31	B7	false	vec-6	mGNAL	UNKNOWN	SYBR	None	0.545426	0.440865	0.674786	29.64	29.7619	0.0611437		11.7938	0.11059	0.874545	true	0.143993	true	3	25			1.37979	0.957893	82.8627			N	N	N	N	N	N
32	B8	false	vec-6	mGNAL	UNKNOWN	SYBR	None	0.545426	0.440865	0.674786	29.825	29.7619	0.0611437		11.7938	0.11059	0.874545	true	0.143993	true	3	25			1.38377	0.978167	82.8627			N	N	N	N	N	N
33	B9	false	vec-6	mGNAL	UNKNOWN	SYBR	None	0.545426	0.440865	0.674786	29.821	29.7619	0.0611437		11.7938	0.11059	0.874545	true	0.143993	true	3	25			1.37944	0.97357	82.8627			N	N	N	N	N	N
34	B10	false	vec-7	mGNAL	UNKNOWN	SYBR	None	0.608796	0.299063	1.23931	28.89	29.5559	0.367973		11.6352	0.369361	0.715969	true	0.143993	true	3	24			1.3693	0.975793	82.991			N	N	Y	N	N	N
35	B11	false	vec-7	mGNAL	UNKNOWN	SYBR	None	0.608796	0.299063	1.23931	30.16	29.5559	0.367973		11.6352	0.369361	0.715969	true	0.143993	true	3	25			1.39041	0.976096	82.991			N	N	Y	N	N	N
36	B12	false	vec-7	mGNAL	UNKNOWN	SYBR	None	0.608796	0.299063	1.23931	29.619	29.5559	0.367973		11.6352	0.369361	0.715969	true	0.143993	true	3	25			1.39278	0.977458	82.991			N	N	Y	N	N	N
43	B19	false	HBx-5	mGNAL	UNKNOWN	SYBR	None	0.425931	0.322864	0.561899	29.79	29.9717	0.143495		12.1506	0.143958	1.23131	true	0.143993	true	3	25			1.38846	0.973303	82.991			N	N	N	N	N	N
44	B20	false	HBx-5	mGNAL	UNKNOWN	SYBR	None	0.425931	0.322864	0.561899	30.255	29.9717	0.143495		12.1506	0.143958	1.23131	true	0.143993	true	3	25			1.39073	0.97389	82.991			N	N	N	N	N	N
45	B21	false	HBx-5	mGNAL	UNKNOWN	SYBR	None	0.425931	0.322864	0.561899	29.871	29.9717	0.143495		12.1506	0.143958	1.23131	true	0.143993	true	3	25			1.39175	0.972801	82.991			N	N	N	N	N	N
52	C4	false	vec-4	mFAM110C	UNKNOWN	SYBR	None	0.563892	0.455236	0.698483	28.348	28.5446	0.0996457		10.573	0.111223	0.826509	true	0.217537	true	3	23			1.36451	0.966873	90.3057			N	N	N	N	N	N
53	C5	false	vec-4	mFAM110C	UNKNOWN	SYBR	None	0.563892	0.455236	0.698483	28.67	28.5446	0.0996457		10.573	0.111223	0.826509	true	0.217537	true	3	23			1.37323	0.974795	90.3057			N	N	N	N	N	N
54	C6	false	vec-4	mFAM110C	UNKNOWN	SYBR	None	0.563892	0.455236	0.698483	28.616	28.5446	0.0996457		10.573	0.111223	0.826509	true	0.217537	true	3	23			1.36972	0.971021	90.3057			N	N	N	N	N	N
55	C7	false	vec-6	mFAM110C	UNKNOWN	SYBR	None	0.604802	0.424186	0.862325	28.195	28.4401	0.159638		10.472	0.184325	0.725465	true	0.217537	true	3	23			1.37429	0.968839	90.3057			N	N	N	N	N	N
56	C8	false	vec-6	mFAM110C	UNKNOWN	SYBR	None	0.604802	0.424186	0.862325	28.74	28.4401	0.159638		10.472	0.184325	0.725465	true	0.217537	true	3	23			1.36625	0.967114	90.3057			N	N	N	N	N	N
57	C9	false	vec-6	mFAM110C	UNKNOWN	SYBR	None	0.604802	0.424186	0.862325	28.385	28.4401	0.159638		10.472	0.184325	0.725465	true	0.217537	true	3	23			1.36871	0.94874	90.3057			N	N	N	N	N	N
58	C10	false	vec-7	mFAM110C	UNKNOWN	SYBR	None	0.558753	0.502038	0.621876	28.595	28.507	0.0454931		10.5863	0.0556162	0.839717	true	0.217537	true	3	23			1.36775	0.965871	90.3057			N	N	N	N	N	N
59	C11	false	vec-7	mFAM110C	UNKNOWN	SYBR	None	0.558753	0.502038	0.621876	28.444	28.507	0.0454931		10.5863	0.0556162	0.839717	true	0.217537	true	3	23			1.37127	0.973005	90.3057			N	N	N	N	N	N
60	C12	false	vec-7	mFAM110C	UNKNOWN	SYBR	None	0.558753	0.502038	0.621876	28.481	28.507	0.0454931		10.5863	0.0556162	0.839717	true	0.217537	true	3	23			1.37229	0.974136	90.434			N	N	N	N	N	N
67	C19	false	HBx-5	mFAM110C	UNKNOWN	SYBR	None	0.779645	0.731515	0.830941	27.919	27.9268	0.0310325		10.1056	0.0331104	0.359111	true	0.217537	true	3	22			1.38975	0.973554	90.434			N	N	N	N	N	N
68	C20	false	HBx-5	mFAM110C	UNKNOWN	SYBR	None	0.779645	0.731515	0.830941	27.877	27.9268	0.0310325		10.1056	0.0331104	0.359111	true	0.217537	true	3	22			1.38026	0.966593	90.434			N	N	N	N	N	N
69	C21	false	HBx-5	mFAM110C	UNKNOWN	SYBR	None	0.779645	0.731515	0.830941	27.984	27.9268	0.0310325		10.1056	0.0331104	0.359111	true	0.217537	true	3	22			1.38106	0.972161	90.434			N	N	N	N	N	N
76	D4	false	vec-4	mRGS5	UNKNOWN	SYBR	None	0.804529	0.644603	1.00413	23.707	23.9123	0.104021		5.9407	0.11516	0.313784	true	0.183269	true	3	18			1.36874	0.968818	86.0709			N	N	N	N	N	N
77	D5	false	vec-4	mRGS5	UNKNOWN	SYBR	None	0.804529	0.644603	1.00413	23.985	23.9123	0.104021		5.9407	0.11516	0.313784	true	0.183269	true	3	19			1.3755	0.968123	86.0709			N	N	N	N	N	N
78	D6	false	vec-4	mRGS5	UNKNOWN	SYBR	None	0.804529	0.644603	1.00413	24.045	23.9123	0.104021		5.9407	0.11516	0.313784	true	0.183269	true	3	19			1.37216	0.976563	86.0709			N	N	N	N	N	N
79	D7	false	vec-6	mRGS5	UNKNOWN	SYBR	None	0.726994	0.599575	0.881493	24.068	24.055	0.0391721		6.0869	0.10013	0.459984	true	0.183269	true	3	19			1.36913	0.9458	86.0709			N	N	N	N	N	N
80	D8	false	vec-6	mRGS5	UNKNOWN	SYBR	None	0.726994	0.599575	0.881493	24.116	24.055	0.0391721		6.0869	0.10013	0.459984	true	0.183269	true	3	19			1.3654	0.960433	86.0709			N	N	N	N	N	N
81	D9	false	vec-6	mRGS5	UNKNOWN	SYBR	None	0.726994	0.599575	0.881493	23.982	24.055	0.0391721		6.0869	0.10013	0.459984	true	0.183269	true	3	19			1.37805	0.976979	86.0709			N	N	N	N	N	N
82	D10	false	vec-7	mRGS5	UNKNOWN	SYBR	None	0.754027	0.573464	0.991444	24.227	23.955	0.138593		6.03422	0.142238	0.407311	true	0.183269	true	3	19			1.36035	0.95781	86.1992			N	N	N	N	N	N
83	D11	false	vec-7	mRGS5	UNKNOWN	SYBR	None	0.754027	0.573464	0.991444	23.866	23.955	0.138593		6.03422	0.142238	0.407311	true	0.183269	true	3	19			1.37504	0.975049	86.1992			N	N	N	N	N	N
84	D12	false	vec-7	mRGS5	UNKNOWN	SYBR	None	0.754027	0.573464	0.991444	23.772	23.955	0.138593		6.03422	0.142238	0.407311	true	0.183269	true	3	18			1.37625	0.970794	86.1992			N	N	N	N	N	N
91	D19	false	HBx-5	mRGS5	UNKNOWN	SYBR	None	0.659957	0.621692	0.700577	24.069	24.0476	0.0288098		6.22647	0.0310369	0.599557	true	0.183269	true	3	19			1.37744	0.967246	86.1992			N	N	N	N	N	N
92	D20	false	HBx-5	mRGS5	UNKNOWN	SYBR	None	0.659957	0.621692	0.700577	23.991	24.0476	0.0288098		6.22647	0.0310369	0.599557	true	0.183269	true	3	19			1.38231	0.970855	86.1992			N	N	N	N	N	N
93	D21	false	HBx-5	mRGS5	UNKNOWN	SYBR	None	0.659957	0.621692	0.700577	24.083	24.0476	0.0288098		6.22647	0.0310369	0.599557	true	0.183269	true	3	19			1.38098	0.967995	86.1992			N	N	N	N	N	N
124	F4	false	vec-4	HBx	UNKNOWN	SYBR	None				Undetermined	36.3696						true	0.189219	true	3	39			0	0	61.1752			N	Y	N	Y	N	N
125	F5	false	vec-4	HBx	UNKNOWN	SYBR	None				Undetermined	36.3696						true	0.189219	true	3	39			0	0	61.3036			N	Y	N	Y	N	N
126	F6	false	vec-4	HBx	UNKNOWN	SYBR	None				36.37	36.3696			18.398			true	0.189219	true	3	31			1.28711	0.954486	81.1944			N	N	N	N	N	N
127	F7	false	vec-6	HBx	UNKNOWN	SYBR	None				34.261	34.4765	0.475029		16.5084	0.483884		true	0.189219	true	3	29			1.35805	0.946515	81.0661			N	N	Y	N	N	N
128	F8	false	vec-6	HBx	UNKNOWN	SYBR	None				35.386	34.4765	0.475029		16.5084	0.483884		true	0.189219	true	3	30			1.35667	0.964171	81.0661			N	N	Y	N	N	N
129	F9	false	vec-6	HBx	UNKNOWN	SYBR	None				33.783	34.4765	0.475029		16.5084	0.483884		true	0.189219	true	3	28			1.36787	0.970529	81.0661			N	N	Y	N	N	N
130	F10	false	vec-7	HBx	UNKNOWN	SYBR	None				30.49	30.485	0.0291668		12.5643	0.0432925		true	0.189219	true	3	25			1.35569	0.967835	81.0661			N	N	N	N	N	N
131	F11	false	vec-7	HBx	UNKNOWN	SYBR	None				30.432	30.485	0.0291668		12.5643	0.0432925		true	0.189219	true	3	25			1.36223	0.967284	81.1944			N	N	N	N	N	N
132	F12	false	vec-7	HBx	UNKNOWN	SYBR	None				30.533	30.485	0.0291668		12.5643	0.0432925		true	0.189219	true	3	25			1.37403	0.959896	81.1944			N	N	N	N	N	N
139	F19	false	HBx-5	HBx	UNKNOWN	SYBR	None				19.853	19.8199	0.0266449		1.99882	0.0290386		true	0.189219	true	3	15			1.37357	0.964153	81.4511			N	N	N	N	N	N
140	F20	false	HBx-5	HBx	UNKNOWN	SYBR	None				19.84	19.8199	0.0266449		1.99882	0.0290386		true	0.189219	true	3	15			1.37477	0.951387	81.4511			N	N	N	N	N	N
141	F21	false	HBx-5	HBx	UNKNOWN	SYBR	None				19.767	19.8199	0.0266449		1.99882	0.0290386		true	0.189219	true	3	15			1.38019	0.960658	81.4511			N	N	N	N	N	N
148	G4	false	vec-4	mCPEB3	UNKNOWN	SYBR	None	0.71833	0.637582	0.809305	26.162	26.0887	0.0373907		8.11715	0.0619628	0.477281	true	0.213694	true	3	20			1.3644	0.974208	93.6422			N	N	N	N	N	N
149	G5	false	vec-4	mCPEB3	UNKNOWN	SYBR	None	0.71833	0.637582	0.809305	26.062	26.0887	0.0373907		8.11715	0.0619628	0.477281	true	0.213694	true	3	20			1.36793	0.96696	93.6422			N	N	N	N	N	N
150	G6	false	vec-4	mCPEB3	UNKNOWN	SYBR	None	0.71833	0.637582	0.809305	26.041	26.0887	0.0373907		8.11715	0.0619628	0.477281	true	0.213694	true	3	20			1.37567	0.969996	93.6422			N	N	N	N	N	N
151	G7	false	vec-6	mCPEB3	UNKNOWN	SYBR	None	0.702497	0.583186	0.846217	26.13	26.1174	0.0293782		8.14931	0.0967191	0.509436	true	0.213694	true	3	20			1.37483	0.959011	93.6422			N	N	N	N	N	N
152	G8	false	vec-6	mCPEB3	UNKNOWN	SYBR	None	0.702497	0.583186	0.846217	26.16	26.1174	0.0293782		8.14931	0.0967191	0.509436	true	0.213694	true	3	20			1.37321	0.961573	93.6422			N	N	N	N	N	N
153	G9	false	vec-6	mCPEB3	UNKNOWN	SYBR	None	0.702497	0.583186	0.846217	26.061	26.1174	0.0293782		8.14931	0.0967191	0.509436	true	0.213694	true	3	20			1.37624	0.970414	93.6422			N	N	N	N	N	N
154	G10	false	vec-7	mCPEB3	UNKNOWN	SYBR	None	0.628356	0.52055	0.75849	26.411	26.2309	0.0924231		8.31022	0.0978037	0.670345	true	0.213694	true	3	21			1.36327	0.961237	93.6422			N	N	N	N	N	N
155	G11	false	vec-7	mCPEB3	UNKNOWN	SYBR	None	0.628356	0.52055	0.75849	26.104	26.2309	0.0924231		8.31022	0.0978037	0.670345	true	0.213694	true	3	20			1.37024	0.962087	93.6422			N	N	N	N	N	N
156	G12	false	vec-7	mCPEB3	UNKNOWN	SYBR	None	0.628356	0.52055	0.75849	26.177	26.2309	0.0924231		8.31022	0.0978037	0.670345	true	0.213694	true	3	20			1.37131	0.971927	93.6422			N	N	N	N	N	N
163	G19	false	HBx-5	mCPEB3	UNKNOWN	SYBR	None	0.705645	0.689631	0.722031	25.965	25.964	0.00299948		8.14286	0.0119282	0.502986	true	0.213694	true	3	20			1.37373	0.964961	93.6422			N	N	N	N	N	N
164	G20	false	HBx-5	mCPEB3	UNKNOWN	SYBR	None	0.705645	0.689631	0.722031	25.968	25.964	0.00299948		8.14286	0.0119282	0.502986	true	0.213694	true	3	20			1.37495	0.965535	93.6422			N	N	N	N	N	N
165	G21	false	HBx-5	mCPEB3	UNKNOWN	SYBR	None	0.705645	0.689631	0.722031	25.958	25.964	0.00299948		8.14286	0.0119282	0.502986	true	0.213694	true	3	20			1.38245	0.964258	93.6422			N	N	N	N	N	N
172	H4	false	vec-4	mARG1	UNKNOWN	SYBR	None	0.776203	0.702307	0.857874	17.22	17.1993	0.016158		-0.77224	0.0519846	0.365494	true	0.117069	true	3	13			1.3087	0.983072	84.1459			N	N	N	N	N	N
173	H5	false	vec-4	mARG1	UNKNOWN	SYBR	None	0.776203	0.702307	0.857874	17.211	17.1993	0.016158		-0.77224	0.0519846	0.365494	true	0.117069	true	3	13			1.31018	0.974621	84.1459			N	N	N	N	N	N
174	H6	false	vec-4	mARG1	UNKNOWN	SYBR	None	0.776203	0.702307	0.857874	17.167	17.1993	0.016158		-0.77224	0.0519846	0.365494	true	0.117069	true	3	13			1.31631	0.952335	84.1459			N	N	N	N	N	N
175	H7	false	vec-6	mARG1	UNKNOWN	SYBR	None	0.894511	0.74831	1.06928	16.99	16.9912	0.0103714		-0.976906	0.0927312	0.160829	true	0.117069	true	3	13			1.328	0.957886	84.1459			N	N	N	N	N	N
176	H8	false	vec-6	mARG1	UNKNOWN	SYBR	None	0.894511	0.74831	1.06928	17.01	16.9912	0.0103714		-0.976906	0.0927312	0.160829	true	0.117069	true	3	12			1.3187	0.973926	84.1459			N	N	N	N	N	N
177	H9	false	vec-6	mARG1	UNKNOWN	SYBR	None	0.894511	0.74831	1.06928	16.974	16.9912	0.0103714		-0.976906	0.0927312	0.160829	true	0.117069	true	3	12			1.32121	0.972128	84.1459			N	N	N	N	N	N
178	H10	false	vec-7	mARG1	UNKNOWN	SYBR	None	0.920007	0.799644	1.05849	17.013	16.9033	0.0654578		-1.01745	0.0728578	0.120284	true	0.117069	true	3	13			1.32116	0.968847	84.1459			N	N	N	N	N	N
179	H11	false	vec-7	mARG1	UNKNOWN	SYBR	None	0.920007	0.799644	1.05849	16.786	16.9033	0.0654578		-1.01745	0.0728578	0.120284	true	0.117069	true	3	12			1.32399	0.970113	84.1459			N	N	N	N	N	N
180	H12	false	vec-7	mARG1	UNKNOWN	SYBR	None	0.920007	0.799644	1.05849	16.911	16.9033	0.0654578		-1.01745	0.0728578	0.120284	true	0.117069	true	3	12			1.3205	0.952075	84.1459			N	N	N	N	N	N
187	H19	false	HBx-5	mARG1	UNKNOWN	SYBR	None	0.91662	0.847533	0.991339	16.803	16.809	0.0390482		-1.01213	0.0407191	0.125605	true	0.117069	true	3	12			1.32834	0.973911	84.1459			N	N	N	N	N	N
188	H20	false	HBx-5	mARG1	UNKNOWN	SYBR	None	0.91662	0.847533	0.991339	16.744	16.809	0.0390482		-1.01213	0.0407191	0.125605	true	0.117069	true	3	12			1.32931	0.96924	84.1459			N	N	N	N	N	N
189	H21	false	HBx-5	mARG1	UNKNOWN	SYBR	None	0.91662	0.847533	0.991339	16.879	16.809	0.0390482		-1.01213	0.0407191	0.125605	true	0.117069	true	3	12			1.33141	0.964259	84.1459			N	N	N	N	N	N
196	I4	false	vec-4	mALDOB	UNKNOWN	SYBR	None	0.832326	0.751256	0.922145	17.262	17.2231	0.0198545		-0.748442	0.0532496	0.264779	true	0.217328	true	3	12			1.37232	0.959574	84.0176			N	N	N	N	N	N
197	I5	false	vec-4	mALDOB	UNKNOWN	SYBR	None	0.832326	0.751256	0.922145	17.197	17.2231	0.0198545		-0.748442	0.0532496	0.264779	true	0.217328	true	3	12			1.37482	0.970188	84.0176			N	N	N	N	N	N
198	I6	false	vec-4	mALDOB	UNKNOWN	SYBR	None	0.832326	0.751256	0.922145	17.21	17.2231	0.0198545		-0.748442	0.0532496	0.264779	true	0.217328	true	3	12			1.37727	0.955164	84.0176			N	N	N	N	N	N
199	I7	false	vec-6	mALDOB	UNKNOWN	SYBR	None	0.861804	0.709804	1.04635	17.159	17.1694	0.0409212		-0.798653	0.100827	0.214568	true	0.217328	true	3	12			1.37267	0.947882	84.0176			N	N	N	N	N	N
200	I8	false	vec-6	mALDOB	UNKNOWN	SYBR	None	0.861804	0.709804	1.04635	17.245	17.1694	0.0409212		-0.798653	0.100827	0.214568	true	0.217328	true	3	12			1.37258	0.965094	84.0176			N	N	N	N	N	N
201	I9	false	vec-6	mALDOB	UNKNOWN	SYBR	None	0.861804	0.709804	1.04635	17.104	17.1694	0.0409212		-0.798653	0.100827	0.214568	true	0.217328	true	3	12			1.37358	0.960876	84.0176			N	N	N	N	N	N
202	I10	false	vec-7	mALDOB	UNKNOWN	SYBR	None	0.859945	0.7481	0.988512	17.207	17.1252	0.0649477		-0.795538	0.0723998	0.217683	true	0.217328	true	3	12			1.36833	0.9563	84.0176			N	N	N	N	N	N
203	I11	false	vec-7	mALDOB	UNKNOWN	SYBR	None	0.859945	0.7481	0.988512	16.997	17.1252	0.0649477		-0.795538	0.0723998	0.217683	true	0.217328	true	3	12			1.37224	0.967603	84.0176			N	N	N	N	N	N
204	I12	false	vec-7	mALDOB	UNKNOWN	SYBR	None	0.859945	0.7481	0.988512	17.172	17.1252	0.0649477		-0.795538	0.0723998	0.217683	true	0.217328	true	3	12			1.37194	0.944008	84.0176			N	N	N	N	N	N
211	I19	false	HBx-5	mALDOB	UNKNOWN	SYBR	None	0.842483	0.803573	0.883277	17.092	17.0552	0.0216892		-0.76594	0.0245704	0.247281	true	0.217328	true	3	12			1.37817	0.964379	84.0176			N	N	N	N	N	N
212	I20	false	HBx-5	mALDOB	UNKNOWN	SYBR	None	0.842483	0.803573	0.883277	17.056	17.0552	0.0216892		-0.76594	0.0245704	0.247281	true	0.217328	true	3	12			1.3776	0.95582	84.0176			N	N	N	N	N	N
213	I21	false	HBx-5	mALDOB	UNKNOWN	SYBR	None	0.842483	0.803573	0.883277	17.017	17.0552	0.0216892		-0.76594	0.0245704	0.247281	true	0.217328	true	3	12			1.37928	0.953832	84.0176			N	N	N	N	N	N
220	J4	false	vec-4	mALDH8A1	UNKNOWN	SYBR	None	0.708099	0.643234	0.779505	21.023	21.0339	0.00713631		3.06239	0.0499224	0.497977	true	0.144222	true	3	16			1.29835	0.976282	84.5309			N	N	N	N	N	N
221	J5	false	vec-4	mALDH8A1	UNKNOWN	SYBR	None	0.708099	0.643234	0.779505	21.048	21.0339	0.00713631		3.06239	0.0499224	0.497977	true	0.144222	true	3	16			1.29646	0.975163	84.5309			N	N	N	N	N	N
222	J6	false	vec-4	mALDH8A1	UNKNOWN	SYBR	None	0.708099	0.643234	0.779505	21.031	21.0339	0.00713631		3.06239	0.0499224	0.497977	true	0.144222	true	3	16			1.29865	0.973721	84.5309			N	N	N	N	N	N
223	J7	false	vec-6	mALDH8A1	UNKNOWN	SYBR	None	0.858422	0.672144	1.09632	20.579	20.7527	0.0875541		2.78465	0.127111	0.220242	true	0.144222	true	3	16			1.30027	0.980434	84.5309			N	N	N	N	N	N
224	J8	false	vec-6	mALDH8A1	UNKNOWN	SYBR	None	0.858422	0.672144	1.09632	20.858	20.7527	0.0875541		2.78465	0.127111	0.220242	true	0.144222	true	3	16			1.29578	0.965107	84.5309			N	N	N	N	N	N
225	J9	false	vec-6	mALDH8A1	UNKNOWN	SYBR	None	0.858422	0.672144	1.09632	20.821	20.7527	0.0875541		2.78465	0.127111	0.220242	true	0.144222	true	3	16			1.29736	0.98226	84.5309			N	N	N	N	N	N
226	J10	false	vec-7	mALDH8A1	UNKNOWN	SYBR	None	0.821547	0.74459	0.906458	20.839	20.7687	0.0398554		2.84799	0.0511076	0.283585	true	0.144222	true	3	16			1.29691	0.983081	84.5309			N	N	N	N	N	N
227	J11	false	vec-7	mALDH8A1	UNKNOWN	SYBR	None	0.821547	0.74459	0.906458	20.766	20.7687	0.0398554		2.84799	0.0511076	0.283585	true	0.144222	true	3	16			1.29599	0.983067	84.5309			N	N	N	N	N	N
228	J12	false	vec-7	mALDH8A1	UNKNOWN	SYBR	None	0.821547	0.74459	0.906458	20.701	20.7687	0.0398554		2.84799	0.0511076	0.283585	true	0.144222	true	3	16			1.30308	0.98389	84.5309			N	N	N	N	N	N
235	J19	false	HBx-5	mALDH8A1	UNKNOWN	SYBR	None	0.76915	0.725876	0.815002	20.801	20.7642	0.0277859		2.94307	0.0300889	0.378664	true	0.144222	true	3	16			1.3041	0.966523	84.4026			N	N	N	N	N	N
236	J20	false	HBx-5	mALDH8A1	UNKNOWN	SYBR	None	0.76915	0.725876	0.815002	20.782	20.7642	0.0277859		2.94307	0.0300889	0.378664	true	0.144222	true	3	16			1.30164	0.965731	84.4026			N	N	N	N	N	N
237	J21	false	HBx-5	mALDH8A1	UNKNOWN	SYBR	None	0.76915	0.725876	0.815002	20.71	20.7642	0.0277859		2.94307	0.0300889	0.378664	true	0.144222	true	3	16			1.30752	0.971618	84.4026			N	N	N	N	N	N
244	K4	false	vec-4	mPALM2	UNKNOWN	SYBR	None	1.25224	1.01229	1.54907	27.595	27.654	0.0988736		9.68246	0.110532	-0.324514	true	0.178507	true	3	22			1.3355	0.973342	82.4777			N	N	N	N	N	N
245	K5	false	vec-4	mPALM2	UNKNOWN	SYBR	None	1.25224	1.01229	1.54907	27.847	27.654	0.0988736		9.68246	0.110532	-0.324514	true	0.178507	true	3	22			1.33404	0.965902	82.3493			N	N	N	N	N	N
246	K6	false	vec-4	mPALM2	UNKNOWN	SYBR	None	1.25224	1.01229	1.54907	27.52	27.654	0.0988736		9.68246	0.110532	-0.324514	true	0.178507	true	3	22			1.33893	0.965254	82.4777			N	N	N	N	N	N
247	K7	false	vec-6	mPALM2	UNKNOWN	SYBR	None	1.32222	1.0317	1.69454	27.674	27.5721	0.0901565		9.60401	0.128917	-0.40296	true	0.178507	true	3	22			1.33742	0.971207	82.3493			N	N	N	N	N	N
248	K8	false	vec-6	mPALM2	UNKNOWN	SYBR	None	1.32222	1.0317	1.69454	27.65	27.5721	0.0901565		9.60401	0.128917	-0.40296	true	0.178507	true	3	22			1.34113	0.971654	82.3493			N	N	N	N	N	N
249	K9	false	vec-6	mPALM2	UNKNOWN	SYBR	None	1.32222	1.0317	1.69454	27.392	27.5721	0.0901565		9.60401	0.128917	-0.40296	true	0.178507	true	3	22			1.33641	0.94896	82.3493			N	N	N	N	N	N
250	K10	false	vec-7	mPALM2	UNKNOWN	SYBR	None	0.967302	0.906346	1.03236	27.971	27.9757	0.0109729		10.0549	0.0338221	0.0479616	true	0.178507	true	3	22			1.33909	0.966707	82.3493			N	N	N	N	N	N
251	K11	false	vec-7	mPALM2	UNKNOWN	SYBR	None	0.967302	0.906346	1.03236	27.997	27.9757	0.0109729		10.0549	0.0338221	0.0479616	true	0.178507	true	3	22			1.34073	0.971603	82.3493			N	N	N	N	N	N
252	K12	false	vec-7	mPALM2	UNKNOWN	SYBR	None	0.967302	0.906346	1.03236	27.959	27.9757	0.0109729		10.0549	0.0338221	0.0479616	true	0.178507	true	3	22			1.34228	0.974332	82.3493			N	N	N	N	N	N
259	K19	false	HBx-5	mPALM2	UNKNOWN	SYBR	None	1.12043	0.933871	1.34426	27.852	27.664	0.0939322		9.84292	0.094639	-0.164055	true	0.178507	true	3	22			1.34641	0.96284	82.3493			N	N	N	N	N	N
260	K20	false	HBx-5	mPALM2	UNKNOWN	SYBR	None	1.12043	0.933871	1.34426	27.574	27.664	0.0939322		9.84292	0.094639	-0.164055	true	0.178507	true	3	22			1.33904	0.960248	82.3493			N	N	N	N	N	N
261	K21	false	HBx-5	mPALM2	UNKNOWN	SYBR	None	1.12043	0.933871	1.34426	27.566	27.664	0.0939322		9.84292	0.094639	-0.164055	true	0.178507	true	3	22			1.3478	0.957263	82.3493			N	N	N	N	N	N
268	L4	false	vec-4	mC8A	UNKNOWN	SYBR	None	0.535779	0.47789	0.60068	21.595	21.5683	0.0329944		3.59672	0.0594134	0.90029	true	0.16554	true	3	16			1.32487	0.971152	83.761			N	N	N	N	N	N
269	L5	false	vec-4	mC8A	UNKNOWN	SYBR	None	0.535779	0.47789	0.60068	21.503	21.5683	0.0329944		3.59672	0.0594134	0.90029	true	0.16554	true	3	16			1.32715	0.967294	83.761			N	N	N	N	N	N
270	L6	false	vec-4	mC8A	UNKNOWN	SYBR	None	0.535779	0.47789	0.60068	21.607	21.5683	0.0329944		3.59672	0.0594134	0.90029	true	0.16554	true	3	17			1.32153	0.959071	83.761			N	N	N	N	N	N
271	L7	false	vec-6	mC8A	UNKNOWN	SYBR	None	0.637614	0.524023	0.775827	21.322	21.3137	0.04361		3.34568	0.101948	0.649245	true	0.16554	true	3	16			1.32157	0.970099	83.761			N	N	N	N	N	N
272	L8	false	vec-6	mC8A	UNKNOWN	SYBR	None	0.637614	0.524023	0.775827	21.385	21.3137	0.04361		3.34568	0.101948	0.649245	true	0.16554	true	3	16			1.32052	0.967713	83.761			N	N	N	N	N	N
273	L9	false	vec-6	mC8A	UNKNOWN	SYBR	None	0.637614	0.524023	0.775827	21.234	21.3137	0.04361		3.34568	0.101948	0.649245	true	0.16554	true	3	16			1.31366	0.972518	83.761			N	N	N	N	N	N
274	L10	false	vec-7	mC8A	UNKNOWN	SYBR	None	0.699097	0.647663	0.754617	21.098	21.1336	0.0235223		3.21287	0.0397093	0.516435	true	0.16554	true	3	16			1.32843	0.968703	83.761			N	N	N	N	N	N
275	L11	false	vec-7	mC8A	UNKNOWN	SYBR	None	0.699097	0.647663	0.754617	21.178	21.1336	0.0235223		3.21287	0.0397093	0.516435	true	0.16554	true	3	16			1.32491	0.943633	83.761			N	N	N	N	N	N
276	L12	false	vec-7	mC8A	UNKNOWN	SYBR	None	0.699097	0.647663	0.754617	21.124	21.1336	0.0235223		3.21287	0.0397093	0.516435	true	0.16554	true	3	16			1.32543	0.963087	83.761			N	N	N	N	N	N
283	L19	false	HBx-5	mC8A	UNKNOWN	SYBR	None	0.653834	0.593735	0.720016	21.219	21.1305	0.0487534		3.30944	0.0501017	0.613003	true	0.16554	true	3	16			1.32473	0.951469	83.6326			N	N	N	N	N	N
284	L20	false	HBx-5	mC8A	UNKNOWN	SYBR	None	0.653834	0.593735	0.720016	21.122	21.1305	0.0487534		3.30944	0.0501017	0.613003	true	0.16554	true	3	16			1.32395	0.949547	83.6326			N	N	N	N	N	N
285	L21	false	HBx-5	mC8A	UNKNOWN	SYBR	None	0.653834	0.593735	0.720016	21.051	21.1305	0.0487534		3.30944	0.0501017	0.613003	true	0.16554	true	3	16			1.32802	0.956757	83.6326			N	N	N	N	N	N
292	M4	false	vec-4	mTAT	UNKNOWN	SYBR	None	0.330268	0.297397	0.366771	20.173	20.1603	0.0229371		2.18877	0.0544742	1.59829	true	0.187007	true	3	15			1.37281	0.955444	85.8142			N	N	N	N	N	N
293	M5	false	vec-4	mTAT	UNKNOWN	SYBR	None	0.330268	0.297397	0.366771	20.192	20.1603	0.0229371		2.18877	0.0544742	1.59829	true	0.187007	true	3	15			1.37385	0.958775	85.8142			N	N	N	N	N	N
294	M6	false	vec-4	mTAT	UNKNOWN	SYBR	None	0.330268	0.297397	0.366771	20.116	20.1603	0.0229371		2.18877	0.0544742	1.59829	true	0.187007	true	3	15			1.37622	0.962722	85.8142			N	N	N	N	N	N
295	M7	false	vec-6	mTAT	UNKNOWN	SYBR	None	0.345789	0.287304	0.416179	20.143	20.0906	0.0278943		2.12251	0.0962787	1.53204	true	0.187007	true	3	15			1.37392	0.95371	85.8142			N	N	N	N	N	N
296	M8	false	vec-6	mTAT	UNKNOWN	SYBR	None	0.345789	0.287304	0.416179	20.047	20.0906	0.0278943		2.12251	0.0962787	1.53204	true	0.187007	true	3	15			1.37545	0.963273	85.8142			N	N	N	N	N	N
297	M9	false	vec-6	mTAT	UNKNOWN	SYBR	None	0.345789	0.287304	0.416179	20.082	20.0906	0.0278943		2.12251	0.0962787	1.53204	true	0.187007	true	3	15			1.37265	0.9649	85.8142			N	N	N	N	N	N
298	M10	false	vec-7	mTAT	UNKNOWN	SYBR	None	0.367059	0.331898	0.405945	20.038	19.9571	0.0414024		2.03639	0.0523229	1.44592	true	0.187007	true	3	15			1.37656	0.959881	85.8142			N	N	N	N	N	N
299	M11	false	vec-7	mTAT	UNKNOWN	SYBR	None	0.367059	0.331898	0.405945	19.932	19.9571	0.0414024		2.03639	0.0523229	1.44592	true	0.187007	true	3	15			1.37208	0.964722	85.8142			N	N	N	N	N	N
300	M12	false	vec-7	mTAT	UNKNOWN	SYBR	None	0.367059	0.331898	0.405945	19.902	19.9571	0.0414024		2.03639	0.0523229	1.44592	true	0.187007	true	3	15			1.38094	0.968428	85.8142			N	N	N	N	N	N
307	M19	false	HBx-5	mTAT	UNKNOWN	SYBR	None	0.411719	0.399205	0.424626	19.685	19.6919	0.0111333		1.87075	0.0160386	1.28027	true	0.187007	true	3	14			1.37437	0.954413	85.6859			N	N	N	N	N	N
308	M20	false	HBx-5	mTAT	UNKNOWN	SYBR	None	0.411719	0.399205	0.424626	19.714	19.6919	0.0111333		1.87075	0.0160386	1.28027	true	0.187007	true	3	15			1.37845	0.952332	85.6859			N	N	N	N	N	N
309	M21	false	HBx-5	mTAT	UNKNOWN	SYBR	None	0.411719	0.399205	0.424626	19.677	19.6919	0.0111333		1.87075	0.0160386	1.28027	true	0.187007	true	3	14			1.37346	0.941292	85.6859			N	N	N	N	N	N
316	N4	false	vec-4	mANGPTL6	UNKNOWN	SYBR	None	0.294751	0.2605	0.333505	26.664	26.6168	0.0409724		8.64525	0.0641877	1.76243	true	0.20341	true	3	21			1.36628	0.979322	88.5091			N	N	N	N	N	N
317	N5	false	vec-4	mANGPTL6	UNKNOWN	SYBR	None	0.294751	0.2605	0.333505	26.651	26.6168	0.0409724		8.64525	0.0641877	1.76243	true	0.20341	true	3	21			1.36491	0.96085	88.3808			N	N	N	N	N	N
318	N6	false	vec-4	mANGPTL6	UNKNOWN	SYBR	None	0.294751	0.2605	0.333505	26.535	26.6168	0.0409724		8.64525	0.0641877	1.76243	true	0.20341	true	3	21			1.36643	0.97309	88.3808			N	N	N	N	N	N
319	N7	false	vec-6	mANGPTL6	UNKNOWN	SYBR	None	0.278475	0.226952	0.341694	26.747	26.6953	0.0530098		8.7272	0.106309	1.84438	true	0.20341	true	3	21			1.37031	0.977234	88.3808			N	N	N	N	N	N
320	N8	false	vec-6	mANGPTL6	UNKNOWN	SYBR	None	0.278475	0.226952	0.341694	26.749	26.6953	0.0530098		8.7272	0.106309	1.84438	true	0.20341	true	3	21			1.36831	0.965617	88.3808			N	N	N	N	N	N
321	N9	false	vec-6	mANGPTL6	UNKNOWN	SYBR	None	0.278475	0.226952	0.341694	26.589	26.6953	0.0530098		8.7272	0.106309	1.84438	true	0.20341	true	3	21			1.36119	0.968223	88.5091			N	N	N	N	N	N
322	N10	false	vec-7	mANGPTL6	UNKNOWN	SYBR	None	0.289865	0.245978	0.341582	26.625	26.5901	0.0790811		8.66937	0.0853074	1.78655	true	0.20341	true	3	21			1.36321	0.97014	88.5091			N	N	N	N	N	N
323	N11	false	vec-7	mANGPTL6	UNKNOWN	SYBR	None	0.289865	0.245978	0.341582	26.439	26.5901	0.0790811		8.66937	0.0853074	1.78655	true	0.20341	true	3	21			1.35716	0.966401	88.3808			N	N	N	N	N	N
324	N12	false	vec-7	mANGPTL6	UNKNOWN	SYBR	None	0.289865	0.245978	0.341582	26.706	26.5901	0.0790811		8.66937	0.0853074	1.78655	true	0.20341	true	3	21			1.36089	0.968036	88.3808			N	N	N	N	N	N
331	N19	false	HBx-5	mANGPTL6	UNKNOWN	SYBR	None	0.21374	0.162669	0.280844	26.65	26.93	0.141407		9.10889	0.141877	2.22607	true	0.20341	true	3	21			1.36931	0.961776	88.2524			N	N	N	N	N	N
332	N20	false	HBx-5	mANGPTL6	UNKNOWN	SYBR	None	0.21374	0.162669	0.280844	27.039	26.93	0.141407		9.10889	0.141877	2.22607	true	0.20341	true	3	22			1.37072	0.953438	88.3808			N	N	N	N	N	N
333	N21	false	HBx-5	mANGPTL6	UNKNOWN	SYBR	None	0.21374	0.162669	0.280844	27.102	26.93	0.141407		9.10889	0.141877	2.22607	true	0.20341	true	3	22			1.36898	0.956853	88.2524			N	N	N	N	N	N
340	O4	false	vec-4	mMAGEA6	UNKNOWN	SYBR	None				Undetermined	36.7688						true	0.04	true	3	39			0	0	61.3036	82.991		Y	Y	N	Y	Y	N
341	O5	false	vec-4	mMAGEA6	UNKNOWN	SYBR	None				Undetermined	36.7688						true	0.04	true	3	39			0	0	61.3036			N	Y	N	Y	Y	N
342	O6	false	vec-4	mMAGEA6	UNKNOWN	SYBR	None	0.116165			36.769	36.7688			18.7972		3.10575	true	0.04	true	3	34			1.03499	0.901452	82.8627			N	N	N	N	Y	N
343	O7	false	vec-6	mMAGEA6	UNKNOWN	SYBR	None				Undetermined	36.1801						true	0.04	true	3	39			0	0	61.1752			N	Y	N	Y	Y	N
344	O8	false	vec-6	mMAGEA6	UNKNOWN	SYBR	None	0.174275			36.18	36.1801			18.2121		2.52057	true	0.04	true	3	33			1.12592	0.89866	82.8627			N	N	N	N	Y	N
345	O9	false	vec-6	mMAGEA6	UNKNOWN	SYBR	None				Undetermined	36.1801						true	0.04	true	3	39			0	0	61.3036			N	Y	N	Y	Y	N
346	O10	false	vec-7	mMAGEA6	UNKNOWN	SYBR	None	0.100118			36.932	36.9324			19.0117		3.32022	true	0.04	true	3	34			1.02312	0.872661	82.8627			N	N	N	N	Y	N
347	O11	false	vec-7	mMAGEA6	UNKNOWN	SYBR	None				Undetermined	36.9324						true	0.04	true	3	39			0	0	61.3036			N	Y	N	Y	Y	N
348	O12	false	vec-7	mMAGEA6	UNKNOWN	SYBR	None				Undetermined	36.9324						true	0.04	true	3	39			0	0	61.3036	84.0176	92.3589	Y	Y	N	Y	Y	N
355	O19	false	HBx-5	mMAGEA6	UNKNOWN	SYBR	None				Undetermined							true	0.04	true	3	39			0	0	61.3036			N	Y	N	Y	Y	N
356	O20	false	HBx-5	mMAGEA6	UNKNOWN	SYBR	None				Undetermined							true	0.04	true	3	39			0	0	61.3036			N	Y	N	Y	Y	N
357	O21	false	HBx-5	mMAGEA6	UNKNOWN	SYBR	None				Undetermined							true	0.04	true	3	39			0	0	61.1752	88.1241	83.1193	Y	Y	N	Y	Y	N
Analysis Type	Singleplex
Endogenous Control	mCYC
RQ Min/Max Confidence Level	95.0
Reference Sample	vec-1

## Sheet: Melt Curve Raw Data
Block Type	384-Well Block
Calibration Background is expired	Yes
Calibration Background performed on	10-12-2018 11:47:46 PDT
Calibration FAM is expired	Yes
Calibration FAM performed on	10-23-2018 10:23:19 PDT
Calibration MELTDOCTOR is expired	Yes
Calibration MELTDOCTOR performed on	09-26-2017 21:22:46 PDT
Calibration NED is expired	Yes
Calibration NED performed on	10-23-2018 10:33:14 PDT
Calibration ROI is expired	Yes
Calibration ROI performed on	10-12-2018 09:37:21 PDT
Calibration ROX is expired	Yes
Calibration ROX performed on	10-23-2018 10:07:21 PDT
Calibration SYBR is expired	Yes
Calibration SYBR performed on	10-23-2018 09:57:53 PDT
Calibration TAMRA is expired	Yes
Calibration TAMRA performed on	10-23-2018 10:45:25 PDT
Calibration Uniformity is expired	Yes
Calibration Uniformity performed on	10-12-2018 10:06:59 PDT
Calibration VIC is expired	Yes
Calibration VIC performed on	10-23-2018 10:54:25 PDT
Chemistry	SYBR_GREEN
Date Created	02-07-2021 22:20:49 PST
Experiment File Name	D:\NZZ\2021-02-07 205722.eds
Experiment Name	2021-02-07 205722
Experiment Run End Time	02-07-2021 15:32:51 PST
Experiment Type	Comparative Cт (ΔΔCт)
Instrument Name	285880860
Instrument Serial Number	285880860
Instrument Type	QuantStudio 12K Flex
Passive Reference	ROX
Quantification Cycle Method	Ct
Signal Smoothing On	true
Stage/ Cycle where Analysis is performed	Stage 2, Step 2
Well	Well Position	Reading	Temperature	Fluorescence	Derivative
1	A1	1	60.1486	1.96216	0.0869299
1	A1	2	60.4053	1.95183	0.0875292
1	A1	3	60.6619	1.94752	0.0881776
1	A1	4	60.9186	1.92995	0.0888155
1	A1	5	61.1752	1.91606	0.0894642
1	A1	6	61.4319	1.9111	0.0901441
1	A1	7	61.6885	1.90552	0.090758
1	A1	8	61.9452	1.88598	0.0910792
1	A1	9	62.2019	1.87448	0.0908761
1	A1	10	62.4585	1.86081	0.0900838
1	A1	11	62.7152	1.85188	0.0888861
1	A1	12	62.9718	1.84095	0.0876318
1	A1	13	63.2285	1.82796	0.0866461
1	A1	14	63.4851	1.82268	0.0860595
1	A1	15	63.7418	1.81182	0.0857628
1	A1	16	63.9984	1.79784	0.0854916
1	A1	17	64.2551	1.78259	0.0849761
1	A1	18	64.5118	1.78264	0.0840711
1	A1	19	64.7684	1.76166	0.0828097
1	A1	20	65.0251	1.75648	0.0813786
1	A1	21	65.2817	1.74218	0.0800403
1	A1	22	65.5384	1.73791	0.0790286
1	A1	23	65.795	1.72783	0.0784694
1	A1	24	66.0517	1.71555	0.078338
1	A1	25	66.3083	1.70631	0.0784829
1	A1	26	66.565	1.69821	0.0786885
1	A1	27	66.8217	1.69239	0.0787512
1	A1	28	67.0783	1.66833	0.0785392
1	A1	29	67.335	1.66949	0.0780133
1	A1	30	67.5916	1.6595	0.0772181
1	A1	31	67.8483	1.64704	0.0762599
1	A1	32	68.1049	1.6366	0.0752937
1	A1	33	68.3616	1.62541	0.0744693
1	A1	34	68.6183	1.62099	0.0738429
1	A1	35	68.8749	1.61398	0.0732873
1	A1	36	69.1316	1.6013	0.0724756
1	A1	37	69.3882	1.59197	0.0709878
1	A1	38	69.6449	1.58081	0.0684893
1	A1	39	69.9015	1.57034	0.0648778
1	A1	40	70.1582	1.56543	0.0603288
1	A1	41	70.4148	1.5568	0.0552481
1	A1	42	70.6715	1.55019	0.0501955
1	A1	43	70.9282	1.54401	0.0458138
1	A1	44	71.1848	1.54054	0.0427603
1	A1	45	71.4415	1.53546	0.0415975
1	A1	46	71.6981	1.53634	0.0426481
1	A1	47	71.9548	1.52748	0.0458518
1	A1	48	72.2114	1.52707	0.0507089
1	A1	49	72.4681	1.52056	0.0563734
1	A1	50	72.7247	1.51121	0.0619054
1	A1	51	72.9814	1.49806	0.0665823
1	A1	52	73.2381	1.48934	0.0701155
1	A1	53	73.4947	1.47703	0.0726569
1	A1	54	73.7514	1.47344	0.0745895
1	A1	55	74.008	1.46434	0.0762495
1	A1	56	74.2647	1.45633	0.0777509
1	A1	57	74.5213	1.43833	0.079001
1	A1	58	74.778	1.43469	0.0798597
1	A1	59	75.0347	1.42196	0.0803166
1	A1	60	75.2913	1.41094	0.0805593
1	A1	61	75.548	1.39896	0.0809046
1	A1	62	75.8046	1.39336	0.0816332
1	A1	63	76.0613	1.38517	0.08283
1	A1	64	76.3179	1.37225	0.0843273
1	A1	65	76.5746	1.36325	0.0857959
1	A1	66	76.8312	1.3481	0.0869156
1	A1	67	77.0879	1.33621	0.0875188
1	A1	68	77.3446	1.32817	0.0876269
1	A1	69	77.6012	1.31755	0.0873788
1	A1	70	77.8579	1.30381	0.0869304
1	A1	71	78.1145	1.29482	0.086387
1	A1	72	78.3712	1.28299	0.0857989
1	A1	73	78.6278	1.2734	0.0851892
1	A1	74	78.8845	1.26077	0.0845837
1	A1	75	79.1412	1.25025	0.0840296
1	A1	76	79.3978	1.24272	0.0836105
1	A1	77	79.6545	1.22891	0.0834604
1	A1	78	79.9111	1.2181	0.0837863
1	A1	79	80.1678	1.21091	0.0848639
1	A1	80	80.4244	1.19843	0.0870038
1	A1	81	80.6811	1.18795	0.0904778
1	A1	82	80.9377	1.18007	0.0954403
1	A1	83	81.1944	1.16729	0.101868
1	A1	84	81.4511	1.15524	0.109547
1	A1	85	81.7077	1.13462	0.118078
1	A1	86	81.9644	1.12724	0.126961
1	A1	87	82.221	1.10875	0.135816
1	A1	88	82.4777	1.0895	0.144852
1	A1	89	82.7343	1.06484	0.155533
1	A1	90	82.991	1.04182	0.171195
1	A1	91	83.2477	1.02347	0.197126
1	A1	92	83.5043	1.01414	0.239656
1	A1	93	83.761	0.997531	0.304085
1	A1	94	84.0176	0.975535	0.391824
1	A1	95	84.2743	0.942596	0.497728
1	A1	96	84.5309	0.885721	0.609
1	A1	97	84.7876	0.780692	0.706845
1	A1	98	85.0442	0.618145	0.771062
1	A1	99	85.3009	0.441291	0.786234
1	A1	100	85.5576	0.289002	0.747027
1	A1	101	85.8142	0.177893	0.660153
1	A1	102	86.0709	0.121259	0.542054
1	A1	103	86.3275	0.100615	0.413399
1	A1	104	86.5842	0.0940861	0.292925
1	A1	105	86.8408	0.0915983	0.193091
1	A1	106	87.0975	0.0900759	0.118775
1	A1	107	87.3541	0.089556	0.0686299
1	A1	108	87.6108	0.0886908	0.0377646
1	A1	109	87.8675	0.0876342	0.0203475
1	A1	110	88.1241	0.0882467	0.0112996
1	A1	111	88.3808	0.0872159	0.00695914
1	A1	112	88.6374	0.0872983	0.00502483
1	A1	113	88.8941	0.0865198	0.00419463
1	A1	114	89.1507	0.0854076	0.00379312
1	A1	115	89.4074	0.0855086	0.00350882
1	A1	116	89.664	0.0842191	0.00323992
1	A1	117	89.9207	0.0852225	0.00300027
1	A1	118	90.1774	0.0845763	0.0028491
1	A1	119	90.434	0.0842968	0.00283446
1	A1	120	90.6907	0.083626	0.00295673
1	A1	121	90.9473	0.0843877	0.00316008
1	A1	122	91.204	0.0824752	0.00335135
1	A1	123	91.4606	0.0825165	0.00343755
1	A1	124	91.7173	0.0812547	0.00336604
1	A1	125	91.974	0.0811556	0.00314706
1	A1	126	92.2306	0.080993	0.00284502
1	A1	127	92.4873	0.0819423	0.00254341
1	A1	128	92.7439	0.080158	0.00230305
1	A1	129	93.0006	0.080329	0.0021384
1	A1	130	93.2572	0.0808456	0.0020208
1	A1	131	93.5139	0.0796201	0.0019014
1	A1	132	93.7705	0.0795378	0.00173766
1	A1	133	94.0272	0.0792397	0.00151123
1	A1	134	94.2839	0.0796198	0.00123176
1	A1	135	94.5405	0.0791988	0.000929061
1	A1	136	94.7972	0.0790524	0.000639575
2	A2	1	60.1486	1.98096	0.0861693
2	A2	2	60.4053	1.97434	0.0874013
2	A2	3	60.6619	1.95821	0.0889437
2	A2	4	60.9186	1.95052	0.0905409
2	A2	5	61.1752	1.94055	0.0918953
2	A2	6	61.4319	1.92569	0.0927086
2	A2	7	61.6885	1.91606	0.0927467
2	A2	8	61.9452	1.90281	0.0919316
2	A2	9	62.2019	1.88163	0.090401
2	A2	10	62.4585	1.87912	0.0884832
2	A2	11	62.7152	1.86982	0.0865839
2	A2	12	62.9718	1.85354	0.0850477
2	A2	13	63.2285	1.84671	0.0840717
2	A2	14	63.4851	1.8336	0.0836885
2	A2	15	63.7418	1.82838	0.0837903
2	A2	16	63.9984	1.81173	0.0841716
2	A2	17	64.2551	1.80496	0.0845797
2	A2	18	64.5118	1.79147	0.084773
2	A2	19	64.7684	1.78406	0.0845919
2	A2	20	65.0251	1.7673	0.0839965
2	A2	21	65.2817	1.75482	0.0830676
2	A2	22	65.5384	1.75377	0.081956
2	A2	23	65.795	1.73848	0.0808298
2	A2	24	66.0517	1.72599	0.0798479
2	A2	25	66.3083	1.71659	0.0791384
2	A2	26	66.565	1.7096	0.078763
2	A2	27	66.8217	1.69705	0.0786632
2	A2	28	67.0783	1.69413	0.0786476
2	A2	29	67.335	1.67626	0.0784596
2	A2	30	67.5916	1.66599	0.0779053
2	A2	31	67.8483	1.65693	0.0769557
2	A2	32	68.1049	1.64841	0.075745
2	A2	33	68.3616	1.63427	0.0744724
2	A2	34	68.6183	1.63502	0.0732751
2	A2	35	68.8749	1.61693	0.0721507
2	A2	36	69.1316	1.60951	0.0709666
2	A2	37	69.3882	1.60331	0.0695192
2	A2	38	69.6449	1.59144	0.0676125
2	A2	39	69.9015	1.58423	0.0651289
2	A2	40	70.1582	1.57184	0.0620655
2	A2	41	70.4148	1.56631	0.058542
2	A2	42	70.6715	1.56141	0.0547859
2	A2	43	70.9282	1.55195	0.0511274
2	A2	44	71.1848	1.54614	0.0479888
2	A2	45	71.4415	1.54143	0.045855
2	A2	46	71.6981	1.53397	0.0451721
2	A2	47	71.9548	1.53478	0.0461884
2	A2	48	72.2114	1.53036	0.0488173
2	A2	49	72.4681	1.52221	0.0526199
2	A2	50	72.7247	1.51872	0.05696
2	A2	51	72.9814	1.50251	0.0612466
2	A2	52	73.2381	1.49794	0.0651269
2	A2	53	73.4947	1.48661	0.0685269
2	A2	54	73.7514	1.48376	0.0715337
2	A2	55	74.008	1.46867	0.0742322
2	A2	56	74.2647	1.46099	0.0766004
2	A2	57	74.5213	1.45369	0.0785308
2	A2	58	74.778	1.43858	0.0799243
2	A2	59	75.0347	1.42527	0.0807748
2	A2	60	75.2913	1.42014	0.0811843
2	A2	61	75.548	1.40997	0.0813108
2	A2	62	75.8046	1.39712	0.0813114
2	A2	63	76.0613	1.3871	0.0813071
2	A2	64	76.3179	1.37574	0.0813899
2	A2	65	76.5746	1.36798	0.0816163
2	A2	66	76.8312	1.35661	0.0819954
2	A2	67	77.0879	1.34646	0.0824618
2	A2	68	77.3446	1.33622	0.0828838
2	A2	69	77.6012	1.32299	0.0831095
2	A2	70	77.8579	1.31599	0.0830392
2	A2	71	78.1145	1.3016	0.0826865
2	A2	72	78.3712	1.28948	0.0821964
2	A2	73	78.6278	1.28317	0.0817973
2	A2	74	78.8845	1.26996	0.0817086
2	A2	75	79.1412	1.26336	0.0820514
2	A2	76	79.3978	1.25017	0.082818
2	A2	77	79.6545	1.24113	0.0839178
2	A2	78	79.9111	1.22728	0.0852774
2	A2	79	80.1678	1.2184	0.0869238
2	A2	80	80.4244	1.2044	0.0890282
2	A2	81	80.6811	1.19744	0.0918842
2	A2	82	80.9377	1.1851	0.0958474
2	A2	83	81.1944	1.16955	0.101237
2	A2	84	81.4511	1.15834	0.108196
2	A2	85	81.7077	1.1498	0.116558
2	A2	86	81.9644	1.13407	0.12584
2	A2	87	82.221	1.11446	0.135508
2	A2	88	82.4777	1.09453	0.145596
2	A2	89	82.7343	1.06967	0.157504
2	A2	90	82.991	1.04602	0.174634
2	A2	91	83.2477	1.0322	0.202381
2	A2	92	83.5043	1.01572	0.247095
2	A2	93	83.761	0.998979	0.313931
2	A2	94	84.0176	0.975854	0.403948
2	A2	95	84.2743	0.942674	0.511488
2	A2	96	84.5309	0.880065	0.623189
2	A2	97	84.7876	0.768198	0.719847
2	A2	98	85.0442	0.595692	0.781222
2	A2	99	85.3009	0.416083	0.792337
2	A2	100	85.5576	0.262458	0.748677
2	A2	101	85.8142	0.150863	0.657877
2	A2	102	86.0709	0.0968515	0.537079
2	A2	103	86.3275	0.0770803	0.407232
2	A2	104	86.5842	0.0711325	0.286915
2	A2	105	86.8408	0.0698095	0.188153
2	A2	106	87.0975	0.0674747	0.115309
2	A2	107	87.3541	0.0665265	0.0666134
2	A2	108	87.6108	0.0662973	0.0369207
2	A2	109	87.8675	0.0647293	0.0203055
2	A2	110	88.1241	0.0645515	0.0117084
2	A2	111	88.3808	0.0642202	0.00754727
2	A2	112	88.6374	0.0637042	0.0056218
2	A2	113	88.8941	0.0629291	0.0047254
2	A2	114	89.1507	0.0622844	0.00425157
2	A2	115	89.4074	0.0618951	0.00391542
2	A2	116	89.664	0.0614843	0.00359598
2	A2	117	89.9207	0.060964	0.00325911
2	A2	118	90.1774	0.0607245	0.00292013
2	A2	119	90.434	0.0598195	0.00261961
2	A2	120	90.6907	0.060889	0.00240011
2	A2	121	90.9473	0.0604344	0.00228467
2	A2	122	91.204	0.0594842	0.00226478
2	A2	123	91.4606	0.0591923	0.00230408
2	A2	124	91.7173	0.0596114	0.00235525
2	A2	125	91.974	0.0585455	0.00237982
2	A2	126	92.2306	0.0584738	0.00236017
2	A2	127	92.4873	0.0575745	0.002299
2	A2	128	92.7439	0.0584687	0.00220892
2	A2	129	93.0006	0.0579318	0.00210008
2	A2	130	93.2572	0.0569609	0.00197443
2	A2	131	93.5139	0.0568351	0.00182836
2	A2	132	93.7705	0.0570151	0.00165849
2	A2	133	94.0272	0.0569597	0.00146317
2	A2	134	94.2839	0.0569972	0.00124032
2	A2	135	94.5405	0.0559357	0.000988932
2	A2	136	94.7972	0.0557921	0.000716737
3	A3	1	60.1486	2.03631	0.0913076
3	A3	2	60.4053	2.02318	0.0915485
3	A3	3	60.6619	2.0086	0.0915834
3	A3	4	60.9186	2.00249	0.0914574
3	A3	5	61.1752	1.98641	0.0913329
3	A3	6	61.4319	1.98009	0.0913831
3	A3	7	61.6885	1.97079	0.0916914
3	A3	8	61.9452	1.95269	0.0922351
3	A3	9	62.2019	1.94071	0.0929207
3	A3	10	62.4585	1.93301	0.0936265
3	A3	11	62.7152	1.91987	0.0942039
3	A3	12	62.9718	1.91069	0.0944711
3	A3	13	63.2285	1.8887	0.0942435
3	A3	14	63.4851	1.8843	0.0934129
3	A3	15	63.7418	1.87276	0.092029
3	A3	16	63.9984	1.85474	0.0903257
3	A3	17	64.2551	1.84114	0.0886425
3	A3	18	64.5118	1.83734	0.0872792
3	A3	19	64.7684	1.83167	0.0863646
3	A3	20	65.0251	1.81388	0.0858432
3	A3	21	65.2817	1.79988	0.0855745
3	A3	22	65.5384	1.79169	0.0854552
3	A3	23	65.795	1.7823	0.0854561
3	A3	24	66.0517	1.77152	0.0855598
3	A3	25	66.3083	1.76212	0.0856902
3	A3	26	66.565	1.74846	0.085706
3	A3	27	66.8217	1.73531	0.0854651
3	A3	28	67.0783	1.72819	0.0848943
3	A3	29	67.335	1.71536	0.0840114
3	A3	30	67.5916	1.70408	0.0828854
3	A3	31	67.8483	1.69367	0.0815819
3	A3	32	68.1049	1.68498	0.0801255
3	A3	33	68.3616	1.67465	0.078514
3	A3	34	68.6183	1.66222	0.0767537
3	A3	35	68.8749	1.65315	0.074893
3	A3	36	69.1316	1.64418	0.0730123
3	A3	37	69.3882	1.63532	0.0711735
3	A3	38	69.6449	1.62808	0.0693609
3	A3	39	69.9015	1.61762	0.067455
3	A3	40	70.1582	1.60674	0.065279
3	A3	41	70.4148	1.60401	0.0626885
3	A3	42	70.6715	1.59161	0.0596966
3	A3	43	70.9282	1.58182	0.0565452
3	A3	44	71.1848	1.57703	0.0536904
3	A3	45	71.4415	1.57143	0.0516818
3	A3	46	71.6981	1.56828	0.0509835
3	A3	47	71.9548	1.5637	0.0518319
3	A3	48	72.2114	1.55362	0.0541766
3	A3	49	72.4681	1.54995	0.057717
3	A3	50	72.7247	1.54285	0.0619801
3	A3	51	72.9814	1.5337	0.0664114
3	A3	52	73.2381	1.52522	0.0704781
3	A3	53	73.4947	1.51418	0.0737781
3	A3	54	73.7514	1.50064	0.076143
3	A3	55	74.008	1.49684	0.0776893
3	A3	56	74.2647	1.47772	0.0787678
3	A3	57	74.5213	1.47414	0.0798198
3	A3	58	74.778	1.46313	0.0811774
3	A3	59	75.0347	1.45763	0.0829072
3	A3	60	75.2913	1.43956	0.0847749
3	A3	61	75.548	1.4358	0.0863592
3	A3	62	75.8046	1.41824	0.0872687
3	A3	63	76.0613	1.40654	0.0873504
3	A3	64	76.3179	1.39363	0.0867781
3	A3	65	76.5746	1.38435	0.0859757
3	A3	66	76.8312	1.37498	0.0854065
3	A3	67	77.0879	1.36559	0.0853558
3	A3	68	77.3446	1.35519	0.0858219
3	A3	69	77.6012	1.34504	0.0865646
3	A3	70	77.8579	1.32912	0.0872697
3	A3	71	78.1145	1.3197	0.0877135
3	A3	72	78.3712	1.30689	0.0878438
3	A3	73	78.6278	1.29864	0.0877493
3	A3	74	78.8845	1.28516	0.0875799
3	A3	75	79.1412	1.27352	0.087472
3	A3	76	79.3978	1.26312	0.0875197
3	A3	77	79.6545	1.25311	0.0877973
3	A3	78	79.9111	1.2407	0.0884116
3	A3	79	80.1678	1.22761	0.0895512
3	A3	80	80.4244	1.21807	0.0915074
3	A3	81	80.6811	1.20629	0.0946336
3	A3	82	80.9377	1.19683	0.0992561
3	A3	83	81.1944	1.18419	0.105563
3	A3	84	81.4511	1.17019	0.113493
3	A3	85	81.7077	1.15444	0.122676
3	A3	86	81.9644	1.14098	0.132494
3	A3	87	82.221	1.12495	0.142377
3	A3	88	82.4777	1.1022	0.152411
3	A3	89	82.7343	1.07281	0.164144
3	A3	90	82.991	1.04806	0.181249
3	A3	91	83.2477	1.036	0.209496
3	A3	92	83.5043	1.02198	0.255624
3	A3	93	83.761	1.00137	0.324995
3	A3	94	84.0176	0.977382	0.418512
3	A3	95	84.2743	0.949697	0.529905
3	A3	96	84.5309	0.876976	0.644851
3	A3	97	84.7876	0.760343	0.743133
3	A3	98	85.0442	0.582722	0.803826
3	A3	99	85.3009	0.39611	0.811908
3	A3	100	85.5576	0.238697	0.763507
3	A3	101	85.8142	0.130383	0.667358
3	A3	102	86.0709	0.0796502	0.541735
3	A3	103	86.3275	0.0616864	0.408352
3	A3	104	86.5842	0.055825	0.286017
3	A3	105	86.8408	0.0529968	0.186524
3	A3	106	87.0975	0.0516735	0.11378
3	A3	107	87.3541	0.0514491	0.0655715
3	A3	108	87.6108	0.0500823	0.0364356
3	A3	109	87.8675	0.0493167	0.0202729
3	A3	110	88.1241	0.048358	0.0119523
3	A3	111	88.3808	0.0477127	0.00788539
3	A3	112	88.6374	0.0470567	0.00591219
3	A3	113	88.8941	0.0469599	0.00489997
3	A3	114	89.1507	0.0463077	0.00432921
3	A3	115	89.4074	0.0457923	0.00398744
3	A3	116	89.664	0.0455827	0.00378747
3	A3	117	89.9207	0.0449474	0.00367852
3	A3	118	90.1774	0.0445911	0.00361326
3	A3	119	90.434	0.0443914	0.00354424
3	A3	120	90.6907	0.0430652	0.00343483
3	A3	121	90.9473	0.0430804	0.00327341
3	A3	122	91.204	0.0425735	0.00307976
3	A3	123	91.4606	0.0425511	0.00289608
3	A3	124	91.7173	0.042354	0.00276522
3	A3	125	91.974	0.0419527	0.00270843
3	A3	126	92.2306	0.0417617	0.00271623
3	A3	127	92.4873	0.0407933	0.00275585
3	A3	128	92.7439	0.0407342	0.00278719
3	A3	129	93.0006	0.0407127	0.00277539
3	A3	130	93.2572	0.0396502	0.00269464
3	A3	131	93.5139	0.0399298	0.00252786
3	A3	132	93.7705	0.0391645	0.00226866
3	A3	133	94.0272	0.0386539	0.00192724
3	A3	134	94.2839	0.0388132	0.0015337
3	A3	135	94.5405	0.0393718	0.00113246
3	A3	136	94.7972	0.0384514	0.000768728
4	A4	1	60.1486	2.08617	0.0915976
4	A4	2	60.4053	2.0728	0.091985
4	A4	3	60.6619	2.06218	0.0923808
4	A4	4	60.9186	2.05118	0.092774
4	A4	5	61.1752	2.04176	0.0932126
4	A4	6	61.4319	2.02766	0.0937421
4	A4	7	61.6885	2.01829	0.0943475
4	A4	8	61.9452	2.00139	0.0949146
4	A4	9	62.2019	1.99501	0.0952546
4	A4	10	62.4585	1.97842	0.0951715
4	A4	11	62.7152	1.96689	0.0945562
4	A4	12	62.9718	1.95489	0.093464
4	A4	13	63.2285	1.93946	0.0921291
4	A4	14	63.4851	1.92625	0.0908709
4	A4	15	63.7418	1.92541	0.0899534
4	A4	16	63.9984	1.90626	0.0894663
4	A4	17	64.2551	1.90078	0.0893244
4	A4	18	64.5118	1.88092	0.0893568
4	A4	19	64.7684	1.87488	0.0894241
4	A4	20	65.0251	1.86075	0.0894751
4	A4	21	65.2817	1.855	0.0895336
4	A4	22	65.5384	1.83649	0.0896432
4	A4	23	65.795	1.82746	0.0898089
4	A4	24	66.0517	1.81421	0.0899483
4	A4	25	66.3083	1.81231	0.0898887
4	A4	26	66.565	1.79018	0.0894291
4	A4	27	66.8217	1.77974	0.0884416
4	A4	28	67.0783	1.76808	0.0869777
4	A4	29	67.335	1.75773	0.0852856
4	A4	30	67.5916	1.74973	0.0837412
4	A4	31	67.8483	1.73583	0.0827058
4	A4	32	68.1049	1.72422	0.0823689
4	A4	33	68.3616	1.72112	0.0826283
4	A4	34	68.6183	1.70959	0.0830739
4	A4	35	68.8749	1.69731	0.0831144
4	A4	36	69.1316	1.68163	0.0822123
4	A4	37	69.3882	1.67219	0.0801193
4	A4	38	69.6449	1.65989	0.0769779
4	A4	39	69.9015	1.6497	0.0732247
4	A4	40	70.1582	1.64388	0.0693821
4	A4	41	70.4148	1.63857	0.0658637
4	A4	42	70.6715	1.62629	0.0629161
4	A4	43	70.9282	1.61863	0.0606767
4	A4	44	71.1848	1.61209	0.0592746
4	A4	45	71.4415	1.60514	0.0588538
4	A4	46	71.6981	1.59986	0.0595216
4	A4	47	71.9548	1.59299	0.0612584
4	A4	48	72.2114	1.58476	0.0638788
4	A4	49	72.4681	1.57809	0.067069
4	A4	50	72.7247	1.56417	0.0704736
4	A4	51	72.9814	1.56039	0.073779
4	A4	52	73.2381	1.54746	0.0767667
4	A4	53	73.4947	1.53735	0.0793205
4	A4	54	73.7514	1.52588	0.0814045
4	A4	55	74.008	1.51588	0.083028
4	A4	56	74.2647	1.5057	0.0842113
4	A4	57	74.5213	1.49532	0.0849773
4	A4	58	74.778	1.48114	0.0853708
4	A4	59	75.0347	1.47196	0.085482
4	A4	60	75.2913	1.45793	0.085443
4	A4	61	75.548	1.45298	0.0853853
4	A4	62	75.8046	1.43823	0.0853936
4	A4	63	76.0613	1.42828	0.0854921
4	A4	64	76.3179	1.41687	0.0856607
4	A4	65	76.5746	1.4068	0.0858633
4	A4	66	76.8312	1.39192	0.0860615
4	A4	67	77.0879	1.38757	0.0862104
4	A4	68	77.3446	1.37398	0.0862773
4	A4	69	77.6012	1.35995	0.0862813
4	A4	70	77.8579	1.34871	0.0863094
4	A4	71	78.1145	1.33876	0.086476
4	A4	72	78.3712	1.33004	0.0868289
4	A4	73	78.6278	1.3209	0.0872798
4	A4	74	78.8845	1.30566	0.0876488
4	A4	75	79.1412	1.29154	0.0877894
4	A4	76	79.3978	1.28042	0.0877105
4	A4	77	79.6545	1.2722	0.0876017
4	A4	78	79.9111	1.26049	0.0877503
4	A4	79	80.1678	1.24929	0.0884317
4	A4	80	80.4244	1.23708	0.0898379
4	A4	81	80.6811	1.2268	0.0920675
4	A4	82	80.9377	1.21554	0.095128
4	A4	83	81.1944	1.20192	0.0989282
4	A4	84	81.4511	1.19244	0.103273
4	A4	85	81.7077	1.17544	0.107923
4	A4	86	81.9644	1.16364	0.11276
4	A4	87	82.221	1.14548	0.118103
4	A4	88	82.4777	1.12772	0.125108
4	A4	89	82.7343	1.11465	0.136197
4	A4	90	82.991	1.09978	0.15533
4	A4	91	83.2477	1.08414	0.187868
4	A4	92	83.5043	1.06626	0.239678
4	A4	93	83.761	1.05077	0.315213
4	A4	94	84.0176	1.02745	0.414776
4	A4	95	84.2743	0.993608	0.531885
4	A4	96	84.5309	0.935335	0.652273
4	A4	97	84.7876	0.798755	0.755831
4	A4	98	85.0442	0.622687	0.82163
4	A4	99	85.3009	0.438083	0.834403
4	A4	100	85.5576	0.277157	0.78978
4	A4	101	85.8142	0.160849	0.695852
4	A4	102	86.0709	0.0980212	0.570365
4	A4	103	86.3275	0.0756001	0.434906
4	A4	104	86.5842	0.0675749	0.308681
4	A4	105	86.8408	0.0642777	0.20429
4	A4	106	87.0975	0.0623103	0.126553
4	A4	107	87.3541	0.0616645	0.0739711
4	A4	108	87.6108	0.0608204	0.04145
4	A4	109	87.8675	0.0595341	0.0229299
4	A4	110	88.1241	0.0593102	0.0131144
4	A4	111	88.3808	0.0583067	0.00817365
4	A4	112	88.6374	0.0580089	0.00571709
4	A4	113	88.8941	0.0577391	0.0044317
4	A4	114	89.1507	0.0572827	0.00367824
4	A4	115	89.4074	0.0566636	0.00318399
4	A4	116	89.664	0.0562618	0.00285236
4	A4	117	89.9207	0.0568314	0.00265735
4	A4	118	90.1774	0.0561105	0.00258603
4	A4	119	90.434	0.0560088	0.00261004
4	A4	120	90.6907	0.0552425	0.00268045
4	A4	121	90.9473	0.0549513	0.00274228
4	A4	122	91.204	0.0544881	0.0027568
4	A4	123	91.4606	0.0540877	0.0027168
4	A4	124	91.7173	0.053759	0.00264457
4	A4	125	91.974	0.0536887	0.00257341
4	A4	126	92.2306	0.0537128	0.00252412
4	A4	127	92.4873	0.0529022	0.00249112
4	A4	128	92.7439	0.0526699	0.00244654
4	A4	129	93.0006	0.0520559	0.00235813
4	A4	130	93.2572	0.0517553	0.00220685
4	A4	131	93.5139	0.051705	0.00199148
4	A4	132	93.7705	0.0521622	0.00172118
4	A4	133	94.0272	0.0512296	0.00140739
4	A4	134	94.2839	0.050464	0.00106549
4	A4	135	94.5405	0.0510143	0.000721997
4	A4	136	94.7972	0.0518177	0.000414725
5	A5	1	60.1486	2.18903	0.0966496
5	A5	2	60.4053	2.18324	0.0978449
5	A5	3	60.6619	2.16243	0.0987297
5	A5	4	60.9186	2.15271	0.0989845
5	A5	5	61.1752	2.14063	0.0984947
5	A5	6	61.4319	2.12825	0.0973874
5	A5	7	61.6885	2.11769	0.095977
5	A5	8	61.9452	2.09696	0.0946616
5	A5	9	62.2019	2.09365	0.0937985
5	A5	10	62.4585	2.08129	0.0935916
5	A5	11	62.7152	2.07279	0.0940425
5	A5	12	62.9718	2.0563	0.0949811
5	A5	13	63.2285	2.0439	0.0961621
5	A5	14	63.4851	2.03211	0.0973349
5	A5	15	63.7418	2.02248	0.098273
5	A5	16	63.9984	2.00742	0.098772
5	A5	17	64.2551	1.99602	0.0986742
5	A5	18	64.5118	1.97921	0.0979203
5	A5	19	64.7684	1.96627	0.0965909
5	A5	20	65.0251	1.95816	0.0948863
5	A5	21	65.2817	1.94605	0.0930583
5	A5	22	65.5384	1.92961	0.0913377
5	A5	23	65.795	1.92432	0.0898835
5	A5	24	66.0517	1.90872	0.088779
5	A5	25	66.3083	1.9017	0.0880311
5	A5	26	66.565	1.8886	0.0875941
5	A5	27	66.8217	1.87746	0.0873858
5	A5	28	67.0783	1.866	0.0873021
5	A5	29	67.335	1.85723	0.0872232
5	A5	30	67.5916	1.84512	0.0870204
5	A5	31	67.8483	1.83153	0.0865693
5	A5	32	68.1049	1.82186	0.0857769
5	A5	33	68.3616	1.81332	0.0846198
5	A5	34	68.6183	1.7997	0.08317
5	A5	35	68.8749	1.78633	0.0815733
5	A5	36	69.1316	1.77813	0.0799618
5	A5	37	69.3882	1.77377	0.0783489
5	A5	38	69.6449	1.76001	0.0765889
5	A5	39	69.9015	1.75141	0.0744641
5	A5	40	70.1582	1.73858	0.0718669
5	A5	41	70.4148	1.72592	0.0689477
5	A5	42	70.6715	1.72284	0.0661205
5	A5	43	70.9282	1.71695	0.0639082
5	A5	44	71.1848	1.70689	0.0627443
5	A5	45	71.4415	1.70215	0.0628366
5	A5	46	71.6981	1.69303	0.0641459
5	A5	47	71.9548	1.68695	0.0664527
5	A5	48	72.2114	1.67629	0.0694447
5	A5	49	72.4681	1.67167	0.0727921
5	A5	50	72.7247	1.65571	0.0761927
5	A5	51	72.9814	1.64976	0.0793934
5	A5	52	73.2381	1.63909	0.0821958
5	A5	53	73.4947	1.62666	0.0844601
5	A5	54	73.7514	1.61586	0.0861062
5	A5	55	74.008	1.60442	0.0871239
5	A5	56	74.2647	1.59243	0.0875671
5	A5	57	74.5213	1.58255	0.08754
5	A5	58	74.778	1.56816	0.0871759
5	A5	59	75.0347	1.56339	0.0866298
5	A5	60	75.2913	1.54619	0.0860791
5	A5	61	75.548	1.53774	0.08571
5	A5	62	75.8046	1.52396	0.0856775
5	A5	63	76.0613	1.52148	0.086053
5	A5	64	76.3179	1.50812	0.0868078
5	A5	65	76.5746	1.49291	0.0878429
5	A5	66	76.8312	1.481	0.089033
5	A5	67	77.0879	1.47236	0.0902326
5	A5	68	77.3446	1.46672	0.0912584
5	A5	69	77.6012	1.44759	0.0918982
5	A5	70	77.8579	1.43658	0.0920058
5	A5	71	78.1145	1.42091	0.0916055
5	A5	72	78.3712	1.41301	0.0909268
5	A5	73	78.6278	1.40059	0.0903133
5	A5	74	78.8845	1.39264	0.0900615
5	A5	75	79.1412	1.37915	0.0903118
5	A5	76	79.3978	1.36687	0.0910348
5	A5	77	79.6545	1.35684	0.0921115
5	A5	78	79.9111	1.34234	0.0934231
5	A5	79	80.1678	1.33322	0.0949046
5	A5	80	80.4244	1.31934	0.0965563
5	A5	81	80.6811	1.30701	0.0984249
5	A5	82	80.9377	1.29427	0.100577
5	A5	83	81.1944	1.28148	0.103072
5	A5	84	81.4511	1.2709	0.105945
5	A5	85	81.7077	1.25374	0.109235
5	A5	86	81.9644	1.24181	0.113105
5	A5	87	82.221	1.22739	0.118103
5	A5	88	82.4777	1.21032	0.125571
5	A5	89	82.7343	1.195	0.138111
5	A5	90	82.991	1.1794	0.159923
5	A5	91	83.2477	1.16587	0.196653
5	A5	92	83.5043	1.14803	0.254343
5	A5	93	83.761	1.13441	0.337265
5	A5	94	84.0176	1.10319	0.44498
5	A5	95	84.2743	1.07283	0.569706
5	A5	96	84.5309	1.00539	0.695631
5	A5	97	84.7876	0.85115	0.801391
5	A5	98	85.0442	0.666945	0.865588
5	A5	99	85.3009	0.480701	0.873463
5	A5	100	85.5576	0.322408	0.821893
5	A5	101	85.8142	0.204446	0.720443
5	A5	102	86.0709	0.140561	0.58807
5	A5	103	86.3275	0.117874	0.447042
5	A5	104	86.5842	0.109836	0.316742
5	A5	105	86.8408	0.106948	0.209599
5	A5	106	87.0975	0.104533	0.13012
5	A5	107	87.3541	0.102967	0.0764756
5	A5	108	87.6108	0.102558	0.0433079
5	A5	109	87.8675	0.100894	0.0243823
5	A5	110	88.1241	0.1003	0.01431
5	A5	111	88.3808	0.100125	0.00922176
5	A5	112	88.6374	0.0995139	0.00670667
5	A5	113	88.8941	0.0986507	0.00542844
5	A5	114	89.1507	0.0978166	0.00471768
5	A5	115	89.4074	0.0976998	0.0042696
5	A5	116	89.664	0.0975448	0.00395818
5	A5	117	89.9207	0.0966335	0.00373238
5	A5	118	90.1774	0.0966409	0.00356295
5	A5	119	90.434	0.0960242	0.00342368
5	A5	120	90.6907	0.0954205	0.00329488
5	A5	121	90.9473	0.0946427	0.00317388
5	A5	122	91.204	0.0949827	0.00307618
5	A5	123	91.4606	0.0948275	0.00302106
5	A5	124	91.7173	0.0943167	0.00301177
5	A5	125	91.974	0.0935666	0.00302623
5	A5	126	92.2306	0.0931222	0.00302709
5	A5	127	92.4873	0.0927312	0.00298395
5	A5	128	92.7439	0.0926797	0.00288951
5	A5	129	93.0006	0.0917052	0.00275845
5	A5	130	93.2572	0.0922448	0.00261021
5	A5	131	93.5139	0.0916957	0.00244992
5	A5	132	93.7705	0.0911133	0.00226126
5	A5	133	94.0272	0.0909908	0.0020173
5	A5	134	94.2839	0.0902476	0.00170176
5	A5	135	94.5405	0.0906535	0.0013265
5	A5	136	94.7972	0.0902894	0.000932214
6	A6	1	60.1486	2.06879	0.090559
6	A6	2	60.4053	2.06646	0.0913378
6	A6	3	60.6619	2.05654	0.0917892
6	A6	4	60.9186	2.03071	0.0916611
6	A6	5	61.1752	2.02492	0.0909564
6	A6	6	61.4319	2.01448	0.0899494
6	A6	7	61.6885	2.00268	0.0890503
6	A6	8	61.9452	1.98886	0.0886239
6	A6	9	62.2019	1.9813	0.0888378
6	A6	10	62.4585	1.9642	0.0896115
6	A6	11	62.7152	1.9611	0.0906654
6	A6	12	62.9718	1.94655	0.0916527
6	A6	13	63.2285	1.92463	0.092304
6	A6	14	63.4851	1.91743	0.0925179
6	A6	15	63.7418	1.90656	0.0923467
6	A6	16	63.9984	1.89334	0.0919053
6	A6	17	64.2551	1.88063	0.0912902
6	A6	18	64.5118	1.86932	0.0905688
6	A6	19	64.7684	1.85486	0.0898191
6	A6	20	65.0251	1.84261	0.0891436
6	A6	21	65.2817	1.83323	0.0886345
6	A6	22	65.5384	1.82274	0.0882972
6	A6	23	65.795	1.81094	0.0880266
6	A6	24	66.0517	1.79691	0.0876517
6	A6	25	66.3083	1.78446	0.0870186
6	A6	26	66.565	1.77245	0.0860534
6	A6	27	66.8217	1.76385	0.0847686
6	A6	28	67.0783	1.7514	0.0832384
6	A6	29	67.335	1.73864	0.0815812
6	A6	30	67.5916	1.72903	0.0799655
6	A6	31	67.8483	1.71668	0.0785946
6	A6	32	68.1049	1.70947	0.0776521
6	A6	33	68.3616	1.69919	0.0772176
6	A6	34	68.6183	1.68908	0.0771891
6	A6	35	68.8749	1.67911	0.0772658
6	A6	36	69.1316	1.66868	0.0770198
6	A6	37	69.3882	1.65761	0.0760276
6	A6	38	69.6449	1.64433	0.0740249
6	A6	39	69.9015	1.63677	0.0710144
6	A6	40	70.1582	1.61924	0.0672765
6	A6	41	70.4148	1.62008	0.0632918
6	A6	42	70.6715	1.61025	0.0596248
6	A6	43	70.9282	1.60418	0.0568143
6	A6	44	71.1848	1.58995	0.0552839
6	A6	45	71.4415	1.59097	0.0552652
6	A6	46	71.6981	1.58659	0.0567174
6	A6	47	71.9548	1.58165	0.0593321
6	A6	48	72.2114	1.56542	0.0626273
6	A6	49	72.4681	1.55685	0.0661201
6	A6	50	72.7247	1.55196	0.0694643
6	A6	51	72.9814	1.54177	0.072506
6	A6	52	73.2381	1.52975	0.0752424
6	A6	53	73.4947	1.51799	0.0777386
6	A6	54	73.7514	1.51002	0.080041
6	A6	55	74.008	1.49901	0.0821175
6	A6	56	74.2647	1.48788	0.0838427
6	A6	57	74.5213	1.4794	0.0850559
6	A6	58	74.778	1.45779	0.0856519
6	A6	59	75.0347	1.45147	0.0856599
6	A6	60	75.2913	1.44072	0.0852419
6	A6	61	75.548	1.43001	0.0846397
6	A6	62	75.8046	1.41739	0.0841157
6	A6	63	76.0613	1.40455	0.0839063
6	A6	64	76.3179	1.39668	0.084183
6	A6	65	76.5746	1.38384	0.0849865
6	A6	66	76.8312	1.37628	0.0861649
6	A6	67	77.0879	1.36427	0.0873752
6	A6	68	77.3446	1.351	0.0881941
6	A6	69	77.6012	1.33599	0.0883029
6	A6	70	77.8579	1.32254	0.0876428
6	A6	71	78.1145	1.31265	0.0864387
6	A6	72	78.3712	1.30067	0.0850846
6	A6	73	78.6278	1.29275	0.0839659
6	A6	74	78.8845	1.2798	0.0833279
6	A6	75	79.1412	1.26905	0.0832441
6	A6	76	79.3978	1.25723	0.0836713
6	A6	77	79.6545	1.24811	0.0845278
6	A6	78	79.9111	1.23325	0.0857508
6	A6	79	80.1678	1.22539	0.0873136
6	A6	80	80.4244	1.21262	0.0892281
6	A6	81	80.6811	1.19689	0.0915235
6	A6	82	80.9377	1.18991	0.0942228
6	A6	83	81.1944	1.17457	0.0973144
6	A6	84	81.4511	1.16373	0.100747
6	A6	85	81.7077	1.14652	0.104475
6	A6	86	81.9644	1.13303	0.108592
6	A6	87	82.221	1.12052	0.113591
6	A6	88	82.4777	1.10363	0.120765
6	A6	89	82.7343	1.08641	0.132677
6	A6	90	82.991	1.06786	0.153491
6	A6	91	83.2477	1.05691	0.18877
6	A6	92	83.5043	1.04158	0.244371
6	A6	93	83.761	1.02586	0.324277
6	A6	94	84.0176	0.998497	0.427794
6	A6	95	84.2743	0.964907	0.547197
6	A6	96	84.5309	0.881124	0.667257
6	A6	97	84.7876	0.741855	0.767691
6	A6	98	85.0442	0.555071	0.828334
6	A6	99	85.3009	0.36852	0.835321
6	A6	100	85.5576	0.205119	0.785735
6	A6	101	85.8142	0.0870546	0.688631
6	A6	102	86.0709	0.0239175	0.561993
6	A6	103	86.3275	0.000708657	0.427028
6	A6	104	86.5842	-0.00722501	0.302257
6	A6	105	86.8408	-0.0102928	0.199601
6	A6	106	87.0975	-0.0120313	0.123406
6	A6	107	87.3541	-0.013809	0.0719406
6	A6	108	87.6108	-0.0141489	0.0400824
6	A6	109	87.8675	-0.0144405	0.0218594
6	A6	110	88.1241	-0.0159361	0.0121089
6	A6	111	88.3808	-0.016436	0.00713058
6	A6	112	88.6374	-0.0158879	0.00463214
6	A6	113	88.8941	-0.0161008	0.00335315
6	A6	114	89.1507	-0.0167815	0.00265903
6	A6	115	89.4074	-0.0170852	0.00224424
6	A6	116	89.664	-0.0174036	0.00196634
6	A6	117	89.9207	-0.0177462	0.00177027
6	A6	118	90.1774	-0.0174003	0.00165001
6	A6	119	90.434	-0.0176408	0.00161524
6	A6	120	90.6907	-0.0177299	0.00165953
6	A6	121	90.9473	-0.0180159	0.00174356
6	A6	122	91.204	-0.0183639	0.00180412
6	A6	123	91.4606	-0.0196138	0.00178363
6	A6	124	91.7173	-0.0189892	0.00166105
6	A6	125	91.974	-0.0195413	0.00146335
6	A6	126	92.2306	-0.019337	0.0012502
6	A6	127	92.4873	-0.0190175	0.00108244
6	A6	128	92.7439	-0.0196524	0.000994145
6	A6	129	93.0006	-0.0196148	0.000983253
6	A6	130	93.2572	-0.0195563	0.00102101
6	A6	131	93.5139	-0.0204389	0.0010691
6	A6	132	93.7705	-0.0198598	0.00109242
6	A6	133	94.0272	-0.0201323	0.00106412
6	A6	134	94.2839	-0.0205318	0.000967829
6	A6	135	94.5405	-0.0208553	0.000802255
6	A6	136	94.7972	-0.0211676	0.000586194
7	A7	1	60.1486	2.05383	0.0875417
7	A7	2	60.4053	2.04056	0.0870509
7	A7	3	60.6619	2.0317	0.086298
7	A7	4	60.9186	2.01669	0.0855141
7	A7	5	61.1752	2.0121	0.085007
7	A7	6	61.4319	2.00245	0.085003
7	A7	7	61.6885	1.98793	0.085541
7	A7	8	61.9452	1.97816	0.0864804
7	A7	9	62.2019	1.96776	0.0875934
7	A7	10	62.4585	1.95071	0.0886612
7	A7	11	62.7152	1.94276	0.0895242
7	A7	12	62.9718	1.93423	0.0900885
7	A7	13	63.2285	1.91572	0.0903311
7	A7	14	63.4851	1.90481	0.0902971
7	A7	15	63.7418	1.89207	0.0900737
7	A7	16	63.9984	1.88221	0.0897231
7	A7	17	64.2551	1.87192	0.0892271
7	A7	18	64.5118	1.86077	0.0885039
7	A7	19	64.7684	1.84243	0.0874955
7	A7	20	65.0251	1.83238	0.0862603
7	A7	21	65.2817	1.82335	0.0849737
7	A7	22	65.5384	1.81279	0.083839
7	A7	23	65.795	1.80107	0.0829677
7	A7	24	66.0517	1.79257	0.082339
7	A7	25	66.3083	1.78011	0.0818357
7	A7	26	66.565	1.76696	0.0813251
7	A7	27	66.8217	1.75572	0.080695
7	A7	28	67.0783	1.74999	0.0798571
7	A7	29	67.335	1.74025	0.0787531
7	A7	30	67.5916	1.72228	0.0774033
7	A7	31	67.8483	1.71525	0.0759545
7	A7	32	68.1049	1.70162	0.0746533
7	A7	33	68.3616	1.69959	0.073704
7	A7	34	68.6183	1.68966	0.0731112
7	A7	35	68.8749	1.67809	0.0726177
7	A7	36	69.1316	1.66911	0.071798
7	A7	37	69.3882	1.65517	0.0702492
7	A7	38	69.6449	1.64636	0.0677635
7	A7	39	69.9015	1.64038	0.0643916
7	A7	40	70.1582	1.62633	0.0604045
7	A7	41	70.4148	1.62346	0.0562228
7	A7	42	70.6715	1.61497	0.0523499
7	A7	43	70.9282	1.60961	0.0493183
7	A7	44	71.1848	1.59987	0.0476085
7	A7	45	71.4415	1.60147	0.0475344
7	A7	46	71.6981	1.59531	0.0491251
7	A7	47	71.9548	1.5902	0.0520907
7	A7	48	72.2114	1.58248	0.055924
7	A7	49	72.4681	1.57288	0.060079
7	A7	50	72.7247	1.56152	0.0641568
7	A7	51	72.9814	1.55789	0.0679748
7	A7	52	73.2381	1.54492	0.0715203
7	A7	53	73.4947	1.53711	0.0748309
7	A7	54	73.7514	1.52733	0.077884
7	A7	55	74.008	1.51338	0.080546
7	A7	56	74.2647	1.50618	0.0825916
7	A7	57	74.5213	1.49514	0.0837884
7	A7	58	74.778	1.47723	0.0840066
7	A7	59	75.0347	1.46798	0.0833165
7	A7	60	75.2913	1.45821	0.0820207
7	A7	61	75.548	1.44485	0.0806056
7	A7	62	75.8046	1.43911	0.079616
7	A7	63	76.0613	1.42412	0.0794911
7	A7	64	76.3179	1.4173	0.0804043
7	A7	65	76.5746	1.41255	0.0821756
7	A7	66	76.8312	1.3962	0.0843215
7	A7	67	77.0879	1.38878	0.0862392
7	A7	68	77.3446	1.36777	0.0874525
7	A7	69	77.6012	1.35791	0.0877783
7	A7	70	77.8579	1.34592	0.0873168
7	A7	71	78.1145	1.34146	0.0863199
7	A7	72	78.3712	1.32326	0.0850456
7	A7	73	78.6278	1.31359	0.0837107
7	A7	74	78.8845	1.29826	0.08252
7	A7	75	79.1412	1.29508	0.081699
7	A7	76	79.3978	1.28054	0.0814654
7	A7	77	79.6545	1.26991	0.0819667
7	A7	78	79.9111	1.262	0.0832387
7	A7	79	80.1678	1.2513	0.0852397
7	A7	80	80.4244	1.23677	0.0879366
7	A7	81	80.6811	1.22218	0.0913748
7	A7	82	80.9377	1.21769	0.0956658
7	A7	83	81.1944	1.20177	0.100884
7	A7	84	81.4511	1.18879	0.106927
7	A7	85	81.7077	1.17409	0.113455
7	A7	86	81.9644	1.15964	0.120029
7	A7	87	82.221	1.14416	0.126524
7	A7	88	82.4777	1.11958	0.13378
7	A7	89	82.7343	1.09786	0.144297
7	A7	90	82.991	1.08083	0.16259
7	A7	91	83.2477	1.06947	0.194815
7	A7	92	83.5043	1.05884	0.247357
7	A7	93	83.761	1.04211	0.324443
7	A7	94	84.0176	1.01308	0.42532
7	A7	95	84.2743	0.977355	0.542036
7	A7	96	84.5309	0.898014	0.659162
7	A7	97	84.7876	0.763188	0.75637
7	A7	98	85.0442	0.578543	0.813651
7	A7	99	85.3009	0.392298	0.817498
7	A7	100	85.5576	0.235435	0.765491
7	A7	101	85.8142	0.123227	0.667189
7	A7	102	86.0709	0.0684315	0.540896
7	A7	103	86.3275	0.0483566	0.407802
7	A7	104	86.5842	0.0419789	0.286048
7	A7	105	86.8408	0.0392307	0.186944
7	A7	106	87.0975	0.0383012	0.114213
7	A7	107	87.3541	0.0367483	0.0656813
7	A7	108	87.6108	0.0363013	0.0360427
7	A7	109	87.8675	0.0352067	0.0193636
7	A7	110	88.1241	0.0357027	0.0106396
7	A7	111	88.3808	0.0349642	0.0063432
7	A7	112	88.6374	0.0344501	0.00430762
7	A7	113	88.8941	0.0344628	0.00334333
7	A7	114	89.1507	0.0333496	0.00285862
7	A7	115	89.4074	0.0337329	0.00258744
7	A7	116	89.664	0.0331199	0.00242374
7	A7	117	89.9207	0.0332327	0.00232677
7	A7	118	90.1774	0.0330134	0.00227102
7	A7	119	90.434	0.0321744	0.00222806
7	A7	120	90.6907	0.031796	0.00217043
7	A7	121	90.9473	0.0319492	0.00208348
7	A7	122	91.204	0.0313448	0.00197069
7	A7	123	91.4606	0.0314331	0.00184683
7	A7	124	91.7173	0.0312276	0.00172592
7	A7	125	91.974	0.0310853	0.0016154
7	A7	126	92.2306	0.0304316	0.00152097
7	A7	127	92.4873	0.0300816	0.00145436
7	A7	128	92.7439	0.0307135	0.00143194
7	A7	129	93.0006	0.0307327	0.00146146
7	A7	130	93.2572	0.03035	0.00152817
7	A7	131	93.5139	0.029213	0.00159444
7	A7	132	93.7705	0.0290525	0.00161516
7	A7	133	94.0272	0.0297502	0.00155654
7	A7	134	94.2839	0.0293243	0.00140602
7	A7	135	94.5405	0.0286478	0.00117244
7	A7	136	94.7972	0.0278612	0.000882888
8	A8	1	60.1486	1.99864	0.0847248
8	A8	2	60.4053	1.98898	0.0846452
8	A8	3	60.6619	1.97806	0.0846212
8	A8	4	60.9186	1.96918	0.0846594
8	A8	5	61.1752	1.96282	0.0847147
8	A8	6	61.4319	1.94473	0.0847192
8	A8	7	61.6885	1.93759	0.0846645
8	A8	8	61.9452	1.91987	0.0846714
8	A8	9	62.2019	1.91016	0.0849582
8	A8	10	62.4585	1.90432	0.085693
8	A8	11	62.7152	1.89179	0.0868424
8	A8	12	62.9718	1.88292	0.0881211
8	A8	13	63.2285	1.86438	0.0891241
8	A8	14	63.4851	1.8547	0.0895367
8	A8	15	63.7418	1.83878	0.0892918
8	A8	16	63.9984	1.8283	0.0885693
8	A8	17	64.2551	1.81777	0.0876629
8	A8	18	64.5118	1.80688	0.0868031
8	A8	19	64.7684	1.7944	0.0860646
8	A8	20	65.0251	1.78586	0.0853851
8	A8	21	65.2817	1.76867	0.0846552
8	A8	22	65.5384	1.75975	0.0838071
8	A8	23	65.795	1.74943	0.082844
8	A8	24	66.0517	1.73848	0.0818146
8	A8	25	66.3083	1.72667	0.0807712
8	A8	26	66.565	1.71681	0.0797354
8	A8	27	66.8217	1.70334	0.0786852
8	A8	28	67.0783	1.69665	0.0775602
8	A8	29	67.335	1.68864	0.0762973
8	A8	30	67.5916	1.67052	0.0748844
8	A8	31	67.8483	1.66344	0.073401
8	A8	32	68.1049	1.65416	0.072001
8	A8	33	68.3616	1.64755	0.0708299
8	A8	34	68.6183	1.63575	0.069927
8	A8	35	68.8749	1.62786	0.0691773
8	A8	36	69.1316	1.61833	0.0683412
8	A8	37	69.3882	1.60934	0.0671555
8	A8	38	69.6449	1.59655	0.0654399
8	A8	39	69.9015	1.59243	0.0631728
8	A8	40	70.1582	1.57715	0.0604934
8	A8	41	70.4148	1.57401	0.0576553
8	A8	42	70.6715	1.56904	0.0549604
8	A8	43	70.9282	1.55749	0.0527177
8	A8	44	71.1848	1.55352	0.0512206
8	A8	45	71.4415	1.54496	0.0507221
8	A8	46	71.6981	1.54115	0.0513743
8	A8	47	71.9548	1.53802	0.0531624
8	A8	48	72.2114	1.52845	0.0558909
8	A8	49	72.4681	1.5228	0.059241
8	A8	50	72.7247	1.50831	0.0628789
8	A8	51	72.9814	1.50455	0.0665341
8	A8	52	73.2381	1.49647	0.0700104
8	A8	53	73.4947	1.48318	0.0731487
8	A8	54	73.7514	1.47406	0.0757927
8	A8	55	74.008	1.46423	0.0777996
8	A8	56	74.2647	1.45192	0.0790903
8	A8	57	74.5213	1.43997	0.0797009
8	A8	58	74.778	1.43056	0.0798025
8	A8	59	75.0347	1.41659	0.0796596
8	A8	60	75.2913	1.41008	0.0795444
8	A8	61	75.548	1.39926	0.0796464
8	A8	62	75.8046	1.38958	0.0800285
8	A8	63	76.0613	1.37495	0.0806339
8	A8	64	76.3179	1.36818	0.0813385
8	A8	65	76.5746	1.35465	0.0820134
8	A8	66	76.8312	1.34634	0.0825711
8	A8	67	77.0879	1.33237	0.0829878
8	A8	68	77.3446	1.31865	0.0832895
8	A8	69	77.6012	1.31289	0.0835085
8	A8	70	77.8579	1.30114	0.0836398
8	A8	71	78.1145	1.28775	0.0836349
8	A8	72	78.3712	1.2749	0.0834492
8	A8	73	78.6278	1.26772	0.0831103
8	A8	74	78.8845	1.24925	0.0827451
8	A8	75	79.1412	1.24446	0.0825415
8	A8	76	79.3978	1.23286	0.0826688
8	A8	77	79.6545	1.22188	0.0832163
8	A8	78	79.9111	1.20943	0.0842023
8	A8	79	80.1678	1.19839	0.0856336
8	A8	80	80.4244	1.18483	0.0875677
8	A8	81	80.6811	1.17718	0.0901355
8	A8	82	80.9377	1.16431	0.0935051
8	A8	83	81.1944	1.14984	0.0978143
8	A8	84	81.4511	1.13651	0.103075
8	A8	85	81.7077	1.12717	0.109117
8	A8	86	81.9644	1.11034	0.115653
8	A8	87	82.221	1.09504	0.122571
8	A8	88	82.4777	1.07468	0.130502
8	A8	89	82.7343	1.05048	0.141502
8	A8	90	82.991	1.0339	0.159524
8	A8	91	83.2477	1.02039	0.190223
8	A8	92	83.5043	1.00667	0.239794
8	A8	93	83.761	0.991789	0.312759
8	A8	94	84.0176	0.964949	0.409176
8	A8	95	84.2743	0.928967	0.522257
8	A8	96	84.5309	0.857626	0.637735
8	A8	97	84.7876	0.728946	0.736016
8	A8	98	85.0442	0.549901	0.797085
8	A8	99	85.3009	0.360637	0.806641
8	A8	100	85.5576	0.200446	0.760947
8	A8	101	85.8142	0.083798	0.668205
8	A8	102	86.0709	0.0230239	0.545769
8	A8	103	86.3275	0.00179614	0.414516
8	A8	104	86.5842	-0.00540443	0.292864
8	A8	105	86.8408	-0.00849743	0.192737
8	A8	106	87.0975	-0.0100607	0.11852
8	A8	107	87.3541	-0.0107421	0.0685438
8	A8	108	87.6108	-0.011955	0.0377635
8	A8	109	87.8675	-0.0121933	0.0203037
8	A8	110	88.1241	-0.0125323	0.0110913
8	A8	111	88.3808	-0.0132008	0.00648981
8	A8	112	88.6374	-0.0132957	0.00424157
8	A8	113	88.8941	-0.014275	0.00310938
8	A8	114	89.1507	-0.0136898	0.00249243
8	A8	115	89.4074	-0.0143249	0.00213482
8	A8	116	89.664	-0.014341	0.00194082
8	A8	117	89.9207	-0.0146296	0.00187081
8	A8	118	90.1774	-0.0144315	0.00189059
8	A8	119	90.434	-0.0150796	0.00195523
8	A8	120	90.6907	-0.015646	0.00201478
8	A8	121	90.9473	-0.0159518	0.00202942
8	A8	122	91.204	-0.0158264	0.00198209
8	A8	123	91.4606	-0.0164255	0.0018809
8	A8	124	91.7173	-0.0167702	0.00175073
8	A8	125	91.974	-0.0164359	0.00162025
8	A8	126	92.2306	-0.0166321	0.00151164
8	A8	127	92.4873	-0.0173751	0.00143719
8	A8	128	92.7439	-0.0172804	0.00140071
8	A8	129	93.0006	-0.0171156	0.00139882
8	A8	130	93.2572	-0.0174781	0.00141894
8	A8	131	93.5139	-0.0179451	0.0014363
8	A8	132	93.7705	-0.0176389	0.00141636
8	A8	133	94.0272	-0.0185821	0.00132613
8	A8	134	94.2839	-0.0185903	0.00115042
8	A8	135	94.5405	-0.0187255	0.000902884
8	A8	136	94.7972	-0.0186462	0.000623534
9	A9	1	60.1486	2.03547	0.0857791
9	A9	2	60.4053	2.01872	0.0862004
9	A9	3	60.6619	2.00886	0.0864367
9	A9	4	60.9186	2.00033	0.0863839
9	A9	5	61.1752	1.99162	0.0860394
9	A9	6	61.4319	1.97283	0.085527
9	A9	7	61.6885	1.96537	0.0850806
9	A9	8	61.9452	1.95172	0.0849727
9	A9	9	62.2019	1.94138	0.0853857
9	A9	10	62.4585	1.93422	0.0862826
9	A9	11	62.7152	1.92366	0.0873814
9	A9	12	62.9718	1.90974	0.088271
9	A9	13	63.2285	1.89011	0.0886181
9	A9	14	63.4851	1.8831	0.0883182
9	A9	15	63.7418	1.86963	0.0875082
9	A9	16	63.9984	1.85976	0.0864575
9	A9	17	64.2551	1.85067	0.085427
9	A9	18	64.5118	1.83022	0.0845881
9	A9	19	64.7684	1.8279	0.0840083
9	A9	20	65.0251	1.81691	0.0836801
9	A9	21	65.2817	1.79979	0.083552
9	A9	22	65.5384	1.79202	0.0835517
9	A9	23	65.795	1.78152	0.0835907
9	A9	24	66.0517	1.76852	0.083563
9	A9	25	66.3083	1.75922	0.0833509
9	A9	26	66.565	1.74589	0.0828429
9	A9	27	66.8217	1.73568	0.0819599
9	A9	28	67.0783	1.72003	0.080678
9	A9	29	67.335	1.71767	0.0790362
9	A9	30	67.5916	1.70047	0.077144
9	A9	31	67.8483	1.68993	0.0751877
9	A9	32	68.1049	1.68335	0.0734081
9	A9	33	68.3616	1.67096	0.0720313
9	A9	34	68.6183	1.66281	0.0711592
9	A9	35	68.8749	1.65759	0.0706832
9	A9	36	69.1316	1.64749	0.070282
9	A9	37	69.3882	1.63431	0.0695263
9	A9	38	69.6449	1.6203	0.0680327
9	A9	39	69.9015	1.61974	0.0656016
9	A9	40	70.1582	1.60459	0.0622942
9	A9	41	70.4148	1.59705	0.0584495
9	A9	42	70.6715	1.58975	0.054639
9	A9	43	70.9282	1.57869	0.0515393
9	A9	44	71.1848	1.57958	0.0497369
9	A9	45	71.4415	1.57855	0.0495456
9	A9	46	71.6981	1.56885	0.0509256
9	A9	47	71.9548	1.55647	0.0535517
9	A9	48	72.2114	1.55827	0.0569811
9	A9	49	72.4681	1.54382	0.0608038
9	A9	50	72.7247	1.53853	0.0647182
9	A9	51	72.9814	1.528	0.0685294
9	A9	52	73.2381	1.5177	0.0721038
9	A9	53	73.4947	1.50978	0.0753269
9	A9	54	73.7514	1.49638	0.0780925
9	A9	55	74.008	1.48897	0.080317
9	A9	56	74.2647	1.47453	0.0819804
9	A9	57	74.5213	1.46046	0.0831401
9	A9	58	74.778	1.4543	0.0839085
9	A9	59	75.0347	1.44113	0.0843854
9	A9	60	75.2913	1.42915	0.0846073
9	A9	61	75.548	1.42031	0.0845498
9	A9	62	75.8046	1.40456	0.0841946
9	A9	63	76.0613	1.39548	0.0836082
9	A9	64	76.3179	1.38018	0.0829648
9	A9	65	76.5746	1.3743	0.082489
9	A9	66	76.8312	1.36304	0.0823523
9	A9	67	77.0879	1.3524	0.0825972
9	A9	68	77.3446	1.34034	0.0831403
9	A9	69	77.6012	1.32838	0.0838426
9	A9	70	77.8579	1.31885	0.0845907
9	A9	71	78.1145	1.30516	0.0853276
9	A9	72	78.3712	1.29247	0.0860162
9	A9	73	78.6278	1.28534	0.0865808
9	A9	74	78.8845	1.27123	0.0868894
9	A9	75	79.1412	1.26058	0.0868218
9	A9	76	79.3978	1.2424	0.0863841
9	A9	77	79.6545	1.23117	0.0857841
9	A9	78	79.9111	1.22576	0.0854074
9	A9	79	80.1678	1.21124	0.0856911
9	A9	80	80.4244	1.20241	0.0869932
9	A9	81	80.6811	1.19003	0.0895222
9	A9	82	80.9377	1.1783	0.0933339
9	A9	83	81.1944	1.1648	0.0983392
9	A9	84	81.4511	1.1536	0.104294
9	A9	85	81.7077	1.14122	0.11081
9	A9	86	81.9644	1.12313	0.117495
9	A9	87	82.221	1.10527	0.124303
9	A9	88	82.4777	1.08475	0.132083
9	A9	89	82.7343	1.06659	0.143176
9	A9	90	82.991	1.04816	0.161766
9	A9	91	83.2477	1.03251	0.193642
9	A9	92	83.5043	1.01714	0.245029
9	A9	93	83.761	1.00217	0.320408
9	A9	94	84.0176	0.980082	0.41971
9	A9	95	84.2743	0.935939	0.535901
9	A9	96	84.5309	0.865667	0.65435
9	A9	97	84.7876	0.731955	0.755047
9	A9	98	85.0442	0.544861	0.817616
9	A9	99	85.3009	0.354972	0.827538
9	A9	100	85.5576	0.190507	0.781041
9	A9	101	85.8142	0.0697087	0.686447
9	A9	102	86.0709	0.00480709	0.561359
9	A9	103	86.3275	-0.0175791	0.426997
9	A9	104	86.5842	-0.0255254	0.302155
9	A9	105	86.8408	-0.0282253	0.199111
9	A9	106	87.0975	-0.0301508	0.122499
9	A9	107	87.3541	-0.0305662	0.0707578
9	A9	108	87.6108	-0.0311948	0.0388129
9	A9	109	87.8675	-0.0320186	0.0206652
9	A9	110	88.1241	-0.0324552	0.0110907
9	A9	111	88.3808	-0.0327405	0.00632749
9	A9	112	88.6374	-0.0331963	0.00404159
9	A9	113	88.8941	-0.0331576	0.00296029
9	A9	114	89.1507	-0.033426	0.00246247
9	A9	115	89.4074	-0.0333939	0.0022645
9	A9	116	89.664	-0.0342577	0.00222971
9	A9	117	89.9207	-0.0342512	0.00227491
9	A9	118	90.1774	-0.0344946	0.00233603
9	A9	119	90.434	-0.0349133	0.00236265
9	A9	120	90.6907	-0.0357961	0.00232369
9	A9	121	90.9473	-0.0356584	0.00221366
9	A9	122	91.204	-0.036401	0.0020522
9	A9	123	91.4606	-0.0357019	0.0018741
9	A9	124	91.7173	-0.0363465	0.00171412
9	A9	125	91.974	-0.0366489	0.00159517
9	A9	126	92.2306	-0.036904	0.00152466
9	A9	127	92.4873	-0.0368658	0.00149704
9	A9	128	92.7439	-0.036741	0.00149737
9	A9	129	93.0006	-0.0372276	0.00150445
9	A9	130	93.2572	-0.0381574	0.0014955
9	A9	131	93.5139	-0.0375546	0.00145201
9	A9	132	93.7705	-0.0379591	0.0013635
9	A9	133	94.0272	-0.0379925	0.0012269
9	A9	134	94.2839	-0.0384047	0.00104473
9	A9	135	94.5405	-0.0385672	0.000826244
9	A9	136	94.7972	-0.0387529	0.000590453
10	A10	1	60.1486	1.92021	0.0872193
10	A10	2	60.4053	1.91513	0.0878905
10	A10	3	60.6619	1.8988	0.0886773
10	A10	4	60.9186	1.88801	0.089463
10	A10	5	61.1752	1.8779	0.0901363
10	A10	6	61.4319	1.8676	0.0905857
10	A10	7	61.6885	1.85385	0.0907003
10	A10	8	61.9452	1.84044	0.0904213
10	A10	9	62.2019	1.82281	0.0897917
10	A10	10	62.4585	1.81782	0.0889601
10	A10	11	62.7152	1.80566	0.0881249
10	A10	12	62.9718	1.79179	0.0874674
10	A10	13	63.2285	1.78124	0.0871015
10	A10	14	63.4851	1.76846	0.087058
10	A10	15	63.7418	1.7561	0.0872715
10	A10	16	63.9984	1.75141	0.0875848
10	A10	17	64.2551	1.73427	0.0877917
10	A10	18	64.5118	1.72111	0.0877158
10	A10	19	64.7684	1.70666	0.0872841
10	A10	20	65.0251	1.70065	0.0865415
10	A10	21	65.2817	1.68786	0.085602
10	A10	22	65.5384	1.67412	0.0845963
10	A10	23	65.795	1.66356	0.0836477
10	A10	24	66.0517	1.65436	0.0828898
10	A10	25	66.3083	1.64126	0.0824722
10	A10	26	66.565	1.63109	0.0825159
10	A10	27	66.8217	1.61901	0.083026
10	A10	28	67.0783	1.61437	0.0838131
10	A10	29	67.335	1.59975	0.0845053
10	A10	30	67.5916	1.58614	0.0846758
10	A10	31	67.8483	1.57372	0.0840421
10	A10	32	68.1049	1.56173	0.082619
10	A10	33	68.3616	1.54959	0.0807171
10	A10	34	68.6183	1.5377	0.0787603
10	A10	35	68.8749	1.5332	0.0770282
10	A10	36	69.1316	1.52519	0.0754807
10	A10	37	69.3882	1.51362	0.0737797
10	A10	38	69.6449	1.49624	0.0714959
10	A10	39	69.9015	1.48915	0.0683554
10	A10	40	70.1582	1.47938	0.0643848
10	A10	41	70.4148	1.47441	0.0599089
10	A10	42	70.6715	1.4631	0.0554562
10	A10	43	70.9282	1.45766	0.0516614
10	A10	44	71.1848	1.45145	0.0491702
10	A10	45	71.4415	1.44745	0.0485194
10	A10	46	71.6981	1.44076	0.0499785
10	A10	47	71.9548	1.44209	0.0534178
10	A10	48	72.2114	1.43204	0.0582893
10	A10	49	72.4681	1.42502	0.0637869
10	A10	50	72.7247	1.41001	0.0691082
10	A10	51	72.9814	1.4007	0.0736859
10	A10	52	73.2381	1.38975	0.0772724
10	A10	53	73.4947	1.38149	0.0798707
10	A10	54	73.7514	1.37065	0.081608
10	A10	55	74.008	1.35437	0.082643
10	A10	56	74.2647	1.34602	0.0831443
10	A10	57	74.5213	1.33457	0.0833035
10	A10	58	74.778	1.32339	0.0833225
10	A10	59	75.0347	1.31159	0.0833667
10	A10	60	75.2913	1.30062	0.0835128
10	A10	61	75.548	1.29398	0.0837354
10	A10	62	75.8046	1.277	0.0839487
10	A10	63	76.0613	1.26851	0.0840844
10	A10	64	76.3179	1.25303	0.0841384
10	A10	65	76.5746	1.24486	0.084161
10	A10	66	76.8312	1.23564	0.0842
10	A10	67	77.0879	1.22417	0.0842544
10	A10	68	77.3446	1.2097	0.0842804
10	A10	69	77.6012	1.1965	0.0842376
10	A10	70	77.8579	1.19225	0.0841341
10	A10	71	78.1145	1.17522	0.0840279
10	A10	72	78.3712	1.16497	0.0839993
10	A10	73	78.6278	1.15415	0.0841138
10	A10	74	78.8845	1.14508	0.0844083
10	A10	75	79.1412	1.13049	0.0848957
10	A10	76	79.3978	1.11997	0.0855861
10	A10	77	79.6545	1.10785	0.086489
10	A10	78	79.9111	1.09611	0.0876066
10	A10	79	80.1678	1.08842	0.0889316
10	A10	80	80.4244	1.07107	0.09047
10	A10	81	80.6811	1.05931	0.0922821
10	A10	82	80.9377	1.04634	0.094499
10	A10	83	81.1944	1.03813	0.0972822
10	A10	84	81.4511	1.022	0.10074
10	A10	85	81.7077	1.00912	0.104863
10	A10	86	81.9644	0.996887	0.109585
10	A10	87	82.221	0.980229	0.115036
10	A10	88	82.4777	0.963215	0.12201
10	A10	89	82.7343	0.9454	0.132534
10	A10	90	82.991	0.925376	0.150324
10	A10	91	83.2477	0.914408	0.180745
10	A10	92	83.5043	0.900185	0.229926
10	A10	93	83.761	0.880499	0.302785
10	A10	94	84.0176	0.86058	0.400254
10	A10	95	84.2743	0.826145	0.5166
10	A10	96	84.5309	0.768804	0.638303
10	A10	97	84.7876	0.632977	0.745745
10	A10	98	85.0442	0.453511	0.817912
10	A10	99	85.3009	0.263552	0.838681
10	A10	100	85.5576	0.0918242	0.802173
10	A10	101	85.8142	-0.0390908	0.714782
10	A10	102	86.0709	-0.115205	0.592966
10	A10	103	86.3275	-0.144728	0.457886
10	A10	104	86.5842	-0.154424	0.329249
10	A10	105	86.8408	-0.158285	0.220752
10	A10	106	87.0975	-0.160313	0.138429
10	A10	107	87.3541	-0.161865	0.0817024
10	A10	108	87.6108	-0.162605	0.0459461
10	A10	109	87.8675	-0.163143	0.0251761
10	A10	110	88.1241	-0.164163	0.0139444
10	A10	111	88.3808	-0.164447	0.00819941
10	A10	112	88.6374	-0.164717	0.00535252
10	A10	113	88.8941	-0.165091	0.00394627
10	A10	114	89.1507	-0.165391	0.00324309
10	A10	115	89.4074	-0.165986	0.00289593
10	A10	116	89.664	-0.165721	0.00273925
10	A10	117	89.9207	-0.16638	0.0026795
10	A10	118	90.1774	-0.166706	0.0026511
10	A10	119	90.434	-0.167493	0.0026088
10	A10	120	90.6907	-0.167888	0.00253293
10	A10	121	90.9473	-0.167536	0.00242951
10	A10	122	91.204	-0.168399	0.00231789
10	A10	123	91.4606	-0.168054	0.00221191
10	A10	124	91.7173	-0.168548	0.00210823
10	A10	125	91.974	-0.169336	0.00199095
10	A10	126	92.2306	-0.169588	0.00184815
10	A10	127	92.4873	-0.169128	0.00168642
10	A10	128	92.7439	-0.169894	0.001531
10	A10	129	93.0006	-0.169684	0.0014112
10	A10	130	93.2572	-0.169576	0.00134157
10	A10	131	93.5139	-0.170048	0.00131147
10	A10	132	93.7705	-0.170565	0.00128869
10	A10	133	94.0272	-0.170473	0.00123399
10	A10	134	94.2839	-0.170293	0.00111826
10	A10	135	94.5405	-0.171358	0.000934978
10	A10	136	94.7972	-0.171192	0.000703261
11	A11	1	60.1486	2.09086	0.0908748
11	A11	2	60.4053	2.0803	0.0914921
11	A11	3	60.6619	2.06602	0.0919427
11	A11	4	60.9186	2.05318	0.0921421
11	A11	5	61.1752	2.04344	0.0921561
11	A11	6	61.4319	2.03327	0.0921358
11	A11	7	61.6885	2.01802	0.0922081
11	A11	8	61.9452	2.00544	0.0923881
11	A11	9	62.2019	1.99621	0.0925646
11	A11	10	62.4585	1.98573	0.0925682
11	A11	11	62.7152	1.96766	0.0922787
11	A11	12	62.9718	1.95234	0.0916926
11	A11	13	63.2285	1.94739	0.0909192
11	A11	14	63.4851	1.93355	0.0901013
11	A11	15	63.7418	1.92106	0.0893341
11	A11	16	63.9984	1.90838	0.0886316
11	A11	17	64.2551	1.89698	0.0879539
11	A11	18	64.5118	1.88808	0.087262
11	A11	19	64.7684	1.87238	0.0865506
11	A11	20	65.0251	1.86016	0.0858418
11	A11	21	65.2817	1.85525	0.0851513
11	A11	22	65.5384	1.83924	0.0844623
11	A11	23	65.795	1.82837	0.0837329
11	A11	24	66.0517	1.81909	0.0829383
11	A11	25	66.3083	1.80576	0.0821111
11	A11	26	66.565	1.79435	0.081337
11	A11	27	66.8217	1.78682	0.0806991
11	A11	28	67.0783	1.77321	0.0802109
11	A11	29	67.335	1.7688	0.0797913
11	A11	30	67.5916	1.75238	0.0793136
11	A11	31	67.8483	1.74155	0.0786958
11	A11	32	68.1049	1.73082	0.0779559
11	A11	33	68.3616	1.72176	0.0771831
11	A11	34	68.6183	1.71497	0.0764523
11	A11	35	68.8749	1.70155	0.0757404
11	A11	36	69.1316	1.69086	0.074903
11	A11	37	69.3882	1.6813	0.0737154
11	A11	38	69.6449	1.67579	0.0719526
11	A11	39	69.9015	1.65755	0.0694817
11	A11	40	70.1582	1.6528	0.06633
11	A11	41	70.4148	1.64158	0.0627166
11	A11	42	70.6715	1.63679	0.0590241
11	A11	43	70.9282	1.62493	0.0557206
11	A11	44	71.1848	1.62346	0.0532512
11	A11	45	71.4415	1.61605	0.0519401
11	A11	46	71.6981	1.60825	0.0519383
11	A11	47	71.9548	1.60716	0.053232
11	A11	48	72.2114	1.59756	0.0556943
11	A11	49	72.4681	1.58657	0.0591321
11	A11	50	72.7247	1.58371	0.0632909
11	A11	51	72.9814	1.57343	0.0678207
11	A11	52	73.2381	1.56833	0.0722668
11	A11	53	73.4947	1.55439	0.0761395
11	A11	54	73.7514	1.54025	0.0790649
11	A11	55	74.008	1.5271	0.0809188
11	A11	56	74.2647	1.52259	0.0818698
11	A11	57	74.5213	1.5069	0.0822961
11	A11	58	74.778	1.49674	0.082626
11	A11	59	75.0347	1.4867	0.0831703
11	A11	60	75.2913	1.47653	0.0840152
11	A11	61	75.548	1.46923	0.0850043
11	A11	62	75.8046	1.45218	0.0858342
11	A11	63	76.0613	1.44134	0.0862109
11	A11	64	76.3179	1.42909	0.0860122
11	A11	65	76.5746	1.41639	0.0853589
11	A11	66	76.8312	1.40624	0.0845604
11	A11	67	77.0879	1.39539	0.083965
11	A11	68	77.3446	1.38568	0.0837965
11	A11	69	77.6012	1.37632	0.084066
11	A11	70	77.8579	1.36502	0.0846121
11	A11	71	78.1145	1.35068	0.0852347
11	A11	72	78.3712	1.33786	0.0858259
11	A11	73	78.6278	1.32788	0.0864153
11	A11	74	78.8845	1.31807	0.0871031
11	A11	75	79.1412	1.30684	0.0879365
11	A11	76	79.3978	1.29272	0.0888422
11	A11	77	79.6545	1.28228	0.0896567
11	A11	78	79.9111	1.2697	0.0902433
11	A11	79	80.1678	1.25297	0.0906215
11	A11	80	80.4244	1.24482	0.0910232
11	A11	81	80.6811	1.23123	0.0918379
11	A11	82	80.9377	1.2208	0.0934656
11	A11	83	81.1944	1.20929	0.0961475
11	A11	84	81.4511	1.19983	0.0998592
11	A11	85	81.7077	1.18347	0.104338
11	A11	86	81.9644	1.1671	0.109271
11	A11	87	82.221	1.15468	0.114646
11	A11	88	82.4777	1.13815	0.121242
11	A11	89	82.7343	1.11888	0.131159
11	A11	90	82.991	1.10021	0.148208
11	A11	91	83.2477	1.08725	0.177825
11	A11	92	83.5043	1.07753	0.226155
11	A11	93	83.761	1.05843	0.298114
11	A11	94	84.0176	1.03783	0.39468
11	A11	95	84.2743	1.00176	0.510302
11	A11	96	84.5309	0.947682	0.631788
11	A11	97	84.7876	0.815909	0.739895
11	A11	98	85.0442	0.642868	0.813823
11	A11	99	85.3009	0.454076	0.837328
11	A11	100	85.5576	0.285327	0.804036
11	A11	101	85.8142	0.152191	0.719627
11	A11	102	86.0709	0.0733583	0.599901
11	A11	103	86.3275	0.0411554	0.465655
11	A11	104	86.5842	0.0306661	0.336628
11	A11	105	86.8408	0.0261357	0.226878
11	A11	106	87.0975	0.0245324	0.14293
11	A11	107	87.3541	0.0235072	0.0846356
11	A11	108	87.6108	0.0224938	0.047628
11	A11	109	87.8675	0.0212095	0.0259939
11	A11	110	88.1241	0.0215846	0.0142305
11	A11	111	88.3808	0.0202646	0.0081829
11	A11	112	88.6374	0.0203753	0.00516508
11	A11	113	88.8941	0.0202335	0.003651
11	A11	114	89.1507	0.0200187	0.00286317
11	A11	115	89.4074	0.0186557	0.00243538
11	A11	116	89.664	0.0200063	0.00219675
11	A11	117	89.9207	0.0196068	0.0020584
11	A11	118	90.1774	0.0179031	0.00196733
11	A11	119	90.434	0.0184102	0.001895
11	A11	120	90.6907	0.018417	0.00183484
11	A11	121	90.9473	0.0182939	0.00179366
11	A11	122	91.204	0.0180227	0.00177608
11	A11	123	91.4606	0.0173557	0.00177214
11	A11	124	91.7173	0.0174288	0.00175785
11	A11	125	91.974	0.0172658	0.00170826
11	A11	126	92.2306	0.0164313	0.00161387
11	A11	127	92.4873	0.016848	0.00148977
11	A11	128	92.7439	0.0162234	0.00137112
11	A11	129	93.0006	0.0164247	0.00129572
11	A11	130	93.2572	0.0171319	0.00128188
11	A11	131	93.5139	0.015763	0.00131413
11	A11	132	93.7705	0.0158364	0.00134666
11	A11	133	94.0272	0.0157283	0.00132424
11	A11	134	94.2839	0.0152623	0.00120926
11	A11	135	94.5405	0.0150698	0.000999931
11	A11	136	94.7972	0.0149329	0.000730518
12	A12	1	60.1486	2.03918	0.0876401
12	A12	2	60.4053	2.02709	0.0874244
12	A12	3	60.6619	2.01632	0.0871711
12	A12	4	60.9186	2.00604	0.0869934
12	A12	5	61.1752	1.99825	0.0870192
12	A12	6	61.4319	1.98498	0.0873221
12	A12	7	61.6885	1.97016	0.0878899
12	A12	8	61.9452	1.96214	0.0886453
12	A12	9	62.2019	1.94928	0.0894824
12	A12	10	62.4585	1.93574	0.090296
12	A12	11	62.7152	1.92241	0.0909683
12	A12	12	62.9718	1.91408	0.0913404
12	A12	13	63.2285	1.89971	0.0912079
12	A12	14	63.4851	1.88348	0.0903692
12	A12	15	63.7418	1.87868	0.0887223
12	A12	16	63.9984	1.85235	0.0863561
12	A12	17	64.2551	1.85343	0.0835919
12	A12	18	64.5118	1.83619	0.080928
12	A12	19	64.7684	1.82595	0.0788944
12	A12	20	65.0251	1.81805	0.0778657
12	A12	21	65.2817	1.81181	0.0779151
12	A12	22	65.5384	1.80017	0.078785
12	A12	23	65.795	1.78909	0.0800097
12	A12	24	66.0517	1.7784	0.0811232
12	A12	25	66.3083	1.76037	0.0818378
12	A12	26	66.565	1.75386	0.0820884
12	A12	27	66.8217	1.74272	0.0819393
12	A12	28	67.0783	1.73473	0.0814561
12	A12	29	67.335	1.72103	0.0806583
12	A12	30	67.5916	1.70626	0.0795689
12	A12	31	67.8483	1.69857	0.0782938
12	A12	32	68.1049	1.68554	0.0770234
12	A12	33	68.3616	1.68114	0.0759373
12	A12	34	68.6183	1.66634	0.0750806
12	A12	35	68.8749	1.66019	0.0743085
12	A12	36	69.1316	1.6503	0.0733466
12	A12	37	69.3882	1.6349	0.0719242
12	A12	38	69.6449	1.62676	0.0698888
12	A12	39	69.9015	1.61644	0.0672428
12	A12	40	70.1582	1.60892	0.0641087
12	A12	41	70.4148	1.6048	0.0606903
12	A12	42	70.6715	1.58799	0.0572753
12	A12	43	70.9282	1.58405	0.0542611
12	A12	44	71.1848	1.57694	0.0521367
12	A12	45	71.4415	1.57574	0.0513743
12	A12	46	71.6981	1.56704	0.0522656
12	A12	47	71.9548	1.55912	0.0547903
12	A12	48	72.2114	1.56103	0.0585898
12	A12	49	72.4681	1.5451	0.0630699
12	A12	50	72.7247	1.53799	0.06759
12	A12	51	72.9814	1.52512	0.0716464
12	A12	52	73.2381	1.51679	0.0749667
12	A12	53	73.4947	1.50374	0.0774957
12	A12	54	73.7514	1.49749	0.0793082
12	A12	55	74.008	1.48122	0.0805257
12	A12	56	74.2647	1.47478	0.0812746
12	A12	57	74.5213	1.45822	0.0816807
12	A12	58	74.778	1.45013	0.0818622
12	A12	59	75.0347	1.43886	0.0819031
12	A12	60	75.2913	1.43112	0.0818312
12	A12	61	75.548	1.41525	0.0816353
12	A12	62	75.8046	1.4048	0.0813127
12	A12	63	76.0613	1.39408	0.0809237
12	A12	64	76.3179	1.38527	0.0806007
12	A12	65	76.5746	1.37139	0.0804915
12	A12	66	76.8312	1.36353	0.0806803
12	A12	67	77.0879	1.35125	0.0811146
12	A12	68	77.3446	1.34405	0.0816028
12	A12	69	77.6012	1.33071	0.0818942
12	A12	70	77.8579	1.31627	0.0818145
12	A12	71	78.1145	1.30382	0.0813769
12	A12	72	78.3712	1.29777	0.080797
12	A12	73	78.6278	1.28216	0.0803885
12	A12	74	78.8845	1.27586	0.0804036
12	A12	75	79.1412	1.26532	0.080921
12	A12	76	79.3978	1.25397	0.0818346
12	A12	77	79.6545	1.24146	0.08296
12	A12	78	79.9111	1.22723	0.0841662
12	A12	79	80.1678	1.21841	0.0854595
12	A12	80	80.4244	1.20754	0.0869763
12	A12	81	80.6811	1.19442	0.0889038
12	A12	82	80.9377	1.18358	0.0913941
12	A12	83	81.1944	1.17039	0.0945046
12	A12	84	81.4511	1.16009	0.0981811
12	A12	85	81.7077	1.1431	0.102295
12	A12	86	81.9644	1.1311	0.10675
12	A12	87	82.221	1.11734	0.111725
12	A12	88	82.4777	1.09932	0.118061
12	A12	89	82.7343	1.08	0.127758
12	A12	90	82.991	1.0655	0.14438
12	A12	91	83.2477	1.05364	0.173063
12	A12	92	83.5043	1.03422	0.219743
12	A12	93	83.761	1.02202	0.289368
12	A12	94	84.0176	0.998108	0.383262
12	A12	95	84.2743	0.969946	0.496481
12	A12	96	84.5309	0.91033	0.616506
12	A12	97	84.7876	0.787561	0.724592
12	A12	98	85.0442	0.614827	0.800059
12	A12	99	85.3009	0.423984	0.826353
12	A12	100	85.5576	0.252044	0.796474
12	A12	101	85.8142	0.117326	0.715379
12	A12	102	86.0709	0.0346991	0.598292
12	A12	103	86.3275	0.00117302	0.465731
12	A12	104	86.5842	-0.00965634	0.337462
12	A12	105	86.8408	-0.0137044	0.227776
12	A12	106	87.0975	-0.0157766	0.14351
12	A12	107	87.3541	-0.0164387	0.0847875
12	A12	108	87.6108	-0.0174827	0.0474185
12	A12	109	87.8675	-0.0180616	0.025568
12	A12	110	88.1241	-0.0184065	0.0137344
12	A12	111	88.3808	-0.0187081	0.00771897
12	A12	112	88.6374	-0.0192613	0.00477618
12	A12	113	88.8941	-0.0198288	0.00332914
12	A12	114	89.1507	-0.01963	0.00257235
12	A12	115	89.4074	-0.0200427	0.00213665
12	A12	116	89.664	-0.020125	0.00186528
12	A12	117	89.9207	-0.0200862	0.00168827
12	A12	118	90.1774	-0.0208824	0.00156566
12	A12	119	90.434	-0.0206942	0.00147094
12	A12	120	90.6907	-0.0211072	0.00139083
12	A12	121	90.9473	-0.0212951	0.00132459
12	A12	122	91.204	-0.0207642	0.00127726
12	A12	123	91.4606	-0.0215181	0.00125111
12	A12	124	91.7173	-0.0216916	0.00124182
12	A12	125	91.974	-0.0220652	0.00124066
12	A12	126	92.2306	-0.0216656	0.00123775
12	A12	127	92.4873	-0.0218141	0.00122235
12	A12	128	92.7439	-0.0225895	0.001182
12	A12	129	93.0006	-0.0224409	0.00110525
12	A12	130	93.2572	-0.0228255	0.000987795
12	A12	131	93.5139	-0.0226414	0.000836983
12	A12	132	93.7705	-0.022737	0.000669553
12	A12	133	94.0272	-0.0227671	0.000504283
12	A12	134	94.2839	-0.0228453	0.000355423
12	A12	135	94.5405	-0.0231	0.000230934
12	A12	136	94.7972	-0.0226203	0.00013428
13	A13	1	60.1486	2.05861	0.0839356
13	A13	2	60.4053	2.05186	0.0844616
13	A13	3	60.6619	2.04924	0.0855617
13	A13	4	60.9186	2.03811	0.0869975
13	A13	5	61.1752	2.01871	0.0883737
13	A13	6	61.4319	2.01428	0.0893197
13	A13	7	61.6885	1.99353	0.0896631
13	A13	8	61.9452	1.98283	0.0894853
13	A13	9	62.2019	1.97107	0.0890251
13	A13	10	62.4585	1.96282	0.0885039
13	A13	11	62.7152	1.95207	0.0880087
13	A13	12	62.9718	1.93577	0.0875023
13	A13	13	63.2285	1.92434	0.086923
13	A13	14	63.4851	1.91055	0.0862756
13	A13	15	63.7418	1.90479	0.0856378
13	A13	16	63.9984	1.88792	0.085084
13	A13	17	64.2551	1.88178	0.0846177
13	A13	18	64.5118	1.86844	0.0841547
13	A13	19	64.7684	1.85185	0.0835753
13	A13	20	65.0251	1.84982	0.0827935
13	A13	21	65.2817	1.83015	0.0818021
13	A13	22	65.5384	1.82205	0.0806863
13	A13	23	65.795	1.81436	0.0795982
13	A13	24	66.0517	1.79775	0.0787045
13	A13	25	66.3083	1.79155	0.0781164
13	A13	26	66.565	1.78195	0.0778341
13	A13	27	66.8217	1.77178	0.0777368
13	A13	28	67.0783	1.76009	0.0776434
13	A13	29	67.335	1.74936	0.0774185
13	A13	30	67.5916	1.73517	0.0770402
13	A13	31	67.8483	1.72956	0.0765866
13	A13	32	68.1049	1.71712	0.0761287
13	A13	33	68.3616	1.7092	0.0756246
13	A13	34	68.6183	1.69954	0.074886
13	A13	35	68.8749	1.68747	0.0736606
13	A13	36	69.1316	1.67436	0.0717736
13	A13	37	69.3882	1.6658	0.0692276
13	A13	38	69.6449	1.65622	0.0661923
13	A13	39	69.9015	1.64961	0.0629088
13	A13	40	70.1582	1.64023	0.0595781
13	A13	41	70.4148	1.63496	0.0563203
13	A13	42	70.6715	1.62217	0.0532289
13	A13	43	70.9282	1.62276	0.0504726
13	A13	44	71.1848	1.60762	0.0483671
13	A13	45	71.4415	1.60807	0.0473444
13	A13	46	71.6981	1.60118	0.0478096
13	A13	47	71.9548	1.59528	0.0499415
13	A13	48	72.2114	1.59621	0.0535553
13	A13	49	72.4681	1.58488	0.058114
13	A13	50	72.7247	1.57633	0.0629009
13	A13	51	72.9814	1.56254	0.0672669
13	A13	52	73.2381	1.55523	0.0708085
13	A13	53	73.4947	1.54526	0.0734122
13	A13	54	73.7514	1.5344	0.0751715
13	A13	55	74.008	1.52381	0.0762769
13	A13	56	74.2647	1.51481	0.076943
13	A13	57	74.5213	1.50098	0.0773751
13	A13	58	74.778	1.49091	0.0777533
13	A13	59	75.0347	1.48406	0.0782024
13	A13	60	75.2913	1.47528	0.0787676
13	A13	61	75.548	1.45738	0.0794174
13	A13	62	75.8046	1.45053	0.080078
13	A13	63	76.0613	1.44083	0.0806777
13	A13	64	76.3179	1.42852	0.0811871
13	A13	65	76.5746	1.41824	0.0816426
13	A13	66	76.8312	1.4043	0.0821318
13	A13	67	77.0879	1.39327	0.082745
13	A13	68	77.3446	1.38775	0.0834922
13	A13	69	77.6012	1.37437	0.0842593
13	A13	70	77.8579	1.36345	0.0848592
13	A13	71	78.1145	1.34747	0.0851485
13	A13	72	78.3712	1.33319	0.0851311
13	A13	73	78.6278	1.32827	0.084953
13	A13	74	78.8845	1.3159	0.0847969
13	A13	75	79.1412	1.30376	0.0847701
13	A13	76	79.3978	1.29182	0.0848791
13	A13	77	79.6545	1.27946	0.0850981
13	A13	78	79.9111	1.26762	0.0854712
13	A13	79	80.1678	1.25626	0.0861633
13	A13	80	80.4244	1.24586	0.0874307
13	A13	81	80.6811	1.23468	0.0895435
13	A13	82	80.9377	1.22209	0.0926921
13	A13	83	81.1944	1.21006	0.0969191
13	A13	84	81.4511	1.19968	0.102082
13	A13	85	81.7077	1.18265	0.107877
13	A13	86	81.9644	1.16915	0.113966
13	A13	87	82.221	1.15197	0.120264
13	A13	88	82.4777	1.13367	0.127403
13	A13	89	82.7343	1.11542	0.137303
13	A13	90	82.991	1.09482	0.153625
13	A13	91	83.2477	1.07688	0.181761
13	A13	92	83.5043	1.06753	0.227955
13	A13	93	83.761	1.0526	0.297351
13	A13	94	84.0176	1.02459	0.391238
13	A13	95	84.2743	0.996404	0.504378
13	A13	96	84.5309	0.937355	0.623824
13	A13	97	84.7876	0.810925	0.730456
13	A13	98	85.0442	0.634894	0.803476
13	A13	99	85.3009	0.443816	0.826576
13	A13	100	85.5576	0.273728	0.793315
13	A13	101	85.8142	0.141408	0.709337
13	A13	102	86.0709	0.0635218	0.590427
13	A13	103	86.3275	0.0319596	0.457338
13	A13	104	86.5842	0.0226768	0.329699
13	A13	105	86.8408	0.018497	0.221393
13	A13	106	87.0975	0.0164361	0.138763
13	A13	107	87.3541	0.0160415	0.081534
13	A13	108	87.6108	0.0147786	0.0453036
13	A13	109	87.8675	0.0136276	0.024213
13	A13	110	88.1241	0.0144648	0.0128618
13	A13	111	88.3808	0.0142327	0.00719085
13	A13	112	88.6374	0.0137115	0.00456282
13	A13	113	88.8941	0.0127328	0.00344448
13	A13	114	89.1507	0.0131617	0.00301668
13	A13	115	89.4074	0.0120488	0.00287047
13	A13	116	89.664	0.011995	0.00281488
13	A13	117	89.9207	0.0117363	0.00276629
13	A13	118	90.1774	0.0112574	0.002688
13	A13	119	90.434	0.010814	0.00256344
13	A13	120	90.6907	0.0106192	0.00239216
13	A13	121	90.9473	0.00940586	0.00219461
13	A13	122	91.204	0.0101756	0.00200976
13	A13	123	91.4606	0.010613	0.00187816
13	A13	124	91.7173	0.00938928	0.00181785
13	A13	125	91.974	0.00949741	0.00181006
13	A13	126	92.2306	0.00916605	0.00180627
13	A13	127	92.4873	0.00883288	0.00175352
13	A13	128	92.7439	0.00821575	0.00162281
13	A13	129	93.0006	0.00815847	0.00142376
13	A13	130	93.2572	0.00812493	0.0011973
13	A13	131	93.5139	0.00879009	0.00099145
13	A13	132	93.7705	0.00808086	0.000835086
13	A13	133	94.0272	0.00800175	0.000725575
13	A13	134	94.2839	0.007883	0.000636691
13	A13	135	94.5405	0.00800466	0.000539388
13	A13	136	94.7972	0.00732092	0.000420483
14	A14	1	60.1486	2.04685	0.0863198
14	A14	2	60.4053	2.04051	0.0867075
14	A14	3	60.6619	2.02589	0.0869737
14	A14	4	60.9186	2.01064	0.0871112
14	A14	5	61.1752	2.0049	0.087226
14	A14	6	61.4319	1.99335	0.0874394
14	A14	7	61.6885	1.98052	0.0877726
14	A14	8	61.9452	1.97145	0.0881177
14	A14	9	62.2019	1.95673	0.0883139
14	A14	10	62.4585	1.93988	0.0882643
14	A14	11	62.7152	1.93505	0.0879912
14	A14	12	62.9718	1.92033	0.0876045
14	A14	13	63.2285	1.90849	0.0872156
14	A14	14	63.4851	1.8972	0.0868689
14	A14	15	63.7418	1.88786	0.0865353
14	A14	16	63.9984	1.87252	0.0861588
14	A14	17	64.2551	1.86185	0.0857139
14	A14	18	64.5118	1.85005	0.0852313
14	A14	19	64.7684	1.84018	0.0847781
14	A14	20	65.0251	1.82798	0.084406
14	A14	21	65.2817	1.81623	0.0841086
14	A14	22	65.5384	1.80579	0.0838159
14	A14	23	65.795	1.79862	0.0834344
14	A14	24	66.0517	1.77739	0.0828978
14	A14	25	66.3083	1.77177	0.0821906
14	A14	26	66.565	1.76347	0.0813208
14	A14	27	66.8217	1.74678	0.0802789
14	A14	28	67.0783	1.74177	0.0790285
14	A14	29	67.335	1.72924	0.077574
14	A14	30	67.5916	1.71528	0.0760343
14	A14	31	67.8483	1.70464	0.074651
14	A14	32	68.1049	1.69663	0.0736725
14	A14	33	68.3616	1.69344	0.0731828
14	A14	34	68.6183	1.68229	0.0730061
14	A14	35	68.8749	1.66935	0.0727744
14	A14	36	69.1316	1.65423	0.0721105
14	A14	37	69.3882	1.6512	0.0707947
14	A14	38	69.6449	1.63717	0.0687993
14	A14	39	69.9015	1.62922	0.0662112
14	A14	40	70.1582	1.62238	0.063131
14	A14	41	70.4148	1.61238	0.0596487
14	A14	42	70.6715	1.60361	0.0559175
14	A14	43	70.9282	1.59749	0.052246
14	A14	44	71.1848	1.58547	0.0491238
14	A14	45	71.4415	1.58684	0.0471238
14	A14	46	71.6981	1.58245	0.0467231
14	A14	47	71.9548	1.57586	0.0481359
14	A14	48	72.2114	1.57048	0.0512299
14	A14	49	72.4681	1.56292	0.055555
14	A14	50	72.7247	1.55864	0.0604641
14	A14	51	72.9814	1.54927	0.0652886
14	A14	52	73.2381	1.53494	0.0695032
14	A14	53	73.4947	1.52234	0.0728275
14	A14	54	73.7514	1.51776	0.0752192
14	A14	55	74.008	1.50721	0.076791
14	A14	56	74.2647	1.494	0.0777234
14	A14	57	74.5213	1.482	0.0782165
14	A14	58	74.778	1.47419	0.0784958
14	A14	59	75.0347	1.46081	0.0787967
14	A14	60	75.2913	1.45417	0.0793191
14	A14	61	75.548	1.44121	0.0801535
14	A14	62	75.8046	1.43302	0.081228
14	A14	63	76.0613	1.4203	0.0823362
14	A14	64	76.3179	1.40932	0.0832237
14	A14	65	76.5746	1.40024	0.0837224
14	A14	66	76.8312	1.37899	0.0838302
14	A14	67	77.0879	1.37623	0.0837038
14	A14	68	77.3446	1.36274	0.0835527
14	A14	69	77.6012	1.35331	0.0835082
14	A14	70	77.8579	1.34465	0.0835653
14	A14	71	78.1145	1.32657	0.0836245
14	A14	72	78.3712	1.31702	0.0835852
14	A14	73	78.6278	1.3066	0.0834265
14	A14	74	78.8845	1.2986	0.0832219
14	A14	75	79.1412	1.28159	0.0831093
14	A14	76	79.3978	1.2712	0.0832445
14	A14	77	79.6545	1.26295	0.0837432
14	A14	78	79.9111	1.25248	0.084651
14	A14	79	80.1678	1.24013	0.0859491
14	A14	80	80.4244	1.22562	0.0876108
14	A14	81	80.6811	1.21572	0.0896775
14	A14	82	80.9377	1.20219	0.092293
14	A14	83	81.1944	1.19434	0.0956579
14	A14	84	81.4511	1.17535	0.0999145
14	A14	85	81.7077	1.16861	0.105034
14	A14	86	81.9644	1.15163	0.110824
14	A14	87	82.221	1.13828	0.117159
14	A14	88	82.4777	1.11919	0.124488
14	A14	89	82.7343	1.09815	0.134514
14	A14	90	82.991	1.07681	0.150749
14	A14	91	83.2477	1.06568	0.178545
14	A14	92	83.5043	1.0521	0.224191
14	A14	93	83.761	1.0373	0.29291
14	A14	94	84.0176	1.01297	0.386071
14	A14	95	84.2743	0.983756	0.498526
14	A14	96	84.5309	0.9263	0.617433
14	A14	97	84.7876	0.799888	0.723795
14	A14	98	85.0442	0.627273	0.79692
14	A14	99	85.3009	0.439513	0.820534
14	A14	100	85.5576	0.269051	0.78814
14	A14	101	85.8142	0.137343	0.705242
14	A14	102	86.0709	0.0598849	0.587458
14	A14	103	86.3275	0.0295056	0.455398
14	A14	104	86.5842	0.0191955	0.328601
14	A14	105	86.8408	0.0153364	0.22092
14	A14	106	87.0975	0.0132822	0.138712
14	A14	107	87.3541	0.0122556	0.0817465
14	A14	108	87.6108	0.0109124	0.0456733
14	A14	109	87.8675	0.0113478	0.0246766
14	A14	110	88.1241	0.0105925	0.0133761
14	A14	111	88.3808	0.010054	0.00771088
14	A14	112	88.6374	0.00972673	0.00503472
14	A14	113	88.8941	0.00936371	0.00381454
14	A14	114	89.1507	0.00876957	0.00324548
14	A14	115	89.4074	0.00847693	0.00294049
14	A14	116	89.664	0.00837815	0.00272956
14	A14	117	89.9207	0.00748626	0.00254674
14	A14	118	90.1774	0.00742984	0.00237177
14	A14	119	90.434	0.00780235	0.00220129
14	A14	120	90.6907	0.00652817	0.00203558
14	A14	121	90.9473	0.0067594	0.00187403
14	A14	122	91.204	0.00664349	0.00171566
14	A14	123	91.4606	0.00635696	0.00156205
14	A14	124	91.7173	0.00604916	0.00142073
14	A14	125	91.974	0.00604551	0.0013072
14	A14	126	92.2306	0.00575257	0.00124272
14	A14	127	92.4873	0.00579441	0.00124492
14	A14	128	92.7439	0.00594381	0.00131367
14	A14	129	93.0006	0.00577995	0.00142077
14	A14	130	93.2572	0.00514052	0.00151419
14	A14	131	93.5139	0.00423538	0.0015385
14	A14	132	93.7705	0.00468397	0.00146018
14	A14	133	94.0272	0.00440991	0.00128139
14	A14	134	94.2839	0.00426972	0.00103454
14	A14	135	94.5405	0.00457961	0.000764256
14	A14	136	94.7972	0.00374828	0.000510075
15	A15	1	60.1486	2.05374	0.0858202
15	A15	2	60.4053	2.04115	0.0868366
15	A15	3	60.6619	2.03033	0.0878479
15	A15	4	60.9186	2.01722	0.0886764
15	A15	5	61.1752	2.00716	0.089273
15	A15	6	61.4319	1.99389	0.0896771
15	A15	7	61.6885	1.98147	0.0899157
15	A15	8	61.9452	1.97392	0.0899346
15	A15	9	62.2019	1.96083	0.0896223
15	A15	10	62.4585	1.94176	0.0889192
15	A15	11	62.7152	1.93222	0.0878927
15	A15	12	62.9718	1.92311	0.0867136
15	A15	13	63.2285	1.90957	0.085544
15	A15	14	63.4851	1.90145	0.0844408
15	A15	15	63.7418	1.89179	0.0833787
15	A15	16	63.9984	1.87462	0.082363
15	A15	17	64.2551	1.86182	0.0815292
15	A15	18	64.5118	1.85321	0.0811037
15	A15	19	64.7684	1.85154	0.0812498
15	A15	20	65.0251	1.83479	0.0819172
15	A15	21	65.2817	1.82465	0.0828289
15	A15	22	65.5384	1.81275	0.0836152
15	A15	23	65.795	1.80056	0.0839888
15	A15	24	66.0517	1.78467	0.0838372
15	A15	25	66.3083	1.78183	0.0832047
15	A15	26	66.565	1.76768	0.0822149
15	A15	27	66.8217	1.75207	0.0810072
15	A15	28	67.0783	1.7465	0.0797106
15	A15	29	67.335	1.73249	0.0784446
15	A15	30	67.5916	1.72511	0.0773056
15	A15	31	67.8483	1.71631	0.0763508
15	A15	32	68.1049	1.69975	0.0755746
15	A15	33	68.3616	1.69511	0.0748969
15	A15	34	68.6183	1.68496	0.0741722
15	A15	35	68.8749	1.67567	0.0732349
15	A15	36	69.1316	1.66421	0.071964
15	A15	37	69.3882	1.64824	0.0703321
15	A15	38	69.6449	1.64613	0.0683752
15	A15	39	69.9015	1.63673	0.0661058
15	A15	40	70.1582	1.62785	0.0634505
15	A15	41	70.4148	1.61943	0.0603022
15	A15	42	70.6715	1.60938	0.0566693
15	A15	43	70.9282	1.59753	0.0528094
15	A15	44	71.1848	1.59241	0.0492311
15	A15	45	71.4415	1.59409	0.0465502
15	A15	46	71.6981	1.5899	0.0453047
15	A15	47	71.9548	1.5764	0.0458324
15	A15	48	72.2114	1.57435	0.0482267
15	A15	49	72.4681	1.57111	0.0523188
15	A15	50	72.7247	1.5668	0.057665
15	A15	51	72.9814	1.55854	0.0635851
15	A15	52	73.2381	1.54506	0.0693043
15	A15	53	73.4947	1.53556	0.0741645
15	A15	54	73.7514	1.5214	0.0777929
15	A15	55	74.008	1.51053	0.0801278
15	A15	56	74.2647	1.50405	0.0813243
15	A15	57	74.5213	1.49053	0.0816319
15	A15	58	74.778	1.47831	0.0813354
15	A15	59	75.0347	1.46502	0.0807395
15	A15	60	75.2913	1.45428	0.0801479
15	A15	61	75.548	1.4517	0.0797938
[truncated: 50,259 more rows]
