# Supplementary material for: Transcriptomic identification of HBx-associated hub genes in hepatocellular carcinoma
Source: PeerJ. 2021 Dec 22;9:e12697. doi: 10.7717/peerj.12697 (PMC8710059; doi:10.7717/peerj.12697)
Supplement: Supplemental Information 16 [file peerj-09-12697-s016.xlsx]

## Sheet: Sample Setup
Block Type	384-Well Block
Calibration Background is expired	Yes
Calibration Background performed on	10-12-2018 11:47:46 PDT
Calibration FAM is expired	Yes
Calibration FAM performed on	10-23-2018 10:23:19 PDT
Calibration MELTDOCTOR is expired	Yes
Calibration MELTDOCTOR performed on	09-26-2017 21:22:46 PDT
Calibration NED is expired	Yes
Calibration NED performed on	10-23-2018 10:33:14 PDT
Calibration ROI is expired	Yes
Calibration ROI performed on	10-12-2018 09:37:21 PDT
Calibration ROX is expired	Yes
Calibration ROX performed on	10-23-2018 10:07:21 PDT
Calibration SYBR is expired	Yes
Calibration SYBR performed on	10-23-2018 09:57:53 PDT
Calibration TAMRA is expired	Yes
Calibration TAMRA performed on	10-23-2018 10:45:25 PDT
Calibration Uniformity is expired	Yes
Calibration Uniformity performed on	10-12-2018 10:06:59 PDT
Calibration VIC is expired	Yes
Calibration VIC performed on	10-23-2018 10:54:25 PDT
Chemistry	SYBR_GREEN
Date Created	09-12-2021 23:22:22 PDT
Experiment File Name	D:\NZZ\2021-09-12 215735.eds
Experiment Name	2021-09-12 215735
Experiment Run End Time	09-12-2021 16:37:35 PDT
Experiment Type	Comparative Cт (ΔΔCт)
Instrument Name	285880860
Instrument Serial Number	285880860
Instrument Type	QuantStudio 12K Flex
Passive Reference	ROX
Quantification Cycle Method	Ct
Signal Smoothing On	true
Stage/ Cycle where Analysis is performed	Stage 2, Step 2
Well	Well Position	Sample Name	Sample Color	Biogroup Name	Biogroup Color	Target Name	Target Color	Task	Reporter	Quencher	Quantity	Comments
1	A1
2	A2
3	A3
4	A4
5	A5
6	A6
7	A7	Vec-PMH-D	RGB(176,23,31)			mARG1	RGB(176,23,31)	UNKNOWN	SYBR	None
8	A8	Vec-PMH-D	RGB(176,23,31)			mARG1	RGB(176,23,31)	UNKNOWN	SYBR	None
9	A9	Vec-PMH-D	RGB(176,23,31)			mARG1	RGB(176,23,31)	UNKNOWN	SYBR	None
10	A10	HBx-PMH-D	RGB(0,0,255)			mARG1	RGB(176,23,31)	UNKNOWN	SYBR	None
11	A11	HBx-PMH-D	RGB(0,0,255)			mARG1	RGB(176,23,31)	UNKNOWN	SYBR	None
12	A12	HBx-PMH-D	RGB(0,0,255)			mARG1	RGB(176,23,31)	UNKNOWN	SYBR	None
13	A13	Vec-PMH-L	RGB(0,139,69)			mARG1	RGB(176,23,31)	UNKNOWN	SYBR	None
14	A14	Vec-PMH-L	RGB(0,139,69)			mARG1	RGB(176,23,31)	UNKNOWN	SYBR	None
15	A15	Vec-PMH-L	RGB(0,139,69)			mARG1	RGB(176,23,31)	UNKNOWN	SYBR	None
16	A16	HBx-PMH-L-L	RGB(255,127,0)			mARG1	RGB(176,23,31)	UNKNOWN	SYBR	None
17	A17	HBx-PMH-L-L	RGB(255,127,0)			mARG1	RGB(176,23,31)	UNKNOWN	SYBR	None
18	A18	HBx-PMH-L-L	RGB(255,127,0)			mARG1	RGB(176,23,31)	UNKNOWN	SYBR	None
19	A19	HBx-PMH-H-L	RGB(139,137,112)			mARG1	RGB(176,23,31)	UNKNOWN	SYBR	None
20	A20	HBx-PMH-H-L	RGB(139,137,112)			mARG1	RGB(176,23,31)	UNKNOWN	SYBR	None
21	A21	HBx-PMH-H-L	RGB(139,137,112)			mARG1	RGB(176,23,31)	UNKNOWN	SYBR	None
22	A22
23	A23
24	A24
25	B1
26	B2
27	B3
28	B4
29	B5
30	B6
31	B7	Vec-PMH-D	RGB(176,23,31)			mANGPTL6	RGB(0,0,255)	UNKNOWN	SYBR	None
32	B8	Vec-PMH-D	RGB(176,23,31)			mANGPTL6	RGB(0,0,255)	UNKNOWN	SYBR	None
33	B9	Vec-PMH-D	RGB(176,23,31)			mANGPTL6	RGB(0,0,255)	UNKNOWN	SYBR	None
34	B10	HBx-PMH-D	RGB(0,0,255)			mANGPTL6	RGB(0,0,255)	UNKNOWN	SYBR	None
35	B11	HBx-PMH-D	RGB(0,0,255)			mANGPTL6	RGB(0,0,255)	UNKNOWN	SYBR	None
36	B12	HBx-PMH-D	RGB(0,0,255)			mANGPTL6	RGB(0,0,255)	UNKNOWN	SYBR	None
37	B13	Vec-PMH-L	RGB(0,139,69)			mANGPTL6	RGB(0,0,255)	UNKNOWN	SYBR	None
38	B14	Vec-PMH-L	RGB(0,139,69)			mANGPTL6	RGB(0,0,255)	UNKNOWN	SYBR	None
39	B15	Vec-PMH-L	RGB(0,139,69)			mANGPTL6	RGB(0,0,255)	UNKNOWN	SYBR	None
40	B16	HBx-PMH-L-L	RGB(255,127,0)			mANGPTL6	RGB(0,0,255)	UNKNOWN	SYBR	None
41	B17	HBx-PMH-L-L	RGB(255,127,0)			mANGPTL6	RGB(0,0,255)	UNKNOWN	SYBR	None
42	B18	HBx-PMH-L-L	RGB(255,127,0)			mANGPTL6	RGB(0,0,255)	UNKNOWN	SYBR	None
43	B19	HBx-PMH-H-L	RGB(139,137,112)			mANGPTL6	RGB(0,0,255)	UNKNOWN	SYBR	None
44	B20	HBx-PMH-H-L	RGB(139,137,112)			mANGPTL6	RGB(0,0,255)	UNKNOWN	SYBR	None
45	B21	HBx-PMH-H-L	RGB(139,137,112)			mANGPTL6	RGB(0,0,255)	UNKNOWN	SYBR	None
46	B22
47	B23
48	B24
49	C1
50	C2
51	C3
52	C4
53	C5
54	C6
55	C7	Vec-PMH-D	RGB(176,23,31)			mRGS5	RGB(0,139,69)	UNKNOWN	SYBR	None
56	C8	Vec-PMH-D	RGB(176,23,31)			mRGS5	RGB(0,139,69)	UNKNOWN	SYBR	None
57	C9	Vec-PMH-D	RGB(176,23,31)			mRGS5	RGB(0,139,69)	UNKNOWN	SYBR	None
58	C10	HBx-PMH-D	RGB(0,0,255)			mRGS5	RGB(0,139,69)	UNKNOWN	SYBR	None
59	C11	HBx-PMH-D	RGB(0,0,255)			mRGS5	RGB(0,139,69)	UNKNOWN	SYBR	None
60	C12	HBx-PMH-D	RGB(0,0,255)			mRGS5	RGB(0,139,69)	UNKNOWN	SYBR	None
61	C13	Vec-PMH-L	RGB(0,139,69)			mRGS5	RGB(0,139,69)	UNKNOWN	SYBR	None
62	C14	Vec-PMH-L	RGB(0,139,69)			mRGS5	RGB(0,139,69)	UNKNOWN	SYBR	None
63	C15	Vec-PMH-L	RGB(0,139,69)			mRGS5	RGB(0,139,69)	UNKNOWN	SYBR	None
64	C16	HBx-PMH-L-L	RGB(255,127,0)			mRGS5	RGB(0,139,69)	UNKNOWN	SYBR	None
65	C17	HBx-PMH-L-L	RGB(255,127,0)			mRGS5	RGB(0,139,69)	UNKNOWN	SYBR	None
66	C18	HBx-PMH-L-L	RGB(255,127,0)			mRGS5	RGB(0,139,69)	UNKNOWN	SYBR	None
67	C19	HBx-PMH-H-L	RGB(139,137,112)			mRGS5	RGB(0,139,69)	UNKNOWN	SYBR	None
68	C20	HBx-PMH-H-L	RGB(139,137,112)			mRGS5	RGB(0,139,69)	UNKNOWN	SYBR	None
69	C21	HBx-PMH-H-L	RGB(139,137,112)			mRGS5	RGB(0,139,69)	UNKNOWN	SYBR	None
70	C22
71	C23
72	C24
73	D1
74	D2
75	D3
76	D4
77	D5
78	D6
79	D7	Vec-PMH-D	RGB(176,23,31)			mPALM2	RGB(238,238,0)	UNKNOWN	SYBR	None
80	D8	Vec-PMH-D	RGB(176,23,31)			mPALM2	RGB(238,238,0)	UNKNOWN	SYBR	None
81	D9	Vec-PMH-D	RGB(176,23,31)			mPALM2	RGB(238,238,0)	UNKNOWN	SYBR	None
82	D10	HBx-PMH-D	RGB(0,0,255)			mPALM2	RGB(238,238,0)	UNKNOWN	SYBR	None
83	D11	HBx-PMH-D	RGB(0,0,255)			mPALM2	RGB(238,238,0)	UNKNOWN	SYBR	None
84	D12	HBx-PMH-D	RGB(0,0,255)			mPALM2	RGB(238,238,0)	UNKNOWN	SYBR	None
85	D13	Vec-PMH-L	RGB(0,139,69)			mPALM2	RGB(238,238,0)	UNKNOWN	SYBR	None
86	D14	Vec-PMH-L	RGB(0,139,69)			mPALM2	RGB(238,238,0)	UNKNOWN	SYBR	None
87	D15	Vec-PMH-L	RGB(0,139,69)			mPALM2	RGB(238,238,0)	UNKNOWN	SYBR	None
88	D16	HBx-PMH-L-L	RGB(255,127,0)			mPALM2	RGB(238,238,0)	UNKNOWN	SYBR	None
89	D17	HBx-PMH-L-L	RGB(255,127,0)			mPALM2	RGB(238,238,0)	UNKNOWN	SYBR	None
90	D18	HBx-PMH-L-L	RGB(255,127,0)			mPALM2	RGB(238,238,0)	UNKNOWN	SYBR	None
91	D19	HBx-PMH-H-L	RGB(139,137,112)			mPALM2	RGB(238,238,0)	UNKNOWN	SYBR	None
92	D20	HBx-PMH-H-L	RGB(139,137,112)			mPALM2	RGB(238,238,0)	UNKNOWN	SYBR	None
93	D21	HBx-PMH-H-L	RGB(139,137,112)			mPALM2	RGB(238,238,0)	UNKNOWN	SYBR	None
94	D22
95	D23
96	D24
97	E1
98	E2
99	E3
100	E4
101	E5
102	E6
103	E7	Vec-PMH-D	RGB(176,23,31)			mCyclophilion	RGB(139,137,112)	UNKNOWN	SYBR	None
104	E8	Vec-PMH-D	RGB(176,23,31)			mCyclophilion	RGB(139,137,112)	UNKNOWN	SYBR	None
105	E9	Vec-PMH-D	RGB(176,23,31)			mCyclophilion	RGB(139,137,112)	UNKNOWN	SYBR	None
106	E10	HBx-PMH-D	RGB(0,0,255)			mCyclophilion	RGB(139,137,112)	UNKNOWN	SYBR	None
107	E11	HBx-PMH-D	RGB(0,0,255)			mCyclophilion	RGB(139,137,112)	UNKNOWN	SYBR	None
108	E12	HBx-PMH-D	RGB(0,0,255)			mCyclophilion	RGB(139,137,112)	UNKNOWN	SYBR	None
109	E13	Vec-PMH-L	RGB(0,139,69)			mCyclophilion	RGB(139,137,112)	UNKNOWN	SYBR	None
110	E14	Vec-PMH-L	RGB(0,139,69)			mCyclophilion	RGB(139,137,112)	UNKNOWN	SYBR	None
111	E15	Vec-PMH-L	RGB(0,139,69)			mCyclophilion	RGB(139,137,112)	UNKNOWN	SYBR	None
112	E16	HBx-PMH-L-L	RGB(255,127,0)			mCyclophilion	RGB(139,137,112)	UNKNOWN	SYBR	None
113	E17	HBx-PMH-L-L	RGB(255,127,0)			mCyclophilion	RGB(139,137,112)	UNKNOWN	SYBR	None
114	E18	HBx-PMH-L-L	RGB(255,127,0)			mCyclophilion	RGB(139,137,112)	UNKNOWN	SYBR	None
115	E19	HBx-PMH-H-L	RGB(139,137,112)			mCyclophilion	RGB(139,137,112)	UNKNOWN	SYBR	None
116	E20	HBx-PMH-H-L	RGB(139,137,112)			mCyclophilion	RGB(139,137,112)	UNKNOWN	SYBR	None
117	E21	HBx-PMH-H-L	RGB(139,137,112)			mCyclophilion	RGB(139,137,112)	UNKNOWN	SYBR	None
118	E22
119	E23
120	E24
121	F1
122	F2
123	F3
124	F4
125	F5
126	F6
127	F7	Vec-PMH-D	RGB(176,23,31)			mGNAL	RGB(238,121,66)	UNKNOWN	SYBR	None
128	F8	Vec-PMH-D	RGB(176,23,31)			mGNAL	RGB(238,121,66)	UNKNOWN	SYBR	None
129	F9	Vec-PMH-D	RGB(176,23,31)			mGNAL	RGB(238,121,66)	UNKNOWN	SYBR	None
130	F10	HBx-PMH-D	RGB(0,0,255)			mGNAL	RGB(238,121,66)	UNKNOWN	SYBR	None
131	F11	HBx-PMH-D	RGB(0,0,255)			mGNAL	RGB(238,121,66)	UNKNOWN	SYBR	None
132	F12	HBx-PMH-D	RGB(0,0,255)			mGNAL	RGB(238,121,66)	UNKNOWN	SYBR	None
133	F13	Vec-PMH-L	RGB(0,139,69)			mGNAL	RGB(238,121,66)	UNKNOWN	SYBR	None
134	F14	Vec-PMH-L	RGB(0,139,69)			mGNAL	RGB(238,121,66)	UNKNOWN	SYBR	None
135	F15	Vec-PMH-L	RGB(0,139,69)			mGNAL	RGB(238,121,66)	UNKNOWN	SYBR	None
136	F16	HBx-PMH-L-L	RGB(255,127,0)			mGNAL	RGB(238,121,66)	UNKNOWN	SYBR	None
137	F17	HBx-PMH-L-L	RGB(255,127,0)			mGNAL	RGB(238,121,66)	UNKNOWN	SYBR	None
138	F18	HBx-PMH-L-L	RGB(255,127,0)			mGNAL	RGB(238,121,66)	UNKNOWN	SYBR	None
139	F19	HBx-PMH-H-L	RGB(139,137,112)			mGNAL	RGB(238,121,66)	UNKNOWN	SYBR	None
140	F20	HBx-PMH-H-L	RGB(139,137,112)			mGNAL	RGB(238,121,66)	UNKNOWN	SYBR	None
141	F21	HBx-PMH-H-L	RGB(139,137,112)			mGNAL	RGB(238,121,66)	UNKNOWN	SYBR	None
142	F22
143	F23
144	F24
145	G1
146	G2
147	G3
148	G4
149	G5
150	G6
151	G7	Vec-PMH-D	RGB(176,23,31)			mTAT	RGB(142,56,142)	UNKNOWN	SYBR	None
152	G8	Vec-PMH-D	RGB(176,23,31)			mTAT	RGB(142,56,142)	UNKNOWN	SYBR	None
153	G9	Vec-PMH-D	RGB(176,23,31)			mTAT	RGB(142,56,142)	UNKNOWN	SYBR	None
154	G10	HBx-PMH-D	RGB(0,0,255)			mTAT	RGB(142,56,142)	UNKNOWN	SYBR	None
155	G11	HBx-PMH-D	RGB(0,0,255)			mTAT	RGB(142,56,142)	UNKNOWN	SYBR	None
156	G12	HBx-PMH-D	RGB(0,0,255)			mTAT	RGB(142,56,142)	UNKNOWN	SYBR	None
157	G13	Vec-PMH-L	RGB(0,139,69)			mTAT	RGB(142,56,142)	UNKNOWN	SYBR	None
158	G14	Vec-PMH-L	RGB(0,139,69)			mTAT	RGB(142,56,142)	UNKNOWN	SYBR	None
159	G15	Vec-PMH-L	RGB(0,139,69)			mTAT	RGB(142,56,142)	UNKNOWN	SYBR	None
160	G16	HBx-PMH-L-L	RGB(255,127,0)			mTAT	RGB(142,56,142)	UNKNOWN	SYBR	None
161	G17	HBx-PMH-L-L	RGB(255,127,0)			mTAT	RGB(142,56,142)	UNKNOWN	SYBR	None
162	G18	HBx-PMH-L-L	RGB(255,127,0)			mTAT	RGB(142,56,142)	UNKNOWN	SYBR	None
163	G19	HBx-PMH-H-L	RGB(139,137,112)			mTAT	RGB(142,56,142)	UNKNOWN	SYBR	None
164	G20	HBx-PMH-H-L	RGB(139,137,112)			mTAT	RGB(142,56,142)	UNKNOWN	SYBR	None
165	G21	HBx-PMH-H-L	RGB(139,137,112)			mTAT	RGB(142,56,142)	UNKNOWN	SYBR	None
166	G22
167	G23
168	G24
169	H1
170	H2
171	H3
172	H4
173	H5
174	H6
175	H7	Vec-PMH-D	RGB(176,23,31)			mALDOB	RGB(198,113,113)	UNKNOWN	SYBR	None
176	H8	Vec-PMH-D	RGB(176,23,31)			mALDOB	RGB(198,113,113)	UNKNOWN	SYBR	None
177	H9	Vec-PMH-D	RGB(176,23,31)			mALDOB	RGB(198,113,113)	UNKNOWN	SYBR	None
178	H10	HBx-PMH-D	RGB(0,0,255)			mALDOB	RGB(198,113,113)	UNKNOWN	SYBR	None
179	H11	HBx-PMH-D	RGB(0,0,255)			mALDOB	RGB(198,113,113)	UNKNOWN	SYBR	None
180	H12	HBx-PMH-D	RGB(0,0,255)			mALDOB	RGB(198,113,113)	UNKNOWN	SYBR	None
181	H13	Vec-PMH-L	RGB(0,139,69)			mALDOB	RGB(198,113,113)	UNKNOWN	SYBR	None
182	H14	Vec-PMH-L	RGB(0,139,69)			mALDOB	RGB(198,113,113)	UNKNOWN	SYBR	None
183	H15	Vec-PMH-L	RGB(0,139,69)			mALDOB	RGB(198,113,113)	UNKNOWN	SYBR	None
184	H16	HBx-PMH-L-L	RGB(255,127,0)			mALDOB	RGB(198,113,113)	UNKNOWN	SYBR	None
185	H17	HBx-PMH-L-L	RGB(255,127,0)			mALDOB	RGB(198,113,113)	UNKNOWN	SYBR	None
186	H18	HBx-PMH-L-L	RGB(255,127,0)			mALDOB	RGB(198,113,113)	UNKNOWN	SYBR	None
187	H19	HBx-PMH-H-L	RGB(139,137,112)			mALDOB	RGB(198,113,113)	UNKNOWN	SYBR	None
188	H20	HBx-PMH-H-L	RGB(139,137,112)			mALDOB	RGB(198,113,113)	UNKNOWN	SYBR	None
189	H21	HBx-PMH-H-L	RGB(139,137,112)			mALDOB	RGB(198,113,113)	UNKNOWN	SYBR	None
190	H22
191	H23
192	H24
193	I1
194	I2
195	I3
196	I4
197	I5
198	I6
199	I7	Vec-PMH-D	RGB(176,23,31)			mMAGEA6	RGB(0,245,255)	UNKNOWN	SYBR	None
200	I8	Vec-PMH-D	RGB(176,23,31)			mMAGEA6	RGB(0,245,255)	UNKNOWN	SYBR	None
201	I9	Vec-PMH-D	RGB(176,23,31)			mMAGEA6	RGB(0,245,255)	UNKNOWN	SYBR	None
202	I10	HBx-PMH-D	RGB(0,0,255)			mMAGEA6	RGB(0,245,255)	UNKNOWN	SYBR	None
203	I11	HBx-PMH-D	RGB(0,0,255)			mMAGEA6	RGB(0,245,255)	UNKNOWN	SYBR	None
204	I12	HBx-PMH-D	RGB(0,0,255)			mMAGEA6	RGB(0,245,255)	UNKNOWN	SYBR	None
205	I13	Vec-PMH-L	RGB(0,139,69)			mMAGEA6	RGB(0,245,255)	UNKNOWN	SYBR	None
206	I14	Vec-PMH-L	RGB(0,139,69)			mMAGEA6	RGB(0,245,255)	UNKNOWN	SYBR	None
207	I15	Vec-PMH-L	RGB(0,139,69)			mMAGEA6	RGB(0,245,255)	UNKNOWN	SYBR	None
208	I16	HBx-PMH-L-L	RGB(255,127,0)			mMAGEA6	RGB(0,245,255)	UNKNOWN	SYBR	None
209	I17	HBx-PMH-L-L	RGB(255,127,0)			mMAGEA6	RGB(0,245,255)	UNKNOWN	SYBR	None
210	I18	HBx-PMH-L-L	RGB(255,127,0)			mMAGEA6	RGB(0,245,255)	UNKNOWN	SYBR	None
211	I19	HBx-PMH-H-L	RGB(139,137,112)			mMAGEA6	RGB(0,245,255)	UNKNOWN	SYBR	None
212	I20	HBx-PMH-H-L	RGB(139,137,112)			mMAGEA6	RGB(0,245,255)	UNKNOWN	SYBR	None
213	I21	HBx-PMH-H-L	RGB(139,137,112)			mMAGEA6	RGB(0,245,255)	UNKNOWN	SYBR	None
214	I22
215	I23
216	I24
217	J1
218	J2
219	J3
220	J4
221	J5
222	J6
223	J7	Vec-PMH-D	RGB(176,23,31)			HBx	RGB(238,220,130)	UNKNOWN	SYBR	None
224	J8	Vec-PMH-D	RGB(176,23,31)			HBx	RGB(238,220,130)	UNKNOWN	SYBR	None
225	J9	Vec-PMH-D	RGB(176,23,31)			HBx	RGB(238,220,130)	UNKNOWN	SYBR	None
226	J10	HBx-PMH-D	RGB(0,0,255)			HBx	RGB(238,220,130)	UNKNOWN	SYBR	None
227	J11	HBx-PMH-D	RGB(0,0,255)			HBx	RGB(238,220,130)	UNKNOWN	SYBR	None
228	J12	HBx-PMH-D	RGB(0,0,255)			HBx	RGB(238,220,130)	UNKNOWN	SYBR	None
229	J13	Vec-PMH-L	RGB(0,139,69)			HBx	RGB(238,220,130)	UNKNOWN	SYBR	None
230	J14	Vec-PMH-L	RGB(0,139,69)			HBx	RGB(238,220,130)	UNKNOWN	SYBR	None
231	J15	Vec-PMH-L	RGB(0,139,69)			HBx	RGB(238,220,130)	UNKNOWN	SYBR	None
232	J16	HBx-PMH-L-L	RGB(255,127,0)			HBx	RGB(238,220,130)	UNKNOWN	SYBR	None
233	J17	HBx-PMH-L-L	RGB(255,127,0)			HBx	RGB(238,220,130)	UNKNOWN	SYBR	None
234	J18	HBx-PMH-L-L	RGB(255,127,0)			HBx	RGB(238,220,130)	UNKNOWN	SYBR	None
235	J19	HBx-PMH-H-L	RGB(139,137,112)			HBx	RGB(238,220,130)	UNKNOWN	SYBR	None
236	J20	HBx-PMH-H-L	RGB(139,137,112)			HBx	RGB(238,220,130)	UNKNOWN	SYBR	None
237	J21	HBx-PMH-H-L	RGB(139,137,112)			HBx	RGB(238,220,130)	UNKNOWN	SYBR	None
238	J22
239	J23
240	J24
241	K1
242	K2
243	K3
244	K4
245	K5
246	K6
247	K7	Vec-PMH-D	RGB(176,23,31)			mFAM110C	RGB(255,127,0)	UNKNOWN	SYBR	None
248	K8	Vec-PMH-D	RGB(176,23,31)			mFAM110C	RGB(255,127,0)	UNKNOWN	SYBR	None
249	K9	Vec-PMH-D	RGB(176,23,31)			mFAM110C	RGB(255,127,0)	UNKNOWN	SYBR	None
250	K10	HBx-PMH-D	RGB(0,0,255)			mFAM110C	RGB(255,127,0)	UNKNOWN	SYBR	None
251	K11	HBx-PMH-D	RGB(0,0,255)			mFAM110C	RGB(255,127,0)	UNKNOWN	SYBR	None
252	K12	HBx-PMH-D	RGB(0,0,255)			mFAM110C	RGB(255,127,0)	UNKNOWN	SYBR	None
253	K13	Vec-PMH-L	RGB(0,139,69)			mFAM110C	RGB(255,127,0)	UNKNOWN	SYBR	None
254	K14	Vec-PMH-L	RGB(0,139,69)			mFAM110C	RGB(255,127,0)	UNKNOWN	SYBR	None
255	K15	Vec-PMH-L	RGB(0,139,69)			mFAM110C	RGB(255,127,0)	UNKNOWN	SYBR	None
256	K16	HBx-PMH-L-L	RGB(255,127,0)			mFAM110C	RGB(255,127,0)	UNKNOWN	SYBR	None
257	K17	HBx-PMH-L-L	RGB(255,127,0)			mFAM110C	RGB(255,127,0)	UNKNOWN	SYBR	None
258	K18	HBx-PMH-L-L	RGB(255,127,0)			mFAM110C	RGB(255,127,0)	UNKNOWN	SYBR	None
259	K19	HBx-PMH-H-L	RGB(139,137,112)			mFAM110C	RGB(255,127,0)	UNKNOWN	SYBR	None
260	K20	HBx-PMH-H-L	RGB(139,137,112)			mFAM110C	RGB(255,127,0)	UNKNOWN	SYBR	None
261	K21	HBx-PMH-H-L	RGB(139,137,112)			mFAM110C	RGB(255,127,0)	UNKNOWN	SYBR	None
262	K22
263	K23
264	K24
265	L1
266	L2
267	L3
268	L4
269	L5
270	L6
271	L7	Vec-PMH-D	RGB(176,23,31)			mALDH8A1	RGB(142,142,56)	UNKNOWN	SYBR	None
272	L8	Vec-PMH-D	RGB(176,23,31)			mALDH8A1	RGB(142,142,56)	UNKNOWN	SYBR	None
273	L9	Vec-PMH-D	RGB(176,23,31)			mALDH8A1	RGB(142,142,56)	UNKNOWN	SYBR	None
274	L10	HBx-PMH-D	RGB(0,0,255)			mALDH8A1	RGB(142,142,56)	UNKNOWN	SYBR	None
275	L11	HBx-PMH-D	RGB(0,0,255)			mALDH8A1	RGB(142,142,56)	UNKNOWN	SYBR	None
276	L12	HBx-PMH-D	RGB(0,0,255)			mALDH8A1	RGB(142,142,56)	UNKNOWN	SYBR	None
277	L13	Vec-PMH-L	RGB(0,139,69)			mALDH8A1	RGB(142,142,56)	UNKNOWN	SYBR	None
278	L14	Vec-PMH-L	RGB(0,139,69)			mALDH8A1	RGB(142,142,56)	UNKNOWN	SYBR	None
279	L15	Vec-PMH-L	RGB(0,139,69)			mALDH8A1	RGB(142,142,56)	UNKNOWN	SYBR	None
280	L16	HBx-PMH-L-L	RGB(255,127,0)			mALDH8A1	RGB(142,142,56)	UNKNOWN	SYBR	None
281	L17	HBx-PMH-L-L	RGB(255,127,0)			mALDH8A1	RGB(142,142,56)	UNKNOWN	SYBR	None
282	L18	HBx-PMH-L-L	RGB(255,127,0)			mALDH8A1	RGB(142,142,56)	UNKNOWN	SYBR	None
283	L19	HBx-PMH-H-L	RGB(139,137,112)			mALDH8A1	RGB(142,142,56)	UNKNOWN	SYBR	None
284	L20	HBx-PMH-H-L	RGB(139,137,112)			mALDH8A1	RGB(142,142,56)	UNKNOWN	SYBR	None
285	L21	HBx-PMH-H-L	RGB(139,137,112)			mALDH8A1	RGB(142,142,56)	UNKNOWN	SYBR	None
286	L22
287	L23
288	L24
289	M1
290	M2
291	M3
292	M4
293	M5
294	M6
295	M7	Vec-PMH-D	RGB(176,23,31)			mC8A	RGB(238,44,44)	UNKNOWN	SYBR	None
296	M8	Vec-PMH-D	RGB(176,23,31)			mC8A	RGB(238,44,44)	UNKNOWN	SYBR	None
297	M9	Vec-PMH-D	RGB(176,23,31)			mC8A	RGB(238,44,44)	UNKNOWN	SYBR	None
298	M10	HBx-PMH-D	RGB(0,0,255)			mC8A	RGB(238,44,44)	UNKNOWN	SYBR	None
299	M11	HBx-PMH-D	RGB(0,0,255)			mC8A	RGB(238,44,44)	UNKNOWN	SYBR	None
300	M12	HBx-PMH-D	RGB(0,0,255)			mC8A	RGB(238,44,44)	UNKNOWN	SYBR	None
301	M13	Vec-PMH-L	RGB(0,139,69)			mC8A	RGB(238,44,44)	UNKNOWN	SYBR	None
302	M14	Vec-PMH-L	RGB(0,139,69)			mC8A	RGB(238,44,44)	UNKNOWN	SYBR	None
303	M15	Vec-PMH-L	RGB(0,139,69)			mC8A	RGB(238,44,44)	UNKNOWN	SYBR	None
304	M16	HBx-PMH-L-L	RGB(255,127,0)			mC8A	RGB(238,44,44)	UNKNOWN	SYBR	None
305	M17	HBx-PMH-L-L	RGB(255,127,0)			mC8A	RGB(238,44,44)	UNKNOWN	SYBR	None
306	M18	HBx-PMH-L-L	RGB(255,127,0)			mC8A	RGB(238,44,44)	UNKNOWN	SYBR	None
307	M19	HBx-PMH-H-L	RGB(139,137,112)			mC8A	RGB(238,44,44)	UNKNOWN	SYBR	None
308	M20	HBx-PMH-H-L	RGB(139,137,112)			mC8A	RGB(238,44,44)	UNKNOWN	SYBR	None
309	M21	HBx-PMH-H-L	RGB(139,137,112)			mC8A	RGB(238,44,44)	UNKNOWN	SYBR	None
310	M22
311	M23
312	M24
313	N1
314	N2
315	N3
316	N4
317	N5
318	N6
319	N7	Vec-PMH-D	RGB(176,23,31)			mCPEB3	RGB(51,161,201)	UNKNOWN	SYBR	None
320	N8	Vec-PMH-D	RGB(176,23,31)			mCPEB3	RGB(51,161,201)	UNKNOWN	SYBR	None
321	N9	Vec-PMH-D	RGB(176,23,31)			mCPEB3	RGB(51,161,201)	UNKNOWN	SYBR	None
322	N10	HBx-PMH-D	RGB(0,0,255)			mCPEB3	RGB(51,161,201)	UNKNOWN	SYBR	None
323	N11	HBx-PMH-D	RGB(0,0,255)			mCPEB3	RGB(51,161,201)	UNKNOWN	SYBR	None
324	N12	HBx-PMH-D	RGB(0,0,255)			mCPEB3	RGB(51,161,201)	UNKNOWN	SYBR	None
325	N13	Vec-PMH-L	RGB(0,139,69)			mCPEB3	RGB(51,161,201)	UNKNOWN	SYBR	None
326	N14	Vec-PMH-L	RGB(0,139,69)			mCPEB3	RGB(51,161,201)	UNKNOWN	SYBR	None
327	N15	Vec-PMH-L	RGB(0,139,69)			mCPEB3	RGB(51,161,201)	UNKNOWN	SYBR	None
328	N16	HBx-PMH-L-L	RGB(255,127,0)			mCPEB3	RGB(51,161,201)	UNKNOWN	SYBR	None
329	N17	HBx-PMH-L-L	RGB(255,127,0)			mCPEB3	RGB(51,161,201)	UNKNOWN	SYBR	None
330	N18	HBx-PMH-L-L	RGB(255,127,0)			mCPEB3	RGB(51,161,201)	UNKNOWN	SYBR	None
331	N19	HBx-PMH-H-L	RGB(139,137,112)			mCPEB3	RGB(51,161,201)	UNKNOWN	SYBR	None
332	N20	HBx-PMH-H-L	RGB(139,137,112)			mCPEB3	RGB(51,161,201)	UNKNOWN	SYBR	None
333	N21	HBx-PMH-H-L	RGB(139,137,112)			mCPEB3	RGB(51,161,201)	UNKNOWN	SYBR	None
334	N22
335	N23
336	N24
337	O1
338	O2
339	O3
340	O4
341	O5
342	O6
343	O7
344	O8
345	O9
346	O10
347	O11
348	O12
349	O13
350	O14
351	O15
352	O16
353	O17
354	O18
355	O19
356	O20
357	O21
358	O22
359	O23
360	O24
361	P1
362	P2
363	P3
364	P4
365	P5
366	P6
367	P7
368	P8
369	P9
370	P10
371	P11
372	P12
373	P13
374	P14
375	P15
376	P16
377	P17
378	P18
379	P19
380	P20
381	P21
382	P22
383	P23
384	P24

## Sheet: Amplification Data
Block Type	384-Well Block
Calibration Background is expired	Yes
Calibration Background performed on	10-12-2018 11:47:46 PDT
Calibration FAM is expired	Yes
Calibration FAM performed on	10-23-2018 10:23:19 PDT
Calibration MELTDOCTOR is expired	Yes
Calibration MELTDOCTOR performed on	09-26-2017 21:22:46 PDT
Calibration NED is expired	Yes
Calibration NED performed on	10-23-2018 10:33:14 PDT
Calibration ROI is expired	Yes
Calibration ROI performed on	10-12-2018 09:37:21 PDT
Calibration ROX is expired	Yes
Calibration ROX performed on	10-23-2018 10:07:21 PDT
Calibration SYBR is expired	Yes
Calibration SYBR performed on	10-23-2018 09:57:53 PDT
Calibration TAMRA is expired	Yes
Calibration TAMRA performed on	10-23-2018 10:45:25 PDT
Calibration Uniformity is expired	Yes
Calibration Uniformity performed on	10-12-2018 10:06:59 PDT
Calibration VIC is expired	Yes
Calibration VIC performed on	10-23-2018 10:54:25 PDT
Chemistry	SYBR_GREEN
Date Created	09-12-2021 23:22:23 PDT
Experiment File Name	D:\NZZ\2021-09-12 215735.eds
Experiment Name	2021-09-12 215735
Experiment Run End Time	09-12-2021 16:37:35 PDT
Experiment Type	Comparative Cт (ΔΔCт)
Instrument Name	285880860
Instrument Serial Number	285880860
Instrument Type	QuantStudio 12K Flex
Passive Reference	ROX
Quantification Cycle Method	Ct
Signal Smoothing On	true
Stage/ Cycle where Analysis is performed	Stage 2, Step 2
Well	Cycle	Target Name	Rn	Delta Rn
1	1
1	2
1	3
1	4
1	5
1	6
1	7
1	8
1	9
1	10
1	11
1	12
1	13
1	14
1	15
1	16
1	17
1	18
1	19
1	20
1	21
1	22
1	23
1	24
1	25
1	26
1	27
1	28
1	29
1	30
1	31
1	32
1	33
1	34
1	35
1	36
1	37
1	38
1	39
1	40
2	1
2	2
2	3
2	4
2	5
2	6
2	7
2	8
2	9
2	10
2	11
2	12
2	13
2	14
2	15
2	16
2	17
2	18
2	19
2	20
2	21
2	22
2	23
2	24
2	25
2	26
2	27
2	28
2	29
2	30
2	31
2	32
2	33
2	34
2	35
2	36
2	37
2	38
2	39
2	40
3	1
3	2
3	3
3	4
3	5
3	6
3	7
3	8
3	9
3	10
3	11
3	12
3	13
3	14
3	15
3	16
3	17
3	18
3	19
3	20
3	21
3	22
3	23
3	24
3	25
3	26
3	27
3	28
3	29
3	30
3	31
3	32
3	33
3	34
3	35
3	36
3	37
3	38
3	39
3	40
4	1
4	2
4	3
4	4
4	5
4	6
4	7
4	8
4	9
4	10
4	11
4	12
4	13
4	14
4	15
4	16
4	17
4	18
4	19
4	20
4	21
4	22
4	23
4	24
4	25
4	26
4	27
4	28
4	29
4	30
4	31
4	32
4	33
4	34
4	35
4	36
4	37
4	38
4	39
4	40
5	1
5	2
5	3
5	4
5	5
5	6
5	7
5	8
5	9
5	10
5	11
5	12
5	13
5	14
5	15
5	16
5	17
5	18
5	19
5	20
5	21
5	22
5	23
5	24
5	25
5	26
5	27
5	28
5	29
5	30
5	31
5	32
5	33
5	34
5	35
5	36
5	37
5	38
5	39
5	40
6	1
6	2
6	3
6	4
6	5
6	6
6	7
6	8
6	9
6	10
6	11
6	12
6	13
6	14
6	15
6	16
6	17
6	18
6	19
6	20
6	21
6	22
6	23
6	24
6	25
6	26
6	27
6	28
6	29
6	30
6	31
6	32
6	33
6	34
6	35
6	36
6	37
6	38
6	39
6	40
7	1	mARG1	0.14389	-0.00412379
7	2	mARG1	0.147195	-0.00136543
7	3	mARG1	0.148877	-0.000229666
7	4	mARG1	0.149781	0.000127956
7	5	mARG1	0.150962	0.000762098
7	6	mARG1	0.151716	0.000969352
7	7	mARG1	0.151887	0.000593867
7	8	mARG1	0.152104	0.000264277
7	9	mARG1	0.152563	0.000176533
7	10	mARG1	0.152615	-0.000317864
7	11	mARG1	0.152539	-0.0009398
7	12	mARG1	0.153176	-0.000849982
7	13	mARG1	0.153504	-0.00106775
7	14	mARG1	0.153364	-0.00175435
7	15	mARG1	0.154557	-0.00110788
7	16	mARG1	0.155481	-0.00073105
7	17	mARG1	0.157471	0.000713284
7	18	mARG1	0.160696	0.00339097
7	19	mARG1	0.167455	0.00960372
7	20	mARG1	0.181443	0.0230457
7	21	mARG1	0.207985	0.0490411
7	22	mARG1	0.256552	0.0970612
7	23	mARG1	0.344939	0.184902
7	24	mARG1	0.491002	0.330418
7	25	mARG1	0.699657	0.538527
7	26	mARG1	0.93772	0.776043
7	27	mARG1	1.13439	0.97217
7	28	mARG1	1.25588	1.09311
7	29	mARG1	1.34984	1.18652
7	30	mARG1	1.43429	1.27043
7	31	mARG1	1.50024	1.33583
7	32	mARG1	1.54505	1.38009
7	33	mARG1	1.57862	1.41311
7	34	mARG1	1.60725	1.4412
7	35	mARG1	1.62578	1.45919
7	36	mARG1	1.64351	1.47637
7	37	mARG1	1.65836	1.49067
7	38	mARG1	1.66967	1.50144
7	39	mARG1	1.67541	1.50663
7	40	mARG1	1.68594	1.51661
8	1	mARG1	0.116759	-0.00270603
8	2	mARG1	0.118146	-0.0018534
8	3	mARG1	0.119926	-0.000608487
8	4	mARG1	0.120756	-0.000313312
8	5	mARG1	0.121935	0.000330566
8	6	mARG1	0.12265	0.000510369
8	7	mARG1	0.123247	0.000572743
8	8	mARG1	0.123303	9.42429e-05
8	9	mARG1	0.124006	0.000262013
8	10	mARG1	0.124352	7.30649e-05
8	11	mARG1	0.124869	5.49433e-05
8	12	mARG1	0.125417	6.80695e-05
8	13	mARG1	0.125104	-0.000778922
8	14	mARG1	0.125552	-0.000865998
8	15	mARG1	0.126397	-0.000556063
8	16	mARG1	0.127472	-1.63526e-05
8	17	mARG1	0.129196	0.00117312
8	18	mARG1	0.133039	0.00448071
8	19	mARG1	0.140751	0.0116583
8	20	mARG1	0.155783	0.0261552
8	21	mARG1	0.184513	0.0543509
8	22	mARG1	0.236397	0.1057
8	23	mARG1	0.330885	0.199653
8	24	mARG1	0.484937	0.35317
8	25	mARG1	0.704299	0.571997
8	26	mARG1	0.951661	0.818824
8	27	mARG1	1.1529	1.01952
8	28	mARG1	1.27965	1.14575
8	29	mARG1	1.37826	1.24382
8	30	mARG1	1.46673	1.33176
8	31	mARG1	1.53333	1.39782
8	32	mARG1	1.57865	1.44261
8	33	mARG1	1.61271	1.47613
8	34	mARG1	1.6403	1.50319
8	35	mARG1	1.66211	1.52446
8	36	mARG1	1.68135	1.54316
8	37	mARG1	1.69451	1.55579
8	38	mARG1	1.70538	1.56613
8	39	mARG1	1.71592	1.57613
8	40	mARG1	1.72103	1.5807
9	1	mARG1	0.100708	-0.00167676
9	2	mARG1	0.100416	-0.000855553
9	3	mARG1	0.0992082	-0.000950413
9	4	mARG1	0.0979372	-0.00110823
9	5	mARG1	0.0971416	-0.000790611
9	6	mARG1	0.0969415	0.000122429
9	7	mARG1	0.0975912	0.0018853
9	8	mARG1	0.097421	0.00282824
9	9	mARG1	0.0953498	0.0018702
9	10	mARG1	0.0932921	0.000925694
9	11	mARG1	0.0911779	-7.5365e-05
9	12	mARG1	0.0891306	-0.00100946
9	13	mARG1	0.0870811	-0.00194579
9	14	mARG1	0.0853995	-0.00251422
9	15	mARG1	0.0845607	-0.00223983
9	16	mARG1	0.0846434	-0.001044
9	17	mARG1	0.0850741	0.000499877
9	18	mARG1	0.0870072	0.00354619
9	19	mARG1	0.0928434	0.0104955
9	20	mARG1	0.105981	0.0247463
9	21	mARG1	0.131476	0.0513549
9	22	mARG1	0.181078	0.102069
9	23	mARG1	0.271513	0.193618
9	24	mARG1	0.419601	0.342819
9	25	mARG1	0.628678	0.553009
9	26	mARG1	0.863451	0.788895
9	27	mARG1	1.05238	0.978938
9	28	mARG1	1.17389	1.10156
9	29	mARG1	1.26753	1.19632
9	30	mARG1	1.34754	1.27744
9	31	mARG1	1.40813	1.33914
9	32	mARG1	1.45426	1.38638
9	33	mARG1	1.48612	1.41936
9	34	mARG1	1.51115	1.4455
9	35	mARG1	1.53156	1.46703
9	36	mARG1	1.54669	1.48327
9	37	mARG1	1.56093	1.49862
9	38	mARG1	1.57166	1.51046
9	39	mARG1	1.57788	1.5178
9	40	mARG1	1.57998	1.521
10	1	mARG1	-0.0385265	-0.00314077
10	2	mARG1	-0.0368806	-0.00206191
10	3	mARG1	-0.0345965	-0.000344952
10	4	mARG1	-0.033324	0.000360491
10	5	mARG1	-0.0326215	0.000495976
10	6	mARG1	-0.0320947	0.000455653
10	7	mARG1	-0.0316741	0.000309178
10	8	mARG1	-0.0312829	0.00013334
10	9	mARG1	-0.0305333	0.000315868
10	10	mARG1	-0.030042	0.000240025
10	11	mARG1	-0.0300947	-0.000379698
10	12	mARG1	-0.0302071	-0.00105921
10	13	mARG1	-0.0294722	-0.00089138
10	14	mARG1	-0.0287898	-0.000776053
10	15	mARG1	-0.0284505	-0.00100385
10	16	mARG1	-0.0277818	-0.000902229
10	17	mARG1	-0.0262078	0.000104757
10	18	mARG1	-0.0228034	0.00294208
10	19	mARG1	-0.0173874	0.007791
10	20	mARG1	-0.00725953	0.0173518
10	21	mARG1	0.0135133	0.0375575
10	22	mARG1	0.0529018	0.076379
10	23	mARG1	0.125918	0.148828
10	24	mARG1	0.249898	0.272241
10	25	mARG1	0.440108	0.461884
10	26	mARG1	0.68316	0.704369
10	27	mARG1	0.915865	0.936507
10	28	mARG1	1.0779	1.09797
10	29	mARG1	1.18434	1.20385
10	30	mARG1	1.27923	1.29817
10	31	mARG1	1.35271	1.37108
10	32	mARG1	1.40404	1.42184
10	33	mARG1	1.44156	1.4588
10	34	mARG1	1.47368	1.49035
10	35	mARG1	1.49542	1.51152
10	36	mARG1	1.5131	1.52864
10	37	mARG1	1.5296	1.54457
10	38	mARG1	1.54262	1.55702
10	39	mARG1	1.55153	1.56537
10	40	mARG1	1.56251	1.57578
11	1	mARG1	0.143993	-0.00401207
11	2	mARG1	0.145428	-0.00315342
11	3	mARG1	0.147982	-0.00117646
11	4	mARG1	0.149675	-5.94072e-05
11	5	mARG1	0.150616	0.000305243
11	6	mARG1	0.151846	0.000958798
11	7	mARG1	0.152368	0.000904085
11	8	mARG1	0.152958	0.000917962
11	9	mARG1	0.153074	0.000457565
11	10	mARG1	0.153289	9.65443e-05
11	11	mARG1	0.1534	-0.000369038
11	12	mARG1	0.153898	-0.000447116
11	13	mARG1	0.153722	-0.0011995
11	14	mARG1	0.154303	-0.00119526
11	15	mARG1	0.154873	-0.0012018
11	16	mARG1	0.155779	-0.000871275
11	17	mARG1	0.157609	0.000382379
11	18	mARG1	0.160301	0.00249729
11	19	mARG1	0.166098	0.00771796
11	20	mARG1	0.177028	0.0180715
11	21	mARG1	0.197699	0.0381666
11	22	mARG1	0.236996	0.0768873
11	23	mARG1	0.30975	0.149065
11	24	mARG1	0.434125	0.272864
11	25	mARG1	0.62371	0.461872
11	26	mARG1	0.863807	0.701392
11	27	mARG1	1.08874	0.92575
11	28	mARG1	1.2475	1.08393
11	29	mARG1	1.35286	1.18871
11	30	mARG1	1.44454	1.27982
11	31	mARG1	1.52206	1.35676
11	32	mARG1	1.57807	1.4122
11	33	mARG1	1.61788	1.45143
11	34	mARG1	1.64866	1.48163
11	35	mARG1	1.67341	1.50581
11	36	mARG1	1.69118	1.52301
11	37	mARG1	1.70284	1.53408
11	38	mARG1	1.71953	1.5502
11	39	mARG1	1.72713	1.55722
11	40	mARG1	1.73458	1.56409
12	1	mARG1	0.10152	0.000310718
12	2	mARG1	0.101572	7.40813e-05
12	3	mARG1	0.102113	0.000326895
12	4	mARG1	0.10232	0.000245976
12	5	mARG1	0.103049	0.000686083
12	6	mARG1	0.103427	0.000775461
12	7	mARG1	0.103461	0.000521687
12	8	mARG1	0.103347	0.000119283
12	9	mARG1	0.103497	-1.95058e-05
12	10	mARG1	0.103515	-0.000289372
12	11	mARG1	0.103515	-0.000577716
12	12	mARG1	0.103096	-0.00128523
12	13	mARG1	0.102966	-0.00170362
12	14	mARG1	0.10336	-0.00159735
12	15	mARG1	0.103768	-0.00147824
12	16	mARG1	0.105031	-0.000503377
12	17	mARG1	0.106915	0.00109179
12	18	mARG1	0.109798	0.00368723
12	19	mARG1	0.115698	0.00929818
12	20	mARG1	0.127502	0.0208146
12	21	mARG1	0.149813	0.0428372
12	22	mARG1	0.19195	0.0846852
12	23	mARG1	0.268042	0.160489
12	24	mARG1	0.39776	0.289919
12	25	mARG1	0.593205	0.485076
12	26	mARG1	0.831695	0.723278
12	27	mARG1	1.04449	0.935788
12	28	mARG1	1.18524	1.07625
12	29	mARG1	1.28186	1.17258
12	30	mARG1	1.36866	1.25909
12	31	mARG1	1.43986	1.33
12	32	mARG1	1.48796	1.37782
12	33	mARG1	1.52262	1.41219
12	34	mARG1	1.55206	1.44133
12	35	mARG1	1.57531	1.4643
12	36	mARG1	1.59432	1.48302
12	37	mARG1	1.61146	1.49987
12	38	mARG1	1.62543	1.51355
12	39	mARG1	1.63338	1.52121
12	40	mARG1	1.64126	1.5288
13	1	mARG1	0.156244	-0.00468273
13	2	mARG1	0.156733	-0.00455431
13	3	mARG1	0.158901	-0.00274846
13	4	mARG1	0.160765	-0.00124486
13	5	mARG1	0.161631	-0.000740732
13	6	mARG1	0.163575	0.000841717
13	7	mARG1	0.164671	0.00157689
13	8	mARG1	0.164858	0.00140284
13	9	mARG1	0.165137	0.00132074
13	10	mARG1	0.165644	0.00146659
13	11	mARG1	0.165301	0.000762005
13	12	mARG1	0.165392	0.000491717
13	13	mARG1	0.165894	0.000632299
13	14	mARG1	0.16619	0.000566635
13	15	mARG1	0.165818	-0.000166378
13	16	mARG1	0.165812	-0.000533538
13	17	mARG1	0.165917	-0.000789714
13	18	mARG1	0.166082	-0.000986449
13	19	mARG1	0.16602	-0.00140949
13	20	mARG1	0.166759	-0.00103146
13	21	mARG1	0.167278	-0.000873663
13	22	mARG1	0.167731	-0.000782523
13	23	mARG1	0.168	-0.000874771
13	24	mARG1	0.169317	8.07556e-05
13	25	mARG1	0.172637	0.00303985
13	26	mARG1	0.179266	0.00930806
13	27	mARG1	0.190663	0.0203437
13	28	mARG1	0.212297	0.0416162
13	29	mARG1	0.254019	0.0829769
13	30	mARG1	0.328841	0.157437
13	31	mARG1	0.455873	0.284108
13	32	mARG1	0.647288	0.475162
13	33	mARG1	0.883437	0.710949
13	34	mARG1	1.0975	0.924654
13	35	mARG1	1.24	1.06679
13	36	mARG1	1.33628	1.16271
13	37	mARG1	1.42014	1.2462
13	38	mARG1	1.48677	1.31248
13	39	mARG1	1.53538	1.36072
13	40	mARG1	1.56568	1.39066
14	1	mARG1	0.12488	-0.00290858
14	2	mARG1	0.126269	-0.0017964
14	3	mARG1	0.12829	-5.21961e-05
14	4	mARG1	0.129027	0.000409017
14	5	mARG1	0.129206	0.000310871
14	6	mARG1	0.129677	0.000505726
14	7	mARG1	0.129867	0.000418636
14	8	mARG1	0.130002	0.000277455
14	9	mARG1	0.130669	0.000667948
14	10	mARG1	0.130705	0.000427391
14	11	mARG1	0.130511	-4.34186e-05
14	12	mARG1	0.130909	7.88381e-05
14	13	mARG1	0.131196	8.91125e-05
14	14	mARG1	0.131058	-0.000325073
14	15	mARG1	0.131153	-0.000507411
14	16	mARG1	0.131762	-0.000174153
14	17	mARG1	0.131615	-0.000598218
14	18	mARG1	0.131274	-0.0012153
14	19	mARG1	0.131459	-0.00130686
14	20	mARG1	0.131665	-0.00137735
14	21	mARG1	0.131896	-0.00142285
14	22	mARG1	0.132359	-0.0012367
14	23	mARG1	0.132978	-0.000893633
14	24	mARG1	0.134137	-1.11787e-05
14	25	mARG1	0.135739	0.00131338
14	26	mARG1	0.139368	0.00466595
14	27	mARG1	0.145168	0.0101903
14	28	mARG1	0.157087	0.0218323
14	29	mARG1	0.180424	0.0448925
14	30	mARG1	0.224946	0.0891386
14	31	mARG1	0.304481	0.168397
14	32	mARG1	0.438399	0.302038
14	33	mARG1	0.634579	0.497942
14	34	mARG1	0.868054	0.731141
14	35	mARG1	1.06791	0.930718
14	36	mARG1	1.19856	1.06109
14	37	mARG1	1.29182	1.15408
14	38	mARG1	1.37705	1.23903
14	39	mARG1	1.43968	1.30139
14	40	mARG1	1.48183	1.34326
15	1	mARG1	0.136	-0.00366899
15	2	mARG1	0.136018	-0.00399467
15	3	mARG1	0.137675	-0.00268171
15	4	mARG1	0.139512	-0.00118932
15	5	mARG1	0.140879	-0.000165745
15	6	mARG1	0.141837	0.000448301
15	7	mARG1	0.142393	0.000659599
15	8	mARG1	0.142984	0.000907165
15	9	mARG1	0.143412	0.000991356
15	10	mARG1	0.143948	0.00118346
15	11	mARG1	0.144412	0.00130322
15	12	mARG1	0.14471	0.0012568
15	13	mARG1	0.144349	0.000551917
15	14	mARG1	0.144218	7.67773e-05
15	15	mARG1	0.144788	0.000303155
15	16	mARG1	0.145109	0.000280027
15	17	mARG1	0.144835	-0.000337851
15	18	mARG1	0.145109	-0.000407574
15	19	mARG1	0.144562	-0.00129831
15	20	mARG1	0.144785	-0.0014198
15	21	mARG1	0.145489	-0.00105943
15	22	mARG1	0.145723	-0.00117004
15	23	mARG1	0.146416	-0.000821071
15	24	mARG1	0.147675	9.42016e-05
15	25	mARG1	0.15042	0.00249487
15	26	mARG1	0.154241	0.00597208
15	27	mARG1	0.161883	0.0132708
15	28	mARG1	0.176917	0.0279604
15	29	mARG1	0.205934	0.0566329
15	30	mARG1	0.259137	0.109492
15	31	mARG1	0.354424	0.204436
15	32	mARG1	0.509537	0.359204
15	33	mARG1	0.727732	0.577055
15	34	mARG1	0.96682	0.815799
15	35	mARG1	1.15412	1.00275
15	36	mARG1	1.27424	1.12254
15	37	mARG1	1.36723	1.21517
15	38	mARG1	1.44706	1.29466
15	39	mARG1	1.50688	1.35414
15	40	mARG1	1.54557	1.39249
16	1	mARG1	0.128287	-0.0062474
16	2	mARG1	0.129867	-0.0050465
16	3	mARG1	0.13269	-0.00260321
16	4	mARG1	0.13424	-0.00143245
16	5	mARG1	0.136034	-1.84125e-05
16	6	mARG1	0.136934	0.000502603
16	7	mARG1	0.137787	0.000975443
16	8	mARG1	0.138107	0.000916639
16	9	mARG1	0.138566	0.000995984
16	10	mARG1	0.139057	0.00110704
16	11	mARG1	0.139194	0.000864533
16	12	mARG1	0.139003	0.000294456
16	13	mARG1	0.139998	0.0009099
16	14	mARG1	0.140145	0.00067714
16	15	mARG1	0.140154	0.000306738
16	16	mARG1	0.140386	0.000159108
16	17	mARG1	0.140275	-0.000331024
16	18	mARG1	0.140304	-0.00068134
16	19	mARG1	0.140633	-0.00073241
16	20	mARG1	0.140667	-0.00107721
16	21	mARG1	0.140931	-0.00119271
16	22	mARG1	0.141656	-0.000847339
16	23	mARG1	0.141954	-0.000929328
16	24	mARG1	0.143323	6.02389e-05
16	25	mARG1	0.145718	0.00207562
16	26	mARG1	0.150171	0.00614953
16	27	mARG1	0.15714	0.0127393
16	28	mARG1	0.172376	0.0275958
16	29	mARG1	0.201756	0.0565966
16	30	mARG1	0.256424	0.110884
16	31	mARG1	0.353967	0.208048
16	32	mARG1	0.512754	0.366456
16	33	mARG1	0.736304	0.589626
16	34	mARG1	0.981931	0.834873
16	35	mARG1	1.17623	1.02879
16	36	mARG1	1.3002	1.15238
16	37	mARG1	1.39743	1.24924
16	38	mARG1	1.4832	1.33463
16	39	mARG1	1.54552	1.39656
16	40	mARG1	1.58115	1.43181
17	1	mARG1	0.149127	-0.00947196
17	2	mARG1	0.153497	-0.00558731
17	3	mARG1	0.155872	-0.00369843
17	4	mARG1	0.15784	-0.00221724
17	5	mARG1	0.159735	-0.000808447
17	6	mARG1	0.161527	0.000497511
17	7	mARG1	0.162674	0.00115807
17	8	mARG1	0.163077	0.001075
17	9	mARG1	0.163724	0.00123643
17	10	mARG1	0.164474	0.00150019
17	11	mARG1	0.165331	0.00187059
17	12	mARG1	0.165775	0.00182893
17	13	mARG1	0.165567	0.00113447
17	14	mARG1	0.165937	0.00101884
17	15	mARG1	0.16605	0.000645812
17	16	mARG1	0.166151	0.000260384
17	17	mARG1	0.166261	-0.000116356
17	18	mARG1	0.166336	-0.000526699
17	19	mARG1	0.165975	-0.00137403
17	20	mARG1	0.166518	-0.00131737
17	21	mARG1	0.166753	-0.00156857
17	22	mARG1	0.167477	-0.00133024
17	23	mARG1	0.168948	-0.000346204
17	24	mARG1	0.169837	5.71167e-05
17	25	mARG1	0.171286	0.00102024
17	26	mARG1	0.175814	0.00506156
17	27	mARG1	0.184238	0.0129997
17	28	mARG1	0.200313	0.0285885
17	29	mARG1	0.230537	0.0583267
17	30	mARG1	0.286508	0.113811
17	31	mARG1	0.384593	0.21141
17	32	mARG1	0.544303	0.370634
17	33	mARG1	0.764817	0.590662
17	34	mARG1	0.99845	0.823809
17	35	mARG1	1.17902	1.00389
17	36	mARG1	1.29247	1.11686
17	37	mARG1	1.38491	1.20881
17	38	mARG1	1.46229	1.28571
17	39	mARG1	1.51961	1.34254
17	40	mARG1	1.55391	1.37635
18	1	mARG1	0.159779	-0.0121791
18	2	mARG1	0.162588	-0.00989246
18	3	mARG1	0.167995	-0.00500702
18	4	mARG1	0.171308	-0.00221647
18	5	mARG1	0.174399	0.00035305
18	6	mARG1	0.17628	0.00171196
18	7	mARG1	0.176525	0.00143507
18	8	mARG1	0.177096	0.00148318
18	9	mARG1	0.177827	0.00169267
18	10	mARG1	0.178317	0.00166042
18	11	mARG1	0.178245	0.00106697
18	12	mARG1	0.178776	0.00107594
18	13	mARG1	0.179356	0.00113324
18	14	mARG1	0.179089	0.000344738
18	15	mARG1	0.179683	0.000416436
18	16	mARG1	0.179694	-9.43228e-05
18	17	mARG1	0.180162	-0.000148569
18	18	mARG1	0.180011	-0.000821318
18	19	mARG1	0.179979	-0.00137553
18	20	mARG1	0.180273	-0.00160325
18	21	mARG1	0.180705	-0.00169279
18	22	mARG1	0.181669	-0.00125144
18	23	mARG1	0.182412	-0.0010304
18	24	mARG1	0.184204	0.000240173
18	25	mARG1	0.187114	0.00262727
18	26	mARG1	0.193957	0.00894849
18	27	mARG1	0.206357	0.0208266
18	28	mARG1	0.229286	0.043234
18	29	mARG1	0.273876	0.0873016
18	30	mARG1	0.354653	0.167557
18	31	mARG1	0.490318	0.302699
18	32	mARG1	0.696289	0.508149
18	33	mARG1	0.952089	0.763427
18	34	mARG1	1.18398	0.994791
18	35	mARG1	1.33857	1.14887
18	36	mARG1	1.44352	1.25329
18	37	mARG1	1.53675	1.346
18	38	mARG1	1.60842	1.41715
18	39	mARG1	1.6602	1.46841
18	40	mARG1	1.68908	1.49677
19	1	mARG1	0.16562	-0.0130417
19	2	mARG1	0.169056	-0.010539
19	3	mARG1	0.177114	-0.00341479
19	4	mARG1	0.178989	-0.00247385
19	5	mARG1	0.181352	-0.00104542
19	6	mARG1	0.183224	-0.000107769
19	7	mARG1	0.185127	0.000861707
19	8	mARG1	0.186398	0.00119833
19	9	mARG1	0.18726	0.0011266
19	10	mARG1	0.188153	0.00108601
19	11	mARG1	0.189211	0.0012098
19	12	mARG1	0.190259	0.00132329
19	13	mARG1	0.191879	0.00200988
19	14	mARG1	0.192185	0.00138161
19	15	mARG1	0.193272	0.00153433
19	16	mARG1	0.19405	0.00137878
19	17	mARG1	0.194309	0.000703394
19	18	mARG1	0.194463	-7.59151e-05
19	19	mARG1	0.194518	-0.00095536
19	20	mARG1	0.195315	-0.00109189
19	21	mARG1	0.195585	-0.00175646
19	22	mARG1	0.196737	-0.00153774
19	23	mARG1	0.19781	-0.00139882
19	24	mARG1	0.199301	-0.000841971
19	25	mARG1	0.201963	0.000886243
19	26	mARG1	0.206857	0.00484607
19	27	mARG1	0.215158	0.0122129
19	28	mARG1	0.232375	0.028496
19	29	mARG1	0.265345	0.0605315
19	30	mARG1	0.325854	0.120106
19	31	mARG1	0.430988	0.224307
19	32	mARG1	0.597431	0.389816
19	33	mARG1	0.818315	0.609766
19	34	mARG1	1.04179	0.832307
19	35	mARG1	1.20378	0.993363
19	36	mARG1	1.30668	1.09533
19	37	mARG1	1.39679	1.1845
19	38	mARG1	1.47115	1.25793
19	39	mARG1	1.52439	1.31023
19	40	mARG1	1.557	1.34191
20	1	mARG1	0.179937	-0.0118473
20	2	mARG1	0.182649	-0.00974597
20	3	mARG1	0.188431	-0.00457394
20	4	mARG1	0.191053	-0.00256292
20	5	mARG1	0.193428	-0.000797887
20	6	mARG1	0.196135	0.0012984
20	7	mARG1	0.197243	0.00179668
20	8	mARG1	0.197546	0.00148924
20	9	mARG1	0.19853	0.00186296
20	10	mARG1	0.198976	0.00169866
20	11	mARG1	0.199223	0.0013357
20	12	mARG1	0.199898	0.00139971
20	13	mARG1	0.200382	0.00127389
20	14	mARG1	0.200169	0.000450302
20	15	mARG1	0.200522	0.000193097
20	16	mARG1	0.201378	0.000438747
20	17	mARG1	0.201466	-8.39364e-05
20	18	mARG1	0.201702	-0.000458354
20	19	mARG1	0.201956	-0.000813846
20	20	mARG1	0.201975	-0.0014053
20	21	mARG1	0.202284	-0.00170654
20	22	mARG1	0.203181	-0.00141968
20	23	mARG1	0.203678	-0.00153375
20	24	mARG1	0.20554	-0.000281839
20	25	mARG1	0.208833	0.00240061
20	26	mARG1	0.214462	0.00741975
20	27	mARG1	0.225206	0.0175531
20	28	mARG1	0.246306	0.0380431
20	29	mARG1	0.286669	0.0777953
20	30	mARG1	0.360437	0.150953
20	31	mARG1	0.48701	0.276917
20	32	mARG1	0.682721	0.472017
20	33	mARG1	0.933183	0.721868
20	34	mARG1	1.17099	0.959068
20	35	mARG1	1.33048	1.11794
20	36	mARG1	1.43849	1.22534
20	37	mARG1	1.53735	1.3236
20	38	mARG1	1.61385	1.39949
20	39	mARG1	1.66643	1.45145
20	40	mARG1	1.70228	1.48669
21	1	mARG1	0.126016	-0.00622167
21	2	mARG1	0.127659	-0.00569103
21	3	mARG1	0.130298	-0.00416372
21	4	mARG1	0.133185	-0.00238892
21	5	mARG1	0.135469	-0.0012181
21	6	mARG1	0.137304	-0.000494555
21	7	mARG1	0.139363	0.000451526
21	8	mARG1	0.140979	0.00095549
21	9	mARG1	0.142277	0.00114105
21	10	mARG1	0.143857	0.00160916
21	11	mARG1	0.14523	0.00186925
21	12	mARG1	0.146542	0.00206968
21	13	mARG1	0.148115	0.00253035
21	14	mARG1	0.148466	0.00176884
21	15	mARG1	0.149162	0.0013528
21	16	mARG1	0.150203	0.00128109
21	17	mARG1	0.150993	0.000958963
21	18	mARG1	0.15139	0.000242999
21	19	mARG1	0.151551	-0.000707689
21	20	mARG1	0.152268	-0.00110271
21	21	mARG1	0.152612	-0.0018712
21	22	mARG1	0.153562	-0.00203418
21	23	mARG1	0.154737	-0.00197101
21	24	mARG1	0.156545	-0.00127525
21	25	mARG1	0.159929	0.000996166
21	26	mARG1	0.166608	0.00656328
21	27	mARG1	0.179874	0.0187171
21	28	mARG1	0.204761	0.0424917
21	29	mARG1	0.252492	0.0891099
21	30	mARG1	0.33789	0.173396
21	31	mARG1	0.480247	0.314641
21	32	mARG1	0.686519	0.519801
21	33	mARG1	0.924782	0.756951
21	34	mARG1	1.1231	0.954156
21	35	mARG1	1.24626	1.07621
21	36	mARG1	1.33773	1.16657
21	37	mARG1	1.41909	1.2468
21	38	mARG1	1.481	1.30761
21	39	mARG1	1.52389	1.34938
21	40	mARG1	1.55025	1.37464
22	1
22	2
22	3
22	4
22	5
22	6
22	7
22	8
22	9
22	10
22	11
22	12
22	13
22	14
22	15
22	16
22	17
22	18
22	19
22	20
22	21
22	22
22	23
22	24
22	25
22	26
22	27
22	28
22	29
22	30
22	31
22	32
22	33
22	34
22	35
22	36
22	37
22	38
22	39
22	40
23	1
23	2
23	3
23	4
23	5
23	6
23	7
23	8
23	9
23	10
23	11
23	12
23	13
23	14
23	15
23	16
23	17
23	18
23	19
23	20
23	21
23	22
23	23
23	24
23	25
23	26
23	27
23	28
23	29
23	30
23	31
23	32
23	33
23	34
23	35
23	36
23	37
23	38
23	39
23	40
24	1
24	2
24	3
24	4
24	5
24	6
24	7
24	8
24	9
24	10
24	11
24	12
24	13
24	14
24	15
24	16
24	17
24	18
24	19
24	20
24	21
24	22
24	23
24	24
24	25
24	26
24	27
24	28
24	29
24	30
24	31
24	32
24	33
24	34
24	35
24	36
24	37
24	38
24	39
24	40
25	1
25	2
25	3
25	4
25	5
25	6
25	7
25	8
25	9
25	10
25	11
25	12
25	13
25	14
25	15
25	16
25	17
25	18
25	19
25	20
25	21
25	22
25	23
25	24
25	25
25	26
25	27
25	28
25	29
25	30
25	31
25	32
25	33
25	34
25	35
25	36
25	37
25	38
25	39
25	40
26	1
26	2
26	3
26	4
26	5
26	6
26	7
26	8
26	9
26	10
26	11
26	12
26	13
26	14
26	15
26	16
26	17
26	18
26	19
26	20
26	21
26	22
26	23
26	24
26	25
26	26
26	27
26	28
26	29
26	30
26	31
26	32
26	33
26	34
26	35
26	36
26	37
26	38
26	39
26	40
27	1
27	2
27	3
27	4
27	5
27	6
27	7
27	8
27	9
27	10
27	11
27	12
27	13
27	14
27	15
27	16
27	17
27	18
27	19
27	20
27	21
27	22
27	23
27	24
27	25
27	26
27	27
27	28
27	29
27	30
27	31
27	32
27	33
27	34
27	35
27	36
27	37
27	38
27	39
27	40
28	1
28	2
28	3
28	4
28	5
28	6
28	7
28	8
28	9
28	10
28	11
28	12
28	13
28	14
28	15
28	16
28	17
28	18
28	19
28	20
28	21
28	22
28	23
28	24
28	25
28	26
28	27
28	28
28	29
28	30
28	31
28	32
28	33
28	34
28	35
28	36
28	37
28	38
28	39
28	40
29	1
29	2
29	3
29	4
29	5
29	6
29	7
29	8
29	9
29	10
29	11
29	12
29	13
29	14
29	15
29	16
29	17
29	18
29	19
29	20
29	21
29	22
29	23
29	24
29	25
29	26
29	27
29	28
29	29
29	30
29	31
29	32
29	33
29	34
29	35
29	36
29	37
29	38
29	39
29	40
30	1
30	2
30	3
30	4
30	5
30	6
30	7
30	8
30	9
30	10
30	11
30	12
30	13
30	14
30	15
30	16
30	17
30	18
30	19
30	20
30	21
30	22
30	23
30	24
30	25
30	26
30	27
30	28
30	29
30	30
30	31
30	32
30	33
30	34
30	35
30	36
30	37
30	38
30	39
30	40
31	1	mANGPTL6	0.217692	-0.0138057
31	2	mANGPTL6	0.223283	-0.00937259
31	3	mANGPTL6	0.230282	-0.00353053
31	4	mANGPTL6	0.23414	-0.000829579
31	5	mANGPTL6	0.236029	-9.77981e-05
31	6	mANGPTL6	0.237933	0.000649331
31	7	mANGPTL6	0.239761	0.00131993
31	8	mANGPTL6	0.240786	0.00118732
31	9	mANGPTL6	0.242156	0.00140018
31	10	mANGPTL6	0.243633	0.00171968
31	11	mANGPTL6	0.244648	0.00157781
31	12	mANGPTL6	0.244826	0.000598113
31	13	mANGPTL6	0.245378	-6.80005e-06
31	14	mANGPTL6	0.246581	3.90802e-05
31	15	mANGPTL6	0.247226	-0.000472701
31	16	mANGPTL6	0.247778	-0.00107796
31	17	mANGPTL6	0.248864	-0.00114921
31	18	mANGPTL6	0.249723	-0.00144779
31	19	mANGPTL6	0.250443	-0.00188478
31	20	mANGPTL6	0.252885	-0.000600063
31	21	mANGPTL6	0.257248	0.00260577
31	22	mANGPTL6	0.263707	0.00790746
31	23	mANGPTL6	0.276298	0.0193414
31	24	mANGPTL6	0.301533	0.0434191
31	25	mANGPTL6	0.346327	0.0870554
31	26	mANGPTL6	0.428096	0.167668
31	27	mANGPTL6	0.56346	0.301875
31	28	mANGPTL6	0.760234	0.49749
31	29	mANGPTL6	1.00136	0.737459
31	30	mANGPTL6	1.23118	0.966123
31	31	mANGPTL6	1.41313	1.14691
31	32	mANGPTL6	1.53596	1.26858
31	33	mANGPTL6	1.61387	1.34534
31	34	mANGPTL6	1.66418	1.39449
31	35	mANGPTL6	1.69848	1.42764
31	36	mANGPTL6	1.72005	1.44805
31	37	mANGPTL6	1.73813	1.46497
31	38	mANGPTL6	1.75187	1.47755
31	39	mANGPTL6	1.76303	1.48756
31	40	mANGPTL6	1.76999	1.49336
32	1	mANGPTL6	0.098592	-0.00441863
32	2	mANGPTL6	0.100305	-0.00317076
32	3	mANGPTL6	0.102761	-0.00117892
32	4	mANGPTL6	0.105097	0.000691432
32	5	mANGPTL6	0.106541	0.00167128
32	6	mANGPTL6	0.106451	0.00111606
32	7	mANGPTL6	0.106354	0.000554725
32	8	mANGPTL6	0.106586	0.000321759
32	9	mANGPTL6	0.106667	-6.24761e-05
32	10	mANGPTL6	0.106705	-0.000489649
32	11	mANGPTL6	0.107169	-0.000489605
32	12	mANGPTL6	0.107497	-0.000627115
32	13	mANGPTL6	0.108144	-0.000445039
32	14	mANGPTL6	0.108394	-0.000659691
32	15	mANGPTL6	0.108601	-0.000917773
32	16	mANGPTL6	0.108683	-0.00130007
32	17	mANGPTL6	0.1089	-0.00154842
32	18	mANGPTL6	0.109966	-0.000947311
32	19	mANGPTL6	0.110834	-0.000543937
32	20	mANGPTL6	0.112863	0.00102033
32	21	mANGPTL6	0.116142	0.00383442
32	22	mANGPTL6	0.122108	0.00933569
32	23	mANGPTL6	0.134022	0.0207844
32	24	mANGPTL6	0.15711	0.0434083
32	25	mANGPTL6	0.200471	0.0863041
32	26	mANGPTL6	0.279268	0.164636
32	27	mANGPTL6	0.411696	0.2966
32	28	mANGPTL6	0.614677	0.499116
32	29	mANGPTL6	0.872777	0.756751
32	30	mANGPTL6	1.13805	1.02156
32	31	mANGPTL6	1.36152	1.24456
32	32	mANGPTL6	1.51667	1.39925
32	33	mANGPTL6	1.6163	1.49841
32	34	mANGPTL6	1.68001	1.56166
32	35	mANGPTL6	1.72121	1.60239
32	36	mANGPTL6	1.75262	1.63334
32	37	mANGPTL6	1.77491	1.65516
32	38	mANGPTL6	1.78938	1.66917
32	39	mANGPTL6	1.80365	1.68298
32	40	mANGPTL6	1.81055	1.68941
33	1	mANGPTL6	0.0996119	-0.00172652
33	2	mANGPTL6	0.1003	-0.00161525
33	3	mANGPTL6	0.101435	-0.00105734
33	4	mANGPTL6	0.102897	-0.000172583
33	5	mANGPTL6	0.104387	0.000740497
33	6	mANGPTL6	0.104828	0.000605131
33	7	mANGPTL6	0.105521	0.000721618
33	8	mANGPTL6	0.105946	0.000568974
33	9	mANGPTL6	0.10663	0.000676877
33	10	mANGPTL6	0.107003	0.000472773
33	11	mANGPTL6	0.106796	-0.000311412
33	12	mANGPTL6	0.107387	-0.000297736
33	13	mANGPTL6	0.108151	-0.000109925
33	14	mANGPTL6	0.108448	-0.000389899
33	15	mANGPTL6	0.108383	-0.00103161
33	16	mANGPTL6	0.108824	-0.00116755
33	17	mANGPTL6	0.109445	-0.00112421
33	18	mANGPTL6	0.110258	-0.000887426
33	19	mANGPTL6	0.110839	-0.000884129
33	20	mANGPTL6	0.112876	0.000576055
33	21	mANGPTL6	0.115948	0.0030719
33	22	mANGPTL6	0.122008	0.00855426
33	23	mANGPTL6	0.133522	0.0194915
33	24	mANGPTL6	0.15499	0.040383
33	25	mANGPTL6	0.195387	0.0802028
33	26	mANGPTL6	0.269349	0.153588
33	27	mANGPTL6	0.396063	0.279725
33	28	mANGPTL6	0.590096	0.473181
33	29	mANGPTL6	0.837175	0.719683
33	30	mANGPTL6	1.09177	0.973703
33	31	mANGPTL6	1.30206	1.18341
33	32	mANGPTL6	1.45001	1.33079
33	33	mANGPTL6	1.5436	1.4238
33	34	mANGPTL6	1.60413	1.48376
33	35	mANGPTL6	1.64067	1.51972
33	36	mANGPTL6	1.66571	1.54418
33	37	mANGPTL6	1.68505	1.56294
33	38	mANGPTL6	1.69989	1.5772
33	39	mANGPTL6	1.71526	1.592
33	40	mANGPTL6	1.72677	1.60294
34	1	mANGPTL6	0.106256	-0.00460408
34	2	mANGPTL6	0.107503	-0.00387813
34	3	mANGPTL6	0.110412	-0.00149159
34	4	mANGPTL6	0.112441	1.52558e-05
34	5	mANGPTL6	0.113352	0.000404674
34	6	mANGPTL6	0.114391	0.000921996
34	7	mANGPTL6	0.114946	0.000954628
34	8	mANGPTL6	0.115017	0.000504038
34	9	mANGPTL6	0.115488	0.000452516
34	10	mANGPTL6	0.115974	0.000417467
34	11	mANGPTL6	0.11643	0.000350843
34	12	mANGPTL6	0.116438	-0.000163063
34	13	mANGPTL6	0.116294	-0.000828826
34	14	mANGPTL6	0.117247	-0.000398049
34	15	mANGPTL6	0.117349	-0.000817265
34	16	mANGPTL6	0.118181	-0.000507576
34	17	mANGPTL6	0.118229	-0.000981322
34	18	mANGPTL6	0.118558	-0.00117391
34	19	mANGPTL6	0.119333	-0.000921713
34	20	mANGPTL6	0.121229	0.00045297
34	21	mANGPTL6	0.124107	0.00280892
34	22	mANGPTL6	0.128709	0.00688949
34	23	mANGPTL6	0.138904	0.0165622
34	24	mANGPTL6	0.157818	0.0349546
34	25	mANGPTL6	0.193409	0.0700234
34	26	mANGPTL6	0.258377	0.134469
34	27	mANGPTL6	0.374041	0.249612
34	28	mANGPTL6	0.557139	0.432187
34	29	mANGPTL6	0.803482	0.678009
34	30	mANGPTL6	1.0793	0.953308
34	31	mANGPTL6	1.3214	1.19488
34	32	mANGPTL6	1.49851	1.37148
34	33	mANGPTL6	1.61064	1.48308
34	34	mANGPTL6	1.67686	1.54877
34	35	mANGPTL6	1.71917	1.59057
34	36	mANGPTL6	1.74896	1.61984
34	37	mANGPTL6	1.77103	1.64139
34	38	mANGPTL6	1.78859	1.65841
34	39	mANGPTL6	1.8028	1.6721
34	40	mANGPTL6	1.80962	1.67841
35	1	mANGPTL6	0.155852	-0.00903235
35	2	mANGPTL6	0.15828	-0.00743037
35	3	mANGPTL6	0.164933	-0.00160442
35	4	mANGPTL6	0.166337	-0.00102653
35	5	mANGPTL6	0.167824	-0.000366124
35	6	mANGPTL6	0.16923	0.000214037
35	7	mANGPTL6	0.17031	0.000467087
35	8	mANGPTL6	0.171428	0.000759671
35	9	mANGPTL6	0.17256	0.00106437
35	10	mANGPTL6	0.173587	0.00126507
35	11	mANGPTL6	0.174165	0.00101716
35	12	mANGPTL6	0.17464	0.000665894
35	13	mANGPTL6	0.175058	0.00025711
35	14	mANGPTL6	0.175717	9.00523e-05
35	15	mANGPTL6	0.176186	-0.000266906
35	16	mANGPTL6	0.17713	-0.000149247
35	17	mANGPTL6	0.177017	-0.00108932
35	18	mANGPTL6	0.177829	-0.00110344
35	19	mANGPTL6	0.178529	-0.00122936
35	20	mANGPTL6	0.180082	-0.000503034
35	21	mANGPTL6	0.182949	0.00153793
35	22	mANGPTL6	0.187867	0.00562957
35	23	mANGPTL6	0.197083	0.0140184
35	24	mANGPTL6	0.21432	0.0304291
35	25	mANGPTL6	0.248135	0.0634184
35	26	mANGPTL6	0.309103	0.123559
35	27	mANGPTL6	0.417457	0.231088
35	28	mANGPTL6	0.591967	0.404771
35	29	mANGPTL6	0.834203	0.646181
35	30	mANGPTL6	1.10978	0.920936
35	31	mANGPTL6	1.35696	1.16728
35	32	mANGPTL6	1.54219	1.35168
35	33	mANGPTL6	1.65983	1.4685
35	34	mANGPTL6	1.7338	1.54164
35	35	mANGPTL6	1.78229	1.58931
35	36	mANGPTL6	1.8155	1.62169
35	37	mANGPTL6	1.83979	1.64515
35	38	mANGPTL6	1.85572	1.66026
35	39	mANGPTL6	1.87181	1.67553
35	40	mANGPTL6	1.88462	1.68751
36	1	mANGPTL6	0.117529	-0.000131134
36	2	mANGPTL6	0.117801	-0.000256572
36	3	mANGPTL6	0.119104	0.000647637
36	4	mANGPTL6	0.119547	0.000692936
36	5	mANGPTL6	0.119204	-4.85757e-05
36	6	mANGPTL6	0.118971	-0.000680035
36	7	mANGPTL6	0.119509	-0.000540188
36	8	mANGPTL6	0.119928	-0.000519051
36	9	mANGPTL6	0.121145	0.00029973
36	10	mANGPTL6	0.122163	0.000919431
36	11	mANGPTL6	0.122241	0.000599197
36	12	mANGPTL6	0.122159	0.000118463
36	13	mANGPTL6	0.122229	-0.000208923
36	14	mANGPTL6	0.122269	-0.000567572
36	15	mANGPTL6	0.122746	-0.000488619
36	16	mANGPTL6	0.123054	-0.000578489
36	17	mANGPTL6	0.122932	-0.00109873
36	18	mANGPTL6	0.123588	-0.000841175
36	19	mANGPTL6	0.124355	-0.000472394
36	20	mANGPTL6	0.12564	0.000413778
36	21	mANGPTL6	0.127977	0.00235258
36	22	mANGPTL6	0.132388	0.00636615
36	23	mANGPTL6	0.142026	0.0156056
36	24	mANGPTL6	0.159869	0.0330505
36	25	mANGPTL6	0.193221	0.0660043
36	26	mANGPTL6	0.254746	0.127131
36	27	mANGPTL6	0.362422	0.234408
36	28	mANGPTL6	0.535225	0.406814
36	29	mANGPTL6	0.772463	0.643653
36	30	mANGPTL6	1.03712	0.90791
36	31	mANGPTL6	1.27047	1.14086
36	32	mANGPTL6	1.44286	1.31286
36	33	mANGPTL6	1.55565	1.42525
36	34	mANGPTL6	1.62659	1.49579
36	35	mANGPTL6	1.67061	1.53941
36	36	mANGPTL6	1.70006	1.56846
36	37	mANGPTL6	1.72348	1.59149
36	38	mANGPTL6	1.74168	1.60929
36	39	mANGPTL6	1.75391	1.62112
36	40	mANGPTL6	1.76011	1.62692
37	1	mANGPTL6	0.361672	-0.00559538
37	2	mANGPTL6	0.36525	-0.00312823
37	3	mANGPTL6	0.367933	-0.00155481
37	4	mANGPTL6	0.369598	-0.00100013
37	5	mANGPTL6	0.371985	0.000277133
37	6	mANGPTL6	0.375045	0.00222784
37	7	mANGPTL6	0.376444	0.00251689
37	8	mANGPTL6	0.376375	0.00133702
37	9	mANGPTL6	0.376759	0.000611897
37	10	mANGPTL6	0.378096	0.000838632
37	11	mANGPTL6	0.378292	-7.58535e-05
37	12	mANGPTL6	0.378193	-0.00128473
37	13	mANGPTL6	0.378397	-0.00219018
37	14	mANGPTL6	0.380319	-0.00137783
37	15	mANGPTL6	0.381521	-0.0012864
37	16	mANGPTL6	0.382993	-0.000924242
37	17	mANGPTL6	0.383417	-0.00161038
37	18	mANGPTL6	0.384783	-0.00135438
37	19	mANGPTL6	0.386732	-0.000515567
37	20	mANGPTL6	0.389671	0.00131444
37	21	mANGPTL6	0.393518	0.00405065
37	22	mANGPTL6	0.401309	0.0107318
37	23	mANGPTL6	0.416919	0.0252318
37	24	mANGPTL6	0.446165	0.0533681
37	25	mANGPTL6	0.500637	0.10673
37	26	mANGPTL6	0.597091	0.202074
37	27	mANGPTL6	0.75456	0.358433
37	28	mANGPTL6	0.974736	0.577499
37	29	mANGPTL6	1.23731	0.838964
37	30	mANGPTL6	1.4872	1.08775
37	31	mANGPTL6	1.67828	1.27771
37	32	mANGPTL6	1.80779	1.40611
37	33	mANGPTL6	1.88975	1.48696
37	34	mANGPTL6	1.94166	1.53776
37	35	mANGPTL6	1.9768	1.5718
37	36	mANGPTL6	2.00245	1.59634
37	37	mANGPTL6	2.02019	1.61297
37	38	mANGPTL6	2.0342	1.62586
37	39	mANGPTL6	2.04599	1.63654
37	40	mANGPTL6	2.04969	1.63913
38	1	mANGPTL6	0.0939135	-0.00439038
38	2	mANGPTL6	0.0954947	-0.00340879
38	3	mANGPTL6	0.0983912	-0.00111182
38	4	mANGPTL6	0.0999807	-0.000121919
38	5	mANGPTL6	0.101234	0.00053204
38	6	mANGPTL6	0.102439	0.00113691
38	7	mANGPTL6	0.103123	0.001222
38	8	mANGPTL6	0.103369	0.000867641
38	9	mANGPTL6	0.103563	0.000462798
38	10	mANGPTL6	0.104063	0.000362349
38	11	mANGPTL6	0.104266	-3.40973e-05
38	12	mANGPTL6	0.10439	-0.000509222
38	13	mANGPTL6	0.105099	-0.000399706
38	14	mANGPTL6	0.10503	-0.00106881
38	15	mANGPTL6	0.105194	-0.0015043
38	16	mANGPTL6	0.10591	-0.00138774
38	17	mANGPTL6	0.106628	-0.00126886
38	18	mANGPTL6	0.1072	-0.00129676
38	19	mANGPTL6	0.108153	-0.000943403
38	20	mANGPTL6	0.110709	0.00101284
38	21	mANGPTL6	0.114346	0.00405008
38	22	mANGPTL6	0.121265	0.0103698
38	23	mANGPTL6	0.13591	0.0244156
38	24	mANGPTL6	0.163552	0.0514575
38	25	mANGPTL6	0.214729	0.102035
38	26	mANGPTL6	0.307109	0.193815
38	27	mANGPTL6	0.460506	0.346613
38	28	mANGPTL6	0.681448	0.566955
38	29	mANGPTL6	0.945214	0.830121
38	30	mANGPTL6	1.20416	1.08846
38	31	mANGPTL6	1.40658	1.29029
38	32	mANGPTL6	1.54562	1.42873
38	33	mANGPTL6	1.6309	1.51341
38	34	mANGPTL6	1.6846	1.56651
38	35	mANGPTL6	1.72118	1.60249
38	36	mANGPTL6	1.74992	1.63063
38	37	mANGPTL6	1.76896	1.64907
38	38	mANGPTL6	1.78002	1.65953
38	39	mANGPTL6	1.7905	1.66942
38	40	mANGPTL6	1.79817	1.67648
39	1	mANGPTL6	0.158247	-0.0141168
39	2	mANGPTL6	0.162509	-0.0107111
39	3	mANGPTL6	0.169201	-0.00487594
39	4	mANGPTL6	0.173621	-0.00131241
39	5	mANGPTL6	0.176259	0.000469392
39	6	mANGPTL6	0.177689	0.0010423
39	7	mANGPTL6	0.179077	0.00157398
39	8	mANGPTL6	0.180343	0.00198398
39	9	mANGPTL6	0.181237	0.00202181
39	10	mANGPTL6	0.181682	0.00160944
39	11	mANGPTL6	0.181799	0.000870558
39	12	mANGPTL6	0.182098	0.000313261
39	13	mANGPTL6	0.18291	0.000268491
39	14	mANGPTL6	0.183717	0.000219383
39	15	mANGPTL6	0.18409	-0.000264361
39	16	mANGPTL6	0.184145	-0.0010654
39	17	mANGPTL6	0.184656	-0.00141083
39	18	mANGPTL6	0.185331	-0.00159238
39	19	mANGPTL6	0.186896	-0.000883759
39	20	mANGPTL6	0.189669	0.00103246
39	21	mANGPTL6	0.193835	0.00434194
39	22	mANGPTL6	0.202387	0.0120375
39	23	mANGPTL6	0.218449	0.027243
39	24	mANGPTL6	0.248484	0.0564211
39	25	mANGPTL6	0.304996	0.112077
39	26	mANGPTL6	0.404581	0.210806
39	27	mANGPTL6	0.567182	0.37255
39	28	mANGPTL6	0.800184	0.604696
39	29	mANGPTL6	1.07307	0.876726
39	30	mANGPTL6	1.32862	1.13141
39	31	mANGPTL6	1.52614	1.32809
39	32	mANGPTL6	1.65994	1.46103
39	33	mANGPTL6	1.74264	1.54287
39	34	mANGPTL6	1.79715	1.59652
39	35	mANGPTL6	1.83267	1.63119
39	36	mANGPTL6	1.85841	1.65607
39	37	mANGPTL6	1.87857	1.67537
39	38	mANGPTL6	1.8943	1.69025
39	39	mANGPTL6	1.9064	1.70149
39	40	mANGPTL6	1.91785	1.71208
40	1	mANGPTL6	0.129898	-0.00723771
40	2	mANGPTL6	0.132597	-0.00519306
40	3	mANGPTL6	0.136034	-0.00240924
40	4	mANGPTL6	0.13804	-0.00105696
40	5	mANGPTL6	0.139445	-0.000305281
40	6	mANGPTL6	0.140784	0.000379728
40	7	mANGPTL6	0.142373	0.00131536
40	8	mANGPTL6	0.14358	0.00186875
40	9	mANGPTL6	0.143963	0.00159837
40	10	mANGPTL6	0.144067	0.00104868
40	11	mANGPTL6	0.144544	0.000872074
40	12	mANGPTL6	0.144425	9.97943e-05
40	13	mANGPTL6	0.144781	-0.00019842
40	14	mANGPTL6	0.14537	-0.000262448
40	15	mANGPTL6	0.145345	-0.00094094
40	16	mANGPTL6	0.145784	-0.00115565
40	17	mANGPTL6	0.146109	-0.00148444
40	18	mANGPTL6	0.147184	-0.00106272
40	19	mANGPTL6	0.148661	-0.000239399
40	20	mANGPTL6	0.151487	0.00193275
40	21	mANGPTL6	0.156618	0.00640983
40	22	mANGPTL6	0.167454	0.0165928
40	23	mANGPTL6	0.187286	0.0357712
40	24	mANGPTL6	0.223638	0.0714689
40	25	mANGPTL6	0.291452	0.13863
40	26	mANGPTL6	0.409124	0.255648
40	27	mANGPTL6	0.594447	0.440318
40	28	mANGPTL6	0.84187	0.687086
40	29	mANGPTL6	1.10791	0.95247
40	30	mANGPTL6	1.3411	1.18501
40	31	mANGPTL6	1.50921	1.35247
40	32	mANGPTL6	1.61386	1.45646
40	33	mANGPTL6	1.68092	1.52287
40	34	mANGPTL6	1.72487	1.56616
40	35	mANGPTL6	1.75525	1.59589
40	36	mANGPTL6	1.77608	1.61606
40	37	mANGPTL6	1.7918	1.63113
40	38	mANGPTL6	1.80597	1.64465
40	39	mANGPTL6	1.81434	1.65236
40	40	mANGPTL6	1.82505	1.66243
41	1	mANGPTL6	0.213034	-0.0074354
41	2	mANGPTL6	0.214154	-0.00725157
41	3	mANGPTL6	0.217957	-0.00438456
41	4	mANGPTL6	0.222236	-0.00104256
41	5	mANGPTL6	0.224018	-0.00019732
41	6	mANGPTL6	0.226094	0.000942564
41	7	mANGPTL6	0.227767	0.00167867
41	8	mANGPTL6	0.229004	0.0019799
41	9	mANGPTL6	0.230119	0.00215826
41	10	mANGPTL6	0.230274	0.00137677
41	11	mANGPTL6	0.230823	0.000989035
41	12	mANGPTL6	0.231297	0.000526478
41	13	mANGPTL6	0.232039	0.000332693
41	14	mANGPTL6	0.232312	-0.000331343
41	15	mANGPTL6	0.233119	-0.000460397
41	16	mANGPTL6	0.233394	-0.00112242
41	17	mANGPTL6	0.233904	-0.00154822
41	18	mANGPTL6	0.234678	-0.00171069
41	19	mANGPTL6	0.236622	-0.000703981
41	20	mANGPTL6	0.239779	0.00151712
41	21	mANGPTL6	0.244896	0.0056977
41	22	mANGPTL6	0.253825	0.0136901
41	23	mANGPTL6	0.272272	0.0312004
41	24	mANGPTL6	0.30822	0.066212
41	25	mANGPTL6	0.373883	0.130939
41	26	mANGPTL6	0.488345	0.244464
41	27	mANGPTL6	0.669781	0.424963
41	28	mANGPTL6	0.917206	0.671452
41	29	mANGPTL6	1.1918	0.945109
41	30	mANGPTL6	1.43612	1.18849
41	31	mANGPTL6	1.61783	1.36927
41	32	mANGPTL6	1.73678	1.48729
41	33	mANGPTL6	1.81239	1.56196
41	34	mANGPTL6	1.85858	1.60721
41	35	mANGPTL6	1.89012	1.63781
41	36	mANGPTL6	1.91411	1.66086
41	37	mANGPTL6	1.93406	1.67988
41	38	mANGPTL6	1.94836	1.69324
41	39	mANGPTL6	1.96276	1.70671
41	40	mANGPTL6	1.97114	1.71415
42	1	mANGPTL6	0.0961568	-0.00644913
42	2	mANGPTL6	0.0982009	-0.0050643
42	3	mANGPTL6	0.101339	-0.00258576
42	4	mANGPTL6	0.10324	-0.00134362
42	5	mANGPTL6	0.104929	-0.000313703
42	6	mANGPTL6	0.106461	0.000558622
42	7	mANGPTL6	0.108541	0.0019796
42	8	mANGPTL6	0.108723	0.00150291
42	9	mANGPTL6	0.1092	0.00132058
42	10	mANGPTL6	0.109751	0.00121236
42	11	mANGPTL6	0.110162	0.00096392
42	12	mANGPTL6	0.110307	0.00044929
42	13	mANGPTL6	0.110295	-0.000221959
42	14	mANGPTL6	0.110599	-0.000576559
42	15	mANGPTL6	0.11082	-0.00101529
42	16	mANGPTL6	0.111517	-0.000977632
42	17	mANGPTL6	0.111821	-0.00133269
42	18	mANGPTL6	0.112829	-0.000983265
42	19	mANGPTL6	0.114088	-0.000383974
42	20	mANGPTL6	0.116878	0.00174717
42	21	mANGPTL6	0.122081	0.0062904
42	22	mANGPTL6	0.132262	0.0158125
42	23	mANGPTL6	0.150897	0.0337879
42	24	mANGPTL6	0.186545	0.0687773
42	25	mANGPTL6	0.253153	0.134726
42	26	mANGPTL6	0.369238	0.250152
42	27	mANGPTL6	0.551776	0.432031
42	28	mANGPTL6	0.798541	0.678136
42	29	mANGPTL6	1.06781	0.946747
42	30	mANGPTL6	1.30601	1.18429
42	31	mANGPTL6	1.47986	1.35748
42	32	mANGPTL6	1.59689	1.47385
42	33	mANGPTL6	1.66813	1.54443
42	34	mANGPTL6	1.71228	1.58792
42	35	mANGPTL6	1.74426	1.61924
42	36	mANGPTL6	1.76398	1.6383
42	37	mANGPTL6	1.78171	1.65537
42	38	mANGPTL6	1.7968	1.6698
42	39	mANGPTL6	1.80588	1.67822
42	40	mANGPTL6	1.81242	1.6841
43	1	mANGPTL6	0.169781	-0.0147111
43	2	mANGPTL6	0.174212	-0.0113707
43	3	mANGPTL6	0.180622	-0.00605178
43	4	mANGPTL6	0.185583	-0.00218089
43	5	mANGPTL6	0.189679	0.000824045
43	6	mANGPTL6	0.191704	0.00175838
43	7	mANGPTL6	0.19314	0.00210453
43	8	mANGPTL6	0.194369	0.00224291
43	9	mANGPTL6	0.195526	0.00230893
43	10	mANGPTL6	0.196414	0.00210668
43	11	mANGPTL6	0.196666	0.00126814
43	12	mANGPTL6	0.197668	0.00117905
43	13	mANGPTL6	0.197665	8.63524e-05
43	14	mANGPTL6	0.197975	-0.000694179
43	15	mANGPTL6	0.199007	-0.00075336
43	16	mANGPTL6	0.199789	-0.00106179
43	17	mANGPTL6	0.200308	-0.00163314
43	18	mANGPTL6	0.201247	-0.00178495
43	19	mANGPTL6	0.203378	-0.000744023
43	20	mANGPTL6	0.206238	0.00102511
43	21	mANGPTL6	0.211077	0.00477389
43	22	mANGPTL6	0.221234	0.0138399
43	23	mANGPTL6	0.240521	0.0320365
43	24	mANGPTL6	0.276694	0.0671187
43	25	mANGPTL6	0.343051	0.132385
43	26	mANGPTL6	0.460063	0.248307
43	27	mANGPTL6	0.645693	0.432847
43	28	mANGPTL6	0.899624	0.685687
43	29	mANGPTL6	1.18184	0.966811
43	30	mANGPTL6	1.43517	1.21905
43	31	mANGPTL6	1.62216	1.40496
43	32	mANGPTL6	1.74499	1.52669
43	33	mANGPTL6	1.82244	1.60305
43	34	mANGPTL6	1.87126	1.65078
43	35	mANGPTL6	1.90337	1.6818
43	36	mANGPTL6	1.92737	1.70471
43	37	mANGPTL6	1.94756	1.7238
43	38	mANGPTL6	1.96405	1.73921
43	39	mANGPTL6	1.97434	1.7484
43	40	mANGPTL6	1.98311	1.75608
44	1	mANGPTL6	0.144703	-0.0025123
44	2	mANGPTL6	0.145802	-0.00202555
44	3	mANGPTL6	0.147633	-0.000805679
44	4	mANGPTL6	0.148806	-0.000245378
44	5	mANGPTL6	0.149761	9.8379e-05
44	6	mANGPTL6	0.150565	0.000289831
44	7	mANGPTL6	0.151467	0.000580406
44	8	mANGPTL6	0.152108	0.000609168
44	9	mANGPTL6	0.15276	0.000649225
44	10	mANGPTL6	0.153	0.000277875
44	11	mANGPTL6	0.153855	0.000520036
44	12	mANGPTL6	0.154218	0.00027174
44	13	mANGPTL6	0.154192	-0.000365893
44	14	mANGPTL6	0.154369	-0.00080172
44	15	mANGPTL6	0.154879	-0.000903507
44	16	mANGPTL6	0.15528	-0.00111394
44	17	mANGPTL6	0.156174	-0.000831903
44	18	mANGPTL6	0.157197	-0.000420971
44	19	mANGPTL6	0.158372	0.000142012
44	20	mANGPTL6	0.160892	0.00205032
44	21	mANGPTL6	0.166183	0.00672961
44	22	mANGPTL6	0.176434	0.0163687
44	23	mANGPTL6	0.195039	0.0343611
44	24	mANGPTL6	0.231754	0.0704645
44	25	mANGPTL6	0.299031	0.13713
44	26	mANGPTL6	0.416724	0.254211
44	27	mANGPTL6	0.606964	0.443839
44	28	mANGPTL6	0.868386	0.704649
44	29	mANGPTL6	1.15937	0.995022
44	30	mANGPTL6	1.42144	1.25648
44	31	mANGPTL6	1.61641	1.45084
44	32	mANGPTL6	1.7462	1.58001
44	33	mANGPTL6	1.83002	1.66322
44	34	mANGPTL6	1.88205	1.71465
44	35	mANGPTL6	1.91671	1.74869
44	36	mANGPTL6	1.94425	1.77562
44	37	mANGPTL6	1.96822	1.79898
44	38	mANGPTL6	1.98453	1.81467
44	39	mANGPTL6	1.9991	1.82864
44	40	mANGPTL6	2.00804	1.83696
45	1	mANGPTL6	0.109996	-0.00692383
45	2	mANGPTL6	0.111662	-0.00595636
45	3	mANGPTL6	0.115103	-0.00321345
45	4	mANGPTL6	0.117933	-0.00108255
45	5	mANGPTL6	0.119371	-0.000342818
45	6	mANGPTL6	0.121042	0.000630362
45	7	mANGPTL6	0.12273	0.00161979
45	8	mANGPTL6	0.123363	0.00155412
45	9	mANGPTL6	0.124284	0.00177675
45	10	mANGPTL6	0.124686	0.0014807
45	11	mANGPTL6	0.124428	0.000524201
45	12	mANGPTL6	0.124936	0.000333825
45	13	mANGPTL6	0.125528	0.000227006
45	14	mANGPTL6	0.125992	-7.03823e-06
45	15	mANGPTL6	0.126081	-0.0006161
45	16	mANGPTL6	0.126342	-0.00105349
45	17	mANGPTL6	0.126747	-0.00134687
45	18	mANGPTL6	0.127345	-0.00144707
45	19	mANGPTL6	0.128993	-0.00049744
45	20	mANGPTL6	0.131649	0.00146006
45	21	mANGPTL6	0.13666	0.00577251
45	22	mANGPTL6	0.146375	0.0147894
45	23	mANGPTL6	0.164246	0.0319622
45	24	mANGPTL6	0.198997	0.0660141
45	25	mANGPTL6	0.263341	0.12966
45	26	mANGPTL6	0.377487	0.243108
45	27	mANGPTL6	0.561195	0.426117
45	28	mANGPTL6	0.817101	0.681325
45	29	mANGPTL6	1.1056	0.96913
45	30	mANGPTL6	1.36934	1.23217
45	31	mANGPTL6	1.56825	1.43038
45	32	mANGPTL6	1.7012	1.56263
45	33	mANGPTL6	1.78315	1.64389
45	34	mANGPTL6	1.83537	1.69541
45	35	mANGPTL6	1.8721	1.73144
45	36	mANGPTL6	1.89895	1.75759
45	37	mANGPTL6	1.91912	1.77706
45	38	mANGPTL6	1.93086	1.7881
45	39	mANGPTL6	1.94125	1.79779
45	40	mANGPTL6	1.95062	1.80647
46	1
46	2
46	3
46	4
46	5
46	6
46	7
46	8
46	9
46	10
46	11
46	12
46	13
46	14
46	15
46	16
46	17
46	18
46	19
46	20
46	21
46	22
46	23
46	24
46	25
46	26
46	27
46	28
46	29
46	30
46	31
46	32
46	33
46	34
46	35
46	36
46	37
46	38
46	39
46	40
47	1
47	2
47	3
47	4
47	5
47	6
47	7
47	8
47	9
47	10
47	11
47	12
47	13
47	14
47	15
47	16
47	17
47	18
47	19
47	20
47	21
47	22
47	23
47	24
47	25
47	26
47	27
47	28
47	29
47	30
47	31
47	32
47	33
47	34
47	35
47	36
47	37
47	38
47	39
47	40
48	1
48	2
48	3
48	4
48	5
48	6
48	7
48	8
48	9
48	10
48	11
48	12
48	13
48	14
48	15
48	16
48	17
48	18
48	19
48	20
48	21
48	22
48	23
48	24
48	25
48	26
48	27
48	28
48	29
48	30
48	31
48	32
48	33
48	34
48	35
48	36
48	37
48	38
48	39
48	40
49	1
49	2
49	3
49	4
49	5
49	6
49	7
49	8
49	9
49	10
49	11
49	12
49	13
49	14
49	15
49	16
49	17
49	18
49	19
49	20
49	21
49	22
49	23
49	24
49	25
49	26
49	27
49	28
49	29
49	30
49	31
49	32
49	33
49	34
49	35
49	36
49	37
49	38
49	39
49	40
50	1
50	2
50	3
50	4
50	5
[truncated: 13,395 more rows]

## Sheet: Results
Block Type	384-Well Block
Calibration Background is expired	Yes
Calibration Background performed on	10-12-2018 11:47:46 PDT
Calibration FAM is expired	Yes
Calibration FAM performed on	10-23-2018 10:23:19 PDT
Calibration MELTDOCTOR is expired	Yes
Calibration MELTDOCTOR performed on	09-26-2017 21:22:46 PDT
Calibration NED is expired	Yes
Calibration NED performed on	10-23-2018 10:33:14 PDT
Calibration ROI is expired	Yes
Calibration ROI performed on	10-12-2018 09:37:21 PDT
Calibration ROX is expired	Yes
Calibration ROX performed on	10-23-2018 10:07:21 PDT
Calibration SYBR is expired	Yes
Calibration SYBR performed on	10-23-2018 09:57:53 PDT
Calibration TAMRA is expired	Yes
Calibration TAMRA performed on	10-23-2018 10:45:25 PDT
Calibration Uniformity is expired	Yes
Calibration Uniformity performed on	10-12-2018 10:06:59 PDT
Calibration VIC is expired	Yes
Calibration VIC performed on	10-23-2018 10:54:25 PDT
Chemistry	SYBR_GREEN
Date Created	09-12-2021 23:22:23 PDT
Experiment File Name	D:\NZZ\2021-09-12 215735.eds
Experiment Name	2021-09-12 215735
Experiment Run End Time	09-12-2021 16:37:35 PDT
Experiment Type	Comparative Cт (ΔΔCт)
Instrument Name	285880860
Instrument Serial Number	285880860
Instrument Type	QuantStudio 12K Flex
Passive Reference	ROX
Quantification Cycle Method	Ct
Signal Smoothing On	true
Stage/ Cycle where Analysis is performed	Stage 2, Step 2
Well	Well Position	Omit	Sample Name	Target Name	Task	Reporter	Quencher	RQ	RQ Min	RQ Max	CT	Ct Mean	Ct SE	Quantity	Delta Ct Mean	Delta Ct SE	Delta Delta Ct	Automatic Ct Threshold	Ct Threshold	Automatic Baseline	Baseline Start	Baseline End	Efficiency	Comments	Amp Score	Cq Conf	Tm1	Tm2	Tm3	MTP	EXPFAIL	HIGHSD	NOAMP	THOLDFAIL
13	A13	false	Vec-PMH-L	mARG1	UNKNOWN	SYBR	None	0.00715891	0.00409217	0.0125239	29.746	30.2289	0.258937		13.1812	0.290614	7.12605	true	0.134648	true	3	25			1.29668	0.978399	84.1756			N	N	N	N	N
14	A14	false	Vec-PMH-L	mARG1	UNKNOWN	SYBR	None	0.00715891	0.00409217	0.0125239	30.633	30.2289	0.258937		13.1812	0.290614	7.12605	true	0.134648	true	3	26			1.28994	0.982994	84.1756			N	N	N	N	N
15	A15	false	Vec-PMH-L	mARG1	UNKNOWN	SYBR	None	0.00715891	0.00409217	0.0125239	30.308	30.2289	0.258937		13.1812	0.290614	7.12605	true	0.134648	true	3	25			1.29123	0.979201	84.1756			N	N	N	N	N
16	A16	false	HBx-PMH-L-L	mARG1	UNKNOWN	SYBR	None	0.00596235	0.0040209	0.00884119	30.286	30.0637	0.2038		13.445	0.204708	7.3899	true	0.134648	true	3	25			1.2976	0.97498	84.1756			N	N	N	N	N
17	A17	false	HBx-PMH-L-L	mARG1	UNKNOWN	SYBR	None	0.00596235	0.0040209	0.00884119	30.248	30.0637	0.2038		13.445	0.204708	7.3899	true	0.134648	true	3	25			1.29951	0.9661	84.1756			N	N	N	N	N
18	A18	false	HBx-PMH-L-L	mARG1	UNKNOWN	SYBR	None	0.00596235	0.0040209	0.00884119	29.657	30.0637	0.2038		13.445	0.204708	7.3899	true	0.134648	true	3	25			1.31375	0.964047	84.1756			N	N	N	N	N
37	B13	false	Vec-PMH-L	mANGPTL6	UNKNOWN	SYBR	None	2.0339	1.5603	2.65126	25.787	25.7894	0.0395534		8.74165	0.13774	-1.02425	true	0.179058	true	3	21			1.33226	0.961136	88.5434			N	N	N	N	N
38	B14	false	Vec-PMH-L	mANGPTL6	UNKNOWN	SYBR	None	2.0339	1.5603	2.65126	25.859	25.7894	0.0395534		8.74165	0.13774	-1.02425	true	0.179058	true	3	21			1.33745	0.975855	88.4149			N	N	N	N	N
39	B15	false	Vec-PMH-L	mANGPTL6	UNKNOWN	SYBR	None	2.0339	1.5603	2.65126	25.722	25.7894	0.0395534		8.74165	0.13774	-1.02425	true	0.179058	true	3	20			1.34039	0.953864	88.4149			N	N	N	N	N
40	B16	false	HBx-PMH-L-L	mANGPTL6	UNKNOWN	SYBR	None	1.94504	1.82997	2.06734	25.381	25.4247	0.0251671		8.8061	0.031687	-0.959797	true	0.179058	true	3	20			1.33014	0.966841	88.4149			N	N	N	N	N
41	B17	false	HBx-PMH-L-L	mANGPTL6	UNKNOWN	SYBR	None	1.94504	1.82997	2.06734	25.468	25.4247	0.0251671		8.8061	0.031687	-0.959797	true	0.179058	true	3	20			1.3379	0.962956	88.4149			N	N	N	N	N
42	B18	false	HBx-PMH-L-L	mANGPTL6	UNKNOWN	SYBR	None	1.94504	1.82997	2.06734	25.425	25.4247	0.0251671		8.8061	0.031687	-0.959797	true	0.179058	true	3	20			1.33328	0.968626	88.4149			N	N	N	N	N
61	C13	false	Vec-PMH-L	mRGS5	UNKNOWN	SYBR	None	1.37469	0.754964	2.50312	31.589	31.7278	0.282083		14.6801	0.311414	-0.459104	true	0.147132	true	3	27			1.3186	0.96664	86.2311			N	N	N	N	N
62	C14	false	Vec-PMH-L	mRGS5	UNKNOWN	SYBR	None	1.37469	0.754964	2.50312	32.271	31.7278	0.282083		14.6801	0.311414	-0.459104	true	0.147132	true	3	27			1.31865	0.976956	86.2311			N	N	N	N	N
63	C15	false	Vec-PMH-L	mRGS5	UNKNOWN	SYBR	None	1.37469	0.754964	2.50312	31.324	31.7278	0.282083		14.6801	0.311414	-0.459104	true	0.147132	true	3	26			1.32516	0.977647	86.2311			N	N	N	N	N
64	C16	false	HBx-PMH-L-L	mRGS5	UNKNOWN	SYBR	None	1.09564	0.740077	1.62203	31.883	31.6261	0.202956		15.0074	0.203867	-0.131772	true	0.147132	true	3	27			1.34502	0.947896	86.2311			N	N	N	N	N
65	C17	false	HBx-PMH-L-L	mRGS5	UNKNOWN	SYBR	None	1.09564	0.740077	1.62203	31.226	31.6261	0.202956		15.0074	0.203867	-0.131772	true	0.147132	true	3	26			1.34259	0.958535	86.2311			N	N	N	N	N
66	C18	false	HBx-PMH-L-L	mRGS5	UNKNOWN	SYBR	None	1.09564	0.740077	1.62203	31.769	31.6261	0.202956		15.0074	0.203867	-0.131772	true	0.147132	true	3	27			1.30859	0.964563	86.1026			N	N	N	N	N
85	D13	false	Vec-PMH-L	mPALM2	UNKNOWN	SYBR	None	7.75855	5.13513	11.7222	30.293	30.3244	0.169049		13.2767	0.214442	-2.95579	true	0.0987266	true	3	26			1.34046	0.966166	82.2487			N	N	N	N	N
86	D14	false	Vec-PMH-L	mPALM2	UNKNOWN	SYBR	None	7.75855	5.13513	11.7222	30.049	30.3244	0.169049		13.2767	0.214442	-2.95579	true	0.0987266	true	3	26			1.33823	0.966968	82.2487			N	N	N	N	N
87	D15	false	Vec-PMH-L	mPALM2	UNKNOWN	SYBR	None	7.75855	5.13513	11.7222	30.632	30.3244	0.169049		13.2767	0.214442	-2.95579	true	0.0987266	true	3	26			1.33954	0.969535	82.2487			N	N	N	N	N
88	D16	false	HBx-PMH-L-L	mPALM2	UNKNOWN	SYBR	None	4.44196	2.14563	9.19593	30.051	30.6999	0.377618		14.0813	0.378109	-2.1512	true	0.0987266	true	3	26			1.34433	0.972048	82.2487			N	N	Y	N	N
89	D17	false	HBx-PMH-L-L	mPALM2	UNKNOWN	SYBR	None	4.44196	2.14563	9.19593	30.691	30.6999	0.377618		14.0813	0.378109	-2.1512	true	0.0987266	true	3	26			1.34279	0.979008	82.2487			N	N	Y	N	N
90	D18	false	HBx-PMH-L-L	mPALM2	UNKNOWN	SYBR	None	4.44196	2.14563	9.19593	31.359	30.6999	0.377618		14.0813	0.378109	-2.1512	true	0.0987266	true	3	27			1.33636	0.964741	82.1202			N	N	Y	N	N
109	E13	false	Vec-PMH-L	mCyclophilion	UNKNOWN	SYBR	None				16.905	17.0478	0.131939					true	0.158099	true	3	12			1.32268	0.98	85.4603			N	N	N	N	N
110	E14	false	Vec-PMH-L	mCyclophilion	UNKNOWN	SYBR	None				17.311	17.0478	0.131939					true	0.158099	true	3	12			1.33224	0.964011	85.4603			N	N	N	N	N
111	E15	false	Vec-PMH-L	mCyclophilion	UNKNOWN	SYBR	None				16.927	17.0478	0.131939					true	0.158099	true	3	12			1.32335	0.977456	85.4603			N	N	N	N	N
112	E16	false	HBx-PMH-L-L	mCyclophilion	UNKNOWN	SYBR	None				16.581	16.6186	0.0192532					true	0.158099	true	3	11			1.33907	0.978487	85.3318			N	N	N	N	N
113	E17	false	HBx-PMH-L-L	mCyclophilion	UNKNOWN	SYBR	None				16.645	16.6186	0.0192532					true	0.158099	true	3	11			1.32731	0.979846	85.3318			N	N	N	N	N
114	E18	false	HBx-PMH-L-L	mCyclophilion	UNKNOWN	SYBR	None				16.63	16.6186	0.0192532					true	0.158099	true	3	11			1.32509	0.973079	85.3318			N	N	N	N	N
133	F13	false	Vec-PMH-L	mGNAL	UNKNOWN	SYBR	None	0.78619	0.492617	1.25472	29.224	29.2455	0.203948		12.1978	0.242905	0.34705	true	0.163266	true	3	24			1.33342	0.964254	83.0195			N	N	N	N	N
134	F14	false	Vec-PMH-L	mGNAL	UNKNOWN	SYBR	None	0.78619	0.492617	1.25472	28.903	29.2455	0.203948		12.1978	0.242905	0.34705	true	0.163266	true	3	24			1.34233	0.974525	83.0195			N	N	N	N	N
135	F15	false	Vec-PMH-L	mGNAL	UNKNOWN	SYBR	None	0.78619	0.492617	1.25472	29.609	29.2455	0.203948		12.1978	0.242905	0.34705	true	0.163266	true	3	24			1.35074	0.963155	83.0195			N	N	N	N	N
136	F16	false	HBx-PMH-L-L	mGNAL	UNKNOWN	SYBR	None	0.465411	0.352805	0.613957	29.661	29.5728	0.142643		12.9541	0.143937	1.10342	true	0.163266	true	3	25			1.33731	0.946885	83.0195			N	N	N	N	N
137	F17	false	HBx-PMH-L-L	mGNAL	UNKNOWN	SYBR	None	0.465411	0.352805	0.613957	29.294	29.5728	0.142643		12.9541	0.143937	1.10342	true	0.163266	true	3	24			1.32527	0.834143	83.0195			N	N	N	N	N
138	F18	false	HBx-PMH-L-L	mGNAL	UNKNOWN	SYBR	None	0.465411	0.352805	0.613957	29.764	29.5728	0.142643		12.9541	0.143937	1.10342	true	0.163266	true	3	25			1.34271	0.968164	82.891			N	N	N	N	N
157	G13	false	Vec-PMH-L	mTAT	UNKNOWN	SYBR	None	0.079231	0.0584736	0.107357	28.568	28.453	0.0866651		11.4052	0.157857	3.65779	true	0.155283	true	3	23			1.31141	0.954341	85.7172			N	N	N	N	N
158	G14	false	Vec-PMH-L	mTAT	UNKNOWN	SYBR	None	0.079231	0.0584736	0.107357	28.283	28.453	0.0866651		11.4052	0.157857	3.65779	true	0.155283	true	3	23			1.31061	0.951328	85.7172			N	N	N	N	N
159	G15	false	Vec-PMH-L	mTAT	UNKNOWN	SYBR	None	0.079231	0.0584736	0.107357	28.508	28.453	0.0866651		11.4052	0.157857	3.65779	true	0.155283	true	3	23			1.31148	0.958654	85.7172			N	N	N	N	N
160	G16	false	HBx-PMH-L-L	mTAT	UNKNOWN	SYBR	None	0.0860215	0.0788501	0.0938452	27.987	27.9052	0.0409301		11.2866	0.0452323	3.53916	true	0.155283	true	3	23			1.31689	0.9744	85.7172			N	N	N	N	N
161	G17	false	HBx-PMH-L-L	mTAT	UNKNOWN	SYBR	None	0.0860215	0.0788501	0.0938452	27.872	27.9052	0.0409301		11.2866	0.0452323	3.53916	true	0.155283	true	3	23			1.31297	0.967778	85.7172			N	N	N	N	N
162	G18	false	HBx-PMH-L-L	mTAT	UNKNOWN	SYBR	None	0.0860215	0.0788501	0.0938452	27.857	27.9052	0.0409301		11.2866	0.0452323	3.53916	true	0.155283	true	3	23			1.31362	0.966876	85.7172			N	N	N	N	N
181	H13	false	Vec-PMH-L	mALDOB	UNKNOWN	SYBR	None	0.0312728	0.0233575	0.0418705	20.994	20.9067	0.0747474		3.8589	0.151641	4.99895	true	0.164833	true	3	16			1.35412	0.948141	83.9187			N	N	N	N	N
182	H14	false	Vec-PMH-L	mALDOB	UNKNOWN	SYBR	None	0.0312728	0.0233575	0.0418705	20.969	20.9067	0.0747474		3.8589	0.151641	4.99895	true	0.164833	true	3	16			1.3466	0.952576	83.9187			N	N	N	N	N
183	H15	false	Vec-PMH-L	mALDOB	UNKNOWN	SYBR	None	0.0312728	0.0233575	0.0418705	20.758	20.9067	0.0747474		3.8589	0.151641	4.99895	true	0.164833	true	3	16			1.38887	0.954048	83.9187			N	N	N	N	N
184	H16	false	HBx-PMH-L-L	mALDOB	UNKNOWN	SYBR	None	0.0226918	0.0216877	0.0237423	20.933	20.9403	0.0135025		4.32164	0.023516	5.46169	true	0.164833	true	3	16			1.34127	0.969771	83.9187			N	N	N	N	N
185	H17	false	HBx-PMH-L-L	mALDOB	UNKNOWN	SYBR	None	0.0226918	0.0216877	0.0237423	20.921	20.9403	0.0135025		4.32164	0.023516	5.46169	true	0.164833	true	3	16			1.33236	0.979771	83.9187			N	N	N	N	N
186	H18	false	HBx-PMH-L-L	mALDOB	UNKNOWN	SYBR	None	0.0226918	0.0216877	0.0237423	20.966	20.9403	0.0135025		4.32164	0.023516	5.46169	true	0.164833	true	3	16			1.33259	0.94379	83.9187			N	N	N	N	N
205	I13	false	Vec-PMH-L	mMAGEA6	UNKNOWN	SYBR	None				Undetermined							true	0.04	true	3	39			0	0	61.3091			N	Y	N	Y	Y
206	I14	false	Vec-PMH-L	mMAGEA6	UNKNOWN	SYBR	None				Undetermined							true	0.04	true	3	39			0	0	61.3091			N	Y	N	Y	Y
207	I15	false	Vec-PMH-L	mMAGEA6	UNKNOWN	SYBR	None				Undetermined							true	0.04	true	3	39			0	0	61.3091			N	Y	N	Y	Y
208	I16	false	HBx-PMH-L-L	mMAGEA6	UNKNOWN	SYBR	None				Undetermined							true	0.04	true	3	39			0	0	61.3091			N	Y	N	Y	Y
209	I17	false	HBx-PMH-L-L	mMAGEA6	UNKNOWN	SYBR	None				Undetermined							true	0.04	true	3	39			0	0	61.1806			N	Y	N	Y	Y
210	I18	false	HBx-PMH-L-L	mMAGEA6	UNKNOWN	SYBR	None				Undetermined							true	0.04	true	3	39			0	0	61.3091			N	Y	N	Y	Y
229	J13	false	Vec-PMH-L	HBx	UNKNOWN	SYBR	None				Undetermined	35.8939	0.647356					true	0.167205	true	3	39			0	0	61.3091			N	Y	N	Y	N
230	J14	false	Vec-PMH-L	HBx	UNKNOWN	SYBR	None	5.15944	1.20137	22.1578	36.541	35.8939	0.647356		18.8462	0.660665	-2.36721	true	0.167205	true	3	31			1.23305	0.978379	80.7071			N	N	Y	N	N
231	J15	false	Vec-PMH-L	HBx	UNKNOWN	SYBR	None	5.15944	1.20137	22.1578	35.247	35.8939	0.647356		18.8462	0.660665	-2.36721	true	0.167205	true	3	30			1.31179	0.969126	80.8356			N	N	Y	N	N
232	J16	false	HBx-PMH-L-L	HBx	UNKNOWN	SYBR	None	217409	206869	228486	20.08	20.102	0.0172069		3.48332	0.0258218	-17.7301	true	0.167205	true	3	15			1.31799	0.948028	81.221			N	N	N	N	N
233	J17	false	HBx-PMH-L-L	HBx	UNKNOWN	SYBR	None	217409	206869	228486	20.136	20.102	0.0172069		3.48332	0.0258218	-17.7301	true	0.167205	true	3	15			1.31222	0.965649	81.221			N	N	N	N	N
234	J18	false	HBx-PMH-L-L	HBx	UNKNOWN	SYBR	None	217409	206869	228486	20.09	20.102	0.0172069		3.48332	0.0258218	-17.7301	true	0.167205	true	3	15			1.31955	0.950792	81.221			N	N	N	N	N
253	K13	false	Vec-PMH-L	mFAM110C	UNKNOWN	SYBR	None	1.33407	1.01623	1.75132	28.434	28.5031	0.0508699		11.4553	0.141406	-0.415836	true	0.1725	true	3	23			1.31589	0.963152	90.3419			N	N	N	N	N
254	K14	false	Vec-PMH-L	mFAM110C	UNKNOWN	SYBR	None	1.33407	1.01623	1.75132	28.473	28.5031	0.0508699		11.4553	0.141406	-0.415836	true	0.1725	true	3	23			1.31636	0.967922	90.3419			N	N	N	N	N
255	K15	false	Vec-PMH-L	mFAM110C	UNKNOWN	SYBR	None	1.33407	1.01623	1.75132	28.602	28.5031	0.0508699		11.4553	0.141406	-0.415836	true	0.1725	true	3	23			1.31692	0.977919	90.3419			N	N	N	N	N
256	K16	false	HBx-PMH-L-L	mFAM110C	UNKNOWN	SYBR	None	1.16312	1.04964	1.28886	28.192	28.2718	0.0497454		11.6531	0.0533412	-0.217995	true	0.1725	true	3	23			1.32917	0.968753	90.3419			N	N	N	N	N
257	K17	false	HBx-PMH-L-L	mFAM110C	UNKNOWN	SYBR	None	1.16312	1.04964	1.28886	28.363	28.2718	0.0497454		11.6531	0.0533412	-0.217995	true	0.1725	true	3	23			1.32381	0.97399	90.3419			N	N	N	N	N
258	K18	false	HBx-PMH-L-L	mFAM110C	UNKNOWN	SYBR	None	1.16312	1.04964	1.28886	28.261	28.2718	0.0497454		11.6531	0.0533412	-0.217995	true	0.1725	true	3	23			1.32925	0.979816	90.3419			N	N	N	N	N
277	L13	false	Vec-PMH-L	mALDH8A1	UNKNOWN	SYBR	None	0.171215	0.116269	0.252126	29.33	29.6211	0.151766		12.5733	0.201099	2.54612	true	0.163338	true	3	24			1.2878	0.967432	84.3041			N	N	N	N	N
278	L14	false	Vec-PMH-L	mALDH8A1	UNKNOWN	SYBR	None	0.171215	0.116269	0.252126	29.693	29.6211	0.151766		12.5733	0.201099	2.54612	true	0.163338	true	3	24			1.28786	0.984608	84.3041			N	N	N	N	N
279	L15	false	Vec-PMH-L	mALDH8A1	UNKNOWN	SYBR	None	0.171215	0.116269	0.252126	29.84	29.6211	0.151766		12.5733	0.201099	2.54612	true	0.163338	true	3	25			1.28976	0.988858	84.3041			N	N	N	N	N
280	L16	false	HBx-PMH-L-L	mALDH8A1	UNKNOWN	SYBR	None	0.157685	0.11461	0.216948	29.431	29.3107	0.164668		12.6921	0.16579	2.66489	true	0.163338	true	3	24			1.28888	0.988381	84.3041			N	N	N	N	N
281	L17	false	HBx-PMH-L-L	mALDH8A1	UNKNOWN	SYBR	None	0.157685	0.11461	0.216948	29.516	29.3107	0.164668		12.6921	0.16579	2.66489	true	0.163338	true	3	24			1.29056	0.988982	84.3041			N	N	N	N	N
282	L18	false	HBx-PMH-L-L	mALDH8A1	UNKNOWN	SYBR	None	0.157685	0.11461	0.216948	28.985	29.3107	0.164668		12.6921	0.16579	2.66489	true	0.163338	true	3	24			1.30807	0.973616	84.3041			N	N	N	N	N
301	M13	false	Vec-PMH-L	mC8A	UNKNOWN	SYBR	None	0.187819	0.145322	0.242744	26.375	26.3671	0.0189833		9.31938	0.133297	2.41259	true	0.151329	true	3	21			1.33069	0.967447	83.4049			N	N	N	N	N
302	M14	false	Vec-PMH-L	mC8A	UNKNOWN	SYBR	None	0.187819	0.145322	0.242744	26.331	26.3671	0.0189833		9.31938	0.133297	2.41259	true	0.151329	true	3	21			1.29334	0.976015	83.4049			N	N	N	N	N
303	M15	false	Vec-PMH-L	mC8A	UNKNOWN	SYBR	None	0.187819	0.145322	0.242744	26.395	26.3671	0.0189833		9.31938	0.133297	2.41259	true	0.151329	true	3	21			1.32338	0.973231	83.4049			N	N	N	N	N
304	M16	false	HBx-PMH-L-L	mC8A	UNKNOWN	SYBR	None	0.152332	0.142403	0.162952	26.282	26.2401	0.0292531		9.62151	0.0350204	2.71471	true	0.151329	true	3	21			1.31167	0.959816	83.4049			N	N	N	N	N
305	M17	false	HBx-PMH-L-L	mC8A	UNKNOWN	SYBR	None	0.152332	0.142403	0.162952	26.184	26.2401	0.0292531		9.62151	0.0350204	2.71471	true	0.151329	true	3	21			1.2994	0.980581	83.4049			N	N	N	N	N
306	M18	false	HBx-PMH-L-L	mC8A	UNKNOWN	SYBR	None	0.152332	0.142403	0.162952	26.254	26.2401	0.0292531		9.62151	0.0350204	2.71471	true	0.151329	true	3	21			1.30122	0.974091	83.4049			N	N	N	N	N
325	N13	false	Vec-PMH-L	mCPEB3	UNKNOWN	SYBR	None	0.804336	0.60537	1.0687	28.493	28.3709	0.0663089		11.3232	0.147664	0.31413	true	0.193781	true	3	23			1.32337	0.979505	93.5535			N	N	N	N	N
326	N14	false	Vec-PMH-L	mCPEB3	UNKNOWN	SYBR	None	0.804336	0.60537	1.0687	28.355	28.3709	0.0663089		11.3232	0.147664	0.31413	true	0.193781	true	3	23			1.32727	0.970956	93.5535			N	N	N	N	N
327	N15	false	Vec-PMH-L	mCPEB3	UNKNOWN	SYBR	None	0.804336	0.60537	1.0687	28.265	28.3709	0.0663089		11.3232	0.147664	0.31413	true	0.193781	true	3	23			1.34592	0.954432	93.5535			N	N	N	N	N
328	N16	false	HBx-PMH-L-L	mCPEB3	UNKNOWN	SYBR	None	0.721597	0.681007	0.764605	28.06	28.0984	0.0231143		11.4798	0.0300825	0.470736	true	0.193781	true	3	22			1.33665	0.966921	93.425			N	N	N	N	N
329	N17	false	HBx-PMH-L-L	mCPEB3	UNKNOWN	SYBR	None	0.721597	0.681007	0.764605	28.096	28.0984	0.0231143		11.4798	0.0300825	0.470736	true	0.193781	true	3	22			1.32977	0.974932	93.425			N	N	N	N	N
330	N18	false	HBx-PMH-L-L	mCPEB3	UNKNOWN	SYBR	None	0.721597	0.681007	0.764605	28.14	28.0984	0.0231143		11.4798	0.0300825	0.470736	true	0.193781	true	3	23			1.33994	0.975407	93.425			N	N	N	N	N
Analysis Type	Singleplex
Endogenous Control	mCyclophilion
RQ Min/Max Confidence Level	95.0
Reference Sample	Vec-PMH-D

## Sheet: Melt Curve Raw Data
Block Type	384-Well Block
Calibration Background is expired	Yes
Calibration Background performed on	10-12-2018 11:47:46 PDT
Calibration FAM is expired	Yes
Calibration FAM performed on	10-23-2018 10:23:19 PDT
Calibration MELTDOCTOR is expired	Yes
Calibration MELTDOCTOR performed on	09-26-2017 21:22:46 PDT
Calibration NED is expired	Yes
Calibration NED performed on	10-23-2018 10:33:14 PDT
Calibration ROI is expired	Yes
Calibration ROI performed on	10-12-2018 09:37:21 PDT
Calibration ROX is expired	Yes
Calibration ROX performed on	10-23-2018 10:07:21 PDT
Calibration SYBR is expired	Yes
Calibration SYBR performed on	10-23-2018 09:57:53 PDT
Calibration TAMRA is expired	Yes
Calibration TAMRA performed on	10-23-2018 10:45:25 PDT
Calibration Uniformity is expired	Yes
Calibration Uniformity performed on	10-12-2018 10:06:59 PDT
Calibration VIC is expired	Yes
Calibration VIC performed on	10-23-2018 10:54:25 PDT
Chemistry	SYBR_GREEN
Date Created	09-12-2021 23:22:24 PDT
Experiment File Name	D:\NZZ\2021-09-12 215735.eds
Experiment Name	2021-09-12 215735
Experiment Run End Time	09-12-2021 16:37:35 PDT
Experiment Type	Comparative Cт (ΔΔCт)
Instrument Name	285880860
Instrument Serial Number	285880860
Instrument Type	QuantStudio 12K Flex
Passive Reference	ROX
Quantification Cycle Method	Ct
Signal Smoothing On	true
Stage/ Cycle where Analysis is performed	Stage 2, Step 2
Well	Well Position	Reading	Temperature	Fluorescence	Derivative
7	A7	1	60.1529	1.71318	0.0739608
7	A7	2	60.4098	1.70571	0.0747672
7	A7	3	60.6668	1.69627	0.0755288
7	A7	4	60.9237	1.68338	0.0760406
7	A7	5	61.1806	1.67271	0.0762285
7	A7	6	61.4375	1.66461	0.0761455
7	A7	7	61.6945	1.6561	0.0758981
7	A7	8	61.9514	1.64365	0.0755703
7	A7	9	62.2083	1.63315	0.0751999
7	A7	10	62.4652	1.62512	0.0748015
7	A7	11	62.7222	1.6138	0.0743981
7	A7	12	62.9791	1.60248	0.0740262
7	A7	13	63.236	1.59632	0.0737177
7	A7	14	63.493	1.58453	0.0734855
7	A7	15	63.7499	1.57451	0.0733271
7	A7	16	64.0068	1.56523	0.0732487
7	A7	17	64.2637	1.55567	0.0732886
7	A7	18	64.5207	1.54444	0.0735233
7	A7	19	64.7776	1.53772	0.074039
7	A7	20	65.0345	1.52557	0.0748855
7	A7	21	65.2915	1.51622	0.0760327
7	A7	22	65.5484	1.50941	0.0773496
7	A7	23	65.8053	1.49586	0.0786264
7	A7	24	66.0622	1.4843	0.079625
7	A7	25	66.3192	1.47489	0.0801528
7	A7	26	66.5761	1.46249	0.0801238
7	A7	27	66.833	1.45309	0.0796003
7	A7	28	67.09	1.4386	0.0787801
7	A7	29	67.3469	1.42838	0.0779239
7	A7	30	67.6038	1.42199	0.0772419
7	A7	31	67.8607	1.4122	0.0767933
7	A7	32	68.1177	1.40199	0.0764692
7	A7	33	68.3746	1.38705	0.0760773
7	A7	34	68.6315	1.37999	0.0754821
7	A7	35	68.8884	1.37036	0.07472
7	A7	36	69.1454	1.35668	0.0740244
7	A7	37	69.4023	1.34709	0.0737318
7	A7	38	69.6592	1.34237	0.0741111
7	A7	39	69.9162	1.33074	0.0752019
7	A7	40	70.1731	1.32576	0.0767609
7	A7	41	70.43	1.31146	0.0783537
7	A7	42	70.6869	1.29581	0.0795369
7	A7	43	70.9439	1.28736	0.0800199
7	A7	44	71.2008	1.27858	0.079726
7	A7	45	71.4577	1.26628	0.0787554
7	A7	46	71.7146	1.25408	0.0773079
7	A7	47	71.9716	1.24391	0.075622
7	A7	48	72.2285	1.23633	0.0739286
7	A7	49	72.4854	1.22539	0.0724182
7	A7	50	72.7424	1.21572	0.0712159
7	A7	51	72.9993	1.20813	0.0703764
7	A7	52	73.2562	1.19883	0.0699107
7	A7	53	73.5131	1.18697	0.0698124
7	A7	54	73.7701	1.17866	0.0700655
7	A7	55	74.027	1.17119	0.0706175
7	A7	56	74.2839	1.16325	0.0713483
7	A7	57	74.5408	1.14927	0.0720723
7	A7	58	74.7978	1.14166	0.0725879
7	A7	59	75.0547	1.13056	0.072759
7	A7	60	75.3116	1.12191	0.0725756
7	A7	61	75.5686	1.1091	0.0721614
7	A7	62	75.8255	1.10087	0.0717107
7	A7	63	76.0824	1.09257	0.0713836
7	A7	64	76.3393	1.08558	0.0712193
7	A7	65	76.5963	1.07327	0.0711251
7	A7	66	76.8532	1.06395	0.0709466
7	A7	67	77.1101	1.05184	0.070579
7	A7	68	77.3671	1.04317	0.0700356
7	A7	69	77.624	1.03656	0.0694404
7	A7	70	77.8809	1.02545	0.0689518
7	A7	71	78.1378	1.01586	0.0686835
7	A7	72	78.3948	1.00902	0.0686582
7	A7	73	78.6517	0.999113	0.0688132
7	A7	74	78.9086	0.989712	0.0690421
7	A7	75	79.1655	0.978453	0.0692413
7	A7	76	79.4225	0.971793	0.0693505
7	A7	77	79.6794	0.961433	0.0693641
7	A7	78	79.9363	0.950612	0.0693273
7	A7	79	80.1933	0.943811	0.0693245
7	A7	80	80.4502	0.932386	0.0694776
7	A7	81	80.7071	0.924453	0.0699769
7	A7	82	80.964	0.916181	0.071169
7	A7	83	81.221	0.903888	0.0737338
7	A7	84	81.4779	0.896544	0.0789659
7	A7	85	81.7348	0.88779	0.0891317
7	A7	86	81.9918	0.876252	0.107757
7	A7	87	82.2487	0.867234	0.139537
7	A7	88	82.5056	0.85565	0.189468
7	A7	89	82.7625	0.840672	0.260905
7	A7	90	83.0195	0.826019	0.352859
7	A7	91	83.2764	0.795024	0.457618
7	A7	92	83.5333	0.739916	0.560335
7	A7	93	83.7902	0.586991	0.641764
7	A7	94	84.0472	0.413322	0.683815
7	A7	95	84.3041	0.254259	0.675806
7	A7	96	84.561	0.131739	0.618459
7	A7	97	84.818	0.0636476	0.523645
7	A7	98	85.0749	0.0405804	0.410057
7	A7	99	85.3318	0.0341353	0.296988
7	A7	100	85.5887	0.032619	0.199049
7	A7	101	85.8457	0.0321816	0.123652
7	A7	102	86.1026	0.0314899	0.0714853
7	A7	103	86.3595	0.0309871	0.0388328
7	A7	104	86.6164	0.0309953	0.0202648
7	A7	105	86.8734	0.0304971	0.0106322
7	A7	106	87.1303	0.0294625	0.00603679
7	A7	107	87.3872	0.0288642	0.00397851
7	A7	108	87.6442	0.0290164	0.00307017
7	A7	109	87.9011	0.0290191	0.00264398
7	A7	110	88.158	0.0278641	0.00242324
7	A7	111	88.4149	0.0283359	0.00230813
7	A7	112	88.6719	0.0278796	0.00226039
7	A7	113	88.9288	0.0275926	0.00225283
7	A7	114	89.1857	0.0270337	0.0022548
7	A7	115	89.4427	0.0271092	0.0022353
7	A7	116	89.6996	0.0262252	0.00217288
7	A7	117	89.9565	0.0261003	0.00206467
7	A7	118	90.2134	0.0260772	0.00192803
7	A7	119	90.4704	0.025942	0.00179249
7	A7	120	90.7273	0.0253842	0.00168573
7	A7	121	90.9842	0.0260011	0.00162136
7	A7	122	91.2411	0.0250063	0.00159551
7	A7	123	91.4981	0.0248128	0.00159255
7	A7	124	91.755	0.0250339	0.00159506
7	A7	125	92.0119	0.0244807	0.00159093
7	A7	126	92.2689	0.0244951	0.001575
7	A7	127	92.5258	0.0240477	0.00154706
7	A7	128	92.7827	0.02386	0.00151012
7	A7	129	93.0396	0.0240381	0.00146958
7	A7	130	93.2966	0.0233913	0.00143145
7	A7	131	93.5535	0.0232197	0.00139722
7	A7	132	93.8104	0.0236924	0.00135723
7	A7	133	94.0674	0.0231567	0.00128841
7	A7	134	94.3243	0.022715	0.00116274
7	A7	135	94.5812	0.0222021	0.000964848
7	A7	136	94.8381	0.022183	0.000707548
8	A8	1	60.1529	1.73894	0.0774464
8	A8	2	60.4098	1.73305	0.077863
8	A8	3	60.6668	1.71946	0.0785618
8	A8	4	60.9237	1.70863	0.0795008
8	A8	5	61.1806	1.70243	0.0805854
8	A8	6	61.4375	1.69317	0.0816332
8	A8	7	61.6945	1.67896	0.0824044
8	A8	8	61.9514	1.66685	0.0826972
8	A8	9	62.2083	1.65138	0.0824494
8	A8	10	62.4652	1.64369	0.0817475
8	A8	11	62.7222	1.63606	0.0807583
8	A8	12	62.9791	1.62187	0.0796295
8	A8	13	63.236	1.60994	0.078448
8	A8	14	63.493	1.60065	0.0772652
8	A8	15	63.7499	1.59345	0.0761568
8	A8	16	64.0068	1.5765	0.0752562
8	A8	17	64.2637	1.57237	0.0747312
8	A8	18	64.5207	1.55929	0.074718
8	A8	19	64.7776	1.55306	0.0752448
8	A8	20	65.0345	1.54267	0.0761938
8	A8	21	65.2915	1.53222	0.0773285
8	A8	22	65.5484	1.51871	0.0783803
8	A8	23	65.8053	1.51052	0.0791434
8	A8	24	66.0622	1.49982	0.0795367
8	A8	25	66.3192	1.48464	0.0795978
8	A8	26	66.5761	1.47525	0.0794187
8	A8	27	66.833	1.46786	0.0790707
8	A8	28	67.09	1.45641	0.0785749
8	A8	29	67.3469	1.44452	0.0779365
8	A8	30	67.6038	1.43114	0.0772134
8	A8	31	67.8607	1.42127	0.0765345
8	A8	32	68.1177	1.41201	0.0760565
8	A8	33	68.3746	1.41024	0.0758876
8	A8	34	68.6315	1.38992	0.0760551
8	A8	35	68.8884	1.38042	0.0765191
8	A8	36	69.1454	1.3723	0.0771938
8	A8	37	69.4023	1.36237	0.0779439
8	A8	38	69.6592	1.35684	0.0785885
8	A8	39	69.9162	1.33632	0.0789551
8	A8	40	70.1731	1.32918	0.0789816
8	A8	41	70.43	1.31676	0.0787706
8	A8	42	70.6869	1.30554	0.0785343
8	A8	43	70.9439	1.30023	0.0784486
8	A8	44	71.2008	1.28855	0.0785227
8	A8	45	71.4577	1.27747	0.0785811
8	A8	46	71.7146	1.26409	0.0783774
8	A8	47	71.9716	1.25395	0.0777502
8	A8	48	72.2285	1.24398	0.076727
8	A8	49	72.4854	1.23205	0.0755186
8	A8	50	72.7424	1.22299	0.0744119
8	A8	51	72.9993	1.21212	0.0736421
8	A8	52	73.2562	1.2089	0.0733034
8	A8	53	73.5131	1.19452	0.0733484
8	A8	54	73.7701	1.18142	0.0736456
8	A8	55	74.027	1.17348	0.0740499
8	A8	56	74.2839	1.16768	0.0744298
8	A8	57	74.5408	1.15347	0.0746699
8	A8	58	74.7978	1.14271	0.0746767
8	A8	59	75.0547	1.13345	0.0744137
8	A8	60	75.3116	1.12279	0.073927
8	A8	61	75.5686	1.11154	0.0733356
8	A8	62	75.8255	1.1041	0.07277
8	A8	63	76.0824	1.0946	0.0722975
8	A8	64	76.3393	1.0842	0.071892
8	A8	65	76.5963	1.07527	0.0714602
8	A8	66	76.8532	1.06202	0.0709123
8	A8	67	77.1101	1.05495	0.0702256
8	A8	68	77.3671	1.04443	0.0694597
8	A8	69	77.624	1.03667	0.0687274
8	A8	70	77.8809	1.02528	0.0681401
8	A8	71	78.1378	1.01709	0.06777
8	A8	72	78.3948	1.01147	0.0676401
8	A8	73	78.6517	0.998568	0.0677425
8	A8	74	78.9086	0.987787	0.0680574
8	A8	75	79.1655	0.98276	0.0685527
8	A8	76	79.4225	0.972483	0.0691642
8	A8	77	79.6794	0.964383	0.0697877
8	A8	78	79.9363	0.951403	0.0703063
8	A8	79	80.1933	0.941691	0.0706506
8	A8	80	80.4502	0.9331	0.0708577
8	A8	81	80.7071	0.923704	0.0711182
8	A8	82	80.964	0.9148	0.0718499
8	A8	83	81.221	0.90374	0.0738527
8	A8	84	81.4779	0.893914	0.0785832
8	A8	85	81.7348	0.885279	0.0884962
8	A8	86	81.9918	0.876797	0.107293
8	A8	87	82.2487	0.868829	0.139775
8	A8	88	82.5056	0.853351	0.190922
8	A8	89	82.7625	0.842196	0.263975
8	A8	90	83.0195	0.824024	0.357787
8	A8	91	83.2764	0.795378	0.464522
8	A8	92	83.5333	0.72437	0.569248
8	A8	93	83.7902	0.587331	0.652607
8	A8	94	84.0472	0.403617	0.696291
8	A8	95	84.3041	0.23797	0.68929
8	A8	96	84.561	0.109319	0.632015
8	A8	97	84.818	0.0370724	0.536221
8	A8	98	85.0749	0.0135825	0.420773
8	A8	99	85.3318	0.00769695	0.305373
8	A8	100	85.5887	0.00546949	0.205088
8	A8	101	85.8457	0.00443458	0.12767
8	A8	102	86.1026	0.00453588	0.0739548
8	A8	103	86.3595	0.00311808	0.0402206
8	A8	104	86.6164	0.00305096	0.0209581
8	A8	105	86.8734	0.00285098	0.0109341
8	A8	106	87.1303	0.00247529	0.00618325
8	A8	107	87.3872	0.00191264	0.00414433
8	A8	108	87.6442	0.0014343	0.00335945
8	A8	109	87.9011	0.000948932	0.00308184
8	A8	110	88.158	0.000542526	0.00296338
8	A8	111	88.4149	0.000410459	0.00285871
8	A8	112	88.6719	-0.00030478	0.00271989
8	A8	113	88.9288	-0.00073354	0.00254519
8	A8	114	89.1857	-0.000808302	0.00235383
8	A8	115	89.4427	-0.00101992	0.00216999
8	A8	116	89.6996	-0.000889191	0.00201071
8	A8	117	89.9565	-0.00165873	0.00188
8	A8	118	90.2134	-0.00190691	0.00177264
8	A8	119	90.4704	-0.00205381	0.00168405
8	A8	120	90.7273	-0.00212151	0.00161708
8	A8	121	90.9842	-0.00220636	0.00157905
8	A8	122	91.2411	-0.00227718	0.00157177
8	A8	123	91.4981	-0.00297654	0.00158482
8	A8	124	91.755	-0.00279189	0.00159901
8	A8	125	92.0119	-0.00367331	0.00159745
8	A8	126	92.2689	-0.00322515	0.00157433
8	A8	127	92.5258	-0.00361496	0.0015344
8	A8	128	92.7827	-0.00379543	0.00148465
8	A8	129	93.0396	-0.00387579	0.0014267
8	A8	130	93.2966	-0.0044486	0.001356
8	A8	131	93.5535	-0.00450605	0.00126674
8	A8	132	93.8104	-0.004465	0.00115615
8	A8	133	94.0674	-0.00447953	0.00102407
8	A8	134	94.3243	-0.00490663	0.000870534
8	A8	135	94.5812	-0.00469172	0.000696509
8	A8	136	94.8381	-0.00559978	0.000508779
9	A9	1	60.1529	1.5955	0.0739802
9	A9	2	60.4098	1.58685	0.0740365
9	A9	3	60.6668	1.5769	0.0739579
9	A9	4	60.9237	1.56811	0.0737617
9	A9	5	61.1806	1.55614	0.0735761
9	A9	6	61.4375	1.54869	0.0735633
9	A9	7	61.6945	1.53934	0.073806
9	A9	8	61.9514	1.53166	0.0742473
9	A9	9	62.2083	1.52133	0.0747257
9	A9	10	62.4652	1.50355	0.0750688
9	A9	11	62.7222	1.50154	0.0751859
9	A9	12	62.9791	1.48756	0.0750995
9	A9	13	63.236	1.47958	0.0749142
9	A9	14	63.493	1.46658	0.0747496
9	A9	15	63.7499	1.45651	0.0746719
9	A9	16	64.0068	1.45246	0.0746543
9	A9	17	64.2637	1.43853	0.0745869
9	A9	18	64.5207	1.42735	0.0743458
9	A9	19	64.7776	1.41924	0.0738831
9	A9	20	65.0345	1.40482	0.0732841
9	A9	21	65.2915	1.39969	0.0727414
9	A9	22	65.5484	1.38814	0.0724687
9	A9	23	65.8053	1.38138	0.0726004
9	A9	24	66.0622	1.36888	0.0731386
9	A9	25	66.3192	1.36251	0.0739552
9	A9	26	66.5761	1.34655	0.0748558
9	A9	27	66.833	1.34609	0.0756579
9	A9	28	67.09	1.3262	0.0762589
9	A9	29	67.3469	1.31533	0.0766457
9	A9	30	67.6038	1.31149	0.0768469
9	A9	31	67.8607	1.29756	0.076861
9	A9	32	68.1177	1.28949	0.0766201
9	A9	33	68.3746	1.27778	0.0760392
9	A9	34	68.6315	1.26232	0.0751156
9	A9	35	68.8884	1.25787	0.073998
9	A9	36	69.1454	1.2455	0.0729717
9	A9	37	69.4023	1.23441	0.0723413
9	A9	38	69.6592	1.23079	0.0722886
9	A9	39	69.9162	1.2188	0.0727765
9	A9	40	70.1731	1.21038	0.0735634
9	A9	41	70.43	1.19767	0.0743207
9	A9	42	70.6869	1.18996	0.0747845
9	A9	43	70.9439	1.1748	0.0748649
9	A9	44	71.2008	1.16602	0.0746535
9	A9	45	71.4577	1.15955	0.0743295
9	A9	46	71.7146	1.14795	0.0740432
9	A9	47	71.9716	1.13778	0.0738369
9	A9	48	72.2285	1.12928	0.073653
9	A9	49	72.4854	1.11763	0.0733971
9	A9	50	72.7424	1.10749	0.0730085
9	A9	51	72.9993	1.09579	0.0724895
9	A9	52	73.2562	1.09194	0.0718924
9	A9	53	73.5131	1.07733	0.0712875
9	A9	54	73.7701	1.06734	0.0707333
9	A9	55	74.027	1.06073	0.0702652
9	A9	56	74.2839	1.05069	0.0698907
9	A9	57	74.5408	1.04099	0.0696063
9	A9	58	74.7978	1.03178	0.0694168
9	A9	59	75.0547	1.01978	0.0693506
9	A9	60	75.3116	1.01408	0.0694459
9	A9	61	75.5686	1.00516	0.0697105
9	A9	62	75.8255	0.994167	0.0700817
9	A9	63	76.0824	0.983759	0.0704132
9	A9	64	76.3393	0.977532	0.0705163
9	A9	65	76.5963	0.965562	0.0702417
9	A9	66	76.8532	0.953408	0.0695683
9	A9	67	77.1101	0.944999	0.0686439
9	A9	68	77.3671	0.935452	0.0677361
9	A9	69	77.624	0.929218	0.067109
9	A9	70	77.8809	0.920195	0.0668889
9	A9	71	78.1378	0.912659	0.0670094
9	A9	72	78.3948	0.902127	0.0672716
9	A9	73	78.6517	0.889477	0.067476
9	A9	74	78.9086	0.883516	0.0675333
9	A9	75	79.1655	0.872653	0.0674822
9	A9	76	79.4225	0.865394	0.0674227
9	A9	77	79.6794	0.857414	0.0674299
9	A9	78	79.9363	0.847286	0.0675234
9	A9	79	80.1933	0.836297	0.0677075
9	A9	80	80.4502	0.826397	0.0680371
9	A9	81	80.7071	0.82073	0.0686775
9	A9	82	80.964	0.811836	0.0699673
9	A9	83	81.221	0.799099	0.0725526
9	A9	84	81.4779	0.793252	0.0776446
9	A9	85	81.7348	0.780305	0.0873747
9	A9	86	81.9918	0.772168	0.105077
9	A9	87	82.2487	0.763404	0.1352
9	A9	88	82.5056	0.751614	0.182485
9	A9	89	82.7625	0.737954	0.25018
9	A9	90	83.0195	0.719332	0.337556
9	A9	91	83.2764	0.692697	0.437668
9	A9	92	83.5333	0.632297	0.53683
9	A9	93	83.7902	0.503431	0.616931
9	A9	94	84.0472	0.332517	0.660475
9	A9	95	84.3041	0.174171	0.656494
9	A9	96	84.561	0.0511514	0.604649
9	A9	97	84.818	-0.0212274	0.515437
9	A9	98	85.0749	-0.0459466	0.40642
9	A9	99	85.3318	-0.0525072	0.296349
9	A9	100	85.5887	-0.0539673	0.199884
9	A9	101	85.8457	-0.054341	0.124846
9	A9	102	86.1026	-0.0551984	0.0724121
9	A9	103	86.3595	-0.0556533	0.039256
9	A9	104	86.6164	-0.0561138	0.0201878
9	A9	105	86.8734	-0.0562472	0.0101835
9	A9	106	87.1303	-0.0565045	0.00540084
9	A9	107	87.3872	-0.0565726	0.00334911
9	A9	108	87.6442	-0.0567539	0.00260817
9	A9	109	87.9011	-0.0574606	0.00244214
9	A9	110	88.158	-0.0576981	0.00249105
9	A9	111	88.4149	-0.0581441	0.00258293
9	A9	112	88.6719	-0.0586855	0.00263735
9	A9	113	88.9288	-0.0586458	0.00261913
9	A9	114	89.1857	-0.0594072	0.00251609
9	A9	115	89.4427	-0.0597267	0.00233078
9	A9	116	89.6996	-0.0597724	0.00208168
9	A9	117	89.9565	-0.060582	0.00180596
9	A9	118	90.2134	-0.0603123	0.00155423
9	A9	119	90.4704	-0.0596328	0.00137368
9	A9	120	90.7273	-0.0605205	0.00128762
9	A9	121	90.9842	-0.060108	0.00128589
9	A9	122	91.2411	-0.0614646	0.00133437
9	A9	123	91.4981	-0.0609048	0.00139654
9	A9	124	91.755	-0.061181	0.00145038
9	A9	125	92.0119	-0.06115	0.00148957
9	A9	126	92.2689	-0.0614833	0.00151317
9	A9	127	92.5258	-0.0622629	0.00151655
9	A9	128	92.7827	-0.0616896	0.00149228
9	A9	129	93.0396	-0.062614	0.00143717
9	A9	130	93.2966	-0.0623818	0.001356
9	A9	131	93.5535	-0.0624706	0.00125723
9	A9	132	93.8104	-0.0625276	0.00114467
9	A9	133	94.0674	-0.06309	0.00101384
9	A9	134	94.3243	-0.0629878	0.000857217
9	A9	135	94.5812	-0.0632274	0.000674434
9	A9	136	94.8381	-0.0632672	0.000478798
10	A10	1	60.1529	1.5782	0.0743611
10	A10	2	60.4098	1.56554	0.074646
10	A10	3	60.6668	1.55506	0.0749114
10	A10	4	60.9237	1.54951	0.0751082
10	A10	5	61.1806	1.53786	0.0752292
10	A10	6	61.4375	1.5298	0.0752912
10	A10	7	61.6945	1.51388	0.0753131
10	A10	8	61.9514	1.50845	0.0753081
10	A10	9	62.2083	1.49882	0.0752908
10	A10	10	62.4652	1.48639	0.0752781
10	A10	11	62.7222	1.47409	0.075287
10	A10	12	62.9791	1.46928	0.0753247
10	A10	13	63.236	1.45708	0.0753907
10	A10	14	63.493	1.44596	0.0754784
10	A10	15	63.7499	1.43282	0.0755798
10	A10	16	64.0068	1.42773	0.0756854
10	A10	17	64.2637	1.41937	0.0757858
10	A10	18	64.5207	1.40105	0.0758886
10	A10	19	64.7776	1.39438	0.0760375
10	A10	20	65.0345	1.3878	0.0763145
10	A10	21	65.2915	1.37334	0.0768078
10	A10	22	65.5484	1.36323	0.0775497
10	A10	23	65.8053	1.35516	0.0784602
10	A10	24	66.0622	1.34542	0.0793379
10	A10	25	66.3192	1.3324	0.0799232
10	A10	26	66.5761	1.321	0.0800113
10	A10	27	66.833	1.30774	0.0795532
10	A10	28	67.09	1.29654	0.0786812
10	A10	29	67.3469	1.28815	0.0776504
10	A10	30	67.6038	1.27962	0.0767397
10	A10	31	67.8607	1.26676	0.0761669
10	A10	32	68.1177	1.25541	0.0760427
10	A10	33	68.3746	1.24869	0.0763462
10	A10	34	68.6315	1.23725	0.0769106
10	A10	35	68.8884	1.22806	0.0774575
10	A10	36	69.1454	1.2189	0.0777045
10	A10	37	69.4023	1.20077	0.077514
10	A10	38	69.6592	1.1916	0.0769867
10	A10	39	69.9162	1.18225	0.0764126
10	A10	40	70.1731	1.17272	0.0760922
10	A10	41	70.43	1.17003	0.0761502
10	A10	42	70.6869	1.15205	0.0764716
10	A10	43	70.9439	1.14219	0.0767988
10	A10	44	71.2008	1.13149	0.0769055
10	A10	45	71.4577	1.12261	0.0767215
10	A10	46	71.7146	1.10747	0.0763408
10	A10	47	71.9716	1.1029	0.0759338
10	A10	48	72.2285	1.09243	0.0756362
10	A10	49	72.4854	1.07817	0.0754834
10	A10	50	72.7424	1.07099	0.0754035
10	A10	51	72.9993	1.06324	0.0752687
10	A10	52	73.2562	1.04655	0.0749642
10	A10	53	73.5131	1.04	0.0744519
10	A10	54	73.7701	1.02736	0.0737972
10	A10	55	74.027	1.02045	0.0731458
10	A10	56	74.2839	1.00776	0.0726673
10	A10	57	74.5408	1.00033	0.0724788
10	A10	58	74.7978	0.990322	0.0725911
10	A10	59	75.0547	0.980874	0.0728958
10	A10	60	75.3116	0.971817	0.0731959
10	A10	61	75.5686	0.958469	0.0732815
10	A10	62	75.8255	0.950305	0.0730145
10	A10	63	76.0824	0.940104	0.0723901
10	A10	64	76.3393	0.927646	0.0715493
10	A10	65	76.5963	0.920102	0.0707301
10	A10	66	76.8532	0.911949	0.0701687
10	A10	67	77.1101	0.899692	0.0699941
10	A10	68	77.3671	0.895826	0.0701609
10	A10	69	77.624	0.883056	0.0704639
10	A10	70	77.8809	0.872203	0.0706363
10	A10	71	78.1378	0.86405	0.0704879
10	A10	72	78.3948	0.849735	0.0700041
10	A10	73	78.6517	0.843763	0.0693451
10	A10	74	78.9086	0.833701	0.0687485
10	A10	75	79.1655	0.828298	0.0683959
10	A10	76	79.4225	0.816529	0.0683344
10	A10	77	79.6794	0.807521	0.0684899
10	A10	78	79.9363	0.796065	0.068751
10	A10	79	80.1933	0.789427	0.0690535
10	A10	80	80.4502	0.77834	0.0694266
10	A10	81	80.7071	0.768652	0.0700121
10	A10	82	80.964	0.762203	0.0711252
10	A10	83	81.221	0.750326	0.0734178
10	A10	84	81.4779	0.738069	0.078168
10	A10	85	81.7348	0.732271	0.0876374
10	A10	86	81.9918	0.722646	0.105342
10	A10	87	82.2487	0.711507	0.135953
10	A10	88	82.5056	0.700558	0.184469
10	A10	89	82.7625	0.688248	0.254414
10	A10	90	83.0195	0.670581	0.34528
10	A10	91	83.2764	0.64015	0.450168
10	A10	92	83.5333	0.579455	0.555113
10	A10	93	83.7902	0.450775	0.641336
10	A10	94	84.0472	0.269971	0.690336
10	A10	95	84.3041	0.102681	0.690063
10	A10	96	84.561	-0.0310791	0.639359
10	A10	97	84.818	-0.111949	0.548473
10	A10	98	85.0749	-0.141092	0.435378
10	A10	99	85.3318	-0.148935	0.319746
10	A10	100	85.5887	-0.151258	0.217327
10	A10	101	85.8457	-0.152398	0.136876
10	A10	102	86.1026	-0.152517	0.0801376
10	A10	103	86.3595	-0.15286	0.0439512
10	A10	104	86.6164	-0.153711	0.0229934
10	A10	105	86.8734	-0.153891	0.0119548
10	A10	106	87.1303	-0.154462	0.00668555
10	A10	107	87.3872	-0.15454	0.00444174
10	A10	108	87.6442	-0.154954	0.00362906
10	A10	109	87.9011	-0.155767	0.00340822
10	A10	110	88.158	-0.156456	0.00336861
10	A10	111	88.4149	-0.156711	0.00332502
10	A10	112	88.6719	-0.15754	0.00321039
10	A10	113	88.9288	-0.157524	0.00301937
10	A10	114	89.1857	-0.157584	0.0027745
10	A10	115	89.4427	-0.15867	0.0025063
10	A10	116	89.6996	-0.158568	0.0022456
10	A10	117	89.9565	-0.158962	0.00202248
10	A10	118	90.2134	-0.158531	0.00186306
10	A10	119	90.4704	-0.159232	0.00178123
10	A10	120	90.7273	-0.158853	0.00177134
10	A10	121	90.9842	-0.15994	0.00181096
10	A10	122	91.2411	-0.160009	0.00187414
10	A10	123	91.4981	-0.160086	0.00194512
10	A10	124	91.755	-0.160434	0.0020204
10	A10	125	92.0119	-0.160527	0.00209677
10	A10	126	92.2689	-0.160612	0.00215676
10	A10	127	92.5258	-0.161484	0.00216592
10	A10	128	92.7827	-0.162196	0.00208732
10	A10	129	93.0396	-0.16215	0.00190321
10	A10	130	93.2966	-0.161996	0.0016277
10	A10	131	93.5535	-0.162522	0.00130144
10	A10	132	93.8104	-0.162333	0.000973308
10	A10	133	94.0674	-0.162437	0.000681921
10	A10	134	94.3243	-0.162168	0.000447044
10	A10	135	94.5812	-0.162897	0.000271714
10	A10	136	94.8381	-0.16215	0.00014946
11	A11	1	60.1529	1.74816	0.0744402
11	A11	2	60.4098	1.73726	0.0747021
11	A11	3	60.6668	1.73104	0.0750053
11	A11	4	60.9237	1.71938	0.0752963
11	A11	5	61.1806	1.70864	0.0755725
11	A11	6	61.4375	1.70317	0.0758715
11	A11	7	61.6945	1.68809	0.0762293
11	A11	8	61.9514	1.67986	0.0766458
11	A11	9	62.2083	1.67089	0.0770654
11	A11	10	62.4652	1.65878	0.0773839
11	A11	11	62.7222	1.65035	0.0774688
11	A11	12	62.9791	1.63596	0.0772057
11	A11	13	63.236	1.63051	0.0765567
11	A11	14	63.493	1.61463	0.0756128
11	A11	15	63.7499	1.60721	0.074603
11	A11	16	64.0068	1.59572	0.0738346
11	A11	17	64.2637	1.58791	0.0735807
11	A11	18	64.5207	1.57992	0.0739592
11	A11	19	64.7776	1.57192	0.0748751
11	A11	20	65.0345	1.55864	0.0760565
11	A11	21	65.2915	1.54914	0.0771656
11	A11	22	65.5484	1.5377	0.0779252
11	A11	23	65.8053	1.52847	0.0782121
11	A11	24	66.0622	1.5162	0.0780753
11	A11	25	66.3192	1.50293	0.0776937
11	A11	26	66.5761	1.49557	0.0772903
11	A11	27	66.833	1.48935	0.0770398
11	A11	28	67.09	1.47243	0.0770195
11	A11	29	67.3469	1.46599	0.0772076
11	A11	30	67.6038	1.45494	0.0775278
11	A11	31	67.8607	1.44416	0.0778983
11	A11	32	68.1177	1.43431	0.0782639
11	A11	33	68.3746	1.42347	0.0785968
11	A11	34	68.6315	1.4088	0.078869
11	A11	35	68.8884	1.40659	0.0790187
11	A11	36	69.1454	1.39018	0.0789519
11	A11	37	69.4023	1.38016	0.0785835
11	A11	38	69.6592	1.36882	0.0779142
11	A11	39	69.9162	1.35952	0.0770776
11	A11	40	70.1731	1.34425	0.0763066
11	A11	41	70.43	1.34246	0.0758292
11	A11	42	70.6869	1.32978	0.0757503
11	A11	43	70.9439	1.31984	0.0759921
11	A11	44	71.2008	1.30921	0.0763276
11	A11	45	71.4577	1.29876	0.0764854
11	A11	46	71.7146	1.28826	0.0762737
11	A11	47	71.9716	1.27869	0.0756607
11	A11	48	72.2285	1.26342	0.0747862
11	A11	49	72.4854	1.2578	0.0738979
11	A11	50	72.7424	1.24978	0.0732516
11	A11	51	72.9993	1.23869	0.0730096
11	A11	52	73.2562	1.22811	0.0731938
11	A11	53	73.5131	1.21841	0.073694
11	A11	54	73.7701	1.21333	0.0743243
11	A11	55	74.027	1.1976	0.0749052
11	A11	56	74.2839	1.1867	0.0753268
11	A11	57	74.5408	1.1778	0.075564
11	A11	58	74.7978	1.1702	0.0756471
11	A11	59	75.0547	1.15765	0.0756017
11	A11	60	75.3116	1.14787	0.0754094
11	A11	61	75.5686	1.13711	0.0750136
11	A11	62	75.8255	1.12864	0.0743561
11	A11	63	76.0824	1.11622	0.0734255
11	A11	64	76.3393	1.10721	0.0722814
11	A11	65	76.5963	1.09718	0.0710493
11	A11	66	76.8532	1.08903	0.0698967
11	A11	67	77.1101	1.07831	0.0689924
11	A11	68	77.3671	1.07115	0.0684708
11	A11	69	77.624	1.0612	0.0683999
11	A11	70	77.8809	1.05276	0.0687571
11	A11	71	78.1378	1.04305	0.0694173
11	A11	72	78.3948	1.03595	0.070174
11	A11	73	78.6517	1.02488	0.0707974
11	A11	74	78.9086	1.01308	0.071115
11	A11	75	79.1655	1.00334	0.071074
11	A11	76	79.4225	0.993909	0.0707466
11	A11	77	79.6794	0.987145	0.0702823
11	A11	78	79.9363	0.977715	0.0698533
11	A11	79	80.1933	0.965328	0.0696324
11	A11	80	80.4502	0.955236	0.0697951
11	A11	81	80.7071	0.95002	0.0705361
11	A11	82	80.964	0.941972	0.0721066
11	A11	83	81.221	0.929981	0.0749497
11	A11	84	81.4779	0.920215	0.0800023
11	A11	85	81.7348	0.90895	0.0891423
11	A11	86	81.9918	0.897868	0.105597
11	A11	87	82.2487	0.889564	0.133989
11	A11	88	82.5056	0.878296	0.179596
11	A11	89	82.7625	0.86521	0.246569
11	A11	90	83.0195	0.84972	0.335277
11	A11	91	83.2764	0.821254	0.439708
11	A11	92	83.5333	0.773139	0.546459
11	A11	93	83.7902	0.647473	0.636663
11	A11	94	84.0472	0.470972	0.691005
11	A11	95	84.3041	0.29806	0.696133
11	A11	96	84.561	0.161168	0.649585
11	A11	97	84.818	0.0771585	0.560786
11	A11	98	85.0749	0.0448402	0.447613
11	A11	99	85.3318	0.0378032	0.330262
11	A11	100	85.5887	0.035144	0.225309
11	A11	101	85.8457	0.0345162	0.142281
11	A11	102	86.1026	0.0345991	0.0834098
11	A11	103	86.3595	0.0335166	0.0457069
11	A11	104	86.6164	0.032946	0.0237959
11	A11	105	86.8734	0.032515	0.0122178
11	A11	106	87.1303	0.0328396	0.00667127
11	A11	107	87.3872	0.0319573	0.00429863
11	A11	108	87.6442	0.0321527	0.0034313
11	A11	109	87.9011	0.030999	0.00318517
11	A11	110	88.158	0.0306443	0.00312629
11	A11	111	88.4149	0.029981	0.00306389
11	A11	112	88.6719	0.029738	0.00294007
11	A11	113	88.9288	0.0296685	0.00276797
11	A11	114	89.1857	0.0291821	0.00258925
11	A11	115	89.4427	0.0289973	0.00244323
11	A11	116	89.6996	0.028746	0.00234946
11	A11	117	89.9565	0.0282473	0.00230409
11	A11	118	90.2134	0.0284231	0.00228596
11	A11	119	90.4704	0.0274238	0.00226655
11	A11	120	90.7273	0.0274654	0.00221957
11	A11	121	90.9842	0.0269878	0.0021281
11	A11	122	91.2411	0.027115	0.00198926
11	A11	123	91.4981	0.0262742	0.00181681
11	A11	124	91.755	0.0263244	0.00164045
11	A11	125	92.0119	0.0262147	0.00149906
11	A11	126	92.2689	0.0263206	0.00142697
11	A11	127	92.5258	0.0266716	0.00143852
11	A11	128	92.7827	0.0255289	0.00152036
11	A11	129	93.0396	0.0252228	0.00163686
11	A11	130	93.2966	0.0254086	0.00174396
11	A11	131	93.5535	0.0254125	0.00180134
11	A11	132	93.8104	0.0244053	0.00177832
11	A11	133	94.0674	0.0245521	0.00165708
11	A11	134	94.3243	0.0237728	0.00143802
11	A11	135	94.5812	0.024154	0.00114481
11	A11	136	94.8381	0.0239263	0.000821647
12	A12	1	60.1529	1.65349	0.0683833
12	A12	2	60.4098	1.64978	0.0693645
12	A12	3	60.6668	1.63399	0.0703966
12	A12	4	60.9237	1.63133	0.0712182
12	A12	5	61.1806	1.61322	0.0716744
12	A12	6	61.4375	1.60639	0.0717451
12	A12	7	61.6945	1.59837	0.0714903
12	A12	8	61.9514	1.58861	0.0709889
12	A12	9	62.2083	1.57745	0.0703145
12	A12	10	62.4652	1.5668	0.0695629
12	A12	11	62.7222	1.55648	0.0688663
12	A12	12	62.9791	1.54896	0.0683519
12	A12	13	63.236	1.54142	0.0680699
12	A12	14	63.493	1.53104	0.0679619
12	A12	15	63.7499	1.52377	0.0679104
12	A12	16	64.0068	1.51047	0.0678534
12	A12	17	64.2637	1.49792	0.0678532
12	A12	18	64.5207	1.49475	0.0680627
12	A12	19	64.7776	1.4856	0.0686074
12	A12	20	65.0345	1.47745	0.0694718
12	A12	21	65.2915	1.46441	0.0704796
12	A12	22	65.5484	1.4543	0.0713732
12	A12	23	65.8053	1.44985	0.071941
12	A12	24	66.0622	1.43249	0.0721197
12	A12	25	66.3192	1.42216	0.072007
12	A12	26	66.5761	1.41568	0.0717885
12	A12	27	66.833	1.40558	0.0716107
12	A12	28	67.09	1.3965	0.0714877
12	A12	29	67.3469	1.38679	0.071305
12	A12	30	67.6038	1.3744	0.0709227
12	A12	31	67.8607	1.36706	0.070306
12	A12	32	68.1177	1.34912	0.0695833
12	A12	33	68.3746	1.34796	0.0689917
12	A12	34	68.6315	1.33944	0.0687601
12	A12	35	68.8884	1.32885	0.0690016
12	A12	36	69.1454	1.31635	0.0696844
12	A12	37	69.4023	1.30746	0.0706575
12	A12	38	69.6592	1.30379	0.0717092
12	A12	39	69.9162	1.28831	0.0726208
12	A12	40	70.1731	1.27718	0.0732231
12	A12	41	70.43	1.2678	0.0734407
12	A12	42	70.6869	1.25763	0.0733008
12	A12	43	70.9439	1.2479	0.0729056
12	A12	44	71.2008	1.23727	0.0723728
12	A12	45	71.4577	1.22695	0.07179
12	A12	46	71.7146	1.21892	0.071198
12	A12	47	71.9716	1.20908	0.0706094
12	A12	48	72.2285	1.19667	0.0700432
12	A12	49	72.4854	1.18874	0.0695446
12	A12	50	72.7424	1.17907	0.0691842
12	A12	51	72.9993	1.17134	0.0690214
12	A12	52	73.2562	1.1597	0.06907
12	A12	53	73.5131	1.15007	0.0692728
12	A12	54	73.7701	1.14349	0.0695068
12	A12	55	74.027	1.13195	0.0696291
12	A12	56	74.2839	1.12081	0.0695341
12	A12	57	74.5408	1.11093	0.069207
12	A12	58	74.7978	1.10097	0.0687199
12	A12	59	75.0547	1.09367	0.068183
12	A12	60	75.3116	1.08468	0.0676813
12	A12	61	75.5686	1.07432	0.0672508
12	A12	62	75.8255	1.06545	0.0669094
12	A12	63	76.0824	1.05463	0.0666985
12	A12	64	76.3393	1.04531	0.0666824
12	A12	65	76.5963	1.03907	0.0668892
12	A12	66	76.8532	1.03071	0.0672359
12	A12	67	77.1101	1.01903	0.067519
12	A12	68	77.3671	1.01097	0.0674958
12	A12	69	77.624	0.995524	0.0670122
12	A12	70	77.8809	0.989722	0.0661005
12	A12	71	78.1378	0.982597	0.0649821
12	A12	72	78.3948	0.970949	0.0639854
12	A12	73	78.6517	0.963055	0.0634138
12	A12	74	78.9086	0.955865	0.063427
12	A12	75	79.1655	0.950649	0.0639785
12	A12	76	79.4225	0.939214	0.0648369
12	A12	77	79.6794	0.928653	0.0656912
12	A12	78	79.9363	0.918703	0.0662897
12	A12	79	80.1933	0.909734	0.0665468
12	A12	80	80.4502	0.899538	0.066573
12	A12	81	80.7071	0.892535	0.0666532
12	A12	82	80.964	0.883154	0.0672461
12	A12	83	81.221	0.872661	0.0690928
12	A12	84	81.4779	0.864764	0.0734699
12	A12	85	81.7348	0.855552	0.0825446
12	A12	86	81.9918	0.847474	0.0996686
12	A12	87	82.2487	0.835163	0.129311
12	A12	88	82.5056	0.827154	0.176259
12	A12	89	82.7625	0.814513	0.243845
12	A12	90	83.0195	0.797588	0.331474
12	A12	91	83.2764	0.769979	0.432403
12	A12	92	83.5333	0.705194	0.533187
12	A12	93	83.7902	0.578048	0.615917
12	A12	94	84.0472	0.404456	0.663078
12	A12	95	84.3041	0.245234	0.663315
12	A12	96	84.561	0.115854	0.615527
12	A12	97	84.818	0.0331577	0.529304
12	A12	98	85.0749	0.000985463	0.421526
12	A12	99	85.3318	-0.00728231	0.310776
12	A12	100	85.5887	-0.00955685	0.212105
12	A12	101	85.8457	-0.00984989	0.134077
12	A12	102	86.1026	-0.0108931	0.0786343
12	A12	103	86.3595	-0.0106533	0.042981
12	A12	104	86.6164	-0.0114368	0.022137
12	A12	105	86.8734	-0.0114562	0.0110257
12	A12	106	87.1303	-0.0116983	0.00562111
12	A12	107	87.3872	-0.0122204	0.00323573
12	A12	108	87.6442	-0.0118016	0.00230545
12	A12	109	87.9011	-0.0124066	0.00201599
12	A12	110	88.158	-0.0129743	0.00197594
12	A12	111	88.4149	-0.0129071	0.00200399
12	A12	112	88.6719	-0.013269	0.00201755
12	A12	113	88.9288	-0.0140029	0.00198382
12	A12	114	89.1857	-0.0139564	0.00189873
12	A12	115	89.4427	-0.0142648	0.00177347
12	A12	116	89.6996	-0.0140344	0.00162263
12	A12	117	89.9565	-0.0146172	0.00145693
12	A12	118	90.2134	-0.0149689	0.00128424
12	A12	119	90.4704	-0.0151404	0.00111625
12	A12	120	90.7273	-0.0148069	0.000972136
12	A12	121	90.9842	-0.0148096	0.000872988
12	A12	122	91.2411	-0.0149472	0.000830114
12	A12	123	91.4981	-0.0153386	0.000837308
12	A12	124	91.755	-0.015405	0.000873884
12	A12	125	92.0119	-0.0154176	0.000915567
12	A12	126	92.2689	-0.0157945	0.000944316
12	A12	127	92.5258	-0.0155341	0.000951273
12	A12	128	92.7827	-0.0159946	0.000934339
12	A12	129	93.0396	-0.0161451	0.00089522
12	A12	130	93.2966	-0.0162864	0.0008382
12	A12	131	93.5535	-0.0160115	0.000769069
12	A12	132	93.8104	-0.0165118	0.000692472
12	A12	133	94.0674	-0.0162421	0.000609184
12	A12	134	94.3243	-0.0165127	0.000516539
12	A12	135	94.5812	-0.0168002	0.000412811
12	A12	136	94.8381	-0.0165907	0.000302135
13	A13	1	60.1529	1.60782	0.0695868
13	A13	2	60.4098	1.60091	0.0686504
13	A13	3	60.6668	1.59055	0.067758
13	A13	4	60.9237	1.58443	0.0672411
13	A13	5	61.1806	1.57904	0.0673488
13	A13	6	61.4375	1.57291	0.0680875
13	A13	7	61.6945	1.56184	0.0692056
13	A13	8	61.9514	1.55286	0.0703416
13	A13	9	62.2083	1.54106	0.0712476
13	A13	10	62.4652	1.53302	0.0719131
13	A13	11	62.7222	1.51924	0.0725074
13	A13	12	62.9791	1.51673	0.073179
13	A13	13	63.236	1.50979	0.0738849
13	A13	14	63.493	1.49661	0.0743921
13	A13	15	63.7499	1.48609	0.0744646
13	A13	16	64.0068	1.47255	0.0740846
13	A13	17	64.2637	1.46163	0.0735286
13	A13	18	64.5207	1.45899	0.0732323
13	A13	19	64.7776	1.45117	0.0735436
13	A13	20	65.0345	1.43993	0.0745278
13	A13	21	65.2915	1.42819	0.0759384
13	A13	22	65.5484	1.42328	0.0773526
13	A13	23	65.8053	1.40948	0.0783627
13	A13	24	66.0622	1.39944	0.0787509
13	A13	25	66.3192	1.38399	0.078553
13	A13	26	66.5761	1.3776	0.0780132
13	A13	27	66.833	1.37084	0.0774434
13	A13	28	67.09	1.35633	0.0770812
13	A13	29	67.3469	1.3497	0.076999
13	A13	30	67.6038	1.33873	0.0771107
13	A13	31	67.8607	1.33068	0.0772558
13	A13	32	68.1177	1.31763	0.0773117
13	A13	33	68.3746	1.30811	0.0772687
13	A13	34	68.6315	1.29541	0.0772264
13	A13	35	68.8884	1.29193	0.0773232
13	A13	36	69.1454	1.27775	0.077634
13	A13	37	69.4023	1.27083	0.0781164
13	A13	38	69.6592	1.25801	0.0786276
13	A13	39	69.9162	1.24822	0.0789927
13	A13	40	70.1731	1.24006	0.0790863
13	A13	41	70.43	1.22348	0.0788745
13	A13	42	70.6869	1.22079	0.0784189
13	A13	43	70.9439	1.2061	0.0778429
13	A13	44	71.2008	1.19612	0.077286
13	A13	45	71.4577	1.18789	0.0768528
13	A13	46	71.7146	1.18018	0.0765786
13	A13	47	71.9716	1.16638	0.0764249
13	A13	48	72.2285	1.16025	0.0763044
13	A13	49	72.4854	1.14767	0.0761294
13	A13	50	72.7424	1.13707	0.075848
13	A13	51	72.9993	1.13061	0.0754575
13	A13	52	73.2562	1.11791	0.0749908
13	A13	53	73.5131	1.10894	0.0744944
13	A13	54	73.7701	1.09991	0.0740098
13	A13	55	74.027	1.08985	0.0735666
13	A13	56	74.2839	1.08152	0.0731821
13	A13	57	74.5408	1.06995	0.0728738
13	A13	58	74.7978	1.06278	0.0726602
13	A13	59	75.0547	1.05254	0.0725554
13	A13	60	75.3116	1.04228	0.072544
13	A13	61	75.5686	1.03522	0.0725604
13	A13	62	75.8255	1.02568	0.0724962
13	A13	63	76.0824	1.0158	0.0722522
13	A13	64	76.3393	1.00334	0.0718066
13	A13	65	76.5963	0.996274	0.0712488
13	A13	66	76.8532	0.985137	0.0707418
13	A13	67	77.1101	0.9807	0.070429
13	A13	68	77.3671	0.971106	0.0703576
13	A13	69	77.624	0.958712	0.0704713
13	A13	70	77.8809	0.950685	0.0706705
13	A13	71	78.1378	0.942848	0.0708832
13	A13	72	78.3948	0.930251	0.0710858
13	A13	73	78.6517	0.926102	0.0712705
13	A13	74	78.9086	0.914082	0.0714019
13	A13	75	79.1655	0.90548	0.0714135
13	A13	76	79.4225	0.895815	0.0712507
13	A13	77	79.6794	0.884436	0.0709255
13	A13	78	79.9363	0.877275	0.0705326
13	A13	79	80.1933	0.868371	0.0702172
13	A13	80	80.4502	0.860861	0.0701309
13	A13	81	80.7071	0.848951	0.0704313
13	A13	82	80.964	0.842716	0.0713738
13	A13	83	81.221	0.831396	0.0735057
13	A13	84	81.4779	0.823319	0.0779536
13	A13	85	81.7348	0.814321	0.0867503
13	A13	86	81.9918	0.804591	0.103082
13	A13	87	82.2487	0.795022	0.131207
13	A13	88	82.5056	0.78579	0.175726
13	A13	89	82.7625	0.77362	0.23994
13	A13	90	83.0195	0.755369	0.323485
13	A13	91	83.2764	0.727899	0.420079
13	A13	92	83.5333	0.675986	0.516766
13	A13	93	83.7902	0.569204	0.595902
13	A13	94	84.0472	0.408536	0.639956
13	A13	95	84.3041	0.249451	0.637482
13	A13	96	84.561	0.129728	0.587531
13	A13	97	84.818	0.066989	0.50021
13	A13	98	85.0749	0.0481611	0.393029
13	A13	99	85.3318	0.0445138	0.284886
13	A13	100	85.5887	0.0423454	0.190536
13	A13	101	85.8457	0.0419774	0.117728
13	A13	102	86.1026	0.041767	0.0674301
13	A13	103	86.3595	0.0416976	0.0361054
13	A13	104	86.6164	0.0410529	0.0184454
13	A13	105	86.8734	0.0407043	0.00941667
13	A13	106	87.1303	0.0403827	0.00523899
13	A13	107	87.3872	0.0400206	0.00350955
13	A13	108	87.6442	0.0399262	0.0028928
13	A13	109	87.9011	0.0396071	0.00272211
13	A13	110	88.158	0.0386369	0.00268877
13	A13	111	88.4149	0.0383906	0.00265543
13	A13	112	88.6719	0.0385546	0.00256361
13	A13	113	88.9288	0.0379822	0.00239467
13	A13	114	89.1857	0.0374619	0.00215678
13	A13	115	89.4427	0.0369563	0.00188269
13	A13	116	89.6996	0.0372939	0.00162557
13	A13	117	89.9565	0.0372515	0.0014432
13	A13	118	90.2134	0.0378609	0.00137293
13	A13	119	90.4704	0.0369952	0.00141292
13	A13	120	90.7273	0.036359	0.00152505
13	A13	121	90.9842	0.0362327	0.00165836
13	A13	122	91.2411	0.0364425	0.00177441
13	A13	123	91.4981	0.035983	0.00185586
13	A13	124	91.755	0.0356245	0.0018962
13	A13	125	92.0119	0.0358231	0.00188642
13	A13	126	92.2689	0.0348395	0.00181446
13	A13	127	92.5258	0.0345951	0.00167839
13	A13	128	92.7827	0.0345605	0.00149891
13	A13	129	93.0396	0.034687	0.00131555
13	A13	130	93.2966	0.0351765	0.00116615
13	A13	131	93.5535	0.0343577	0.00106455
13	A13	132	93.8104	0.0340587	0.00099421
13	A13	133	94.0674	0.0339861	0.000921865
13	A13	134	94.3243	0.0342259	0.000819467
13	A13	135	94.5812	0.0340116	0.000678926
13	A13	136	94.8381	0.0334836	0.000512793
14	A14	1	60.1529	1.53895	0.0691226
14	A14	2	60.4098	1.53448	0.0684729
14	A14	3	60.6668	1.52597	0.0677568
14	A14	4	60.9237	1.51987	0.0671027
14	A14	5	61.1806	1.51125	0.0666474
14	A14	6	61.4375	1.499	0.0664905
14	A14	7	61.6945	1.49676	0.0666657
14	A14	8	61.9514	1.48439	0.0671439
14	A14	9	62.2083	1.47594	0.0678642
14	A14	10	62.4652	1.47139	0.06878
14	A14	11	62.7222	1.45481	0.069877
14	A14	12	62.9791	1.45001	0.0711484
14	A14	13	63.236	1.44264	0.0725366
14	A14	14	63.493	1.4334	0.0738935
14	A14	15	63.7499	1.42004	0.075002
14	A14	16	64.0068	1.41183	0.0756614
14	A14	17	64.2637	1.40096	0.0757919
14	A14	18	64.5207	1.39175	0.0754986
14	A14	19	64.7776	1.37835	0.0750422
14	A14	20	65.0345	1.37192	0.0747333
14	A14	21	65.2915	1.36247	0.0747948
14	A14	22	65.5484	1.35624	0.0752625
14	A14	23	65.8053	1.34452	0.0759933
14	A14	24	66.0622	1.33156	0.0767614
14	A14	25	66.3192	1.32465	0.0773844
14	A14	26	66.5761	1.31168	0.0777979
14	A14	27	66.833	1.30253	0.0780535
14	A14	28	67.09	1.29413	0.0782464
14	A14	29	67.3469	1.2799	0.0784442
14	A14	30	67.6038	1.27492	0.078645
14	A14	31	67.8607	1.2627	0.0787933
14	A14	32	68.1177	1.25062	0.0788303
14	A14	33	68.3746	1.24128	0.0787321
14	A14	34	68.6315	1.22856	0.0785065
14	A14	35	68.8884	1.22354	0.0781595
14	A14	36	69.1454	1.21201	0.077683
14	A14	37	69.4023	1.19867	0.0770804
14	A14	38	69.6592	1.18977	0.0764213
14	A14	39	69.9162	1.17946	0.0758447
14	A14	40	70.1731	1.16972	0.0755005
14	A14	41	70.43	1.16513	0.0754479
14	A14	42	70.6869	1.1519	0.0756095
14	A14	43	70.9439	1.14237	0.0758164
14	A14	44	71.2008	1.13072	0.0759151
14	A14	45	71.4577	1.12165	0.075851
14	A14	46	71.7146	1.11119	0.0756724
14	A14	47	71.9716	1.10352	0.0754581
14	A14	48	72.2285	1.09314	0.0752421
14	A14	49	72.4854	1.08394	0.0749921
14	A14	50	72.7424	1.07196	0.0746508
14	A14	51	72.9993	1.06332	0.0742019
14	A14	52	73.2562	1.05232	0.0736966
14	A14	53	73.5131	1.04495	0.0732346
14	A14	54	73.7701	1.03491	0.0729056
14	A14	55	74.027	1.02492	0.0727418
14	A14	56	74.2839	1.01707	0.0727031
14	A14	57	74.5408	1.00562	0.0727021
14	A14	58	74.7978	0.997669	0.0726447
14	A14	59	75.0547	0.987455	0.0724737
14	A14	60	75.3116	0.976363	0.0721894
14	A14	61	75.5686	0.969968	0.0718479
14	A14	62	75.8255	0.958934	0.0715279
14	A14	63	76.0824	0.94906	0.0712836
14	A14	64	76.3393	0.941757	0.0711041
14	A14	65	76.5963	0.933725	0.0709109
14	A14	66	76.8532	0.922083	0.0706039
14	A14	67	77.1101	0.910704	0.0701284
14	A14	68	77.3671	0.903973	0.0695203
14	A14	69	77.624	0.893805	0.0688856
14	A14	70	77.8809	0.887164	0.0683411
14	A14	71	78.1378	0.879135	0.0679581
14	A14	72	78.3948	0.866647	0.0677534
14	A14	73	78.6517	0.859332	0.0677152
14	A14	74	78.9086	0.85165	0.067828
14	A14	75	79.1655	0.843168	0.0680703
14	A14	76	79.4225	0.833574	0.0683976
14	A14	77	79.6794	0.825575	0.0687359
14	A14	78	79.9363	0.81318	0.0690002
14	A14	79	80.1933	0.808166	0.0691358
14	A14	80	80.4502	0.797942	0.0691709
14	A14	81	80.7071	0.78618	0.0692779
14	A14	82	80.964	0.77952	0.0698571
14	A14	83	81.221	0.769187	0.0716554
14	A14	84	81.4779	0.763356	0.0759346
14	A14	85	81.7348	0.754356	0.0847072
14	A14	86	81.9918	0.74268	0.100949
14	A14	87	82.2487	0.735761	0.128578
14	A14	88	82.5056	0.725039	0.171834
14	A14	89	82.7625	0.709794	0.233785
14	A14	90	83.0195	0.69438	0.314055
14	A14	91	83.2764	0.666097	0.406592
14	A14	92	83.5333	0.618618	0.498872
14	A14	93	83.7902	0.513739	0.573796
14	A14	94	84.0472	0.35675	0.614409
14	A14	95	84.3041	0.19829	0.609794
14	A14	96	84.561	0.0846205	0.559395
14	A14	97	84.818	0.0293385	0.473469
14	A14	98	85.0749	0.0142886	0.36934
14	A14	99	85.3318	0.0117392	0.265394
14	A14	100	85.5887	0.0108967	0.175682
14	A14	101	85.8457	0.0107997	0.10726
14	A14	102	86.1026	0.00944393	0.0606065
14	A14	103	86.3595	0.00936385	0.0319864
14	A14	104	86.6164	0.0100451	0.0161417
14	A14	105	86.8734	0.00973963	0.00822698
14	A14	106	87.1303	0.00831084	0.00467553
14	A14	107	87.3872	0.00831124	0.0032603
14	A14	108	87.6442	0.0084348	0.00277246
14	A14	109	87.9011	0.00737553	0.00263628
14	A14	110	88.158	0.00753594	0.00260916
14	A14	111	88.4149	0.00736861	0.00259652
14	A14	112	88.6719	0.0061868	0.00255866
14	A14	113	88.9288	0.00645152	0.00247518
14	A14	114	89.1857	0.00625056	0.00233872
14	A14	115	89.4427	0.0053747	0.00215787
14	A14	116	89.6996	0.0053657	0.00195766
14	A14	117	89.9565	0.00532019	0.00177218
14	A14	118	90.2134	0.00577785	0.0016306
14	A14	119	90.4704	0.00481379	0.00154374
14	A14	120	90.7273	0.0046983	0.00149974
14	A14	121	90.9842	0.0048661	0.00147195
14	A14	122	91.2411	0.00426244	0.00143371
14	A14	123	91.4981	0.00402883	0.00137067
14	A14	124	91.755	0.00428169	0.00128493
14	A14	125	92.0119	0.00389584	0.00119143
14	A14	126	92.2689	0.00379067	0.00111134
14	A14	127	92.5258	0.00368394	0.00106523
14	A14	128	92.7827	0.00361109	0.00106589
14	A14	129	93.0396	0.00353708	0.00111045
14	A14	130	93.2966	0.00377131	0.00117506
14	A14	131	93.5535	0.00299272	0.00121881
14	A14	132	93.8104	0.00264578	0.00119962
14	A14	133	94.0674	0.00221727	0.00109504
14	A14	134	94.3243	0.00294663	0.000914591
14	A14	135	94.5812	0.00248372	0.000694538
14	A14	136	94.8381	0.00257861	0.000479101
15	A15	1	60.1529	1.59383	0.0702292
15	A15	2	60.4098	1.59051	0.0699142
15	A15	3	60.6668	1.58099	0.0694243
15	A15	4	60.9237	1.5729	0.0687931
15	A15	5	61.1806	1.56356	0.068157
15	A15	6	61.4375	1.55317	0.0677117
15	A15	7	61.6945	1.54732	0.0676256
15	A15	8	61.9514	1.53975	0.0679556
15	A15	9	62.2083	1.53168	0.0686374
15	A15	10	62.4652	1.52253	0.0695527
15	A15	11	62.7222	1.50919	0.0706203
15	A15	12	62.9791	1.50132	0.0718213
15	A15	13	63.236	1.49521	0.0731414
15	A15	14	63.493	1.48769	0.0744942
15	A15	15	63.7499	1.47423	0.0757181
15	A15	16	64.0068	1.46553	0.0766646
15	A15	17	64.2637	1.45073	0.0773025
15	A15	18	64.5207	1.44368	0.0777435
15	A15	19	64.7776	1.43659	0.0781609
15	A15	20	65.0345	1.42371	0.0786641
15	A15	21	65.2915	1.41613	0.0792358
15	A15	22	65.5484	1.40369	0.079758
15	A15	23	65.8053	1.39372	0.0801061
15	A15	24	66.0622	1.38257	0.0802346
15	A15	25	66.3192	1.37225	0.0801972
15	A15	26	66.5761	1.36059	0.0800994
15	A15	27	66.833	1.35309	0.0800193
15	A15	28	67.09	1.34277	0.0799521
15	A15	29	67.3469	1.33043	0.0798275
15	A15	30	67.6038	1.32207	0.0795783
15	A15	31	67.8607	1.30728	0.0792166
15	A15	32	68.1177	1.30102	0.0788559
15	A15	33	68.3746	1.29	0.0786556
15	A15	34	68.6315	1.27799	0.0787153
15	A15	35	68.8884	1.27258	0.0789959
15	A15	36	69.1454	1.26235	0.079328
15	A15	37	69.4023	1.24786	0.0795097
15	A15	38	69.6592	1.23701	0.0794256
15	A15	39	69.9162	1.22673	0.0791105
15	A15	40	70.1731	1.21894	0.0787108
15	A15	41	70.43	1.21045	0.0783842
15	A15	42	70.6869	1.19617	0.0782092
15	A15	43	70.9439	1.18806	0.0781523
15	A15	44	71.2008	1.17937	0.0780996
15	A15	45	71.4577	1.16875	0.0779269
15	A15	46	71.7146	1.15818	0.0775741
15	A15	47	71.9716	1.14431	0.0770817
15	A15	48	72.2285	1.13649	0.0765712
15	A15	49	72.4854	1.13333	0.0761734
15	A15	50	72.7424	1.11424	0.0759608
15	A15	51	72.9993	1.112	0.0759241
15	A15	52	73.2562	1.09675	0.0759998
15	A15	53	73.5131	1.08884	0.0761175
15	A15	54	73.7701	1.08017	0.0762215
15	A15	55	74.027	1.06783	0.0762672
15	A15	56	74.2839	1.06047	0.0762061
15	A15	57	74.5408	1.04701	0.0759918
15	A15	58	74.7978	1.04201	0.0756035
15	A15	59	75.0547	1.02807	0.0750776
15	A15	60	75.3116	1.01699	0.0745076
15	A15	61	75.5686	1.01137	0.0740009
15	A15	62	75.8255	1.0015	0.0736176
15	A15	63	76.0824	0.993578	0.0733413
15	A15	64	76.3393	0.981299	0.0731071
15	A15	65	76.5963	0.969377	0.0728675
15	A15	66	76.8532	0.964442	0.0726326
15	A15	67	77.1101	0.953097	0.0724493
15	A15	68	77.3671	0.944276	0.0723424
15	A15	69	77.624	0.936342	0.0722754
15	A15	70	77.8809	0.924703	0.0721754
15	A15	71	78.1378	0.916691	0.0719986
15	A15	72	78.3948	0.90313	0.0717814
15	A15	73	78.6517	0.898418	0.0716285
15	A15	74	78.9086	0.890307	0.0716438
15	A15	75	79.1655	0.878507	0.071857
15	A15	76	79.4225	0.870889	0.0721911
15	A15	77	79.6794	0.860143	0.0724896
15	A15	78	79.9363	0.849508	0.0725805
15	A15	79	80.1933	0.844634	0.0723586
15	A15	80	80.4502	0.830154	0.0718632
15	A15	81	80.7071	0.818359	0.0713491
15	A15	82	80.964	0.81504	0.0713441
15	A15	83	81.221	0.80448	0.072711
15	A15	84	81.4779	0.796715	0.0767734
15	A15	85	81.7348	0.788258	0.0855285
15	A15	86	81.9918	0.77777	0.101895
15	A15	87	82.2487	0.76979	0.129744
15	A15	88	82.5056	0.758483	0.173355
15	A15	89	82.7625	0.744183	0.235977
15	A15	90	83.0195	0.726979	0.317564
15	A15	91	83.2764	0.699514	0.412459
15	A15	92	83.5333	0.651222	0.508379
15	A15	93	83.7902	0.55181	0.588073
15	A15	94	84.0472	0.39443	0.63389
15	A15	95	84.3041	0.228964	0.633804
15	A15	96	84.561	0.106001	0.58612
15	A15	97	84.818	0.0428403	0.500388
15	A15	98	85.0749	0.0247539	0.39396
15	A15	99	85.3318	0.0218219	0.285923
15	A15	100	85.5887	0.0198215	0.191366
15	A15	101	85.8457	0.0191643	0.118308
15	A15	102	86.1026	0.019397	0.0678301
15	A15	103	86.3595	0.0178505	0.0363856
15	A15	104	86.6164	0.0179034	0.0186154
15	A15	105	86.8734	0.0176117	0.0094596
15	A15	106	87.1303	0.0170407	0.00515253
15	A15	107	87.3872	0.0178684	0.00332809
15	A15	108	87.6442	0.0163348	0.00268454
15	A15	109	87.9011	0.0168114	0.00257219
15	A15	110	88.158	0.0157435	0.00268057
15	A15	111	88.4149	0.0163768	0.00285592
15	A15	112	88.6719	0.0148836	0.00301363
15	A15	113	88.9288	0.0149673	0.00310371
15	A15	114	89.1857	0.0139271	0.0031001
15	A15	115	89.4427	0.0141805	0.00299775
15	A15	116	89.6996	0.0134851	0.00280921
15	A15	117	89.9565	0.0132764	0.00255976
15	A15	118	90.2134	0.0128503	0.00228249
15	A15	119	90.4704	0.0125122	0.00201427
15	A15	120	90.7273	0.0130767	0.00179049
15	A15	121	90.9842	0.0123153	0.00163754
15	A15	122	91.2411	0.012616	0.00156559
15	A15	123	91.4981	0.0117204	0.00156588
15	A15	124	91.755	0.012372	0.00161458
15	A15	125	92.0119	0.0116717	0.00168135
15	A15	126	92.2689	0.0112483	0.00173842
15	A15	127	92.5258	0.0110697	0.00176661
15	A15	128	92.7827	0.0110462	0.00175625
15	A15	129	93.0396	0.0109546	0.0017038
15	A15	130	93.2966	0.0102139	0.00160772
15	A15	131	93.5535	0.0102374	0.00146724
15	A15	132	93.8104	0.0102458	0.00128493
15	A15	133	94.0674	0.00984035	0.00106987
15	A15	134	94.3243	0.00993624	0.000838193
15	A15	135	94.5812	0.00999296	0.000610136
15	A15	136	94.8381	0.009684	0.000405352
16	A16	1	60.1529	1.62613	0.0727989
16	A16	2	60.4098	1.61799	0.0726351
16	A16	3	60.6668	1.61242	0.0726354
16	A16	4	60.9237	1.60393	0.07279
16	A16	5	61.1806	1.5959	0.0730227
16	A16	6	61.4375	1.58436	0.0732282
16	A16	7	61.6945	1.57492	0.0733377
16	A16	8	61.9514	1.56245	0.0733627
16	A16	9	62.2083	1.55737	0.0733825
16	A16	10	62.4652	1.54741	0.0734861
16	A16	11	62.7222	1.53815	0.0737357
16	A16	12	62.9791	1.52807	0.0741633
16	A16	13	63.236	1.51663	0.0747915
16	A16	14	63.493	1.50823	0.0756234
16	A16	15	63.7499	1.50078	0.0766057
16	A16	16	64.0068	1.49041	0.0776029
16	A16	17	64.2637	1.48093	0.07844
16	A16	18	64.5207	1.46633	0.079002
16	A16	19	64.7776	1.45788	0.0793149
16	A16	20	65.0345	1.44709	0.079548
16	A16	21	65.2915	1.43818	0.0799189
16	A16	22	65.5484	1.42827	0.0805696
16	A16	23	65.8053	1.42032	0.0814927
16	A16	24	66.0622	1.40579	0.0825369
16	A16	25	66.3192	1.39583	0.0834761
16	A16	26	66.5761	1.3862	0.0840945
16	A16	27	66.833	1.37464	0.0842552
16	A16	28	67.09	1.36123	0.0839392
16	A16	29	67.3469	1.35062	0.0832427
16	A16	30	67.6038	1.34039	0.0823315
16	A16	31	67.8607	1.33076	0.081373
16	A16	32	68.1177	1.31921	0.0804769
16	A16	33	68.3746	1.31214	0.0796889
16	A16	34	68.6315	1.29703	0.0790432
16	A16	35	68.8884	1.29009	0.0786146
16	A16	36	69.1454	1.27685	0.0785232
16	A16	37	69.4023	1.2699	0.0788654
16	A16	38	69.6592	1.26045	0.079607
16	A16	39	69.9162	1.25065	0.0805345
16	A16	40	70.1731	1.24	0.0813259
16	A16	41	70.43	1.2287	0.0817061
16	A16	42	70.6869	1.2117	0.0815904
16	A16	43	70.9439	1.20409	0.0811082
16	A16	44	71.2008	1.1974	0.0804917
16	A16	45	71.4577	1.18837	0.0799302
16	A16	46	71.7146	1.17594	0.0794884
16	A16	47	71.9716	1.15994	0.0791329
16	A16	48	72.2285	1.15725	0.0788065
16	A16	49	72.4854	1.14582	0.0784805
16	A16	50	72.7424	1.13399	0.0781668
16	A16	51	72.9993	1.12372	0.0778983
16	A16	52	73.2562	1.11328	0.0777079
16	A16	53	73.5131	1.10554	0.0776033
16	A16	54	73.7701	1.09455	0.0775548
16	A16	55	74.027	1.08554	0.0775031
16	A16	56	74.2839	1.07268	0.0773872
16	A16	57	74.5408	1.0615	0.0771661
16	A16	58	74.7978	1.05605	0.0768186
16	A16	59	75.0547	1.04656	0.0763344
16	A16	60	75.3116	1.02973	0.0757205
16	A16	61	75.5686	1.02755	0.075035
16	A16	62	75.8255	1.01169	0.0744034
16	A16	63	76.0824	1.00462	0.0739821
16	A16	64	76.3393	0.997147	0.0738726
16	A16	65	76.5963	0.989146	0.0740473
16	A16	66	76.8532	0.975678	0.0743478
16	A16	67	77.1101	0.968639	0.0745695
16	A16	68	77.3671	0.95459	0.0745727
16	A16	69	77.624	0.946129	0.0743406
16	A16	70	77.8809	0.939019	0.0739556
16	A16	71	78.1378	0.927965	0.073521
16	A16	72	78.3948	0.919193	0.0731048
16	A16	73	78.6517	0.909816	0.0727422
16	A16	74	78.9086	0.89926	0.0724707
16	A16	75	79.1655	0.887855	0.0723442
16	A16	76	79.4225	0.883212	0.0723966
16	A16	77	79.6794	0.874891	0.072595
16	A16	78	79.9363	0.863953	0.0728415
16	A16	79	80.1933	0.848856	0.0730489
16	A16	80	80.4502	0.845043	0.0732436
16	A16	81	80.7071	0.831613	0.0736282
16	A16	82	80.964	0.826926	0.0746093
16	A16	83	81.221	0.816335	0.0768593
16	A16	84	81.4779	0.805053	0.0815101
16	A16	85	81.7348	0.795898	0.0904779
16	A16	86	81.9918	0.78656	0.106786
16	A16	87	82.2487	0.775103	0.134585
16	A16	88	82.5056	0.766691	0.17851
16	A16	89	82.7625	0.751045	0.242082
16	A16	90	83.0195	0.734643	0.325308
16	A16	91	83.2764	0.704835	0.422272
16	A16	92	83.5333	0.658959	0.520155
16	A16	93	83.7902	0.553453	0.601054
16	A16	94	84.0472	0.390893	0.646803
16	A16	95	84.3041	0.220671	0.645229
16	A16	96	84.561	0.0982243	0.594933
16	A16	97	84.818	0.0362898	0.506087
16	A16	98	85.0749	0.0193734	0.396727
16	A16	99	85.3318	0.0160403	0.286446
16	A16	100	85.5887	0.0154657	0.190532
16	A16	101	85.8457	0.0152531	0.116922
16	A16	102	86.1026	0.0149495	0.0664556
16	A16	103	86.3595	0.0140168	0.0353142
16	A16	104	86.6164	0.0134229	0.0179255
16	A16	105	86.8734	0.013075	0.00910554
16	A16	106	87.1303	0.0133576	0.00504038
16	A16	107	87.3872	0.0127265	0.00335888
16	A16	108	87.6442	0.012618	0.00276787
16	A16	109	87.9011	0.0124272	0.00262492
16	A16	110	88.158	0.0112852	0.00262726
16	A16	111	88.4149	0.011266	0.00263851
16	A16	112	88.6719	0.0109246	0.00260619
16	A16	113	88.9288	0.0109406	0.00252075
16	A16	114	89.1857	0.01041	0.00239142
16	A16	115	89.4427	0.00979307	0.00223358
16	A16	116	89.6996	0.00944548	0.00206521
16	A16	117	89.9565	0.0100518	0.00190624
16	A16	118	90.2134	0.00968599	0.00177459
16	A16	119	90.4704	0.00893731	0.00167963
16	A16	120	90.7273	0.0088676	0.0016181
16	A16	121	90.9842	0.00916526	0.001576
16	A16	122	91.2411	0.00873687	0.00153523
16	A16	123	91.4981	0.00824763	0.00148235
16	A16	124	91.755	0.00806718	0.00141637
16	A16	125	92.0119	0.0078593	0.0013516
16	A16	126	92.2689	0.00834609	0.00131161
16	A16	127	92.5258	0.0080736	0.00131588
16	A16	128	92.7827	0.0075833	0.00136714
16	A16	129	93.0396	0.00703889	0.00144738
16	A16	130	93.2966	0.00787252	0.00152372
16	A16	131	93.5535	0.00670248	0.00155892
16	A16	132	93.8104	0.00674101	0.00152152
16	A16	133	94.0674	0.00648074	0.00139453
16	A16	134	94.3243	0.00623571	0.00118212
16	A16	135	94.5812	0.00597202	0.000911553
16	A16	136	94.8381	0.00637403	0.000626325
17	A17	1	60.1529	1.61444	0.0732932
17	A17	2	60.4098	1.60484	0.0738327
17	A17	3	60.6668	1.59276	0.07419
17	A17	4	60.9237	1.58693	0.074226
17	A17	5	61.1806	1.57625	0.0739534
17	A17	6	61.4375	1.56741	0.0735232
17	A17	7	61.6945	1.55504	0.0731395
17	A17	8	61.9514	1.54844	0.0729551
17	A17	9	62.2083	1.5436	0.0730046
17	A17	10	62.4652	1.53152	0.0732141
17	A17	11	62.7222	1.51687	0.0734707
17	A17	12	62.9791	1.51401	0.0736981
17	A17	13	63.236	1.50144	0.0738831
17	A17	14	63.493	1.49271	0.0740606
17	A17	15	63.7499	1.48456	0.0742684
17	A17	16	64.0068	1.47325	0.0745342
17	A17	17	64.2637	1.46467	0.0748741
17	A17	18	64.5207	1.45495	0.0753072
17	A17	19	64.7776	1.44567	0.0758627
17	A17	20	65.0345	1.43732	0.0765771
17	A17	21	65.2915	1.42394	0.0774834
17	A17	22	65.5484	1.41897	0.0785874
17	A17	23	65.8053	1.40523	0.0798267
17	A17	24	66.0622	1.3966	0.0810343
17	A17	25	66.3192	1.38696	0.0819539
17	A17	26	66.5761	1.37575	0.0823287
17	A17	27	66.833	1.36575	0.0820471
17	A17	28	67.09	1.34834	0.0812495
17	A17	29	67.3469	1.33578	0.0802974
17	A17	30	67.6038	1.33927	0.0796046
17	A17	31	67.8607	1.32407	0.0794247
17	A17	32	68.1177	1.31244	0.0797452
17	A17	33	68.3746	1.30363	0.0803398
17	A17	34	68.6315	1.29178	0.0809225
17	A17	35	68.8884	1.28228	0.0812905
17	A17	36	69.1454	1.27095	0.0813861
17	A17	37	69.4023	1.26042	0.081271
17	A17	38	69.6592	1.24864	0.0810485
17	A17	39	69.9162	1.24021	0.0807857
17	A17	40	70.1731	1.23344	0.0804817
17	A17	41	70.43	1.21847	0.080086
17	A17	42	70.6869	1.20602	0.0795622
17	A17	43	70.9439	1.20044	0.0789297
17	A17	44	71.2008	1.18884	0.0782604
17	A17	45	71.4577	1.17997	0.0776423
17	A17	46	71.7146	1.16831	0.0771366
17	A17	47	71.9716	1.16013	0.0767631
17	A17	48	72.2285	1.15023	0.076509
17	A17	49	72.4854	1.14092	0.0763498
17	A17	50	72.7424	1.12981	0.0762643
17	A17	51	72.9993	1.12034	0.0762371
17	A17	52	73.2562	1.11184	0.0762597
17	A17	53	73.5131	1.10149	0.0763191
17	A17	54	73.7701	1.09102	0.076396
17	A17	55	74.027	1.08215	0.0764644
17	A17	56	74.2839	1.07061	0.0764946
17	A17	57	74.5408	1.06317	0.0764505
17	A17	58	74.7978	1.0525	0.0762954
17	A17	59	75.0547	1.04124	0.0760042
17	A17	60	75.3116	1.0335	0.07558
17	A17	61	75.5686	1.02141	0.0750605
17	A17	62	75.8255	1.0137	0.0744984
17	A17	63	76.0824	1.0052	0.0739347
17	A17	64	76.3393	0.993121	0.0733827
17	A17	65	76.5963	0.987286	0.072842
17	A17	66	76.8532	0.974396	0.0723346
17	A17	67	77.1101	0.966166	0.0719239
17	A17	68	77.3671	0.955992	0.0716871
17	A17	69	77.624	0.95099	0.0716612
17	A17	70	77.8809	0.940325	0.0717973
17	A17	71	78.1378	0.930285	0.0719798
17	A17	72	78.3948	0.920176	0.0720983
17	A17	73	78.6517	0.910106	0.0721208
17	A17	74	78.9086	0.902973	0.0721058
17	A17	75	79.1655	0.893233	0.0721479
17	A17	76	79.4225	0.884744	0.0722986
17	A17	77	79.6794	0.876153	0.0725295
17	A17	78	79.9363	0.86519	0.0727579
17	A17	79	80.1933	0.854894	0.0729164
17	A17	80	80.4502	0.846877	0.0730202
17	A17	81	80.7071	0.836994	0.0732177
17	A17	82	80.964	0.828443	0.0738547
17	A17	83	81.221	0.819332	0.0756089
17	A17	84	81.4779	0.808439	0.0797262
17	A17	85	81.7348	0.799035	0.0883289
17	A17	86	81.9918	0.793231	0.104657
17	A17	87	82.2487	0.782097	0.132994
17	A17	88	82.5056	0.771247	0.177931
17	A17	89	82.7625	0.757992	0.242728
17	A17	90	83.0195	0.743014	0.326922
17	A17	91	83.2764	0.715217	0.424043
17	A17	92	83.5333	0.659955	0.520865
17	A17	93	83.7902	0.555897	0.599468
17	A17	94	84.0472	0.394695	0.642172
17	A17	95	84.3041	0.23304	0.637641
17	A17	96	84.561	0.115237	0.58533
17	A17	97	84.818	0.0581297	0.495912
17	A17	98	85.0749	0.0419599	0.387399
17	A17	99	85.3318	0.0391722	0.278925
17	A17	100	85.5887	0.0378625	0.185146
17	A17	101	85.8457	0.0371166	0.113468
17	A17	102	86.1026	0.0369477	0.0644573
17	A17	103	86.3595	0.0365133	0.0342689
17	A17	104	86.6164	0.0359982	0.0174507
17	A17	105	86.8734	0.0360005	0.00896452
17	A17	106	87.1303	0.0355971	0.00509854
17	A17	107	87.3872	0.0349436	0.0035323
17	A17	108	87.6442	0.0346954	0.00299766
17	A17	109	87.9011	0.0344252	0.00287511
17	A17	110	88.158	0.0342634	0.00288533
17	A17	111	88.4149	0.0336312	0.00290616
17	A17	112	88.6719	0.0328409	0.00288611
17	A17	113	88.9288	0.0327202	0.00281268
17	A17	114	89.1857	0.0322943	0.00269979
17	A17	115	89.4427	0.0325669	0.00257417
17	A17	116	89.6996	0.0320271	0.00245843
17	A17	117	89.9565	0.0315323	0.00236025
17	A17	118	90.2134	0.0309502	0.00227424
17	A17	119	90.4704	0.0312176	0.00219235
17	A17	120	90.7273	0.0310307	0.00211247
17	A17	121	90.9842	0.0303023	0.00203848
17	A17	122	91.2411	0.0301882	0.00197391
17	A17	123	91.4981	0.0304762	0.00191618
17	A17	124	91.755	0.029821	0.00185592
17	A17	125	92.0119	0.0290714	0.00178172
17	A17	126	92.2689	0.0297277	0.00168722
17	A17	127	92.5258	0.0292745	0.00157674
17	A17	128	92.7827	0.0286944	0.00146634
17	A17	129	93.0396	0.0287544	0.00137838
17	A17	130	93.2966	0.0291177	0.00132989
17	A17	131	93.5535	0.0287035	0.00131944
17	A17	132	93.8104	0.028547	0.00132068
17	A17	133	94.0674	0.0280067	0.00129007
17	A17	134	94.3243	0.0279009	0.00118756
17	A17	135	94.5812	0.0276728	0.00099915
17	A17	136	94.8381	0.0274183	0.000746593
18	A18	1	60.1529	1.7212	0.0774374
18	A18	2	60.4098	1.71002	0.0775493
18	A18	3	60.6668	1.6995	0.0773681
18	A18	4	60.9237	1.69386	0.0768443
18	A18	5	61.1806	1.68327	0.0760851
18	A18	6	61.4375	1.67172	0.0753321
18	A18	7	61.6945	1.66433	0.0748717
18	A18	8	61.9514	1.65368	0.0749149
18	A18	9	62.2083	1.64931	0.0755036
18	A18	10	62.4652	1.64009	0.0764895
18	A18	11	62.7222	1.62595	0.0776139
18	A18	12	62.9791	1.6186	0.0786329
18	A18	13	63.236	1.60687	0.0794268
18	A18	14	63.493	1.59864	0.0800201
18	A18	15	63.7499	1.58504	0.0805224
18	A18	16	64.0068	1.58024	0.0810334
18	A18	17	64.2637	1.56834	0.0815922
18	A18	18	64.5207	1.55803	0.0821869
18	A18	19	64.7776	1.54627	0.0828153
18	A18	20	65.0345	1.53752	0.0835182
18	A18	21	65.2915	1.52438	0.0843626
18	A18	22	65.5484	1.51913	0.0853774
18	A18	23	65.8053	1.50745	0.0864929
18	A18	24	66.0622	1.49185	0.0875356
18	A18	25	66.3192	1.48557	0.0882838
18	A18	26	66.5761	1.4741	0.0885676
18	A18	27	66.833	1.45789	0.0883532
18	A18	28	67.09	1.44855	0.087773
18	A18	29	67.3469	1.43784	0.0870877
18	A18	30	67.6038	1.42946	0.0865775
18	A18	31	67.8607	1.41598	0.0864324
18	A18	32	68.1177	1.40699	0.0866776
18	A18	33	68.3746	1.39988	0.0871755
18	A18	34	68.6315	1.38198	0.0876831
18	A18	35	68.8884	1.37469	0.0879513
18	A18	36	69.1454	1.36428	0.0878221
18	A18	37	69.4023	1.34871	0.0872918
18	A18	38	69.6592	1.34037	0.0865179
18	A18	39	69.9162	1.32877	0.0857539
18	A18	40	70.1731	1.31676	0.0852328
18	A18	41	70.43	1.31354	0.0850657
18	A18	42	70.6869	1.29958	0.0852057
18	A18	43	70.9439	1.28501	0.0855012
18	A18	44	71.2008	1.27768	0.0857825
18	A18	45	71.4577	1.26612	0.085929
18	A18	46	71.7146	1.25601	0.0858812
18	A18	47	71.9716	1.24576	0.085632
18	A18	48	72.2285	1.23267	0.085228
18	A18	49	72.4854	1.2232	0.0847756
18	A18	50	72.7424	1.21159	0.0844235
18	A18	51	72.9993	1.20242	0.0843018
18	A18	52	73.2562	1.19375	0.084447
18	A18	53	73.5131	1.18273	0.0847663
18	A18	54	73.7701	1.16927	0.0850699
18	A18	55	74.027	1.16059	0.0851619
18	A18	56	74.2839	1.15002	0.0849354
18	A18	57	74.5408	1.13566	0.0844237
18	A18	58	74.7978	1.12648	0.0837842
18	A18	59	75.0547	1.12	0.083221
18	A18	60	75.3116	1.10541	0.0828841
18	A18	61	75.5686	1.09764	0.0827959
18	A18	62	75.8255	1.0884	0.0828406
18	A18	63	76.0824	1.07738	0.0828328
18	A18	64	76.3393	1.06489	0.082635
18	A18	65	76.5963	1.05375	0.0822583
18	A18	66	76.8532	1.04404	0.081885
18	A18	67	77.1101	1.03487	0.0817854
18	A18	68	77.3671	1.02604	0.0821757
18	A18	69	77.624	1.01668	0.0830869
18	A18	70	77.8809	1.00387	0.0843182
18	A18	71	78.1378	0.995226	0.0854937
18	A18	72	78.3948	0.983329	0.0861962
18	A18	73	78.6517	0.971156	0.0861241
18	A18	74	78.9086	0.958336	0.08521
18	A18	75	79.1655	0.946073	0.0836434
18	A18	76	79.4225	0.940193	0.0817946
18	A18	77	79.6794	0.929967	0.080084
18	A18	78	79.9363	0.92075	0.0788756
18	A18	79	80.1933	0.907879	0.0784438
18	A18	80	80.4502	0.901913	0.0790051
18	A18	81	80.7071	0.892579	0.08077
18	A18	82	80.964	0.880741	0.0839982
18	A18	83	81.221	0.8735	0.089102
18	A18	84	81.4779	0.861746	0.0968725
18	A18	85	81.7348	0.849565	0.108867
18	A18	86	81.9918	0.837294	0.127847
18	A18	87	82.2487	0.819757	0.157939
18	A18	88	82.5056	0.80697	0.204045
18	A18	89	82.7625	0.792931	0.270118
18	A18	90	83.0195	0.773473	0.356442
18	A18	91	83.2764	0.748696	0.456891
18	A18	92	83.5333	0.691518	0.557856
18	A18	93	83.7902	0.584994	0.640293
18	A18	94	84.0472	0.417406	0.685059
18	A18	95	84.3041	0.242796	0.679654
18	A18	96	84.561	0.120371	0.623219
18	A18	97	84.818	0.0623994	0.527124
18	A18	98	85.0749	0.0480417	0.410781
18	A18	99	85.3318	0.0457787	0.294826
18	A18	100	85.5887	0.0444038	0.194991
18	A18	101	85.8457	0.0440593	0.119088
18	A18	102	86.1026	0.0433529	0.0675122
18	A18	103	86.3595	0.0429013	0.035945
18	A18	104	86.6164	0.0421541	0.0184382
18	A18	105	86.8734	0.0414281	0.00959913
18	A18	106	87.1303	0.041668	0.00553583
18	A18	107	87.3872	0.0415302	0.00387071
18	A18	108	87.6442	0.0409894	0.00332665
18	A18	109	87.9011	0.0404212	0.0032717
18	A18	110	88.158	0.0399901	0.00339616
18	A18	111	88.4149	0.0394395	0.00353835
18	A18	112	88.6719	0.0389498	0.00361009
18	A18	113	88.9288	0.0385212	0.00357068
18	A18	114	89.1857	0.0378072	0.00341919
18	A18	115	89.4427	0.0372467	0.00319026
18	A18	116	89.6996	0.0373218	0.00294313
18	A18	117	89.9565	0.0373263	0.00273936
18	A18	118	90.2134	0.0369379	0.00261428
18	A18	119	90.4704	0.036772	0.00255784
18	A18	120	90.7273	0.0362294	0.00252052
18	A18	121	90.9842	0.0354238	0.00244494
18	A18	122	91.2411	0.0348976	0.00230397
18	A18	123	91.4981	0.0351191	0.00211914
18	A18	124	91.755	0.035734	0.00194612
18	A18	125	92.0119	0.0351687	0.00183893
18	A18	126	92.2689	0.0343529	0.00182033
18	A18	127	92.5258	0.0345863	0.00187761
18	A18	128	92.7827	0.0343052	0.0019807
18	A18	129	93.0396	0.0338961	0.00210288
18	A18	130	93.2966	0.0333514	0.00222658
18	A18	131	93.5535	0.0339161	0.00233282
18	A18	132	93.8104	0.0332479	0.00238801
18	A18	133	94.0674	0.0322384	0.00234442
18	A18	134	94.3243	0.0321516	0.00215962
18	A18	135	94.5812	0.0321705	0.00182406
18	A18	136	94.8381	0.0308135	0.00137715
19	A19	1	60.1529	1.58275	0.0690074
19	A19	2	60.4098	1.57777	0.0690289
19	A19	3	60.6668	1.57007	0.0690115
19	A19	4	60.9237	1.5592	0.068895
19	A19	5	61.1806	1.55388	0.0686653
19	A19	6	61.4375	1.54357	0.0683797
19	A19	7	61.6945	1.53279	0.0681542
19	A19	8	61.9514	1.52446	0.0681254
19	A19	9	62.2083	1.51968	0.0683865
19	A19	10	62.4652	1.51064	0.0689456
19	A19	11	62.7222	1.49881	0.0697228
19	A19	12	62.9791	1.49151	0.0705998
19	A19	13	63.236	1.48314	0.0714834
19	A19	14	63.493	1.47221	0.0723448
19	A19	15	63.7499	1.46289	0.0732099
19	A19	16	64.0068	1.45427	0.0741146
19	A19	17	64.2637	1.44458	0.0750501
19	A19	18	64.5207	1.43836	0.0759359
19	A19	19	64.7776	1.42203	0.0766387
19	A19	20	65.0345	1.4174	0.0770309
19	A19	21	65.2915	1.40434	0.0770457
19	A19	22	65.5484	1.39331	0.0767106
19	A19	23	65.8053	1.38694	0.0761393
19	A19	24	66.0622	1.37374	0.0754952
19	A19	25	66.3192	1.36454	0.0749422
19	A19	26	66.5761	1.35845	0.0746027
19	A19	27	66.833	1.34528	0.0745389
19	A19	28	67.09	1.339	0.0747597
19	A19	29	67.3469	1.32617	0.0752403
19	A19	30	67.6038	1.31944	0.0759368
19	A19	31	67.8607	1.30832	0.0767759
19	A19	32	68.1177	1.29706	0.0776385
19	A19	33	68.3746	1.29141	0.0783621
19	A19	34	68.6315	1.27863	0.0787875
19	A19	35	68.8884	1.26585	0.0788353
19	A19	36	69.1454	1.25579	0.0785506
19	A19	37	69.4023	1.2463	0.0780771
19	A19	38	69.6592	1.23725	0.0775693
19	A19	39	69.9162	1.22956	0.0771076
19	A19	40	70.1731	1.2188	0.0766878
19	A19	41	70.43	1.20368	0.0762731
19	A19	42	70.6869	1.19819	0.0758547
19	A19	43	70.9439	1.18923	0.0754641
19	A19	44	71.2008	1.17791	0.0751374
19	A19	45	71.4577	1.17031	0.0748825
19	A19	46	71.7146	1.15968	0.0746826
19	A19	47	71.9716	1.14789	0.0745282
19	A19	48	72.2285	1.14089	0.0744361
19	A19	49	72.4854	1.13213	0.0744368
19	A19	50	72.7424	1.11998	0.0745411
19	A19	51	72.9993	1.11273	0.0747156
19	A19	52	73.2562	1.10276	0.0748967
19	A19	53	73.5131	1.09203	0.0750211
19	A19	54	73.7701	1.08204	0.075061
19	A19	55	74.027	1.0716	0.075028
19	A19	56	74.2839	1.06471	0.074952
19	A19	57	74.5408	1.0535	0.0748507
19	A19	58	74.7978	1.04455	0.0747186
19	A19	59	75.0547	1.03177	0.0745329
19	A19	60	75.3116	1.02587	0.0742677
19	A19	61	75.5686	1.01708	0.0739054
19	A19	62	75.8255	1.00274	0.0734454
19	A19	63	76.0824	0.997351	0.0729104
19	A19	64	76.3393	0.98679	0.072351
19	A19	65	76.5963	0.975617	0.0718342
19	A19	66	76.8532	0.970804	0.0714289
19	A19	67	77.1101	0.958811	0.0711903
19	A19	68	77.3671	0.948856	0.0711519
19	A19	69	77.624	0.940993	0.0713067
19	A19	70	77.8809	0.933007	0.0715857
19	A19	71	78.1378	0.924034	0.071851
19	A19	72	78.3948	0.912774	0.0719254
19	A19	73	78.6517	0.903002	0.0716669
19	A19	74	78.9086	0.894383	0.0710429
19	A19	75	79.1655	0.883795	0.070163
19	A19	76	79.4225	0.876079	0.0692414
19	A19	77	79.6794	0.867381	0.0685126
19	A19	78	79.9363	0.860835	0.0681498
19	A19	79	80.1933	0.851037	0.068233
19	A19	80	80.4502	0.841127	0.0687798
19	A19	81	80.7071	0.832559	0.0698322
19	A19	82	80.964	0.825459	0.0715854
19	A19	83	81.221	0.81655	0.0745839
19	A19	84	81.4779	0.803963	0.0800052
19	A19	85	81.7348	0.795744	0.0899959
19	A19	86	81.9918	0.786638	0.107915
19	A19	87	82.2487	0.778542	0.138186
19	A19	88	82.5056	0.765151	0.185409
19	A19	89	82.7625	0.752961	0.252516
19	A19	90	83.0195	0.736535	0.338267
19	A19	91	83.2764	0.706991	0.435093
19	A19	92	83.5333	0.647073	0.52876
19	A19	93	83.7902	0.529322	0.60103
19	A19	94	84.0472	0.363817	0.635017
19	A19	95	84.3041	0.20803	0.621228
19	A19	96	84.561	0.103802	0.561383
19	A19	97	84.818	0.0572691	0.467939
19	A19	98	85.0749	0.0477615	0.359527
19	A19	99	85.3318	0.0442148	0.254618
19	A19	100	85.5887	0.0440396	0.166388
19	A19	101	85.8457	0.0426899	0.10063
19	A19	102	86.1026	0.0429867	0.0567225
19	A19	103	86.3595	0.041916	0.0302667
19	A19	104	86.6164	0.0412698	0.015805
19	A19	105	86.8734	0.0404591	0.00860928
19	A19	106	87.1303	0.0406159	0.0053657
19	A19	107	87.3872	0.0405508	0.00408773
19	A19	108	87.6442	0.0400077	0.00371107
19	A19	109	87.9011	0.0391067	0.00369554
19	A19	110	88.158	0.038354	0.00376684
19	A19	111	88.4149	0.0376883	0.00379277
19	A19	112	88.6719	0.0374322	0.00373063
19	A19	113	88.9288	0.0372359	0.00359279
19	A19	114	89.1857	0.0371927	0.00341254
19	A19	115	89.4427	0.0357669	0.0032193
19	A19	116	89.6996	0.0358671	0.00303305
19	A19	117	89.9565	0.0354733	0.00287211
19	A19	118	90.2134	0.0352845	0.00275765
19	A19	119	90.4704	0.035268	0.0027057
19	A19	120	90.7273	0.0349451	0.0027135
19	A19	121	90.9842	0.0343088	0.00275524
19	A19	122	91.2411	0.0331178	0.00279377
19	A19	123	91.4981	0.0339045	0.00279971
19	A19	124	91.755	0.0332826	0.00276336
19	A19	125	92.0119	0.0325227	0.00269329
19	A19	126	92.2689	0.0325533	0.00260641
19	A19	127	92.5258	0.0322034	0.00251851
19	A19	128	92.7827	0.0316099	0.00243916
19	A19	129	93.0396	0.0320485	0.00236902
19	A19	130	93.2966	0.0311139	0.00229854
19	A19	131	93.5535	0.0309963	0.00220856
19	A19	132	93.8104	0.0303783	0.00207475
19	A19	133	94.0674	0.0309569	0.00187578
19	A19	134	94.3243	0.02999	0.00160301
19	A19	135	94.5812	0.0295663	0.00126847
19	A19	136	94.8381	0.0298947	0.00090626
20	A20	1	60.1529	1.73133	0.0789749
20	A20	2	60.4098	1.72579	0.0794044
20	A20	3	60.6668	1.7151	0.0799572
20	A20	4	60.9237	1.70795	0.0804045
20	A20	5	61.1806	1.69801	0.0804795
20	A20	6	61.4375	1.68648	0.0800026
20	A20	7	61.6945	1.67582	0.0790232
20	A20	8	61.9514	1.65996	0.0778708
20	A20	9	62.2083	1.6548	0.077052
20	A20	10	62.4652	1.64995	0.07702
20	A20	11	62.7222	1.64176	0.0779482
20	A20	12	62.9791	1.6277	0.0796467
20	A20	13	63.236	1.61975	0.0816578
20	A20	14	63.493	1.61179	0.0834794
20	A20	15	63.7499	1.59543	0.0847798
20	A20	16	64.0068	1.58373	0.0855094
20	A20	17	64.2637	1.57606	0.0858647
20	A20	18	64.5207	1.56438	0.0861486
20	A20	19	64.7776	1.55417	0.0866041
20	A20	20	65.0345	1.54633	0.0872988
20	A20	21	65.2915	1.53038	0.0881244
20	A20	22	65.5484	1.52526	0.0888609
20	A20	23	65.8053	1.50836	0.0892919
20	A20	24	66.0622	1.49757	0.0892913
20	A20	25	66.3192	1.48866	0.088875
20	A20	26	66.5761	1.47432	0.088205
20	A20	27	66.833	1.46567	0.0875474
20	A20	28	67.09	1.45131	0.0871873
20	A20	29	67.3469	1.44313	0.0873132
20	A20	30	67.6038	1.43672	0.0879158
20	A20	31	67.8607	1.42262	0.088765
20	A20	32	68.1177	1.40977	0.0894904
20	A20	33	68.3746	1.39871	0.0897379
20	A20	34	68.6315	1.38917	0.0893237
20	A20	35	68.8884	1.37083	0.0883054
20	A20	36	69.1454	1.36536	0.0869396
20	A20	37	69.4023	1.35053	0.0855637
20	A20	38	69.6592	1.34918	0.0844673
20	A20	39	69.9162	1.32937	0.0838205
20	A20	40	70.1731	1.32256	0.0836682
20	A20	41	70.43	1.31423	0.0839667
20	A20	42	70.6869	1.30168	0.0846156
20	A20	43	70.9439	1.29296	0.0854675
20	A20	44	71.2008	1.27881	0.0863237
20	A20	45	71.4577	1.27095	0.0869403
20	A20	46	71.7146	1.26085	0.0870809
20	A20	47	71.9716	1.24654	0.0865976
20	A20	48	72.2285	1.23402	0.0855291
20	A20	49	72.4854	1.22411	0.0841308
20	A20	50	72.7424	1.21423	0.082806
20	A20	51	72.9993	1.20417	0.081943
20	A20	52	73.2562	1.19762	0.0817471
20	A20	53	73.5131	1.18695	0.082159
20	A20	54	73.7701	1.17331	0.082895
20	A20	55	74.027	1.16656	0.0835873
20	A20	56	74.2839	1.15232	0.0839341
20	A20	57	74.5408	1.14035	0.0837974
20	A20	58	74.7978	1.13225	0.0832199
20	A20	59	75.0547	1.12239	0.0823849
20	A20	60	75.3116	1.10889	0.0815379
20	A20	61	75.5686	1.10043	0.0809079
20	A20	62	75.8255	1.09233	0.0806266
20	A20	63	76.0824	1.08234	0.0806814
20	A20	64	76.3393	1.07245	0.0809157
20	A20	65	76.5963	1.05947	0.0811041
20	A20	66	76.8532	1.05174	0.081063
20	A20	67	77.1101	1.03838	0.0807466
20	A20	68	77.3671	1.0287	0.0802649
20	A20	69	77.624	1.01857	0.0798038
20	A20	70	77.8809	1.01085	0.0794965
20	A20	71	78.1378	1.00219	0.0793259
20	A20	72	78.3948	0.992042	0.079136
20	A20	73	78.6517	0.976751	0.0787445
20	A20	74	78.9086	0.968958	0.0780744
20	A20	75	79.1655	0.958764	0.0772072
20	A20	76	79.4225	0.952379	0.0763317
20	A20	77	79.6794	0.94156	0.0756438
20	A20	78	79.9363	0.931704	0.0752763
20	A20	79	80.1933	0.922241	0.0753005
20	A20	80	80.4502	0.912991	0.0757694
20	A20	81	80.7071	0.904366	0.0767779
20	A20	82	80.964	0.894907	0.0785517
20	A20	83	81.221	0.885453	0.0816324
20	A20	84	81.4779	0.874274	0.087201
20	A20	85	81.7348	0.863856	0.0974963
20	A20	86	81.9918	0.8525	0.116135
20	A20	87	82.2487	0.842091	0.147983
20	A20	88	82.5056	0.836626	0.198206
20	A20	89	82.7625	0.818935	0.270251
20	A20	90	83.0195	0.8	0.36311
20	A20	91	83.2764	0.769276	0.468891
20	A20	92	83.5333	0.716655	0.572333
20	A20	93	83.7902	0.586142	0.653532
20	A20	94	84.0472	0.411634	0.693702
20	A20	95	84.3041	0.244764	0.681837
20	A20	96	84.561	0.130148	0.619087
20	A20	97	84.818	0.0775446	0.518516
20	A20	98	85.0749	0.0639815	0.400295
20	A20	99	85.3318	0.0612624	0.2848
20	A20	100	85.5887	0.0608512	0.186863
20	A20	101	85.8457	0.0597547	0.113302
20	A20	102	86.1026	0.0592119	0.0638131
20	A20	103	86.3595	0.059023	0.0337962
20	A20	104	86.6164	0.0579587	0.0173307
20	A20	105	86.8734	0.0578991	0.00917965
20	A20	106	87.1303	0.0583593	0.00559013
20	A20	107	87.3872	0.057376	0.00424758
20	A20	108	87.6442	0.0567571	0.00387932
20	A20	109	87.9011	0.0552483	0.00385133
20	A20	110	88.158	0.0556716	0.00388538
20	A20	111	88.4149	0.055375	0.00388789
20	A20	112	88.6719	0.0550811	0.00384566
20	A20	113	88.9288	0.0537492	0.00376465
20	A20	114	89.1857	0.053412	0.00364407
20	A20	115	89.4427	0.0535035	0.00347794
20	A20	116	89.6996	0.0527123	0.00326703
20	A20	117	89.9565	0.0524469	0.00302627
20	A20	118	90.2134	0.0519559	0.00278233
20	A20	119	90.4704	0.0518772	0.00256474
20	A20	120	90.7273	0.0519691	0.00239661
20	A20	121	90.9842	0.0515886	0.00228894
20	A20	122	91.2411	0.0505592	0.00224091
20	A20	123	91.4981	0.0509572	0.00224392
20	A20	124	91.755	0.0510829	0.00228469
20	A20	125	92.0119	0.0502324	0.00234557
20	A20	126	92.2689	0.0496181	0.00240406
20	A20	127	92.5258	0.0498503	0.00243535
20	A20	128	92.7827	0.0492723	0.00241841
20	A20	129	93.0396	0.0490254	0.00234251
20	A20	130	93.2966	0.0484402	0.00220999
20	A20	131	93.5535	0.0483782	0.00203306
20	A20	132	93.8104	0.0482522	0.00182547
20	A20	133	94.0674	0.0486338	0.00159398
20	A20	134	94.3243	0.0475835	0.00133672
20	A20	135	94.5812	0.0474922	0.00105191
20	A20	136	94.8381	0.047338	0.000750568
21	A21	1	60.1529	1.59028	0.0698623
21	A21	2	60.4098	1.58608	0.0695248
21	A21	3	60.6668	1.58028	0.0693685
21	A21	4	60.9237	1.57187	0.069436
21	A21	5	61.1806	1.56029	0.0697254
21	A21	6	61.4375	1.55342	0.0701964
21	A21	7	61.6945	1.54584	0.0707837
21	A21	8	61.9514	1.53195	0.0714218
21	A21	9	62.2083	1.52678	0.0720527
21	A21	10	62.4652	1.5165	0.072623
21	A21	11	62.7222	1.5054	0.0730847
21	A21	12	62.9791	1.49795	0.0734002
21	A21	13	63.236	1.48685	0.073558
21	A21	14	63.493	1.47779	0.0735982
21	A21	15	63.7499	1.46656	0.0736134
21	A21	16	64.0068	1.45949	0.0737272
21	A21	17	64.2637	1.4477	0.0740487
21	A21	18	64.5207	1.44247	0.0746204
21	A21	19	64.7776	1.4283	0.0753929
21	A21	20	65.0345	1.42191	0.0762359
21	A21	21	65.2915	1.4108	0.07699
21	A21	22	65.5484	1.40052	0.0775312
21	A21	23	65.8053	1.38941	0.0778267
21	A21	24	66.0622	1.3778	0.0779364
21	A21	25	66.3192	1.37053	0.0779754
21	A21	26	66.5761	1.35888	0.0780412
21	A21	27	66.833	1.35054	0.0781674
21	A21	28	67.09	1.33965	0.0783195
21	A21	29	67.3469	1.32645	0.078429
21	A21	30	67.6038	1.32023	0.0784393
21	A21	31	67.8607	1.3075	0.0783254
21	A21	32	68.1177	1.29844	0.0781033
21	A21	33	68.3746	1.28703	0.0778229
21	A21	34	68.6315	1.27708	0.0775599
21	A21	35	68.8884	1.26776	0.077407
21	A21	36	69.1454	1.2589	0.0774516
21	A21	37	69.4023	1.24601	0.0777469
21	A21	38	69.6592	1.23681	0.0782687
21	A21	39	69.9162	1.22929	0.0788877
21	A21	40	70.1731	1.21984	0.0793882
21	A21	41	70.43	1.20497	0.0795506
21	A21	42	70.6869	1.19504	0.0792628
21	A21	43	70.9439	1.18434	0.0785818
21	A21	44	71.2008	1.17303	0.0777081
21	A21	45	71.4577	1.16679	0.0768671
21	A21	46	71.7146	1.15734	0.0761971
21	A21	47	71.9716	1.14428	0.0757057
21	A21	48	72.2285	1.13808	0.0753137
21	A21	49	72.4854	1.12467	0.0749443
21	A21	50	72.7424	1.11501	0.0745707
21	A21	51	72.9993	1.1079	0.0742115
21	A21	52	73.2562	1.09712	0.0738933
21	A21	53	73.5131	1.08949	0.0736316
21	A21	54	73.7701	1.07567	0.0734425
21	A21	55	74.027	1.06771	0.0733581
21	A21	56	74.2839	1.0588	0.0734063
21	A21	57	74.5408	1.05018	0.0735684
21	A21	58	74.7978	1.0426	0.0737574
21	A21	59	75.0547	1.02827	0.0738594
21	A21	60	75.3116	1.0205	0.073806
21	A21	61	75.5686	1.00791	0.0736195
[truncated: 26,595 more rows]
